# Supplementary material for: Reliability of an interneuron response depends on an integrated sensory state
Source: eLife. 2019 Nov 13;8:e50566. doi: 10.7554/eLife.50566 (PMC6894930; doi:10.7554/eLife.50566)
Supplement: Figure 1—source data 1. [file elife-50566-fig1-data1.xlsx]

## Sheet: AWAGCaMP to dia and AWAChr
Figures 1A, 1C, 1F, 1S-1B, 1S-1C, 1S-3A, 1S-3B, 3G, 5S-3J
AWA::GCaMP2.2b F(A.U.)
Stimulus:	0																															11.5 nM diacetyl
N:	1	2	3	4	5	6	7	8	9	10	11	12	13	14	15	16	17	18	19	20	21	22	23	24	25	26	27	28	29	30		1	2	3	4	5	6	7	8	9	10	11	12	13	14	15	16	17	18
Frame (Pulse at 100)
1	2314	1592	1736	1346	4952	2378	3140	1178	5590	1935	2906	2002	1357	2942	7393	3544	2116	1619	1515	3445	2064	3118	3673	1891	2111	1807	1577	2198	7066	3323		1978	1946	1340	1856	3487	2063	2851	1357	3358	1984	1707	1611	1424	2767	5544	3357	2087	2080
2	2282	1686	1703	1293	4849	2763	3316	1228	5531	1826	3288	1753	1553	3175	7120	3480	2402	1635	1749	3888	2166	2966	3566	2145	2799	1547	1548	2187	6929	3655		1828	2353	1506	2095	3096	2201	3014	1103	3106	1967	1666	1612	1625	2779	5831	3426	1823	2030
3	2302	1328	1649	1567	4878	2328	3249	1427	5423	1825	2967	1876	1644	2857	7114	3587	2168	1803	1663	3733	2064	3074	3349	1781	3018	1574	1574	2327	6916	3348		2130	2433	1250	2094	3240	2370	2979	1202	3187	1793	1633	1533	1740	2680	5884	3022	1864	1999
4	2321	1667	1621	1505	4710	2585	3233	1480	5562	1821	3337	1795	1610	2857	7016	3300	2194	1656	1708	3722	2293	3127	3475	1741	2095	1822	1545	1977	6618	3410		2001	2342	1240	2261	3132	2224	2833	1318	3228	1934	1727	1677	1453	2853	5858	3326	1977	2459
5	2222	1730	1564	1345	4878	2603	3164	1339	5346	1530	2940	1885	1487	3012	7633	3584	2113	1322	1480	3348	2275	3165	3308	1762	2980	1661	1588	2234	7020	3681		2003	2332	1288	2293	3914	2436	2811	1176	3353	1709	1807	1557	1446	2775	5588	3204	1912	2369
6	2183	1712	1729	1423	4739	2659	3249	1324	5674	1929	3287	1826	1436	3018	7584	3385	2279	1300	1654	3515	2094	3190	3324	2144	1950	1778	1643	2314	6367	3606		1689	2240	1315	2129	3201	2392	2835	1155	3167	1896	1793	1623	1688	2944	6672	3174	2031	2319
7	2272	1271	1689	1458	4945	2544	3308	1421	5359	1864	2988	1720	1429	2943	7525	3577	2251	1722	1750	3390	2125	3000	3251	2080	2019	1610	1709	2285	6291	3489		2047	2395	1360	2073	3907	2002	2670	1127	3267	1870	1411	1627	1262	2679	6166	3260	2035	2319
8	2274	1490	1775	1375	4938	2445	3270	1273	5377	1706	3004	1649	1696	3146	7425	3502	2402	1639	1716	3563	2130	3083	3450	1701	2791	1760	1548	2064	6415	3639		2038	1772	1335	2061	3117	2305	2808	1379	3272	2003	1852	1406	1742	2831	6265	3121	2184	2154
9	2276	1727	1868	1263	4952	2454	3382	1331	5377	1898	3210	1918	1416	3561	7345	3372	2198	1665	1563	3609	2080	2949	3697	2031	2019	1514	1640	2201	6545	4011		1839	1907	1254	2009	3546	2088	3138	1178	3260	1813	1516	1570	1578	2830	5886	3124	2094	1759
10	2195	1847	1767	1426	5033	2432	3077	1182	5358	1771	3089	1694	1330	3464	7640	3423	2304	1415	1671	3441	1915	3060	3260	2012	1851	1759	1569	2194	6437	3565		2101	2313	1276	1919	3035	2150	2764	992	3191	1787	1694	1500	1558	3045	5550	3150	2028	2289
11	2060	1334	1793	1456	4709	2504	3193	1037	5333	1897	3293	1761	1327	3430	7181	3249	2295	1578	1594	3430	2029	3080	3556	1845	2069	1745	1525	2231	6978	3473		2159	1872	1360	1996	3195	2167	3070	1020	3225	1925	1756	1529	1588	2774	6589	2954	1965	2251
12	2383	1820	1828	1268	4617	2544	3031	1236	5321	1969	2978	1797	1289	3553	7500	3326	2157	1774	1480	3530	2020	3279	3546	1760	2038	1562	1796	1808	6935	3663		1994	1988	1373	1996	3032	2466	2884	1109	3233	1693	1553	1370	1569	2854	6132	3056	2009	1816
13	2186	1745	1564	1456	4825	2459	3256	1142	5244	1833	3228	1744	1644	3589	7314	3415	2304	1342	1650	3445	2167	3162	3468	2185	2668	1466	1617	2316	6813	3864		1830	2430	1256	2149	3735	2197	2866	1177	3012	1773	1771	1651	1544	2641	5857	3189	1868	1951
14	2253	1951	1648	1467	4652	2471	3124	1271	5073	1783	3103	1669	1834	3363	7267	3738	2105	1572	1860	3577	2059	3171	3652	1808	1919	1558	1798	2477	7247	3564		1869	2261	1411	2092	3063	2368	2908	1366	3009	1855	1703	1597	1464	2737	5781	3285	1778	2446
15	2202	1348	1800	1474	4770	2597	3196	1318	5034	1968	2891	1831	1546	3403	7319	3218	2067	1330	1569	3349	2246	3054	3664	1970	2194	1698	1735	2252	5314	3501		2051	2338	1436	2229	3836	2498	3032	1254	3215	1615	1848	1769	1755	2948	5507	3175	2085	2248
16	2202	1732	1650	1520	4660	2337	3003	1197	5163	1816	3036	1754	1489	3693	7612	3895	2104	1671	1466	3572	2133	3244	3584	2011	1887	1723	1660	2261	8364	3715		1963	2162	1348	2214	3231	2117	2863	1166	3008	1906	1928	1847	1529	2589	6394	2977	2048	1946
17	2439	1264	1726	1397	4669	2368	3317	1247	5212	1940	3130	1733	1643	3450	7317	3529	2009	1724	1652	3512	2095	3162	3571	2206	1920	1669	1553	2451	7972	3985		1874	1886	1302	2062	3669	1976	2905	1049	3141	1879	1669	1559	1254	2835	6376	3202	2113	2111
18	2037	1756	1584	1478	4775	2634	3390	1397	5321	1889	3022	1765	1600	3326	7380	3542	2136	1696	1645	3325	2082	2736	3636	2004	2075	1542	1768	2396	7570	3930		2078	2256	1359	2133	3760	1903	2979	1338	3209	1690	1664	1418	1558	2890	5955	3238	1941	1885
19	2256	1729	1794	1431	4715	2722	3130	1276	4989	1891	3016	1914	1577	3275	7388	3538	2292	1733	1675	3712	2116	2934	3387	2005	2640	1538	1660	2187	8464	3647		1739	2450	1259	2041	3108	2113	2896	1259	3271	2086	1806	1353	1637	2593	5867	2938	1832	2074
20	2313	1621	1621	1375	4612	2605	3254	1323	5385	1773	3144	1742	1503	3064	7250	3507	2108	1210	1768	3466	1994	3181	3441	2031	1745	1716	1771	2274	8401	3497		1892	2362	1353	2072	3891	2202	2757	978	3268	1905	1877	1499	1478	2644	5777	3169	2118	2079
21	2233	1901	1704	1434	4744	2510	3141	1302	5156	1926	3075	1824	1532	3274	7326	3503	2302	1565	1692	3509	2141	3185	3288	2090	2068	1590	1766	2107	8206	3663		1997	2443	1332	2083	3070	2126	2796	886	3076	1650	1769	1619	1381	2638	6504	3206	2028	2394
22	2154	1283	1691	1567	4645	2476	3217	1318	4750	1864	3071	1747	1540	3202	7315	3278	2185	1684	1479	3468	2112	3355	3403	1770	2736	1824	1606	2439	8470	3517		1840	1942	1426	2030	3280	2317	2663	918	3227	1926	1733	1670	1530	2800	6489	3368	2058	2419
23	2344	1674	1792	1526	4756	2489	3047	1190	4820	1943	2838	1959	1644	3096	7507	3065	2186	1041	1632	3425	1920	2991	3147	2208	2633	1401	1721	2290	8314	3588		1750	2443	1302	2061	3248	2149	2849	1103	3273	1783	1642	1505	1507	2738	6745	3205	2060	2099
24	2237	1744	1642	1409	4607	2318	3201	1139	5138	1774	3023	1988	1659	3378	7284	3493	2235	1852	1597	3583	2116	3243	3476	2218	2031	1745	1728	2226	8253	3459		1784	2533	1476	1887	3081	2006	2775	1012	3278	1718	1705	1473	1364	2677	6245	3263	2003	2017
25	2400	1889	1650	1496	4803	2414	3204	1375	4688	1741	2960	1687	1558	3156	7697	3348	2111	1625	1636	3465	2014	3041	3367	2156	2799	1571	1729	2466	8621	3621		1788	2605	1167	1898	3643	2042	2810	1213	3144	1797	1754	1778	1511	2553	6694	2891	1896	1579
26	2193	1693	1658	1499	4762	2590	3312	1316	4985	1821	3094	1860	1621	3404	7241	3237	2231	1726	1548	3562	2016	2958	3418	1810	2718	1693	1784	2370	8638	3864		2006	2414	1399	1894	3323	2177	2712	1082	3108	1712	1760	1827	1953	2634	5229	3351	1884	2359
27	2086	1729	1791	1358	4817	2472	3169	1369	4927	1933	3161	1906	1668	3253	7332	3484	2192	1684	1694	3606	2141	3117	3507	1950	1910	1694	1563	2299	8807	3509		1836	2036	1265	2018	3970	2157	2741	966	3167	1713	1670	1378	1380	2662	5522	3118	2045	2193
28	2313	1754	1692	1427	4579	2550	3161	1267	4743	1868	3031	1703	1535	3335	7076	3628	2131	1729	1620	3621	2136	3247	3402	2292	1994	1831	1587	2226	8650	3701		1973	2426	1358	2104	3839	2124	2688	1209	3051	1900	1376	1571	1331	2636	5333	3404	1951	2302
29	2313	1236	1605	1396	4606	2686	3110	1164	4998	1922	2924	1823	1597	3132	7105	3503	2132	1584	1642	3545	1985	3005	3523	1915	1980	1570	1804	2285	8860	3553		1838	2397	1326	2171	3238	2163	2814	1213	3296	2015	1736	1474	1472	2543	6574	3175	2012	2200
30	2219	1757	1717	1413	4904	2549	3161	1239	4773	1995	2974	1528	1522	3458	7280	3563	2115	1600	1662	3393	1877	3096	3404	1870	2004	1765	1734	2334	7410	3471		1804	2469	1307	2075	3166	2114	2810	1123	3042	1883	1612	1531	1474	2670	6570	3252	2079	2366
31	2212	1722	1720	1392	4657	2691	3244	1516	4945	1878	3010	1855	1654	3150	7591	3512	2339	1565	1684	3820	2094	3300	3377	2137	2925	1572	1497	2137	7271	3615		1922	2487	1406	2232	3244	1973	2950	1363	3506	1790	1881	1599	1483	2834	6643	3134	1937	2192
32	2309	1293	1668	1607	4680	2561	3241	1406	5038	1963	3188	1608	1506	3185	7387	3408	2131	1632	1665	3691	2036	3175	3563	2068	2078	1732	1644	2407	7286	3484		2011	2547	1364	1987	3209	2110	2729	1051	3128	1740	1602	1551	1430	2665	6769	3131	2050	2324
33	2273	1815	1645	1315	4738	2474	3304	1533	4944	1789	3014	1681	1625	2997	7475	3527	2087	1825	1668	3775	1887	3130	3565	1909	2598	1432	1604	2540	8092	3567		1954	2284	1397	1978	3460	2002	3022	1155	3237	1589	1438	1365	1380	2767	6454	2951	1887	2222
34	2254	1673	1732	1346	4749	2576	3264	1157	4798	1836	3023	2065	1576	3167	7112	3440	2150	1334	1620	3693	2014	3245	3346	1766	2019	1595	1519	2129	8382	3458		1788	2528	1293	2008	3428	2232	2718	993	3062	1985	1593	1745	1349	2988	6454	2975	2027	2161
35	2284	1708	1585	1529	4717	2554	3397	1305	4638	2123	3010	1843	1667	3101	7434	3381	2167	1735	1611	3628	1985	3053	3439	2200	2116	1858	1655	2296	8365	3483		1847	2357	1539	1935	3918	2548	2818	1150	3388	1770	1834	1396	1463	2663	5572	3070	2059	2280
36	2247	1657	1687	1360	4690	2923	3211	1241	4989	1976	3109	1934	1428	3099	7491	3436	2094	1732	1678	3556	1946	3294	3514	1775	2008	1688	1887	2341	8612	3701		1791	2379	1396	2100	3943	2144	2894	1001	3245	1815	1787	1670	1402	3045	6280	3390	1784	2206
37	2329	1877	1721	1547	4615	2884	3018	1227	4939	2005	2910	1600	1511	3059	7399	3566	2095	1753	1559	3703	2005	3168	3475	2058	2008	1707	1842	2194	7148	3616		1968	2449	1382	2161	3248	2052	2863	1043	3051	1583	1696	1586	1435	2896	5616	3075	1905	2172
38	2322	1804	1749	1494	4560	3040	3107	1151	4643	1732	3074	1868	1340	2872	7330	3487	2230	1633	1683	3479	2087	2992	3285	2190	2099	1751	1817	2007	7200	3942		1839	2537	1199	2172	3728	1938	2588	1177	3311	1935	1649	1473	1611	2670	6199	3100	1905	2273
39	2225	1412	1815	1435	4546	3141	3199	1288	4765	1869	3105	1715	1416	3300	7323	3424	2145	1696	1604	3516	2001	2974	3458	1883	2682	1683	1759	2418	6928	3555		1748	2036	1246	2052	3477	2328	2924	1094	3238	1767	1427	1522	1969	2890	6016	2989	1698	2141
40	2389	1288	1671	1497	4321	3164	3530	1311	4704	1885	2716	1738	1350	3005	7164	3498	2064	1700	1585	3597	2041	2872	3575	2003	1953	1687	1640	2381	6975	3215		1816	2310	1291	1979	3761	2020	2731	966	3334	1895	1541	1554	1510	2596	5035	3021	2017	2062
41	2456	1925	1761	1845	4565	3131	3293	1315	4687	1946	3024	1887	1668	3117	7190	3433	2170	1608	1446	3430	2035	2815	3455	2242	1884	1679	1572	2537	7014	3792		1791	2278	1376	2109	3714	2001	2819	1197	3279	1763	1625	1395	1449	2813	5602	3185	1923	2206
42	2201	1663	1725	1426	4447	2991	3181	1324	4500	1972	3143	1706	1380	3221	7244	3233	2215	1641	1638	3767	2083	3226	3493	1744	1812	1713	1547	2305	6671	3628		1786	2268	1320	2087	3941	2068	2676	1042	3175	1677	1418	1413	1417	2736	6271	3141	1895	2124
43	2220	1771	1731	1362	4638	3174	3099	1360	4920	1945	3144	1888	1663	3213	7417	3679	1945	1738	1549	3438	2081	3034	3483	1916	1900	1777	1727	2405	6929	3465		1793	2360	1386	2096	3179	2144	2754	1190	3324	1842	1725	1491	1379	2536	5122	3292	1840	2305
44	2308	1344	1560	1454	4406	3130	3353	1328	5161	2006	2983	1811	1490	3037	7457	3376	2017	1624	1768	3563	2026	3227	3409	1943	1874	1823	1635	2451	7017	3412		1745	2434	1476	2142	3147	2087	2780	1264	3336	1686	1625	1624	1515	2805	5875	3029	1879	2299
45	2215	1900	1694	1451	4744	3059	3369	1367	4810	1854	2893	1694	1751	3187	7321	3554	2250	1707	1646	3330	2007	3035	3443	1813	2748	1622	1762	2322	6806	3480		1987	2421	1227	2111	4123	2069	2933	1088	3240	2071	1802	1205	1455	2571	6174	3113	1883	2243
46	2076	1810	1831	1593	4599	2991	3069	1394	5539	2006	2983	1668	1398	3134	7478	3537	2086	1247	1736	3660	2043	3015	3352	1803	1790	1833	1616	2379	6517	3411		2010	1949	1468	1986	3715	2113	2688	1153	3154	1778	1704	1565	1545	2523	5881	3332	1975	2328
47	2151	1704	1827	1442	4491	2976	3110	1255	5795	1891	3123	1854	1560	3213	7505	3593	1959	1717	1548	3421	2124	3250	3648	1985	1958	1570	1819	2291	7154	3836		1892	2378	1228	2062	3816	2153	2917	1017	3543	2045	1886	1464	1547	2933	6318	3321	2010	2358
48	2410	1633	1785	1410	4525	2985	3157	1302	5625	2008	2782	1873	1534	3275	7571	3410	2215	1680	1743	3578	1954	2920	3311	2072	1925	1609	1676	2377	7398	3336		1798	2201	1358	2075	3814	2005	2941	1169	3136	1728	1692	1543	1479	2773	6099	3346	1824	2351
49	2240	1624	1757	1548	4521	3030	3171	1292	5443	2020	3001	1616	1248	3087	7523	3507	2213	1729	1627	3412	2092	3358	3332	2198	1761	1667	1558	2439	7602	4266		1743	2509	1279	1885	4335	2211	2696	1233	3333	1818	1390	1606	1557	2799	6267	3147	1882	2226
50	2207	1719	1575	1455	4448	2774	3260	1317	5687	1837	2957	1750	1535	3089	7330	3485	2138	1665	1553	3568	2092	3224	3385	1715	1834	1659	1670	2536	7565	3956		1880	2323	1278	1992	4493	2315	2807	1042	3457	1910	1714	1530	1417	2622	6002	3312	1790	2201
51	2385	1758	1701	1421	4616	2947	3226	1430	5504	1782	3013	1690	1501	3182	7219	3421	2053	1584	1772	3528	2145	3031	3446	2226	2582	1686	1695	2525	7697	3531		1866	2321	1350	2096	4350	2303	2749	938	3503	1915	1691	1667	1365	2736	5824	3139	1726	2285
52	2392	1939	1636	1391	4598	2831	3315	1320	5527	1998	2882	1722	1339	2890	7332	3168	2203	1643	1573	3429	2048	2928	3478	2054	1841	1718	1824	2270	7892	3945		1931	2497	1291	2151	3724	2233	2768	1234	3329	1814	1745	1622	1388	2393	5701	3286	1902	2347
53	2288	1644	1631	1445	4469	3391	3394	1338	5651	1889	2865	1845	1337	3069	6651	3506	2116	1552	1571	3356	1945	3081	3584	1679	1862	1693	1652	2257	7855	3692		1883	2409	1291	2213	4136	2021	2797	1196	3189	1974	1800	1620	1346	2895	5403	2970	1894	1878
54	2380	1789	1616	1491	4742	3157	3235	1112	5483	2128	2788	1770	1247	3186	7102	3253	2257	1415	1818	3305	2026	3008	3594	1734	1902	1734	1793	2292	7393	3741		1868	2085	1417	2101	4046	2088	2991	1060	3545	1888	1700	1574	1594	2547	6037	3288	1926	2309
55	2372	1935	1712	1505	4456	3608	3319	1241	4994	2091	3045	1718	1540	3162	7752	3289	2289	1798	1615	3445	1986	3269	3530	2141	2579	1704	1819	2386	7614	3870		1808	2342	1438	2203	3772	1971	2754	1156	3396	1872	1710	1469	1440	2807	5103	3261	1786	1976
56	2182	1939	1622	1404	4604	3645	3326	1404	5362	1991	2813	1892	1501	3100	7180	3376	2163	1691	1781	3628	2033	3149	3420	1893	2352	1774	1710	2240	7600	3565		1927	2289	1483	2293	3730	2224	2848	922	3366	1767	1470	1479	1465	2765	5806	3080	2022	2248
57	2062	1865	1619	1411	4343	3419	3241	1344	5371	1891	2996	1650	1451	2924	7433	3690	2047	1658	1627	3546	2051	3003	3228	1903	1859	1966	1862	2261	7814	3943		2055	2325	1281	2319	3663	2148	2901	1358	3194	1771	1848	1658	1445	2585	5510	3069	1766	2411
58	2154	2024	1738	1282	4445	3459	3604	1366	5162	1818	2954	1839	1556	3164	7639	3592	2189	1255	1623	3269	1999	3230	3470	1750	1893	1769	1684	2334	8022	3880		1617	1953	1392	1838	3879	2249	2732	1090	3182	1682	1281	1501	1471	2937	5647	3064	1722	2199
59	2235	1471	1801	1380	4582	3590	3191	1483	5002	1982	3279	1899	1565	3184	7045	3498	2175	1803	1685	3507	1932	3110	3635	1811	1817	1876	1823	2450	8127	3980		1945	2048	1268	1844	4780	2177	2672	1103	3242	2044	1644	1475	1492	2903	5545	3105	1938	2210
60	2332	1899	1662	1537	4609	3489	3315	1277	5088	1956	3137	1626	1373	3015	7392	3570	2152	1702	1561	3610	2005	2952	3539	1982	2456	1907	1731	2345	8179	3521		1885	1920	1314	2371	4058	2189	2719	1027	3092	2021	1420	1570	1403	2692	5562	3110	1901	2135
61	2241	2048	1672	1494	4486	3545	3147	1151	4963	2005	3130	1858	1510	3060	7082	3413	2147	1672	1473	3396	2061	3118	3418	1740	1863	1733	1815	2354	8009	3599		1936	1966	1376	2071	3988	2135	2652	970	3444	1737	1416	1508	1309	2804	5532	3151	1859	2228
62	2323	2085	1631	1353	4469	3325	3134	1198	5244	1655	3083	1650	1683	2919	7291	3315	2102	1894	1640	3384	2033	3160	3560	1847	1933	1879	1594	2317	8283	3546		1872	2501	1451	1967	3748	2346	2666	1191	3343	1913	1821	1541	1743	2673	6010	3309	2030	2304
63	2228	2010	1604	1416	4602	3358	3373	1324	4784	1812	3130	1748	1636	2955	6826	3325	2235	1694	1713	3310	2045	3126	3573	2018	1829	1826	1664	2398	8044	3524		1826	2330	1216	2355	4270	2154	3129	1011	3279	1836	1748	1446	1353	2645	5421	3033	1807	2170
64	2308	2112	1827	1431	4776	3336	3270	1191	5057	1863	2944	1850	1224	3061	7489	3511	2122	1849	1571	3663	2107	3190	3858	2076	1876	1892	1947	2345	7918	3960		1725	2113	1222	2305	3773	2157	2524	1077	3481	1824	1795	1578	1590	2738	5758	3004	2005	2167
65	2264	1940	1649	1390	4481	3478	3364	1068	4596	1892	3034	1651	1639	2872	7405	3576	2118	1658	1769	3771	2037	2818	3680	2252	1807	1839	1781	2431	8447	3581		1845	2242	1300	2252	4438	2106	2766	1256	3383	1902	1779	1618	1513	2597	5880	3293	1996	2260
66	2151	2069	1766	1418	4322	3343	3131	1259	5102	1759	3337	1920	1492	2897	7124	3452	2270	1745	1603	3342	1956	3185	3549	1906	2559	1956	1701	2418	8199	3721		1857	2389	1500	1990	4345	2205	2803	1138	3393	1778	1543	1608	1698	2615	5910	3459	1702	2268
67	2266	1933	1862	1442	4679	3190	3017	1239	4881	1813	2955	1639	1417	3161	7308	3220	2210	1683	1561	3596	2094	3143	3508	2107	1889	1808	1888	2219	8400	3743		1806	2392	1299	2208	4407	2010	2723	1020	3551	1923	1799	1420	1348	2699	5914	2996	1771	1971
68	2295	2036	1884	1343	4674	3418	3121	1373	5011	1993	2994	1894	1440	2968	7243	3273	2200	1664	1641	3378	1956	3240	3540	1720	1909	1811	1781	2128	8197	3754		1741	2048	1184	1988	4367	2069	3070	1174	3502	1700	1794	1539	1818	2780	6088	3096	2002	2124
69	2284	1908	1846	1523	4459	3188	3315	1198	5061	1962	3054	1673	1419	3227	7329	3792	2167	1640	1716	3421	2108	3250	3623	2054	1848	1921	1550	2054	7227	4131		1939	2175	1285	2227	4206	2054	2837	999	3302	1833	1735	1550	1260	2659	5777	3191	1820	2373
70	2265	1547	1671	1606	4372	3418	3321	1350	5176	1910	2835	1785	1833	2830	7094	3426	2150	1797	1503	3606	2061	3165	3567	1946	1802	1903	1832	2564	7264	3664		1968	2182	1206	2075	3727	2272	2763	1228	3592	1907	1718	1578	1641	2849	5645	3210	1811	2285
71	2336	2003	1678	1440	4590	3193	3255	1364	4890	1759	2979	1875	1559	3122	7116	3322	2214	1646	1767	3405	2066	2918	3633	1661	2045	1869	1709	2322	7241	3816		1766	2073	1361	1970	4279	2252	3040	1183	3266	1894	1613	1815	1467	2666	6005	3239	1942	2217
72	2370	1934	1647	1505	4531	3266	3430	1233	5187	1810	2771	1772	1687	2831	7402	3406	2300	1605	1606	3690	2072	2934	3802	1799	1751	1873	1903	2137	8458	3824		1894	2240	1314	2207	3651	1969	2736	1187	3461	1931	1681	1624	1900	2728	5712	3118	1830	2276
73	2187	1729	1675	1541	4588	3128	3087	1417	4979	2126	3023	1682	1517	2765	7264	3274	2244	1591	1691	3447	2008	2934	3612	1847	2093	1745	1754	2226	6766	3873		1960	2378	1386	2012	3668	2281	2809	794	3300	1666	1770	1645	1442	2533	5466	2851	2251	2189
74	2203	1766	1723	1589	4426	2968	3277	1403	5143	2055	3258	2025	1740	2925	7643	3258	2152	1761	1613	3610	1984	3001	3346	1993	2129	1933	1728	2268	8246	3557		1786	1721	1564	2002	4063	2057	2746	1086	3345	1779	1806	1519	1467	2844	5445	3089	1904	2332
75	2143	1993	1756	1454	4536	3301	3016	1353	4864	2192	3220	1748	1521	3042	7349	3670	2101	1350	1314	3581	2058	3009	3615	2170	2112	1775	1781	2400	8359	3566		1897	2389	1325	2121	3616	2099	3127	1250	3348	1713	1424	1732	1447	2848	6125	3315	1897	1949
76	2178	2085	1785	1423	4403	3142	2997	1348	4610	1974	3171	1747	1355	2928	7338	3364	2120	1679	1642	3701	1856	3210	3553	2011	2015	1747	1797	2174	8398	4157		1869	2043	1394	2045	4353	2125	2801	1135	3384	1840	1582	1417	1547	2693	5803	3207	1921	2229
77	2128	2122	1488	1393	4302	3247	3074	1305	4677	2047	3011	1850	1382	2969	7357	3288	1993	1604	1681	3416	2053	3022	3689	2100	2038	1893	1686	2439	8223	3414		1705	2283	1301	2116	3637	2307	2866	1010	3174	1775	1636	1699	1893	2519	5810	3254	2020	2281
78	2304	1674	1659	1484	4144	2823	3149	1296	4800	2002	2844	2041	1249	2938	7087	3348	2117	1781	1705	3566	1971	2918	3670	1930	2004	1633	1696	2189	8544	3758		1786	2169	1417	2005	4264	2138	3021	1005	3400	2122	1884	1684	1585	2741	5594	2990	1886	2220
79	2188	1909	1776	1534	4438	2795	3244	1319	4829	2190	3006	1956	1664	2857	7178	3393	2172	1466	1497	3509	2021	2925	3539	1882	2091	1797	1561	2318	8760	3777		2170	2404	1374	2058	3663	2041	3064	836	3427	1817	1736	1561	1769	2841	5775	3045	1948	2268
80	2442	1734	1392	1254	4293	3149	3114	1456	4888	2071	3128	1873	1265	3035	7483	3467	2194	1799	1717	3371	2028	3202	3825	1908	1930	1860	1757	2302	8233	3711		1841	2041	1293	1937	4262	2123	3036	933	3328	1806	1904	1417	1295	2863	5508	3280	1687	2268
81	2100	2162	1766	1506	4566	3211	3184	1080	4850	2092	3013	1827	1563	2899	7247	3199	2101	1288	1698	3516	1970	3230	3532	1894	1950	1874	1748	2240	6924	4159		1992	2054	1298	2059	3562	2290	2902	1305	3131	1860	1722	1532	1439	2901	5929	3061	1898	2068
82	2132	2250	1351	1423	4302	3193	3376	1599	4582	2042	3082	1877	1317	2823	7302	3334	2042	1241	1746	3289	2057	2946	3598	1745	1928	2098	1777	2444	8226	4219		1946	1571	1079	1925	4068	1971	2912	1038	3286	1621	1753	1613	1423	2799	6159	3163	1830	2216
83	2327	2273	1739	1304	4370	3087	3253	1094	4785	2071	3044	1772	1673	2947	7282	3904	2308	1638	1644	3479	2010	2993	3621	1725	2017	1554	1441	2213	8376	3881		1864	1719	1299	1994	4122	2066	2930	1091	3227	1741	1865	1394	1508	2841	5939	3128	2007	2062
84	2328	2353	1707	1478	4284	2964	3210	1515	4595	1820	2932	1827	1607	2889	7269	3460	2253	1342	1675	3727	2014	3009	3690	1744	1976	1779	1871	2485	8204	3641		1994	2139	1359	1749	4256	2195	3073	1049	3558	1872	1442	1653	1412	2542	5742	3193	1796	2315
85	2106	2477	1533	1462	4233	2870	3208	1163	4985	2124	3128	2039	1586	2973	7245	3862	2174	1811	1718	3511	2130	3099	3600	1934	2220	1806	1282	2414	6863	3991		1764	1758	1428	1920	4556	2066	2845	1185	3460	1764	1756	1597	1555	2717	6324	3172	1992	2030
86	2324	2289	1728	1429	4280	2722	3339	1363	4496	1956	3093	1656	1424	3106	7124	3741	2260	1865	1627	3552	2053	3180	3854	2242	1846	1833	1785	2346	7965	3661		1788	2107	1276	1904	4452	2202	2658	1079	3302	2155	1475	1578	1437	2627	5576	3249	1870	2136
87	2479	2489	1524	1328	4250	3162	3354	1293	4835	1968	2943	1837	1683	2905	7676	3727	2103	1727	1726	3567	1957	3155	3513	1752	1996	1772	1691	2234	8363	3786		1685	2298	1392	1873	3671	1903	3071	885	3529	1761	1300	1490	1445	2495	5734	3200	1793	2077
88	2235	2506	1688	1618	4289	2961	3254	1129	4846	1918	3355	1790	1355	2840	7453	3468	2443	1792	1670	3252	1962	3010	3838	1662	1885	1821	1776	2243	7049	4336		1961	2182	1408	1889	4535	2179	2719	1072	3452	1969	1564	1484	1864	2778	5453	3201	1855	2395
89	2154	2436	1553	1357	4162	3216	3217	1362	4567	2134	3210	1671	1385	3012	7319	3646	2184	1506	1636	3327	2198	3009	3773	1778	1885	1863	1437	2064	8151	3558		1903	2183	1242	1898	4756	2082	2918	1122	3206	1987	1769	1517	1695	2724	6348	3309	1958	2332
90	2276	2388	1637	1386	4421	3061	3106	1383	4553	1985	3165	1992	1508	3040	7335	3764	2417	1760	1686	3551	2155	3212	3723	2095	1888	1890	1726	2307	8167	3879		1859	2049	1388	1935	4432	2148	3141	1024	3383	1799	1700	1663	1803	2666	6328	3283	1932	1940
91	2429	2275	1627	1482	4496	3009	3078	1303	4602	1906	3030	2139	1445	2930	7325	3623	2208	1756	1614	3592	1925	3213	3766	1753	2130	1728	1828	2354	6753	3591		1739	2377	1453	1899	3962	2130	3058	1160	3605	1943	1591	1674	1443	2772	5901	3376	1784	2016
92	2284	2242	1559	1530	4202	3117	2938	1217	4688	1733	3109	1927	1421	2845	7147	3231	2211	1692	1787	3405	2103	2998	3546	1992	1900	1727	1486	2356	8294	3700		1736	1705	1287	1928	4483	2167	2659	1186	3414	1856	1747	1441	1819	2933	5939	3274	2013	2326
93	2143	2062	1823	1463	4365	2990	3003	1393	4293	1962	3178	1962	1472	3140	7491	3118	2253	1736	1573	3394	2006	3003	3811	1974	2005	1785	1558	2365	8595	3659		1889	2030	1338	1978	3656	2021	2781	1119	3389	1974	1819	1648	1288	2728	5937	3328	1833	2505
94	2209	2138	1574	1419	4456	3054	3217	1486	4560	2057	3197	1808	1476	2833	6895	3754	2375	1651	1686	3361	2108	2954	3888	1826	1940	1912	1754	2269	7140	3801		1679	2287	1182	1911	4316	2288	3125	1365	3353	1581	1638	1710	1589	2841	6049	3051	1924	2434
95	2213	1992	1824	1546	4274	3358	3258	1149	4475	2006	3119	1876	1371	3088	6825	3678	2100	1804	1549	3618	1972	2842	3546	1822	2057	2011	1756	2386	6853	3915		1781	2034	1347	1844	3548	2306	2801	1141	3592	1744	1653	1814	1500	2731	5273	3213	1977	2434
96	2198	2257	1670	1425	4300	3422	3254	1501	4530	1788	2987	1908	1579	3159	7221	3317	2165	1720	1499	3536	2056	3101	3875	1863	1869	1896	1747	2315	7014	3775		1727	2041	1417	2011	4560	2021	2859	1204	3412	1893	1364	1503	1654	2707	6135	3066	1843	2099
97	2290	2148	1923	1709	4551	3117	3275	1191	4574	1972	3234	1959	1313	3220	7272	3165	2231	1692	1772	3630	1920	3042	3706	2002	1902	1989	1749	2454	7151	3384		1853	2090	1286	1954	3729	2104	3017	1180	3279	1576	1794	1691	1716	2636	6248	3262	1948	2283
98	2276	2126	1677	1639	4301	3270	3414	1139	4343	1843	3243	1937	1500	3378	7469	3612	2127	1685	1446	3463	2140	2891	3407	1963	2014	1923	1746	2352	7167	3822		1978	2359	1382	1964	4413	2116	2602	871	3466	1889	1796	1638	1452	2802	5595	3080	2035	2129
99	2269	2195	1795	1439	4386	3019	3529	1487	4584	1830	3308	1740	1371	3675	7229	3670	2284	1627	1579	3492	1927	3073	3203	1852	1926	2010	1461	2581	7088	3726		1786	2016	1401	1911	3673	2190	2577	1016	3248	1757	1852	1599	1410	2552	6021	3040	1980	2131
100	2135	2117	1783	1395	4020	3107	2971	1276	4457	1745	3140	1830	1401	3802	7397	3504	2242	1675	1568	3415	2080	3102	3681	1782	2040	1975	1814	2327	7302	3930		1795	2158	1341	1834	4283	1996	2870	1337	3451	1841	1695	1611	1651	2691	5639	3105	1922	2240
101	2245	2156	1771	1381	4119	3127	3235	992	4542	2096	3088	2006	1856	3703	7215	3360	2439	1742	1580	3646	1962	3102	3692	1998	1939	1800	1790	2398	7637	3743		1814	2629	1352	1680	3851	2109	2732	1144	3265	1861	1733	1604	1746	2878	5647	2882	1914	2443
102	2159	2092	1685	1342	4351	3306	3166	1223	4328	1670	3419	1991	1538	3785	7259	3140	2160	1671	1515	3621	1800	3003	3556	1983	1972	1834	1360	2098	7489	3672		1981	2474	1310	1601	4223	2051	2638	969	3392	1960	1760	1557	1699	2715	5678	3059	1802	2430
103	1986	2145	1669	1386	4156	3272	3133	1115	4455	2145	3149	1737	1880	3545	7383	3541	2169	1682	1667	4049	2064	3013	3683	1851	1942	2086	1928	2230	7748	3492		1923	2170	1276	1814	4252	2169	2973	878	3188	1890	1789	1719	1579	3241	5516	3110	1983	2082
104	2195	1995	1674	1391	4412	2927	3341	1354	4164	1954	3027	1797	1622	3270	7349	3470	2075	1571	1674	4036	1863	2998	3536	1881	1804	1769	1980	2243	7591	3709		1725	2184	1525	1880	4486	2168	2804	1110	3444	1830	1797	1777	1315	2720	5574	2753	1856	1960
105	2300	1601	1676	1464	4209	3129	3369	1483	4282	2214	3098	1999	1768	3540	7332	3446	2111	1853	1773	4638	2010	2943	3614	1758	1616	1875	1711	2388	7772	3521		1865	2425	1352	2077	4366	2127	2822	1121	3641	1976	1809	1546	1675	2746	5433	3010	1986	2392
106	2363	2062	1588	1456	4159	3523	3060	1099	4434	1990	2996	1865	1612	3544	6518	3432	2196	1794	1489	5754	1975	3044	3696	1862	1838	1806	1703	2399	7291	4389		1859	2322	1373	1940	4769	2270	2866	1189	3464	1757	1662	1455	1710	2806	5680	2910	2031	2204
107	2268	1998	1689	1381	4217	3133	3243	1445	4306	1851	3077	1849	1602	3558	7502	3720	2226	1870	1740	6583	1994	3209	3096	1857	1919	1723	2102	2414	7481	4091		1993	1861	1225	2040	4733	2206	2796	1114	3597	1853	1671	1515	1630	2661	5648	3082	2178	1774
108	2166	2160	1610	1475	4455	3138	3345	1372	4188	1956	3092	1985	1630	3291	7313	3392	2158	1653	1607	6763	1911	3142	3531	2044	1974	1822	1233	2511	7419	3488		1892	1874	1444	1915	4682	1986	2848	974	3685	1737	1925	1687	1755	3000	5474	3316	1933	2402
109	2360	2175	1722	1494	4246	3009	3210	1427	4241	1868	3053	1953	1670	3254	7287	3657	2208	1827	1677	6750	1992	2969	3570	1976	2016	2088	1776	2277	7018	4373		2342	2266	1496	1866	4936	2194	2906	1215	3745	1835	1656	1392	1607	2737	5553	3100	2021	2325
110	2268	1999	1555	1437	4184	3050	3216	1279	4146	1841	3174	1961	1541	3548	7148	3451	2006	1677	1536	6570	2038	2857	3776	1798	1780	1855	1432	2196	7155	4122		1862	1966	1325	1866	3995	2342	2803	757	4121	1877	1424	1627	1629	2836	5868	3019	1794	2281
111	2043	2068	1823	1464	4291	2968	3071	1366	4225	2045	3105	1971	1591	3350	7363	3210	2345	1621	1681	6231	2104	3187	3778	1960	1930	1814	1703	2661	7208	4286		1677	2546	1354	1908	4558	2234	2661	965	4144	1864	1370	1460	1547	2690	5886	3107	1858	1816
112	2312	2063	1652	1397	4160	3079	3324	1367	3874	1919	3158	1788	1545	3343	7087	3551	1985	1677	1639	6086	2046	3172	3534	1904	1909	1852	1486	2339	7249	4311		1941	2494	1319	1960	4471	2573	2863	1133	4012	1824	1813	1346	1765	2634	5896	3163	1824	2575
113	2185	1669	1687	1397	4100	2874	3175	1372	4024	2141	3028	1910	1796	3303	6987	3439	2053	1725	1598	5878	2106	2937	3650	1916	1969	1925	1666	2241	7255	4375		1821	2506	1411	1964	4013	2016	2818	1015	4683	1601	1825	1628	1553	2887	5820	3135	1897	2202
114	2348	2140	1564	1443	4295	3051	3145	1407	4226	1935	3112	1941	1722	3253	7207	3468	2348	1683	1642	5714	2066	2988	3495	2086	1884	1859	1699	2323	7194	4387		1885	2301	1304	2117	4856	2057	2921	1017	4758	1723	1727	1344	1736	2878	5573	3154	2012	2165
115	2209	1970	1656	1567	4089	3358	3576	1357	3872	2214	3106	1735	1481	3393	7299	3168	2208	1748	1327	5674	2062	3195	3789	1911	1945	1892	1783	2180	7081	4305		1782	2395	1389	1913	4861	2244	2663	1095	4636	1936	1736	1651	1689	2968	5874	2980	2015	2310
116	2544	1948	1639	1441	4053	3416	3292	1282	4069	2102	3185	1927	1489	3103	7318	3278	2260	1764	1474	6216	2200	3017	3468	1822	1902	2049	1454	2243	7135	4023		1945	1979	1440	2129	4486	2201	2879	986	5137	1786	1775	1685	1678	2978	5934	3170	2028	2359
117	2153	2042	1724	1591	4219	3571	3325	1238	3844	1801	3197	1877	1498	3181	7281	3338	2282	1692	1630	5779	1912	3104	3512	1775	2060	1924	1326	2281	7302	4060		2077	2438	1244	1991	4705	2248	2775	1297	5054	1861	1692	1649	1602	3135	5871	3184	2056	2337
118	2289	1597	1637	1756	4284	4041	3231	1326	4106	2147	3144	1968	1771	3159	7215	3436	2247	1558	1672	5843	1942	2833	3592	1856	1917	1632	1449	2362	7113	3983		1637	2422	1314	2003	5526	2365	2844	1166	5111	1869	1802	1711	1740	3261	6082	3318	2099	2292
119	2361	1868	1739	1572	4255	3914	3068	1365	3810	1949	3243	1757	1860	3288	7335	3303	2103	1735	1566	6142	1871	3147	3618	1925	1953	1881	1853	2159	6955	4021		1991	2296	1483	1987	4758	2120	2732	939	4911	1905	1538	1681	1682	3306	6101	3042	1919	2366
120	2136	2142	1766	1608	4097	3741	3223	1206	3726	2097	3355	1629	1602	3390	7250	3348	2085	1707	1510	5768	2065	3145	3500	1839	1916	1862	1431	2442	7054	3819		1871	2499	1469	2058	4728	2053	2715	1159	5154	1793	1725	1700	1651	3229	5654	3199	1913	2267
121	2231	2198	1622	1447	4390	3791	3331	1258	3949	2008	3046	1668	1566	3407	7476	3684	2255	1680	1647	5567	2136	3159	3087	1926	2027	1632	1454	2349	6990	3852		1877	2272	1462	1912	4810	2048	2652	1243	5411	1921	1794	1583	1585	3259	5969	3318	2025	2001
122	2128	2374	1443	1588	4077	3860	3316	1295	3837	1910	3235	1853	1545	3554	7452	3601	2212	1683	1590	5655	2021	2962	3830	2118	1979	1808	1806	2288	6948	4106		1786	2052	1258	2035	5426	2191	2740	1109	5517	1977	1856	1726	1690	3203	6516	3051	2113	2329
123	2164	2293	1636	1428	4331	3363	3186	1086	3781	1996	2999	1717	1425	3943	7422	3328	2305	1797	1755	5580	1826	3258	3607	1753	1865	1574	1533	2318	6802	4021		1901	2026	1392	2039	4610	2226	2962	1197	5502	1969	1978	1784	1480	3794	6888	3340	2005	2488
124	2304	2250	1809	1554	4025	3637	3347	1456	4052	1927	3106	1688	1547	4358	7149	3477	2136	1738	1606	5172	1989	3068	3594	1921	1932	1842	1600	2348	7065	4133		1947	1976	1387	2171	4689	2085	2762	1119	5957	2023	1792	1838	1520	3115	6661	2891	1868	1990
125	2389	2508	1793	1514	4277	3501	3159	1290	4089	2053	2963	1949	1502	4330	6989	3166	2235	1608	1838	5338	2107	2985	3592	1866	1974	1724	1604	2245	7053	4732		2025	2418	1348	2203	5233	2073	2992	1048	5758	1978	1762	1829	1676	3228	6650	3151	2129	2104
126	2417	2590	1581	1457	4245	3347	3144	1386	4224	2090	3224	1643	1528	4303	6986	3182	2230	1626	1595	5466	1997	2809	3632	1819	1906	2082	1460	2448	6890	5214		2175	2130	1454	1945	4540	2156	2996	1023	6287	2020	1915	1867	1703	3152	6321	3224	2174	2502
127	2313	2733	1782	1489	4143	3259	3233	1364	3882	2004	3101	1748	1637	4113	6820	3270	2155	1840	1647	5556	2068	3113	3730	1885	1879	1739	1525	2405	7080	5222		2003	2293	1335	1990	5348	2055	2967	1129	6293	2135	1977	1781	1578	3204	6690	3056	2167	2281
128	2034	2618	1267	1421	4019	3549	3210	1420	3788	2115	3070	1745	1427	4236	7265	3472	2287	1629	1703	5435	1864	3120	3844	1977	2007	1904	1544	2208	7076	5167		2055	2019	1459	1954	4774	2061	2766	1253	6249	2127	1749	1737	1710	3133	6108	3132	2208	2132
129	2195	1946	1653	1376	4080	3263	3106	1294	3920	1951	3259	1736	1557	4175	7164	3303	2070	1765	1561	5198	2024	2911	3804	2104	1867	2021	1490	2310	6810	5010		1998	2403	1446	1898	5463	2280	2868	1209	5657	1950	1846	1936	1332	3176	6439	3147	2226	1960
130	2309	2653	1593	1535	4310	3976	3405	1111	3991	2032	3268	1901	1786	4102	7485	3380	2204	1616	1738	5436	1911	3210	3638	1805	1838	1882	1389	2248	7000	5119		2133	2518	1597	2163	4653	2376	3074	1107	5671	2001	1796	1783	1711	3072	6100	3251	2005	2421
131	2316	2602	1695	1517	4099	3296	3128	1228	3897	1885	3022	1824	1680	4026	6732	3505	2091	1830	1646	5224	1947	2968	3626	1834	1841	1953	1519	2447	7204	4440		2053	2233	1461	1870	4597	2082	3029	1031	5923	1885	2039	1948	1605	3364	6422	3315	2288	2111
132	2273	2448	1336	1403	4362	3718	3059	1175	3838	1899	3148	1718	1677	4135	7441	3503	2112	1596	1767	5238	1830	3242	3557	1838	1915	1965	1586	2369	6907	4355		2255	2187	1555	1977	4667	2163	2999	1024	6066	1890	1943	1887	1669	3208	6078	3198	2238	2437
133	2183	2708	1701	1331	4149	3461	3186	1146	4213	1977	2918	1943	1445	3999	7021	3448	2353	1751	1651	5114	2122	3171	3122	1968	1758	1945	1705	2349	6915	4064		2401	2533	1438	1905	4929	2303	3073	1039	5955	2190	1713	1884	1370	3125	6928	3514	2122	2426
134	2216	2377	1543	1363	4090	3309	2947	1147	3839	2021	3066	1694	1373	3807	7121	3397	2246	1692	1631	4856	2095	3197	3642	1947	1830	1950	1660	2422	7003	4754		2070	1993	1511	2058	4938	2182	3132	1124	5922	1882	2055	1894	1462	3323	6660	3217	2075	2545
135	2370	2548	1608	1414	4350	3448	3452	1266	3746	1715	3115	1877	1726	4010	7200	3247	2309	1578	1294	5230	1897	3268	3822	2018	1988	1931	1620	2326	6741	4885		2152	2459	1477	1885	4835	2307	3365	1112	5818	1878	1831	1864	1718	3151	6797	3161	2158	2465
136	2393	2445	1728	1345	4162	3236	3423	1347	3766	1964	3064	1668	1519	3871	6521	3418	2188	1802	1652	5338	1950	3065	3522	1911	1803	1790	1449	2155	7084	4155		2106	2394	1542	1857	4697	2259	3426	1210	6070	1945	2028	1916	1593	3063	7207	3443	2216	2143
137	2305	2488	1815	1474	4145	3324	3226	1106	3524	1836	3132	1836	1687	3765	7254	3325	2138	1751	1635	5091	2063	3190	3671	1901	1896	1984	1562	2277	7322	4117		2175	2310	1597	2062	5256	2230	3419	1308	5938	1863	2000	1804	1865	3222	6956	3302	2180	2677
138	2132	2459	1780	1401	4245	3335	3233	1359	3728	1824	3145	1727	1464	3575	7287	3349	2226	1815	1718	5219	1881	3104	3682	1869	1816	1836	1574	2411	6997	4330		2309	2214	1535	2189	5390	2499	3558	1223	6169	1978	1730	1730	1800	3293	6815	3329	2331	2124
139	2319	2425	1617	1327	4065	3414	3173	1357	3796	1843	3100	1960	1507	3897	7300	3481	2204	1564	1564	5050	1946	2966	3455	1968	1877	1906	1454	2354	6936	4484		2300	2540	1559	2104	5342	2276	3428	1082	6281	2028	1887	1911	1689	3411	6199	3358	2254	2647
140	2243	2278	1788	1432	4129	3528	3219	1511	3656	1961	3286	1888	1499	3562	7102	3124	2112	1642	1530	5091	2069	2963	3694	1929	1799	1929	1467	2445	6803	3833		2263	2500	1726	1939	5287	2223	3325	1209	6541	2086	2192	1796	1417	3414	7100	3494	2272	2115
141	2297	2303	1622	1348	3904	3344	3199	1251	3654	1847	3167	1747	1376	3782	7558	3597	2091	1769	1651	4964	1853	3081	3644	1786	1932	1971	1632	2292	6688	4500		2097	2749	1499	2148	4551	2303	3341	1053	6525	2059	1989	1995	1334	4227	6030	3559	2512	2538
142	2182	2300	1701	1366	3975	3460	3144	1236	3745	1853	3133	1956	1674	3890	7309	3340	2195	1750	1592	5003	1956	3233	3622	1923	1848	1885	1766	2248	6760	3872		2079	2494	1594	1965	5130	2279	3425	901	7136	1918	1958	1817	1528	4262	7081	3434	2268	2488
143	2279	2156	1633	1559	4037	3515	2912	1146	3825	1967	3209	1764	1581	3786	7386	3379	2239	1793	1549	5021	1949	3187	3460	1992	1680	2003	1405	2273	6985	4144		2218	2391	1694	2125	4510	2201	3506	1372	7130	1935	1910	1718	1482	3347	6586	3278	2277	2573
144	2316	2260	1803	1297	4047	3558	3266	1368	3717	1964	3260	1744	1788	3761	7160	3619	2292	1726	1508	5048	1747	2888	3594	1779	1850	1759	1561	2273	6822	3946		2243	2193	1555	2061	4329	2214	3544	1025	6861	1968	2047	2023	1487	3394	7153	3513	2211	2717
145	2279	2260	1555	1377	4166	3379	3228	1251	3843	1986	3084	1725	1381	3623	7491	3350	2227	1772	1534	4935	2044	3316	3526	1946	1614	1692	1546	2291	6763	3954		2180	2484	1642	2086	5323	2339	3655	1083	7092	2159	1863	1835	1391	3411	6206	3585	2351	2630
146	2372	2410	1794	1559	4275	3660	3492	1245	3977	2026	3098	1729	1698	3792	7251	3133	2114	1641	1638	4929	2020	2896	3598	1939	2007	1650	1360	2386	6961	3968		2323	2653	1704	2272	5327	2181	3691	996	6833	1892	1899	1819	1459	4394	6235	3304	2386	2544
147	2181	2247	1537	1392	3891	3804	3215	1311	4049	2111	2876	1817	1577	3604	7364	3492	2342	1773	1674	5195	1989	3054	3501	1805	1765	1871	1513	2353	6601	4272		2256	1919	1622	2057	4515	2254	3829	1328	6589	1811	2015	2016	1495	3405	6599	3616	2350	2118
148	2101	2105	1358	1392	4134	3635	3261	1367	3907	2027	2902	1728	1284	3606	7384	3854	2120	1620	1504	4864	1889	3000	3569	1816	1911	1682	1506	2400	6793	4481		2292	2514	1628	2060	5097	2235	3536	1055	6687	1930	2052	1903	1644	3460	6403	3238	2315	2613
149	2190	2344	1523	1446	4120	3821	3182	1211	3775	2147	3197	1662	1346	3530	7324	3516	2211	1726	1707	4817	2001	2889	3627	1836	1909	2209	1663	2405	6773	4106		2144	2397	1538	1977	5225	2380	3767	1076	6556	1929	2040	1891	1542	3450	6653	3476	2384	1998
150	2223	2322	1646	1428	3987	3515	3264	1401	3955	1890	3199	1383	1407	3562	6743	3452	2202	1701	1732	4841	1978	3156	3652	2074	1689	1958	1631	2136	6824	3861		2288	2033	1712	2134	4523	2577	3681	1205	7098	2121	2003	1922	1670	3624	6722	3700	2357	2472
151	2396	2389	1477	1457	3998	3748	3337	1241	3957	2104	2987	1733	1301	3422	6703	3443	2005	1693	1389	4811	2109	2997	3619	1932	2069	1800	1412	2161	6869	4075		2342	2660	1576	2105	4536	2383	3688	1049	6326	2015	2050	1928	1485	3825	6502	3328	2324	2132
152	2190	1701	1685	1356	4000	3650	3131	1282	3450	1941	3029	1813	1267	3460	7308	3462	1988	1731	1533	4911	2031	3003	3681	1888	2040	1881	1465	2291	6648	3776		2364	2682	1480	2117	5126	2243	3609	1037	6708	1925	2112	1736	1575	3547	5953	3339	2351	2599
153	2293	2138	1751	1491	4043	3686	3305	1218	3993	2085	3113	1869	1241	3438	7334	3274	2103	1786	1624	4631	1782	3149	3597	2027	1879	1826	1577	2398	6791	3869		2321	2439	1623	2119	5136	2255	3685	1111	6645	1928	2144	2152	1550	3913	6190	3643	2294	2324
154	2172	2335	1828	1363	4128	3578	3015	1181	3920	2097	3043	1727	1368	3666	6961	3586	2046	1757	1551	4826	2010	3023	3605	1791	1901	1914	1535	2221	6794	3871		2282	2517	1512	2015	5098	2443	3704	1316	6454	1945	1933	2004	1430	3873	7087	3555	2422	2707
155	2170	2164	1577	1345	3839	3610	3188	1278	3735	1959	3012	1905	1509	3476	7799	3337	2206	1561	1616	4594	1814	3008	3541	2041	1911	1917	1812	2110	6893	3679		2355	2403	1490	2188	4408	2331	3564	1086	6906	2031	1917	1919	1424	4760	6793	3543	2511	2136
156	2300	2089	1656	1321	4360	3857	3231	1149	3718	1839	3125	1591	1377	3475	7704	3390	1739	1735	1688	4786	1882	3113	3584	1973	1854	1953	1666	2527	7119	3909		2350	2399	1458	2144	5334	2303	3564	1063	6751	2145	2053	2106	1402	3557	6575	3347	2433	2067
157	2121	2080	1722	1347	4089	3518	3211	1312	3680	1993	3090	1887	1316	3345	7665	3296	2211	1818	1613	4759	1842	3038	3444	1833	1650	2141	1734	2334	7247	3890		2531	2055	1435	2184	4436	2230	3710	977	6869	1973	1974	2040	1547	3715	6947	3361	2607	2684
158	2166	2159	1735	1280	3938	3614	3225	1235	3898	1948	3075	1886	1583	3533	7208	3400	2035	1607	1483	4806	1968	3188	3531	2054	1833	1757	1533	2206	7588	3839		2451	2284	1619	2108	5087	2862	3666	1117	7131	1978	1838	1894	1610	3831	7207	3373	2357	2081
159	2297	2193	1803	1459	4159	3448	3181	1324	3858	2183	3103	1975	1575	3283	7641	3502	2095	1620	1736	4747	2019	3067	3767	1831	1983	1849	1587	2293	7142	3840		2476	2269	1563	1984	4978	2322	3691	895	7520	2080	2098	1857	1651	3970	7340	3412	2638	2173
160	2160	1508	1559	1429	4032	3742	3314	1297	3417	1874	2964	2103	1615	3276	7378	3681	2209	1720	1749	4971	1837	3069	3555	1990	1732	2031	1540	2378	7412	3747		2469	2123	1605	2118	5043	2718	3742	1162	7800	2059	2131	1823	1591	3690	6394	3416	2476	2080
161	2286	2254	1795	1306	4152	3711	3225	1208	3771	1863	3097	1617	1593	3169	7501	3516	2121	1531	1611	4760	1708	3046	3456	1845	1891	1930	1680	2282	7138	3953		2325	2531	1758	2317	4950	2884	3678	1410	7570	2166	2098	1721	1434	3810	7582	3630	2667	2490
162	2181	1772	1753	1467	4115	3662	3192	1221	3738	1945	2931	1716	1552	3331	7411	3473	1995	1642	1593	4955	2002	3110	3496	1956	1985	1944	1545	2322	7000	3657		2545	1584	1536	2209	4947	2804	3529	1116	7646	2021	2065	1793	1517	3718	7115	3553	2407	2650
163	2340	2125	1633	1449	3844	3651	3101	1388	3766	1941	2990	1828	1562	3319	6709	3761	2098	1783	1570	4677	1983	3128	3556	1889	1765	2079	1398	2351	7061	3912		2411	2623	1502	2058	5084	2306	3681	1146	7507	2090	2275	1796	1646	3685	7059	3493	2310	2638
164	2319	2242	1658	1472	4346	3379	3379	1255	3782	1883	3137	1934	1616	3280	7675	3421	2122	1781	1747	4668	2060	3058	3724	2024	1928	1792	1672	2261	7105	3942		2473	2705	1780	2292	4310	2322	3820	1135	7671	2169	2034	1823	1626	3325	6907	3608	2338	2518
165	2341	1806	1614	1528	4068	3556	3348	1373	3865	2097	3051	2064	1499	3447	7546	3569	2160	1584	1805	4597	1953	3025	3487	1697	1784	2008	1622	2388	6940	4106		2535	2197	1578	2515	5053	2338	3707	1274	7327	1989	1924	1946	1661	3632	6896	3448	2348	2209
166	2382	2123	1616	1357	4008	3516	3374	1308	4021	1908	2995	1678	1537	3251	7506	3307	2123	1700	1691	4636	2120	3075	3608	1953	1906	1855	1578	2074	7211	4253		2416	2666	1651	2284	5009	2230	3569	1212	7065	2158	1955	1806	1561	3644	7121	3529	2277	2730
167	2102	2054	1707	1605	4257	3797	3083	1396	4045	2069	3178	1809	1531	3213	7450	3234	2054	1605	1674	4792	1785	3185	3669	1807	1906	1848	1672	2195	6920	4090		2282	2576	1565	2375	5090	2388	3825	1016	7734	1952	1628	2007	1562	3765	6882	3401	2173	2589
168	2297	2139	1814	1359	4099	3793	3219	1279	3869	1915	3010	1703	1455	3236	7505	3566	1957	1805	1533	4717	1850	3190	3623	1844	1750	2080	1560	2386	7020	3782		2446	2232	1637	2227	5163	2187	3510	1023	7399	1959	2016	1975	1537	3573	7208	3903	2163	2724
169	2181	2172	1612	1481	3893	3771	3416	1331	3765	2043	3261	1847	1412	3276	7534	3594	2151	1726	1627	4781	1904	3145	3519	1868	1968	1778	1736	2436	7225	4381		2271	2783	1455	2305	5308	2327	3697	1155	7388	1935	2086	2103	1523	3432	7074	3777	2406	2779
170	2331	2049	1776	1805	3973	3599	3152	1147	3675	1962	3106	1866	1538	3506	7449	3328	2049	1688	1611	4836	1978	2957	3766	2264	2103	1911	1817	2078	6962	3999		2340	2752	1490	2164	5390	2626	3696	1400	7470	1977	2147	1677	1636	3841	7119	3435	2254	2654
171	2219	2148	1799	1487	4062	3591	3346	1220	3906	2101	3040	1907	1511	3319	7557	3386	2067	1703	1628	4839	1923	2799	3624	2019	1860	1885	1618	2287	6738	3831		2413	2765	1484	2297	5241	2346	3925	1258	7683	2096	1940	2051	1448	3774	6819	3505	2240	2690
172	2097	2125	1697	1440	3844	3742	3202	1272	3803	1831	2793	1897	1456	3257	7286	3413	2211	1665	1711	4688	2080	3106	3630	1831	1795	1933	1552	2287	7031	4085		2132	2924	1506	2299	5348	2593	3522	936	7960	2061	2140	1858	1436	3613	6296	3539	2345	2729
173	2191	2343	1725	1571	3901	3932	3221	1242	3342	1961	3167	1900	1348	3372	7427	3349	2167	1577	1638	4767	1961	3081	3720	1954	1788	1908	1554	2126	7060	4247		2502	2757	1644	2204	5418	2392	3500	1177	7806	1951	2087	1982	1504	3611	7359	3644	2349	2329
174	2204	1930	1624	1330	3978	3517	3274	1103	3825	1977	2946	1846	1545	3333	7411	3506	2268	1644	1680	4798	1938	3130	3669	1832	1614	1663	1616	2406	7002	3779		2311	2566	1625	1922	5267	2646	3564	1056	7833	1945	2089	1825	1400	3702	7403	3665	2254	2586
175	1998	2031	1661	1371	3992	3611	3263	1260	3559	2074	3255	1737	1576	3318	7672	3301	2196	1785	1568	4761	2070	3133	3329	1846	1728	1827	1569	1954	6883	3986		2392	2754	1500	1921	5331	2413	3307	1015	8236	2064	2155	1879	1582	3950	7236	3455	2164	2686
176	2185	1611	1643	1218	3942	3372	3045	1371	3987	2046	3385	1884	1803	3243	7453	3593	2252	1701	1622	4832	1940	2947	3297	2043	3106	1923	1689	2146	6891	4296		2416	2810	1517	2042	5266	2291	3233	1102	8200	2145	2061	1875	1460	3914	7621	3561	1970	2649
177	2280	1933	1804	1493	4064	3528	3287	1154	3833	2069	3383	1792	1394	3311	7709	3360	2006	1821	1639	4638	1816	2884	3307	1905	1786	1864	1558	2303	6683	4029		2369	2698	1714	2050	5318	2656	3396	1236	8115	1957	2077	1920	1533	3817	7141	3631	2474	2485
178	2109	1955	1791	1384	4016	3828	3016	1331	3928	2140	3270	1720	1520	3481	7679	3506	2059	1818	1692	4836	1961	2923	3227	1896	1849	1895	1619	2179	6960	3864		2783	2792	1672	2033	5726	2411	3467	1285	7897	2004	2364	2034	1529	3826	6994	3774	2377	2765
179	2273	2094	1806	1463	3742	3518	3343	1390	3267	2055	3494	1724	1655	3080	7355	3536	2243	1429	1593	4836	1931	3119	3359	2014	1714	1793	1355	2343	6774	3801		2740	2629	1549	2038	5886	2272	3513	1187	7704	2012	2197	2179	1468	3959	7220	3903	2334	2636
180	2313	2110	1675	1437	3952	3883	3174	1264	3895	2056	3166	1872	1360	3197	7571	3253	2240	1617	1636	4643	2079	2910	3260	1868	1883	1844	1891	2255	6792	3746		2431	2603	1698	2190	5865	2321	3215	1088	7629	1910	2161	1989	1431	4209	6949	3694	2639	2132
181	2298	2273	1502	1367	3917	3252	3474	1148	3923	2117	3103	1841	1508	3368	6961	3330	2185	1705	1447	4755	2021	3150	3320	1983	2816	1687	1707	2359	6879	3561		2455	2658	1653	2237	5193	2222	3454	1199	7584	1941	2157	2235	1581	3841	6772	4021	2604	2475
182	2129	2396	1558	1342	4039	3230	3290	1359	3856	1970	3117	1733	1591	3362	7436	3456	2141	1378	1632	4620	1817	2893	3538	1752	1796	1798	1703	2421	6937	3813		2595	2744	1549	2171	5923	2354	3710	1231	8076	1856	2191	2013	1764	5173	6569	4047	2669	2179
183	2148	2559	1624	1320	3944	3385	3224	1234	3620	2130	3012	1859	1767	3595	7630	3681	2195	1561	1616	4547	2005	2934	3374	1724	1980	1770	1632	2139	6676	4385		2451	2710	1567	2090	6073	2404	3887	1198	7499	1939	1753	2121	1503	4019	6662	3787	2679	2559
184	2039	2457	1582	1381	4006	3378	3520	1350	3144	1991	3225	1739	1010	3435	7438	3523	2258	1210	1827	4657	2213	3235	3487	1814	1878	1992	1684	2398	6666	4006		2669	2647	1588	1928	5810	2166	3967	1252	7687	1886	2224	2038	1492	4205	7534	3912	2744	2060
185	2074	2511	1559	1370	3796	3419	3129	1213	3835	2112	3192	1541	1650	3931	6869	3403	2241	1752	1606	4507	1798	2943	3586	1975	1858	1842	1627	2169	6655	3751		2580	1971	1632	2008	5110	2251	4035	964	7462	2100	2129	2146	1606	4569	7167	3422	2825	2600
186	2081	2437	1813	1435	3675	3278	3153	1312	3972	2112	3266	1853	1452	4074	7485	3417	2112	1761	1656	4626	1932	2987	3297	1710	1785	2045	1633	2193	6689	4065		2542	2698	1607	2169	5980	2855	3634	1159	7758	2070	2157	2120	1471	4511	6987	3653	2746	2532
187	2105	2411	1700	1396	3898	3187	3342	1235	4013	1696	3177	1818	1658	4040	7314	3536	2362	1651	1481	4620	1810	3126	3693	1937	1870	2185	1506	1957	6905	4367		2655	2857	1614	2285	5539	2235	3817	1358	8600	1889	2142	2252	1482	4698	7053	3814	2375	2519
188	2240	2421	1566	1430	4049	3545	3470	1341	3929	1976	3034	1916	1316	3961	7379	3436	2290	1590	1704	4611	1936	3135	3498	1978	1743	1915	1526	2208	6945	3965		2343	2712	1614	2125	5691	2161	3585	1059	8225	2119	2041	1733	1512	4524	7059	3521	2305	2914
189	2243	1766	1740	1490	4013	3306	3304	1280	3242	1802	3165	1905	1615	3851	7256	3576	2153	1636	1377	4601	2046	3120	3453	2166	1847	2199	1900	2410	6608	3855		2473	2655	1699	2218	5625	2379	3618	1154	7820	1938	2197	1982	1494	4617	7181	3695	2329	2272
190	2045	2340	1702	1437	4030	3072	3158	1484	3807	1878	3200	1582	1627	3736	7260	3429	2217	1812	1485	4399	2007	3247	3632	1764	1639	2006	1625	2164	7013	4321		2534	2799	1580	2227	5413	2344	3712	1080	7891	1961	1973	2182	1526	4323	6846	3954	2492	2883
191	2246	1847	1689	1419	3843	3178	3257	1253	3808	1866	3247	1821	1595	3710	7411	3698	2077	1649	1618	4553	1917	3027	3452	1839	1805	2039	1745	2548	6945	3881		2557	2742	1571	2186	5692	2420	3564	1209	7639	1985	2096	2052	1490	4359	7176	3820	2683	2592
192	2284	2411	1487	1413	3692	3178	3343	1365	3607	2043	3175	1848	1354	3736	7447	3532	2124	1663	1539	4535	2036	3191	3503	1864	1868	2035	1635	2300	6989	3886		2597	2555	1926	2231	5993	2461	3428	1301	7902	2185	2122	1890	1555	4378	7082	3868	2734	2994
193	2128	2267	1645	1549	3982	3302	3245	1201	3692	2182	3237	1869	1397	3717	7409	3455	2198	1679	1629	4652	2006	2960	3614	1959	1811	2124	1531	2195	7004	3812		2526	2591	1805	2245	5868	2290	3620	1162	8203	1971	2009	2116	1543	4391	7120	3827	2583	2652
194	2105	2261	1588	1438	3953	3261	3093	1258	3622	1764	2959	1770	1575	3416	7456	3338	2391	1709	1728	4510	1859	3025	3578	2306	1715	2091	1668	2535	7012	4269		2601	2085	1685	2212	6120	2365	3914	1344	7988	2079	2113	1913	1643	5623	6800	3850	2236	2937
195	2286	2264	1675	1314	4048	3187	3485	1327	3655	2109	3297	1665	1770	3580	7346	3153	2276	1680	1696	4711	1914	3016	3431	1896	1853	1860	1662	2118	6553	3900		2522	2671	1657	2322	6010	2105	3763	1080	8161	2107	2181	2115	1487	5729	6955	3993	2698	2720
196	2220	2229	1760	1316	4014	3127	3338	1248	3502	2010	3225	1878	1327	3588	7554	3585	2293	1531	1535	4560	1895	3054	3636	1901	1937	1840	1797	2288	6732	3837		2653	1640	1774	2205	6118	2260	4005	1245	8443	2163	2153	1879	1495	4524	7014	3650	2446	2695
197	2326	2159	1607	1317	3840	3126	3314	1207	3529	1854	3094	1837	1449	3544	7404	3463	2280	1657	1557	4509	2235	3032	3281	2007	2977	1896	1760	2352	6621	4170		2273	2033	1515	2111	6153	2704	4010	1094	8107	2140	2025	2008	1570	4197	7058	3915	2363	2563
198	2149	2222	1625	1368	4054	3285	3468	1398	3521	1900	3003	1757	1464	3602	7900	3625	2131	1700	1406	4538	1742	2827	3313	1752	2020	1756	1518	2354	6909	4144		2691	1604	1637	2097	6237	2409	3894	1294	8186	2074	1925	1954	1349	4255	7269	3724	2316	1959
199	2336	1751	1613	1436	3864	3185	3301	1155	3762	1742	3359	1567	1259	3567	8170	3319	2258	1813	1642	4579	1887	3000	3679	2027	2053	1889	1689	2194	6550	3849		2685	2772	1659	2285	6108	2876	3863	1192	7932	2076	2039	1976	1500	4546	7690	4055	2386	2797
200	2296	2202	1675	1374	3765	3087	3327	1288	3876	2027	3207	1648	1370	3592	7699	3561	2303	1733	1667	4481	2338	3254	3937	1904	1917	1818	1531	2327	6733	3749		2689	2876	1744	2165	5972	2439	3864	1554	7736	2300	2071	2144	1636	4517	8135	4112	2726	2945
201	2322	1685	1617	1687	3730	3212	3265	1241	4037	1911	3281	1782	1556	3527	7758	3610	1977	1836	1542	4410	1863	2972	3629	1875	1751	1991	1598	2339	6829	4129		2715	2568	1682	2237	5914	2507	4092	1411	7746	2011	2078	1937	1594	4477	8071	4067	2748	2522
202	2204	1726	1719	1477	3927	3169	3361	1156	3537	2008	3412	1843	1394	3371	7933	3763	2072	1862	1602	4813	2280	3106	3725	1729	1996	1865	1726	2383	6804	3776		2927	2554	1743	2102	5969	2375	4157	1402	7653	2018	1915	1775	1586	4517	8031	3903	2861	2053
203	1993	2163	1787	1381	3813	3402	3251	1301	3478	1954	3287	1678	1405	3342	7517	3217	2068	1503	1672	4466	2198	2963	3585	1881	1867	1789	1641	2251	6655	3650		2775	2057	1630	2175	5815	2589	4193	1340	7609	1980	2227	1903	1509	4205	8119	4157	2820	2689
204	2356	2327	1588	1469	3693	3234	2975	1230	3670	2218	3160	1835	1420	3321	7644	3105	2009	1864	1671	4558	1776	2916	3536	2051	2828	1968	1825	2232	6729	3624		3128	2585	1645	2164	5706	2412	4113	1077	7875	2099	1734	1894	1653	4624	7829	4216	2727	2673
205	2197	2108	1719	1474	3859	3125	3309	1248	3503	1958	3149	1935	1294	3267	7697	3506	2108	1743	1599	4625	2252	3027	3763	1970	1969	1907	1621	2370	6809	3627		2566	2889	1649	2198	5848	2992	4059	1236	7575	2011	2303	1999	1514	4830	8128	3859	2624	2611
206	2051	1778	1780	1534	3912	3319	3359	1192	3722	2220	3138	1827	1512	3059	7348	3419	2283	1703	1600	4309	1902	2908	3532	1832	1845	2045	1677	2154	6696	3674		2990	2445	1706	2289	6122	2525	4140	1428	7708	2201	1908	1954	1582	4870	7855	4017	3087	2843
207	2244	2241	1640	1415	3703	3121	3201	1436	3398	1999	3210	1777	1371	3488	7623	3581	2128	1718	1595	4620	2315	3057	3645	1976	1951	1894	1858	2503	6948	4066		2817	2813	1535	2258	5722	2962	3987	1137	7697	2132	2133	2133	1698	4437	8193	4007	3041	2083
208	2143	2086	1689	1393	3769	3199	3347	1189	3472	2145	3265	1954	1517	3207	7652	3472	2146	1666	1550	4286	2234	3120	3675	2070	1937	1886	1707	2208	6957	3631		2623	2726	1670	2027	5778	2544	3879	1392	7425	2473	2020	2114	1559	4825	6809	4265	3027	2760
209	1924	2197	1626	1580	3939	3158	3059	1110	3339	1946	3070	1745	1407	3367	7565	3539	2017	1517	1863	4639	2243	2996	3783	1999	1990	1775	1780	2359	6657	3757		3009	2771	1598	2087	5953	2454	3697	1425	7754	2220	2179	2051	1587	4687	7828	4072	3112	2642
210	2112	2259	1646	1486	3822	3244	3307	1348	3576	1776	3107	1798	1516	3349	7717	3432	2124	1701	1545	4350	2370	2977	3481	1981	3030	1847	1746	2400	6833	3852		3048	2096	1783	1846	6096	2389	3737	1394	7645	2127	2006	2108	1574	4724	7655	4200	2844	2589
211	2190	2229	1742	1309	3784	3038	3256	1194	3443	1769	3197	1745	1537	3240	7689	3369	2223	1767	1662	4514	2171	3004	3681	1817	1990	1833	1650	2516	6891	4097		2930	2442	1682	2180	6533	2732	3801	1501	7217	2188	2013	1958	1510	4572	7763	4037	3105	2656
212	2216	2303	1666	1740	3602	3106	3238	1403	3348	2099	3214	1815	1592	3374	7620	3581	2043	1663	1540	4149	2262	3048	3439	1804	2029	2032	1617	2340	6829	4120		2915	2763	1697	1926	6469	2501	3841	1407	7367	2236	2108	2015	1695	5010	7667	4300	2954	3002
213	2322	2136	1761	1352	3777	3051	2951	1274	3381	2118	3242	1757	1462	3147	7664	3469	2092	1588	1546	4269	2291	3005	3573	2031	1968	1872	1888	2369	7032	4062		2725	2318	1540	2043	6602	2153	3884	1444	7295	2045	1934	1971	1486	4777	7353	4320	2373	2671
214	1958	2333	1636	1543	3731	3022	3339	1311	3042	2032	3398	1561	1498	3383	7331	3363	2145	1772	1623	4375	2323	3298	3762	1990	2028	1927	1709	2512	7223	3869		2846	2774	1648	2317	6744	2472	3484	1449	7046	2229	1842	2047	1563	4733	7107	4402	2672	2700
215	2296	2184	1746	1620	3616	3159	3205	1418	3416	1926	3110	1747	1465	3217	7587	3739	2034	1206	1719	4456	2028	3049	3213	2093	1846	1921	1636	2342	6996	3726		2841	2822	1632	2084	6401	2525	3232	1480	6871	2068	1909	2058	1511	4559	7057	4504	2567	2116
216	2231	2075	1662	1528	3850	3075	3282	1319	3226	1780	3350	1683	1580	2941	7530	3420	1997	1696	1546	4412	1967	3055	3392	1923	3139	2011	1630	2259	6710	4207		2842	2718	1568	2125	6159	2925	3451	1460	7070	1826	1928	2003	1690	4471	6860	4669	2879	2893
217	2208	2320	1647	1412	3771	3220	3081	1371	3459	1994	3183	1770	1556	3115	7234	3644	2130	1815	1600	4484	1962	3060	3693	2075	2089	2194	1605	2158	6691	3813		2761	2497	1604	2105	6396	2376	3526	1375	7150	2031	1891	1895	1737	4430	6652	4672	3193	2509
218	2217	2177	1625	1350	3709	2946	2948	1286	3098	2157	3197	1715	1449	3151	7765	3403	1955	1596	1688	4616	2060	3242	3611	2117	1968	1813	1629	2577	6933	4237		2795	2774	1645	2087	6018	2524	3512	1187	6852	1861	1799	1759	1361	5355	7907	4654	2534	2357
219	2208	1660	1602	1435	3940	3161	3335	1333	3168	2022	3195	1633	1399	3073	7246	3276	2201	1790	1625	4017	1885	2984	3723	1977	1863	1998	1654	2409	6755	4323		2655	2715	1532	2136	6197	2930	3480	1023	6771	2214	1818	1912	1677	4514	7548	4798	2938	2458
220	2098	2117	1740	1420	3662	3145	3091	1511	3648	2263	3340	1611	1516	3113	7517	3071	2084	1743	1626	4321	2019	2932	3737	1821	2012	1833	1567	2359	7121	4251		2698	2441	1645	1881	5950	2342	3471	1173	6757	2402	1852	1980	1517	4362	7774	4664	2589	2593
221	2173	2146	1705	1448	3997	3091	3038	1284	3470	2212	3221	1817	1414	3317	7285	3407	2093	1792	1434	4378	1809	3087	4097	2048	2912	2184	1628	2302	6842	4356		2608	2570	1532	2081	5902	2222	3202	1322	6539	2121	1912	2112	1618	4482	7763	4669	2948	2638
222	2280	2317	1723	1490	3791	3268	3177	1229	3723	1988	3218	1750	1451	3425	7554	3561	2015	1463	1680	4316	1971	3050	3314	1952	1939	1748	1672	2385	6889	4064		2614	2761	1612	1946	6219	2337	3750	1221	6745	2148	1847	1874	1466	3725	7511	4416	2414	2680
223	2208	2050	1611	1479	3623	3126	3087	1252	3615	2274	3219	1891	1271	3192	7400	3460	2088	1545	1692	4336	1865	3087	3406	1939	1895	1813	1759	2246	6643	4229		2543	2597	1732	2010	5946	2408	3398	1130	6695	2067	1769	1801	1629	4479	7861	4351	2784	2899
224	2192	2027	1750	1606	3738	3075	3033	1298	3665	2098	3107	1726	1544	3108	7286	3465	2135	1728	1761	4359	2183	3194	3286	1972	1899	1684	1723	2254	7183	4589		2748	2537	1598	1983	5841	2447	3680	1212	6496	2083	1807	1832	1502	4587	7661	4413	2811	2773
225	2083	2157	1776	1431	3765	2996	3137	1337	3582	2003	3203	1626	1604	3044	7602	3488	1998	1840	1880	4331	1975	3104	3302	2080	2005	1986	1790	2312	6777	4217		2515	2478	1564	2110	6055	2366	3307	1454	6594	2020	1751	1892	1461	3848	7798	4184	2290	2303
226	2288	1996	1727	1398	3627	3035	3354	1257	3438	2208	3322	1842	1430	3283	7516	3487	2193	1557	1724	4349	2079	2953	3188	2033	2916	2019	1842	2373	7141	4193		2511	2477	1452	2062	5537	2422	3247	1194	6386	1906	1892	1702	1522	4108	7733	4158	2804	2692
227	2199	2104	1827	1599	3910	3148	2866	1170	3386	2040	3276	1745	1508	3041	7697	3396	2301	1375	1686	4322	2334	3267	3422	2054	2501	1846	1650	2405	7262	4199		2501	2699	1690	2102	5797	2283	3334	1060	6319	2017	1670	1972	1414	4426	7587	4113	2757	2730
228	2130	2106	1608	1571	3592	2991	3279	1284	3454	1990	3264	1898	1450	3192	7545	3481	2298	1703	1493	4270	2239	3029	4047	2197	2887	1736	1622	2403	6811	4037		2545	2485	1514	2117	5789	2391	3622	1256	6446	2293	1837	1878	1478	4372	7309	4189	2362	2746
229	2170	1934	1761	1379	3526	3126	3359	1351	3580	1973	3178	1840	1444	3060	7700	3550	2246	1830	1713	4459	2139	3059	3307	1833	2952	1813	1921	2289	7371	3905		2479	2452	1484	2105	5537	2400	3436	1152	5965	2276	1735	1704	1547	4188	7576	4362	2841	2392
230	2071	2022	1569	1418	3578	3047	3414	1231	3553	1877	3168	1725	1457	3183	7515	3664	2256	1700	1784	4360	2109	2974	3436	2168	2447	1913	1817	2305	6830	4178		2482	2591	1646	2086	5830	2379	3325	1091	6152	2024	1839	1825	1582	4245	7278	4582	2759	2354
231	2180	1781	1424	1426	3933	3096	3077	1192	3547	1994	3177	1660	1598	2810	7571	3424	2234	1332	1416	4454	2190	2872	3443	1945	2891	1862	1810	2353	6880	3897		2436	2571	1572	2146	5529	2555	3245	1449	6209	2275	1582	1794	1716	4218	7350	4204	2718	2419
232	2249	2122	1721	1661	3906	3087	3191	1173	3677	1802	3361	1567	1446	3146	7823	3805	2162	1777	1545	4355	2183	3056	3148	2094	2990	2006	1683	2417	7120	3933		2490	2624	1598	2362	5381	2394	3571	1156	5916	2024	1602	1853	1535	4073	7332	4460	2134	2746
233	2301	2007	1721	1472	3566	2954	3297	1337	3373	1698	3467	1770	1522	3104	7925	3372	2028	1663	1739	4358	2105	2936	3443	1808	3017	2028	1758	2467	7651	4491		2460	2643	1655	2378	5587	2453	3427	1355	6065	2207	1473	1747	1568	3657	7730	4047	2621	2406
234	2154	2228	1747	1490	3859	2914	3304	1351	3579	2010	3139	1704	1337	2992	8054	3601	2214	1600	1723	4313	2126	3046	3834	2030	3130	2240	1742	2235	6979	3870		2376	2571	1547	2512	5596	2383	3498	1330	6043	1945	1700	1542	1590	3214	7214	4182	2330	2451
235	2333	2162	1673	1509	3583	2883	3139	1505	3559	1565	3254	1595	1465	3062	8049	3503	1970	1714	1697	4512	2160	2905	3374	1946	1996	2118	1579	2126	7552	4095		2333	2407	1461	2448	5574	2417	3360	1206	5861	2058	1684	1786	1474	4202	7698	3999	2994	2500
236	2108	2087	1737	1421	3890	3016	3282	1305	3423	1901	3366	1730	1790	3086	8069	3387	1991	1761	1570	4450	2070	2887	3424	2045	1508	2214	1855	2048	7425	4636		2258	2532	1507	2104	5364	2346	3055	1122	5942	2149	1623	1774	1486	4199	7378	4043	2639	2587
237	2084	1754	1693	1428	3643	2852	3186	1254	3373	1776	2945	1831	1382	2977	8111	3490	2078	1875	1792	4327	2082	2966	3576	2072	1955	2131	1671	2296	7448	4056		2401	2277	1506	2343	5604	2271	3427	1347	5537	1989	1635	1775	1427	4010	6972	3963	2239	2591
238	2018	2209	1622	1523	3528	2889	3380	1319	3609	1969	2964	1746	1299	2785	7969	3326	2091	1674	1681	4504	2106	3141	3221	2139	1813	1962	1642	2039	7399	4028		2202	2676	1474	2250	4699	2219	3060	1144	5658	2170	1546	1790	1518	4310	7015	3969	2566	2403
239	2416	2094	1559	1404	3562	3014	3111	1201	3503	1865	3071	1811	1360	3002	8126	3643	2103	1784	1691	4364	2260	2850	3447	2035	2042	1965	1273	2473	7932	4020		2224	2551	1636	2274	5302	2451	3111	1265	5862	2101	1666	1888	1573	3879	7039	4074	2728	2607
240	1962	2117	1683	1424	3593	2921	3056	1305	3369	1810	3071	1624	1595	2914	8503	3528	1950	1688	1689	4220	2031	2909	3707	1994	1931	2140	1841	2257	7582	4086		2488	2559	1524	2424	5395	2763	3257	1345	5880	2270	1630	1658	1489	4265	6921	4160	2593	2837
241	2127	2188	1732	1589	3720	2912	3173	1281	3490	2190	2830	1776	1373	3129	8472	3520	1896	1683	1601	4640	2133	3112	4148	2015	1973	2094	1811	2458	7089	3855		2315	2581	1743	2356	5392	2460	3142	1042	5759	2077	1587	1671	1627	4044	6681	3973	2409	2455
242	2136	2252	1698	1302	3793	2828	3081	1179	3466	1957	3067	1698	1512	3167	8048	3621	1997	1723	1530	4209	2261	3059	4057	1993	1580	1924	1615	2299	7447	3759		2304	2434	1543	2607	5512	2760	3441	1244	5632	1978	1548	1547	1660	4037	6861	3831	2473	2354
243	2203	2183	1743	1360	3566	2864	3318	1117	3526	1926	2885	1867	1456	3367	8550	3498	2131	1698	1719	4350	2043	2970	3805	2145	1526	1900	1713	2318	6921	3972		2250	2453	1683	2184	5548	2186	3284	1368	5558	2035	1659	1563	1564	4226	7002	4224	2451	2199
244	2303	2073	1735	1457	3734	2756	3140	1351	3460	2142	3165	1779	1287	3604	8348	3655	2021	1442	1501	4454	2213	3211	3055	2113	1355	2282	1608	2250	7009	3944		2129	2726	1474	2247	5431	2377	2885	1082	5855	2060	1541	1693	1642	4216	7401	3972	2656	2021
245	2213	1545	1671	1273	3638	3155	3241	1209	3563	2049	3054	1759	1701	3411	8153	3545	2133	1780	1855	4374	2106	3136	3872	1842	1534	1884	1651	2433	7021	3744		2396	2491	1427	2020	5169	2734	3212	1274	5786	1869	1676	1835	1566	3947	6504	3805	2540	2368
246	2240	2062	1767	1508	3808	2765	3166	1279	3601	2084	2938	1644	1496	3398	7818	3274	2196	1587	1566	4052	2217	3011	3940	1831	1397	2176	1793	2420	7326	3912		2129	2353	1547	2033	5316	2491	3266	1205	5700	2146	1574	1828	1503	3983	6446	4077	2512	2335
247	2258	1959	1514	1353	3522	3031	3277	1243	3534	2043	3096	1836	1509	3423	7980	3808	1958	1877	1370	4214	2075	3138	3883	2164	1663	1808	1670	2294	7461	4161		2299	2455	1492	2033	5147	2495	3223	897	5432	1817	1711	1461	1446	4048	6541	3833	2451	2456
248	2206	1535	1842	1434	3879	2963	3129	1255	3411	2118	2863	1776	1683	3534	8005	3698	2068	1664	1719	4211	2153	3209	4017	2016	1849	1964	1776	2275	7726	3819		2401	2709	1551	2103	5004	2480	3084	1255	5365	1875	1532	1774	1602	3800	6264	3848	2388	2637
249	2130	1845	1738	1294	3669	2793	3305	1237	3410	2086	3068	1947	1523	3419	7593	3464	2062	1649	1786	4367	2034	2887	4110	2114	1811	1893	1918	2279	7735	3867		2396	2028	1458	2141	5570	2474	2862	1213	5605	2042	1771	1590	1678	4004	6401	3879	2486	2459
250	2264	1489	1682	1335	3864	2786	3027	1404	3550	2034	3031	1774	1529	3402	7960	3532	2098	1513	1583	4245	2024	2960	3908	2093	1281	1806	1785	2272	7454	3871		2423	2498	1515	2248	4590	2241	3061	989	5302	1974	1619	1521	1628	3891	6340	4083	2016	2565
251	2160	2012	1624	1242	3687	2695	3201	1266	3597	2014	2872	1742	1573	3447	7580	3434	2104	1697	1523	4152	2009	2981	3924	2002	1397	2009	1877	2408	7613	3750		2221	1475	1540	2320	4428	2291	2971	1328	5581	2159	1687	1578	1512	4084	6347	4070	2486	2646
252	2253	2099	1658	1445	3572	2857	3049	1321	3721	2067	3206	1670	1665	3451	7537	3581	2216	1823	1521	4076	2244	3107	4077	1804	1837	1995	1525	2557	8088	4354		2124	2459	1452	2172	5159	2286	3116	1392	5572	2013	1690	1656	1562	3445	6105	3750	2092	2416
253	2241	1896	1689	1421	3667	2803	3219	1335	3613	2100	2939	1941	1426	3339	7550	3451	2115	1793	1622	4316	2230	2810	4030	2083	2940	2007	1789	2206	7950	3973		2311	2521	1507	2240	5161	2455	2767	1343	5608	1970	1629	1672	1780	3851	6133	3803	2327	2819
254	1884	1549	1667	1285	3713	3025	3164	1342	3616	1787	3006	1741	1410	3552	7422	3816	2176	1691	1703	4072	2058	2956	4008	2059	1971	2001	1721	2582	7776	4232		2358	2406	1553	2219	5144	2509	3239	1085	5370	1932	1685	1761	1563	3592	5437	4055	2566	2125
255	2280	1540	1718	1246	3602	2974	2964	1304	3538	1909	3021	1910	1456	3387	7354	3496	2121	1754	1510	4107	2216	3141	3801	1919	1477	2077	1764	2425	7788	3637		2221	2648	1565	2396	5326	2510	3051	1271	5561	2010	1616	1548	1537	3971	6387	3944	2219	2701
256	2135	1927	1601	1453	3536	2905	3272	1191	3252	1922	3077	1794	1292	3182	7236	3338	2063	1657	1522	4328	2133	3195	3840	2061	1409	1754	1872	2339	7622	3823		2188	2564	1485	2558	5199	2339	3101	1151	5268	1977	1621	1683	1735	3933	6276	3743	2462	2210
257	2126	2038	1625	1390	3656	2964	3199	1339	3791	1863	3304	1638	1235	3393	8222	3673	2127	1685	1649	4200	2068	3166	3702	2071	1944	1682	1698	2260	8177	3624		2196	2526	1545	2478	4964	2291	3288	1105	5172	2154	1574	1598	1695	3939	6297	3884	2475	2561
258	2237	1527	1729	1417	3754	2836	3115	1312	3614	1857	3205	1703	1657	3119	8218	3551	2089	1408	1426	4148	1918	3053	3862	1985	1846	1923	1669	2422	7736	3801		2038	2540	1431	2336	5172	2336	2986	1424	5158	2150	1625	1406	1567	3839	6206	3691	2625	2538
259	2301	1933	1635	1445	3672	2834	2976	1209	3428	1837	3244	1915	1676	3271	8290	3360	2265	1695	1611	3987	2183	2901	3825	2172	2007	1800	1853	2170	7759	3659		2297	2545	1572	2315	5044	2160	2940	1202	5200	2106	1641	1648	1807	3842	5737	3602	2233	2305
260	2108	2119	1579	1406	3711	2631	3132	1278	3389	1953	3327	1855	1707	3431	8219	3524	2127	1731	1556	4290	1991	3227	3628	2037	2039	2032	1698	2438	7774	3834		2219	2574	1617	2274	5075	2222	2927	1223	5284	2013	1843	1653	1658	3841	5432	3671	1990	2355
261	2163	1944	1620	1444	3809	2760	3273	1213	3362	2134	2879	1665	1753	3304	8050	3480	2054	1655	1734	4458	1955	2879	3698	1944	2661	1856	1739	2111	7632	3791		2452	2478	1420	2150	5046	2242	3258	1417	5029	2126	1523	1663	1608	3908	5969	3826	2200	2664
262	2413	1578	1635	1358	3750	2718	3079	1250	3584	2220	3174	1729	1545	3172	7510	3264	2077	1644	1617	4415	2028	2936	3578	1921	2921	1889	1803	2405	8353	3941		2472	2532	1463	2226	4632	2275	3017	1252	4887	1844	1653	1720	1677	3168	5477	4115	2412	2795
263	2238	1971	1612	1470	3708	2946	2943	1355	3457	2105	3343	1848	1561	3246	7763	3599	2140	1824	1590	4118	1962	3013	3637	1825	2841	2027	1769	2301	7850	4006		2434	2203	1538	2163	5081	2012	3006	1175	4982	1853	1661	1514	1623	4129	5926	4124	2447	2745
264	2222	1912	1655	1364	3784	2854	3080	1361	3438	1872	3185	1622	1656	3056	7957	3541	2013	1697	1824	4323	2013	2906	3591	2039	2578	1916	1673	2497	7786	4165		2320	2374	1372	2171	4307	2367	3194	1205	5164	1963	1871	1656	1637	3612	5412	4265	2287	2563
265	2154	2065	1627	1477	3543	2773	3211	1354	3474	1885	3201	1755	1410	3017	7995	3594	2205	1790	1590	4187	1966	2912	3245	1993	2831	1910	1649	2438	7597	3867		2460	2417	1356	2137	5085	2222	2943	1041	4886	2035	1598	1624	1518	3680	6133	4385	2287	2626
266	2286	2072	1650	1430	3604	2923	3217	1316	3425	2031	2930	1816	1697	2943	8160	3470	2079	1789	1649	3956	2091	3077	3709	1776	2902	1987	1999	2212	7592	4077		2183	2525	1504	2478	4250	2281	2850	1305	4965	1987	1678	1687	1669	3651	5326	4187	2376	2008
267	2309	1598	1679	1403	3774	2908	2903	1218	3417	2126	2834	1785	1480	2946	7827	3363	2046	1649	1690	4061	2152	3097	3439	2125	2582	2118	1926	2354	7802	4126		2343	2426	1542	2371	5032	2402	2994	1300	4935	2053	1582	1809	1540	3679	7589	4228	2459	2594
268	2314	1611	1575	1730	3495	2915	3019	1316	3528	2000	3034	1787	1778	3184	7853	3390	2108	1761	1752	4229	1964	2806	3503	2037	3023	2041	1299	2153	7374	3846		2311	2512	1380	2187	4360	2322	2972	1062	4892	2107	1654	1690	1541	4014	6486	4186	2384	2627
269	2253	1882	1583	1447	3651	2954	3024	1300	3581	1752	2874	1797	1635	3068	7772	3377	2186	1690	1677	3961	2068	2765	3587	2085	2640	2092	1958	2349	7852	4030		2215	2603	1572	2114	4317	2202	3020	1120	5001	2026	1603	1607	1610	3812	7528	4353	2354	2289
270	2075	1505	1694	1326	3714	2842	2666	1367	3517	2289	2988	1638	1562	3160	7859	3325	2409	1722	1689	4139	2260	3062	3385	2023	2605	1924	1502	2429	7817	3828		2136	2399	1328	2276	5220	2160	2897	1117	4866	1841	1705	1659	1776	4017	7794	4247	2258	2545
271	2184	2065	1585	1505	3866	2901	3236	1388	3427	1955	3082	1660	1882	3218	8130	3539	2148	1932	1338	4352	2102	3070	4006	1934	2553	2073	1751	2410	7802	3825		2416	2401	1332	2266	4979	2235	3202	1121	4949	2089	1401	1733	1569	3896	7587	4248	2393	2422
272	2306	1417	1693	1409	3704	2928	3021	1273	3621	2123	3049	1767	1114	3114	7884	3443	2151	1753	1787	4211	1947	2960	3957	2188	2836	1963	1796	2284	7517	3843		2278	2486	1511	2081	5027	2239	2939	1118	5050	1924	1742	1532	1471	3714	6694	3973	1925	2294
273	2322	1826	1546	1442	3797	2858	2753	1210	3466	2074	3005	1680	1725	2995	8527	3531	1918	1755	1595	3937	2061	3106	3953	1913	2477	1894	1282	2332	7605	3910		2115	2458	1601	2152	5048	2344	2925	1228	5061	2078	1770	1679	1626	3800	6362	4119	2361	2336
274	2228	2042	1654	1590	3641	2957	2986	1320	3359	1998	3048	1760	1726	2844	7920	3787	2126	1702	1620	4182	2113	3055	4124	2030	2291	2005	1870	2406	7763	3795		2282	2442	1463	2225	4883	2472	3009	1188	4920	2177	1808	1602	1539	3881	6330	4044	2427	2489
275	2177	2040	1255	1401	3643	2670	2927	1319	3481	2028	3052	1720	1679	2970	7944	3447	2213	1256	1583	4307	2017	2848	3226	1910	2833	1813	1772	2302	7982	3816		2261	2447	1508	2203	4799	2308	3189	1220	4919	2012	1585	1585	1519	3745	6812	3869	2407	2095
276	2283	1940	1615	1343	3563	3047	3061	1386	3093	1813	3019	1723	1646	2940	8030	3357	1890	1702	1674	4197	2284	3021	4132	2097	2793	1881	1354	2308	7839	3775		2205	1586	1516	2223	4927	2057	2876	1303	4845	1936	1711	1776	1687	4147	6432	4011	2475	2190
277	2383	1993	1725	1451	3724	2633	3168	1283	3329	1860	3207	1917	1382	2850	8007	3135	2137	1732	1782	4336	1987	2954	4167	2051	2625	1774	1661	2363	7738	3690		2051	2379	1560	2178	4196	2352	3248	1298	4922	1836	1463	1589	1713	3708	7472	4172	2303	2656
278	2149	1378	1581	1381	3844	2824	2892	1186	3462	1973	3197	1702	1680	2987	7874	3547	2029	1687	1570	4265	2108	3123	3932	2031	2826	1922	1838	2354	7792	4124		2027	2628	1501	1928	4836	2430	3316	1122	4889	1845	1685	1660	1720	3976	6663	3931	2190	2188
279	2404	1389	1715	1366	3719	2427	3198	1433	3483	1991	3285	1808	1442	2971	7760	3405	2404	1587	1589	4365	1924	3250	4045	1734	2193	1889	1717	2382	8076	4063		2044	2403	1522	2081	4712	2201	3287	1261	4991	2189	1587	1407	1582	3809	6620	3875	2305	2469
280	2363	2075	1549	1360	3780	2676	3198	1284	3535	1974	2968	1577	1292	2928	7971	3328	2254	1655	1603	4213	1960	2913	4090	1992	1465	1783	1672	2352	8249	4090		2263	2543	1513	2026	4796	2232	3229	1077	5015	2041	1533	1519	1568	3861	6442	3853	2551	2227
281	2221	1569	1629	1440	3520	2732	2891	1307	3220	2003	3098	1682	1737	2753	7107	3481	2069	1645	1509	4180	2030	2934	4022	2119	2005	1531	1640	2339	8368	4230		2068	2537	1423	2024	4858	2384	3114	1219	4897	1890	1724	1570	1609	3744	6478	4051	1913	2261
282	1965	1526	1734	1500	3717	2824	2796	1238	3495	2052	3277	1731	1286	2811	8063	3395	2093	1711	1722	4315	2179	2941	4091	1964	1563	1778	1336	2281	8327	4330		1895	2568	1649	2114	4889	2238	3007	1064	4860	1999	1644	1605	1633	3274	6087	4034	2276	2456
283	2325	1840	1778	1416	3658	2956	2946	1320	3338	1984	3087	1688	1405	2865	7073	3409	2135	1723	1753	4122	2053	2817	4105	1878	1672	1771	1561	2395	8451	4917		2295	2487	1512	1993	5114	2545	3222	1000	4596	1784	1657	1393	1650	3874	6555	4204	2282	2294
284	2357	1394	1730	1453	3773	2774	3215	1332	3331	1926	3191	1829	1468	2998	7026	3462	2056	1333	1542	4089	2039	3024	4050	2035	1398	1698	1657	2485	8474	4887		2493	2409	1596	1924	4726	2140	3158	1289	4832	1939	1679	1418	1428	3739	6201	3883	2302	2458
285	2174	1902	1668	1372	3809	2563	2738	1251	3328	1836	3374	1808	1484	2916	7268	3474	1972	1649	1638	4104	2056	3014	4123	1877	1936	1756	1517	2428	8345	4961		2435	2454	1577	2138	4200	2389	3160	1129	4573	1945	1853	1603	1713	3536	6509	4001	2187	2639
286	2225	1393	1811	1390	3588	2810	2944	1313	3331	2032	3389	1863	1509	3069	7087	3328	2043	1598	1609	4162	2179	3054	3957	2025	1940	1993	1689	2353	8328	4634		1836	2422	1124	2342	4817	2138	3261	1118	4638	1894	1695	1661	1703	3832	6354	3927	2249	2563
287	1989	1365	1841	1312	3753	2609	3177	1229	3407	1647	3286	1711	1462	2902	7136	3614	2091	1791	1605	4201	1923	2806	3845	2014	1527	1780	1621	2372	8436	4552		2315	2584	1534	2512	4618	2225	3281	1300	4882	1858	1722	1646	1663	3804	6545	4066	2288	2481
288	2160	1438	1767	1364	3666	2833	3072	1247	3383	2053	3103	1725	1265	2978	7164	3538	2040	1732	1340	4081	2147	2692	3401	2005	1584	1815	1843	2333	8178	4881		2214	2422	1438	2520	4720	2304	3028	1279	4755	2135	1631	1524	1569	3690	6320	3684	2191	2756
289	2288	1981	1630	1430	3788	2925	3116	1350	3408	2043	2991	1880	1822	2850	8194	3445	2163	1549	1750	4192	2010	3094	3823	2035	2695	1794	1762	2433	8009	4561		2317	2367	1388	1866	4110	2190	3174	1233	4619	1995	1536	1646	1520	3688	6206	4146	2287	2556
290	2226	1497	1701	1601	3642	2593	3157	1384	3379	1996	2848	1549	1643	2892	7203	3536	1978	1702	1815	3980	2097	2881	3279	1992	2457	1714	1409	2517	7944	4565		2281	2574	1403	2283	4887	2054	3199	1257	4566	2084	1626	1489	1625	3777	6253	3837	2449	2195
291	2217	1387	1575	1445	3698	2691	3264	1296	3486	1814	2871	1572	1603	2832	7206	3729	2342	1558	1582	4022	2116	3350	3455	1995	2887	1829	1432	2320	7885	4308		2215	2395	1383	1843	4911	2413	3088	1348	4593	1882	1491	1451	1558	3726	6106	3803	2117	2671
292	2337	1874	1834	1479	3623	2764	3016	1103	3451	1889	2681	1750	1445	2811	6996	3504	2161	1630	1623	4167	2110	2853	3547	1943	2644	1594	1702	2404	8253	4606		2268	2377	1452	2155	5061	2186	3115	1234	4689	1828	1627	1629	1409	3764	6161	4023	2273	2447
293	2201	1752	1755	1318	3610	2720	2746	1202	3346	2113	2873	1656	1432	3085	7343	3510	2148	1477	1563	4153	2054	2935	3509	1958	2700	1618	1542	2253	8142	4413		1934	2360	1484	2085	3997	2229	3083	1190	4557	2025	1670	1675	1620	3778	6048	3586	2079	2061
294	2233	1811	1865	1250	3760	2767	2996	1185	3545	1828	2902	1886	1497	2778	7351	3437	1908	1089	1738	4215	2018	2994	3360	1899	1876	1758	1544	2331	7967	4528		1893	2475	1472	1873	4780	2327	2879	1190	4701	1995	1661	1632	1688	3810	6083	3928	2314	2196
295	2245	1806	1667	1457	3715	2672	3063	1294	3562	2016	2869	1736	1578	2793	7382	3545	2062	1785	1785	3992	2065	2810	3624	1890	1913	1824	1613	2198	7752	4335		2399	2456	1507	2009	4201	2290	3018	1277	4545	1998	1695	1325	1717	3584	6125	3876	1986	2295
296	2196	1864	1623	1402	3704	2613	2714	1421	3452	1763	3059	1662	1489	2645	7586	3750	1990	1497	1602	4136	2018	2965	4008	1891	1554	1671	1642	2616	7957	4505		2315	2514	1542	2246	4844	2367	3030	979	4452	1799	1567	1671	1541	3586	6082	3703	2375	2159
297	2340	1847	1660	1431	3848	2808	3261	1273	3587	1895	2900	1673	1595	2770	7489	3735	2041	1698	1683	3982	2119	2975	4055	1935	1799	1644	1629	2446	7889	4431		2227	1431	1352	2492	3997	2280	3136	1274	4512	1852	1555	1758	1535	3656	6052	3825	2123	2213
298	2237	1835	1699	1586	3757	2751	2971	1288	3414	1772	2105	1850	1575	2716	7073	3439	2212	1697	1740	4104	1983	3024	4015	2096	1811	1829	1594	2419	7831	4203		2349	2319	1489	1907	4125	2286	3125	1314	4569	1900	1593	1629	1667	3384	6081	4145	1812	2451
299	2239	1906	1656	1329	3776	2716	3197	1448	3627	1891	1798	1855	1482	2779	7190	3401	2006	1855	1637	4330	2207	2881	3571	1899	2100	1763	1461	2332	7915	4196		2409	2499	1382	1996	4647	2270	3031	1066	4747	1942	1707	1707	1471	4172	6066	4000	2335	2476
300	2211	1820	1710	1451	3381	2972	3197	1383	3671	2093	2926	1706	1648	2767	7253	3439	2070	1754	1737	4213	1972	3018	3706	1944	2677	1756	1525	2297	8053	3966		2268	2470	1527	2208	4854	2216	3072	1028	4460	1870	1686	1517	1610	3693	5898	3921	2133	2289
301	2213	2012	1669	1425	3675	2948	3409	1398	3687	1788	2862	1917	1482	2899	7439	3483	2145	1252	1667	4191	2080	2877	3896	2199	2760	1663	1499	2521	7917	4272		2188	2648	1418	1973	4752	2365	2968	1120	4321	1830	1651	1746	1715	3646	5922	3909	2253	2469
[truncated: 409 more columns]

## Sheet: AIAGCaMP to dia and AWAChr
Figures 1B, 1D, 1E, 1F, 1S-3A, 1S-3B, 1S-3D, 1S-3E, 3G, 5S-3J, 5S-3L, 5S-3M
AIA::GCaMP5A F(A.U.)
Stimulus:	0																																			11.5 nM diacetyl
N:	1	2	3	4	5	6	7	8	9	10	11	12	13	14	15	16	17	18	19	20	21	22	23	24	25	26	27	28	29	30	31	32	33	34		1	2	3	4	5	6	7	8	9	10	11	12	13	14
Frame (Pulse at 100)
1	680	1004	645	893	887	1098	1858	642	680	1176	660	1011	687	820	1123	150	295	513	1104	594	830	1015	1167	1615	593	934	1245	547	627	869	1302	933	182	189		469	899	435	1040	833	1055	1608	547	812	1272	874	763	796	940
2	457	942	750	998	824	1137	1938	628	820	1046	642	917	655	859	1026	111	289	755	901	663	1000	825	1103	1558	598	1022	1392	729	598	762	1306	922	34	170		459	813	534	746	617	1095	1751	498	742	1293	1097	652	624	807
3	624	665	556	797	749	1137	1990	676	658	1197	807	744	688	702	971	179	426	649	1088	692	854	1019	1319	1617	670	871	1335	723	772	760	1129	1059	152	324		498	934	546	1013	760	1117	1703	587	1077	1454	946	723	784	819
4	480	983	745	916	796	1052	1981	706	797	1219	793	838	691	672	971	387	429	583	946	750	838	883	1009	1594	619	966	1293	557	705	652	1238	1028	283	334		515	921	567	942	818	1241	1744	597	917	1542	975	738	662	776
5	696	953	761	953	901	1121	1890	504	771	1168	747	698	612	611	1164	217	327	686	941	677	855	890	983	1713	661	831	1396	627	576	679	1042	965	318	338		546	710	695	914	942	1128	1685	481	721	1503	1013	647	660	956
6	583	902	871	1046	836	1154	1929	581	1012	1199	738	739	638	747	874	174	387	583	1013	759	801	749	1242	1447	745	884	1197	555	724	924	1325	988	90	290		252	632	502	910	728	1180	1682	500	1034	1358	927	812	786	904
7	744	847	672	908	756	1154	1976	549	801	1143	807	736	688	777	781	227	318	579	1017	710	836	959	1045	1770	632	1051	1254	665	691	704	1170	910	339	348		471	830	433	818	809	1024	1602	501	851	1345	961	637	783	782
8	540	871	719	863	981	1048	2066	652	863	1047	795	922	617	644	848	200	527	722	1054	531	1024	870	1297	1629	502	743	1194	710	668	595	1101	823	174	384		509	882	614	939	745	1143	1640	563	892	1426	1107	757	702	972
9	785	910	703	911	820	1262	1791	627	839	1158	624	855	657	729	1048	129	254	741	899	623	759	1003	1335	1404	643	704	1236	644	631	710	1212	848	109	432		346	867	676	759	839	997	1704	524	932	1428	959	648	777	722
10	595	909	772	794	1006	1312	1923	478	998	1075	838	638	581	648	971	262	493	684	1152	733	971	880	985	1846	516	884	1409	617	561	421	1020	1034	265	290		399	850	681	935	816	1139	1734	471	799	1389	1089	746	650	819
11	628	895	716	990	974	1081	2033	706	890	1343	776	821	824	920	1019	173	454	599	1153	799	952	908	1113	1640	635	1013	1304	616	727	768	1123	1073	151	438		545	951	710	905	715	1119	1681	636	714	1327	890	720	734	798
12	672	1021	616	1018	787	1064	1840	583	777	1091	591	662	522	747	822	135	491	540	1003	541	1007	956	1027	1535	588	1041	1315	728	793	562	1127	843	-6	269		458	903	664	822	762	1084	1611	530	935	1399	981	667	767	900
13	749	940	862	1087	975	1028	1796	700	846	962	799	849	519	773	1195	132	423	729	1041	593	900	853	993	1698	652	1070	1231	859	582	596	1041	898	220	423		460	825	500	846	801	1291	1608	484	760	1527	1017	888	705	808
14	659	865	673	747	822	1031	1943	704	826	1085	687	783	378	935	936	277	269	721	802	614	985	703	1261	1696	642	876	1291	688	612	394	1246	952	295	437		449	885	559	960	813	1207	1597	713	818	1442	857	597	788	921
15	642	1093	793	878	903	1250	1645	600	979	1309	760	832	687	933	933	167	311	518	1005	644	788	854	1370	1755	713	806	1311	672	456	864	1251	922	233	292		487	873	735	732	901	1056	1863	475	739	1552	889	725	728	799
16	662	1070	678	814	810	941	1836	709	895	1117	672	730	943	794	1129	73	181	659	934	640	764	937	1310	1597	761	722	1222	688	603	553	1205	1031	198	218		435	758	657	815	705	1289	1837	580	876	1232	924	683	789	698
17	678	1107	768	883	793	1062	1792	674	729	1130	849	845	863	820	894	195	286	629	1016	604	972	899	1480	1579	711	1006	1376	404	591	738	1124	966	276	333		417	763	566	815	820	1081	1684	450	908	1375	876	486	818	989
18	737	1071	689	982	781	1199	1765	613	757	1202	696	732	497	813	1013	214	329	887	1317	494	845	885	1173	1565	750	924	1266	617	592	726	1116	955	165	338		502	839	633	810	822	1036	1599	678	636	1267	960	658	575	973
19	766	1171	624	770	927	1052	2002	648	1151	1119	838	786	626	827	767	230	398	690	876	836	821	844	1320	1595	702	840	1177	644	824	569	1319	885	52	324		570	703	624	809	812	1218	1853	600	735	1319	1096	481	664	714
20	588	993	754	829	788	1058	1894	660	803	1207	813	798	669	825	898	268	513	732	789	573	826	929	1323	1571	651	736	1383	658	692	599	1294	993	101	310		327	764	738	984	697	1033	1598	533	894	1390	1003	790	683	753
21	810	961	834	865	977	1084	1963	678	855	1253	796	777	671	934	784	98	284	662	1041	723	1135	934	1324	1572	852	920	1349	762	732	533	1271	1013	179	285		386	950	704	883	730	1178	1734	678	1066	1304	1042	643	665	704
22	597	868	661	795	857	1044	1773	615	821	1174	763	768	664	651	710	170	368	718	919	578	652	761	1381	1771	647	925	1156	630	525	474	1068	899	198	366		696	748	709	787	731	1172	1626	500	966	1438	1066	595	702	769
23	768	1000	843	866	688	999	1909	603	864	1282	796	613	443	638	922	300	317	747	965	718	844	697	1334	1755	601	759	1284	653	625	562	1322	940	180	324		468	894	673	916	779	1192	1760	427	1021	1496	839	521	678	966
24	438	753	566	783	794	1062	1761	623	715	1100	691	938	412	681	652	244	296	621	905	598	732	880	1265	1501	729	770	1252	905	694	545	951	960	156	249		653	927	655	921	751	1247	1610	542	790	1382	1035	595	708	822
25	588	997	696	829	879	1205	1757	675	1019	1210	743	794	466	893	691	174	464	614	1052	752	911	730	925	1650	657	910	1169	742	859	572	1056	892	93	252		496	931	648	817	800	1186	1674	535	844	1408	1075	707	665	836
26	773	834	750	777	885	986	1901	697	874	1206	839	421	313	811	801	323	381	747	990	636	1020	836	978	1895	584	620	1285	765	908	504	1141	1077	160	287		501	740	526	729	746	1100	1640	438	919	1189	980	517	746	574
27	672	1097	712	947	928	833	1876	688	736	1167	685	721	760	881	829	216	407	720	1058	577	952	944	1104	1732	663	868	1328	472	766	581	772	845	155	613		424	754	555	965	630	1089	1620	625	1137	1367	985	477	598	826
28	679	894	801	918	878	1082	1864	698	700	1098	701	741	393	1026	757	105	522	747	1138	800	881	942	1374	1582	664	885	1103	758	838	800	1036	832	143	325		283	759	756	952	768	1116	1643	419	738	1268	922	757	659	666
29	760	1138	727	1037	878	1006	1723	566	645	1124	726	638	627	722	906	94	346	541	863	795	958	789	1018	1629	706	702	1115	515	973	453	902	811	-3	471		514	932	673	799	710	1028	1670	681	865	1448	1047	666	761	915
30	693	1088	684	858	810	979	1891	654	849	1217	760	575	407	839	888	303	593	814	1016	745	773	910	922	1734	713	815	1062	792	877	617	937	813	196	324		424	861	688	959	844	1217	1547	398	855	1137	922	538	627	856
31	600	933	825	1016	852	1116	1820	688	825	1179	702	636	597	1017	876	337	634	657	1087	691	816	872	1179	1613	580	730	1162	647	826	430	1082	958	111	307		398	694	672	1036	864	1098	1681	646	957	1295	1089	501	725	772
32	749	1151	796	882	768	1174	1834	613	1008	1246	683	794	509	838	892	57	552	796	771	444	938	953	1009	1528	552	799	1077	648	670	571	1148	797	151	258		442	854	398	959	732	1348	1644	666	905	1292	897	755	606	731
33	516	1035	880	954	718	973	1901	566	800	1150	722	852	583	937	893	29	528	643	1086	480	978	834	1122	1527	806	719	1205	413	876	625	1061	886	273	307		334	832	809	737	809	1188	1707	563	650	1258	991	628	926	783
34	881	1018	581	954	879	997	1921	712	745	1136	704	846	659	1014	955	218	385	646	1073	825	914	785	1069	1672	716	911	1024	621	709	620	849	904	177	140		537	856	649	1042	706	1173	1553	610	1195	1166	1026	465	725	838
35	760	1075	650	896	796	1013	1787	699	680	1065	727	853	521	1046	611	122	303	588	1000	843	778	714	1064	1755	407	878	1248	752	946	494	1134	975	159	262		413	835	618	846	937	1216	1588	480	1010	1258	1016	660	707	850
36	532	813	825	893	844	977	1703	627	1062	1150	866	947	597	982	678	-167	532	705	996	710	912	938	1143	1785	660	828	1011	813	660	500	1023	819	102	412		294	902	751	831	623	1118	1640	495	820	1224	1053	552	647	910
37	788	1137	766	883	816	895	1643	687	1134	1409	694	863	342	1011	895	55	389	616	828	510	724	772	1080	1465	575	987	1164	650	890	575	1111	970	226	220		419	982	728	905	714	1138	1689	603	779	1462	874	539	783	941
38	772	969	663	861	779	1045	1976	731	801	1281	698	956	771	803	595	109	513	641	1117	675	914	852	1218	1537	520	959	926	608	987	748	975	1431	84	356		472	897	659	795	756	1092	1645	655	1025	1234	927	584	613	803
39	564	1070	587	841	914	1150	1841	691	970	1230	648	1175	445	830	694	217	510	718	862	658	815	745	1432	1756	714	740	1078	652	906	595	942	1124	165	270		448	810	648	696	950	1337	1603	525	767	1265	868	594	725	718
40	600	1035	726	957	645	1030	2070	610	1041	1160	679	1335	658	950	667	120	478	789	1088	772	1004	953	1202	1696	428	1080	1248	675	860	417	982	875	163	293		421	835	536	992	649	1111	1523	634	817	1344	1067	700	633	859
41	676	924	631	884	834	1042	1729	733	801	1112	588	1217	680	712	639	352	274	502	1082	613	1018	810	1138	1990	657	911	1254	531	889	466	1000	1346	304	287		529	860	575	1044	962	1210	1689	476	1097	1158	1011	514	791	717
42	630	837	553	983	902	1052	1820	604	841	1149	598	1311	688	1157	698	308	433	584	959	728	805	828	1221	1748	630	895	1001	757	1184	726	873	1044	286	300		488	888	624	791	714	1157	1677	781	1122	1375	1035	456	866	850
43	618	1110	617	725	1092	943	1672	696	1012	1142	780	1359	571	1015	852	88	456	617	977	686	980	800	1088	1629	677	659	990	661	928	521	1046	1114	264	330		720	784	513	1137	631	1319	1626	500	802	1201	1134	573	684	811
44	663	1114	724	876	855	1033	1920	696	706	1391	740	1232	479	847	849	162	413	624	920	588	1044	721	992	1653	578	857	1140	686	807	374	929	971	-35	363		533	934	643	702	680	1379	1536	501	897	1335	997	557	758	695
45	860	907	539	884	817	974	1683	597	894	1117	741	1112	419	1053	962	94	376	788	862	830	892	887	1235	1620	589	1074	1097	700	962	547	884	1076	232	374		391	879	591	891	895	1200	1542	476	945	1404	1077	439	557	702
46	781	918	639	1019	843	932	1751	536	956	1070	648	1136	683	742	926	151	346	687	1044	695	724	837	1240	1545	604	883	1215	573	688	416	1025	1089	-71	253		413	797	564	910	596	1115	1738	545	736	1236	1083	557	836	746
47	766	851	757	971	931	1129	2049	526	675	1194	556	1247	526	1006	1099	81	366	641	1020	704	905	679	1102	1814	589	931	1122	667	898	704	988	799	63	350		369	883	636	748	785	1311	1745	424	1098	1227	1225	579	647	784
48	700	1013	646	944	807	1114	1623	636	850	958	647	1049	498	734	894	203	379	633	1208	646	798	886	858	1831	621	902	1111	642	1000	413	1006	896	235	246		655	809	530	923	709	1156	1736	600	922	1232	951	674	652	923
49	625	880	537	879	869	1054	1942	637	756	1215	737	986	481	907	1258	123	503	739	1052	582	756	943	1245	1779	669	758	1141	447	1020	662	852	797	14	403		532	840	532	963	763	1133	1610	633	1065	1159	989	827	615	783
50	655	1145	591	928	773	964	1678	620	776	1277	784	1049	541	1028	1394	290	224	773	829	686	792	828	1146	1767	652	1000	1089	484	784	425	1019	624	226	446		404	784	549	746	1067	1321	1616	568	689	1244	992	669	578	888
51	781	928	919	883	844	1082	2031	609	779	1097	666	1167	713	683	1513	106	483	611	934	873	1027	769	1418	1435	778	1008	1080	706	812	419	889	757	195	339		306	892	714	988	786	1261	1633	512	700	1087	952	646	648	913
52	665	900	593	917	730	1003	1619	790	780	1162	837	1107	546	979	1513	106	427	650	967	804	795	844	1256	1432	606	1087	1054	674	838	517	1010	655	195	413		630	862	676	717	639	1204	1653	581	753	1222	857	575	695	791
53	731	601	740	859	915	996	1962	638	857	1104	678	1123	416	1000	1208	260	431	755	1083	665	964	849	1250	2002	757	987	1044	664	761	630	953	560	108	441		462	919	730	954	763	1245	1691	699	860	1066	860	488	632	837
54	552	1024	588	977	789	1106	1965	652	902	1293	615	1377	636	943	1205	229	476	740	1093	529	869	796	1360	1644	632	871	1170	647	834	469	859	836	-15	596		372	709	564	962	844	1273	1550	571	964	1096	945	575	737	894
55	637	1113	835	750	921	1175	1492	638	856	1326	632	1210	583	845	1607	140	437	801	1052	699	885	829	1343	1696	700	927	1022	733	1012	705	927	815	302	482		725	848	702	776	601	1171	1637	679	824	1199	904	488	799	950
56	923	938	839	1161	878	1076	1709	582	777	1062	581	1205	654	1141	1376	-46	488	663	900	741	980	806	1154	1697	669	1010	1069	717	889	656	998	758	205	269		401	953	588	929	705	1339	1690	503	828	1245	832	556	618	945
57	579	938	763	932	690	913	2005	563	857	1246	736	1244	322	1085	1273	82	406	829	1064	702	902	782	937	1647	664	1001	1245	648	832	515	994	772	85	351		440	911	674	954	661	1260	1684	487	682	1270	1036	573	743	1083
58	694	1109	648	1022	839	1062	1738	630	831	1225	660	1227	547	854	1179	165	164	675	1059	664	756	1030	1189	1725	650	967	994	857	673	600	1161	740	181	466		471	783	662	966	675	1241	1894	450	1020	1100	704	702	734	734
59	580	968	602	903	808	1128	1940	710	842	1069	745	1280	514	985	1381	24	228	704	789	772	904	835	1236	1801	750	918	1000	643	607	532	974	719	228	342		610	746	554	837	603	1184	1738	510	776	1298	841	625	683	724
60	671	982	720	881	801	1123	1599	728	857	1373	645	1212	604	1062	1392	101	442	891	1015	813	853	827	825	1614	628	1218	1170	714	809	432	712	844	235	425		635	854	533	878	772	1241	1746	627	886	1291	860	595	504	833
61	664	937	700	1002	804	1075	1932	624	897	1144	788	1387	523	1085	1553	176	459	883	874	759	1025	865	1020	1916	675	962	1015	691	611	755	899	905	146	489		520	754	596	951	689	1231	1839	489	844	1076	858	585	717	806
62	677	1227	618	768	757	1071	1759	589	1038	1193	621	1389	596	697	1099	312	443	566	909	535	700	961	1120	1609	481	1019	1000	820	766	638	829	705	172	342		721	898	718	956	697	1173	1618	529	774	1201	708	351	872	831
63	665	1034	780	720	924	1010	1814	595	750	1152	663	1188	579	804	1337	150	431	509	746	613	833	937	1381	1646	656	1045	1118	639	686	453	983	856	86	402		585	874	671	971	838	1279	1646	644	864	1155	940	643	726	904
64	696	1041	400	1133	807	1065	1675	619	831	1214	916	1105	651	1108	1328	323	243	668	932	499	901	852	1010	1820	730	1038	1120	781	807	557	960	827	307	430		476	726	706	918	868	1067	1626	486	964	1023	1033	641	837	825
65	714	1136	556	991	717	1062	1734	529	809	1107	880	1125	493	937	1390	270	387	594	1090	795	968	1081	1268	1848	575	1095	1054	799	630	609	888	928	87	391		523	911	547	922	729	1154	1845	574	945	1121	876	519	651	661
66	722	926	699	847	870	949	1662	717	786	1196	824	1040	610	782	1325	143	354	546	857	835	903	912	1352	1917	632	810	1003	768	669	558	962	807	122	324		397	884	808	991	598	1164	1767	473	1100	1145	856	642	920	718
67	810	983	745	987	828	1002	1928	755	649	1211	820	1225	870	1052	1176	69	260	795	1020	486	892	1027	1060	1425	593	806	970	709	778	630	933	668	217	320		238	882	529	851	763	1103	1738	605	959	1195	911	463	638	683
68	744	901	523	915	911	968	2033	599	918	1250	672	1015	304	1019	1323	174	448	655	1017	694	942	943	1096	1525	571	959	1027	577	772	708	911	744	47	411		329	787	662	1048	698	1228	1527	528	952	1260	794	731	724	765
69	608	1022	633	983	776	925	1757	690	812	1201	671	1037	430	888	1361	160	432	644	963	403	692	719	1231	1793	640	1026	1012	715	745	440	1063	752	264	350		429	891	659	696	724	1227	1588	461	704	1153	839	638	772	815
70	824	901	792	908	842	1106	1921	602	924	1130	664	1025	588	822	1400	244	301	648	1083	787	913	930	889	1718	774	765	1138	527	707	707	1102	747	247	298		521	879	653	844	848	1149	1629	612	855	1235	893	587	705	830
71	742	1086	807	863	950	1105	2113	575	763	1192	799	820	383	738	1235	209	280	519	748	829	972	872	1187	1542	680	1105	925	689	683	661	859	756	193	286		462	881	667	815	795	1100	1633	546	907	1132	815	618	846	844
72	691	914	884	975	922	1145	1872	702	848	1170	769	1005	529	1017	1492	253	328	820	1062	736	929	959	1128	1798	760	833	1109	723	658	519	869	616	136	186		484	765	508	1172	856	1310	1691	506	807	1171	761	422	586	858
73	748	769	490	974	794	997	1782	723	900	1144	746	1042	358	950	1471	137	249	706	1003	858	1036	889	1310	1598	743	1163	1062	629	737	629	1056	615	250	276		443	728	613	891	697	1215	1601	595	846	1189	828	635	778	725
74	550	923	635	734	724	1023	1835	538	906	1279	773	921	522	777	1397	134	366	680	842	637	834	921	1093	1526	548	979	824	800	556	316	928	948	258	286		437	827	649	1086	759	1224	1675	528	890	1135	816	594	589	824
75	746	1020	717	746	641	1104	1990	458	848	1224	661	1140	491	996	1252	466	385	674	1154	686	883	903	1053	1615	633	978	955	732	591	562	959	820	134	364		498	709	518	779	607	996	1573	516	850	1174	895	513	576	762
76	598	1176	649	763	787	1012	2026	487	832	1280	759	1104	379	876	1343	302	428	646	1074	677	872	873	1402	1483	638	913	1200	809	570	736	1072	800	109	326		665	591	687	930	708	1228	1815	676	914	1114	991	659	682	748
77	766	1056	601	1030	793	1089	1635	663	982	1153	754	1149	761	1037	1462	277	477	741	978	478	832	777	1338	1684	603	879	1042	662	524	577	878	657	174	199		463	709	687	1022	674	1170	1686	467	748	1088	969	606	922	802
78	861	1172	778	733	859	1118	2051	543	851	1181	664	1162	445	1290	1526	37	513	588	1079	595	1008	909	850	1834	611	663	1092	723	628	522	1057	526	375	236		454	748	751	967	816	1192	1822	465	850	1074	934	563	690	768
79	746	893	681	902	870	1132	1940	604	870	1160	762	1043	671	1106	1441	115	170	854	1110	548	908	981	1170	1778	575	690	801	609	664	511	902	831	223	319		611	835	584	770	853	1159	1602	516	858	1209	838	559	845	762
80	675	1001	703	1054	906	1159	1601	607	699	1120	624	975	745	1004	1329	386	358	434	889	649	1007	1016	1189	1556	532	1065	1016	662	594	704	902	748	162	349		537	743	619	709	685	1219	1710	580	820	1014	868	675	671	751
81	746	974	648	1040	876	1190	1795	732	822	1136	720	1010	662	988	1287	37	555	635	1188	715	888	832	1017	1747	838	874	1057	631	596	693	1070	749	296	245		565	746	527	966	694	1244	1735	638	930	1012	891	459	588	690
82	654	1041	729	847	860	1078	1745	588	623	1302	675	955	748	1082	1312	53	276	484	810	681	1012	883	1239	1497	669	919	1026	653	699	597	1021	500	134	372		598	806	543	937	629	1173	1726	509	732	1063	901	597	548	708
83	696	1287	587	892	930	1009	1788	723	917	1049	810	1045	567	803	1544	229	282	751	1095	694	879	900	1034	1694	650	1007	1159	641	507	615	840	773	323	163		447	786	551	861	845	1102	1949	512	926	1124	852	516	796	863
84	756	1015	783	874	782	1160	1960	556	813	1240	733	998	553	999	1305	235	357	841	1101	483	860	932	1303	1691	810	1092	877	698	689	662	991	669	197	446		589	912	583	900	781	1281	1753	617	880	1046	945	565	673	930
85	988	860	600	1046	813	1095	1992	601	884	1146	714	879	676	945	1264	334	464	693	1127	664	877	931	1270	1870	605	889	989	712	573	704	998	822	325	320		491	851	645	853	756	1288	1879	540	768	1203	745	502	635	897
86	674	1048	814	885	838	993	1677	501	826	1196	807	941	631	1069	1163	155	337	589	1019	863	779	767	959	1739	592	1030	909	696	428	579	947	814	321	485		602	670	650	928	739	1107	1521	475	776	1079	806	643	784	782
87	603	1149	813	1021	804	1040	1548	608	793	1121	681	1127	538	1134	1499	407	424	533	1151	597	849	750	1345	1616	439	986	1088	755	608	770	994	691	260	213		593	876	621	944	913	1322	1769	680	807	961	730	570	766	843
88	742	1050	640	730	835	977	1799	669	832	1186	748	930	628	999	1218	95	286	743	1061	759	895	824	911	1654	660	811	1050	706	585	578	917	677	290	400		445	914	676	1119	741	1229	1739	500	878	1106	830	463	706	1000
89	704	1056	638	947	841	987	1831	703	813	1143	740	1042	491	1163	1245	1	290	777	1186	550	790	726	939	1613	685	895	937	593	761	545	950	833	34	374		589	748	616	897	748	1217	1557	551	1106	1058	799	377	913	663
90	602	898	872	828	697	963	1978	660	740	1163	761	1025	512	1280	1063	235	282	790	990	896	974	804	1291	1605	668	1031	1068	709	574	532	941	804	440	314		502	956	581	801	707	1251	1650	620	913	1219	918	596	666	678
91	845	1068	682	960	799	1128	1907	700	712	1243	622	1129	562	968	1128	271	465	636	881	859	972	748	1266	1870	746	926	1083	518	592	630	874	788	355	476		487	1009	628	895	842	1193	1800	580	891	1054	951	512	658	773
92	660	1014	665	984	836	1108	1848	760	851	1379	942	888	591	1260	922	323	385	744	959	722	926	979	1011	1477	567	998	991	777	653	615	1007	841	287	262		579	876	644	860	708	1004	1621	512	883	1356	884	548	666	1040
93	733	930	282	993	1001	1026	1713	834	844	1146	756	845	690	927	672	221	276	554	1020	678	803	920	1222	1540	730	999	1236	513	703	532	889	907	224	233		603	934	806	700	536	1258	1731	558	805	964	901	499	739	749
94	572	1059	719	890	710	988	1887	837	842	1278	687	1079	446	1031	947	248	298	595	1017	578	827	793	1282	1635	567	999	900	593	678	590	856	757	272	289		438	760	550	754	785	1097	1750	502	853	1109	901	477	475	774
95	555	983	567	881	835	978	2064	1102	774	1150	540	1150	559	1108	1005	197	163	470	1084	647	842	654	1511	1823	711	976	942	690	529	840	1014	996	111	254		508	753	614	908	803	1300	1606	566	680	1070	994	525	680	597
96	670	787	718	823	726	1001	1861	1082	706	1430	796	1069	534	1000	941	292	339	744	957	725	689	782	1124	1562	623	898	1108	820	540	597	840	852	247	295		521	879	484	945	769	1096	1712	745	938	1303	887	505	614	815
97	579	1399	907	898	843	1093	1947	1136	792	1382	736	857	643	1132	805	176	459	521	1009	595	843	855	1381	1651	579	868	1061	584	588	618	1168	1044	182	281		346	808	528	887	769	1249	1709	577	1022	1189	783	475	768	768
98	663	1088	924	941	879	877	1936	1447	923	1175	898	826	548	1178	835	152	483	568	1104	641	751	860	1345	1719	441	842	1007	772	635	486	816	1074	157	498		485	917	678	1048	687	1210	1803	623	859	1087	948	501	678	799
99	743	894	508	849	875	1212	2000	1054	904	1385	812	800	619	1215	701	259	814	724	1134	646	939	709	1214	1713	582	935	884	775	764	408	943	910	253	324		520	935	694	831	825	1090	1682	578	724	1117	830	572	816	658
100	696	1050	624	989	744	1089	1952	1073	759	1432	638	850	613	946	1152	206	783	761	938	720	892	815	1113	1753	616	858	1040	760	540	577	893	756	57	345		498	783	582	769	656	1130	1611	561	897	892	943	565	766	538
101	859	1047	779	654	784	1086	1520	987	884	1408	663	836	595	1091	1033	100	711	708	1059	717	797	720	935	1872	580	1038	968	698	657	827	1023	1004	278	540		527	916	786	1021	785	1149	1919	674	844	1159	1014	657	628	594
102	786	1309	783	1196	816	1063	1888	1187	762	1227	780	842	457	770	790	208	726	686	1129	584	818	779	926	1542	558	936	990	702	605	572	847	881	89	266		592	806	725	840	741	986	1760	471	869	981	919	590	550	1060
103	704	1041	831	984	898	998	1967	1118	761	1409	774	892	548	1261	875	162	641	791	1018	727	1018	764	1246	1926	585	783	982	614	687	910	1056	996	133	372		400	854	780	870	624	1030	1780	606	855	1179	933	636	730	905
104	616	1174	859	799	866	1081	1991	1199	949	1453	716	836	546	986	898	282	439	767	1020	583	789	978	1121	1697	596	1048	1101	663	474	626	978	777	123	269		419	882	477	1000	714	1126	1697	593	872	1192	865	630	659	905
105	740	942	734	1063	736	1107	2067	969	761	1380	708	728	606	1059	844	184	494	449	646	777	927	736	1165	1810	563	927	1060	586	653	470	1183	823	237	198		428	672	598	1123	739	962	1667	598	793	1083	994	572	943	782
106	468	1099	581	880	841	1084	2001	900	803	1281	706	839	600	1102	864	182	661	740	852	834	721	874	1089	1900	662	962	990	706	688	559	1024	894	233	196		507	829	647	1038	816	1105	1614	538	927	1058	906	674	663	768
107	581	1007	774	818	854	1036	1867	976	698	1273	734	825	553	1033	771	81	544	766	1130	711	978	1042	1231	1777	660	1184	970	743	553	523	957	855	242	202		447	876	628	748	869	1198	1558	594	854	992	1036	566	736	759
108	584	1045	557	845	770	1081	1871	1087	947	1333	871	883	630	1072	723	142	515	776	973	782	663	853	1149	1659	495	774	1068	529	712	507	1056	628	86	423		578	796	622	942	771	1153	1752	413	909	1040	861	653	687	906
109	780	1154	821	832	805	1082	1792	1062	835	1254	738	825	570	858	914	293	458	625	968	768	924	923	1360	1731	682	977	951	401	651	629	963	663	253	163		453	938	626	813	686	1131	1830	774	1015	1113	839	533	746	723
110	795	963	808	880	847	1075	1838	928	848	1452	758	828	458	927	749	272	638	609	1005	737	847	943	1104	2018	739	765	1045	714	639	774	953	794	102	354		555	844	686	779	738	961	1647	708	890	1087	935	625	713	755
111	665	1136	526	956	785	1133	1944	901	800	1348	684	736	612	931	673	168	559	369	977	765	839	767	1057	1927	644	836	964	884	618	772	1211	694	249	363		654	979	564	780	696	1152	1477	447	944	1095	968	554	700	963
112	622	719	543	1008	788	1134	1956	939	885	1356	746	759	473	936	781	388	541	650	1026	612	1001	868	1218	1646	593	862	975	652	463	799	1021	755	162	544		571	826	645	836	663	1177	1650	566	853	1060	785	504	700	712
113	686	1007	638	716	897	1160	1926	1011	932	1397	896	610	645	998	798	120	528	694	1049	668	932	812	939	1613	597	756	972	741	659	801	1362	860	228	332		419	858	668	1021	761	1045	1540	628	988	1065	772	542	762	805
114	663	973	546	852	791	934	1981	879	918	1237	684	807	469	1076	783	19	446	677	910	657	860	832	1015	1553	540	819	972	654	683	649	1028	781	160	225		366	907	586	957	839	1100	1629	574	871	1001	864	568	585	1050
115	614	1082	644	780	862	1149	1640	838	740	1276	697	487	661	884	633	132	378	796	1011	792	921	876	1180	1798	595	938	1130	613	541	723	995	712	471	157		462	902	641	1106	710	971	1591	638	864	1059	1002	622	823	793
116	711	1288	867	968	808	1044	2006	845	868	1448	886	880	624	873	761	245	400	629	894	549	929	766	1171	1778	621	761	865	703	675	684	1080	846	86	525		597	819	577	789	680	1246	1722	606	1025	1100	992	640	723	794
117	868	992	907	945	973	1038	2042	784	1028	1334	657	856	459	993	933	198	540	739	893	557	989	915	1209	1905	534	1005	1041	716	612	733	970	774	288	389		437	856	535	1034	822	1007	1639	650	837	973	898	614	568	671
118	844	1172	711	772	814	1076	2129	800	934	1457	778	754	477	795	786	108	500	718	938	936	991	946	1012	1692	735	846	971	623	559	646	960	757	152	316		523	840	708	986	781	1167	1618	478	936	1230	856	420	692	910
119	658	708	568	882	943	972	1868	847	894	1374	725	680	448	848	969	252	467	600	1152	813	868	731	1057	1634	564	930	895	673	597	771	971	895	228	191		452	855	677	898	669	1158	1667	496	730	1126	853	511	783	904
120	909	975	928	1033	825	1038	1952	915	857	1290	676	743	783	1006	616	220	476	799	1114	617	960	818	1193	1781	638	1031	959	768	810	665	1133	775	159	348		455	796	535	896	730	1051	1731	505	821	1222	742	591	612	999
121	767	1149	889	847	811	991	1888	751	682	1183	854	755	649	968	740	203	480	670	910	652	995	847	1132	1965	550	1052	814	675	665	741	1095	719	211	518		380	918	660	822	726	1120	1601	448	586	1127	849	536	623	971
122	753	987	562	848	957	997	2038	831	790	1288	795	823	683	1074	796	67	483	696	943	647	793	902	911	1647	570	956	1048	681	694	866	1016	719	158	347		399	848	757	764	786	1012	1628	510	818	1181	838	594	741	769
123	666	952	539	828	795	957	1780	775	852	1328	643	950	639	1012	959	156	612	577	956	729	885	771	1301	1671	476	997	898	599	655	665	1044	783	245	383		575	916	701	949	759	1235	1648	495	873	1120	794	624	803	891
124	792	1084	707	932	888	996	1918	812	728	1393	821	1314	602	946	787	109	626	851	855	833	1179	698	1042	2007	543	1117	1083	715	608	663	1177	695	110	336		384	775	738	712	778	1095	1590	533	1086	1050	1042	455	644	672
125	758	1014	722	1022	941	991	1923	939	888	1438	843	1407	793	859	1106	189	559	678	1047	721	924	992	1064	1825	463	904	828	449	546	606	944	953	62	360		383	778	672	940	813	1128	1717	522	889	1133	831	532	673	782
126	631	1127	777	1037	815	950	1762	1161	849	1210	628	1226	501	948	1380	322	710	557	1045	724	900	740	1120	1776	522	742	967	509	715	594	1041	938	78	293		491	718	543	878	773	1162	1644	562	1090	1180	913	440	799	785
127	731	1066	863	931	828	1117	1872	1198	791	1314	810	1316	374	939	1193	221	684	471	875	696	914	775	1283	1552	606	974	906	608	752	1009	917	916	173	265		549	815	663	682	723	1096	1658	553	866	893	1056	726	562	904
128	748	978	691	948	890	1172	1766	1421	826	1390	825	1417	483	948	1262	290	699	701	866	761	935	786	1332	1894	614	1039	926	662	667	677	1056	772	124	372		482	872	505	603	624	968	1716	524	850	1330	911	419	673	893
129	629	984	551	760	955	961	2024	1483	1081	1305	659	1239	549	1005	1321	289	565	698	930	867	940	846	1381	1705	621	839	994	636	625	713	1074	828	207	331		422	829	605	749	784	1207	1601	563	811	1047	824	749	650	667
130	482	817	726	829	804	1036	1882	1218	869	1277	607	1196	550	939	1194	307	578	630	786	463	770	888	1216	1890	708	789	1147	723	650	650	1012	740	177	315		672	813	797	853	704	1263	1698	639	837	1145	802	669	848	782
131	653	1116	871	680	854	998	1862	1477	920	1418	726	1361	580	885	1544	73	627	802	1114	610	972	825	1286	1821	604	1036	974	753	578	686	1174	758	441	242		331	890	660	770	688	1167	1650	500	775	1214	804	938	588	789
132	644	997	943	1065	791	1002	1699	1347	855	1301	732	1262	559	856	1305	329	562	753	987	624	943	872	986	1652	607	946	1025	655	650	856	1238	617	259	328		608	694	755	1066	745	1294	1843	694	826	1293	850	1162	743	830
133	787	1055	948	983	748	1005	1881	1367	701	1331	772	1206	805	816	1473	59	480	727	718	675	806	815	1202	1649	568	893	1062	621	731	674	1028	828	285	227		413	847	586	808	711	1279	1709	799	895	1248	873	1294	612	783
134	761	945	603	916	944	857	1761	1503	787	1415	702	1329	516	1018	1174	174	561	460	910	684	854	1027	1191	1672	563	856	1010	685	559	647	1173	837	166	365		776	847	686	768	866	1264	1714	882	842	1155	813	1325	847	783
135	706	1042	881	969	857	929	2025	1304	693	1311	590	1142	650	821	1279	433	602	746	1155	666	1032	945	1206	1682	496	1138	1088	706	695	552	1052	1050	331	385		638	860	705	888	952	907	1730	835	781	1137	801	1431	680	803
136	827	1105	399	823	780	1072	1762	1361	1029	1424	731	1296	646	993	1475	29	959	538	880	608	904	906	1297	1759	544	878	918	629	580	650	1209	964	324	387		546	823	628	969	808	1237	1573	746	728	1104	959	1289	794	728
137	626	1184	665	966	997	1073	1941	1241	866	1447	703	1143	551	883	1306	205	850	652	995	606	970	769	1249	1868	743	1228	1096	798	704	588	928	1074	349	309		631	892	533	849	1244	1102	1607	927	890	1121	812	1143	864	707
138	830	898	726	960	903	945	1738	1114	854	1256	854	1199	476	879	1341	250	1095	702	1063	687	926	808	1226	1652	542	825	1081	763	687	896	1165	1062	406	257		871	832	729	806	990	1211	1632	869	929	963	886	1353	764	893
139	423	1063	806	1092	852	841	1589	1092	918	1220	809	1424	504	890	1480	-118	735	562	982	647	862	778	1197	1547	611	935	1001	709	653	589	1029	1138	278	216		386	924	716	792	1117	1161	1781	897	687	1143	748	1304	817	871
140	690	821	640	814	789	996	1745	1188	1062	1153	752	1429	588	885	1294	246	1008	584	678	570	939	916	1301	1790	613	842	1087	778	520	605	1202	1163	242	295		797	852	679	841	749	1463	1648	943	886	1119	854	947	596	819
141	812	1042	804	1149	872	1041	1857	1185	756	1346	776	1128	667	820	1274	200	1055	618	925	795	1037	752	1199	1745	539	991	992	711	612	714	1295	960	114	416		554	836	622	934	700	1895	1778	751	908	1029	907	1225	629	758
142	853	1001	611	978	966	1157	1816	1137	869	1431	879	1145	764	1037	1248	42	856	586	1112	675	947	841	1233	1686	437	858	931	538	825	616	1103	994	284	385		398	860	600	950	1164	2332	1770	772	814	1151	720	1037	716	668
143	488	1130	696	807	801	999	1927	1053	894	1514	642	1180	634	1169	1287	297	1100	616	1059	560	1009	891	1023	1652	564	1090	1077	702	781	589	1141	946	82	331		489	995	610	799	1156	2607	1685	835	792	1148	877	988	703	778
144	648	939	633	846	893	1161	1766	1075	910	1281	761	1101	625	729	1232	190	1096	749	997	698	692	818	1287	1492	609	956	1001	879	599	401	975	943	181	206		570	898	737	947	742	2712	1725	810	713	1269	788	922	698	935
145	794	1270	810	1012	851	1007	2058	1056	997	1118	849	1111	478	857	1132	19	922	651	931	455	846	716	1169	1803	706	1006	898	705	743	796	1210	882	270	281		732	704	711	885	1270	2702	1719	902	742	1168	917	1064	748	760
146	543	1014	766	903	930	940	1819	939	703	1422	594	985	513	1037	1076	72	1163	673	841	499	961	893	1162	1703	650	734	929	682	649	848	1092	1004	173	335		315	886	866	711	1222	2358	1706	663	952	1280	916	1144	617	672
147	497	893	822	864	733	1110	1821	1023	958	1372	679	933	730	947	1000	181	955	550	991	729	868	987	1177	1637	543	948	964	666	695	567	1112	963	426	352		387	974	684	1045	1156	2552	1611	716	897	1326	813	823	615	794
148	573	1011	754	954	989	986	2052	845	991	1202	590	902	602	1063	1035	186	985	542	1083	359	946	691	1070	1481	596	783	881	597	546	581	1067	730	342	202		692	1052	826	1031	1396	2304	1656	754	978	1382	1013	967	950	740
149	663	977	783	843	802	1002	1936	867	926	1305	786	879	630	1015	955	151	965	686	915	733	782	806	1197	1893	606	1047	904	671	599	584	1048	952	211	348		653	945	821	1083	1151	2444	1511	645	914	1430	903	863	728	833
150	747	1074	832	841	860	934	1789	879	901	1186	817	1063	563	1152	902	114	650	650	890	699	1095	810	1239	1721	537	1040	1066	574	616	723	1089	865	244	392		672	1022	810	855	1079	2356	1762	907	875	1184	813	905	812	904
151	544	922	800	851	816	1055	1798	925	801	1291	598	957	576	1011	883	189	823	536	974	745	866	817	1300	1744	665	877	878	609	649	540	1340	874	249	631		547	989	746	768	1137	2423	1511	865	925	1267	791	837	646	869
152	592	993	705	912	785	1008	1968	895	679	1371	835	750	513	936	988	211	799	654	1023	700	776	821	1104	1692	613	848	806	653	707	560	1133	705	180	315		466	1053	544	1014	1164	2367	1561	905	912	1320	961	1036	773	626
153	719	831	723	1017	904	1057	1868	852	949	1342	797	753	591	910	764	473	825	699	973	759	788	859	1166	1745	590	868	918	729	713	549	1347	724	135	226		416	922	829	991	1385	2190	1723	1031	847	1349	863	783	852	834
154	608	999	690	1016	944	896	1998	869	921	1015	743	836	727	1022	1051	198	700	715	1035	772	1009	757	1165	1560	630	910	1133	598	651	735	1333	756	282	295		384	995	654	931	1190	2161	1757	986	1090	1421	945	893	760	772
155	777	907	874	1119	818	906	1967	831	710	1246	661	748	547	1074	1379	293	745	737	1036	579	871	961	1092	1510	545	949	1201	890	656	549	1285	943	236	167		447	965	676	963	1159	2195	1758	1108	749	1207	993	829	921	718
156	658	966	571	1152	855	1133	1924	738	1071	1135	781	1049	575	953	1415	22	764	639	980	845	755	841	1315	1931	551	906	958	570	757	1070	1399	638	217	88		792	1014	752	770	1186	1947	1727	909	991	1425	941	991	831	746
157	513	1023	783	1210	605	974	1619	817	764	1086	635	680	564	1035	1509	192	539	663	832	777	1010	840	1390	1522	585	883	977	523	536	726	1127	719	-63	400		520	959	648	943	1214	2008	1500	1068	755	1332	963	823	780	932
158	764	869	781	1068	795	1058	1939	760	753	1370	758	740	625	1112	1589	78	618	558	892	680	1167	868	1159	1606	409	949	1001	930	567	618	1201	885	308	418		821	1179	667	808	1344	2035	1610	919	846	1424	910	872	652	930
159	948	1021	484	1138	853	937	1839	744	1053	1094	647	830	645	1058	1433	100	723	656	1226	715	887	844	899	1975	551	755	859	825	499	698	1300	826	146	457		1024	1038	640	896	1254	1984	1833	957	803	1320	795	902	770	863
160	772	961	753	996	898	998	1870	763	709	1236	618	688	391	1187	1370	225	503	552	1039	570	867	673	1204	2108	526	834	1061	800	531	816	1289	960	88	271		791	1075	678	970	1263	1776	1698	864	838	1290	922	1265	887	983
161	622	896	641	1205	783	1081	2012	841	832	1274	794	802	627	1241	1385	190	390	648	971	595	902	939	1151	1939	658	900	894	651	720	617	1270	854	81	280		518	1003	559	901	1123	1946	1690	892	827	1348	875	1216	777	898
162	849	855	686	1041	837	1072	1865	790	976	1316	487	882	656	1101	1506	244	593	654	1013	605	1029	935	1304	1895	581	635	1010	888	556	642	1492	728	153	279		453	942	634	825	711	1670	1706	824	973	1435	822	1368	769	750
163	885	1253	822	1079	704	1028	1998	774	1017	1265	551	761	413	1197	1288	231	510	615	1027	412	791	844	1178	1705	623	915	852	585	821	582	1239	832	-60	394		449	974	796	792	1170	1723	1765	899	1007	1462	824	1292	487	673
164	685	912	843	1050	946	962	1761	712	732	1173	637	893	594	1166	1271	157	577	540	902	917	1110	808	1160	1750	657	839	969	676	731	859	1380	1111	276	396		357	989	722	732	1136	1814	1821	870	848	1560	892	1326	913	638
165	563	843	748	942	807	959	1823	815	849	1154	706	861	520	1093	1669	39	352	768	1018	601	820	973	1167	1725	600	831	995	570	924	514	1341	913	214	201		409	879	762	898	1475	1736	1729	775	931	1519	833	1246	784	779
166	578	1027	758	1058	862	934	1990	839	715	1325	633	712	372	1068	1392	211	257	709	1132	746	1096	721	1154	1808	555	994	841	706	953	624	1276	724	216	169		257	1090	553	743	1212	1625	1706	800	969	1390	841	1216	831	792
167	956	1020	542	909	811	995	1919	973	1008	1075	781	926	546	1079	1324	165	431	681	1138	606	920	990	1372	1929	644	900	786	661	1260	760	1069	666	167	372		574	940	712	885	1226	1515	1451	816	838	1528	936	1279	907	606
168	459	882	553	1023	942	870	2089	1055	850	1141	843	657	431	1137	1522	112	312	655	1078	613	1044	786	1338	1759	683	1102	1052	696	1426	683	1222	930	146	408		713	920	680	917	1284	1539	1680	705	956	1317	811	1211	874	920
169	675	807	663	914	960	1020	1853	935	852	1425	675	910	597	1232	1557	252	265	629	901	743	1007	974	1249	1849	522	975	940	858	1244	448	1139	894	176	374		903	1103	591	806	1244	1511	1622	810	723	1369	988	1330	656	1007
170	702	1071	755	894	992	1017	2014	1058	798	1173	649	638	553	1283	1539	158	655	807	1113	915	892	882	1113	1930	537	809	872	774	1325	582	1204	1032	117	269		480	915	773	800	1373	1494	1510	752	793	1292	766	1093	797	754
171	604	1055	759	989	807	1125	1876	997	754	1259	756	881	590	1211	1431	232	308	717	1040	713	944	804	1082	1759	553	673	1047	651	1167	555	1302	845	194	416		596	886	857	662	1138	1442	1616	708	834	1448	961	1226	859	758
172	641	872	639	922	823	1087	1835	932	855	1303	553	782	772	1117	1549	-73	167	822	804	708	960	856	1081	1841	474	954	816	543	1120	604	1208	718	-1	426		519	987	713	1107	1299	1597	1883	887	762	1242	921	1240	741	858
173	660	1088	867	1033	844	1165	1825	962	869	1209	617	922	481	1240	1634	262	397	535	837	764	922	841	1201	1997	660	981	888	614	1110	479	1267	644	196	278		717	1012	617	789	726	1740	1639	764	792	1405	912	1138	674	1029
174	777	1052	808	953	750	1098	1964	897	1085	1371	671	1114	382	1362	1572	128	322	683	1152	766	1029	970	1347	1954	627	860	890	848	1042	754	1339	1009	249	555		873	952	570	854	1209	1979	1750	642	792	1387	883	947	810	1141
175	837	1086	659	970	751	1080	2025	976	993	1194	787	1055	889	1074	1589	203	297	703	956	761	939	750	1142	1590	506	965	1017	506	998	583	1317	784	262	385		441	1055	764	697	1112	2263	1757	667	585	1388	900	1036	798	1515
176	676	821	683	1014	920	1103	1757	815	1004	1259	615	1039	770	1263	1517	311	284	552	875	680	971	784	1155	1759	658	879	956	796	1013	661	1310	1038	463	358		738	982	639	878	1231	2619	1499	710	963	1258	973	901	788	1199
177	751	1123	844	943	957	961	2039	741	769	1162	775	988	597	1239	1281	219	321	592	1082	773	914	878	1017	1691	679	1098	904	593	1006	460	1112	909	320	380		624	981	655	1023	1351	2745	1844	598	1023	1418	809	1077	715	1341
178	565	967	750	942	800	873	1745	800	800	1280	785	1159	566	1085	1307	94	418	716	1126	620	1047	931	1048	1754	593	905	930	706	1139	544	1186	833	276	274		411	982	728	756	1211	2594	1704	754	943	1196	789	953	722	1355
179	702	946	721	973	732	1171	2079	785	846	1270	791	1037	854	959	1236	97	406	664	1260	750	918	1018	1151	1690	552	886	935	456	1146	604	1236	781	83	338		543	881	827	803	1166	2518	1704	532	786	1255	812	880	749	1388
180	820	947	630	792	781	1022	1873	787	907	1214	677	1092	527	1141	1169	337	371	752	1161	493	962	869	1346	1454	668	860	978	658	816	736	1338	733	246	357		558	1031	829	1031	1322	2664	1589	619	1091	1433	859	909	816	1189
181	769	1125	712	818	742	976	1916	779	1088	1144	639	1044	661	1147	1666	291	428	666	1114	745	972	813	1186	1595	541	1082	1030	765	741	671	1043	870	92	356		638	1107	674	821	1269	2549	1657	716	706	1307	835	1011	899	1240
182	626	941	567	987	988	1090	1776	857	960	1282	851	1036	380	1194	1829	233	475	644	1114	627	847	904	1350	1593	614	1212	955	689	760	746	1290	876	211	256		616	1266	661	965	1084	2362	1589	616	1121	1287	594	871	893	1153
183	673	1136	786	943	780	1017	1830	865	782	1260	753	942	468	1036	1622	52	277	651	985	717	787	946	1181	1540	524	875	1027	803	808	725	1022	860	231	294		634	1154	630	857	1578	2505	1877	764	943	1393	590	746	720	1381
184	531	1016	754	955	841	1104	1795	591	854	1089	694	990	427	848	1425	131	279	560	1041	782	1066	951	1223	1859	494	885	898	536	702	871	1073	822	278	351		754	1286	703	960	1132	2222	1724	759	716	1391	777	811	596	1110
185	732	752	681	887	1013	925	2210	780	791	1157	697	896	337	918	1039	206	191	520	993	681	936	834	1222	1353	500	1019	1047	586	995	645	940	612	165	418		581	1240	546	985	1024	2194	1723	779	1034	1256	736	744	710	1454
186	774	1138	589	877	894	1045	1953	764	816	1134	773	790	546	1175	779	19	439	545	1032	713	1009	831	1213	1607	536	984	841	643	784	737	1179	780	109	317		657	1125	688	1024	1105	2269	1580	915	873	1243	817	818	625	1220
187	679	917	765	814	799	1074	1677	831	874	1001	801	828	569	958	976	94	358	750	1116	681	1031	765	1066	1520	664	826	905	969	705	801	976	714	128	290		782	1079	821	985	1230	2130	1809	761	837	1295	810	830	672	1198
188	862	1000	782	921	880	1003	2087	676	943	1335	727	904	434	1071	1094	424	280	653	1105	730	844	842	1142	1454	529	1051	966	590	622	779	1128	650	177	262		672	1334	729	955	1142	2025	1788	1203	929	1190	743	712	787	1271
189	845	905	805	801	966	955	1622	700	713	1056	888	677	508	1125	833	212	366	690	1282	719	777	895	979	1675	633	1006	943	578	803	803	969	640	209	362		517	1199	721	1057	1106	1863	1546	1010	886	1224	788	854	843	1134
190	409	838	776	802	859	1036	1494	638	890	1132	760	744	486	905	949	207	385	691	1033	682	956	946	1004	1742	636	791	968	520	655	685	1120	1003	161	241		541	1081	765	850	1112	2050	1569	1246	921	1360	633	767	1018	1139
191	722	897	839	1004	765	932	1783	562	767	1097	721	661	630	1098	937	108	369	675	1206	531	938	914	1116	1576	528	1023	994	702	715	550	950	965	347	387		582	1054	739	831	1149	1994	1759	1175	1014	1263	718	680	804	1113
192	626	1093	555	898	757	1052	1773	702	1149	1080	624	870	486	1084	798	220	340	882	1031	733	1051	877	1053	1768	567	841	1101	857	699	450	1026	1044	117	228		520	1130	827	969	1131	2001	1632	1260	737	1352	824	705	725	946
193	674	945	625	843	904	928	1876	785	1146	1043	485	767	574	933	1069	221	294	624	1159	631	811	828	1034	1520	682	924	894	821	654	470	968	841	125	227		447	966	784	932	1228	1596	1713	1125	857	1343	699	688	668	944
194	614	891	579	825	899	1049	2005	518	863	1170	774	844	527	1006	962	70	286	732	1061	687	1040	936	1147	1827	621	619	937	778	603	585	1064	819	126	308		587	993	752	808	1024	1936	1844	1231	863	1304	644	734	800	1220
195	557	944	377	781	730	1091	1852	748	979	1123	727	735	497	974	1360	202	290	718	961	689	1066	818	1074	1710	595	803	1005	604	546	572	1120	932	281	254		690	1148	799	926	1008	1852	2027	1381	972	1321	794	708	657	1118
196	694	1212	473	1017	802	1021	1845	753	946	1241	860	646	499	1111	1597	209	300	531	1067	643	887	786	949	1414	628	941	1308	715	674	696	999	761	137	492		367	1124	713	915	976	1698	2172	1251	953	1402	770	742	932	888
197	571	786	642	969	834	934	1800	720	823	1205	724	679	399	792	1407	153	349	508	1080	755	875	917	1092	1538	694	896	1328	578	759	563	1020	949	245	328		408	1025	918	990	904	1775	2282	1428	788	1303	718	700	675	928
198	609	866	821	958	904	920	1771	749	907	1065	887	756	589	895	1167	98	458	938	1224	764	831	750	959	1547	617	895	1249	678	598	666	827	971	167	255		588	1056	1135	998	1310	1636	2121	1265	829	1252	732	614	845	1109
199	509	960	664	848	830	959	1995	656	1093	1241	755	567	420	1119	1651	242	348	653	1024	702	826	966	1200	1906	674	942	1294	498	696	551	1101	1004	318	236		756	962	1011	912	1146	1699	2125	1318	871	1367	757	957	608	804
200	472	886	578	1222	882	954	1641	602	1332	1161	704	842	510	985	1448	213	302	706	1288	1066	903	829	855	1859	585	1075	1217	794	674	476	1162	1118	131	371		678	1166	1510	919	1228	1543	2039	1357	783	1226	825	907	722	1238
201	597	995	735	848	845	1085	1632	717	844	1274	692	604	515	1119	1653	181	315	728	931	494	872	1001	1130	1819	627	1070	1082	629	860	739	910	1190	365	265		474	982	1682	891	1206	1538	1940	1378	1015	1427	735	893	829	1303
202	635	817	920	968	751	1005	1611	587	816	1123	783	678	461	928	1481	122	245	737	889	541	563	946	1067	1631	621	931	1464	760	471	480	1025	1189	259	212		520	899	1774	877	1137	1524	2028	1413	854	1416	819	1030	774	1010
203	580	1142	842	934	940	1093	1762	682	832	1294	613	877	183	901	1133	255	412	622	987	623	1045	875	1009	1546	512	988	1195	664	603	569	953	1053	379	351		579	983	1677	908	1096	1785	1952	1248	716	1237	899	996	873	989
204	696	1176	555	998	761	989	2000	677	934	1311	869	824	594	1262	980	293	420	803	893	852	855	877	1034	1585	640	964	1376	807	679	501	1083	990	297	395		403	982	1769	1129	779	1563	2014	1196	855	1566	931	973	915	926
205	707	918	832	928	960	1034	2085	665	891	1134	812	751	574	902	1150	193	327	788	1154	530	743	920	1250	1787	576	945	1137	632	565	652	900	1081	245	347		633	942	1651	1108	833	1731	2123	1282	741	1638	927	1177	743	764
206	455	1084	826	1010	885	1144	1932	618	980	1166	720	954	692	998	816	142	601	616	825	707	845	758	992	1651	567	977	1354	655	702	657	936	1090	182	454		709	1076	1805	937	655	1756	1910	1316	989	1437	777	1368	525	959
207	629	1228	747	877	875	1070	2038	578	840	1218	654	1115	671	902	1063	167	669	873	1054	689	784	961	1269	1601	751	870	1402	725	649	506	950	1009	110	417		552	932	1851	919	586	1382	1840	1237	1081	1440	970	1445	807	943
208	743	846	629	992	902	1093	1850	507	1040	1088	594	1192	783	1038	1104	176	718	613	940	827	858	963	939	1513	622	923	1288	758	569	784	1126	1181	217	229		486	949	1853	864	1449	1571	1958	1303	1077	1463	827	1233	669	1209
209	748	998	570	765	779	978	1813	634	1000	1080	810	1161	542	1100	1150	110	458	661	726	608	876	837	1168	1737	655	833	1427	931	585	573	786	967	268	177		607	1057	1909	992	1354	1411	1887	1239	845	1402	745	1249	942	1682
210	630	974	841	905	941	886	1776	608	1161	1139	673	1367	577	1059	1247	253	754	689	1042	646	952	821	1093	1695	691	849	1482	656	582	714	712	1225	344	334		643	977	1787	1163	1357	1430	1932	1342	881	1389	824	1041	718	1984
211	652	974	725	788	873	964	1644	593	1198	1262	779	1298	496	914	1032	-65	701	687	970	771	910	754	1023	1747	618	1109	1374	676	567	906	1040	1418	186	274		567	727	1754	985	712	1442	2080	1309	917	1544	827	1301	756	2288
212	619	956	860	814	962	815	1829	751	967	1211	757	1385	608	968	1249	223	1100	669	934	677	913	779	1027	1559	660	834	1414	470	710	596	780	1426	377	322		478	940	1560	844	1337	1630	1832	1222	866	1409	868	1163	751	2329
213	792	965	733	1003	830	964	1971	700	1133	1178	543	1304	717	950	1187	234	800	602	832	702	929	917	1072	1469	594	982	1460	677	593	532	945	1101	303	267		679	835	1584	896	1436	1689	1953	1278	943	1433	754	1123	548	2253
214	521	822	889	975	856	1078	1957	685	940	1103	711	1414	502	954	1130	88	847	641	979	684	975	832	1095	1571	520	1024	1415	745	638	769	923	1291	186	283		578	930	1583	863	1307	2170	1895	1354	989	1536	936	1177	733	2197
215	644	933	714	877	927	917	1759	659	1163	1282	699	1330	546	1177	949	227	1023	440	639	489	995	822	1029	1703	566	809	1588	646	493	622	773	944	220	236		395	886	1764	700	1341	2213	1814	1161	936	1466	946	947	743	2227
216	508	971	648	852	730	1009	2020	586	871	1231	635	1387	605	1023	983	28	833	499	963	815	817	1007	989	1407	707	1182	1513	656	581	510	956	953	324	369		621	928	1521	912	1200	2256	1977	1246	718	1462	817	1165	936	2097
217	554	909	649	999	832	975	1931	633	1055	1242	576	1359	553	859	768	252	783	674	916	643	874	922	1061	1896	533	1081	1403	667	620	575	901	848	167	398		468	831	1445	835	1177	2121	1934	1095	818	1418	1026	1035	890	1847
218	719	1093	639	862	856	1155	1933	721	1081	1250	753	1209	468	921	918	181	853	806	811	681	750	875	1053	1791	719	983	1710	584	810	604	946	1018	262	190		575	874	1455	891	1226	2054	1807	1019	890	1429	805	1135	730	2008
219	599	983	545	772	924	919	1608	844	1179	1177	729	1054	606	1050	893	62	684	602	885	550	1017	873	1055	1887	773	920	1708	711	389	721	1005	1063	388	418		599	817	1444	986	1198	2070	1831	1223	879	1392	858	1038	838	1876
220	724	1201	591	858	903	1132	1614	606	862	1140	864	995	472	1095	1122	272	660	655	959	499	882	890	850	1811	594	1107	1589	716	491	871	859	1044	27	293		632	741	1494	936	1096	1988	1822	1133	822	1470	964	1024	845	1883
221	826	1113	556	810	827	1108	1663	636	949	1300	652	1141	376	1025	1343	78	806	647	841	648	903	693	1153	1610	607	1160	1518	668	489	660	980	1128	197	200		436	798	1383	926	1361	1996	1684	924	747	1291	755	1176	595	1917
222	532	1063	758	906	867	920	1871	823	1117	1171	831	837	597	840	744	158	742	619	838	767	909	894	996	1771	583	1198	1588	685	679	554	911	988	256	234		553	762	1466	839	1096	1848	1835	961	790	1356	794	952	839	1689
223	815	941	733	981	934	1197	1992	810	997	909	778	1108	455	1103	1144	12	650	664	761	568	851	874	1011	1753	620	889	1533	774	726	718	941	883	156	171		668	812	1389	760	1176	1806	1720	941	653	1320	889	1122	869	1831
224	826	953	571	897	830	1015	1976	843	1136	1137	714	986	544	810	1211	110	657	673	825	679	1028	965	1180	1575	724	1116	1655	541	501	617	969	902	194	333		696	924	1198	1002	1077	1764	1916	950	938	1440	690	795	861	2044
225	663	1110	883	1063	957	869	2077	728	1127	1047	753	1193	471	913	1176	171	689	609	850	763	980	723	922	1758	557	1073	1558	692	652	598	891	780	161	231		449	745	1278	935	1056	1801	1780	849	829	1300	842	734	771	1692
226	694	883	903	834	876	1051	1651	929	583	1166	683	920	627	970	1041	63	498	551	835	700	937	994	1071	1650	501	1005	1634	770	468	765	755	740	27	406		624	757	1172	918	1009	1660	1738	1078	857	1272	854	833	632	1680
227	497	985	658	872	916	1137	1609	898	893	1137	763	1226	429	1098	819	-2	539	720	802	639	940	834	1052	1550	729	1237	1599	819	543	547	1118	815	131	247		601	861	1290	1066	982	1666	1829	722	783	1228	926	749	846	1745
228	604	1170	643	707	885	973	1730	812	893	1184	531	982	356	782	1220	88	474	596	945	742	828	876	1032	1609	595	1390	1523	787	483	613	1032	694	322	359		524	717	1157	991	880	1543	1743	872	868	1399	857	779	826	1491
229	516	1084	746	915	844	1084	1979	622	920	1190	630	923	305	1014	894	81	523	660	910	734	886	867	956	1478	654	952	1405	587	550	760	1039	769	182	260		347	1013	1202	753	998	1540	1947	798	839	1154	891	655	824	1710
230	610	886	803	814	814	1083	1557	729	941	1081	689	950	572	976	918	226	522	787	976	726	1001	874	902	1645	711	1145	1653	849	539	519	1130	828	336	425		550	924	1094	976	876	1451	1576	752	779	1291	792	716	860	1721
231	517	1005	587	851	849	944	1817	757	809	1188	709	764	563	984	802	171	438	683	889	656	929	928	1003	1781	661	1072	1433	569	438	671	952	822	134	376		574	834	914	983	936	1549	1800	824	889	1313	804	700	715	1683
232	758	969	781	838	842	1126	1719	747	870	1175	669	865	400	1066	803	233	371	707	714	615	910	875	1100	1836	578	1107	1351	708	483	655	942	682	142	445		522	889	1073	953	943	1358	1643	710	898	1282	831	653	612	1345
233	693	1156	771	765	960	1118	1843	690	827	1072	666	724	547	881	787	218	354	583	867	770	996	786	960	1430	687	1085	1490	885	701	749	874	766	351	335		519	793	625	865	881	1432	1798	835	926	1301	1026	835	766	1459
234	657	1032	589	943	890	1078	2024	626	824	1276	882	872	561	871	864	292	561	710	918	508	962	855	1006	1694	512	1030	1496	642	487	705	999	889	227	332		560	911	896	946	872	1472	1828	875	1007	1143	796	642	834	1624
235	708	1085	726	870	830	1099	1899	683	772	1130	501	797	552	986	896	299	464	617	929	671	1052	724	996	1620	608	1126	1586	621	489	611	943	862	335	298		376	792	956	881	923	1159	1663	676	996	1420	820	761	664	1371
236	496	1113	926	796	935	1176	1647	580	800	1264	643	888	494	1036	927	252	250	551	833	705	932	929	1284	1890	576	1205	1348	642	573	520	870	959	167	273		543	976	721	735	794	1238	1934	668	851	1317	866	566	791	1317
237	589	797	717	1031	787	1018	1682	649	688	988	765	786	454	1176	1053	57	399	870	833	850	897	818	1160	1583	659	1009	1318	679	603	687	822	873	186	454		453	934	905	805	859	1405	1718	718	907	1360	912	649	871	1306
238	570	1159	772	983	936	1126	1817	676	931	1237	625	807	406	945	1027	249	423	843	829	507	1055	1058	984	1534	491	1303	1441	632	556	672	1088	662	375	239		506	865	1018	850	842	1488	1715	760	863	1162	851	655	714	1464
239	571	975	678	759	761	1042	1700	612	789	1182	660	804	460	742	1060	310	454	571	851	807	793	777	1071	1696	439	1161	1439	727	559	591	963	976	256	382		323	877	771	982	932	1330	1860	636	1003	1124	928	509	778	1400
240	682	1020	560	1261	782	1048	1853	574	1031	1160	651	774	387	1088	758	195	471	613	761	507	935	1010	1031	1588	505	1163	1397	761	491	858	803	643	253	200		527	945	871	906	729	1230	1870	550	1086	1240	962	741	686	1257
241	713	986	857	1028	798	993	1787	653	809	1110	610	933	301	960	904	257	373	617	894	608	998	847	1005	1555	561	1164	1426	789	548	439	1022	802	214	403		607	925	879	909	771	1119	1720	651	990	1214	974	592	691	1141
242	448	905	946	884	801	1138	1941	487	1005	1049	664	686	634	992	882	78	392	650	929	877	883	913	938	1799	633	938	1356	780	496	567	1062	786	239	349		672	880	811	900	873	1359	1616	557	896	1127	867	778	869	912
243	796	968	843	757	906	1085	1892	790	788	1208	599	741	489	929	840	72	378	769	832	656	1050	850	1308	1749	616	980	1439	451	464	670	953	869	196	435		500	957	798	853	726	1053	1679	734	1118	1105	808	621	744	1145
244	582	1169	667	936	923	1191	1648	591	717	1093	623	929	714	878	801	201	454	648	852	617	953	906	1182	1526	588	894	1310	724	580	721	1196	791	126	371		527	795	898	794	847	1167	1679	603	876	1202	1023	577	896	978
245	596	1067	844	824	830	1266	1864	686	847	1245	780	644	535	962	881	59	141	540	1087	664	960	910	1201	1633	582	1168	1319	786	541	478	794	839	14	244		477	902	1097	1069	842	1251	1929	511	1033	1119	909	597	824	1342
246	770	908	556	869	899	1034	1755	692	806	1058	731	715	564	961	824	213	358	661	816	706	787	837	1012	1764	492	943	1304	735	746	745	925	807	137	508		330	1062	836	815	609	1152	1588	667	1033	936	738	660	878	1015
247	679	1148	715	858	924	1006	2002	773	725	1425	608	866	440	995	825	55	330	417	877	709	840	917	1003	1898	723	986	1358	870	568	533	928	888	317	453		452	908	898	870	698	1155	1696	594	837	1147	858	655	660	1331
248	934	962	622	849	813	1270	1958	612	819	1127	734	871	404	862	693	104	266	747	829	894	926	841	1000	1518	655	909	1318	519	540	770	1202	797	94	220		514	988	516	789	871	1082	1593	497	917	1143	889	556	613	1050
249	641	1015	781	801	824	1041	1821	601	952	1238	685	612	570	1167	623	241	192	720	1001	663	899	903	1070	1933	682	1200	1301	690	741	651	969	954	44	397		432	873	799	800	897	1133	1996	636	920	1241	781	589	633	966
250	745	1004	854	837	765	1216	1930	610	741	1166	522	793	448	883	706	156	468	780	959	563	826	799	900	1543	600	1159	1056	665	670	548	1094	808	208	269		579	791	704	773	748	1210	1617	690	1236	1236	883	432	769	1082
251	729	1126	612	981	919	1133	1463	630	977	1034	864	683	728	876	796	248	347	692	944	618	951	904	922	1675	682	1207	1173	774	729	691	1081	974	261	263		626	868	894	922	784	1087	1767	533	809	1335	838	697	841	842
252	617	1028	611	884	897	1095	1752	655	745	1240	706	635	503	900	1002	303	233	912	909	617	1060	739	892	1940	726	930	1343	656	591	762	946	1267	-9	152		388	837	714	828	929	1055	1665	437	1079	1173	872	561	723	1110
253	517	1023	680	779	819	1177	1609	658	949	1052	666	643	503	966	775	312	270	698	949	765	861	854	733	1487	606	1041	1216	927	696	705	1063	1165	116	378		659	821	636	855	753	1085	1805	512	1042	1255	833	416	711	955
254	592	789	624	904	789	1079	1844	666	1015	1003	605	851	591	1032	870	54	278	757	900	805	901	924	1044	1862	583	1071	1063	660	758	572	802	860	11	351		459	1010	685	677	902	1198	1769	578	855	1249	864	698	631	940
255	670	887	686	793	829	1171	1793	570	704	1098	735	719	495	774	791	131	274	786	882	875	1003	914	858	1511	541	942	1263	700	596	801	1038	1131	152	469		518	1036	709	1000	718	1107	1625	481	997	1216	818	525	758	1013
256	665	1198	526	848	885	1254	1866	740	608	1256	627	690	466	860	889	183	516	626	940	569	892	756	954	1543	619	1034	1285	861	669	665	992	1032	229	142		565	772	721	814	793	1196	1667	460	642	1243	861	548	698	1081
257	740	929	431	883	714	1148	1757	624	866	1179	769	653	501	1118	899	-36	312	767	1038	861	952	845	1004	1715	753	1007	1329	714	661	510	1026	1192	298	313		422	844	588	915	832	1175	1796	658	754	1254	973	536	898	993
258	659	1058	848	742	758	1150	1725	921	1023	1220	576	750	441	1036	848	179	323	657	953	600	740	969	988	1909	560	1191	1164	723	601	599	1089	884	58	446		588	818	794	1057	697	1054	1851	538	1108	1084	953	570	901	975
259	661	945	622	901	852	1037	1840	1047	829	1132	796	437	331	798	668	286	482	801	782	489	1015	811	1110	1751	579	1202	1257	603	715	613	1073	855	73	315		436	1034	442	921	884	1113	1572	479	953	1009	887	534	714	816
260	757	1277	820	875	783	1154	1974	933	809	1173	726	641	654	1010	860	263	455	696	796	827	928	868	956	1780	555	964	1208	597	689	733	878	962	224	308		619	955	702	977	907	1047	1732	491	890	1134	896	689	748	938
261	783	1028	829	848	756	1060	2100	978	908	1047	738	783	482	1036	1149	252	287	681	873	717	946	960	1076	1545	659	1206	1158	643	598	645	833	1086	367	414		579	1033	782	852	904	1079	1598	621	1074	1120	857	651	678	883
262	777	1048	566	872	884	1131	2071	827	950	1052	794	725	549	946	958	227	442	596	980	664	983	885	1031	1797	541	894	1245	670	606	647	1020	889	230	296		356	853	659	806	949	1151	1671	635	1088	1225	916	608	691	978
263	688	1108	525	798	650	1128	1929	904	793	1162	689	515	454	842	738	153	324	663	928	731	937	924	932	1684	683	1019	1162	850	583	584	1107	991	128	186		429	941	735	880	841	1061	1865	624	800	1096	822	647	717	903
264	729	1105	765	782	804	1202	1984	947	889	1209	774	812	668	917	638	99	333	772	951	852	954	795	988	1615	728	972	1107	540	611	626	952	824	162	197		649	974	673	926	746	879	1802	502	999	1095	837	730	749	817
265	695	1117	746	981	860	1207	1834	984	658	1120	689	630	631	1071	713	148	303	681	924	699	1010	812	1264	1741	568	926	1213	671	595	662	1045	968	221	409		691	845	696	663	733	962	1762	750	1015	1116	822	504	885	664
266	441	1193	796	912	692	1102	1928	872	1040	974	756	683	606	998	594	245	338	725	1012	559	889	839	1451	1717	592	1181	1261	819	679	636	1116	998	154	329		747	875	705	1009	825	925	1601	480	526	1125	751	462	702	838
267	650	1182	750	1019	886	1159	1638	845	1021	1145	765	565	479	775	544	209	341	797	899	827	958	850	1111	1710	589	1077	1256	636	588	721	1039	830	215	258		625	912	760	1017	784	908	1691	716	842	1199	912	644	928	899
268	741	1141	918	674	1044	1249	1797	997	888	1202	805	579	694	938	894	181	507	628	957	777	883	767	962	1765	608	992	1073	1030	617	672	1120	867	162	152		610	904	723	876	863	1009	1789	623	683	1034	808	315	778	1043
269	490	828	874	863	912	1115	1883	1085	941	1195	786	640	438	886	987	276	281	586	904	658	944	731	894	1623	569	1094	1047	624	539	578	869	968	203	336		637	849	558	1093	770	956	1801	616	1044	1224	869	625	842	853
270	721	1014	580	686	801	1191	1962	1097	699	1100	608	788	631	1103	649	257	310	571	838	329	870	849	882	1453	607	1149	1350	632	452	624	879	915	173	287		743	834	597	1090	800	1170	1732	570	924	1155	814	457	737	1088
271	764	1107	526	738	862	1153	1921	873	913	1253	757	668	602	866	805	33	539	654	987	811	951	907	929	1566	639	1107	1112	746	540	566	1253	866	207	432		804	871	788	978	803	974	1579	496	897	1105	822	608	797	676
272	725	1088	478	963	767	1158	1754	1059	902	1117	830	696	367	952	789	230	337	688	1045	512	987	796	904	1656	681	1024	1237	850	609	713	1202	898	270	334		598	838	806	845	674	1137	1693	675	1104	1016	1013	484	810	931
273	646	889	801	868	943	1206	1906	1001	842	1311	851	625	734	944	758	256	434	570	828	752	807	762	855	1634	418	891	1228	714	656	581	1290	894	252	445		600	852	592	1166	841	1084	1660	592	943	1065	820	488	658	810
274	610	947	591	873	808	1086	1915	1057	806	1344	863	580	549	782	859	299	487	692	908	562	1055	805	971	1696	538	731	1138	837	808	655	1207	821	273	458		646	1099	705	732	906	1096	1770	616	1107	1225	942	408	717	808
275	843	1082	576	869	725	1089	1981	1015	1125	1133	594	759	476	938	713	101	390	701	729	732	965	708	1238	1818	639	1052	1378	715	603	595	1048	865	265	344		703	984	746	867	633	873	1353	567	848	1045	823	543	752	892
276	713	819	781	815	814	1155	1988	980	791	1144	586	622	368	856	619	224	408	719	957	779	1011	842	1301	1926	677	1189	1290	648	848	719	1022	965	58	331		719	960	801	838	779	1010	1697	563	905	1173	947	529	753	799
277	586	999	756	1053	830	1064	2001	982	673	1064	692	652	442	935	807	281	384	624	907	639	886	794	1242	1819	727	1046	1239	645	550	612	992	787	221	253		635	838	758	770	831	1042	1679	527	875	1138	1041	471	852	700
278	656	894	732	837	759	1140	1979	889	1049	1169	569	799	666	953	807	226	393	785	890	488	834	1069	795	2073	641	750	1256	563	592	518	1049	904	160	281		727	935	667	739	793	894	1799	497	1104	1107	977	657	954	772
279	669	781	788	747	793	1109	2052	963	1016	1262	865	773	666	1071	731	139	464	657	987	875	833	896	1030	1979	646	1038	1194	906	545	523	1097	959	-21	426		679	1034	767	883	934	1158	1735	560	709	1038	996	557	927	622
280	595	1064	560	1014	826	1212	2077	947	768	1017	689	823	453	1042	594	234	298	817	981	648	1120	788	900	2290	602	961	1305	605	472	559	1264	880	147	566		710	818	520	819	697	960	1767	635	929	1178	908	580	659	759
281	709	1135	759	857	784	1039	2007	943	898	1117	742	522	607	1047	681	62	403	652	828	494	841	830	1376	2294	555	1117	1172	811	554	645	1141	666	89	445		613	806	736	1044	763	1155	1523	644	1056	1058	1089	466	760	664
282	609	1045	873	833	768	1123	2028	928	765	1163	627	662	459	899	583	137	355	620	950	732	998	912	954	2477	554	916	1281	700	669	789	1409	982	277	300		710	866	668	635	954	1004	1717	590	1100	1022	885	569	908	918
283	642	953	627	1050	569	1129	1926	948	789	1086	745	784	503	918	863	137	342	663	823	674	786	856	1014	2155	581	910	1149	691	646	739	1332	912	290	484		719	828	416	1083	730	885	1765	401	1053	1152	860	493	851	767
284	686	1086	730	930	901	1242	2049	967	839	1116	830	703	526	917	793	170	94	852	904	857	844	803	1144	1849	531	680	1010	709	586	424	1236	996	162	409		565	905	613	750	751	1031	1436	402	1001	1257	979	547	708	716
285	730	993	758	860	758	1067	1934	693	799	1217	717	529	478	778	725	196	259	622	758	837	804	827	1156	2360	658	937	1138	586	606	633	1017	1009	278	95		599	821	635	1067	953	1143	1580	422	1053	1058	961	569	975	883
286	407	984	571	959	833	1124	2127	1055	822	1029	711	593	383	1040	674	66	321	527	939	670	994	796	1160	2174	689	1008	1120	499	646	557	1229	884	453	262		655	828	576	969	738	1190	1838	460	1156	970	729	361	890	766
287	688	977	717	971	833	946	2178	712	845	1296	686	650	539	918	762	378	494	771	827	500	1168	609	1264	1959	639	1047	1308	519	499	773	1205	836	4	277		689	924	620	740	741	892	1609	550	962	1147	895	549	777	832
288	638	960	511	977	1010	1209	2130	816	804	1297	565	647	614	1012	623	274	367	692	1059	635	862	759	1206	2305	654	860	1292	541	448	625	1354	1098	157	280		726	925	788	873	850	1069	1637	475	1099	1054	873	524	940	793
289	783	995	673	890	768	1152	2019	809	835	1074	821	529	598	731	781	218	200	785	835	681	875	900	1188	2351	595	966	1281	657	593	609	1299	974	84	245		509	769	694	642	742	1010	1763	606	1071	1216	937	432	747	882
290	540	892	903	771	890	1052	2171	810	657	1253	794	889	604	1066	731	130	225	496	886	315	1022	719	1334	2094	654	1215	1199	535	658	647	1279	884	94	234		669	976	644	862	766	1066	1685	559	1000	1154	901	730	671	834
291	499	872	695	940	880	1047	2170	855	705	1094	708	694	637	977	634	158	270	568	927	844	843	819	1050	2292	668	956	1122	741	656	787	1274	928	104	332		573	883	605	882	866	1149	1506	535	1225	1104	847	597	839	726
292	563	842	623	981	902	1171	2070	676	992	1030	549	590	557	871	837	360	391	785	867	763	953	863	1241	2297	528	829	1205	538	539	776	1185	913	251	257		576	862	472	836	675	957	1787	459	1053	1073	869	549	814	680
293	701	967	577	798	735	1046	1895	888	806	1114	726	575	463	928	741	9	309	487	1063	596	933	799	1223	2301	781	1153	1341	626	598	650	1113	914	327	133		646	815	501	745	908	866	1721	700	1141	1116	1007	680	653	687
294	481	1221	908	830	877	986	1848	852	1076	1180	518	797	396	1047	943	55	427	647	691	504	906	809	1095	2386	633	1107	1139	720	539	546	1288	1017	96	496		782	989	761	949	701	982	1703	443	1011	1082	985	519	816	873
295	685	874	789	758	784	1177	1885	760	931	1269	721	662	460	835	776	100	332	581	935	730	863	809	1281	2102	622	911	1223	655	526	719	1237	941	248	306		732	876	547	979	784	940	1663	635	1101	1149	879	468	837	702
296	848	1059	663	832	778	1011	1947	663	718	1025	733	454	434	1042	706	165	356	529	879	748	895	815	1276	2276	570	908	1062	533	636	557	1339	1141	147	165		632	788	448	1100	974	1097	1653	596	915	1361	922	530	753	984
297	752	1079	881	725	822	1126	2025	736	760	1165	724	699	311	1021	787	226	234	648	928	751	766	781	1191	1983	633	925	1329	681	610	649	1223	1014	234	470		694	900	539	824	891	931	1858	553	970	1033	897	478	770	816
298	399	937	749	732	867	1066	2102	781	792	1224	578	627	401	1105	853	122	421	570	1019	618	823	810	1306	1881	677	1130	1137	608	574	514	942	1028	128	242		634	911	755	831	831	854	1858	486	1035	1242	866	581	726	768
299	659	807	849	801	874	1077	2007	754	799	1111	708	638	685	1008	697	156	201	719	836	635	960	923	995	2217	557	1087	1196	595	640	452	1266	814	253	496		609	847	549	955	756	1156	1597	405	1244	1441	974	585	748	782
300	729	959	678	817	710	1120	1746	742	833	1033	803	622	584	945	751	222	296	564	1060	748	909	945	982	2174	656	867	1128	768	496	594	1188	1002	71	288		799	712	672	886	672	916	1632	519	878	1158	963	355	874	837
301	704	897	876	742	728	1101	1949	725	854	1069	592	597	473	1051	512	70	331	607	848	860	1122	798	1319	2113	652	963	1198	716	487	681	1152	839	353	342		679	764	637	1047	894	843	1747	612	914	1153	1026	641	878	1047
[truncated: 657 more columns]

## Sheet: AWAChr;AWAGC blue light
Figure 1S-1D
AWA::GCaMP2.2b F(A.U.)
Stimulus:	AWA::Chr																										AWA::Chr
Blue light level:	165 mW/cm2																										65 mW/cm2
N:	1	2	3	4	5	6	7	8	9	10	11	12	13	14	15	16	17	18	19	20	21	22	23	24	25		1	2	3	4	5	6	7	8	9	10	11	12	13	14	15	16	17	18	19	20	21	22	23
Frame (Pulses at 650 and 1250)
1	33270	37691	28187	50626	23454	67893	52283	78913	42474	49039	63462	73501	103972	18493	41842	28778	38850	29368	41642	31545	34136	21003	61828	78712	11973		22674	17138	16025	31448	14446	26514	4190	34048	25201	25981	31046	37742	55267	7912	20753	11497	27124	15345	21892	15274	17066	9613	33611
2	34292	39561	28328	50383	23573	68442	52377	79043	43221	41533	64298	72393	105337	19046	42293	28937	38137	29607	45491	31929	34772	20223	62109	78581	11163		23435	19812	15218	27961	13912	43552	19882	34500	24462	25735	31347	37518	55185	7824	22986	13190	26912	16408	21964	15342	15048	10004	34001
3	34572	40127	28643	51242	23679	68700	50429	79535	43727	41720	63953	73867	106529	18260	41995	28257	38008	29534	45760	31333	34949	20355	63431	79017	46953		23998	20032	15950	30477	14267	43979	20155	33602	26552	26272	34284	37432	56060	7832	22542	13355	26971	14880	21384	14831	15172	9931	33164
4	35162	41036	28708	52412	23017	69211	51523	80076	44757	41776	64827	73359	106099	18518	42048	28637	38541	29833	45826	30817	34931	20030	61776	78356	58999		24560	20482	15735	32871	14493	44413	20090	34947	27547	26232	34421	37578	56050	8003	20265	12084	27032	15596	21281	15305	15548	9173	33009
5	35256	40290	29545	52554	23172	69931	51341	81051	45225	49129	66103	72340	105739	18444	41341	28684	37887	29540	45504	30315	34413	19774	62494	78088	58523		25269	20610	15714	33808	14397	43786	20588	34498	26107	26507	34833	37734	57446	8102	22471	12061	26664	14812	21275	14942	15389	9913	33289
6	36113	41051	29818	53119	23237	70707	52168	81728	44240	48921	66301	71974	104612	18182	41514	28863	45136	29891	41407	30244	34680	20046	62805	78089	57955		25764	20369	16048	34725	14510	45153	20286	34954	28807	26500	35671	36954	57491	7727	20142	11900	26732	14851	21069	15160	15384	10081	32865
7	35303	40626	29819	55023	23127	70486	51441	82632	44870	41916	66646	72853	105594	18726	41569	28470	38334	29640	41908	30044	35018	19893	63099	77028	59335		26706	20401	16701	34844	14551	45557	20578	35344	29089	25912	35500	36920	58132	7782	20021	12161	26529	15746	21489	15119	15708	10041	33858
8	31888	40496	30692	54977	23022	71094	51585	83832	45573	48572	67311	73331	106869	18768	41842	28339	37882	29949	45819	30963	35221	20303	63047	77879	58338		27193	20728	17003	35470	14434	44907	20574	35298	26143	26062	35714	42991	58468	7877	20348	12853	27107	14788	20992	14865	14941	9377	33453
9	32509	41290	30306	56408	23233	71177	51150	83563	45550	41488	67671	72567	108261	18410	41713	28515	38246	29929	45294	30804	35018	20572	66889	77334	58168		27650	20783	17472	36532	14260	45154	21108	35790	29629	26521	34380	36992	57700	7891	22753	11764	20810	15304	20965	15340	15645	9125	34107
10	33887	41854	30439	57209	23264	71523	51586	88401	45099	48173	67809	72197	109026	18338	40966	28966	37370	29202	40826	30490	35535	20751	67304	76490	57492		27731	20588	17234	36766	13804	46465	20319	35907	25973	26701	34195	37056	58436	8091	22451	11902	27114	16253	20873	14965	15151	10198	33878
11	34240	41339	30424	58903	22869	72167	52306	88521	45419	47772	69404	72899	110066	18160	41372	28342	44557	30012	45707	30962	35200	20104	62951	75863	57722		28678	20982	17553	37113	14554	46421	21120	35562	30290	26322	34515	36939	57979	8086	22470	12008	26558	15204	21173	14864	15588	10067	34029
12	33829	31389	30999	59993	23329	70288	51437	88182	46807	42835	70116	71739	110499	18185	41255	28305	37162	29628	45535	31438	35393	20279	66796	76662	58365		29310	20621	17447	37977	13938	46846	20914	36307	30279	26108	35601	36266	57852	7851	22423	12091	26367	15276	21075	14825	15146	10126	33731
13	33290	35859	30790	61114	23127	71917	51110	89844	45728	42655	69305	72956	109438	18610	41372	28033	38220	29794	45136	32289	35190	20285	62312	76621	57635		29400	20687	17255	38227	13821	47001	20775	37328	31480	26161	36375	36295	58593	8572	20156	12072	19301	16573	20742	15091	15896	9733	32840
14	33709	37091	31024	61595	23075	71486	50753	89341	45858	49016	68888	71917	109213	18729	41674	28329	44657	30377	40842	32252	35085	20178	62522	76528	57312		30040	20906	17604	38596	13674	46556	20574	36928	31152	27008	37507	36705	59308	8059	22149	13135	26421	15826	21255	14973	15380	9611	33064
15	33685	37376	31332	62007	22257	69840	51375	85718	45686	49459	68369	72396	109244	18225	41332	28393	43600	29696	45789	32474	34684	19868	62852	75564	57923		30007	20425	17774	38622	13821	46988	20677	37158	31410	27064	37662	36828	59512	8316	22021	12061	20951	15081	20849	15224	15538	9460	33696
16	35244	37759	30579	63244	23170	71048	50653	85885	46424	48720	68029	71307	107671	18391	40920	28767	44137	29423	45649	32627	34534	19981	66636	76133	57362		29834	20420	17486	39257	14105	47879	20588	37152	28405	26924	37480	36147	59549	8253	19786	13010	26647	14975	20555	14826	15870	9746	33536
17	36084	37651	30782	64012	22851	71480	51376	89031	45924	48554	67976	71246	103830	19129	40865	28234	37986	29670	40423	32151	34705	20292	66932	75428	57205		30361	20686	17461	39947	14240	47816	21129	36881	32093	27198	36933	36329	60554	8257	19269	12971	26504	15980	20891	14766	15874	9630	33756
18	36130	37258	30451	64791	22705	69391	50962	89215	45778	48750	68724	72192	107524	18676	40752	28114	37778	29802	46153	31481	35208	20681	62931	75342	57649		30321	20012	17717	39619	13837	47704	21417	36976	32281	26968	34755	35907	60549	8470	20430	12617	26550	14727	21201	15157	15512	10355	33086
19	36440	36611	30825	65687	22639	69016	50978	86126	46595	48831	68825	71845	107579	18533	40919	28499	38085	30199	41503	31467	34948	21737	61923	75571	57151		30976	20582	17932	40671	13728	47937	21556	37169	32520	27672	36391	36067	60416	8920	19748	13028	26963	14805	22941	14856	15906	10502	32983
20	35403	36617	30251	66233	23737	69424	51153	85042	45640	48850	69083	70666	106739	19017	40754	28676	38066	29991	45746	31705	34602	20917	67831	75456	57515		31309	20634	17826	40316	14011	48535	20880	37233	32087	27330	36440	36069	60588	8559	22153	11866	24629	15887	21139	15512	15519	10566	33518
21	36368	36868	30825	66640	22354	68507	51219	88089	45971	44091	68703	71867	107333	18495	41119	28271	37855	29300	47077	31084	34832	21599	62942	74806	57710		31074	20273	17917	40629	13871	48537	20721	37060	32890	27127	33845	36614	60474	8633	19963	11603	26273	14949	20996	14686	15726	9912	32453
22	37042	36513	30932	67525	22854	67979	51296	84475	45622	49236	68822	71199	108682	18444	40965	28976	37404	29997	46336	30821	35828	21526	63496	74775	57198		31283	21090	18133	41417	13852	47649	21088	36731	32570	27386	37090	35972	60830	8472	19952	12708	23730	15100	21163	15040	15815	10959	33551
23	36303	36193	30557	66513	23726	69314	52030	88487	45847	48436	68861	71249	108173	18172	40815	28940	37272	30433	46129	30567	34655	20779	68262	74603	57554		31266	20548	17815	41500	13566	47142	20855	37003	32958	27593	36512	35980	59501	8585	19680	11739	26604	14907	21200	14841	15444	11029	33022
24	36401	41163	29901	66398	22899	68676	52251	87750	45480	49430	68426	71437	107849	16993	40980	28713	37265	29754	45935	31533	35512	20726	67811	75066	58301		31767	20951	18093	41697	13540	46803	20915	36753	33397	27102	36988	36213	59161	8259	19626	11794	26115	15199	22511	14211	15642	11553	33212
25	35438	40975	29152	66994	22794	68884	52606	87199	44757	49056	68810	71038	107980	18697	41270	29210	43650	29489	45499	31281	34940	20614	67510	75918	57073		31751	20536	18115	41832	13435	46911	20627	37154	29505	27059	36192	36107	57650	8122	20187	12741	20572	14735	20803	14779	15694	11371	33101
26	36232	40944	30034	66923	22560	69343	53160	87266	45277	48733	67376	71513	105098	18772	40896	29014	57009	30235	45699	30544	35168	21121	67071	75687	57466		31539	20979	18060	42051	13653	46390	20545	38054	32747	27089	37188	35549	57785	8442	21625	12812	26372	16088	21346	15041	15975	11175	32390
27	36408	41257	29778	67967	22189	69313	52997	88542	45285	48603	68508	71203	115782	18378	40580	28192	57230	29610	45147	30609	35006	21204	67635	75399	57908		31413	21193	17809	41552	13752	46749	20734	38340	33265	27553	38138	35503	58037	8400	20164	12961	25723	16014	20960	15145	15697	11251	32738
28	36069	36709	29710	67206	22440	68981	52178	86435	45288	49151	67732	70853	105205	18558	40617	28569	57318	30037	44907	30892	35652	21452	68243	75060	57786		31452	20501	18283	42798	13589	46877	20198	38048	33633	27622	38159	35971	57510	8444	22354	12729	26018	14992	20849	15125	15707	11736	32751
29	36224	38800	29537	68479	22179	68594	51452	86053	44942	48052	67301	70542	96982	18913	40297	28781	43650	29640	44921	30641	35550	23058	66993	74799	57680		31948	20681	18234	43645	13469	46617	20011	38089	33577	27470	38348	41429	57495	8490	19954	11874	26197	15146	20717	14971	15884	11130	32613
30	36254	39081	29955	67670	22524	68159	50926	87323	44472	49081	67780	70512	129488	18934	40128	28706	56451	29612	45212	29832	35179	22574	67208	75227	57671		32162	20747	18407	43431	13314	47075	20551	38834	30015	27189	39717	41325	57750	8667	20029	12654	20400	15035	20685	15171	15605	11742	31970
31	36667	38895	29109	68651	21823	68200	49822	87367	45465	49037	67205	69698	113526	18830	40524	29368	55939	29977	44630	30999	35975	23006	66992	74850	56822		31657	20365	18967	43466	13388	46436	20443	38021	34405	27327	38684	42883	58460	8738	22065	11633	26154	15539	22657	15249	15893	11316	32314
32	36041	38227	29780	68261	22399	67926	50907	84326	45260	49282	66589	71243	112302	18453	41078	28688	56122	30270	46113	30926	35928	22405	67162	75702	56953		31244	20720	18392	43654	13216	46500	20157	38492	33525	27626	40127	42582	58212	8489	21895	11524	20575	15172	20886	15093	15897	12281	32966
33	36176	37636	29258	68427	22254	68304	50115	85955	44595	50112	66906	70914	94465	18865	40056	28875	43517	30073	44841	30584	35631	22196	66834	74898	56685		31632	20695	18214	43873	13109	46602	20386	38660	33841	27048	39843	42350	57867	8273	20048	11445	25671	14507	22872	15393	17137	12049	32777
34	36047	36883	28712	68618	22549	68689	49546	84304	44797	49387	67281	69997	100656	19223	41175	28687	56730	30104	40740	30741	35264	23909	66503	75051	56692		31865	20657	18588	44586	13400	46737	19830	38244	33934	27749	39747	44275	58374	8375	20104	12739	26097	16081	22319	15034	16923	12614	32423
35	36050	36268	30096	67940	22500	68654	51275	83183	45520	50178	67398	70196	107769	19326	40293	29049	56528	30230	45006	31160	35427	22295	67416	74505	56673		31711	20081	18311	44969	13020	46229	19990	38832	29284	27441	39568	43560	60294	8742	19573	11562	23072	16239	20564	15234	17010	12872	32804
36	36142	36946	28580	69303	22636	68700	50115	85059	44312	50107	67686	69521	113283	18490	40399	29189	56106	29858	44353	31391	35178	22856	67019	74399	56814		32804	20387	18244	44994	13505	47259	20079	38215	34096	27757	39408	43270	60045	8692	20022	12459	23004	15306	20346	15338	15736	12154	32090
37	35174	36416	28779	68188	22970	68542	50445	84395	45096	49975	66306	70881	116927	18553	40439	29536	56116	29544	44808	30847	34899	23142	66430	75073	57533		32584	20536	18239	44719	13156	47552	19745	38117	30249	27591	39068	38224	61545	8820	21538	11716	25543	16108	20678	15149	15947	12815	32927
38	35424	36623	28654	68712	22252	69143	50617	84255	44849	44450	67103	70285	101845	17263	40214	29020	55801	29675	40819	31385	35477	22401	66175	73945	57338		32913	20511	18158	44838	13062	47502	20240	38942	34103	27225	39483	39396	62603	8661	20077	11623	19768	14867	21987	15157	16612	13390	32054
39	35543	36146	27989	69242	21900	69041	49774	83305	43701	50411	66528	70853	102688	18959	40383	28567	57040	29907	44543	31974	35300	23524	65645	74770	57006		32698	19921	18639	45166	13250	47930	19896	39122	33329	27773	40694	38262	62947	8430	19984	12686	19957	15200	20678	15024	16982	13058	32373
40	35829	36692	28626	69154	22370	68604	49495	83460	44518	49837	67547	70441	101167	19260	40735	28324	43274	30726	45567	31290	35744	23722	66486	73963	57667		32181	20651	17988	45771	13173	46805	20158	39134	30201	28096	40682	37663	62754	8711	19985	11415	19470	16121	20038	15236	15510	12530	31785
41	35360	36217	28234	69108	22773	68110	49806	82211	44265	43553	68049	70406	116022	19435	41249	29067	56037	30311	44518	31676	35242	24073	66762	75454	57437		32885	20720	18014	44920	13649	47404	19820	38632	30318	27886	41266	37483	63347	8559	19883	11743	19587	15881	20616	14916	16068	13549	31876
42	35254	36007	28216	70037	22426	69535	49830	85655	44541	49331	68286	70907	109001	19021	40900	28640	56379	29389	44474	31511	35085	22554	66159	73346	57695		32303	20015	18304	46131	12861	47672	20228	38885	30252	28082	42048	37444	62293	8943	19640	11718	19458	16207	20215	14904	16118	12828	31863
43	34652	36362	27678	69663	22352	67715	49612	83134	43792	44496	69216	71215	105685	19470	40926	28956	56610	30386	45023	31876	35338	22459	64974	74396	57362		31251	20303	18302	46049	12986	48224	20054	39199	34100	28432	41435	37082	62370	8444	20077	11479	19556	16091	19986	15498	15879	12488	32024
44	35106	36293	28439	70547	21977	69022	49556	82252	42923	49484	72007	70008	102491	18953	41455	28771	56391	29532	44879	31897	36118	22293	65928	74274	58203		30947	20259	18527	46096	12672	48001	19780	39106	31000	28426	40771	37577	61752	8256	19833	12087	19684	15285	22016	15404	15918	13817	32201
45	34761	32487	27858	70061	22275	68381	48798	83154	43449	48935	65580	70576	102019	18858	41784	28698	55773	30040	43919	32320	36453	22667	66084	74676	57377		31233	20147	18021	46317	13113	47620	19576	38987	34905	27951	40510	37622	61308	8358	19795	11550	19190	15042	20832	15218	15895	13265	32242
46	35275	35806	28341	69666	22596	67834	49829	85624	43500	44899	67282	70618	103071	19361	41524	29307	42442	29781	44709	31079	36583	22854	65866	73797	57162		31640	20618	18379	46646	13142	47265	19481	39418	34723	27689	40548	37251	60888	8329	19727	12124	19368	15552	21990	15186	15783	14289	32452
47	35509	31751	27372	69245	22254	67576	49186	83908	43911	49427	73915	70881	105184	19565	41577	29287	43023	29839	44717	32441	37522	23265	66682	73760	56995		32999	20614	18662	46660	13180	48242	19608	39002	34413	28022	39745	37053	60338	8114	19583	11643	25298	15819	21432	15064	15772	13455	31759
48	35220	31467	27758	69547	21830	67825	49478	82902	42701	44974	68192	70642	110177	19464	40907	28911	55515	29470	44671	35660	37952	22878	65072	73956	57553		31035	20008	18020	45982	13140	47252	19746	39295	34104	28287	40604	37048	60401	8674	19947	12586	19164	14697	20243	15398	15615	14572	31577
49	35173	35185	27710	68147	21912	67974	50065	84442	43876	43669	70155	70573	117216	18886	41486	29633	42585	29563	44506	32198	37828	23413	65935	73717	57254		33921	20313	18431	45497	12677	48390	19301	39514	35019	28201	39946	37327	59632	8193	20034	12157	19037	16456	21641	14654	15667	14615	31951
50	34853	31883	27427	69405	21793	67796	49732	83322	42850	49017	71495	70294	120512	19073	41311	28951	42722	29892	44139	33454	38600	22522	65187	74851	57525		33984	19733	18251	45308	12804	47029	19399	39645	35222	28605	39780	37764	58567	8939	22066	11297	19432	15705	20316	15522	15798	14492	31884
51	33930	31438	27775	69680	22117	68633	48323	83099	42559	49278	72144	70556	121457	19304	41215	29491	55732	29803	44122	34910	37986	22974	64680	74191	56252		32133	20073	17660	45179	12958	46644	19269	40008	31019	28260	39659	37598	57785	8190	21582	11338	16826	16432	21783	15008	15642	14351	31532
52	34518	35310	27020	69931	21289	68387	48828	83327	42966	49514	71830	70996	104265	19425	41217	29412	55804	30769	44440	35140	38380	24309	64426	73981	56720		31725	19899	17895	46103	13056	48117	18747	40295	34049	28570	39200	37542	56863	8267	19842	12560	19196	16135	20485	15307	15578	14390	31349
53	34439	36365	26817	71234	21798	67503	49897	82964	42182	49823	70662	71070	104125	19346	41038	29936	55584	29721	44591	36413	38519	24970	64934	73646	57362		31989	19682	18010	55150	13930	48476	18846	39969	30418	27832	39008	37602	54611	8266	20277	11475	19156	15422	21697	15296	15627	14726	31734
54	33789	36355	27203	71990	22783	67942	49198	82813	42474	49400	70079	71722	104879	19741	41359	29218	42544	30658	43868	36764	37211	23522	64471	74417	56471		32080	19942	18054	47391	13173	48154	18945	40400	34269	28326	38370	37278	62930	8473	20228	11427	18962	15574	21563	15380	15391	14519	31753
55	33485	35964	26877	70945	22441	69500	48976	83754	42526	43481	70868	72006	105680	19533	41249	29752	55764	29728	43865	36342	38072	25716	64489	74780	57174		32522	19649	17997	47541	12973	48268	19246	39760	31028	27960	38219	37057	63306	8424	20488	13007	19266	15765	19937	15544	16118	13460	31571
56	33488	36083	26657	71539	22121	67874	50017	83821	42395	49331	70008	70258	105995	19213	40916	29557	55958	29880	44418	36005	37285	25846	64412	74146	56300		35250	19879	17744	48260	12799	48242	19123	39902	30614	27952	38406	36967	54168	8311	20372	11246	19397	16353	21682	15482	16002	14543	32084
57	32977	36000	26799	72610	22335	68294	49980	83865	42802	49204	69475	70938	104828	19560	42026	29693	42268	30248	44088	34275	37166	25465	64761	73786	56358		33779	19457	17615	47965	13029	48454	19270	40305	35274	28099	38756	37027	55709	8634	20724	11339	18885	15716	21738	15406	16187	13599	31370
58	33222	36300	26260	72793	22554	67831	48862	83904	43319	49242	70131	71156	104879	20250	41745	29744	55391	30413	44229	34194	36746	25362	64080	73571	56465		33456	19925	17677	48207	12992	49088	18858	40030	30714	27934	39713	37215	57299	8430	20377	11068	18761	16134	21528	15475	16373	14098	31284
59	33288	35707	26286	72975	22000	68586	50123	83264	41969	43772	69958	71447	104081	20134	42086	29333	41616	30465	43776	34209	37193	25630	63972	73803	56264		33776	19724	17558	56457	12878	48849	19012	40216	34674	28565	40725	36776	57932	8302	20477	11721	19217	16295	21406	15293	15939	14331	31450
60	33081	35812	26643	73723	22144	67508	48511	83490	41802	49426	78644	71200	104191	20185	41954	29540	55566	30541	39707	34521	37490	25404	64475	73959	56510		33771	19622	17876	55599	12777	48073	19004	39857	29821	27957	41712	37145	57744	8414	19780	12032	18898	15920	20004	15323	16457	14176	31199
61	32622	36042	26868	72336	21784	69486	48865	83588	42675	49175	70044	70959	102968	20487	41984	29698	41748	30640	44082	34244	36167	24892	64774	73781	55706		33657	19605	17330	55269	12712	48967	18716	40831	34540	27724	42429	36892	54919	8156	20055	11341	18710	15897	21527	14386	16042	14757	31798
62	31946	37428	26435	73433	21722	69757	49168	83594	41819	49489	69908	71050	102824	19711	42028	29661	55262	30648	43948	34452	36142	23113	63723	73762	56512		33816	19645	17817	56860	12811	47853	18410	40306	34569	27363	43391	37517	53265	8295	21489	12659	19109	15969	21636	15389	17343	14506	31202
63	33381	37965	25761	72565	21814	69454	49711	84276	41381	49969	69724	71612	97132	19386	42089	30009	45850	30669	44600	36018	36049	23160	63717	73423	56229		34091	19465	17634	57137	13024	48375	18288	41018	34204	27903	43300	36783	60629	7967	19815	11586	18536	15981	21673	15584	16894	14250	30714
64	32879	38732	26417	72478	22035	68789	49029	83241	42730	49678	69303	71473	120095	20384	41912	30057	55661	30669	44643	36000	36617	23773	64563	73608	56468		36524	19200	17375	56150	12552	48116	19322	41495	33873	27807	43189	37499	59225	8080	19842	11440	18879	17086	21632	15747	16310	14696	31971
65	34334	38851	26235	73021	21963	69103	49086	83913	42200	44534	71226	71487	97640	19895	42406	29551	43669	29874	44302	36314	36128	23699	64377	73192	55973		37170	19440	17381	56960	13107	47629	18386	40464	30289	27831	43763	37113	60134	8254	21716	11128	18482	16634	21604	15258	16629	14798	31386
66	34906	38584	26380	72573	22272	68878	49278	83796	42810	49591	71903	72112	104250	20320	41922	29611	36903	30454	44441	35920	36126	23362	64045	73830	56348		38147	19622	17620	48200	12320	47866	18384	41416	30286	27710	43136	36745	59077	8345	19719	11815	18927	15857	21646	15178	16346	15223	31600
67	35575	39047	25876	72052	21244	68744	49413	83890	42636	49727	72026	72037	105867	20650	42066	29461	37499	30121	44739	35887	35933	24009	64631	73056	56389		37190	19559	17680	47507	12681	47263	18459	41247	30258	27615	43047	37152	61525	8458	19284	11099	18537	16173	19931	15466	16172	14765	30889
68	36799	39434	25797	69530	21516	68457	49484	83805	42244	49716	72213	71211	106222	20177	40879	29905	38342	30135	44865	34811	36515	23440	64260	74717	56156		37160	19129	17688	48446	12393	47231	18720	40913	33735	27753	43203	36556	62458	7932	19951	12322	18530	16215	21908	15369	16462	14867	31622
69	32359	38536	26349	68750	20518	69582	49871	83446	41828	50215	79408	71671	106146	19773	42330	30122	38518	30515	44400	36784	36661	23409	65117	74894	56430		36971	19408	17383	48717	12523	47711	18253	41081	34044	27782	42595	36968	60192	8392	19504	11467	18247	16284	22034	15502	16443	14837	31416
70	35988	38844	25921	67981	21547	70245	49002	82965	40557	44232	79935	71415	105207	19557	41712	29669	38483	30410	45220	35473	37103	23451	64770	73074	56767		37078	20039	17262	48380	12515	47020	18379	41211	33702	27550	42987	36984	58525	8331	19229	11137	18273	17176	21437	15547	16294	13727	31180
71	36781	39268	25394	66939	22147	71473	48905	82968	40642	50236	79602	72719	106642	20237	42250	30024	44793	29852	45124	35222	37290	24901	64781	73936	55917		36827	19423	17374	48701	12681	47089	18575	40925	34277	27626	42613	36917	58555	8269	19775	12002	18416	16444	21950	15512	16114	13975	31178
72	32540	39477	26039	66264	21612	71817	48456	82244	41092	50587	80105	71716	106552	20022	42005	29791	43831	29888	44622	35685	36895	23488	64035	74325	57310		37341	19434	17391	48319	12509	46667	18053	41171	33474	27675	41831	37134	58748	8125	19612	11332	18069	15860	21183	15527	16651	15412	31528
73	36209	38938	25442	66397	21437	70551	48783	85569	41711	51983	81139	72331	105497	19824	41669	29252	55128	29750	45514	35031	36538	24137	64758	73541	57075		38201	19532	17680	48871	12511	46516	18493	40918	34055	27858	42284	37075	59769	8005	19663	11293	18175	16008	21782	15681	16186	13979	31662
74	37952	38434	25695	65901	21659	66267	49341	84560	41989	51943	79766	71896	105786	20355	41438	29498	55810	30081	45193	34901	36876	24158	64961	72817	57379		37972	19351	17450	48151	12579	46235	18843	40723	33767	27957	41110	37067	60602	8066	18871	11057	18241	16240	21257	15528	16030	15271	31348
75	33816	38688	24841	66457	21297	67474	48738	84028	41244	46829	79880	71607	105441	20357	41770	29926	55231	30201	45633	34675	36570	23970	64334	74008	56484		37700	19004	17215	48447	12118	46566	18058	40977	33534	27576	40777	37192	62789	8107	19157	11325	18133	16160	21570	15810	16782	13623	31440
76	33851	38699	25564	67931	21333	67404	48844	81242	42276	51017	79535	72514	105974	19833	41672	29876	55896	29887	45649	35077	36929	23849	63968	73676	57048		38169	18830	17266	57138	12727	47147	17967	40929	29320	27705	40327	37106	62791	8167	19055	10997	18189	15671	21397	16089	16555	15010	31723
77	33391	38541	25931	66684	21007	67472	49167	83332	41572	52284	79086	72609	106149	19759	41533	29795	55654	30701	45818	34436	36391	24486	64376	73914	57519		38327	19178	17025	49081	13472	46574	18322	40321	33878	27953	40169	31953	60491	8237	21002	12237	18759	17074	21031	15877	16473	13421	31085
78	34336	37812	24822	66307	21417	66254	48469	81940	41661	45649	72473	72875	106131	20076	41259	29855	41865	29752	46493	34922	36246	24111	64425	74146	57757		38788	19043	17295	56652	12828	46750	18173	40953	29868	27257	39500	36571	59380	7928	18974	11099	17922	16882	20872	15461	16005	15085	31319
79	34058	37973	25137	65656	21391	67761	49707	83054	41932	45439	82347	71597	105321	20369	41231	29840	55983	30148	45958	34976	35944	25249	66047	73899	56243		38647	19020	17310	57224	12214	47108	17948	40525	29436	26804	39751	37220	57724	7964	19602	11235	18320	16475	21620	15895	16520	15247	30712
80	33539	38894	25454	65578	21840	66890	49137	84655	40659	44493	74536	72307	106016	19896	41973	29608	41418	30814	45794	34318	36074	24327	65420	73197	57049		38995	18935	16866	48676	12375	46096	17972	40621	29727	27438	39101	37050	57996	8229	19211	11241	18122	16598	20745	15282	16690	14826	30773
81	33345	38058	24794	66699	21325	66524	47844	83679	40957	45231	76941	72350	104970	19933	41132	29428	42339	30737	45911	33979	37200	23976	65409	74022	57080		36152	18666	16980	48652	12099	46843	17695	42171	33679	27470	38474	37383	60250	7950	19505	12015	18498	16700	21640	15689	16432	15066	31422
82	33457	37065	25129	66527	21423	66411	48822	83899	41500	51620	76948	72953	106308	20152	41534	28947	41676	29946	46590	34167	36706	24047	66030	72942	56940		36998	19435	16842	48472	12412	46302	18261	39982	33422	27681	38177	37069	53177	8136	20978	10996	17844	16920	20861	15415	16683	13663	31742
83	33182	36401	24966	67750	21049	70798	48415	82955	40541	44743	79561	72255	105907	20145	41196	29195	56670	29809	46284	35410	36481	24279	60474	74209	56262		36600	19015	17371	49054	12413	45948	18000	40108	29582	27047	38627	37166	56178	8332	20992	11279	17921	17086	21122	16040	16496	13617	31829
84	33938	36561	25160	78863	20064	67229	48007	83203	41222	51050	83903	72152	104792	20590	41553	29266	41510	30683	46851	34125	36643	24524	61154	73404	56499		36861	18902	17365	48820	12382	46538	18548	40165	32868	27413	37914	37380	56300	7983	19294	11216	17828	17038	21397	15810	16436	15211	31725
85	33919	35790	24888	78513	20509	67136	48845	83005	40591	51671	84512	72915	105760	20440	41836	29094	40922	30842	46437	34778	36896	24328	60417	73054	57567		37121	19308	16921	49121	12352	47159	18293	40224	29322	27527	37762	37280	57557	7903	19407	10675	18220	16816	21482	15605	16400	14932	31086
86	34361	37285	25239	70482	21333	66150	49261	83746	41426	51478	83499	72544	105804	20382	42216	29121	55010	30980	47137	33872	37142	24006	60177	74362	57066		37529	18487	17146	48749	12343	46341	17860	40229	33374	26931	37987	36997	57971	7848	18941	12258	18441	16816	21601	15966	16716	14071	30890
87	33678	37548	25139	71068	20771	65895	49000	83740	40832	50523	83380	73535	106707	19570	40784	29690	41353	30859	46881	34847	37139	24274	64753	73754	57191		37024	18659	16822	48873	12377	46663	17956	39970	32276	27586	37550	36635	58854	7923	18875	12073	18031	17326	20893	16052	16944	13287	31346
88	35033	38076	25142	71615	20312	65519	48820	83549	41541	51397	82563	73763	106204	18268	41708	30082	56057	30883	46753	34160	36376	24255	64736	73184	56409		37363	19097	17000	48765	12222	46951	18087	40027	32834	27471	37562	36226	58898	7679	20501	11128	18556	17244	21033	16079	16530	13512	30929
89	35653	33705	25101	71323	20761	66874	48544	82385	41121	51246	82630	72954	106064	20680	41847	29881	41218	30786	47069	34519	36159	24389	64518	73155	56867		37714	18743	17076	48464	12720	46867	17750	36452	33029	27709	40002	37231	58916	7898	20537	12007	18632	16862	21421	16075	16458	14547	31181
90	35251	35407	25089	71424	21298	66077	48233	84147	41220	43217	82612	73173	106417	20419	41324	28921	55703	31420	46185	34086	36477	24381	65078	73271	57289		37262	18789	16635	56422	12656	47156	17335	37196	32493	27078	36572	37041	58904	7737	18850	12200	19248	17271	21546	16455	16916	14329	31291
91	35715	36108	25146	70454	20529	66439	48691	82721	39764	43969	81927	72929	105438	20756	41940	29333	40504	31110	46503	34968	36121	25153	64623	73134	56623		38084	18829	16869	48941	12472	47604	17739	37216	32308	27645	36810	36463	59418	8329	19148	11838	18627	17482	21801	16246	16209	13706	31122
92	35276	36856	25165	71776	21205	66430	48306	82782	40486	51096	83780	73164	100397	20217	41672	29338	56284	30616	45971	34755	36168	24538	64831	72976	57041		37264	18853	16653	48397	12326	47629	17773	37390	32853	27379	36899	37740	59219	7824	18892	11081	18489	17672	21077	15926	16604	14721	31159
93	35600	31360	24876	72105	20466	64936	48132	83236	40688	52070	84684	72965	100730	18056	42136	29768	40739	31489	46470	34535	36641	25051	64491	72511	56769		36941	18747	16216	49274	12020	46539	17550	36652	32763	27177	37459	37174	60105	7641	20554	11959	18758	17568	21503	15953	16448	14340	31074
94	33144	31397	24768	72278	21380	65431	48540	82128	39747	42540	85046	73017	104523	20150	41729	30111	40615	31001	45859	34708	36783	25374	64166	73752	56779		37784	18786	16468	48433	12211	46908	17249	36108	33062	27042	40167	37317	59200	8221	20333	10892	17941	17917	21225	16581	17043	14728	31282
95	33458	33030	24902	71822	21484	65262	48393	81682	40371	43068	85191	73413	105582	18624	41452	29490	40466	31315	45149	34176	36936	25037	64575	72935	57102		37810	18624	16909	48660	12556	46820	17556	36666	32145	27388	37936	37588	59979	7997	20397	11269	18238	17338	21363	16238	15977	13359	31881
96	34632	32662	25393	71550	20668	65647	47980	81474	40643	42669	83357	73629	106186	20661	42229	29201	55218	30907	45670	34202	36701	25040	63826	72950	56761		38091	19000	16651	49828	12390	46732	17507	37119	31749	27266	40611	37441	59369	7837	18874	10960	18166	17814	21573	16377	16612	14214	31299
97	34749	33415	24712	71516	21152	65040	48536	82886	40056	42995	84361	73115	105440	20176	42173	30042	55709	31268	45378	33988	36813	25772	64156	73564	56166		37831	18992	16674	49237	12545	46975	17730	37377	32091	27576	40594	37418	59345	7938	19198	12563	17990	18096	21591	16412	16672	13795	32091
98	34851	33677	25021	70638	21182	71364	48523	82749	40056	43751	83996	73382	106322	20450	41914	29598	41113	31403	44915	34362	37610	25342	64050	73682	57383		37643	18454	17005	49271	12345	46501	18116	37192	31935	27453	40973	37667	58794	7891	19070	11157	17441	17869	21661	15239	16606	13482	31906
99	35397	33067	24701	71098	20808	71264	48428	82460	40027	43923	84574	73505	106186	20173	41772	29511	40853	31065	46334	33319	37618	25486	64920	73433	56644		37281	18676	16869	48900	11887	46846	17342	37059	31528	27302	40201	36685	59149	7896	18924	10930	17771	17976	21301	16962	16303	14401	32016
100	35630	33527	24421	70797	21554	72027	48375	81551	39814	43516	83189	73376	106569	20287	42475	30049	40792	31476	45089	34206	37689	25582	64143	73069	56122		37578	18316	16331	48167	12169	46991	17430	37439	31884	27082	40105	37740	59255	7804	18842	12413	17757	17773	21728	16828	17326	14124	31684
101	35013	33882	25031	68940	20902	72300	52993	81906	40052	52523	82545	72341	106167	20089	42166	29529	55253	31347	45198	33848	37103	25457	64541	73322	56780		37510	18984	16596	48686	12977	46308	17428	37812	32361	26980	39722	37022	59529	7708	18653	11317	17494	18044	20825	16803	17384	13986	31784
102	35453	34336	24487	77365	20987	72587	47974	82730	40315	52271	82257	74316	107032	20162	41918	30340	40612	31689	46020	34143	38120	25401	64025	73463	56380		37571	18763	16051	47985	12913	46233	17711	37915	28043	26849	40662	37550	59849	7719	19190	10900	17337	17998	21637	16800	17924	14141	31618
103	35746	35211	25111	68218	20994	53248	53951	80957	40152	52321	83352	73526	105577	18831	42278	29940	39261	31990	45757	33848	37650	25552	64455	73380	56315		37656	18958	16286	47960	12148	46350	17711	38626	31840	27303	40481	37417	59291	7987	20900	11192	17045	18099	21607	16911	18407	12825	31506
104	35358	36175	24559	77398	20302	53350	52846	81822	41054	51728	82930	73623	107363	20084	42256	29239	40777	31587	45579	34775	37031	25438	64248	72926	57050		37774	18817	16455	48795	12569	45680	17624	39166	32017	27588	41079	36736	58635	7984	19053	11341	16859	18152	21163	16931	17713	12977	31146
105	33733	37583	24721	69542	21030	51767	52759	81279	40399	51707	83472	73483	106735	20597	41979	29154	40855	31269	45933	34152	37716	25404	64224	72980	56764		38253	18630	16728	48890	12695	46137	17308	38650	27499	27651	42311	36751	59378	7865	19769	11655	16841	17804	21360	16840	17658	13364	31547
106	34211	37451	25091	70261	20953	52741	52158	80211	40104	45187	83336	74368	106875	20390	41943	29029	40318	31469	45136	34538	38148	25266	64598	73266	56447		37607	18452	16505	48985	12339	45901	16765	39153	31326	27765	41770	37345	59290	7779	19530	11105	16765	18243	21737	16990	18479	14218	31227
107	34561	30331	24367	70989	20980	52273	53154	79816	38878	51873	80531	73897	106736	20403	42103	29632	40317	31360	46187	34636	38097	25925	64588	72993	56990		37744	18787	16266	49693	11774	46235	17042	38550	31907	26807	41324	37096	59738	7648	19443	11316	16796	18654	21190	16495	18068	13841	31304
108	34712	30825	24045	70532	20908	52270	52960	80786	39610	51924	80726	73759	106037	20298	42012	29086	55515	31758	46009	33767	38359	25545	63252	73138	56744		37522	18348	16779	49395	12276	45770	17193	39153	31304	27378	40937	36828	59004	7834	20422	11139	16671	18059	21656	16956	17248	13615	31232
109	33944	30776	24512	69758	20237	73417	52103	81152	39389	44776	80708	74011	106300	19794	42450	29130	55097	31911	46575	35035	39949	25311	64283	73261	56469		37222	18318	16501	49658	12789	45886	17452	39141	31314	25381	41302	36977	59023	7879	18976	12161	16950	18508	21000	17091	18472	13914	31046
110	34101	31514	24105	68278	19952	71530	48596	80302	39933	45361	81324	74366	106936	20365	42115	29918	40752	31762	46721	35475	39320	25437	63911	72994	56805		37211	18666	16456	50254	12236	45658	16825	39595	31372	25597	42045	36950	59409	7936	19342	12117	17079	18267	21386	17380	18096	14103	31918
111	30526	34303	24527	67294	21201	70992	47491	80644	39755	45780	80200	73727	105728	20430	42528	28782	40502	31899	46110	36111	39971	25705	63480	72706	56474		37575	18486	16684	50217	12370	44922	17146	36047	30973	27793	41666	36657	58626	7765	20720	11990	16640	18528	21236	17388	17976	13027	31399
112	29655	35076	24781	67226	20585	70409	48603	81394	38926	51865	81248	75177	99155	20570	43083	30233	40411	31391	45868	37080	39650	25596	63487	73036	56088		37484	18584	16258	49927	12509	45016	17151	36587	31193	27820	41968	36689	59602	7842	20895	12419	16572	18207	20898	17516	17909	13749	32168
113	31965	35291	24676	68204	21098	69123	48263	80832	38766	52278	80776	75215	98500	18731	42231	29464	40532	31227	45782	37031	38970	25514	63803	72426	57434		37802	18601	15896	50068	12121	45852	17170	36527	30926	27562	41824	36953	58775	8030	19016	11092	16194	18565	21377	17750	17527	12913	32417
114	31959	34806	24484	67995	21232	68980	48324	81349	39935	45370	80022	74724	98492	18046	42219	30202	54908	31807	45056	37152	38772	25563	63390	74010	57078		37832	18431	15878	49302	12312	44934	17078	36860	31110	28237	41226	36573	57798	7789	19328	12264	16182	18734	20835	17787	17655	13607	33332
115	30850	35167	24497	68041	21310	68048	48563	81232	39721	51069	79217	75454	97047	20412	42223	30456	54872	31332	44558	36983	37903	26017	63131	73301	57073		38039	18152	15990	49952	12787	45534	17079	37272	30408	27899	41433	37122	58110	7650	19147	10906	15800	18691	21385	17966	17629	13648	33031
116	30893	35452	25461	69841	20786	68569	48523	81203	39702	51594	79449	75014	96106	18583	42811	30710	40496	31630	44372	37000	38778	25949	64493	73572	57813		37256	18593	16524	49892	12103	44538	17250	38003	30718	27692	40865	36692	57833	7729	20475	11043	16122	18575	21014	18313	17430	13804	32609
117	32434	35015	24556	70528	20334	68889	52587	80914	39263	51960	79741	75339	94304	19092	42663	29993	55206	32177	44769	36695	38526	25395	65098	72836	56858		37798	18021	16077	49638	12879	45169	17516	37671	30592	27766	40620	37651	57980	7705	18997	12024	16007	18486	21330	18438	17460	13641	33094
118	33138	34333	24929	70564	20424	68395	47184	81482	39762	51577	79603	75968	114941	20601	42559	29323	39901	31759	44737	36111	38217	25363	64242	73692	57478		37839	18376	15685	49371	12421	45650	16872	37685	30475	28039	39877	37107	57599	7617	18957	11106	15899	18540	21440	17878	17140	13066	32154
119	33764	34584	25174	71061	20790	67530	48564	81314	39753	51347	80616	75504	115024	20323	42810	29717	55863	31952	45611	35900	38774	25317	63225	72631	56987		37280	18801	15909	49045	12240	45816	17207	37789	31003	27965	39846	37442	57459	7986	19176	12087	16130	18327	20932	18620	17171	12275	32157
120	33380	34034	24203	71190	21300	69320	47298	81561	40675	51475	80888	74551	115370	18595	42317	29947	46063	31516	44789	34753	37919	25825	64000	72319	57982		37619	18367	16041	49702	12086	44928	17101	38205	31119	28228	39950	36956	57259	7394	18884	10952	16180	18258	21312	18077	16726	12392	32384
121	34550	33425	24388	70690	20835	69108	47601	81367	39766	51539	81937	74931	116591	20408	42224	29860	55034	31486	44756	34430	37275	25605	63315	73562	57991		38363	18549	16151	49175	12073	44877	17240	37806	30703	25411	40325	37242	57912	7500	19269	11863	15714	18871	21355	18511	16671	13245	32367
122	34937	30028	24497	71436	21349	68555	47438	81108	39274	51575	81973	75396	119273	20338	42834	29886	55245	32310	44760	34648	38066	25856	64498	73316	58851		37909	18292	16011	49953	12327	44953	16652	37724	30980	27864	40215	32820	57455	7938	19907	11273	15717	18790	21296	18193	16758	13340	32084
123	34878	30502	23881	70831	21694	68930	47694	82289	38984	51638	81946	75214	104917	20955	42428	29517	55729	32207	44438	34964	37039	25282	63739	72986	58501		37845	18092	15596	49325	12028	44701	17196	38320	30518	28164	39798	37690	56958	7749	19952	10977	15484	18657	21560	18614	16914	13505	32135
124	35667	29819	24199	70373	20965	68820	47595	81732	39556	51437	81774	75017	105515	20644	42467	29869	55431	32120	45023	34752	37161	25750	63893	72687	58513		37349	18801	15956	50179	11947	44148	16422	38024	30697	25536	39553	37251	57370	7582	20046	11984	19265	18615	21835	18376	17019	13411	31870
125	35740	37671	23822	70617	21164	68579	48008	81059	39798	51151	81700	75307	104648	20753	42723	29883	40206	32330	45382	34237	36611	26143	62881	72983	58714		37125	18351	15892	49934	12011	44596	16686	37972	30438	28447	39934	36920	57308	7762	20373	11016	22139	18422	21274	17870	17071	13389	32180
126	35431	29710	24230	70725	20628	67718	47962	81352	39796	45334	81061	74657	120024	21074	42228	29579	54950	31821	44791	34169	36874	25927	64962	72674	59024		37899	17972	16227	49303	11877	44743	17089	37949	30422	25939	38965	36866	57286	8172	20618	11111	22145	18341	21753	18090	17100	12965	31528
127	34638	36954	24512	70066	20512	67726	48152	81003	39339	50715	81526	75542	116024	19631	41893	30040	40205	32131	45046	35054	36762	25863	63259	72089	57938		37628	17725	15359	49792	11965	44832	17191	37965	30739	25961	39437	32302	57237	7681	20172	11118	21773	18725	21907	18284	16699	12592	31455
128	35954	37753	23542	70065	20874	67882	48588	81176	40112	50744	81186	74374	113260	19231	42126	30165	40001	31405	45730	34907	36895	25762	63757	72098	57602		37426	18385	15837	49903	12289	44751	16899	38544	30719	28764	39411	37091	57186	7821	21542	10890	21852	18613	21375	17146	17109	13386	31430
129	34980	37526	24299	71085	21350	68555	48254	80966	40498	51440	81146	74930	113399	20872	42876	29730	55830	32545	45874	35336	36108	25577	63877	72876	58690		37583	17878	15803	49561	12017	44654	16622	37350	29930	25849	39550	37179	56472	7692	20042	12017	21877	18696	22614	18982	16932	12167	31981
130	34742	37085	23707	70059	21187	67968	47531	79060	39816	51501	81084	74888	113018	20799	41990	29841	55862	31885	45357	34462	36238	25901	63579	72491	58223		37951	18287	15899	48985	12384	44709	16597	38588	30278	25924	39502	33080	56510	7668	20078	10861	21361	18180	21970	18446	16754	12169	31608
131	35022	36094	24208	69836	21798	69203	48645	78897	40197	51409	80408	74660	113460	21316	42255	29551	40080	32065	44557	34333	36305	25751	62620	72131	58057		37696	17349	15946	49033	11856	44474	16575	38692	30232	26055	40573	36816	56314	7705	19683	11278	21405	17822	22404	18530	16900	12709	31561
132	34347	36248	23560	68874	22260	68995	48048	80543	40012	51133	80874	74543	117462	20207	42653	29711	39409	31815	45273	34586	35060	26373	62759	72365	57731		37310	18144	15766	49813	12163	44648	16146	38304	30216	25685	40163	37162	56148	7290	19706	10713	21424	18364	22612	18591	16777	12169	31525
133	34371	35898	23732	68746	21855	67876	47432	79878	39800	42494	80453	73374	117507	20475	41565	29448	40021	32142	45310	34779	35540	26055	62944	72261	58588		37729	17783	15843	50388	12100	44105	16398	38779	30025	26097	40605	31916	56288	7874	19705	10931	18245	18386	22937	18221	17251	11786	30854
134	34376	36372	23719	68710	21642	68201	47772	81129	39079	43247	80505	74034	116932	20483	42524	30110	55829	32179	45345	34715	35126	25929	62706	71606	57891		37531	17671	15970	49016	12125	44818	16564	38785	30113	26517	40508	37445	55916	7742	19829	11228	21847	18966	23084	17967	16664	12128	31276
135	34994	33391	24201	66792	22481	68285	48399	82059	39907	43094	80302	73171	115761	20393	42662	29763	39702	32135	44468	34685	35149	26559	62712	71998	58027		37384	17681	16177	50072	11975	44147	16627	38392	29476	26167	41146	37501	56778	7801	19291	12027	21094	18522	22745	18248	17315	12175	30913
136	35162	36480	23553	66887	21649	68005	47879	80955	39470	43269	81568	73862	117547	18827	42467	29640	40023	32148	46001	35772	34865	25278	62995	72241	58422		37089	17586	15801	48884	12135	44155	16779	38663	29719	26293	39616	37486	56549	7801	19342	11053	18605	18438	22380	18490	17118	13021	31623
137	36426	36590	24026	66921	21764	67846	47956	80852	39658	44115	81194	73618	99513	20176	42787	29972	39833	31867	45671	36405	34255	25537	62329	72890	58293		37970	17624	15809	49416	11654	43622	16281	37836	29733	26625	39834	37401	56769	7243	19507	11916	18141	18353	22985	18808	16906	12824	31149
138	35156	37450	24304	65854	20916	69102	47012	81117	39324	43747	82175	75779	102058	20704	41501	29324	40161	32140	45636	37095	34547	25858	62708	72580	58196		37340	17607	16046	48622	12156	44570	16442	38089	29433	26315	40166	37896	56256	7780	19177	11039	18579	18788	22538	16805	17118	12014	30816
139	35608	36992	24195	66254	21293	67974	47943	80995	39022	43086	80952	75508	102621	20432	42262	29866	40151	31735	45993	36426	34071	25855	63481	72322	58165		37455	17875	15701	47413	12169	44944	17068	38068	29592	26400	38660	37843	56857	7574	19089	10710	21465	17989	22766	18076	16386	12170	31008
140	34664	37359	24086	66153	21379	67651	47982	83199	39564	43311	81876	76297	101379	18996	42878	30432	39273	32108	46148	35392	34547	25459	63590	72983	57822		37784	17599	15843	46960	11958	44378	16771	38765	29530	26669	38720	37025	56884	7758	20950	10819	21562	18126	22491	16877	16458	12448	30914
141	34395	37508	24227	65792	21436	68150	47340	83475	39759	43606	81271	75807	101698	18548	42210	30087	55292	32115	45197	34025	34492	25158	63736	73088	57851		37150	17215	15575	46927	11841	44370	16621	38161	29495	27009	38604	36848	56952	7375	20684	11969	19122	18589	22566	16823	16625	11935	31239
142	34044	29514	23814	65902	21601	68184	47697	80564	39326	43410	80462	76761	101392	18649	42559	30161	45868	32248	45425	33774	34889	25506	63332	73063	58287		36921	17744	15239	47221	11912	44118	16511	39049	29226	26365	39674	37599	57259	7609	20349	10626	21368	18444	22330	17098	16558	11818	31301
143	33921	37237	23289	67718	21525	67639	47411	81243	39271	43534	80793	77232	102320	20346	43009	29548	47273	31673	45381	34108	34358	25518	63779	72848	58372		37501	17391	15576	48111	11791	44202	15994	38715	29434	26759	37678	36965	56807	7582	20927	12176	21700	18689	22599	17091	16258	11972	30980
144	34482	37533	23405	68155	21320	67592	47537	80739	39854	43355	80682	77850	103275	20120	42956	30169	54977	32315	45931	33926	34326	25342	63206	72478	58829		36932	17105	16053	48435	11728	44356	16692	38466	28986	26437	39344	36719	56763	7455	20840	11430	21040	18284	22843	17136	16537	11974	30998
145	33948	29448	23967	67732	21161	67078	46886	81422	39299	43861	80610	77685	103413	20506	43130	30374	46782	32275	45966	34452	34575	25355	62905	72887	58068		37157	17418	15778	49323	12092	44286	16455	38184	28909	26546	42437	36443	56438	7463	20564	10843	21732	18559	22488	17198	16345	11732	31586
146	33999	29856	23498	69000	21475	67714	47166	80850	39084	44199	81822	77403	104045	18178	43321	29606	55478	32177	46716	33738	34489	24800	63063	73303	58440		37009	17469	15651	48656	11855	43532	16104	38540	29066	27226	34924	36921	56120	7525	20530	10951	21600	18311	23004	18847	15970	11656	31575
147	34664	29340	23843	68775	21035	67142	47242	80285	39142	43744	82914	78921	101926	20225	43814	30036	46686	31893	47248	33994	34037	25425	63258	72533	59839		36896	16857	15808	49172	11610	43515	16531	38773	29592	26352	41632	36924	56597	7643	20847	11021	21622	18483	22153	17797	16484	11764	31959
148	33626	29538	24255	68064	21021	66877	47490	80423	38950	43876	83514	80645	102335	18877	43160	29703	55842	31837	46663	34320	34692	25173	63597	72975	59146		36890	16779	15667	48635	12024	44202	16596	38944	29265	26520	42063	37119	55941	7806	20649	11310	20761	18681	22226	17924	16465	11785	31594
149	33845	29972	23154	68827	21145	67101	47264	79662	38805	44368	82837	81386	103462	18430	42807	29594	47212	31011	46640	35209	34260	25878	62444	71582	59277		37109	16673	15532	49042	11697	44382	15886	38712	28600	26529	41440	36814	55796	7637	21232	10984	22848	18905	22393	17187	16103	11883	31478
150	34074	29419	23712	66691	21041	66881	47023	80595	38410	44633	82291	81333	102311	18576	44219	29547	46124	32055	46243	34968	34522	25533	62290	73088	58899		37304	17127	15207	48997	11752	43211	16592	38369	29126	26635	41587	37005	55445	7635	20674	12277	18260	18977	22233	18731	16622	12051	31403
151	34325	29283	23657	67843	21237	66975	47563	80691	39025	44500	82668	81326	103223	18340	44096	29948	46277	32014	46493	36287	36805	25845	62680	72476	58481		36569	16852	15399	48762	12101	43044	16045	39065	28689	25936	42240	32510	56329	6808	20623	11033	18537	18943	22137	17901	16728	11306	31035
152	34629	29387	23846	67175	20441	67126	46843	80894	38484	44565	83506	81405	101809	18998	43137	29862	56205	31770	45564	37490	39725	25258	61739	72511	59002		36877	17045	15431	48441	11607	42831	16660	38602	28753	26127	41728	36884	55271	7324	19333	10930	16414	18881	21667	18111	16470	11987	31174
153	34099	32479	23436	67013	21476	66036	47853	81132	39056	43672	84383	81236	101949	18928	43747	29554	46161	31655	45323	36594	37142	25247	62156	72699	59185		36717	16870	15451	48785	11477	43133	16294	38599	28764	25630	42042	32462	55237	7735	19238	11034	16844	19343	22173	18647	16519	12078	31249
154	34769	33020	23575	66365	20732	66926	48715	80290	38148	43982	86863	80422	102067	19207	44401	29792	56220	32369	45469	36274	37139	25731	62344	72405	59512		36800	16663	15547	48338	11662	43026	16331	38730	28570	26277	41263	37450	54374	7271	18413	11141	17162	19234	21789	18226	16372	12151	31643
155	31998	33713	23214	67522	21426	66458	46722	80393	38313	43733	89429	80555	101909	20146	44588	29513	46536	31652	44628	35099	36612	25451	62815	73186	58401		36622	16625	15605	48317	11768	41686	15886	38437	28740	26172	41201	36875	54867	7985	21067	11987	17286	18833	22104	18664	16524	11345	30848
156	32737	34092	23910	67112	21088	66619	47232	80554	37858	44381	95974	80556	103781	19046	44553	29998	46298	31713	44599	33661	36774	25140	62591	73048	58899		36323	16794	15510	48353	11899	42359	15489	38468	28588	26025	41057	37005	54499	7537	21243	12050	17803	18909	22067	17950	16224	11519	30992
157	33168	34257	23694	67641	20572	66311	47226	81108	38420	44510	98260	79490	103563	18858	44183	29059	46735	31895	45587	37698	37197	24500	62456	71999	58067		36567	16380	15372	48658	11803	42447	15930	37872	28445	26428	40417	32981	54026	7459	21356	10971	17408	18674	21092	18384	16240	11527	31347
158	33278	34639	23230	68459	20416	67663	47931	79918	37784	43840	100217	80826	102785	18392	44473	29571	55524	32146	44836	36884	37237	25439	63438	72743	58902		36690	16852	15196	48886	11746	42362	16683	38177	28331	25740	40697	32653	55009	7444	21584	11101	16981	18697	21763	18489	16396	11066	30646
159	34327	35204	23812	68265	21271	66986	51105	80879	38149	44160	90456	80351	102602	18599	44014	29170	55816	32349	45612	36140	36399	25041	61627	72508	58965		36693	16797	15341	48269	12021	42284	15756	38440	28496	26960	40995	37071	55036	7276	21376	12375	15625	19263	21651	18214	16270	11605	30617
160	31785	30640	23467	68290	21405	66095	47674	81128	38138	43835	104354	79876	103287	18343	45202	30039	47050	32403	45234	35627	37097	25128	63258	72346	57564		36222	17113	15273	47747	11891	41701	16195	38398	28623	25934	41014	37237	54289	6835	21263	11164	17071	18817	21931	18461	15761	11557	30992
161	31592	31259	22833	67309	20924	66267	51867	80219	37843	44285	99422	79229	102811	20335	45226	29865	56482	32467	45624	35737	36345	25471	62967	72548	58080		36453	17046	15271	48317	11815	42397	16097	37794	28036	25664	40196	36543	53142	7670	21080	11183	17206	18717	21715	18259	16414	11620	30368
162	32300	31414	23399	67989	20834	45136	52236	80453	38055	44509	99595	78935	102049	18655	44223	29122	46908	32620	45766	36151	36007	24769	63302	72223	58146		36232	16786	14852	48278	11671	41840	16221	39069	28085	26203	41070	36458	59905	7329	21531	11079	16573	18624	21831	18204	16170	11139	30807
163	31789	31201	23349	67670	20559	45616	51957	80426	38225	44915	96987	79618	103259	20364	45022	29428	56534	33056	45977	36284	36172	25442	62166	71354	57875		35876	16376	15998	48482	12096	42550	16007	39232	28479	26041	40622	32947	56610	7602	21961	10996	22920	18978	21835	18344	17229	11493	30485
164	32375	32716	22937	66919	20814	45706	51408	80966	38337	44110	98816	79371	103205	19819	44397	29207	47007	32543	45416	36762	35469	25400	63477	71752	57958		36626	16533	15052	47899	11517	42109	16327	38134	27689	26306	41284	32020	53886	7470	21843	10904	16499	18927	21336	18382	16883	11020	30818
165	31179	31591	22939	67696	20594	45573	52000	80725	38311	44007	98100	79097	102896	18917	44691	29418	56140	32842	45273	36703	36124	25131	62722	70421	58482		36284	16394	15111	48016	11705	42246	15864	38197	28751	25911	40135	32671	51600	7498	22285	12037	16494	19218	21454	18153	16605	10920	30597
166	32001	31828	23418	66662	21192	66266	51590	80328	37452	44268	105904	79268	98441	18997	43672	29198	42590	33459	46841	35739	35814	25835	63063	69074	58018		36305	16790	14606	48978	11798	41357	16105	38892	28209	25967	40417	36646	49566	7093	22764	11316	16777	19255	21256	17873	17020	10844	30623
167	31832	31602	23442	66726	20895	68202	47251	80174	38233	43832	93857	79723	98396	18715	43994	29697	41450	32380	45656	36300	35654	25083	63354	69137	57785		36518	16506	16190	47922	11152	42100	16491	38242	27623	26044	39628	37172	50089	6904	22745	11277	16455	18879	21923	18098	16810	11828	30870
168	32141	31704	23105	67951	20048	66842	47090	80756	37841	43781	96111	77828	101568	18577	43704	29568	43042	33166	45872	36620	35846	24856	62191	69597	57471		38401	16588	15151	48125	11644	42199	16509	37855	28095	26106	39594	36857	51837	7297	22550	11685	16904	19213	21606	18367	16586	11045	31251
169	32803	31800	23198	67714	20605	67061	47742	80486	38024	44084	101663	79080	101847	19884	44213	29927	42965	32595	45564	36003	35821	25497	62268	69540	58422		38779	16220	14562	48179	11368	41110	16233	38339	28141	25815	38243	36380	54848	7317	22122	11844	22777	18847	21791	18227	16976	11047	31002
170	31543	30936	23589	67138	20455	66525	47836	80556	38079	45369	111715	78535	98580	20100	44169	29700	41075	32875	45337	35464	36032	25251	62319	69063	57991		40288	16708	15212	47876	11697	41503	16176	38259	27900	25789	37571	32677	59321	7363	21826	11777	16336	18742	22050	18231	16969	11073	30981
171	31949	34691	23573	66947	20560	66537	48131	80032	37692	45601	117213	79017	98103	18352	43517	29690	39986	33457	45524	35718	38895	24700	63237	68893	58787		40462	16378	14769	47171	11292	40836	16358	37570	27832	25579	36950	36694	52159	7293	22022	11879	16504	18869	21996	17912	16441	11122	30517
172	33254	34322	22876	67362	20942	65950	49480	80788	37794	46098	108149	78939	98247	20085	43286	29726	38951	33285	45950	35813	35729	25498	62719	69280	57450		39412	16599	16108	47327	11528	40723	15831	38781	28178	25926	37199	36746	52252	7295	20843	11570	16086	18491	21534	18139	16460	11502	30492
173	33055	33652	22639	67691	20662	65426	49425	80457	37533	46279	109665	79016	98438	18385	44007	30176	39368	33493	45032	34971	35509	24863	63440	67942	58795		38650	16339	15369	47994	11848	40768	16319	38051	27696	26058	37128	36505	52961	7360	20653	12290	16462	18196	21506	18337	16611	11527	30566
174	32433	34774	23032	67615	20443	65454	49515	80926	37425	46180	108670	78756	97197	18556	43539	29419	55472	32478	45797	35068	35370	25236	62787	68281	58464		38612	16348	15040	47877	11982	40655	15677	38097	27517	26130	38331	32699	53919	7312	20502	11635	16552	18348	21134	17961	16305	10384	30163
175	34919	33687	22736	67514	20917	66229	49167	80278	37572	47211	110353	78043	97245	18249	44059	29733	56142	33657	44952	35425	38008	24810	62702	67652	58439		38425	16359	14866	48347	12004	41080	15810	37852	27430	26209	38917	36505	53038	7470	20690	11011	16149	18148	21795	18606	16548	11075	31436
176	34510	33865	22620	67606	20287	65393	49028	79596	37666	47255	110880	78748	97701	18587	44053	29643	55723	32618	45241	35523	34881	24404	62188	67173	58357		39128	15914	14810	47544	11559	40536	15855	37823	27381	25908	38094	36628	53697	7262	20579	11358	23164	18622	21152	17828	16363	11534	30473
177	34611	33193	22740	68289	20324	65372	48488	78739	37586	48183	110669	78820	97304	19868	43902	28924	46250	32321	45355	35201	34864	24870	62756	67388	58984		39678	16289	14773	47004	11489	40737	16115	37333	27804	25986	37960	36281	53291	7394	20534	11896	19835	18495	20939	18024	16397	11055	30748
178	34494	32660	22589	68349	21170	64597	48207	80579	37502	46521	111171	78860	97952	18739	43560	28407	46540	32899	44780	35093	34911	25081	62155	66765	58616		39154	16341	14704	47032	12368	40373	15683	37955	27618	25738	37546	36365	53765	6948	22385	11500	19517	18328	21090	17280	16160	10736	30754
179	34531	32401	22723	67251	21057	64510	47256	78422	37456	44423	110309	78987	97129	18606	43769	26794	56269	32579	45367	35704	35136	25448	62425	67548	59487		39606	16456	15161	47060	12522	40230	15955	37940	27769	26051	38028	36122	52935	7506	20770	12179	19332	17993	21310	17859	15934	10601	30937
180	34560	33097	22639	67067	20728	63785	46831	77419	37379	44666	108270	78181	97266	18618	43771	27104	39798	33343	45719	35446	35036	24920	63255	67595	58923		38770	16336	15372	47500	11485	40888	15934	37539	27500	25907	37558	36288	52674	7444	20626	11313	19950	18561	21501	18520	16033	10622	30955
181	34509	32716	22402	66484	20338	65186	47252	78395	37281	44121	108530	77828	97682	18164	43414	26789	40020	33275	45567	34856	35011	24459	63030	66439	59306		36485	15666	14998	46814	11327	39728	15953	38181	27340	26229	37225	31934	51023	7395	20157	11363	22631	18406	21233	18259	16516	10826	31170
182	34478	32603	22071	66266	21000	64195	47354	79701	37873	44442	108021	78434	97591	20046	43870	30220	40491	32534	44682	35457	39060	25302	64008	73951	59335		36338	15996	14916	47018	11443	39089	15436	37629	27435	26198	37195	36415	58030	6701	21652	11398	16163	17830	21358	16825	16970	10772	30917
183	35123	32202	23072	66354	20931	63298	47064	79929	36850	45003	109094	77847	96938	20244	44703	29594	39733	32826	46224	35196	38993	25201	63268	73475	60043		36484	15821	14838	46715	12385	39408	15911	37549	27900	26256	36679	32100	55117	7105	19999	12655	16431	17964	21247	18254	17165	10530	30763
184	34513	31224	22608	65087	20582	64741	46732	79985	37574	44422	107827	77638	98010	19964	43595	29473	40754	33049	44778	36200	38478	24728	62682	73208	59234		36609	15698	14898	46405	12350	40018	15795	38096	26968	26249	36789	36353	52573	7277	21887	11359	16016	17862	21415	18143	17363	10728	30871
185	34326	35724	22784	66152	20643	64298	47548	80754	37374	45132	107828	78177	97702	18316	43564	29876	40297	33851	45191	35290	38820	24714	62726	74100	59926		36473	16177	14883	46691	11872	39882	15675	37785	26951	26670	35952	36826	51919	6622	20075	11341	15893	17856	21072	18071	17046	11107	31255
186	34591	36303	22918	65630	19854	63408	46129	80512	37450	45356	108944	77977	96615	18329	43871	29751	40497	32518	45046	35256	39345	24945	62404	73367	61011		36530	16162	14881	46350	12163	39639	15885	37894	27431	25920	36021	31990	50851	7192	20270	11351	15988	17712	21425	17897	14948	10534	31083
187	34274	35307	22693	65980	20553	63681	47465	80418	37771	45233	108754	77944	96872	18804	43361	29503	40133	32715	45327	35625	35727	24798	62579	73942	62627		36691	15914	14703	46565	11478	39218	15816	37553	27248	26051	34922	36302	50886	6992	22027	11235	15998	17819	21000	16752	14837	10682	31186
188	34338	35359	22679	66126	20576	63208	47338	79523	37111	45345	106793	78072	96923	18628	44722	29094	40457	32843	44900	35246	38850	24292	63108	73613	63574		36758	15725	14925	47108	11306	39366	15832	37714	26858	26162	35097	31340	50655	7123	20184	12573	15917	17687	20937	17889	15761	10159	30841
189	33920	35236	23140	67150	20648	63048	47158	80038	37788	45400	106635	78269	97625	18729	44335	28977	39723	32274	45106	34760	35309	24609	62491	74152	63209		36208	15622	14174	45895	11065	39175	16185	37794	27189	26153	34594	36519	51088	7226	20607	11416	22597	17598	20692	18022	16100	10269	31391
190	33688	35765	22776	65883	20112	64477	47085	80690	36976	44986	105717	79014	101505	17986	45014	29604	40629	32846	45302	35580	35528	24153	63706	73505	63862		36275	16051	14816	46499	11955	38894	16079	37868	27609	26715	34627	35961	49978	7169	20973	12576	19439	17439	21236	17531	15830	10339	31551
191	33464	35306	22925	67070	20692	44912	50959	81085	37271	45536	106067	78601	97868	18141	45371	29702	40776	32849	45262	34904	35570	24432	62915	73180	61970		36998	15887	14534	46330	11725	39482	15862	37822	27565	26165	35189	36578	49510	7394	21323	12322	19652	17740	21179	16839	15694	10117	31675
192	33276	35152	22232	66578	20591	46304	50853	80950	37515	45312	104394	77720	98339	18622	45807	29111	39680	32843	44122	34905	35937	24473	63848	73577	62928		37153	16016	14765	46366	11909	38199	16346	37774	26994	25657	34410	36560	49210	7463	23045	11561	19783	17510	21242	17269	15752	10514	31105
193	33552	35510	22654	66234	21248	43811	50791	80361	36761	45562	104108	78412	98332	18823	45118	28997	39959	33313	45090	34906	35610	23921	62782	73763	61849		36718	16226	14845	46325	12123	39090	16289	37007	26901	26521	34281	36404	48697	7115	21065	12896	20357	17578	20983	17989	15772	10278	30972
194	33725	35610	22369	66455	20649	43313	51079	81092	37237	45444	104582	78034	98057	18571	45918	28906	40192	32485	45068	35001	38619	24267	62899	73593	62524		36424	16313	14966	46399	11201	38173	15955	37621	27233	26275	34133	36616	51481	7277	23113	12239	20581	18010	21551	17684	15832	10749	30924
195	33802	35521	22069	66446	20489	42181	51669	80601	37821	45819	104158	77836	97710	18398	45531	29125	39848	33088	45395	35194	39372	24262	62388	73418	62247		36490	16467	14353	45630	11956	38569	15786	37614	26956	26931	34066	32567	53872	7187	21176	12029	21211	17546	21926	17943	15664	10525	30602
196	33958	35389	22200	66720	20053	49511	51235	80504	36722	45517	103791	78507	98131	18484	44465	28688	39915	32880	45127	34653	35062	24253	64135	72408	61733		36653	16582	14838	46152	12013	38971	15821	37695	27234	26564	33647	32042	49026	7027	20855	12876	20483	17547	21591	17621	15798	10241	30875
197	34015	35803	22479	66392	20632	50237	50973	80656	37420	45253	104630	78566	96489	18266	44942	29330	39941	33128	44594	34412	39736	24434	63010	72447	62063		35599	16130	14525	45984	11828	38990	15876	37470	27399	26276	32893	36399	49595	7278	21091	11646	23815	18047	21300	17536	15941	10000	30714
198	34335	35105	22565	66503	20525	42565	50006	80860	37531	45103	104284	78720	97990	18281	44668	28956	39854	32799	45301	34656	40646	24332	63325	71837	61821		36038	15895	14812	45711	11878	38422	15722	37300	26537	26309	33735	31550	49765	7067	20893	12686	20339	17803	21178	16993	15587	9836	31216
199	33693	35727	22697	66327	20657	43297	46640	79862	36622	45135	103198	77854	98925	18371	44525	29619	39344	33691	44944	34897	41657	24123	63154	71121	60739		35774	15921	14841	45565	12032	38310	15759	37297	26574	26450	33511	31681	50333	7012	21148	12956	20291	17718	21653	17371	15374	10213	30803
200	34501	34857	22701	66613	20795	43672	51169	81195	37056	45641	104561	78731	96859	18544	45742	29515	40027	33135	44966	34613	40284	23956	63073	66162	60395		35499	15538	14099	45409	12048	38623	15912	38421	26688	26835	33129	32147	49480	6987	20835	11569	20229	17614	21233	17014	15711	10232	30373
201	34150	35553	22254	66310	20545	43926	51230	81295	36811	45614	103326	77689	97194	20185	45389	28472	39709	33579	44102	34437	40695	24533	63494	69521	61525		35187	16131	14565	44186	12494	37881	15957	37730	27143	26989	33422	34395	50133	7211	20743	12665	20790	17337	21396	17795	15939	9728	30374
202	34527	35705	22596	66947	21071	43398	46977	79996	37541	44730	103685	78256	97798	18865	44845	29308	39379	33227	44613	34449	40691	24318	63026	63862	59893		37639	15722	14895	45865	12059	37794	16014	37545	26567	26459	32474	34667	50162	6507	20675	12944	20099	17591	21400	17566	15958	9945	30682
203	34377	35120	22721	66301	20780	62012	50547	81052	37819	45810	103087	78091	101308	18028	44669	29137	39910	32318	45026	34729	39612	23696	63266	61048	61039		37792	15909	14111	45357	11990	37344	15494	36527	26578	26560	32721	38307	50228	7364	20855	12926	23434	17349	21288	17490	16068	10053	31399
204	34303	35714	22186	66264	21177	44709	46913	79813	37374	45141	103232	77488	101740	18376	45139	29279	39794	33254	44506	33598	40115	23919	63138	71383	60016		37935	16084	14493	44520	11871	37468	16211	33025	26193	26514	32742	38522	50232	7307	20852	12620	23465	17300	21531	17509	15662	9954	31381
205	34589	35439	23087	66484	21073	45206	47877	80642	37527	45363	103067	77733	98225	18465	45400	29039	39949	33422	43312	33045	39560	23701	64433	70121	60467		37452	15757	14876	34542	11733	37269	15936	33278	26663	26410	32321	38198	50429	7278	20485	11290	19939	17304	21862	17100	15835	10180	31293
206	33921	34605	22811	66107	21248	62487	47345	79369	36996	46153	101582	78076	97967	18478	44894	28981	39490	33542	45290	34230	39853	23708	64232	66825	59431		38195	15552	14284	44564	11689	37197	16010	32651	26927	26933	32185	38081	50426	7248	20649	12822	23784	17520	21866	17223	15800	10045	31824
207	34735	35171	22518	66073	20852	62374	47670	79647	37059	45587	102206	78668	97303	18522	44664	29298	56482	33566	43915	33531	38851	23811	63923	63573	60874		37578	15619	13852	45175	11773	37549	15994	33052	26432	26798	31728	37822	49821	7289	20646	11633	20317	17249	21420	17482	15429	10704	31436
208	33874	35482	22545	65812	21136	44190	50425	80154	37006	45128	102738	77510	98182	18432	44903	29681	47634	33446	44564	34021	39332	22955	64307	72502	60798		37675	15461	14365	44333	11689	36728	16075	36374	26206	26539	32308	37565	50770	7176	20328	11831	23982	17464	21668	17725	16305	9882	31544
209	34736	35478	22198	66068	20037	43972	46350	79925	36764	45400	102872	78835	97407	18349	44811	28621	48617	34242	44241	33486	39159	23793	63288	72893	59863		37685	15886	14448	44148	11472	36752	15577	36766	25678	26494	32216	36988	49726	6920	20094	12702	19687	17315	21676	17311	16245	10109	31441
210	34254	34826	22036	66191	20036	43475	50529	79410	37218	45541	103517	78158	97779	18299	45028	28966	47834	34190	45059	32140	38925	24032	64825	73780	59950		37989	16053	14355	44339	11758	37058	16142	33275	26002	26365	32020	30644	50613	7357	20070	11398	19318	17153	22035	17346	16007	10429	31457
211	34304	35113	22257	66076	20854	43477	47213	80659	36380	45120	102023	78967	96920	18497	44643	28810	47791	33913	44859	33488	38628	23506	62742	72240	60613		37541	15588	14436	44424	11106	36546	15731	33638	26421	26658	31892	37046	50769	7463	21788	12909	19884	17005	21889	17103	16474	9921	31073
212	34435	35691	22346	65340	20732	43675	46768	80031	37236	45125	103454	79118	97529	17960	44936	29040	47498	33846	44872	33786	38770	23302	63868	72614	59916		37989	15565	14155	44079	10734	36451	15778	36590	25920	26210	31481	31361	50781	6962	19749	12503	23036	17600	22145	16960	16481	10154	31166
213	34739	35033	22850	64953	20660	43965	47463	80765	37186	45039	105252	78885	99070	17989	44648	29271	47486	33606	44254	33887	38803	23309	63363	72895	59698		37627	16161	14128	43831	10405	36869	15450	33443	25801	26277	37265	36938	49700	6798	20230	11434	19611	17664	21663	17183	16144	9674	31423
214	34736	35171	22503	66092	20723	45469	51235	80534	36942	45659	105461	79516	98039	18465	44249	29015	47770	33113	43882	33319	39087	23844	63234	72386	60222		37669	16320	14405	43569	10420	36262	15886	33982	25979	26332	37335	37910	50292	6850	19829	12343	20117	16868	21585	17145	16137	9766	31570
215	35540	35031	22607	65435	20728	45282	51568	80325	36326	45343	106880	78138	97942	18310	45204	28985	47274	33684	44864	34098	39142	23954	63412	72323	60032		37851	16239	14469	43978	9936	36337	15272	34196	25893	26186	37455	36992	50971	7097	20077	12253	19503	17138	21608	17110	15995	9809	31764
216	35601	35065	22801	65069	20531	44415	51210	80909	37283	45615	107287	77893	97276	17768	44607	29074	47138	32673	44868	34951	38668	23453	64122	71658	60815		37749	15826	14093	44425	9312	36133	15619	35004	26278	25794	37210	31305	50684	7200	19669	12767	23301	17283	21438	16780	16359	9804	31226
217	34902	35331	22594	64984	20221	45506	51016	80570	37210	45518	106832	77675	96597	18392	44939	29092	47921	33176	44716	34918	39474	24083	64359	71356	60022		37247	15622	13895	44114	8820	35694	15468	35059	26105	26372	36203	37385	49571	7314	19717	11614	19839	17092	21605	16825	16200	10021	30951
218	35176	35229	22428	65315	20129	44229	47484	80874	37116	45466	107217	77983	98093	19567	45535	28875	47685	33548	44671	34473	39210	23429	62910	71556	59429		37521	15587	14239	43474	8311	35588	15857	34038	25523	26722	31587	37247	49893	6959	19899	12742	22768	17883	21297	16994	16125	9746	31472
219	35664	30855	22662	64954	20292	45367	47552	80208	36581	45303	107367	76960	97869	18520	44814	28813	47604	33734	44772	33342	40227	23682	63929	70717	60059		37796	15941	13857	42965	8293	35245	15544	34508	25830	26183	37239	37665	49870	6920	19719	11214	23248	16892	21562	17321	15763	10049	30724
220	35651	30467	22795	64784	20470	43596	47200	79933	37208	46354	106837	77886	96340	18206	45373	28822	47557	32917	44673	34829	39466	23750	64037	70891	59979		37532	15660	13729	42035	8534	35117	15343	34736	25621	26496	36601	36638	50428	7171	19953	12089	15979	17154	21820	16747	15837	9989	30927
221	35554	30216	22502	64881	20519	43134	47128	80357	37250	45265	109316	77386	95064	18209	44376	29095	47960	33190	44776	33534	39189	23708	64067	69971	59292		36917	14599	13939	42903	8330	35417	15234	34977	25599	26213	36562	36611	49834	6331	20100	11827	15979	17294	21678	17270	15706	10030	31182
222	35607	31445	22026	64353	20757	43792	47640	79989	37286	46109	110224	77082	93875	18392	44924	28531	47568	33076	45286	34384	39345	23395	63946	70274	59868		37185	15491	14280	43241	8061	35311	16239	34902	25729	26798	36002	37034	50489	7154	19463	11408	22834	17345	21311	16965	15966	9968	30620
223	35174	31440	22379	63433	20595	42552	50138	78462	36455	44911	105816	77745	94611	18309	45042	28996	47271	33239	44940	33796	38952	23466	63736	69891	60278		37037	15350	13802	43204	8138	34174	15500	35043	25544	26805	35744	36897	49716	6649	19797	11425	19850	17389	21191	16935	15769	9869	30107
224	35334	30790	22549	63961	20072	43467	50475	79088	37069	46522	107914	76565	95349	17791	45429	28797	56278	32982	44269	33051	38887	24138	64158	70691	59738		37888	14403	14635	43161	8554	34903	16100	35468	25657	27370	35015	36726	50152	6918	19978	11553	23383	16956	21378	16718	15695	9827	31121
225	35971	30595	21798	62510	20153	43569	51076	80169	36752	45027	106365	76499	97599	18047	45812	28549	39659	33062	44382	33296	39637	23511	63405	70101	60178		37594	14437	14030	42533	8195	34568	15569	35334	25805	27069	29477	37255	50353	6604	19283	12768	22966	16809	21843	16526	15816	9869	30666
226	35548	31475	22071	61903	20526	44548	50756	79422	37557	45178	105235	77294	97098	18026	45670	28644	40324	32643	44917	33966	38533	23514	63735	70712	56225		37191	15546	14336	42882	8230	34098	15428	35965	25549	26860	35605	36814	50796	6920	19655	11480	19462	17067	21161	17072	15806	10228	30691
227	35687	31039	22009	61535	20419	44123	47431	79664	36627	45712	105768	69399	98688	18354	45438	28678	39621	33171	45712	32686	38806	23370	62971	70015	57851		37112	14357	13708	41964	8204	33744	15575	35859	26077	27277	35122	37181	50176	6737	19752	11498	22290	17426	21696	16670	15468	9955	30735
228	35811	31282	21694	62291	20413	43246	47265	78624	37197	45757	104295	76143	99766	18468	45921	28640	39055	32848	44360	32963	38141	23717	63872	69448	58611		36715	15987	14003	42413	8184	33649	15708	35998	25604	28012	35479	36130	49918	6987	19752	12411	16116	17405	21466	16810	15426	9604	30305
229	35750	31712	22131	62398	20262	44251	47521	79448	38266	45849	104648	75162	98756	18421	46388	28479	55610	32465	44605	33482	38327	25195	64353	69690	59424		37319	14323	14030	42689	8355	34120	15542	36334	25468	27477	34714	36632	49103	7099	19607	11834	15991	17101	21279	16328	15469	10103	30345
230	35727	31109	21853	62577	20343	43899	47390	79460	37233	45254	104032	84893	98731	18398	45997	28344	46460	33323	44216	33046	38342	23404	63979	69490	59001		37251	14308	13946	42532	7905	34223	15282	35744	25736	26828	35016	36277	49687	7246	19603	11997	22947	16926	21192	16801	15501	10018	29966
231	34861	31398	21600	63354	20508	42637	46757	79478	37437	45461	103104	86468	98797	18437	46530	28016	47373	32810	44453	33774	37402	23371	63396	70188	59545		37568	15460	13974	42428	8080	33227	15589	35552	25535	27346	34615	31278	48785	6951	19216	12720	19634	17166	21114	16922	15298	9727	30049
232	35302	31514	21956	63186	20127	43688	46407	79180	37905	45685	101572	87188	99693	18250	46997	28427	47057	32941	44575	33859	37108	23407	63773	69843	60216		36934	14988	13648	42258	7916	33225	15896	36226	25654	27811	34367	36403	48929	6837	19598	11821	19458	16937	21411	16743	15593	9687	29840
233	35599	31692	21472	64372	20206	44799	51295	80285	37181	44987	101102	86282	98699	18608	46152	28448	46919	33201	44253	33571	37862	23489	63733	69064	59357		36629	15631	14279	41333	8224	33424	15677	35690	25437	27392	34230	36377	49336	6789	19478	11323	23046	16965	21624	16551	15988	9715	30212
234	35545	31666	21437	63333	19984	42909	47515	79734	37385	45802	101351	85058	101302	18346	46784	28641	46847	33359	44421	32512	37609	22930	63693	68601	60105		37029	15590	13732	41986	8269	33283	15481	35405	25628	27571	33989	36336	49866	6859	19716	13020	19218	17414	21072	16593	16230	9795	30159
235	35842	32340	21576	64134	20687	43576	47025	79027	36585	45953	100410	81635	118914	18542	46183	29145	46312	32846	44703	33569	37162	23555	63076	69365	60385		34837	15564	13656	41929	8111	33166	15912	35916	25396	27426	34167	36463	49567	6059	19723	12872	22857	17455	21095	16753	15949	9619	29818
236	35071	31466	21536	63219	20470	43692	50612	78126	37204	45893	100572	81743	116948	17893	46644	28570	46761	32578	44091	33134	37332	23626	64152	69330	60687		34027	14227	13784	42263	8092	33626	15646	35643	25684	27705	34396	36500	50203	6963	20369	11992	19634	17094	20996	16402	15584	10294	30384
237	35149	31847	21805	63089	20246	43252	47219	78855	36913	45902	102299	70262	116331	18198	46541	28649	48011	33537	44891	32769	37247	23270	63811	69452	60101		33983	15374	13779	41613	8431	33295	15458	35796	25472	27747	34011	36520	50349	7085	19821	12224	22870	16593	21406	16317	15783	10012	30395
238	35210	31504	21971	63041	20437	44175	46737	79248	37156	45516	100891	72593	119266	17582	46533	28646	46706	33040	44289	33247	36891	22744	63204	68733	61866		34488	14036	13852	41850	8236	32491	15231	35636	25137	27850	34014	30791	49903	7045	20155	13433	19549	16576	21120	16141	15690	9895	30948
239	33162	32296	22675	63318	20515	43319	47275	77523	37344	46208	101302	71873	98342	18083	47753	28788	47056	32887	43986	33738	37010	23157	64299	69571	61927		34569	15273	13893	42175	7898	32980	15775	35570	25267	27547	33894	36596	50280	6873	20007	13499	23107	17037	21112	16471	16023	9149	30717
240	33463	32586	21980	63113	20619	61180	46728	78329	37051	46051	101114	72573	98320	18210	46418	28736	46948	33289	44870	33574	37921	23006	63295	69562	61898		34138	15133	13808	42324	8231	32429	15312	35653	25380	27364	34694	36512	50412	6924	19753	11803	23167	17075	21135	16615	15625	9648	30252
241	33540	32951	21980	63608	20282	43330	47149	78488	37175	46092	101307	72695	99136	19463	46561	28131	46236	33220	44092	33965	38210	23316	63767	69392	62909		34600	15389	13742	42078	8279	32215	15592	35633	25588	27740	34371	36683	50377	7207	20155	13042	19744	16559	21266	16036	15605	9786	30566
242	33742	32304	21453	63372	20584	42949	50421	78022	37229	46085	101525	72915	99486	17894	46330	29063	46062	33151	44558	32729	37766	24010	63615	69499	62448		34908	14080	13578	42148	7840	32217	15656	35712	25460	27856	34807	35811	50073	6772	19220	11740	19166	16368	21807	16100	15416	9432	30650
243	34294	32879	21371	62790	20717	61286	46215	76337	37515	46026	99983	72465	99768	17848	46804	28569	46674	32347	45238	31122	37976	22923	64222	69687	62177		34582	14119	13520	41264	8087	32486	15756	36154	25315	28298	33930	36130	49772	6896	19637	11833	23083	16696	21186	16211	15596	9595	30269
244	33561	32987	21700	63135	20288	43017	47628	76324	36956	46011	100428	73570	99566	18278	46905	27898	47549	32983	44865	32569	38066	22929	63638	70179	62518		34660	14064	13650	41614	8221	32627	15346	35995	25009	28146	34361	36392	48672	6654	20003	13334	23244	16415	21486	16484	15698	9213	29804
245	34488	32435	21560	63401	20763	42160	47219	75911	37392	45068	99781	73274	99177	18292	47548	27855	46496	32245	44733	31024	37971	23378	63354	68628	62235		34961	14736	13541	41339	8007	31484	15675	36546	25293	27791	33843	35571	48936	7058	19832	11523	19549	16407	21671	16365	15700	9636	29346
246	33963	32740	21336	63185	19806	42219	46787	74407	37531	46467	99192	73451	99261	18099	47509	29057	55293	32927	45760	31052	37599	23178	62997	68958	62359		34798	14147	13394	41341	8152	32101	16064	35823	25498	28148	33849	36528	49363	6788	19501	13086	19462	16168	21342	16836	14270	9445	29604
247	34687	32580	21589	63620	19880	41777	50372	74505	36897	46021	99106	74005	99246	18004	47867	27675	39094	33343	44881	33496	38896	23194	63442	68568	61591		34470	14007	13486	40958	8087	32119	15246	36289	25050	28425	33444	35930	49442	6657	19657	13346	19964	15863	21503	16357	16600	9724	29548
248	33620	32626	21629	64045	20520	42174	49775	75711	37355	45876	98584	72543	99009	17965	47691	28764	38908	33335	45399	32540	38043	23104	63464	68898	61227		34194	14283	13485	40285	7976	31499	15182	35900	25153	27938	33632	36056	49754	6808	19660	11975	22859	16076	21126	16487	13980	9586	28806
249	33319	33333	21604	63326	20337	42371	47196	75235	36413	46284	96935	73729	99412	17714	47285	27883	39306	33239	44265	33202	37314	24466	63656	69518	62442		33927	15336	13312	39619	8226	31964	15553	36435	25604	28098	34038	35708	49315	6624	19399	12890	22625	16274	21655	16673	16215	9474	28895
250	33675	33755	21608	63122	20363	42342	46762	77222	37422	46028	96526	73465	99612	17908	47215	28742	38951	34072	45175	32662	37186	24703	63470	69295	62549		34533	14385	13280	40455	7995	31892	15660	36102	25374	27871	33397	36112	49197	6914	19547	11442	19370	16480	21874	16216	14218	9291	29499
251	33599	30812	21355	63146	20266	41426	46718	76971	36671	46161	96336	73398	99025	18161	46191	28301	39341	33902	45385	32747	37543	23598	63854	67862	62216		34005	14291	13504	40462	8058	31382	15590	36729	25620	27650	33815	30804	49794	6822	19170	13321	19484	15974	21803	16037	14122	9477	28584
252	32484	32944	22440	62831	20569	42066	46983	78054	37427	44059	96325	72656	97890	18455	47389	28282	38977	33537	44090	32634	36411	22969	62903	69060	63210		33784	14508	13431	40422	8236	31298	15247	36372	25323	28060	33038	35479	50580	7142	18860	11890	19416	15659	21972	16817	15303	9409	29047
253	33394	28695	21924	63594	20293	41649	46731	77558	36896	44191	96453	72987	99483	17690	47246	28135	38375	33813	44612	32383	37172	22674	63440	69886	63610		33617	14569	13445	40291	8279	31595	15496	36354	24923	27927	33267	35654	50434	7215	19437	11529	19111	16162	21506	16774	15131	9608	28809
254	33701	30604	21795	62915	19857	42084	47058	77447	36909	44609	96606	73663	99574	17973	47220	28467	39449	33696	44529	32285	36972	23399	63821	69649	63141		33756	14413	13567	39919	8027	31360	15418	36026	24926	27768	33226	36381	50896	7057	19156	12733	22567	15680	21909	16881	15098	9260	28503
255	34803	30635	21659	62490	20057	41801	46203	75799	36978	45585	96046	72869	99326	18212	46852	27658	38841	33393	44397	32243	36806	22824	63495	69288	64597		33246	14327	13277	38799	7972	31340	15655	36226	24881	27409	33494	36268	50838	7215	19489	11602	22867	15586	21653	16664	15472	9295	28671
256	35321	31793	21399	61248	20156	41363	50031	76251	36771	45480	95865	72884	99353	17806	47019	27795	39174	33981	44124	32248	36849	22721	62791	70897	65063		35592	14226	13199	39918	8199	31337	15636	36223	24181	27468	33239	35858	50726	7092	19073	11752	19121	15954	21213	17287	15566	9340	28508
257	34792	33189	22134	60123	20086	41840	47138	75709	36888	45360	95504	73175	99261	18078	47450	28249	39522	33147	44452	31607	38937	22673	64378	69155	65316		36119	14667	13681	40162	8300	31360	15344	36691	24377	27058	33456	36235	50886	7148	19313	11497	22568	15678	22377	16048	15374	9350	28736
258	32673	29362	22007	61298	19951	41176	46766	76716	37123	44764	96301	72953	99892	18286	47492	27825	39502	33503	44732	32134	39148	22672	63201	69959	64762		34912	14643	13585	39448	8286	31009	15106	35720	25050	27576	33015	35665	51034	6947	19262	12486	23167	15997	21834	16087	15624	9287	28644
259	33193	29340	21585	61066	20010	41571	47279	77872	36577	49779	95284	72752	99093	17644	48414	28464	39211	33866	43679	32204	36835	23110	63314	69057	64565		35304	14512	13612	39942	8131	30587	15522	35504	24690	27395	32740	35482	50677	7019	19431	11383	19357	15674	21958	15840	15830	9119	28616
260	34480	29220	22469	61162	20610	42190	50305	77071	36808	46110	94783	72732	100104	17770	47338	28192	39297	33500	44062	32048	36987	23119	62910	69097	65139		35591	15493	13000	39624	8507	30276	15602	36047	24280	27272	32980	35055	51002	7430	18782	13237	22301	15855	21486	15799	16153	9008	28401
261	34131	28956	21645	60651	20536	41526	47091	77434	37037	45892	94240	73537	100049	18006	47660	27835	39660	33384	44101	31488	36953	23049	64179	68555	64495		35106	14592	13161	40047	7963	29880	15808	36260	25051	26896	32041	35487	50700	7105	18993	12855	22817	15419	21652	16117	15629	9272	28360
262	34683	28753	21849	61382	20705	41310	46185	76763	36010	46090	93653	72166	100073	17639	48478	28157	39394	33707	44697	32123	36952	24575	64374	68670	63233		35306	14469	13367	39906	8433	30253	15876	34970	24715	27261	32341	36056	51779	6962	19086	11600	22544	15701	21751	15800	16170	9447	28307
263	34668	29052	21602	61818	20066	41966	49990	77760	36850	45864	94029	72608	99783	18886	48819	28254	39339	33151	44893	31920	36451	22906	64839	69624	62712		34122	14240	13446	39576	7975	30272	15747	35286	25296	27384	32612	36416	50673	7012	18991	11895	16692	16014	21904	16123	15898	9245	28511
264	34520	29241	22126	62981	20379	41178	47135	77283	36480	45737	94790	72015	99738	18191	48461	28014	39351	32768	45815	31961	36967	23057	64593	69526	61972		33884	14566	13247	39466	8093	29675	15642	35976	24718	26685	32294	35654	51462	7219	18916	12171	22344	15400	21655	16368	15926	8913	28324
265	32218	29649	22115	62488	20292	41433	47115	77230	36794	45799	92965	71252	99932	17793	48898	28288	39012	32317	41846	31702	36692	22703	65499	69061	62030		33642	14575	13184	39503	8244	30021	15672	34673	24088	26469	32400	35318	50443	6979	18769	11711	16181	15927	21538	16631	16537	9211	28830
266	33155	29934	22252	63213	20569	41993	50618	76889	36852	45569	93979	72343	100617	17841	49219	28528	39398	32842	45713	31261	37249	22966	65508	69405	61863		35145	14431	12899	39333	8016	30483	16043	35276	24565	26647	32408	35606	51418	7199	19081	12930	14252	15586	21455	16998	16099	9200	28434
267	32980	29728	22032	62720	20238	40467	46700	76972	36890	45933	93422	71800	99766	17625	48460	28224	38968	33114	42387	32420	36844	23188	66126	68006	61923		35215	14148	13121	38915	7913	30200	15583	36071	24759	27141	31937	35820	51164	6740	19069	11889	16711	15397	21827	16407	15882	8779	28266
268	33426	32348	21943	62722	20311	40503	47225	76659	36790	45794	94302	71960	99865	18286	48602	27781	38973	32607	42759	32359	36318	23354	66048	68858	62042		35335	14397	13255	38992	7971	29878	15755	36127	24296	27224	32093	35876	51519	6903	19160	12118	14837	15653	21658	16676	16018	8800	27759
269	33330	32776	21521	62442	20331	41620	46555	76956	36372	45272	94455	72090	100020	18138	48544	28140	38533	32463	44964	32064	38811	23299	65646	68539	62003		34799	14527	13118	38920	8247	30132	15666	35322	24413	26507	32588	35694	50097	6810	19491	11837	14303	15639	21605	16475	16090	9229	28167
270	33484	33300	21994	63306	20136	41581	49592	76961	36291	45865	91879	72211	100616	17529	47935	27942	38490	32907	45872	30971	38768	22878	66083	68347	62076		35276	15098	13321	38675	8142	29185	15554	35390	24839	26812	32144	35514	50517	6474	18380	13012	14877	15316	21615	15500	16041	8858	28160
271	33873	33083	22279	62331	20397	41113	46515	76183	36403	45318	92037	72153	100702	18246	48102	27335	38731	32509	45891	30765	36881	23200	66380	68249	61403		35462	14441	13102	39655	8159	29368	15427	35876	24557	26938	32262	35690	49946	6897	18667	11827	15135	15153	21654	15442	15914	9289	27509
272	33582	33177	21732	62104	19769	41129	46406	76943	36367	45471	91472	72219	100137	17631	47926	28261	39338	32361	45922	32073	38711	23105	65895	68795	63251		33487	14176	13049	38714	8517	29896	15771	35367	24639	26461	32543	35922	50984	6641	19145	13064	15180	15516	21714	15353	16007	9060	28213
273	33110	32474	22343	62693	20543	40621	46675	76700	36337	45137	91537	70923	99047	18074	48392	28171	39443	32872	45708	32182	38469	22674	66128	68291	62472		32776	14399	13262	38492	8564	29346	15745	36147	24658	26073	32382	35540	50475	6938	19218	11867	14887	15254	22072	16769	16643	9062	28302
274	33780	33206	21388	62751	19963	41335	46947	76961	36841	45041	89931	70471	100243	17707	47458	27694	39006	33324	45455	31985	39038	23005	65885	67659	63142		32566	14394	13146	39173	8698	28696	15751	35469	24571	26194	32755	34985	50337	6912	19181	11377	15177	15023	21809	16431	16547	9397	28075
275	33968	32351	22037	62634	20393	41288	46762	77940	36424	44776	91016	70619	100028	17617	48013	27816	39105	32261	45918	32172	38405	23392	65908	68106	63741		32263	14614	13196	38901	8927	29706	15498	35397	23810	25698	32150	35537	50262	6543	18777	11945	15379	15290	21602	16273	16008	9111	27985
276	33735	34000	22162	63053	20230	41487	46786	77553	36931	45186	90822	71214	100422	17766	47687	27985	39343	33179	45999	30922	38723	23106	65333	67178	63196		32947	14160	12846	38130	8701	29126	15659	35310	24139	26028	31965	35100	49727	6824	19164	11547	15544	15291	21833	15510	16235	9483	28583
277	33501	33913	21845	62680	20148	40595	46302	76481	36960	44867	89730	70548	100388	18388	48349	28043	39416	32642	46561	32033	38493	22817	65946	68295	62802		32937	14441	13279	38530	8714	28839	15542	35785	24290	26616	32365	35478	50947	6975	18810	11378	15611	14961	21801	15576	16277	8870	27328
278	34659	34298	21772	62912	20347	40675	47101	77390	36402	45008	88932	70819	100639	18167	47505	28111	39364	32291	46371	32212	39333	23256	65988	67919	63351		32741	14186	13427	37868	8645	28689	15613	36081	24393	26083	31653	35465	49945	6200	18379	11983	14988	14462	22262	15352	15861	8990	27698
279	34593	29930	22056	62889	20086	40107	46220	77552	35852	45215	89557	70142	99983	18059	48192	28518	55969	31978	46089	31942	39348	23163	65715	68398	61984		31881	14062	12882	38101	8750	28725	15618	35390	24118	26073	32045	35235	50323	6792	18588	13093	15453	15192	21459	14927	16234	8811	27644
280	34477	30355	22265	62243	20222	41310	47083	77651	36663	45641	89437	71111	100604	17836	47667	27861	48101	32129	46454	31527	38865	23686	65921	68274	62569		32988	14036	12979	38062	9010	28847	15488	35773	24862	26182	31576	34777	49965	6944	18258	12129	15893	14532	21746	15013	15851	9243	27301
281	34132	30405	21425	62548	20476	42369	46975	77073	36864	45469	88651	71737	100010	17951	48602	28276	47356	32255	46377	31109	38940	22765	64779	67967	62920		32907	14261	13436	38006	9002	28516	15707	34902	24269	25893	31893	35292	49733	6871	18829	12176	14961	15112	21421	14854	16143	9015	27713
282	32499	30288	22130	62390	19956	40971	46492	76854	37297	45255	87688	71576	98161	17271	48065	27923	47623	32127	46356	31522	38739	22901	65009	68038	62243		33775	14464	12797	38441	9297	28335	15879	35823	24003	25830	31892	35329	49934	6927	18557	12234	14592	15061	21633	14465	15814	9189	27332
283	33077	30456	22066	62861	20120	40545	46589	77989	36942	45353	87001	71186	92937	18259	48457	27794	55277	32176	46982	31961	38381	23006	65727	67184	63323		32997	14548	13006	37539	9272	28060	15639	35326	23784	25954	31526	35135	50159	6648	18800	13361	15285	15102	21226	15528	16055	8828	27651
284	34339	31592	21911	62895	20233	40519	47323	78638	37484	45682	87135	71345	107203	18181	47791	27816	47130	32139	46383	31361	38784	23258	66489	67710	63951		32548	14349	13371	37886	9142	27798	16023	35894	23935	25407	32006	34443	50251	6745	18656	13387	15620	14564	21526	14800	16130	9232	27681
285	31763	31236	22399	62919	20674	40876	46615	77658	37489	44861	88079	71688	104565	17615	47776	27662	47477	31940	46831	31620	39325	23538	66409	67083	63656		33436	14363	13699	37620	9401	26986	15340	35143	24391	26383	31472	34765	49935	6506	18961	13100	15401	14253	21461	14442	16369	9073	27126
286	33660	31563	21784	62504	20701	40650	47201	78210	37568	45158	87301	70983	104211	17906	47746	28103	47723	32055	46229	31624	38005	23191	65955	68214	62609		31618	14276	13001	37632	9182	27660	15496	34930	24187	25604	31514	34808	49850	6692	18422	12579	15889	14931	21058	14581	16067	8967	27242
287	34197	30921	21592	61757	19987	40473	47236	77556	37927	45458	87200	70776	105258	17708	47822	27415	47479	31817	46249	31281	38113	23107	65380	66923	63733		31460	13982	12861	37908	9430	27559	15527	35539	24211	25313	30988	34883	49575	7046	18335	11900	16371	14301	21632	14649	15993	8999	27117
288	36906	30574	21323	62991	20690	40448	46141	76670	37691	45419	87823	71718	95184	17410	47592	28405	47607	31583	47130	30758	38796	22939	66015	67110	62969		31889	14391	13241	37986	9487	27583	15919	35490	24096	25646	31152	35347	48557	6698	18115	12963	15862	14350	21465	14357	15942	8992	26902
289	34840	30192	21420	62856	20368	39830	46915	76575	36976	45658	87271	70995	98819	17903	47256	27245	47842	31361	46867	30865	37974	24961	65349	66860	63914		31887	14131	13042	37513	9248	27787	15449	35175	23885	26240	31495	34809	47387	6717	18409	13491	15960	14931	21412	14742	15626	8706	27258
290	34132	29222	21357	62346	20073	39776	46348	77071	36997	45375	86351	70924	100440	17793	47247	27668	54675	31570	46428	30868	38355	23027	65796	66848	64382		31698	14397	12794	28939	9544	27323	15901	35125	24220	25634	31159	35192	46110	6758	18599	13234	16225	14712	20812	14505	15871	8814	26982
291	33093	33827	21549	62773	20254	40100	49911	76263	36396	45587	87530	70016	98300	17560	47781	28030	40094	32021	47051	31860	38014	22787	65537	67455	63885		31852	14582	13318	37991	9171	27378	15625	35221	23963	25384	31130	34777	46432	6358	18040	11921	16350	14604	21083	14079	15864	8779	26922
292	32350	33766	21975	62762	20323	40922	46254	75984	36554	46146	88243	71722	97314	17919	48116	28179	38854	32218	46608	31198	37825	22529	66297	66451	64453		32021	14273	13329	28535	9387	27062	15397	35293	24001	25503	31136	35013	45453	6935	18374	12132	16933	15057	21563	14077	15381	8698	26768
293	35606	32953	21780	62220	19960	40802	46242	76386	35949	45886	88278	70909	94055	17975	48278	27638	39673	32571	46598	30767	38356	22757	66444	67615	66027		31849	14144	13415	29032	8804	27322	15466	35853	23926	25952	32064	35320	46160	6945	18178	12510	17386	15007	21132	14179	15874	8637	27063
294	35232	33031	22120	63180	19745	40675	46952	77055	36365	45022	87318	72365	91885	17184	47473	26893	39645	32516	46068	31256	38221	23140	65639	66622	68231		32105	14703	12687	28839	9825	26887	15517	35388	23648	25418	30647	34408	47339	6961	18496	12134	19241	14455	21097	14221	15546	9214	26951
295	35648	32609	21879	62616	20372	40493	46418	77209	36215	45345	87192	71856	91111	17263	47697	27178	39211	32594	46090	31578	38275	22839	65244	66912	72896		31689	14011	13503	28841	9859	26907	15486	34932	23818	25974	31218	34864	49297	6907	18040	12509	19976	14482	20825	14691	16027	8756	26533
296	35132	32841	22404	62942	20525	40617	46223	77521	36129	45232	86791	71690	91085	17853	48116	26748	38893	32870	45894	31433	38031	22311	66019	66610	75718		32095	14701	12830	28789	10229	26720	15825	35315	24099	25296	31141	34547	48336	6953	18625	12726	19770	14523	21180	14787	15716	8783	27089
297	35281	31927	21752	62091	19769	40366	47252	76021	36218	44855	88359	73186	95653	17711	48728	27108	39762	32323	46469	31385	37376	22749	64581	66766	76968		32386	14193	12857	29071	9701	26717	15255	34878	23351	25442	30203	34679	48228	7093	18160	12539	20671	14302	20830	14847	15973	8747	26878
298	35218	31898	21913	62343	19533	39739	47323	76415	36798	45557	87334	72732	99413	17987	48169	27732	39794	33345	45863	31577	37923	22910	64892	66957	75335		32127	13882	13092	28685	10184	26621	15874	35187	23569	25364	30007	34679	48377	6605	18842	12762	19278	14316	21439	14510	15617	8651	26917
299	35321	32067	21702	62861	20104	40782	46427	76039	37359	45641	85848	71803	98882	17607	49012	28141	39983	33453	46345	31366	37919	22794	65020	65696	75839		32356	14378	13050	29293	9640	26630	15367	34653	23984	25567	30581	35048	48687	6332	18212	12297	21033	14132	20892	14137	15719	8803	26396
300	34893	31993	21618	61963	19618	40809	46582	77222	36381	44836	86929	71627	94545	18009	49193	28174	39760	33327	45462	31430	37924	22516	65598	67468	74783		31734	14638	13010	28167	10056	26026	15087	34822	23624	25330	31138	34459	48439	6933	18923	11531	20707	14631	20775	13990	16248	8730	26801
301	34975	31936	22188	59842	20360	40786	46622	77655	36494	45393	87177	70191	108839	17776	50360	27874	39664	33680	45164	30772	37655	23484	65197	66611	74486		30876	14245	12623	28525	9848	25870	15581	34921	23585	24797	30107	34382	48842	6556	18445	12852	20880	14535	21008	14376	15861	8637	26851
302	34997	31098	22057	59672	20593	40967	46317	77055	36751	45398	86522	71069	107352	17752	50076	27858	40758	33185	45463	29434	38058	22048	65528	66709	73934		30888	14714	13207	28969	10043	26173	15670	34221	23554	24717	30000	34511	48007	6670	18644	11939	21657	14374	21049	14239	16237	8578	27270
303	34550	31309	21945	58759	20166	40254	47615	77388	36107	45104	87311	70959	106281	17707	49814	27915	39626	33116	45774	30902	37933	22564	64843	66813	73274		31120	14206	13159	29451	10040	26145	15222	34926	23463	25334	29946	34502	47933	6495	18421	12896	21303	14154	20967	14111	16323	8674	27311
304	34255	30195	22248	58852	19791	40477	46721	77072	35910	45865	87918	70672	113626	17823	49602	28243	39769	32675	46441	31378	37395	22771	66391	66903	72543		31266	14378	12971	28854	10396	26213	15483	34633	23644	25053	30311	34815	46224	6723	18618	11594	21354	14083	20902	14287	16199	8180	25938
305	33834	31151	21815	58980	20051	40542	46795	76905	35954	44992	87532	70960	115154	17741	49728	27267	39988	32892	45856	31024	37961	22453	65292	66922	73869		31780	14447	13276	28816	10475	26604	15332	34582	23632	24693	30160	34463	53075	6803	18318	13008	21447	14422	21253	13953	15949	8465	26205
306	33812	30257	21820	59251	20233	39527	46195	76198	37157	45198	87432	70468	97690	18009	49889	27365	40230	32846	44878	31583	37215	22556	66175	67459	73049		30603	14461	13294	28481	10446	26328	15046	35001	23280	24989	30447	34789	49956	6889	18532	13048	20565	13883	20904	14674	15930	8484	26435
307	33984	30929	21959	59477	20139	38772	46111	76609	36285	44416	87106	69940	98304	17674	48956	27737	39913	32743	45619	29547	37738	22541	64963	65681	71535		31611	14076	12733	28640	10521	25651	15267	35158	23849	25196	29746	35006	48632	6890	18451	12919	20450	14011	20920	14254	15938	8562	26347
308	33348	30828	21304	60817	19896	57042	45808	76878	36308	45189	87289	70372	99574	17803	49994	27729	40108	32875	46676	31060	37384	22343	66308	66307	71696		30462	14535	13303	28794	11083	25608	15328	34788	23459	25483	29576	34133	47708	6476	18608	13283	20919	14175	20643	13881	15670	8795	25844
309	32891	31243	22107	61487	19982	55820	46531	76677	36212	45861	86370	69153	100201	18040	48882	27548	40435	33197	45607	29389	37807	22629	65089	67447	70170		30855	14512	13042	28342	11402	25757	15426	34735	23364	24844	28849	34068	47123	6942	18216	11814	20693	14249	20811	13903	15525	8462	26420
310	32673	30316	21559	61165	20185	57699	47233	76920	35869	45646	85330	70686	99912	17870	48986	27383	40155	32784	45116	30927	37437	22680	65290	67320	70721		32855	14474	12787	28067	11428	25605	15379	35069	23724	24872	28034	34634	46781	6982	18405	11698	21302	13936	21166	14046	16023	8612	26434
311	32568	33465	22755	61237	20845	39649	46859	76883	35983	46342	85029	70228	99806	17461	48702	26880	40215	33101	44982	29323	37373	22218	65428	67030	70771		32391	14249	12664	28509	11761	25875	15668	34644	23497	25191	32623	34046	48329	6987	18712	13333	17703	14374	20577	13751	15575	8388	26063
312	31258	33378	21781	62139	20004	39888	46800	76034	36562	45369	83720	70139	100188	17672	48486	28331	40237	33864	45823	31584	37281	24018	65233	66826	69787		32419	14509	13354	28699	11864	25683	15372	32940	23537	24957	31724	34620	50040	6673	18315	13220	17096	13632	20716	13770	15653	8606	26318
313	30866	33398	22283	61357	19915	40694	47191	76107	36409	45525	84238	70133	99867	18543	47559	27405	40998	33487	45373	30763	37967	22477	65049	66446	69785		31392	14145	13276	28351	11881	25175	15353	32273	23383	24573	31653	33952	51344	6720	18477	13179	22527	13493	21104	13695	15532	8922	26092
314	33185	32824	22453	61783	20371	40135	46721	76771	35663	46133	83950	70127	100635	18060	48637	27442	40586	34341	46107	30859	37575	22230	65219	66886	68963		31660	14311	13238	28769	11767	25984	15302	32078	23295	25083	31919	34358	50360	6471	18469	11589	21598	14011	20667	13858	15779	8207	26426
315	32989	29754	22205	61812	20339	40460	46910	76980	36561	45014	83575	69448	100651	17848	49137	27569	40887	33728	45103	31077	37222	22097	64356	67357	69603		31046	14432	12649	28494	12174	25027	14836	33259	23232	25286	27231	33970	43986	6676	18531	12763	21908	13937	20553	14498	16016	8615	25956
316	32294	29011	22158	60888	20258	41456	46408	76879	36571	45579	82466	70327	99834	17777	47806	27949	41121	34799	45081	30276	37452	22484	65518	67475	69415		31189	14224	12831	28900	12156	24969	15548	31776	23065	25022	28998	34289	45640	6277	18538	13115	22282	13762	20887	13888	15873	8707	25754
317	31658	29185	22264	61933	20755	40400	47006	75963	36348	45932	84002	70521	98810	17426	48255	27250	40570	34288	44994	30557	37348	22527	65300	67452	69119		30363	14324	13421	28439	11649	25004	15515	32683	23120	24452	29782	33925	46002	6849	18350	11508	21691	13904	20679	13818	16028	8556	26148
318	34025	27979	22169	61641	20120	41141	46829	76521	36486	44830	82120	69807	99073	17776	48159	27200	41567	34589	46597	30581	37231	22375	64879	67261	68885		30684	14506	12938	28046	11428	25165	15159	32605	23526	24809	29802	33635	45201	6549	18254	13093	21686	13676	20692	13779	15667	8632	26248
319	34197	32272	21884	61100	20020	41233	46958	76716	36760	45032	82602	70620	99260	17912	47845	27306	41171	34392	45386	30669	37602	22418	64053	67156	69003		28022	14288	12669	28490	11444	24847	15284	32503	23234	24569	29992	33757	49973	6612	19941	11852	21960	13931	20846	14150	16055	8645	25358
320	34100	32107	22302	61587	19683	40313	46262	76668	35998	44872	82095	70262	99946	17868	46877	27653	41562	35162	45335	30726	36850	21658	63377	66803	69330		29319	14597	13088	28373	11732	24721	15061	32659	23361	25044	29300	34079	48343	6770	20389	11771	21328	14074	20608	13975	16000	8537	25985
321	34646	31326	21444	61561	20754	38982	47046	76757	36383	46063	82335	69534	100223	17824	46981	27153	41651	33810	45286	30486	36723	21751	64751	66648	68592		31397	14201	13131	28295	11707	24109	15253	31995	22716	25496	29770	34505	44863	6746	20052	13272	21637	13632	20932	14150	16003	8828	25925
322	32971	31528	22319	61144	20302	45526	46489	76546	35484	45271	82515	70369	100015	17455	47489	27691	41560	34179	45956	30639	37242	21964	64491	67427	69278		28934	14360	13071	28308	11528	24904	15009	32156	22687	25134	29768	34242	44176	6651	19767	12987	21731	13919	20492	13746	15955	8732	25920
323	33450	31844	22129	61522	20288	45019	46345	76511	35725	45428	82406	70257	100194	17006	46802	27516	41842	33357	46492	30804	36311	22094	64854	66690	69700		26466	14296	13437	28549	11808	24402	15615	32037	22964	24829	29250	34231	44482	6615	19918	13117	21370	13258	20566	13953	15785	8343	25920
324	34922	31599	21682	60345	19895	45143	50301	75863	36317	46892	82420	69163	99895	17669	47516	26896	42162	34073	45263	30736	36248	21564	65352	67308	70137		29723	14081	12487	28065	11586	24390	15177	32972	22783	24985	29837	33923	45133	6402	20632	12565	21124	13661	20529	13769	15775	8535	25840
325	35285	30663	21856	61360	20610	44942	50645	76212	36143	44613	82466	69615	100204	17945	46017	27960	41783	33733	45876	30090	36859	22205	65242	66810	70848		30224	13792	12886	28123	11382	24553	15562	32209	23456	24772	29540	33785	43865	6856	20172	11497	20621	13534	20188	13608	15737	8333	26199
326	35820	30395	21838	62331	20004	40309	46538	76286	35672	44891	80789	69882	100687	17801	46515	27246	40966	33605	44427	29968	36870	22184	64752	66636	69186		30452	14372	12064	27955	11382	24561	15521	32529	22195	24976	29801	33755	44726	6583	20238	11490	20741	13865	20486	13946	15967	8242	25776
327	35095	29883	22274	61699	20634	38823	46611	76394	36515	44746	82196	69839	99810	17804	47531	27413	47191	33697	44817	31024	36362	21654	65593	66680	69290		29985	14197	12931	28504	11173	24485	15013	32445	22896	24340	29766	33782	44255	6817	19956	12907	20446	13490	20685	13852	16669	8462	25956
328	34663	29180	22251	60879	19773	40224	46053	76592	35291	44795	81638	71199	100638	17443	46079	27284	41462	33610	44825	30386	36617	22156	65360	66176	68609		29273	14063	13188	27882	10969	24646	15322	32562	22728	25316	29581	34118	43678	6651	18479	12869	20044	13983	20553	13792	16366	8366	26057
329	34152	30570	22317	61855	20065	39679	45688	76686	36088	44369	81370	69734	99250	18028	45284	26890	42625	33542	44813	29903	37067	21745	65872	67051	69184		29640	14014	12985	27679	11022	24145	15357	32267	23287	25104	29434	33672	46299	6764	18781	13131	20052	14029	20674	13012	16464	8558	25484
330	35609	31411	22455	60640	19911	40510	46346	75879	35820	44982	81980	70474	101113	17663	45419	27745	41386	33617	44825	30586	36081	22236	66654	67729	68420		30855	14240	12839	28202	11173	24234	15175	32271	22843	24934	29383	34057	50243	6468	18842	11668	19903	13631	20486	14422	16128	8283	25844
331	35393	31079	22371	61062	19790	39895	45617	76274	36006	44246	82167	70019	100868	17807	45346	27075	41522	33244	45135	29866	36542	22583	66330	67222	68677		30252	13917	12858	27921	11162	24467	15369	32409	23086	25331	29067	34305	44012	6914	18818	13060	19767	13737	20505	14187	16322	8400	25561
332	35147	29972	22079	60560	20264	41858	46642	75518	36342	45094	81588	70051	99909	17224	45979	27395	42154	33432	44907	29896	37019	22166	66850	66195	68273		29338	14393	12846	27639	10865	23886	15836	32808	22789	25498	29535	33296	46102	6440	18854	11538	19327	13766	20701	13244	16291	8629	25862
333	34830	34144	21539	60247	20151	39944	46210	74467	35592	44754	81419	69820	100091	17654	44990	27296	41746	32879	44233	30069	36778	21950	66117	67258	68576		28518	13927	12751	28062	10642	23489	15575	32632	22313	25073	29988	33705	46291	5779	18975	11529	19625	13943	20416	13394	16134	8399	26314
334	35025	34321	21764	59295	19863	41682	47244	74537	35524	45155	81581	68696	100379	17460	45183	27499	41879	33422	45566	29866	36085	22237	66130	66005	67667		28728	14132	12729	27588	10584	24087	15357	33200	22461	24756	29510	34505	47083	6647	18792	13045	21265	13585	20435	14613	15999	8353	25604
335	34326	30064	22188	58896	20564	40150	47574	72967	36529	45908	82323	70157	99855	17935	45623	27340	41782	33605	45971	30220	35543	22383	65779	66125	68226		30516	14069	12420	27854	10868	23836	15475	32860	22234	24909	29800	33282	46956	6610	18505	12949	21776	13658	20589	13452	16097	8379	25578
336	35090	31121	21533	60050	20162	40728	48374	74067	36126	44451	83014	69962	100363	18055	45937	26676	42335	33836	45794	29664	35805	21876	65813	66145	68046		31348	14096	12890	27436	11044	23479	14887	33393	22209	24683	30510	34364	47074	6800	20512	11461	21276	13256	20273	13375	16005	8492	25392
337	35604	33748	22241	59136	20112	40431	48886	72509	35695	46274	84469	69360	100515	17670	45876	26234	42627	33399	46438	29370	35939	21298	65506	66322	67668		27801	13644	12737	27598	10877	23992	14774	32863	22646	24254	30700	33853	47083	6856	20790	11306	21247	13304	20184	13274	16093	8420	26019
338	35663	32991	22107	58271	20587	41617	48929	72154	35315	44564	83718	71275	97819	17385	45467	27689	41962	33880	45545	30610	35901	21533	66436	66592	66789		28484	13652	12870	27920	10788	23728	15368	32751	22364	24521	30585	33564	47042	6531	18562	12578	20954	13624	20229	13426	16208	8395	25267
339	36270	32393	22318	57990	20022	42476	48135	73116	34810	46755	83833	70844	95032	17225	45458	26506	41434	33227	45900	29965	35317	21276	67117	66208	67639		28864	14237	12625	27804	11069	23806	15333	33046	21952	24708	30468	33693	47385	6680	21635	12514	21031	13564	20518	13409	16193	8184	25714
340	35590	31950	22076	58678	20204	41298	48513	72916	35147	44949	84943	69871	109107	17828	45958	26803	33450	32920	45857	30286	35944	22005	66619	66095	67532		29060	13631	12794	27749	11329	23853	15437	32900	22496	24772	30250	33735	47340	6608	21727	13325	20942	13559	20283	14294	16384	8338	25929
341	35022	31714	21912	59002	19875	40924	47619	73665	35215	45239	84433	70879	104789	17401	45856	26685	41897	33063	45130	29959	35163	21752	66909	67023	66954		29241	13994	13139	27670	10734	23552	15462	33032	22422	24768	29883	33426	47050	6518	21332	12162	21165	13671	20361	13975	15728	8756	25650
342	35809	28100	22352	58084	19753	40980	46220	74898	36097	45095	84247	70675	101361	17394	45214	26537	41832	33483	46213	30213	35281	21384	67069	66627	67627		27985	13914	13108	27734	10716	23817	15657	33087	21936	24587	30065	33676	46956	6505	21136	12689	21628	13245	20134	13792	15912	8150	25862
343	34919	28276	21881	59117	19945	41628	46164	75233	36106	44624	84437	70836	97534	17646	45787	26334	41711	33344	44379	30452	35290	21650	67291	66718	67035		29697	14099	12891	27852	10991	23727	15611	33164	21848	24189	29821	33839	46798	6303	21126	12817	21457	13076	19874	13278	15670	8129	26156
344	35718	27951	22177	59259	19934	40284	45534	74999	35668	46522	83750	70508	96237	17688	45211	25460	42384	33367	46045	29087	35513	22925	67267	66462	67179		28159	13971	12677	27939	10955	23360	14834	33276	21858	24992	29699	33561	46493	6913	19355	12849	21272	13176	20207	13347	16028	8484	25457
345	38948	28886	21818	58986	19664	40618	46412	74228	35387	45351	83454	69419	98696	17117	45468	24545	42048	34129	45316	30746	34598	21777	66601	65939	66781		24823	13766	13082	27634	10725	23993	15464	32935	22016	24951	29662	33632	46149	6445	19053	12570	21166	13410	20070	13172	15864	8211	26242
346	38014	28849	21675	59602	19769	40322	46156	75886	35060	45998	83432	69922	104251	17144	44995	25278	42428	33652	45617	28792	34528	21618	67123	66372	66565		27801	13859	12715	27643	10664	23508	15177	33132	22049	24333	29634	34044	46579	6757	19480	13002	21085	13382	19899	13881	16070	8502	25274
347	40102	34274	22061	59159	20201	40817	46126	74513	35729	45638	83831	70290	110680	17861	44799	26417	34176	34023	45918	30849	34734	22306	66714	66943	66871		30332	13514	12889	27772	10420	23632	15704	32693	23386	24970	30001	33815	46732	6828	19154	12353	21130	13459	20297	13740	16039	8192	25599
348	37873	29854	21768	59543	20030	40280	49247	75414	35978	45269	83346	71508	96690	17060	48712	26157	41770	33516	45602	28709	35573	21486	67337	65221	66070		30312	13260	12658	28174	11073	23079	15219	32481	21900	24959	29463	33649	46093	6325	19339	11327	21061	13718	20380	13144	16139	8712	25363
349	36261	31545	22378	58861	20171	40407	45706	75248	35620	45760	83028	71627	98768	17208	49184	26240	47852	33553	45069	30560	35008	21485	65501	66610	66476		26434	13658	12707	27362	10738	22912	15472	32534	23479	24810	29897	33420	46598	6383	19006	11505	20730	13518	19849	12977	15902	8623	25158
350	36282	31615	22369	58461	20149	38909	52010	74510	35600	45627	83711	74126	99653	17264	48793	26644	46309	33499	45685	29677	34998	21938	66871	66199	66418		27221	13564	13003	27988	10566	23321	15132	32427	21810	24802	29591	33262	46642	6599	19077	12742	16427	13470	20305	14069	16206	7999	25487
351	36012	30756	21578	58915	20021	39545	51698	74252	35642	45172	82931	76737	99717	17302	48254	26690	46155	33981	45438	30107	34444	21369	66449	66595	66289		27781	13796	12796	28024	10652	22837	15563	32487	21825	24591	29691	33523	46367	6673	18687	12893	17168	13151	19503	13011	15856	8229	25758
352	37726	30328	22734	57714	19978	39754	52178	73353	35606	45534	82938	77097	100001	17378	48062	27200	46247	33289	45946	29647	34692	21091	66266	66360	66981		26464	13637	12798	28125	10288	23420	15250	32775	21703	24527	29093	33305	46398	6621	19469	11363	21995	13394	19774	13044	16387	8169	24916
353	37139	31736	21699	65042	19964	38714	51894	72671	35882	45351	82653	77389	99423	17706	48335	27110	46997	33290	45194	29047	35040	21760	66018	66508	67970		27325	13782	12702	27705	10449	23786	15472	32964	21678	25209	29181	34097	45793	6863	19081	12885	21750	11831	19897	13430	16702	8036	25028
354	36586	31783	22661	56574	19571	39160	50685	71484	35658	46045	81432	77146	98690	16991	48128	26793	42265	33595	45662	29640	34218	21548	66442	66192	66850		25853	13364	12862	27607	10779	23281	14811	33257	21945	24640	28949	33474	45650	6638	19038	12785	22012	13094	19674	13599	16274	8989	25285
355	35099	31345	21832	55854	19750	43978	49935	70576	35996	45531	82315	76717	100298	17485	48952	27145	46648	33660	45660	29495	33949	21453	65626	66436	67000		26968	13812	13015	27682	10347	22904	15353	33093	21370	24413	29342	33121	45761	6825	19074	11227	22531	13292	20179	13186	16361	8650	25239
356	36792	28684	21887	55529	19882	44067	50524	71870	35567	45058	80254	76746	99482	16903	49647	26820	46962	33296	45304	29252	36849	22828	65911	66862	67180		27530	13754	13167	28076	10340	23102	14999	32175	22926	24788	29173	33156	46856	6299	18954	12399	22537	13475	19890	13211	17311	8395	25329
357	38392	29239	22351	55210	19597	43959	49407	72955	36012	45204	80068	77318	99638	18531	49420	26742	47634	33651	45046	29585	34499	21170	66156	69675	66954		25562	13677	12714	28007	10511	23091	15097	32933	21221	24773	29114	32600	46738	6654	18926	12647	22395	13133	19791	13662	17377	7211	25255
358	37534	29712	21936	57158	20064	43955	49376	73130	35738	45168	80634	75820	98206	17490	50136	27193	47183	33728	44501	29317	37123	22818	65724	69717	66976		26106	13658	12538	27786	10127	23349	15425	32690	20865	24884	29237	33102	46804	6675	18938	11599	22599	13005	19832	13432	18240	8600	25490
359	37180	30585	21965	58026	19913	37618	49953	74007	36027	45923	80673	74971	98446	16768	49320	26617	42510	33764	44721	29397	33963	22223	65962	70051	66377		26622	12996	12744	28061	10264	22825	15310	32416	22949	24722	29445	33256	46443	6703	18998	12442	22490	12890	20113	13978	19028	8095	25160
360	34872	30582	22199	58823	19663	38205	45316	73963	35373	45126	78640	75601	98236	17044	49106	26088	42378	33336	44550	29247	36856	20403	65222	70004	65732		25166	13167	12775	27713	10198	23002	15032	32630	22830	24753	29920	33305	46413	6389	18580	11322	22843	11398	19773	13624	18601	8325	25180
361	36201	31359	22706	58112	20186	38965	46696	74081	36093	46643	79175	75065	99535	17971	43667	27076	47458	33674	44966	29527	33910	21398	64933	69815	66812		25960	13318	12606	27861	10075	23142	15721	32373	22653	24686	28846	32961	45950	6651	18747	11998	22301	12785	19696	13604	18745	8945	25444
362	34659	30675	22558	58370	20250	39089	49534	74728	35719	45408	79790	74287	98524	18106	49692	27376	47722	32979	44121	29258	36576	21711	65362	70187	66225		28004	13510	12197	27806	10243	23563	15553	32141	22610	24882	29202	32708	45874	6297	18567	11691	22295	11830	19810	13310	18478	8200	25520
363	35087	30944	22018	59017	19918	38412	49648	74130	35736	45921	79555	74183	98541	16933	44482	27076	48155	33725	44519	29430	36862	21437	65350	69431	66496		28691	13720	12785	27925	10533	23430	15457	32495	22553	24303	29125	33029	46974	6600	18626	11898	22323	13233	19824	13106	18340	8827	25459
364	35241	30635	22083	57883	19471	38855	46043	73521	35969	44758	79286	73531	99612	17034	50123	27266	48978	33024	44607	29185	36678	21406	65551	69789	66731		27383	13843	12498	28443	10222	23244	15255	32440	20796	24926	29103	32457	46216	6610	18830	12084	21767	13287	20271	12704	18774	8280	24882
365	34769	30668	21799	57233	19674	39185	45897	73912	35438	45087	78695	73599	98269	16914	49885	27061	49429	33266	44834	29241	37023	22013	60960	70028	66753		27285	13694	12803	28043	10161	23218	15305	32419	22737	24617	28409	33237	46593	6652	18571	12774	21279	11828	19887	12947	18524	8328	25093
366	35385	30823	21739	56694	20069	38113	46678	74096	36554	44338	79304	74113	99674	17050	49619	26631	49670	32584	44747	28727	36525	21445	65650	69947	66259		27495	13622	12872	27052	10347	22810	15065	32599	21172	24505	28576	33342	46789	6658	18216	12990	20789	11319	19943	12884	18207	8333	25468
367	34370	30414	21941	56878	20368	39084	49087	74846	35737	45065	77935	73935	98610	17112	49898	26879	49313	33077	44220	29097	35905	21175	64988	69590	66083		24715	13459	12773	27765	9989	22982	15113	32101	22836	24938	28297	32599	46164	6588	18750	12819	22607	12777	19892	12869	17907	8250	24903
368	36194	30922	22224	57113	19584	38326	46548	74333	35561	45655	78316	74990	99336	17003	49959	27057	49692	32465	44659	29365	37212	21125	61823	69237	65283		25405	13761	12885	28160	10767	23014	15181	32832	22548	25000	29135	32885	46318	6621	19001	12555	22666	11395	19875	13040	18081	8418	24963
369	35887	30937	22395	56492	19773	38623	49271	74830	35813	44887	78534	73207	98129	16846	44255	27265	49851	32826	44320	29005	33702	20965	60555	70802	64720		25062	13707	13046	27618	9928	22668	15338	32462	22695	24868	28070	33001	46138	6438	18885	12541	22282	11155	19893	12575	18096	8234	25227
370	36962	30650	21740	57489	20117	38358	49388	75039	35514	45158	77911	73626	98818	16432	49547	26919	49250	32441	44911	29124	33733	21946	60874	70143	65242		25669	13667	12770	28052	10921	22243	15078	31586	22336	24107	28112	32736	46419	6604	18309	11393	21619	11821	19266	13006	18141	8250	25214
371	35364	30351	22188	57643	19823	38312	46262	74515	34933	45532	78030	74445	96042	16697	44112	26898	49732	31932	43817	29741	33998	22816	65475	69462	65701		27378	13112	12533	27571	9774	22474	15312	33903	22468	24491	28068	32291	46425	6366	18687	11601	20335	12895	19821	13238	18234	8673	25039
372	35591	30755	22382	57752	19101	38857	49895	74177	35240	44531	78758	74323	110670	17001	50117	26836	48910	32143	44292	29648	34050	23430	61520	69677	65320		28223	13804	12898	27730	10165	21916	15536	33684	22263	24656	28469	32607	45609	6660	18185	11326	22862	11821	19547	13114	17700	7960	24937
373	35921	30951	22375	58345	19843	40195	49368	74372	34727	44840	77794	73851	107839	18198	49305	27135	49650	32186	44894	28973	34731	21436	61407	69303	64972		24348	13988	12604	28188	10178	22090	15438	33100	22500	24298	28692	32825	46028	6229	18121	11556	22607	13006	19365	12754	17603	8280	24942
374	36094	32896	22346	58805	20117	37844	49852	74048	35514	45260	77431	73122	107117	16650	49862	26986	50068	32247	44933	28568	34215	20971	61803	69816	65251		24360	13582	12981	27450	10652	22581	15389	33224	22870	24755	28824	32320	45793	6811	18146	12173	21933	13167	19073	12675	17501	8733	24978
375	35807	28565	22451	59441	19531	37930	49279	73019	35501	44659	78683	81593	106683	17025	50372	26712	49655	32410	44359	28868	35321	21380	61638	70409	64754		24204	13620	12462	27365	10176	22064	14815	33365	22177	24037	28387	32382	45353	6324	18393	12604	18810	12920	19563	13237	17657	8231	24700
376	35298	29886	22331	58853	20172	39065	46343	74651	35379	45969	77843	81871	93958	17554	49225	27185	49563	33377	43919	29022	34746	20962	61388	70172	65121		23888	13384	12681	27261	10123	22063	15002	30701	22415	24401	28176	31887	45934	6620	17760	12321	10086	13248	19583	13045	17609	7753	24633
377	33907	30416	21706	59161	20195	38400	45766	74277	35699	46059	78179	73542	97381	17689	50181	27518	49750	32634	44324	28492	35002	21412	61613	67263	66143		24866	13609	12691	26771	10197	21717	15124	31705	22527	24311	28158	32504	45966	6483	17920	11011	19966	12799	19942	13114	17606	8125	24327
378	34548	30868	22374	58875	20119	38362	49602	73825	35333	43762	78233	74319	97811	16821	49511	27332	49598	32634	43894	28648	34783	21150	62560	64896	65916		25512	13669	12737	26123	10425	22338	14906	32428	21143	24549	27939	32421	45257	6880	18404	12566	17190	12749	19141	12851	17519	7818	24512
379	34012	30782	22194	59163	19567	37395	49525	74861	35031	43962	77813	74984	98751	16696	49454	25703	49546	33070	43672	29350	34887	22248	62770	62272	67238		23482	13613	12551	25726	10196	21522	15634	32185	22045	24644	27201	32582	45422	6754	18012	11825	21063	12372	19273	12803	17077	8697	24177
380	35076	30988	22302	58589	20134	38448	45595	74350	35388	45989	78401	75340	98500	16811	49878	26919	49936	32358	43979	28925	34631	21365	62259	62512	67149		26711	13128	12634	25326	10021	21775	15299	31687	22567	24674	27978	32237	45453	6763	18064	11239	20662	12736	19573	12871	17614	8338	24498
381	35161	30126	23298	56832	19912	37779	49332	74617	35463	45358	78279	74713	98965	16565	49114	27168	49914	32536	43433	29598	34010	21218	62297	60701	67463		27655	12983	12623	32254	9957	21510	15006	32326	22691	24229	27722	32873	45309	7046	18497	12059	20479	12503	19704	12994	17232	7867	24414
382	35766	29953	23299	56701	19584	37556	45644	74113	35226	45971	77974	83663	98529	16777	48243	26551	50563	32402	44877	27952	33880	21305	62468	61218	68679		25828	13406	12489	32161	10284	22047	15265	32332	22551	24790	28067	32824	45437	6819	18437	12586	20384	12625	19678	13297	16927	8198	24633
383	35844	30183	23502	56478	19535	37347	46006	74229	35226	45708	77562	74594	97648	16410	48516	27591	50021	33105	44288	29282	33676	21424	63326	61549	68614		26194	13626	12424	32279	9811	22185	15217	32629	22403	24859	27761	32763	45107	6623	18457	12457	20567	12551	19063	12451	17103	8391	24726
384	37242	29656	22976	57285	19730	36959	49853	74967	34787	43371	77032	73757	96310	16250	48735	26565	50588	31712	44636	29372	32892	21069	63364	61187	68854		26236	13461	12826	32360	10154	21220	15394	32623	20586	24453	27801	32834	45339	6821	18132	11398	20623	12707	19542	12994	17096	8240	24494
385	36380	32809	23358	57517	20019	36845	46130	74403	35375	45381	77335	72888	113594	17304	49232	26837	50471	32723	43472	29048	32696	21262	65517	59837	68405		26319	13476	12672	31866	10159	21730	15400	32540	22723	24096	28004	33301	45298	7000	18336	12513	21411	11585	19002	13520	17006	8396	24960
386	34298	31355	23325	58515	19586	37409	45597	73644	35600	44048	76912	73211	97286	16151	49351	26865	50320	32606	44020	28721	32652	22489	64913	60872	69254		24673	13227	12831	31848	9817	21637	15065	32306	22606	24111	27754	32383	44855	6936	18435	12916	21243	11511	19337	12130	17101	8121	25964
387	35576	32193	22892	58408	19955	36766	46189	74211	34860	44675	76561	73530	98550	17705	49976	27179	49877	32279	43965	29108	32520	20916	64144	61001	68318		24312	13507	12797	31882	10135	20955	15050	32915	22263	25200	27755	32294	45450	6492	18988	10931	21029	11987	19278	13208	16774	8186	25879
388	36184	31435	22243	58714	20287	37492	46018	73761	34763	45204	77722	74056	98296	17853	48910	26831	50532	32854	44157	28647	34898	20932	63350	61390	68114		27002	13695	12858	32732	10082	20972	14646	32267	22433	24227	28141	32558	45292	6409	18585	12770	21279	11364	19480	12431	16894	8315	25312
389	35229	31046	22580	58075	19933	35991	45785	73887	34826	42889	77377	73976	97184	16788	48875	26868	49836	33506	43961	28782	35825	21079	63171	60316	67765		24626	13018	12684	32250	10169	20815	15203	32094	22872	24321	27677	32337	45737	6537	18276	12597	21709	11254	19121	12384	16562	8078	25460
390	35420	31724	22375	58028	19739	36000	45976	74314	34121	43912	77842	73677	96529	17731	49322	26176	50278	32871	44426	28324	35265	21057	63166	59971	67556		24578	13307	12668	32045	10226	20947	15122	32224	22702	24754	27839	32546	44825	6482	18192	12416	20733	11321	19332	12182	16970	8321	25864
391	35090	30116	21938	58342	19578	37080	45788	73522	35114	44566	78022	74437	96095	17767	48697	27161	49847	32409	44161	28535	35026	22070	63385	58820	67359		24910	13223	12854	31885	10410	20955	15131	32645	22477	24252	28078	32832	44947	6505	18341	10978	22078	12733	19185	12344	17035	8017	25716
392	35377	32523	21993	58217	20355	37009	45770	73167	35030	45170	78248	72788	97006	16744	48838	27013	49561	32347	44047	28659	35141	22490	63318	58864	67896		25105	13273	13030	31563	9911	21175	14951	32641	22339	24664	27991	32592	45655	6668	18169	11835	21940	12500	19683	12400	16812	8745	25495
393	35453	31906	22371	58959	20061	36412	45452	73880	34826	45244	76807	73903	96868	16522	48837	27651	50521	32524	43908	29130	35511	21009	62782	74388	67629		24959	13629	12565	31751	9488	20758	15501	32665	22134	24399	28028	32769	44675	6588	18144	11980	22264	12245	19208	12562	16885	8367	25401
394	35265	32574	22160	58834	19875	37455	45868	73578	34957	44665	76734	73159	97602	17389	49646	27438	50809	32024	44573	29387	35436	20738	63276	73380	66585		25692	13201	12361	31824	9961	21166	15024	32235	22917	24698	27719	32292	44977	6608	18475	11277	22523	12783	19296	12988	16731	8437	25273
395	34438	32938	22389	58063	21000	36426	45658	73628	34910	44117	76857	72510	98675	17482	50355	26861	49967	32302	43788	29143	35140	22384	63660	73924	67711		25771	12666	12669	31336	10010	20798	14994	32219	22117	24876	26770	32513	45089	6664	18238	11890	22264	11516	19060	12271	16927	8478	25912
396	33359	29143	22326	58035	20248	37802	45990	73605	35097	43409	75197	71435	96415	17894	50682	26393	49796	32363	44702	28856	35627	20617	63372	74058	67228		25951	13510	12541	31631	10397	20817	15075	33424	22465	24657	27375	32554	44920	6429	18205	12349	22213	12675	19335	12298	17054	8510	25517
397	33265	30856	21826	59174	20339	37276	45377	74196	35154	44852	75894	81007	96867	17895	51688	26999	51432	32104	44467	28721	34874	21324	63725	73799	67038		25834	13282	12565	31935	10012	20741	15086	32395	22460	24834	27826	32634	45250	6898	18092	12428	21835	12804	18843	12921	16447	8191	26145
398	33325	31734	22033	58105	20116	36046	45964	73212	34688	44998	75270	80923	96990	17678	51661	27197	50870	32077	43754	28874	35060	20437	63344	74044	66724		26145	13344	12188	32186	10058	20243	15242	32972	22335	24631	27857	32906	44712	6344	18166	10882	21910	12332	19488	12390	16739	8228	26318
399	34029	34873	21776	58105	19917	36321	45235	72093	34805	43291	74875	84271	97240	18141	53436	26601	50681	31835	43635	28823	34562	20779	63945	73707	66600		25873	13479	12409	31880	9932	20312	14961	32806	22647	24899	27780	32514	45311	6635	18135	12567	23165	12398	19524	12432	16365	8196	25829
400	31570	33646	22048	58318	20290	36285	46079	73976	35304	43439	74476	84077	98033	17570	53340	26625	50624	31934	44808	28810	34523	20521	63735	73742	66555		26442	12947	12875	31018	9723	20707	15112	32701	22267	24804	27546	32504	45246	6407	17936	12610	19752	12531	18951	12765	16244	8563	25973
401	29322	31444	22588	57784	19963	36623	45672	74398	34940	45194	75309	83513	97453	17901	53643	26361	50691	31986	44155	28662	35091	20564	63585	75041	65633		25898	13144	12656	31724	9936	20220	14941	32574	22064	24607	27841	32751	44806	6414	17881	12614	17625	12405	18843	12839	16848	7874	26482
402	29892	32056	22251	57042	20403	36682	49020	73265	34841	45173	73770	83077	98296	17489	53900	26656	51297	31106	44782	28007	35872	20723	63437	73650	66096		26321	13440	12133	31693	10187	19938	15028	31974	21851	24719	27685	32772	45449	6348	17847	12628	17349	11619	19154	13122	16637	8100	26341
403	29362	31443	21979	55143	19899	35925	45386	73732	34733	44596	73715	83467	97179	17406	53278	26527	51763	31055	44403	28137	35059	20640	64107	73090	65792		25577	13126	12663	31306	9751	20544	15382	32580	21861	24581	27221	32886	44527	6656	18130	12044	16740	12224	18951	12735	16390	8107	26082
404	31842	30529	22438	54566	19833	36525	45100	73255	34365	44594	74253	74176	95958	17476	52584	26515	51149	31481	45698	28539	34983	21193	63817	73490	64893		26025	12828	12572	31234	10567	20280	15439	33057	22531	24228	27942	32304	44488	6469	18462	12322	16263	12821	19158	13061	16457	8171	26285
405	31100	33205	22064	54415	19920	36866	45960	73499	35660	45170	73366	75000	111078	17276	52810	26942	50971	30953	44464	27960	32555	21211	64839	73594	65551		26059	13190	12443	31162	9715	21018	15352	32283	22266	24401	27881	32927	44873	6608	18345	12403	16377	11432	19038	11967	16687	7953	25582
406	32093	34367	22341	55260	19523	36691	45463	73145	35147	44892	74139	75764	104564	17611	53029	26656	51644	31068	44222	28414	34884	20661	64478	74059	64577		26821	13088	12229	31361	10314	20398	14964	31987	22245	24596	27679	32577	45077	6699	17962	12224	16743	12203	19224	11683	16509	7907	26245
407	32493	32992	21784	55150	19611	36018	45129	73024	34705	45303	74098	76910	99088	18264	52875	26628	51029	30813	44412	28249	35324	20503	65455	73028	64789		25783	12961	12483	31350	9950	20713	14902	32592	21842	24444	27814	32331	44156	6409	18217	12339	16754	12461	18930	11666	16267	8160	25556
408	32523	34130	22496	55527	19945	36717	45812	73364	35405	43557	73772	77692	93652	17375	52922	26966	51381	31676	44684	28220	34458	20185	65032	72994	65222		25299	13300	12160	31349	10015	26808	15081	32633	21827	24120	27919	32184	43591	6206	18130	12759	16792	11477	19140	11731	16499	8233	25484
409	33338	33413	22244	55843	19591	36208	46336	73378	35420	45643	73783	77490	90668	17575	52910	26433	51652	30491	45061	28294	34893	20511	64569	72667	64932		22659	13224	13034	30821	10168	20562	15230	32223	22170	24408	27652	32541	42255	6736	18239	12331	17267	12501	19178	11406	16319	8431	25775
410	35443	34239	22307	54638	18868	36376	45876	73052	35035	43530	73147	77816	90080	18396	52625	26749	50769	30697	45483	29267	34605	21100	64751	72706	64438		22735	13076	11876	30622	10259	20184	14596	32799	22296	24186	27829	32594	42255	6338	18565	12348	17786	12188	19458	11418	16361	8368	25516
411	36026	33718	22376	56646	19410	35761	45225	72574	34945	45223	73559	78323	90656	17780	52903	26828	51161	30950	44488	28132	34688	20156	65267	72898	64997		23059	15549	12247	31129	10051	20596	15135	31686	22261	24466	27619	32276	41991	6594	17882	11112	18154	11144	19192	13658	16398	8125	25845
412	36644	34187	22102	55988	19911	36027	45616	72414	35274	45892	73182	77828	95916	18535	52945	26913	51236	30279	44347	28475	34928	20810	64205	72703	65537		23344	15494	12447	31233	9707	26601	15020	32653	21983	24536	27675	32751	42705	6516	18487	12646	22836	12243	19472	11641	16788	7899	25450
413	36693	33764	22283	57136	20036	36984	45436	72265	35424	43290	72067	77866	105389	17954	53538	26335	51267	30526	44250	28632	32869	22049	65776	73033	65552		24294	13340	12374	30931	10090	26701	15666	32122	21779	24475	27775	32973	43615	6396	18141	12450	23166	11585	19330	11705	16468	7886	25770
414	36542	33871	21470	56538	20313	36930	48999	72176	34930	43829	73801	77846	111058	17365	54815	27040	50859	30917	44117	27993	34460	20057	65326	72160	65339		23600	13165	12793	30901	10036	20487	15243	32303	21898	24626	27461	32036	43751	6600	18049	12415	23301	12298	19084	12861	16650	7920	25816
415	36931	33924	21917	56980	19985	35905	45859	71870	34575	45228	72425	77486	94743	17491	55617	26661	50962	30308	44319	28365	35369	20778	65138	72319	64625		23726	13112	12084	31258	9674	26568	15341	32658	21841	24080	27251	32035	44229	6816	18008	12379	23179	11956	19190	13572	16406	7817	25477
416	36881	34046	21966	57074	20128	36056	49620	72387	35649	44959	73018	77673	97737	17580	55920	26570	50677	30147	44151	27855	34483	20664	66017	73078	65883		23540	13154	12029	30800	10193	20287	15058	32412	21994	24355	27584	32472	44636	6416	17777	11070	23561	12475	18579	12595	16977	8308	25369
417	35489	32777	22136	57106	19335	35582	45569	72826	35373	44965	72804	77389	98023	17698	56466	26644	51402	30249	44445	28431	34716	20717	65350	71877	66139		24305	13134	12148	31142	10006	26231	15220	32649	21820	23954	27863	31956	44911	6711	18332	12450	23394	11930	19383	11651	16387	8170	25332
418	35858	31105	22242	57112	19847	35833	49560	72802	34940	45346	73301	76933	96433	17395	56109	26000	51548	30240	44488	28206	35339	20920	65874	72030	65454		24420	12961	12207	30623	9950	26790	15027	32344	22006	24192	27867	32226	45264	6889	18160	12382	23014	12203	18729	12773	16617	8010	25570
419	35333	34505	21763	56565	19582	35377	45297	72198	35075	45399	72286	76205	97852	17564	55325	25947	50935	30572	44029	28297	34403	20399	65667	72878	65363		24432	13181	12201	30592	10151	26623	15114	33038	21799	24316	27539	32371	45654	6783	17675	11974	22858	11405	18678	12635	16773	8161	25278
420	36889	33309	21973	57172	19809	35847	45475	72168	34779	45521	71950	77056	97848	17233	55558	26254	51109	30455	43669	28347	35193	20360	65444	71281	64291		21300	13004	12259	30475	9966	26472	15376	32309	21657	24276	27745	32354	44981	6270	18258	12426	23452	12537	18705	11952	17116	7936	24990
421	36995	32512	21663	57177	20218	35160	45496	72322	34862	45158	71249	76661	98100	17999	54882	26131	50830	29785	43847	28728	34654	20490	65767	72589	64485		22248	13218	12176	30442	9846	26310	14811	32549	21875	24204	27881	32881	45057	6444	18045	11684	23298	11090	19452	12341	16495	7736	25720
422	35622	32927	22216	56854	19119	37498	44637	72167	34739	45564	70979	77009	98217	17699	54652	26609	51121	30033	43696	27741	34063	21232	65752	71534	64332		22367	12802	12355	30261	10095	26654	15008	32509	21798	24161	27893	32864	44706	6537	17923	12225	22836	11273	18744	12333	16789	8363	25155
423	35389	28277	21458	56866	19855	36030	45064	72652	34510	44424	70881	76471	99826	16969	54506	26159	51319	29553	43431	28819	34870	20494	65691	72024	63855		21686	12402	12363	30664	9936	25744	14793	32045	22012	25149	27558	32548	44116	6609	17953	12621	22980	11783	18722	11705	16891	7962	25611
424	36430	33445	21837	57024	19929	36260	48618	71838	34638	43700	70949	76333	99354	17317	55027	26266	50238	29991	42825	28009	29961	20944	65332	71767	64117		22779	13297	12691	31073	9820	25564	15384	32315	21990	23908	27827	32094	44284	6531	17908	11892	22930	11021	18569	12467	16505	8369	25560
425	36289	31004	21748	57400	19766	35003	45047	71764	34842	45592	71338	76921	100738	17331	54828	26563	51280	30248	43717	28219	34831	20474	64956	72356	64145		22001	12993	12026	30336	10131	25877	15116	31777	22101	24856	27412	32927	44294	6414	17983	12668	23319	12471	19031	11671	16827	8301	25076
426	35429	30918	21399	56751	19250	36288	45077	71246	34819	45105	69513	77794	100586	17820	55028	26763	51098	30231	43509	28175	29929	21139	65977	70571	63462		22336	13005	12446	30312	9917	25775	15602	32016	21945	24624	28012	32392	43755	6596	17824	12157	23268	11872	19134	11529	16662	8309	25556
427	36094	30492	21699	55954	19080	35448	44398	72497	35242	45270	70618	77340	100869	17307	54165	26030	50521	29444	44406	27689	29639	20988	65616	72490	64124		22249	13033	11770	30599	9814	25502	14884	31806	21619	24742	27643	32762	44436	6744	17635	12431	23151	11241	18636	12132	16707	7551	25355
428	39165	30436	22150	55542	20216	35036	44426	70599	34110	45694	70371	86850	101131	17982	53451	26440	51400	30340	44515	28025	29373	20796	65282	72681	63391		22054	12507	12455	30728	10433	25784	15319	32004	21987	24635	27314	32014	44713	6583	17795	11699	23586	11154	19559	11255	17147	8036	25227
429	37224	29966	22218	56093	19753	34752	49122	69001	34738	43720	70667	78914	102435	16984	54192	26382	50242	30288	44083	28589	29781	20854	65241	72014	64069		22198	12908	11887	30009	9866	25690	15361	31509	22034	24592	27307	32456	44393	6574	17768	12409	23031	11635	18492	12415	16899	7879	25451
430	37389	30502	21597	55519	20089	34077	45723	67413	34977	45346	70658	78692	101557	17591	54596	27122	50035	29870	44220	28404	29732	20174	65076	72358	63624		23606	12841	12197	29549	10081	25543	15350	30889	21753	24078	27350	32418	44578	6423	18020	12416	22780	12000	18721	12372	16950	8273	25411
431	33705	30056	21075	55489	19721	39765	45135	67020	34453	45453	71412	78426	101313	17715	54413	26400	50498	29807	44465	27884	29166	19911	66076	72095	64423		23789	13022	12076	29884	9594	24957	15670	31954	21241	24303	27057	32381	44704	6620	17911	12705	22656	11276	18823	12062	16534	8365	25042
432	36344	29357	22091	56153	18888	39968	45486	69097	34659	44853	70918	77095	100666	17777	54463	26313	50115	29913	44361	28564	30037	20629	65472	71603	63819		24275	15270	12786	29833	10109	25542	15152	31173	21092	24202	27072	32473	45040	6734	17722	12776	22729	11081	18653	12644	16829	7820	25085
433	36210	29392	21783	55106	18967	40741	45064	69187	34573	45142	71097	86989	100521	17062	53797	26238	49691	30530	45721	28482	34104	20627	65917	72157	64479		25164	12713	12571	30056	10064	25727	15298	31802	21766	24972	27538	32740	42684	6584	17392	12304	22275	10929	18493	12129	16316	8224	24741
434	35190	33514	21432	55255	18997	39758	44882	69493	34154	45747	70505	85884	98952	17065	53145	26561	49647	29430	45169	28359	29331	20222	64954	72247	62792		23230	12857	12172	30488	9837	25286	14971	31442	21558	24546	27443	32738	41298	6430	17860	12435	22547	12487	18587	11634	16157	8216	25292
435	34484	33956	21042	56176	20054	39532	44448	67811	34675	45033	69536	82915	97786	17257	54054	26662	49804	30043	45520	27543	30073	20303	65401	72233	63633		23602	13545	12117	30032	10252	25310	14873	31763	21459	24345	27243	32904	40635	6614	17314	12490	22505	11451	18954	12890	16499	7918	24588
436	32724	33166	21770	55895	19920	41479	45650	69189	35055	44749	69972	80903	97432	17696	54106	26769	49871	29856	45528	28151	29652	20190	65342	72533	63293		24021	12692	12509	29755	10208	24582	15697	32429	21562	24394	27049	32012	39874	6370	17781	12446	22758	11071	18763	12104	16439	7767	24713
437	34835	33272	21690	55441	19241	34165	44837	69068	34103	46072	70061	81612	97331	17446	53365	26870	48974	29886	45208	28200	29713	20648	65595	73096	63252		23513	13306	12330	29665	9943	24767	15365	32002	21811	24595	27397	32484	39369	6642	17607	11721	22520	11443	18715	11775	16405	8218	25149
438	36370	32629	21818	55505	19963	34883	44971	68961	34073	45647	69831	71970	97992	17399	53354	27119	49450	30353	45270	27966	29999	20332	65462	71894	63512		21456	12803	12477	29818	10219	24041	14996	31977	21834	24528	27381	32564	41667	6370	17805	11645	22180	12160	18617	11162	16144	8284	24626
439	40438	31776	21569	55438	19597	34387	46398	69097	34442	45456	69639	73237	98269	17145	55133	26684	49529	29701	44320	28128	29778	20170	65416	72101	63272		24201	12559	12696	29371	10199	24277	14730	31326	21910	24091	27391	32059	44235	6506	17673	11925	22902	11826	18636	11243	16244	7867	25217
440	38995	29479	21783	54691	19613	41907	49296	69424	35014	45767	68783	72288	99082	17082	54104	26560	49497	29394	44471	28059	30007	21024	65101	72875	62872		23730	12690	12540	29276	10115	20293	15237	31645	22036	24421	27435	31916	44816	6362	17865	12275	23033	11903	19170	12244	16296	7780	25047
441	41501	28286	21697	53606	19836	42036	49918	69210	34809	45473	69071	72501	98564	17415	54278	25144	49765	29866	44673	27992	29488	20433	65572	71674	63205		23170	13080	12554	29209	9773	19208	15272	31847	21523	23807	27584	32414	44600	6503	17859	12480	22402	12073	18423	11315	16274	7719	24863
442	43343	27907	22030	54067	19193	41899	49105	71237	34648	45642	69467	72198	98609	16906	53667	26242	49962	29465	45119	27816	29486	20537	65425	71436	63466		23180	13077	12196	29646	9970	18726	14668	31816	21470	24293	27455	32387	44436	6596	17743	11401	22280	11875	18558	11453	16181	8721	25078
443	45556	28106	22378	53851	19821	41940	48847	70826	34740	45260	68987	72577	99143	17219	53875	25542	49270	29800	44152	28101	30007	20099	65877	71889	63652		22737	15620	12374	29375	10026	18953	15000	31946	21652	24523	27481	32776	44054	6580	17887	11879	22940	11967	18734	12257	16206	8075	24855
444	46396	27200	21999	53246	19335	41824	49180	71452	34343	44150	69132	72490	99531	16586	54199	25614	48955	29245	44659	28263	29530	21015	65635	71544	62659		23438	13037	12522	28913	9863	18942	14945	32175	21738	24423	27164	32782	44426	6561	17634	12194	22502	12129	18539	11364	15783	8610	25190
445	44536	28130	22626	53807	19904	41416	49361	71129	34235	45396	68420	71998	99879	17322	52626	24086	49807	29481	44695	28000	29973	20771	65915	72772	62989		23329	12928	12658	28627	9695	18325	15484	31705	21328	24056	27368	32180	44054	6545	17421	12450	22256	11978	18525	11667	16239	8278	24949
446	46888	28107	21282	54811	19847	41023	49220	71442	34645	36340	69163	72586	99137	17477	53308	24585	50106	28496	44497	27925	29756	20356	65223	72057	62091		24099	13030	12236	29131	9899	19043	15384	31664	21440	24511	27186	28869	44029	6472	17511	11996	22822	11844	19025	11361	15807	7999	24759
447	46505	27614	21559	55596	19788	33029	45042	70863	34596	45658	68453	71718	99199	16765	53361	24964	50445	29172	44047	27804	29955	20524	65631	72496	62193		24039	12779	12056	29114	10070	18759	15268	31707	21754	24889	27333	28704	44798	6553	17357	12224	22496	12042	18835	12653	15548	8546	25107
448	46008	27732	21613	55736	19864	34213	48501	71108	33962	45135	67451	72051	98945	16878	53109	25884	53021	28600	44080	27739	30290	20378	65604	71718	63355		22196	12795	12638	28393	9602	18536	15196	30948	21506	24365	27281	28951	45254	6280	17383	12333	23486	11257	18714	11214	16363	7602	24329
449	45998	28021	20910	55570	19432	34997	45076	71215	35387	45821	68261	72303	99142	17425	53296	26893	50419	28708	43208	28732	29761	20622	65201	71667	63697		19194	15179	12374	29017	9942	18556	15402	30944	21391	24554	26662	29517	45034	6461	17399	12357	22352	11074	19106	11187	15615	7779	24207
450	45367	27658	21295	54626	19165	35386	45142	71055	34736	45009	67940	72560	99248	16765	47832	25883	49905	28885	43914	27938	29931	20494	65214	71782	63313		19961	12785	12187	29290	9828	18719	15398	31626	21735	24117	26816	29222	43986	6378	17691	12399	22328	11000	18649	11426	15919	8197	23970
451	44959	27740	21137	55050	20093	34994	45129	70946	34484	45286	69823	72238	98388	17964	52829	26190	49478	27920	43220	28283	29453	20140	65804	71190	63939		20260	15263	12684	29448	10024	18847	15312	31339	20884	24209	27173	29370	43773	6600	17391	12026	23123	11026	19126	10991	16210	7740	24519
452	45127	27508	20944	55643	19409	35253	45824	71075	34769	45549	71447	71974	98436	17040	53054	26620	53813	28325	43420	27475	30198	20754	65191	72109	62690		19643	12699	12388	28968	10071	18956	15339	31538	21512	23874	26979	29403	42995	6329	17781	11653	22235	10903	18848	11219	16364	7826	24633
453	44219	27640	21337	55743	19553	35721	45310	71088	34327	45241	65230	72369	98553	17506	52705	26119	54491	28551	43892	28157	29572	20074	64751	72216	62342		19812	12595	12250	28757	9910	18167	15257	31231	21646	24192	26517	29566	41223	6461	17572	11965	22244	11022	18909	10949	15564	8059	24780
454	42018	26498	22237	55513	19864	35423	45434	71261	34701	45171	64443	71800	98724	17372	46664	25792	53973	28009	43217	27647	29887	20472	65602	72811	62273		22431	15239	12364	28703	9783	18318	15192	31275	21568	24292	26493	29008	41226	6460	17556	12137	23586	12100	18930	11021	15556	8539	25015
455	42585	33853	22565	55295	19928	35041	45257	71368	34645	35788	64519	71831	100126	16839	52259	25856	53779	27923	44558	28174	30047	20402	64630	71819	62916		22593	15187	12632	28682	9945	18412	15488	31003	21586	24595	27315	29517	41634	6528	17896	11452	22484	12022	18959	11329	15940	8230	25050
456	41883	31026	22175	54675	19496	34825	45617	71390	34775	45268	65473	71677	99058	16775	46704	26255	54255	28334	43515	27764	30043	20238	65126	71817	62098		22294	12437	12371	30358	10022	18717	15077	30741	21661	23970	27547	29056	41035	6479	17781	12220	23217	12095	18751	11941	15846	7137	24692
457	40360	30795	21404	55470	19864	34648	45501	71609	34612	44399	63809	72239	114381	16798	51994	26599	54136	28852	42692	27723	29623	20562	64875	71675	62304		22483	12475	12483	30211	10063	18054	15009	31416	21470	24839	27084	29340	42621	6409	17656	12448	22410	11136	19023	10919	15665	8527	24588
458	39131	33694	20516	55050	19470	35016	45183	71895	33866	36238	62631	72112	111641	17030	51641	26274	55016	28126	42856	27901	30005	21598	65853	71314	61819		19941	15136	12589	28406	10129	18450	15191	31033	21135	24537	26868	29174	44186	6480	17804	12160	22019	11689	18888	11148	15634	7990	24150
459	39249	30836	21381	55822	19424	35001	45028	70692	34988	36426	69860	72090	110535	16534	52150	26093	53745	28560	42682	27153	29036	20755	65051	72222	62644		20626	12540	12539	30641	10171	18113	15143	31417	21817	24803	27352	29179	44429	6467	17494	12098	24090	12126	19191	10945	15475	7977	24469
460	39174	33084	22303	55135	19864	35457	44943	71787	34317	42286	69864	71544	108972	16816	52227	25957	53445	27695	42930	27070	29772	21113	65323	70990	62701		20586	12446	12187	30346	9935	18414	15074	31340	20975	24770	27413	29143	43461	6322	17945	12134	23949	11284	19193	11996	16075	7852	23923
461	37517	33388	21635	54988	19574	35391	45309	71364	34531	36554	69646	70822	108699	16717	51725	25811	53684	28043	43004	27356	29659	20475	64346	71757	63292		20845	15015	12345	30324	9779	18510	15029	31758	21583	24479	27230	28624	43452	6567	18030	11620	22442	11518	18993	12583	15544	7989	24219
462	36070	31419	21277	54705	19693	36241	45076	71139	34955	35928	69648	70708	110681	17249	51870	26420	53574	27884	42891	28218	29575	20432	65727	71680	62412		20126	12484	12307	30125	10077	17734	15151	30775	21060	24146	26748	29114	44201	6347	17845	11903	24094	11609	19473	12911	15854	7878	24271
463	34191	33230	22597	54824	20042	35088	45289	71007	35100	36095	69578	72066	96623	16871	50955	26827	54222	27512	42953	27608	30346	21769	64814	72058	62836		20500	15195	12271	29943	9681	17824	14980	31023	20968	24746	26746	29265	43839	6509	17500	11884	24598	11034	19174	11982	15549	7975	24373
464	36755	33391	21378	55000	19166	35345	45825	70471	35327	45202	69497	70817	96943	16775	51897	26087	54343	28131	42653	27463	30332	20678	64641	73269	62600		20646	12361	12355	30357	9434	17949	15328	31432	21410	25090	26589	29269	43983	6557	17363	11922	22531	10898	19137	12173	15105	8137	24205
465	38123	26886	21381	55411	19450	36031	46190	70344	34864	45645	69699	71516	96753	17128	51037	26076	53713	27614	43708	27434	30592	18829	64045	75484	62166		20301	14941	12167	30439	9956	18119	15118	31066	21312	24821	26068	29052	43051	6464	17456	11108	22864	10987	18683	11859	15505	8204	24386
466	34666	27037	22250	54916	19838	35362	45843	71988	35286	42185	69489	71623	96423	16826	51766	26206	54599	27613	42919	27640	30412	20584	64142	76893	63244		21650	12393	12325	29814	9958	20683	15097	31156	21472	24671	25376	29054	43648	6227	17452	12210	23470	11146	18785	11020	15737	8377	24858
467	35993	27653	21408	54977	19603	41453	49161	71040	34995	44398	68331	70529	95504	17167	51063	26013	54762	27674	43140	27999	31310	20320	64433	60554	62566		22068	12900	12407	30015	9518	20988	15011	30831	21252	24819	25894	29121	44097	6277	17439	11622	25026	11102	18485	10854	15192	8193	24379
468	35616	31379	21709	55799	19173	42776	49479	71544	35178	35262	69287	71245	111881	16614	50798	25881	54571	27654	42687	27632	30584	20472	64744	61779	62101		22023	12127	12274	30172	9981	20735	14997	31206	21528	24871	25209	29057	43584	6058	17522	12143	26038	11581	18625	12787	15652	8058	24618
469	34247	31811	21467	55204	19500	41576	50317	70110	34332	35938	68367	70305	107029	17078	50317	26412	54637	27828	42339	27452	30407	20719	64106	61464	61671		21720	12459	12076	30063	9879	21017	14705	31016	20797	24598	25637	29065	43536	6389	17245	12046	25341	12008	18446	12077	15330	8536	24073
470	34161	31609	21905	54781	19861	41363	49192	70882	34670	44693	68313	70413	103643	16994	49398	24506	54624	27693	42859	27688	31242	20709	63691	61033	61628		22261	12205	12164	30282	9953	20629	15004	30802	20717	24778	27140	28821	44014	6145	17582	10435	25823	10997	18662	10747	15330	7731	24610
471	34262	32573	22163	54376	19513	40893	49196	70739	34915	45149	68482	70304	99270	16763	50252	25589	54752	27137	42223	27210	30607	20308	63770	75010	62788		21740	14852	12241	29857	10007	20599	14790	31260	20953	24864	26930	29374	42685	6710	17318	12453	25284	11643	18794	10522	15460	7873	24115
472	35186	31978	20983	55012	19396	41154	49111	69497	34253	45015	68675	70662	98391	16425	49792	26064	54181	27048	42583	27122	30960	20573	64344	73513	61851		21980	12838	12050	29949	9534	21148	15043	30724	20485	24768	26855	28525	41286	6604	17573	12079	25345	11111	18413	11134	15371	7511	24588
473	34367	32428	22765	54771	19567	41752	48570	70989	34591	35886	68863	70613	98457	16971	50408	25012	55405	26752	42261	27016	30434	20531	64268	72311	61179		21558	15162	11895	29805	10056	20549	15145	30920	21335	24314	26933	28694	39864	6372	17358	11300	24961	12295	17979	12394	15069	8115	24556
474	34123	32498	21080	55264	19704	34926	45409	71118	34472	35907	68324	71654	109720	16752	50619	26028	54807	27430	41306	26340	28062	19616	65235	72841	60964		21820	12174	12663	30159	10045	23960	14751	31092	21425	24400	26816	28818	38066	6124	17334	12150	25511	11288	18469	10973	15346	8357	24383
475	35195	31723	22074	54826	19321	35600	48782	70361	34875	35304	68745	70823	114406	16109	49483	26385	54740	27265	42100	27254	32963	20355	63996	71871	60968		21957	12104	11980	26401	9622	21158	15282	30725	21094	23941	26849	29022	37507	6714	17836	12102	25428	11170	18311	10596	15311	8071	23971
476	34624	31946	20626	54555	19299	35277	48252	70762	34593	36046	69010	70903	98701	16781	49933	25685	55525	26860	42591	27655	32551	21777	64179	70915	61273		21667	12206	11945	26572	9814	20930	14948	31141	21280	23811	26919	28816	36725	6475	17771	11953	25564	10762	18191	11255	15820	7838	24078
477	35340	32046	21501	53702	19452	35650	45470	71558	33901	41146	68192	70292	99630	16340	49141	26163	54618	27258	42069	27450	29649	19910	64567	71167	61583		21690	12214	12820	26881	10271	20613	15123	31710	21344	24136	26658	28622	36657	6324	17818	10452	25320	11461	18330	10804	15703	8460	24842
478	35370	32426	22689	54801	19466	34981	49006	71588	34820	42332	68628	70780	100246	16429	47960	26260	55054	27250	42681	26978	32540	21209	63777	71141	62071		21394	12278	12632	26444	10043	21181	15054	30751	21028	24218	27094	28556	38471	6188	17388	12155	24402	11285	17678	11326	15415	8157	24113
479	35901	32073	22436	54113	19613	35316	49383	70430	34796	41803	68352	70457	100311	16839	47905	25899	54557	26702	43038	28039	32787	19354	64786	72340	61883		21353	14610	12009	26817	10027	20690	15320	31232	20919	24310	27305	28656	41212	6526	17548	11932	24969	12067	18527	10537	15839	8017	24274
480	36362	31866	22041	54639	19802	35440	49169	71893	34947	43200	67309	70523	99953	17020	47924	26037	53848	27321	42061	27029	29833	19928	64205	72913	60376		21165	12122	12722	26582	10000	20839	14851	31193	21051	24255	26973	28502	44265	6238	17178	12214	24071	11943	18228	11552	15581	8452	23994
481	36527	32635	21873	54492	19755	35446	49269	70770	34494	42444	67949	70947	99828	16988	47542	25771	55110	26980	42843	27168	29146	20642	65344	73712	61540		21272	12211	11948	26234	9786	20410	15293	30428	21353	24269	27301	29261	43165	6162	17559	12178	24119	12587	19021	11469	15251	7874	23836
482	34752	32300	21862	53733	19113	34853	48729	70803	33948	43452	68198	69845	100184	16486	47351	26080	54014	27119	42816	26601	29498	19853	64182	74762	60557		18864	12259	12137	26599	10352	20502	15289	30403	21400	24144	26718	28827	43259	6246	17989	11568	23781	11088	18907	10886	15537	8487	23995
483	34285	32189	21254	54630	19860	35099	44751	70757	34521	43297	67500	69208	97761	16843	47208	25741	53934	27443	43006	27076	32035	20179	64584	75253	60730		18356	12370	12070	26487	10025	20567	14631	30271	21101	23849	26801	29030	43946	6165	17232	11911	23879	12001	19070	10787	15158	7874	23998
484	33789	32567	22878	55303	19117	34550	45060	70171	34715	43807	67042	69831	113395	16749	47241	26138	53542	27009	42834	28550	32381	20494	64110	75751	61325		20629	12002	12273	26468	10165	20972	14597	30735	21316	24309	26818	28589	43506	6269	17539	12072	23851	11716	19314	11932	15622	7904	24301
485	33648	32348	22258	54105	19325	34557	49630	69419	34383	41832	68174	70298	113508	16397	47088	24583	54131	27000	41801	28879	32204	20041	63682	74489	60002		19067	14869	12373	26501	9962	20810	14857	30241	20998	23870	26704	29221	43348	6504	18293	11468	24404	10962	18424	11909	15418	8364	24408
486	33779	32520	21038	53345	19603	34781	45089	69446	34324	45615	66383	70128	113762	16649	47593	26194	54001	26690	42704	28774	32083	19413	64584	72641	60140		18931	14595	11711	26665	10259	20778	14714	30538	20915	24415	26859	29339	43195	6008	17605	11612	23881	10633	18400	10749	15456	7502	24005
487	34504	32390	22320	54303	19471	34980	48396	68632	34672	45927	66185	70389	115533	17378	46457	25390	53503	27393	42543	29553	32030	20278	64793	72292	59596		20673	14540	12180	26406	10202	20565	14683	30424	21302	24082	26669	29144	43478	6544	17627	11341	24269	10582	17875	11705	15313	8131	24139
488	35158	32764	21255	53640	19501	34996	45201	67399	34541	42349	66284	69866	100420	16731	46938	25898	53708	26946	42776	29635	32303	20029	64126	71961	60026		21269	14462	12106	26395	10162	20444	15219	30794	20641	23969	26888	28714	43556	6536	17819	11652	24030	11194	17844	10683	15613	7706	24305
489	34499	32405	21361	53449	19124	34826	48598	67374	34427	44916	66426	70666	99973	16578	46553	25683	54333	29057	42311	28729	32369	20426	63868	72854	59714		20732	12082	12530	26296	10173	20708	14636	30461	21115	24197	26904	29073	43126	6691	17552	12432	23391	11050	17903	12573	14419	7711	24412
490	33832	32971	21787	54201	19548	35197	48955	67832	34247	36494	66812	70423	99599	16649	46378	26032	53509	26701	42010	27392	31559	20088	64118	71585	59785		21541	15085	11805	25869	9907	20062	15088	30986	20861	24043	26951	28768	42867	6503	17452	12288	23960	10980	18106	10559	15699	7457	24178
491	34152	32491	23095	53825	19514	34934	49526	68323	33933	45280	65524	69600	98727	16780	46459	25436	53228	26849	41689	26737	32099	20344	63264	71271	59589		21114	14304	11540	26463	10403	20063	14545	30449	20785	23741	26541	29189	43189	6146	17611	12001	23640	10795	18174	10413	15683	8128	23867
492	35110	32951	22999	54146	19721	35684	49470	67902	33695	36222	65579	70252	114939	16581	46991	25995	53707	26902	42419	26865	31978	20153	63878	72453	59441		21204	14985	12121	25876	10150	20218	14984	30425	20846	23885	26882	29097	43289	6225	17537	11781	23361	11751	17960	10666	15473	8349	24332
493	33046	32390	20657	53671	19169	35657	49969	67598	34143	45152	65105	70419	114289	16136	46373	25214	53452	26650	42642	26351	31685	20339	63355	71554	59435		20928	14204	11695	26172	10246	20770	14766	30719	20437	24324	27093	28990	43024	6270	17819	11804	23539	10839	18094	11466	15633	7555	24168
494	34042	32765	21366	52403	19492	35299	49625	67804	33762	44884	64868	69972	113693	16708	46389	25553	53964	27585	43169	26957	31242	20369	63757	71710	58917		18900	14729	12133	25515	10209	20633	15137	30620	21121	23653	26464	28749	43492	6592	17391	10638	22852	11134	17880	11369	15520	7982	24241
495	34840	32518	21981	53284	19511	33989	45425	67864	33813	41446	64603	70724	113047	16665	46474	25514	53460	28522	41819	27201	31646	20348	64357	70808	59174		18932	14229	11920	25769	10269	20380	14875	30780	20989	24134	26964	28913	43575	6317	17573	11191	22280	11522	18103	10720	15358	8169	23728
496	34558	33044	21888	52254	19082	34031	45771	69421	33781	45066	64582	69869	115548	16135	46298	25623	53764	26338	42827	25912	31164	20251	63060	71763	58980		19319	14226	11987	25552	10374	20367	15173	29787	20745	23479	26707	29024	43199	6384	16983	11247	22630	10777	17558	12235	15623	7792	23968
497	34647	33043	21314	51990	19814	35111	45578	69088	33951	44612	64545	71221	116082	16106	45702	25677	53795	26926	42382	27051	31309	20454	64690	70479	58831		19407	14454	11758	26215	10086	20863	14982	30633	20990	23850	26761	28773	44026	6330	17163	11115	22482	10615	17870	10746	15408	8534	23712
498	35062	28539	20990	52602	19227	34260	45632	69098	34561	45088	64252	70386	116284	16346	44913	25308	54668	26937	42553	27148	30760	20563	62997	72072	59218		19003	14679	12103	26153	10382	19980	14416	30425	20526	23596	27211	28432	43582	6439	17388	11432	22549	10864	17717	10985	15178	7869	24141
499	33282	28921	21081	52536	18911	35742	48800	69241	34339	45478	64663	69954	115122	16279	44247	25609	54928	26835	41819	27997	30415	20134	63653	71374	58712		19163	14375	11950	25803	10239	19929	15101	30428	20632	24026	26885	29273	44292	6141	17284	11979	21734	10626	18274	11838	15004	8422	23869
500	33136	28554	22148	53492	19571	34416	49369	69525	34510	43959	64322	71073	115250	15990	44876	25632	55010	26957	42418	26993	30939	20477	64075	72239	58853		19644	14261	12040	26044	10111	23307	14699	29803	20052	23400	26696	29174	43497	6278	17589	11471	22403	10998	18665	10468	15056	7557	23680
501	34530	29231	21327	52666	19162	34405	45368	68612	34016	44851	64907	70024	114613	16626	44528	25455	55531	26969	42788	27276	30348	20545	63899	71659	58487		19520	14554	12175	25627	10052	24179	14806	30363	20143	23139	26699	28602	43595	6603	17522	11683	23839	11068	18013	11588	15026	8102	24090
502	34942	29392	21936	53162	19301	33407	49697	69914	33327	44957	63942	69413	112585	16594	44074	25730	55715	26039	42329	27291	30095	20388	63353	71865	59015		19643	14183	11944	25523	10061	20235	14785	30119	20903	23554	27201	28497	43672	6268	17524	11854	23832	10749	18541	11535	14929	7401	23631
503	34858	30211	22822	52553	19022	34713	49552	68594	34263	44181	65122	69488	114836	15846	43523	25763	57774	26171	42419	27015	30706	20072	63910	71216	57793		19115	12237	12094	25947	10061	23234	14921	29938	20296	23729	26701	29137	43154	6426	17514	11457	24404	11129	17862	10475	14748	7790	24185
504	33918	31002	21098	51554	19881	34501	45533	68759	34480	45049	63227	70564	113970	17123	43671	25261	59304	26733	42080	26062	30835	20167	63082	71824	58603		19447	11856	11791	25638	9992	19989	14909	30174	20827	23729	22366	28879	43650	6407	17391	10469	21739	10582	17862	12460	15093	8263	23535
505	33640	31166	21083	51795	19400	33679	45645	68415	33793	45091	63557	69760	112894	16892	43426	25199	62037	26251	41431	25786	30524	20322	63251	72055	58516		19227	14317	11952	25748	9983	19947	14809	29972	20386	23343	26569	28761	43774	6328	17080	11007	24630	10632	18054	11859	15048	8132	24224
506	34572	31713	21870	51137	19804	36042	45101	68887	33724	44937	63966	69771	114692	16610	43318	26134	63702	26504	41486	27453	30229	20211	62899	71428	57913		19601	14506	11495	25743	10069	23350	14904	29817	20464	23287	22925	28814	43319	6521	17232	11738	25007	12032	18447	11651	15072	7335	23528
507	32782	26910	22804	52502	19724	33659	46104	68206	33487	35761	62909	69437	114828	16197	42771	25027	61932	26575	41706	27598	30314	20312	62773	71458	59102		20655	14260	11978	26021	10293	23407	14794	30242	20468	23357	27028	28355	43220	6236	16981	11093	24455	11386	17950	11502	14922	8018	23511
508	31548	28514	22433	52516	19567	35098	45479	68401	34210	35129	63966	69863	116172	16475	42213	25501	61011	28595	41716	27683	30308	20650	63365	71836	58440		20794	14271	11383	25746	10145	19458	14895	30556	20916	23634	27142	28493	43129	6749	17310	11598	24143	11551	18033	10471	15086	7600	23984
509	31573	28918	21649	53700	19049	34903	49622	69068	34277	44513	63382	70581	115713	16895	47586	25967	60678	26319	41532	26164	30629	19895	63150	71852	58424		20991	14625	12019	25985	10250	23483	14939	30520	20876	22704	26891	28324	43416	6795	17391	11652	24578	10771	17962	11209	15179	7965	23989
510	30407	29840	21095	53318	19552	34069	50732	68874	34122	44997	63322	69554	115836	16577	47104	24552	60645	26577	42097	26473	30011	19796	62502	71433	57940		20653	14009	11792	25603	9982	22948	16240	30072	21067	23266	26692	28858	43181	6417	16827	11732	24205	10939	18038	10565	14911	7952	23470
511	30656	29346	22259	53601	19159	33778	51633	67849	34299	44823	62553	70248	115897	16097	42794	26172	60586	25898	41034	27780	30111	20221	63334	71238	57798		20843	14522	10719	25568	9896	23052	14375	30413	20956	23390	22579	28447	43812	6396	17603	11805	24733	10899	18138	11301	15123	7073	23803
512	29590	29968	22539	52302	19831	35095	52643	69115	33869	44427	63876	70066	115887	16724	47205	25175	60363	26658	40864	27484	29846	19977	63647	70995	59078		20696	14350	12031	25860	10352	19467	14749	29773	20647	23120	27136	28775	43186	6201	17303	11094	24212	11784	17981	11405	14971	8221	24007
513	29904	29563	21897	53575	19086	34972	54648	70102	33729	44779	63132	70467	115976	16560	42024	25365	58877	26216	40851	26676	29652	20599	62480	70982	58524		18769	14526	11757	25656	10151	23199	14869	28108	20567	23249	27101	28877	43248	6323	17012	11894	24111	10796	17827	12118	15078	8249	23983
514	30507	30045	21643	51767	18784	35282	54362	68925	33733	45212	62807	70463	117583	16275	46900	25339	59391	26056	40196	27337	30119	20960	63781	71791	58960		18448	13951	10760	25072	10209	23162	14695	29768	20494	23536	23044	28444	43135	6629	17472	11369	24405	11046	17920	11690	15140	8395	23662
515	31094	30163	21736	52875	18807	34513	54950	69104	34309	44625	63360	70473	116484	16559	46580	25695	58180	26226	40903	27580	30000	20167	62846	71461	58443		18456	14407	10430	25415	10084	22209	14818	29866	20546	23276	22990	28203	42932	6235	17504	12038	24518	11733	18545	11554	14753	8154	23644
516	31084	30609	21772	51987	19389	36140	54519	68647	33696	44723	62573	71646	115339	16452	47056	25378	59505	26604	40788	27100	30359	20356	63896	71843	58680		20017	13947	11000	25839	10046	23087	15219	29666	20267	23468	22625	28558	43112	6496	17383	10805	24334	10818	17561	12135	14967	6928	23544
517	31416	30422	20844	51152	19096	35218	53874	69323	33604	44188	63328	74396	112943	16997	46800	25053	57976	26083	41545	27853	30496	20362	64118	71497	58710		20408	14309	11840	25697	10379	19481	14717	30308	20539	23571	22807	28693	43167	6342	17240	11443	24137	11197	17632	10479	14888	8247	23458
518	31296	26845	21283	51823	19342	34948	53193	68376	33841	45129	63215	75635	109109	17007	46160	25051	57544	26375	41526	27425	30080	20589	63705	71295	58625		18145	14224	10667	25327	10303	19541	14638	29571	20962	23660	22856	28433	43251	6796	16838	12135	23965	10990	18509	11193	14877	7398	23480
519	30036	28205	21693	51992	19532	35393	50849	69301	34304	44199	63596	79445	105579	17066	46858	23958	57508	25510	41351	27742	29475	19639	64800	70966	58716		17870	13892	11321	25287	9896	22856	14783	28444	20257	23299	22670	28430	42859	6472	17523	11756	23886	11021	18288	10490	14796	8443	23317
520	32446	29049	21836	51485	19658	35000	49241	69222	34359	43801	63172	83536	103912	16614	45756	25524	57587	26566	41018	27769	31506	20209	63902	71470	57977		18354	14086	10722	25418	9285	22562	15178	28458	20582	23376	26867	28668	42686	6345	17407	11103	24018	11648	17956	11343	15323	7815	23931
521	33853	32040	21477	50563	19297	34749	49362	69458	33721	44819	63318	92197	101592	16144	46417	24398	57090	26333	40704	27453	32043	20546	60850	70571	57560		18038	14498	10658	25551	10057	22080	14596	28897	20545	23408	26566	27873	43284	6374	17128	10489	23496	10559	17722	11692	14825	7781	23700
522	34853	32144	21803	49779	18997	33267	48878	69382	34012	43709	63257	94112	101250	15479	46979	24672	57206	26075	40534	27432	29471	20551	60601	71258	58064		17811	13973	10581	25471	9709	22545	14731	28246	20569	22991	22208	28263	42695	6304	17071	11842	23830	10889	17917	10861	15121	8260	23417
523	33572	29420	22268	49886	19361	33687	48590	67194	34308	43873	63452	94441	103700	16440	46205	24801	56590	26010	40376	27313	31665	20437	60610	70857	58666		18704	14111	11149	25549	10414	22702	15109	28783	20336	22966	26185	28570	42732	6405	17203	11451	24234	10983	17727	11804	15140	8396	23669
524	34258	30193	22036	49093	18993	34683	48506	67376	33237	44675	62644	94509	104141	16641	47194	25009	57218	25730	40524	26887	31265	20025	60665	70604	58800		18113	14420	10588	25232	9896	24414	14582	28987	19944	23553	25966	28633	43121	6446	17081	11908	24183	11542	18281	11559	15131	8414	23523
525	32677	28970	21167	49953	19296	34920	48404	67476	34057	44077	63324	92211	104707	16498	45500	24663	56591	28294	40651	26625	31308	20619	60288	69969	58422		17945	14168	10789	25326	9786	23897	16180	28865	20333	23983	26203	28460	43093	6313	17200	11281	23812	11334	17901	12133	14535	7327	23246
526	33186	29619	21810	49707	19699	35069	48806	68138	34236	44761	62907	100370	108137	16758	45524	25075	56255	26146	40173	27417	31234	20164	61133	70995	58245		17896	14574	10692	25548	9916	22130	14925	28759	20104	23165	25940	28461	43149	6351	17073	11562	24045	10752	17993	11968	14654	8229	23290
527	30475	29207	21241	49078	19132	34061	49033	67998	35030	43492	62677	101311	112558	16624	46052	25771	56377	26422	40160	26698	30978	20278	60973	71216	57500		17735	14233	10740	25555	9886	21595	14764	29108	20145	23191	25464	28722	43635	6300	17169	12059	23547	11092	18043	11241	14796	8180	23720
528	30931	30128	21800	50410	18636	34629	49513	67304	34310	43952	63090	100337	115561	16510	45958	25747	56359	26229	40218	27346	31350	20606	60025	70499	57757		19558	14133	10553	25449	9911	22019	16204	29087	19999	23443	25324	27953	44313	6523	17120	11621	23971	11061	18142	10968	14376	8174	23788
529	30447	32334	22881	50706	18890	33528	49227	67672	35742	44435	62794	98457	116673	16278	45632	24849	56202	25896	40723	26430	31782	19946	59691	70688	56652		17287	14063	10437	25488	10189	18332	14779	28957	20310	23188	25831	28714	43235	6348	17178	12165	23669	10956	18081	10907	14586	7670	23468
530	30791	32592	22498	51221	19854	33344	49212	68538	34881	44836	62864	97420	100998	16537	45421	24924	55465	25964	40025	27211	31304	20337	60156	70972	57894		18779	14135	10678	25233	10046	22220	14345	28673	20563	23400	25579	27911	43400	6305	17702	10588	23746	10898	17762	10666	14655	7406	23721
531	30974	32241	21616	52153	19113	41003	49280	68177	34779	45036	64147	95954	99566	15834	45873	23752	55497	25644	40390	27271	31520	20608	60109	71616	57992		18227	13741	10744	24922	10223	21865	14547	28759	20119	23440	25948	28271	44161	6233	17476	11521	24049	11695	17802	10902	14544	8201	23802
532	31378	32488	21790	51780	19438	41224	49178	67954	35464	44230	63776	94709	116367	15761	45075	24634	56205	26280	39210	26254	31118	19959	60198	71334	58109		18070	14168	10814	25288	9822	18767	14468	28214	20274	23198	26345	27952	43659	6324	17306	11626	23665	10988	18192	11667	14271	7402	23286
533	31697	25684	22438	51877	19822	40837	49523	68279	35002	44442	64212	94642	114661	16306	45842	25417	55958	28464	40223	26460	31521	20388	60303	71241	56793		19150	14455	11159	24896	9978	22412	14741	28702	20028	23257	26746	28265	43781	6469	17128	11241	23496	10947	18129	12029	14015	8251	23644
534	31820	26536	22301	52174	19487	40676	49686	69085	34624	44061	63024	94274	113393	15964	44935	23898	54960	25913	39796	25929	31644	19852	61333	70981	57429		19377	14146	10647	25487	10273	21871	14666	28050	20181	23086	26809	28078	44165	6284	17318	11732	23562	10918	17834	10594	13639	7517	23174
535	31204	26541	22429	52153	19656	33158	49500	68340	34488	44320	63831	99959	113120	15626	45027	25147	55617	26294	39775	27597	31693	20181	59578	71566	57383		19336	14300	10671	25419	9994	18676	15490	28508	19894	23491	26938	28313	44041	6693	17061	11488	23615	10502	17813	11200	13707	7596	23282
536	30285	26453	22612	51554	19159	34896	49617	68551	34498	44695	64330	93164	113199	15435	45308	24121	55632	26204	39376	27168	31438	20088	60504	70928	57446		20449	13863	10660	25369	10151	21745	14637	28437	19991	22916	22594	28377	43768	6386	16607	11604	23441	10607	18354	11562	14615	7568	23510
537	31016	26718	23000	52130	19190	35840	49646	68509	34735	43549	64027	93727	113004	15942	45345	24721	55193	25746	40118	26954	31270	19740	60823	70396	56521		19894	13864	11362	24898	9730	18583	15092	29075	20612	23560	22746	28169	43793	6217	16978	10353	23528	11289	18398	10671	14883	8441	23361
538	30180	26856	23206	52190	19167	35796	44142	69031	34190	44177	64329	83260	112209	16049	44829	24750	56281	26111	39865	26744	31772	19988	60510	70311	56334		20336	14186	11038	24818	9702	18855	15519	28744	20365	22851	22771	28581	43364	6342	17033	11659	23534	10826	17936	10665	14813	7986	23175
539	30656	26986	22888	52042	19539	33541	49191	69218	34778	44514	64356	85613	113295	16087	44644	24484	55411	26044	40280	27044	31849	19570	59848	70465	57533		19562	14123	10803	24315	9733	21844	13961	28720	19800	23205	22499	28365	43225	6496	16831	10676	23196	11040	18146	11368	14209	7780	23663
540	30898	27273	22868	51376	19307	32809	44299	67918	33936	45299	63975	84671	111652	16384	44877	24957	55555	25951	39503	26348	30661	19781	59622	70843	56451		19342	13790	10766	24520	10092	21776	14576	29110	19780	23206	22768	27876	43305	6681	16583	10523	23377	10844	17899	12299	14237	7378	22887
541	31052	27659	21936	51560	19637	39443	44401	68195	33709	41307	64039	93980	112631	16274	44865	25033	55583	25456	39183	26742	31890	19743	60772	71354	57281		21474	13925	10695	24191	9619	21873	14842	29284	19992	23804	26360	28061	43229	6127	17029	11770	22846	10750	17856	10383	14449	7785	23768
542	31335	27711	21468	50887	18880	39403	44855	68057	34184	44858	63710	94729	110629	16195	45095	24992	55834	25031	39955	27093	31125	20234	60511	70510	56205		22004	13939	10689	23908	9734	18590	15696	28897	19714	23614	22726	28739	42747	6212	17131	11664	23405	11642	17982	12031	14199	8248	22760
543	31171	27286	21455	51390	19201	38357	43654	67858	34087	44301	63413	94121	106134	16936	44638	25268	55449	25517	39725	26863	31257	19819	60798	70846	56896		21226	14162	10518	24367	9766	21897	15777	28956	19830	23798	23014	28169	42841	6407	16983	11491	23886	11000	17964	11483	14264	8114	23431
544	32055	28233	21870	50056	19283	39525	43992	68306	34458	44860	63424	93298	100524	15798	44360	24899	54681	25669	39278	26340	31273	19993	60854	70132	57115		20852	14238	10430	24124	9994	21861	14783	28746	20151	23108	23207	28217	42347	6430	16928	11647	23831	10567	17798	11277	14257	8181	23337
545	31956	30683	21740	49894	19571	38684	44665	68367	34236	45097	63568	93394	97126	16401	43736	25264	54993	26361	39587	26742	31853	19820	60183	70243	56589		19327	14197	10819	24096	9882	21865	14508	29095	19829	23907	23173	28509	42540	6119	17202	11554	23906	11580	18032	10573	14389	8210	23330
546	32026	30872	21923	49857	19308	39259	44460	68453	34115	44878	63646	92131	94861	16162	44491	25222	54858	25955	39378	26215	31758	19806	60621	70629	56521		18705	14060	10307	24403	10103	21537	16029	29646	19904	23785	23198	27936	41811	6272	17247	10746	23067	10905	18251	11973	14441	8270	23189
547	31950	30794	22815	51088	19771	39245	44386	68528	34069	44814	63762	92347	93949	15988	44485	24439	55405	25653	39586	25424	31269	20043	60689	70059	56647		18758	14024	10631	24132	9804	21706	15903	28865	20145	23512	22393	27718	39568	6411	17521	11509	23529	10964	17894	10877	14254	8306	22945
548	33071	31739	21182	51640	19318	39064	44607	68294	34364	45125	62895	92296	92169	16449	44326	23878	54986	25310	39820	25934	31694	20000	60344	70638	57304		18657	14103	11043	23200	9725	22241	15758	29708	20117	23238	22630	27469	39013	6530	17065	11788	23304	11526	17999	11055	14010	8320	23217
549	32994	31091	22535	51213	19546	38870	44000	68432	34714	44274	64046	92580	94675	16752	44767	24516	54469	25039	39122	26910	31491	19040	60842	70773	55640		20534	14167	10506	23558	9773	21561	14538	28775	19933	23808	23003	28150	38586	6525	16938	11550	23487	10725	18014	11461	14327	8124	23361
550	30568	31983	22965	52096	19665	39654	44058	68179	33782	44366	63404	82710	95654	15581	43939	25090	54541	25261	39242	25785	31698	20263	59949	69483	56014		20184	14178	10900	23518	10208	23851	14678	29478	19868	23909	23163	32169	38782	6448	17045	11323	23885	11622	18214	11643	14749	7542	23120
551	31616	30772	22465	50932	19366	39971	44174	69113	34082	35234	62841	82357	95893	16477	43553	24650	54918	24817	40280	26067	31471	19781	60460	70255	56574		20360	14134	10499	23561	9733	24261	14744	29737	20116	23990	23081	27835	39717	6078	17318	11563	23827	10875	17899	11450	14431	7751	22728
552	31889	31310	22719	51258	19557	39738	43676	68160	33723	44659	63243	81913	97011	16184	43686	25125	54612	25099	39440	26909	32072	19633	60523	69524	56161		20444	13852	10140	23357	9942	21527	14316	29910	20034	23671	23238	28292	40984	6291	17065	10633	23644	11757	18043	10964	14161	7691	23147
553	31178	30594	22632	51342	19355	38628	43673	68104	34300	44646	64018	81946	98831	16345	43276	25557	54311	25193	39794	25787	31863	19730	60393	69211	56301		19895	14175	10489	23114	10122	24333	14200	28747	19669	23705	23267	27620	42407	6433	17218	10242	23669	11524	17909	10810	14131	7881	22724
554	31950	31861	22781	50051	19270	38966	44522	67972	34554	44677	63985	81947	104293	16100	43437	25282	54684	25072	39742	26393	30896	19859	61469	69152	55339		17522	13945	10702	22807	9835	20816	15614	29352	19620	23610	23075	28340	41952	6286	16995	11658	23988	11661	17773	10868	14264	8046	23286
555	31730	31510	22594	52003	19457	40110	43962	68100	34655	44476	63589	81978	108077	15888	43690	25122	54227	24974	39894	25857	31417	19368	61463	69336	55568		17093	14364	10580	23124	9852	21525	14772	28859	19966	23068	23274	28082	41258	6478	17453	11504	23641	11291	17805	10658	14303	8095	23337
556	31950	31967	22492	51734	20326	39591	44713	68175	34353	45666	64202	81255	108810	16299	43368	25186	54124	27350	39691	25267	32036	19750	61321	69527	55532		17077	14201	10606	23122	9962	23568	16195	29330	20123	23130	23107	27958	40695	6187	16983	10724	24089	11091	18011	12019	14376	8283	23184
557	31528	27597	22730	51313	19745	39531	45154	68197	34470	44928	63859	82579	109275	15365	43646	23974	54273	24982	39422	25716	31841	19876	61147	69829	55882		19228	13968	10586	23055	10120	22837	14871	29668	19891	23839	23727	27299	39687	6533	17014	10111	23808	10810	17725	11680	13796	8119	23046
558	30678	28634	22392	51019	19127	38717	44502	67998	34723	43655	63931	81548	110334	16107	42798	24942	54440	25079	39859	25569	31009	19296	61127	69309	55578		18868	13755	10583	22518	9704	22967	14585	30148	19679	23291	23652	28229	39753	6124	17354	11272	23818	10722	17920	10964	14177	7536	22921
559	31792	29215	22968	50519	19903	40152	44374	67948	33879	43944	62928	81245	112414	16384	43027	25046	54152	25238	40053	25925	29146	19987	60740	70024	55555		18892	14176	10701	23226	10076	23312	14358	29017	19546	23804	22993	27941	39590	6369	17072	11588	23448	10633	17865	11241	13992	7675	22976
560	32108	29846	22877	51040	19075	39576	45075	68050	34069	41000	62816	81803	114139	15844	42930	24854	54704	27133	39101	25686	29161	19504	60981	69188	55746		20995	13944	10294	23216	10157	22782	14775	30056	19674	23457	23217	28286	39135	6450	17110	11346	23205	10892	18344	10548	14167	7899	23046
561	31730	30123	22496	51029	19481	39088	44520	67468	34465	35813	63361	81791	112730	16275	43233	25192	54911	25076	39555	26442	29189	19454	60556	69627	55379		20269	13959	10672	22876	9840	21004	14804	29431	19481	23803	23409	28035	41437	6266	17112	10988	23182	11521	17357	11428	14321	8464	22947
562	29615	29881	22830	51847	19566	39235	44455	68641	34948	44850	62445	81537	113586	15870	43098	24693	54282	25161	39729	25837	31175	19555	59666	69253	55832		17571	14341	10634	22811	9859	21219	15810	29217	19520	23528	24057	27573	41580	6292	17067	11521	23256	10684	17834	10565	14209	7958	23334
563	29807	25760	22229	50337	19654	38687	48248	67193	35070	44329	62589	81082	112424	15819	43098	23419	53729	24780	39475	25792	31585	19691	61064	69609	56032		19176	14095	10396	27563	9944	23699	14735	29355	19822	23231	23618	27838	41574	6515	17048	11193	23671	11157	17792	11277	14172	7599	22835
564	30378	26116	22824	50148	19080	39711	48691	67951	34638	44166	62143	82564	113094	15995	42522	24706	54212	24688	39382	26044	31746	19881	60151	69411	55179		19848	14094	10590	26923	9896	20752	14194	29588	19193	23547	23826	27626	41505	6339	16627	11425	23181	11161	17715	11600	13989	8110	23624
565	31296	25485	22234	50710	19448	39069	48365	67890	34531	44786	61794	82455	113808	15684	41817	25035	54399	24271	39174	25651	31241	19141	59854	69302	55147		20404	13904	10209	26563	10112	21092	15664	29694	20053	23566	23814	28630	42141	6226	16957	11587	23614	10657	18168	11965	14212	7770	22892
566	30607	29200	21999	50438	19404	39766	47917	67336	34731	35678	61546	82665	113982	15795	42412	24082	53569	25105	39722	25728	31377	19695	61118	69661	54905		20615	14186	10265	27571	10177	23564	15811	29856	19666	23479	23671	28076	42570	6799	17349	10701	23258	10553	18060	11888	14071	8134	23194
567	31460	28586	22813	49756	19051	39300	48567	67535	34813	44489	62244	82895	112758	15861	41298	24485	54490	24866	39239	25975	31572	19660	59633	68326	54579		17708	14071	10673	27262	9976	21116	16463	29386	19666	23442	23273	28331	42576	6346	16763	11563	22967	10708	17486	11224	14433	7344	23230
568	31421	29076	22722	50392	18750	39478	49641	69008	35028	35409	61912	82159	110815	15653	41433	25201	55507	24840	39111	27093	31713	19180	60810	69421	55332		18005	13839	10435	27725	9885	20935	15714	29810	19715	23432	23601	28340	41120	6451	16658	11336	22834	11825	17653	11625	14409	8117	23521
569	30758	29054	22404	50312	19318	39272	48647	67840	34507	44317	62958	79902	108504	15673	41879	25032	54710	24938	39807	26517	30816	19092	60218	69047	54756		17442	14023	10109	27213	9820	21148	14301	29886	19502	23482	23784	27605	41967	6403	16881	11338	23383	10659	17574	11698	14096	8206	22905
570	30772	29601	23045	50549	19498	38016	47826	68459	35192	44592	63091	89362	108078	15930	42743	23808	56008	24262	39633	25592	30764	19832	60537	69645	55663		18202	14149	10766	27507	9797	21464	15775	30117	19312	23429	24011	28125	41853	6547	16753	11298	23460	10706	17608	11125	14204	7879	22751
571	31039	29684	21534	49357	19426	37732	48514	67910	34767	35935	63692	90956	109385	15730	42692	24657	54917	25168	39939	25017	31380	19567	60662	69338	54028		17633	14138	10324	27107	10062	21175	14739	29610	19500	22869	23817	27309	41191	6193	17027	11591	23386	10302	17531	10601	14372	7541	22739
572	30478	29659	21339	49547	19609	37114	47332	67301	34933	35284	63360	95017	110986	15758	42301	25025	54820	24771	38716	26763	31011	19913	60255	68751	54829		17947	14127	10188	27510	9533	21461	15621	29717	19455	23732	23576	27835	41282	6101	16843	11329	23239	11591	17419	11942	14097	8429	22994
573	29610	28218	21803	50491	19255	35670	43574	68010	35156	45358	62894	95250	114962	15770	41848	24541	55102	25195	38555	26120	32088	19645	60013	69556	54738		17700	14077	10466	27619	9780	21233	14717	29790	19568	23674	24107	27546	41405	6366	16788	10828	23112	11700	17770	11650	14144	8072	23210
574	32826	27948	21548	49833	19463	43969	47520	67774	34310	45212	63236	95041	115980	15556	42003	24414	55569	24522	39348	26284	31224	19793	60690	69287	54858		17531	13477	10134	27163	10135	21510	16161	29862	19442	23115	24102	31593	41148	6349	16924	11419	23220	11392	17746	10419	14418	7646	22954
575	33141	32195	21936	49740	19502	36281	44218	67730	34064	34691	63061	85184	116521	15677	42225	24396	54987	25145	39385	26249	27062	19569	60556	68918	54500		17454	14307	10144	27313	9697	20655	15873	29632	18899	23556	23891	27829	41613	6315	16829	11164	22997	10795	17420	10704	14333	7893	22846
576	33906	32338	22646	49485	19861	37571	44967	67963	34668	41511	62740	96708	114285	15650	42157	23430	54989	24746	39022	25797	26844	19273	60409	69078	54580		17880	13985	10062	26805	9904	21068	15926	29644	19100	23377	24318	28258	41809	6197	16779	11218	23502	10578	17295	11919	14027	7701	22892
577	33964	31403	21549	49660	19791	39323	44336	67675	34545	40801	62992	96784	107076	15893	42445	24680	56002	24501	39019	26352	30998	19246	60342	69582	54481		17553	13768	9866	26584	9790	20502	14292	29614	19641	24060	24379	27995	41548	6481	17046	11061	23375	10945	17878	12182	14310	7543	22491
578	33059	32000	22896	49018	19169	38682	48663	67786	34552	35311	62849	97996	94414	15915	41875	22726	55977	25023	39297	25708	31518	19940	59082	69386	55216		18235	14144	10304	26803	10096	20697	15568	30225	19471	23282	24365	28389	42141	6640	16866	11498	23608	10769	17401	12233	14328	7546	22824
579	30520	29285	22197	48790	19812	39411	45318	67913	34281	35571	62008	99670	105313	15797	42583	24559	54875	24794	38891	25599	31661	19417	59086	69507	54051		17573	14053	10592	27303	9764	21175	15700	29412	19326	23646	24056	31926	42566	6319	16806	11214	23545	10667	17380	10609	14171	7824	22906
580	30236	29081	21907	48203	19134	39027	44603	68051	34268	35452	61450	88961	89658	15759	41331	23454	55688	24418	39577	26445	29957	19503	60910	68494	53703		18101	13829	10298	27006	9943	20233	14685	29625	19059	23683	24325	27405	41687	6252	16871	11503	23138	10636	17709	11814	13682	8219	22906
581	33140	27964	22010	49289	19770	38952	48445	68052	34912	35334	61969	87849	83322	15481	42317	23911	56267	24287	39287	26050	27210	19563	60566	68782	54493		17613	14064	10574	27165	10016	20616	14393	29962	19618	23414	23751	27721	39505	6308	16880	10585	23357	11010	17577	12343	14388	8154	22721
582	32368	31880	21836	49472	19412	38355	44123	68535	34941	35547	57310	87770	98876	15628	41945	23606	56240	24818	38795	26387	29835	19266	60067	68970	54525		17291	13741	10247	27169	9589	23113	14950	29359	19175	23688	22901	27976	39419	6091	16752	11035	23241	11638	17482	12131	14242	7703	23185
583	33308	31787	21910	49027	19395	39084	44066	68214	35150	44356	58771	88463	98872	15821	41864	24835	56504	26437	39320	25111	27255	19656	59792	69529	54522		17509	14323	10205	26538	9914	23206	14174	29680	19754	23363	22451	27707	37928	6312	16162	11320	23565	11061	17698	11554	13883	7670	22974
584	33205	27156	22739	49894	20077	39689	43876	67444	34687	41641	60475	87734	86403	16251	41964	22596	56331	26048	39448	26938	26855	18939	59379	68716	53675		17332	14091	10901	26701	9568	22328	16079	29749	19627	24101	22615	28183	37938	6183	18235	11046	22628	10648	17370	11957	14108	7861	22597
585	32437	26339	23105	50309	19413	38229	44485	66675	34316	34869	60540	94784	101293	15254	43159	25189	56029	24299	38823	26407	26614	18968	59540	69112	53283		17370	13878	10231	26763	9619	21798	14760	29676	19248	23357	26750	27999	36459	6277	18538	11476	22959	11608	17503	11726	14039	7701	23572
586	32589	31974	22666	50514	19408	38252	44219	68044	33935	43938	59369	83485	97959	15424	42811	23557	56886	24373	38862	26172	26602	20020	59714	69208	53452		19306	13667	10533	26199	10050	22458	15844	29457	19656	23995	24095	31465	36376	6325	18185	11120	23330	10940	17623	11459	14006	7220	22912
587	33364	32552	22993	49988	19520	38094	44984	67691	35033	41228	57968	84044	94297	15400	38617	24339	56607	24692	38805	26468	26811	19265	59563	69321	53499		19284	13871	10379	25740	9771	22146	14574	29705	19640	23893	24269	27661	36922	6261	18219	11540	22813	11224	17187	11692	14245	8208	22665
588	33944	32533	22366	50547	19392	38091	44712	67383	35315	34961	64751	83275	91015	15773	40218	24385	57187	26428	38546	26905	27060	19674	60206	68790	53804		19118	13976	10377	25969	9571	21558	14741	29468	19188	23509	24115	27840	37814	6192	18375	11016	23002	10853	17601	11849	13931	7081	22816
589	33259	27296	22675	49861	19648	37052	44055	68143	34539	43646	64149	83914	94881	16011	40149	23782	56963	24880	38934	25134	26678	19358	60161	69043	53874		19380	14176	10428	20988	9793	17651	14939	29059	18989	23896	24374	27522	40446	6168	18341	10872	23186	10976	17434	11847	13816	7761	22803
590	33791	27369	23010	50525	18964	36758	44296	67949	35025	41407	64194	83259	91339	16052	40918	24034	56663	26586	38859	27126	27107	19708	59024	68799	54032		19176	14425	10201	21139	10023	17482	14844	29780	19739	24012	24341	27359	41560	6481	17878	11168	23098	11479	17613	11993	13910	7845	22873
591	33588	31901	23001	49227	19629	36460	44591	67603	34856	43509	63369	83796	98210	15424	41324	25097	56117	24463	39417	25177	27338	19546	59813	69879	53493		19894	13919	10064	26251	9618	17164	14834	29619	19343	23907	24449	27947	41027	6050	17999	11182	22917	10873	17508	12051	13474	7694	22871
592	34124	29674	23238	49687	19837	37143	44009	67651	34941	44362	63087	83383	74994	15790	42150	24793	56688	24689	38748	25708	26425	19121	60281	69467	53727		19543	14270	10313	26029	9791	16829	15423	29396	19749	23426	24893	32433	41926	5988	18418	10951	23560	11529	17120	11626	13423	7713	22625
593	34457	30798	22307	49994	19341	38446	44862	67598	34102	34866	63950	84780	88838	15728	42422	24599	56491	26277	38816	26705	31055	19197	60177	69993	54886		19372	13676	10508	20316	9956	17054	15463	29687	19247	23714	24072	31942	40514	6099	18947	11195	23134	10756	17648	11315	13597	8006	22927
594	32598	30852	22459	49502	19467	38905	48579	67696	34350	35080	63708	83786	87415	14830	42696	24677	56228	24551	38797	25959	26853	19578	60449	69279	55558		19242	14137	10252	24377	9913	16453	15486	29533	19531	23329	24102	28825	41452	6305	16385	11116	24238	11360	17376	11030	13563	8532	22403
595	33077	33083	22983	49759	19500	38973	44681	66986	34463	34866	63199	83956	87762	15470	42009	24692	55462	25836	39515	26185	27312	19615	60470	69020	55499		19868	13880	10171	24730	10074	16091	15733	29758	19303	22875	24244	32827	41746	6428	16634	10753	24269	11577	17815	11437	14133	7855	22836
596	33001	29866	23020	49827	19100	38537	44617	66850	34705	34829	63319	85801	88382	15430	42220	24495	55709	26209	38364	25272	26878	19476	60231	68442	54902		19265	13867	10412	24693	10296	15825	16030	29437	19532	23201	24048	32435	41943	6435	16621	10895	24738	10578	17374	11308	13627	8418	22916
597	32549	29557	22104	49691	19390	38997	44309	67176	34434	41205	63356	85157	87340	15781	42750	22926	55595	24300	38920	26435	27016	19502	59274	68177	54777		19791	14335	10673	24503	9618	16150	16239	28901	19054	22936	24264	32786	42731	6331	16831	10829	24779	10427	16955	11596	13551	7598	22255
598	32053	28928	22795	50037	19294	38445	44746	67683	34741	44137	62935	84620	86996	15947	41102	24485	55827	26046	38863	25198	26982	19540	60008	68900	55324		19164	13985	10215	25166	9907	22167	15849	28681	18753	23589	23868	32979	42341	6274	15956	11109	24619	11135	17260	11473	13640	8094	22687
599	32735	28814	22535	48667	19170	38523	45060	67724	34385	41128	63564	84774	87387	15846	40678	24389	55941	26450	39177	26278	26831	19332	60355	69228	55490		18640	13805	10491	24656	9680	15591	15305	29717	19233	23417	24159	32413	42615	6224	16880	10953	24434	11399	16929	11514	13485	7496	22479
600	31731	30139	22429	49649	19220	38054	43835	67657	35231	35044	63498	84611	88356	15796	39954	24505	56418	24027	39001	26212	27140	19526	59416	69521	54753		19030	13659	10486	25052	10017	16105	16004	29275	19082	23506	24497	32855	42291	6153	16712	10858	24542	11566	17214	11333	13640	8049	22850
601	31923	28828	22303	49365	20170	39114	48271	67820	34810	41240	63668	85059	91856	15687	39640	24149	56856	26030	38849	26832	27046	19137	60153	68863	54638		20435	13779	10632	24689	9338	15521	15479	29666	18883	22868	24083	32027	42516	6484	16504	10672	24273	10916	16755	11451	13516	7834	22383
602	31997	32866	22708	49385	19496	37784	43969	68208	34860	34877	63230	84559	92749	15917	38585	24362	56502	25669	38098	26013	26962	18940	60701	68616	54825		20750	14217	10014	24810	9735	21800	15676	29578	18920	22648	24258	31859	42258	6618	16610	10794	24178	10795	17735	11215	13696	8029	22984
603	32326	32874	22258	49645	19295	38486	48514	66974	34103	41719	62883	85974	93466	15405	41458	24353	56061	24399	38164	25522	27376	19374	60264	69023	53973		19978	13855	10393	24736	9978	21958	15847	29577	19202	23686	24367	30884	41954	6457	16698	10165	24010	11772	17367	11165	13530	7589	22194
604	32254	32929	22790	49344	19731	38767	47783	67743	34361	41645	62295	87498	94958	15718	42065	24870	56474	24186	38749	25145	27127	18961	60596	68198	53367		17563	13855	10056	24863	9582	15296	15823	29508	19119	22717	24905	29863	42270	6550	16829	10147	23453	11501	17046	11544	13307	8111	22547
605	31990	33065	22688	48283	19488	38074	44404	66644	34413	43534	63063	90901	96252	15378	41756	24509	57175	24188	38847	25233	27415	19193	59652	68965	53560		17399	13592	10055	24633	9674	21574	15667	29842	18676	23728	24195	30780	41636	6328	16847	11102	23316	11383	17156	11224	13719	7597	22192
606	31998	32863	22690	49811	19717	39161	48846	66456	35148	44603	63228	94476	94371	15834	41717	24351	56550	23981	38224	26358	27286	19258	59188	68230	53414		17361	14113	10422	24410	9447	21676	15880	30125	19175	22903	24336	32072	42068	6081	17147	11032	23526	11417	17508	10930	13541	7472	21873
607	32227	33377	23040	49708	19455	38783	44234	66962	34865	44152	62736	98065	93770	15948	42284	24340	56312	23949	38275	26135	27167	19383	60138	68110	53565		19154	14286	10352	24421	9722	22060	15549	29760	19306	22359	24815	31741	41805	6595	16831	10981	23345	10575	17013	10802	13782	7631	22802
608	31362	32510	23053	48456	19438	38026	48224	66263	34874	44627	63027	98773	93458	15203	41535	24142	56176	24139	38134	26478	30088	19180	59737	68696	54133		19206	13920	10178	23936	10355	21679	15676	29503	18921	22867	24721	31538	41980	6292	16869	10603	23468	10432	17069	11155	13315	7738	22547
609	31842	33213	22361	49300	19571	38107	44018	67962	34606	45697	62490	97161	93232	15531	41354	24995	55350	25228	38580	25854	30897	19506	60465	68761	53966		19158	13833	10296	24512	9670	22174	15545	29699	18958	22519	24271	31810	42993	6183	16553	10278	23443	10784	17285	11021	13516	7524	22488
610	32366	33424	22967	50363	19392	38537	45240	67788	34875	44490	62777	96214	93140	15867	42043	24167	55669	26199	38140	25774	30679	19577	60182	68417	53980		18887	13709	10199	23964	9614	21549	15630	30030	19080	23144	24650	31719	42317	6114	17090	11147	23686	10761	17276	10939	13717	7798	22222
611	31817	32573	23004	49922	19343	39142	48551	67779	34610	44410	62872	95557	95188	15395	41928	24380	56239	23920	38045	26370	30377	19487	60448	69508	53894		19450	13974	10544	26350	9531	15722	15483	29608	19506	23288	24464	31619	42382	6339	16336	10606	21687	11009	17329	11024	13568	7677	22510
612	31113	32427	23577	50026	19702	38713	47868	68085	34831	44050	62199	95590	93694	15843	41888	23713	55165	23968	38097	25416	30871	19420	60210	69362	54633		18781	14192	10414	24415	9956	15515	15659	28971	19386	23159	24728	27666	41777	6253	16994	10964	21947	10608	17307	10898	13681	7712	22290
613	31809	32596	22594	48011	18799	38350	44029	68170	34710	36208	62754	96077	92906	15314	41300	24169	55593	23797	38715	26280	30029	19711	60055	69240	54372		20265	13754	10215	24121	9428	15761	15527	30010	19422	23227	24587	27465	42395	6405	16375	11093	26174	11258	17290	11117	13630	7838	22483
614	31997	28394	22799	48767	18999	37411	44173	67386	34746	34752	62074	95164	91407	15338	41282	24267	55575	24057	38649	25259	30794	19614	60048	68446	53725		20904	13775	10328	24037	9857	21338	16098	29595	19875	23099	24198	27309	42035	6469	16974	10686	21938	11521	17271	11098	13378	7836	21858
615	31784	28309	23257	48743	18971	37336	48473	67663	34745	43265	62588	94537	92010	15187	41791	24547	55472	25385	38902	25943	27939	18288	60372	69446	54202		19204	13599	10009	24924	9575	22239	16054	30012	18939	23321	24910	27169	42102	6157	16644	10866	26144	10928	16784	10671	14048	7791	22478
616	31290	28871	23193	48944	19237	38076	44715	67918	34370	40635	61670	93961	95660	15198	40928	24298	55393	24050	39067	25413	27482	19225	59724	68728	53414		19170	14042	10389	24225	9612	21735	16082	29691	18456	23661	24794	27272	41932	6295	16785	10823	26380	10592	16835	11161	13636	7991	22200
617	31382	28950	23035	48963	19388	38035	44534	67919	34892	43775	61734	93521	100403	15509	41067	23693	54874	23884	38490	26400	27800	19074	59772	69282	53855		19889	13948	10591	23626	9614	21763	15867	29817	18941	23569	24703	31716	42414	6246	16786	10837	21788	10571	17082	10979	13458	7392	21991
618	31451	29102	22710	48949	19288	37760	47569	66893	34892	43658	61641	92468	107242	15639	41223	24642	55303	23929	38648	26017	27198	19487	59864	68274	53902		19760	13997	10550	23343	9622	15189	15862	29997	18578	23656	24904	27999	41807	6479	16370	10741	25965	10766	16967	10822	13589	7998	21840
619	31074	29698	23135	48644	19456	38202	47586	67319	34979	44016	62042	93269	108283	15303	41921	24082	54592	23668	38072	26038	27441	19086	59938	69509	53659		19533	13773	10146	22950	10034	21913	15999	29297	18866	23473	24649	27961	40237	6508	16208	10971	21573	11548	16839	11029	14266	6928	21724
620	29368	30011	22905	49227	19302	37952	47218	66865	34287	43751	61612	92619	105758	15483	41358	23877	55094	25860	38820	25292	27640	18161	61180	68315	53654		20370	13657	10432	22721	9874	21718	15702	30418	19652	22880	24591	27071	40088	6418	16659	11322	21652	11082	16898	10883	13895	7282	21920
621	30717	30065	23002	49307	19500	37998	44370	66051	34518	42943	62229	92636	108083	15241	40794	24205	54232	25496	38985	26008	27067	17957	59682	69091	53990		19438	13662	10817	23106	9290	21547	15668	29837	19041	23519	24882	27772	40116	6369	16572	10773	25880	11027	16754	11030	13716	8031	22209
622	31678	30439	23375	49647	19344	38767	48386	67411	34651	43621	61616	92608	108026	15683	39148	22657	54552	23968	37666	25912	27689	18720	59500	68901	53676		18642	14110	10084	22847	9630	21635	15901	29964	18787	23562	24591	28076	39280	6035	16393	11043	21657	11406	17112	11059	13331	7598	21648
623	31460	31760	23217	49429	19695	37927	44067	66560	35129	43937	61611	92099	109418	15024	38838	23348	54609	23569	38351	26148	28162	18944	59532	69153	52882		18471	13809	10204	23032	9625	21969	15658	26854	19097	23185	24609	27113	38889	6570	16867	10586	21435	11374	17243	11234	13520	7886	21979
624	31130	31139	22469	49238	19095	38036	44458	67019	35304	43396	60755	91780	96726	15888	41241	24606	54625	24010	38437	26279	27518	18033	59538	69019	52964		15692	13920	10308	22697	9715	21043	15612	29764	19008	23401	25035	27456	37828	6293	16902	10864	25145	10866	17405	11059	13643	7904	21322
625	33002	32011	22286	49316	18972	37841	44213	67541	34925	42529	61822	90802	95750	15179	41293	24341	54021	24096	38944	26107	28084	17781	59243	69222	53617		15928	13587	10838	22621	9282	21179	15630	29983	18742	23204	24510	27346	36326	6512	17035	10922	26049	11402	16887	11027	13514	7893	22298
626	33381	32197	22456	48737	19237	37256	44659	66380	34441	43892	61290	91115	95217	15499	41602	24274	54217	23687	38203	25423	27946	17805	60087	68162	52885		16322	14092	10292	22811	9194	21796	15439	29297	18943	19744	24532	27980	36013	6531	16425	11238	26007	10537	17013	11309	13290	8010	22195
627	33469	32150	22363	49415	19430	38261	44292	66826	34616	43893	61110	91131	95929	15444	40594	24095	53564	23748	39014	25011	27965	19268	59608	69091	52388		18526	13718	10374	22856	9319	21282	15526	29558	18754	23521	24460	27364	36382	6125	17180	9966	25405	10618	16770	10899	13453	8172	21639
628	33935	26462	22536	48776	19455	37557	44076	66044	35410	42953	60435	90362	95733	15431	41463	24169	53617	23544	38496	25061	28022	18912	60256	68803	52864		18689	13702	10395	22912	9411	21222	15767	27000	19281	23669	24957	27591	37461	6361	16515	10127	25911	11492	16907	10846	13459	7882	22041
629	32879	28178	22477	49209	19150	36798	44051	67073	35239	42802	61063	90198	96372	15224	41842	24051	54345	23558	37601	25189	27920	18013	59049	68045	52822		18777	13777	10718	23190	9611	21605	15683	29596	19289	22905	24793	31820	39773	6177	16861	10162	25212	10605	17007	10897	13519	7744	22295
630	31560	31638	22325	49251	19493	36948	44120	66770	36078	43060	60906	98536	96466	15478	41360	24809	54116	25362	38352	25320	28255	19021	58885	68143	52462		18968	14201	10783	22511	9238	21838	15375	29832	18808	23542	25397	27375	40136	6246	16983	10764	25323	10406	16796	10833	13528	7546	21847
631	31520	31873	21888	48602	19492	38207	43934	66174	34585	42974	60554	91075	95765	16169	41236	24183	54006	25575	38327	24796	27737	17897	59738	68981	53059		19577	13453	10352	22687	9692	21318	15286	29033	18884	23238	25173	27848	40855	6192	17222	10494	25158	10524	17000	10947	13358	7879	22370
632	31628	27744	23239	48867	20013	37196	43982	67705	35152	43474	60097	90184	96860	15844	38871	24660	53676	23841	38089	25166	27922	18172	59980	69124	52259		18523	13513	10412	23058	9476	21498	15507	29790	18923	22885	24554	27956	39987	6351	16661	10672	25350	10810	17278	11081	13258	7110	22326
633	31563	28280	23199	49239	19179	37163	43941	67095	35344	42927	60589	98455	96675	16236	38963	24111	53460	23767	38406	24614	27836	18142	60241	68966	51959		20595	13928	10479	22670	9526	21075	15305	29971	18696	22980	24869	31129	40133	6363	16851	10401	24944	11192	16904	10977	13250	7709	21865
634	30698	27407	22913	49134	19910	37839	44273	66386	35765	42773	60310	90124	96549	15886	38833	23175	53815	23291	38509	24865	27442	17754	59825	68719	51916		17583	13855	10485	25899	9737	21540	15960	29377	18900	23121	25114	27491	38839	5992	16953	10666	25359	10568	17128	10983	13398	7534	22312
635	30919	27892	22979	48394	18933	37158	44844	65877	35774	42753	59765	90487	107454	15705	39146	24188	54017	23782	38164	26051	27972	18441	59480	68349	52685		17692	13648	10439	24763	9229	17199	15298	29073	18686	22753	24504	27964	39018	5944	17058	10723	24993	10706	17143	11218	13247	7873	21866
636	30896	32048	23189	48420	19560	36983	44169	65326	35539	43070	60350	91450	82392	16270	39445	24396	54746	23654	38299	26106	27554	17691	60116	69690	52338		19747	13695	10444	25800	9542	16767	15589	29385	18716	23014	24665	27224	39341	6007	16859	11103	25288	10778	16793	11187	13276	8014	21991
637	31932	31979	23000	48279	18957	37182	43756	64901	34649	41675	59433	89912	83378	16122	38848	22461	54661	25573	37915	25538	28177	18247	59607	68849	52436		19162	13685	10527	25335	9361	16844	15777	27440	18620	22682	24863	27840	39468	6304	16910	9840	25834	11447	16478	11009	13471	7913	21797
638	32358	30398	22785	47836	20183	36005	44124	64408	35956	42849	59284	90463	83777	16339	39379	24588	55970	23737	37395	25953	28015	17602	60055	69212	52351		18537	13924	10582	25081	9684	16633	15472	29958	18788	22804	24572	27597	41339	6251	17112	10758	25725	10707	16425	11014	13639	7968	21578
639	31044	26932	23024	47722	19293	36272	43580	66406	35370	42811	60306	90384	82992	15845	39724	23705	56270	24840	37903	25995	28042	17801	59642	69223	52697		18994	13653	10428	25212	9388	16705	15602	29031	18941	23454	25026	27602	41971	6457	17015	10542	26764	10681	16733	11410	13069	7735	21665
640	31724	26568	23149	47873	19088	37228	44296	66253	35188	43169	59385	90787	84087	15036	38400	24599	57471	23251	37786	25182	27844	18092	60313	68877	52444		18636	13555	10269	25623	9607	16904	15498	29590	18718	22980	24602	27903	41158	6475	16766	10415	26423	10623	16716	11203	13403	8071	21990
641	32250	32081	23083	48437	19463	35543	44118	66056	34930	43215	59685	90270	83220	15614	38922	24489	57279	24058	38449	25554	28066	17707	59919	68990	52341		18480	13699	10650	25254	9462	16805	15617	29260	18649	23256	24832	28143	41145	6454	16385	10456	26446	10701	16596	10739	13613	8141	22075
642	31373	31780	23321	47860	19239	36312	43977	66636	34359	42503	60379	90271	83253	15254	38974	24380	57080	23909	38287	25782	28500	18084	60642	69446	52565		20016	13459	10177	25955	9470	16802	15704	27559	19027	22379	24540	27186	41498	6501	16657	10950	26448	10823	16696	10865	13425	7893	22056
643	32001	31131	23106	48362	19516	37349	43769	66273	35463	42937	59819	97330	84013	15405	39249	23593	56498	23929	37945	26105	27856	18908	59386	68862	52278		19454	14107	10353	25603	9418	16870	15775	29385	18636	22332	25180	27977	41272	6806	17266	9791	26388	10805	16837	10908	13223	7682	21740
644	32408	25932	22744	48174	19439	37087	44174	66228	34588	42815	59904	91006	83056	15600	39164	23877	57700	24112	38440	26514	28437	18601	59962	68075	52136		16706	13977	10506	25998	9850	16649	15528	27612	18970	22629	24190	27562	41848	6163	16336	10470	25935	11115	17155	11207	13171	7887	22082
645	33183	29451	23409	47080	19541	37462	44220	66759	34838	41898	60048	89349	84702	15574	39235	23839	56980	23413	37526	24626	28440	17970	59758	67381	52546		17513	13823	10340	25365	9469	17007	16027	27762	18843	22485	24411	27156	41618	6301	16719	10512	26237	10768	16732	10784	13250	7031	21837
646	33903	29119	22852	46537	19428	37079	43870	66164	35742	43021	60312	89426	83313	15468	39271	23678	57081	23881	38482	25409	28017	17719	60070	68781	52226		18686	13913	10473	25926	9460	16814	15655	27596	18845	19090	24050	27697	41798	6442	16838	11144	25707	11780	16793	10997	13351	8048	21981
647	33363	27594	23275	46683	19439	37472	44683	64772	34961	42580	60535	88921	83613	14721	38753	24308	56523	23307	38474	25488	28514	17953	59818	68878	51382		19527	14341	10625	24953	9625	16743	15863	27414	18701	22599	23902	27710	42527	6358	16527	11144	25639	11399	16870	10759	13541	7845	21686
648	35105	27257	22911	45295	18996	37306	44000	65001	34442	42429	59800	89260	82275	14776	39658	24097	55574	24247	38078	25727	28020	17872	60135	68075	51805		19330	13827	11044	25333	9513	16987	15756	27815	18949	22353	23604	27746	42452	6575	16671	11175	25807	10702	16464	10951	13301	8128	21827
649	35026	31179	22324	45622	19589	38119	44075	66091	35044	43086	61201	97456	82048	14714	39336	24174	55724	23415	38135	26567	28434	18972	59397	67492	51475		19241	13820	10428	25271	9217	16720	15676	29133	18905	19043	22940	27595	42126	6586	16824	10725	25798	10740	16399	10907	13585	7750	21541
650	35874	30439	22476	46059	19362	37553	44062	66329	35104	42700	61139	89597	83007	15450	39648	24283	55824	23474	38059	25617	28198	17692	60523	65908	51598		19002	13863	10657	25550	9206	17512	15534	27982	18612	22488	24264	27561	42149	6154	17170	11447	25736	10665	16953	10994	13139	7895	21937
651	34162	30042	23189	45991	19151	37779	43907	65360	35354	42502	61985	89737	83628	15257	39423	24064	55710	23680	38359	25295	28774	17852	60364	65880	52117		18013	14204	10592	25565	9157	18196	15938	29539	19219	22800	24596	27182	42153	6573	16687	10892	25757	10508	17256	11203	13154	7708	21551
652	34425	30152	22895	46307	19030	53395	44057	66536	36388	42644	60725	89780	83745	15773	40046	24170	59115	23483	37524	25592	28850	17567	59830	66492	51987		18297	14418	10592	25730	9437	18942	15733	28476	19093	23318	24661	27953	42359	6410	16299	11268	26171	10767	17074	11304	13297	7537	21723
653	34431	29180	22603	46459	19741	39645	44134	66517	35678	42418	61016	89799	85212	15190	39491	23797	59091	23790	38470	25798	28259	18058	60534	66677	51829		18714	15032	10188	25685	9757	19510	15669	28680	19009	23087	25097	27993	42777	6483	16761	11603	26584	11307	17170	11116	13164	8240	21977
654	34545	29210	23128	47508	19158	55552	43958	66989	35771	43281	61141	89705	85445	14865	39730	23745	59916	25530	39347	26483	28306	17965	60132	66525	53159		19339	15707	10552	25867	9212	21463	15257	29126	19020	23016	25105	27753	42718	6326	17264	11728	26160	11002	17003	11566	13541	7777	22888
655	37005	29086	23084	47622	19207	42727	43868	67740	36442	43045	61029	89605	85767	15222	39809	24589	61852	23855	38060	26246	28674	18146	59904	66717	52780		19016	16133	10637	26095	9594	22507	15768	33398	19374	22942	25396	27507	43135	6479	16791	11793	26258	10260	16896	11172	13632	8181	22451
656	35818	28093	23599	48532	18828	44396	44316	67246	36430	43024	61038	89151	85737	15268	40325	24525	62266	24233	38507	26482	27977	19038	60987	66254	52977		20093	16326	11052	26259	9363	24340	15939	37183	19553	23097	25500	27897	42990	6813	16826	10627	27283	11497	16962	11185	13154	8025	22686
657	37600	28138	23126	49256	19140	45581	44351	68071	33551	43012	61159	89497	86774	14611	39821	24770	64220	25830	38310	25736	28689	17909	61352	65950	52992		21452	16565	10695	25759	9525	25126	15695	37239	19496	22826	25879	27593	43558	6599	17085	12028	27941	11327	17319	11375	13529	8231	23300
658	34109	28194	23272	47748	19550	45750	43479	68095	35697	43071	61341	88840	88182	15107	40289	23880	68709	25717	38083	27233	28434	17491	60956	66732	53339		21481	17232	11032	26433	9667	26625	15987	38124	19325	19422	26564	28073	44578	6342	17215	12588	25128	11684	16861	11526	13261	8005	23166
659	33552	32997	23456	48310	19565	60641	43680	68777	36119	41000	61082	90196	90662	15307	39788	24597	66685	24080	37672	26853	28250	17791	60782	65719	53229		21905	16851	10857	26317	9423	26676	15400	39086	19526	23633	26699	27894	45919	6279	16942	11032	26108	11718	16825	11705	13472	8130	23566
660	33110	32885	23046	48183	19140	46325	44049	69369	36676	41665	61485	90240	92523	14753	39801	24721	66681	24090	38716	27105	28758	17525	60944	66060	53169		21952	16764	10777	25885	9632	27057	15789	41827	19784	19221	27354	28132	46848	6462	16974	12213	26183	10836	17245	11488	13604	8097	23824
661	33803	33755	22850	48760	19233	62583	43900	69009	36230	43666	60983	99274	92851	15440	40128	24459	66789	24259	37716	26000	28768	17848	61351	65578	52804		19842	17375	11102	26656	9397	26914	16222	39458	19603	20061	27651	27929	48970	6434	16892	12148	26986	11490	16921	11921	13472	7961	23702
662	34202	33123	23134	48941	19006	62492	44394	68945	35009	43087	61105	100282	93157	15166	39562	24266	66273	24494	38179	27584	28988	18159	61943	65372	53630		20518	17855	10667	26239	9439	26543	15901	38653	20182	19425	28259	28097	50333	6806	17129	12179	26777	11039	16967	12110	13200	7986	23729
663	34233	32747	22324	47810	19453	63423	43506	69460	36007	43283	60790	93285	86616	15130	40426	24783	65549	23986	38133	27460	29256	18212	61180	64950	52291		20187	17702	10942	26472	9453	25764	15974	38782	19642	20022	28979	28009	50999	6392	17523	12455	26551	10952	18232	11608	12978	8049	23344
664	34642	33649	22664	47755	19542	62315	44131	68172	35499	43831	60128	104280	86997	14950	40566	24842	65643	23796	37444	27241	29262	17961	60904	65230	52654		20763	17857	10887	26570	9069	25636	16033	39099	19523	19643	29646	28174	51998	6436	16927	12782	27214	10865	16701	11764	13444	7949	23565
665	34584	33532	23371	48572	19032	62825	43551	68572	35634	43612	61223	110040	87401	15085	40709	24900	65500	26108	38206	27225	29032	18148	60514	65438	52371		20887	18005	10705	26725	9732	25266	15761	39560	19456	24008	30970	27518	51814	6474	16903	12138	26904	11027	16894	11861	13761	7923	23862
666	34373	33270	23764	49042	19564	62362	44535	69100	35437	43572	60418	105658	117459	15255	40200	25027	64708	25077	37841	27786	29721	18330	61297	65214	52232		21280	17963	11133	26918	9468	24811	15508	39669	20240	24580	31853	28052	53484	6676	17061	12462	27141	10820	17431	11862	13403	8019	23887
667	35175	33361	23383	48933	19588	62771	44514	68994	35477	43709	61368	106748	111303	15296	41107	24968	64738	24061	37401	26715	29318	18280	60581	65182	51328		21435	17737	10915	26992	9421	25286	15848	39929	19642	25123	31985	28669	55297	6457	16977	12667	31418	11351	17092	12188	13297	7777	23690
668	34701	33660	23377	48529	18681	58640	47468	69427	35615	43328	61816	116544	111216	15389	41005	25517	64688	23745	38262	26975	29684	17539	61646	65346	51583		21319	18369	11043	27085	9424	25476	15596	39769	20017	25048	31606	28288	57286	6648	17296	13112	32250	10718	17083	11780	13301	7315	24753
669	34892	33570	22959	49122	19076	62030	43632	69045	35992	43471	60461	117253	111958	15050	40333	25049	63980	23884	37564	26942	29858	18200	61841	64503	52205		21480	18561	11103	26847	9381	25313	15799	39667	19532	24925	32876	28610	57626	6678	17514	12973	30986	11779	17355	12134	13477	8153	23931
670	35255	33319	23464	49543	18819	63018	43684	69529	35633	43129	63001	105550	114593	15025	40404	25596	64694	23931	38415	27559	29944	18118	63247	64955	52284		21205	18519	11385	26901	9535	24606	15910	40075	19812	25551	34688	27883	57612	6444	17160	12904	31225	10928	16932	12267	13391	8385	24178
671	35062	33705	23314	49167	19043	63195	44521	69410	36210	43716	61582	114734	113774	15418	40061	25411	64749	26290	37984	27963	29612	18325	64410	65565	52134		21015	18561	10888	26829	9405	34027	16092	40108	20148	25522	35601	28363	57695	6536	17311	13468	26856	11951	18137	12517	13197	8088	23773
672	35833	33948	23313	48902	18491	62165	43879	69976	36025	43467	61691	114445	112734	15632	40691	24938	63893	24043	37729	28520	29942	18078	66064	65608	51538		21577	18618	10841	29319	9571	24659	15611	39849	20244	25538	35678	28511	57103	6495	16991	13757	26887	11821	17346	11977	13882	8094	24519
673	32173	34135	23429	49412	18877	62986	43842	69433	36055	43461	61437	114805	102025	15978	40538	25271	63812	24680	38276	26622	29655	18248	68245	65507	52731		19197	18793	10861	29488	9386	25430	15886	40243	19835	25529	35007	28386	57309	6562	17158	13804	27719	11034	17377	12314	13680	8109	23914
674	32820	34232	22967	49368	19223	63085	43515	69636	35976	42950	61917	113402	100705	16086	40681	25861	64423	25955	37877	28737	29742	18687	69018	64933	52026		19560	18481	11252	29986	9379	34596	15898	40349	19879	20636	35311	28644	57074	6603	17421	13723	28343	10932	17331	12673	13187	8243	24631
675	32910	34373	23530	49805	19057	64065	43739	69659	35503	43215	61860	113800	99199	16287	41019	26011	63542	23972	37439	27669	29756	17954	68843	65431	52081		19571	18869	10990	30113	9674	25414	15392	39921	20222	21248	35621	28881	57070	6870	17422	14042	29257	12227	16619	12822	13416	8038	24349
676	34197	33678	23588	49011	19115	64104	44188	69066	36211	42652	61987	112901	100523	16247	40863	25697	63944	23764	38489	29078	29757	18025	68357	65036	52513		19862	18173	11298	30770	9558	33877	15898	40134	20565	25288	35038	28265	57838	6547	17206	14275	29654	11794	17111	12920	13640	8278	24748
677	33778	34889	22893	49607	19196	64007	44160	69577	36087	42825	62805	103104	102044	16292	40936	26477	63629	23737	37641	28851	30028	17755	68833	65683	52348		20116	18249	11169	30030	9638	24558	15925	40355	20146	21761	35176	28649	57026	6823	17260	14908	28698	11763	16916	12564	13472	8083	25304
678	34121	34568	23021	48229	19288	63916	44452	70857	35521	44311	61347	101635	105969	16244	40956	26645	63485	25810	38031	28701	29737	18011	69556	65061	52720		21713	18357	11349	29923	9487	25192	16168	39916	20387	22141	35290	28465	57466	6667	17314	16084	29815	11915	18316	13058	13439	8295	24724
679	33370	34102	22955	48078	19227	64173	43619	70401	36409	42967	62384	102135	109647	16130	41231	26661	63492	25970	38136	27578	29397	18537	68798	65334	53592		21896	18414	10902	25680	9253	25224	15757	40471	20183	22654	34708	29012	57318	6884	17849	16422	29955	10983	17164	12832	13363	7803	24910
680	32572	33927	23066	47896	18979	63897	43769	69466	36265	43524	62079	105174	106752	16160	37063	26520	63902	24388	38089	28611	30240	18450	69426	64975	52827		21877	18419	11275	25768	9421	33881	16074	40030	20364	23760	34767	28482	56766	6607	17417	16569	29493	11697	17363	13288	13271	8067	24748
681	33837	34573	23590	46730	19104	63446	44227	70821	35236	42675	62448	118303	104511	15746	41522	26292	64344	24254	38741	28592	30071	18332	70489	66000	53676		21931	18484	11098	26153	9576	24908	15780	41080	20220	25080	34374	29065	56300	6738	17737	16627	29539	11685	16720	13566	13251	7985	24721
682	34061	34270	22996	47383	19080	64052	43392	71224	36189	43262	61243	119242	101209	16324	37565	26598	64869	24454	38227	27723	30139	18138	72373	65260	53392		21642	17878	10860	26614	9897	24959	15846	39970	20343	24738	34997	28981	57010	7129	17283	16128	30388	10927	18117	13392	13101	8386	25020
683	34583	34432	23799	47766	19102	63452	44244	71762	35711	43007	62176	121377	102574	15850	37829	26945	64012	24092	38162	28014	30048	18504	75749	64351	54269		23862	17814	11708	26545	9625	24897	15950	39871	20159	24902	34845	28761	56977	6633	17554	16593	30539	11061	17244	13661	13302	8012	24865
684	35337	34804	22662	46830	19178	64298	43937	71712	36330	43266	63240	121432	101305	16058	37717	26780	64079	24371	39267	27721	29543	18073	77922	65199	55124		23769	18008	11327	26574	9595	25239	16301	41232	20097	24770	34683	28310	56667	6927	17731	16435	31157	10877	17954	14131	13528	8415	24954
685	35367	33977	23464	47312	19514	64097	44016	71167	35841	42907	62802	121569	104757	16007	38345	27448	64188	23862	38687	28105	29672	18132	79894	65485	56537		24241	18114	11342	26299	9384	25652	15785	41332	20489	25327	34308	29147	55995	6855	18007	16242	30962	10766	17019	13759	13256	8259	24682
686	35359	34712	23180	47180	19282	64010	43918	72198	35945	42275	53086	120483	110577	15788	38273	27411	63535	23685	39346	29621	29959	18218	81238	65087	57430		23704	17823	10841	26519	9364	26394	15673	40733	20602	24765	34040	28846	56143	6875	18378	16411	30384	11849	17382	13517	13223	8111	24358
687	35853	34678	23249	48948	18814	64402	43519	70572	36182	42777	63346	119464	110951	15564	39428	26735	62428	24317	38803	27836	29960	18375	80772	65843	58551		25228	18203	11155	27042	9534	26853	15694	40859	20677	24824	34184	29089	56498	6919	18321	16038	31042	12064	17633	14564	13372	7991	24619
688	35331	34988	23438	48948	19168	64735	44415	70240	35818	42984	64154	117736	110099	15403	39222	27272	66291	23882	38420	29287	29548	18163	80048	64504	58941		24313	18093	10925	26409	9516	27848	16359	41140	20417	24234	33400	29530	56478	6965	18573	16714	31441	12133	17437	14336	13093	7760	24868
689	35425	34581	24069	49715	18787	63870	47953	72299	36250	41684	64577	117097	109743	15929	39407	27371	65643	23900	38883	27905	29980	18499	79981	65385	58832		21825	18410	11566	26999	9377	28425	16389	41947	20390	24605	27429	28930	56606	6749	18154	16406	31759	10834	17355	14243	13489	8011	24715
690	34940	34403	23084	49478	18766	64640	44176	72948	35748	41613	64784	116488	109789	15574	38572	27352	65725	24310	38969	27922	28030	17786	79291	64533	57764		21617	18500	11261	27004	9194	28454	15996	40934	20532	24429	33455	29133	56794	6693	18238	16319	32459	11401	17806	14641	13628	8476	25066
691	34578	34750	23439	49791	18738	63583	43927	70421	36455	42406	59017	101486	110369	15752	39806	27857	65452	24007	38289	28978	27787	18268	79941	64836	58208		23140	17929	11571	26957	9442	27492	15927	40882	20585	24486	33733	29498	56672	6745	18128	16799	32483	11492	17738	15534	13070	8024	25305
692	34704	35287	23112	49157	19257	64363	44881	72802	36848	41299	59625	100634	107193	15989	39483	27528	67098	24466	38981	29950	28608	18105	78205	64583	58078		21867	18370	11309	27051	9429	28426	15815	41323	20603	24342	34260	29350	57032	6669	18292	16796	32744	11300	17851	15490	13540	8146	25111
693	33898	34960	24129	49671	19366	64364	44162	72215	36214	41480	60981	100198	109398	16293	39218	27209	67503	24479	39029	28089	28499	18200	78301	64595	57675		22737	18419	11011	26877	9395	28303	15705	41215	20460	24409	33745	29184	56046	7103	18143	16948	33627	11115	17308	15720	13134	7974	25497
694	33542	34541	23190	49890	19401	64184	43570	70792	36833	42595	60947	99475	110477	16126	39761	27660	69185	24311	38451	27988	28610	17808	78240	65279	57075		22943	18851	11306	27249	9272	27993	16081	41843	20649	24597	34097	29810	56233	7295	18558	16875	33169	12198	17133	16154	13307	8312	25147
695	32932	35192	23064	49490	19161	64458	43406	71675	36591	43192	60208	101401	111194	16079	40061	27612	69189	26021	38546	28610	28244	18193	78513	64595	56539		23673	18474	11234	26752	9199	28223	15841	42001	20803	24190	34245	28921	56257	6884	18401	17221	33435	11914	17644	16875	13375	8337	25199
696	33658	34571	23140	48930	19099	58884	44040	72877	36226	42297	54461	99979	111353	16387	39274	26937	71296	24414	38797	29236	28179	18121	78207	64440	57128		22595	19378	11731	26544	9426	28606	15595	42178	20475	24458	34385	29475	56971	7167	18478	16806	32836	11829	18447	16099	13371	8278	25119
697	32773	34168	22934	49521	19618	64503	43959	71107	36366	41330	64677	101402	109354	16188	40221	27846	72811	24697	38552	28584	27495	18384	77661	65203	56531		22776	20322	11566	27083	9532	28354	15994	41525	20612	24403	35121	28655	56325	7030	18329	16863	33597	12145	17565	16489	13260	8098	25056
698	32960	34798	23417	55994	19167	65069	43516	71193	37035	41198	63831	99038	110782	15885	39445	26335	72628	26419	38677	29257	27765	17565	78131	63747	56188		23187	20733	11109	27607	9330	28184	16185	42230	20733	24502	34838	29117	56771	6954	18288	16950	32573	11773	19111	16759	13262	7899	25291
699	32640	34349	24157	49224	19154	65626	43854	73709	36886	42505	62901	111135	110044	15502	39462	27374	73041	24200	38587	29389	27953	17868	78673	63917	57285		22767	20852	11280	27014	9634	28106	16113	41800	20455	24004	31244	29350	56818	7059	19026	16845	32476	11885	18244	15828	13317	8014	25531
700	35101	34117	23771	49264	19811	65128	44055	71285	36571	43041	63648	109047	112020	15393	40320	27169	71738	24092	38566	28499	27796	18200	76859	64319	56929		23360	20557	11198	27883	9688	27777	16163	42326	20753	24141	35246	29060	56613	7042	18641	16923	33075	10990	17904	17185	13258	8427	25227
701	34282	34231	23391	49526	19388	65329	44845	71836	36492	42174	63776	107502	113077	14993	39779	27611	71825	26248	38779	28484	28534	17741	76657	63888	57883		22807	20206	11482	27535	9580	27288	15792	41765	20785	23962	36024	28908	57118	7433	18277	16988	32751	11890	17890	16792	13758	8104	25347
702	35324	34661	23380	49856	19792	66143	43657	72259	37028	40931	63583	95995	111719	15367	39439	27670	70642	24435	38568	28612	28183	19060	76619	63758	58005		21840	20416	11503	27837	9664	27546	16233	42354	20749	24177	33552	28939	56407	6991	18677	14802	32538	11180	17665	16874	13153	7088	25703
703	36322	34230	23314	49568	19807	65395	48171	72172	36689	40765	54046	107149	123744	15310	40450	27145	70921	24776	38487	30235	28499	17801	76612	64416	58672		22401	20336	11610	27829	9715	27615	16118	41796	20244	24083	35677	29514	57348	7336	18911	14775	32307	11229	17708	17072	13344	7815	26093
704	35886	34353	23386	48873	19699	64878	43841	72209	36565	42612	54126	96729	122423	14531	39199	27219	69644	24628	38628	29157	28425	17596	77147	64795	57941		19594	20313	11587	27780	9256	27928	15913	44970	20648	23789	33136	29721	57307	7220	19137	15172	32406	10878	17997	17107	13586	8230	26193
705	36672	34134	22251	48578	19390	65054	44316	72202	36571	42696	55365	95604	129390	15022	39285	27941	70152	24847	38785	29672	28299	17789	77067	63789	56858		20740	19960	11445	28038	9628	27759	16076	41364	21328	24069	36271	29390	57142	6911	18560	17774	31396	11889	17689	16844	12968	8154	26593
706	37556	34121	22115	48341	19081	65365	43631	72266	36740	43918	65620	95688	131111	14462	40570	27478	69654	24981	38165	28521	29108	18362	76436	64456	56394		22988	19605	11608	27845	9571	28008	15678	42389	20721	24259	35747	29526	56940	7226	18629	15730	31977	12097	17088	15341	13362	8149	26938
707	38552	34054	22206	49525	20010	66073	43733	72273	37356	42888	65726	95071	136882	15050	39962	27238	69053	24292	38520	28353	28077	17892	75815	64302	56517		21163	20169	11810	28008	9516	28267	16065	42185	21239	24189	32799	29630	56452	7181	18471	15830	31374	10836	17597	17202	13346	8187	27627
708	38882	34878	23212	49260	19063	65093	43628	72712	36979	43105	66254	95571	138803	15602	40303	26976	68737	26045	38419	28692	30203	18350	75983	64476	56826		21840	20489	11768	28079	9862	27468	16191	41869	20905	24097	36223	29719	56312	7025	18601	17876	31397	12128	17807	16880	13135	7962	27854
709	37562	34571	23448	49028	19171	65470	44156	72920	36911	43085	66702	95051	144276	15300	40563	27743	69139	26145	37961	28574	30538	18586	77065	64303	56879		22187	20254	12283	27584	9280	33770	16055	42191	20883	23799	33256	29409	56280	7243	18282	16937	31471	10407	17821	17276	13488	8212	27217
710	38287	34191	23725	48217	19130	66365	43944	72588	36956	43060	66810	95123	145257	15349	38519	27627	69016	26207	37978	29384	29558	18324	76590	63166	57014		20086	19549	11311	28351	9690	34151	15492	41855	20623	23977	32708	29857	56653	7096	18808	16837	31065	12168	17633	17351	13549	8411	27555
711	38621	34921	23150	48983	19232	65843	44165	73942	37500	42469	67214	94913	107974	14835	38060	27697	67685	24776	38473	30560	29930	17779	75752	64883	56609		20306	19758	11636	27698	9597	33730	15851	42261	20648	23185	32788	29868	56957	7166	18823	16917	31117	11061	18138	17117	13527	7916	26578
712	38730	34774	23431	47002	18911	66148	44388	73206	37134	41647	66488	95717	110960	14706	40837	28098	69233	26718	38375	31282	29961	18370	75850	64151	57609		20823	19779	11846	28385	9584	34239	16438	41996	20510	23361	32532	29647	57230	7075	18668	16955	31089	11061	17549	17209	13291	8169	27379
713	37991	34197	23582	47594	18817	66513	43883	72381	36526	42847	66008	95189	115907	14879	39484	28106	68649	24098	38722	31842	29928	18036	76322	63897	57636		20740	20011	11597	28948	9565	33608	16181	41574	20748	23753	32300	29616	57351	7341	18874	17002	30478	12104	17888	17470	13357	8142	27000
714	35645	35127	23439	47123	18893	67041	44211	71782	36922	41098	67091	94909	115622	15504	39175	28503	68127	24421	38387	31501	29986	17691	77240	63966	58953		22786	19892	11842	28524	9424	34247	15801	41334	20891	23076	32055	29967	57518	6938	18994	16891	30673	10779	17659	17462	13120	8403	27406
715	35426	34818	23143	46921	19072	66172	44146	73560	37229	42136	66982	94456	114126	16219	38970	27737	68674	24543	38625	31514	29976	17584	77090	64162	59555		18118	19617	11680	28235	9365	33547	15363	41929	21155	22882	32542	30006	56732	7158	18256	17195	30732	11983	19104	17181	13176	8197	27320
716	34551	34744	22775	47670	19170	66770	44190	73720	36683	40785	66529	93467	109242	15510	38923	28179	68080	24754	38300	30619	29805	17969	76297	63952	61489		21558	19495	11705	28356	9268	34017	16080	41736	21017	23085	32328	29982	56709	7311	18784	16522	30695	11772	17597	17725	13372	7253	27183
717	35108	35305	22995	48221	18655	66531	44060	74084	37357	42704	66599	93619	106743	14918	39442	27397	68485	24605	39145	30438	29802	18292	77821	64015	63350		21610	19075	12023	27516	9362	33664	15686	44852	20337	23753	33643	30464	57791	7218	19480	16281	30580	11183	17922	17440	13243	8095	27693
718	35608	35194	23586	55006	19250	66641	43669	74866	37186	43082	66388	93633	137018	15091	38516	27421	69038	24391	38529	30866	30664	18135	78138	63659	65289		21178	20141	11869	28320	9511	33862	15559	42569	20868	23396	32810	30060	58065	7217	18841	16954	30369	11090	18172	17785	13402	8123	28453
719	35350	34962	23390	49952	19443	66439	44135	74369	36651	42780	55253	93756	135224	14996	39284	27586	69907	24128	38661	30450	29749	18086	78048	64395	67205		19582	19509	11771	27797	9603	33795	15960	42531	21419	22945	32915	29871	57675	7248	18859	17047	29933	10995	17773	17719	12975	8299	29362
720	36161	35688	23847	49445	19312	67585	44208	74057	37195	42566	65578	93640	134654	14645	40281	28055	69964	24612	39047	30180	29587	18448	77569	65016	66703		20400	19929	12082	28469	9279	34388	15648	42893	20760	23151	32873	29823	57055	7266	19010	17087	30356	11856	17905	17049	13166	8113	29483
721	37067	30898	23227	49294	19144	67347	44291	74021	36989	42875	65415	92533	133576	14736	40111	28340	68912	25119	39407	29775	27530	17946	78549	63915	66526		20652	19574	12020	28674	9062	33815	15720	43241	20856	23336	30707	29596	57566	7338	18984	17645	30332	10833	19420	17054	12876	8081	29350
722	35205	34246	23983	48389	18674	66535	43516	73645	36746	43551	65485	92427	133295	14760	40966	28870	69116	24549	40325	29853	27740	18075	78590	64292	66473		20384	19567	12185	28670	9623	34165	15672	43548	20338	23584	32930	29901	58929	7333	18928	16796	30149	11851	18175	17875	13523	7886	29081
723	38055	35062	23563	49717	18552	67256	43610	74576	36433	43266	65376	92979	131860	14765	40379	28679	69611	24557	40007	29460	27769	18288	77847	64239	65471		18403	18882	12134	28384	9479	33120	16012	44413	20922	23619	33069	30392	58587	7179	18238	17111	30758	12041	19651	17472	13594	8011	29117
724	34111	35222	23017	49133	18500	66814	42957	74925	36749	41605	66622	91455	132054	15223	40170	28827	69245	25032	41986	29803	27320	18540	78738	65019	65794		18771	19353	12161	28486	9449	34339	15613	43327	21015	23486	33610	30234	59787	7205	17942	17223	29854	11198	18353	17627	13121	7268	28833
725	33879	34734	23543	49885	19438	67672	44360	74820	37394	42294	64840	92539	133739	14825	40766	28424	68601	24750	42344	29506	30562	17651	78882	64407	65360		19684	19142	11983	28475	9416	33416	15646	43605	20825	23085	33367	30393	58752	7183	18581	17146	29189	10973	18421	17707	13372	8441	28963
726	35713	34640	23531	48696	19016	67481	43889	74615	37192	43949	64717	92416	138259	14653	40277	29039	69369	24601	42350	29283	30434	18524	78589	64299	64445		22665	19563	11770	28387	9127	33289	15579	43531	20871	23810	34134	30148	58982	7726	18670	17158	29636	10760	18160	17635	13311	8159	28601
727	34535	35008	23728	49117	19107	67102	44052	74616	37537	43332	64951	92215	142459	14646	41652	28958	68453	24501	42839	29780	29720	18177	78908	63874	64365		21524	19375	12180	28585	9420	30607	15843	43147	20646	23399	33364	30395	58485	7905	18855	16891	29994	11296	18569	17767	13370	7835	28832
728	35391	34956	23291	49027	18985	67135	43524	75208	37163	43181	65075	91711	101273	14915	41066	28991	68706	24193	43044	29592	30029	18349	78907	63877	63815		21605	19435	11652	28546	9387	31488	15855	43178	20635	23404	33129	30286	58802	7561	18743	17493	29177	11374	18651	17661	13205	7161	28611
729	34415	34912	23384	49067	18562	68985	44090	75547	37408	43051	65406	92376	135212	15000	38841	29139	67992	24572	42472	29981	29777	17962	79952	64397	62931		19332	19013	11940	28434	9407	33172	15968	42920	20663	23196	33413	30528	58687	7422	18469	17425	29922	12321	18777	18076	13240	8532	28503
730	36771	34097	23869	48732	19255	67062	44239	74680	37747	41772	65720	91854	131941	14967	39186	28502	67627	24434	41676	29422	29564	18385	80057	64564	63774		19764	19134	12380	28919	9448	31142	15713	42426	20494	23873	32933	30918	58154	7639	19324	17652	30117	11802	18720	17935	13329	8386	28243
731	36120	34835	24077	49286	19148	68068	43725	75093	36661	42731	65634	91327	129531	15362	39778	28498	68363	24445	41754	29978	30092	18085	80630	64090	63748		19820	19375	11782	28429	9393	31608	16340	43449	21151	23106	32676	30353	58040	7645	19123	17705	29969	10708	18348	17543	12986	8112	28291
732	36485	33963	23225	48415	18752	67369	44306	74556	37538	41395	65331	91303	127902	15958	39578	27992	68009	24060	41969	29406	29773	18549	81421	63971	63642		21628	19501	12260	28865	9884	31424	15396	42649	20997	23220	33567	30408	58039	7737	18860	17563	30655	12044	18381	18274	13517	8296	28192
733	36054	30180	23499	48595	18932	67541	44136	72842	37757	43043	66927	90945	143123	14924	39842	28776	67379	24808	45683	30214	29225	18447	82286	69527	63269		19841	18968	12069	28743	9537	31837	15895	42161	20773	23608	33472	30724	57407	7839	18401	17622	29973	11900	20218	17137	13329	8202	28443
734	35833	30205	23374	49675	18284	68127	44515	74970	38544	41391	65084	91352	149524	14651	39414	28482	67793	24595	45820	30570	29399	18285	80759	68268	63327		20631	19173	12677	28451	9288	32174	15855	42938	20659	22645	32941	30896	56953	7943	19269	17806	30071	11037	18573	17431	13259	8284	27905
735	35384	36180	23293	49041	18803	67072	43520	75071	38334	41542	65544	91007	148481	15066	40571	28132	67123	24074	42502	30227	29708	18322	81861	67280	62996		20879	19511	12236	28388	9531	32447	15852	42539	20539	22854	33272	30896	56612	7727	18793	17419	30319	12038	19087	17888	13406	8073	28030
736	39009	35950	23932	49261	18912	67807	44282	72867	39014	42806	65493	91127	141122	14574	40145	28685	66587	24407	46227	30514	29498	18411	80383	67884	62082		20470	19480	12304	29136	9111	32484	15396	42038	20781	23343	32927	30901	57073	7174	18979	17479	30511	11477	19037	18151	13196	8536	28283
737	38778	33557	23377	48106	18881	68475	43357	74503	38962	42711	65076	91501	139364	15177	40754	28808	67385	26557	46575	29772	29789	18271	81062	67920	62572		18025	19239	12276	29279	9115	32421	15598	42137	20467	23062	33178	30421	57318	7582	18189	17834	30645	11175	18929	17859	12690	8198	28073
738	39754	33922	23472	49185	19394	68102	44315	74702	38961	41129	65356	91500	139132	15114	39690	28590	66493	23982	41661	30483	30238	17577	81293	68056	62771		18455	20093	12287	28655	9615	32202	16004	41781	20243	23455	32857	30204	57188	7578	18804	17830	30276	11918	18802	17848	13551	8279	27551
739	42091	33472	24034	47958	19646	67737	43888	74970	33597	41668	65252	92299	134475	14741	37612	29115	65741	24286	42035	30466	29395	18120	80813	68356	63801		18826	20156	12191	28775	9669	32256	15602	41652	20702	23338	32827	30853	57105	7444	18876	17520	30761	10757	18852	18195	13035	8455	27637
740	42493	32543	23413	48552	18605	67646	44757	72438	33590	42142	65401	92670	132042	15607	40715	29012	65994	24225	42025	31408	29002	18667	80539	68020	64162		18106	20116	12434	28715	9235	32290	15491	42127	21172	23572	33114	30525	56725	7485	18391	17772	30018	12201	19286	17942	13011	8115	28335
741	44480	32095	23449	48992	19636	68052	44686	74352	38816	41511	64778	92492	131891	15252	39551	29007	65550	23874	42977	31283	29505	18027	80738	67841	64180		17854	20511	12214	28845	9684	32328	15607	41335	20208	22694	33304	30623	56661	7125	18953	17461	29990	12238	19144	18289	13160	8320	27687
742	43652	31805	23006	49553	19087	68665	44506	75297	38940	43130	65192	90833	130574	15174	38650	29070	68871	24626	42037	31445	30108	18540	79908	68013	63526		18419	20425	12336	28784	9391	32030	15824	42555	20409	23610	33282	30606	57185	7537	18896	17871	30254	12496	18720	18396	13365	8294	28133
743	46913	31533	23500	56385	19306	67846	44632	74881	38315	41392	65154	90648	132362	15098	38464	28873	67963	24588	42267	31513	30086	17936	80597	67928	63385		18119	21496	12275	29339	9520	32225	15359	41833	21207	23064	33759	30550	56957	7433	18805	17990	30665	11564	18705	19159	12983	8383	27855
744	48803	31787	23575	55303	19459	67843	44633	72851	38330	43009	65779	90601	133627	15189	37772	27829	68223	26221	42442	32361	29991	17987	80145	68380	64206		18389	22140	11831	29150	9244	31596	15838	41992	20452	22970	33666	30475	57173	7532	18762	17494	30474	12129	18998	19101	12724	8276	27639
745	48141	31751	23879	48988	19494	68108	43891	74831	38157	43055	66035	90374	134755	15075	38101	27989	68181	24345	42174	31546	29540	17862	80266	67249	64185		18728	21478	12566	29286	9450	31434	15720	41921	20645	22739	33421	30648	58064	7254	18706	17524	30411	12218	20263	18516	13594	8158	27819
746	46930	32636	23546	56298	19138	61080	44937	74693	38133	39748	65450	90339	115018	15367	43621	29078	68844	24526	41338	32521	29537	18108	80207	67600	64659		18461	21661	12013	29397	9417	31651	15409	41993	20945	23201	33725	30658	57984	7404	19371	17143	30502	11940	19052	18206	13214	8302	27886
747	45844	32968	23658	49246	19533	67049	44432	72562	37873	39789	64780	90647	116594	15330	42112	28245	65158	24191	45989	31745	29923	17935	81378	66839	64832		20479	21207	12376	29190	9144	31510	15885	41947	20820	22871	33983	30470	59174	7610	19181	17444	30804	11162	20592	18180	12995	8355	27918
748	48778	32811	23616	49018	18691	68291	44249	74452	37843	40269	64940	90234	117118	15144	40564	29506	66923	24751	40895	31873	29736	18125	80990	67610	63921		20455	21517	12261	29825	9575	31596	15887	42226	21182	22449	34333	30116	59254	7585	18804	17535	30019	11285	20146	18156	13077	8282	28115
749	48518	32818	23644	49507	19206	69174	44863	73663	37863	40590	64898	90458	116506	15330	38555	27646	67004	24783	41557	31938	30025	18179	82835	66510	63727		21300	21329	12281	29375	8775	32026	15881	42470	20225	23081	34125	30407	59169	7807	18953	17641	31284	12360	19002	18322	13070	7294	28367
750	47714	33169	23676	49441	18811	68113	44175	75218	38208	40031	65012	89541	115413	14983	42707	27475	68538	24373	42545	31089	30059	18052	82906	67266	63655		21569	21179	12087	29426	9367	30871	15895	41866	21157	22856	33989	30933	59247	7330	18343	17562	31320	12125	19279	18323	13180	8307	28355
751	45865	33223	23098	48613	18969	68434	44339	73619	37845	40190	54375	89653	115029	15199	42078	27204	69439	24316	42386	31725	30270	18413	82895	67707	63467		20643	21225	12040	29219	9214	30970	15660	42164	20119	23123	34185	30699	58608	7530	18988	17623	30915	12302	20618	18607	13117	8492	27285
752	41567	33210	23066	48904	19243	68593	44472	73127	37957	40118	53138	90090	115314	15167	39619	27817	69172	25621	46615	31257	29913	17858	82328	66672	63554		20818	21205	12693	29274	9145	30764	15217	41330	20618	22716	34190	30413	58924	7386	18349	17591	31312	11008	18915	17665	13596	7948	27720
753	38489	33022	23235	55297	19241	68061	43790	74146	37987	40084	64612	91408	116525	14523	43786	27949	69748	26033	41791	31504	29759	18390	80795	66809	63645		20893	20626	11903	28364	8981	29753	15543	41545	20327	22761	33175	30120	58097	7416	18954	17314	31368	12152	19215	17633	13108	8269	27913
754	37878	33104	23944	49829	19229	60506	44117	71100	38537	44049	52804	102159	116354	15282	42980	28093	68298	24670	45447	31152	29551	17962	80925	66845	61825		17942	20686	12229	29465	8556	29832	15603	40592	20392	22635	32459	34667	57657	7468	18649	17475	30834	12399	18935	17856	12973	8124	27555
755	38399	32972	23397	48363	18986	67374	44514	73367	38476	41380	63769	100544	117181	14937	44416	27835	68117	24569	42365	30403	30324	18202	80442	66996	62499		18152	20496	11908	28779	9229	29053	15636	40806	19712	23078	33478	34182	57681	7406	18710	17586	31243	12119	19140	17872	12706	8227	27552
756	38626	32457	23199	48990	19148	66630	44168	73060	37602	41260	63847	105403	117509	14736	43579	27647	66799	24617	46193	30963	29761	18488	81511	67662	62286		19622	19977	12232	28632	9466	28573	15699	40781	19966	22021	33871	34366	57956	7392	18543	17073	30771	11987	18677	17074	12726	8179	27114
757	39417	34898	23640	48168	18956	66829	44499	74717	37996	41477	63151	106932	117146	14998	42475	26684	66113	24075	45669	30391	30253	18231	80897	66870	62213		16441	20407	12175	28449	8937	28513	15212	40213	20024	22498	33757	34666	57440	7236	18427	17175	30870	11087	18925	16984	12957	8317	27223
758	39759	32617	23292	47550	19171	66639	44013	74074	37486	41238	52241	107104	117073	15320	41907	27199	70369	26339	41287	30004	30279	17944	80230	66483	61259		19086	19818	11915	28686	9376	26917	15664	40629	19590	22289	33300	34174	57432	7102	18285	16265	30621	11851	20331	17023	13115	8384	26472
759	41234	32041	23161	46712	19151	65190	43786	72417	37935	40635	63235	107620	117091	15316	41781	28016	54874	24709	45175	30185	29556	18520	79414	66586	61225		20108	19859	12349	28785	9089	27757	15585	39738	20647	22103	33017	33977	56728	6962	18445	16876	30694	12140	20196	16918	13009	7966	27212
760	41411	31911	23529	45585	18803	65731	44295	73601	37267	40138	51952	105525	118844	14856	41377	28337	54577	23990	44835	29979	29446	17836	79408	66777	60862		19269	19878	11694	28937	9044	29255	15509	39197	20651	22226	32823	34768	56087	7308	18683	16613	29811	11979	18534	16858	12998	8521	26893
761	42956	34981	23413	54484	18778	65149	43837	73105	37912	41001	62357	100016	121079	15226	41372	28444	54234	24140	45134	29267	29774	17896	79357	66785	61275		20997	19638	11936	28632	9244	22534	15867	39054	19620	22068	32323	34516	52241	6886	17942	16362	29930	11983	18459	16847	12783	8065	26605
762	42456	34182	24446	46754	18980	65433	44854	73623	37919	40856	62378	95597	122429	16287	39926	28032	53078	23754	44801	30338	29849	18130	79917	67125	61028		19399	19292	11427	28410	9024	30768	15370	39223	19930	21922	32696	33899	50068	7054	18270	17004	29859	11528	20023	16487	12816	7925	26409
763	41275	34704	23272	47978	19324	64362	43878	72599	37871	41672	62491	97783	118539	14969	40355	27962	51308	26186	45583	30109	29344	18172	79558	66101	61134		20040	19312	11824	28302	9204	29719	15529	39290	20185	22186	33331	28427	49263	7259	18227	16428	30321	11939	19049	16882	12930	7973	26347
764	45047	31211	24142	48244	19113	64078	43973	73007	37449	40396	61766	97523	113641	15041	39451	28003	51008	24148	44831	30106	30194	18116	79669	66461	61302		20132	19349	11932	28347	9073	30178	15365	38705	19743	21483	32696	28929	47036	7136	18289	16111	30046	11744	19866	16301	13055	8171	26518
765	45232	30785	23308	48651	19229	57496	43845	72391	37329	40609	62130	97636	110978	14927	40122	28021	50024	23479	45120	29042	29494	18237	79444	66381	60631		20012	19416	11540	27771	8999	29415	15638	38499	19460	21904	32771	30060	46447	6920	18073	16278	29803	11738	19529	16432	12807	8434	26390
766	48152	31051	23343	48253	19026	64587	43644	71680	37673	40996	61627	97193	110996	15548	39588	28168	50752	24213	45244	29346	30053	18349	79124	67183	60141		17483	19497	11564	28251	9099	29753	15655	37941	19839	21880	32413	28848	46581	6884	18508	16023	29810	12210	18261	16365	12811	7935	26246
767	45701	31167	23403	55209	19080	64087	43854	73291	37848	40471	51255	99210	120438	15191	40576	27490	50995	24315	40303	29822	30036	18307	78651	66423	60927		17579	19061	11851	27968	8905	29349	15626	38274	19899	21611	32288	29224	47082	7009	17929	15399	29809	11624	19655	16083	13049	8151	26197
768	43554	31345	23477	48924	18448	56999	44544	73743	38085	40941	51646	98375	122110	15393	40637	27438	50471	24029	44922	28925	29905	17963	79028	66687	59918		17689	18643	11526	28003	9188	28996	15792	38779	20172	21583	32277	29407	49021	7025	18156	15842	29594	10378	19180	15933	12792	8009	26619
769	41385	30717	23500	46804	19277	56803	43893	73249	37716	40475	51561	98825	122623	15224	41919	26313	50493	24334	44879	29385	29675	18063	78656	65939	59945		17313	18967	11723	27425	9574	29176	15693	38783	20153	21572	31962	29526	53643	7044	17990	15732	29310	11334	18070	15872	12664	7873	26043
770	43056	29610	23056	47247	18998	63732	43527	73827	37559	40638	60867	97989	122801	14645	40433	28153	50865	23989	44167	29631	29826	18039	78839	67194	59395		19337	19296	11942	27607	9001	22451	15173	38081	20239	21160	32771	29433	54610	6941	18267	15396	29190	12002	17896	15489	12948	7841	25971
771	44311	29327	23359	46692	19065	63231	43442	73375	38403	40952	51915	99032	122498	15297	40962	27529	50379	24250	44444	28905	29113	18450	78431	66801	59277		18127	19117	11781	27623	8853	28320	15628	37419	20167	21742	32420	29419	54743	7211	17602	15606	29638	11876	19375	16140	12736	8146	26546
772	39666	28851	23253	46500	18831	62651	43037	72310	37534	41265	62259	98392	121869	15465	41965	27079	50350	23661	44470	29005	30106	18154	78041	66122	58278		18091	18472	11763	27265	8929	22130	15325	37655	19717	22012	32365	29651	54710	6682	18213	15641	29048	11654	17985	16043	12623	8102	26129
773	39386	33765	23669	46194	19343	63900	44027	72531	37871	40649	62331	98181	121758	15148	42099	27510	50259	23841	44388	28734	29957	18282	77210	66388	58744		18340	18603	11798	27197	9103	21798	15069	37760	20180	21610	31883	29003	54368	7189	18052	15182	29278	11833	18343	15506	12711	7394	25441
774	39084	33189	23146	45216	19242	63914	43716	70736	37487	41267	61804	96363	121135	14863	42484	27992	49758	24018	44122	29571	29786	18182	78075	66692	59027		16329	18775	11536	27395	9194	28496	15815	37252	20209	21618	32544	29682	55094	6745	18168	15351	29304	11400	19116	15681	12639	7736	26033
775	43658	33241	22647	45681	19182	62667	43767	71869	38080	41170	61970	92764	122378	15074	43680	26995	49310	23656	43950	29129	27760	18520	77964	65701	59771		16496	18700	11377	27193	9761	27586	15200	37858	19914	21949	31985	29364	54674	7446	18335	15572	28504	11939	19504	15565	13037	8768	25839
776	43327	33686	23010	45838	19135	62773	44201	70419	38135	40639	61915	94186	122909	15554	44468	27313	49735	24070	43959	28681	29595	18795	77687	65923	59215		19006	18310	11711	26885	9341	22248	15286	37545	20254	21338	31473	29490	54220	7139	18274	14880	28970	11654	19256	15408	12899	7956	26078
777	42414	33052	23449	46484	18937	62299	44236	72424	38019	40332	52050	95110	122629	15502	44548	26960	50185	25829	44119	28165	29746	17791	76714	66079	58877		16448	18380	11639	27306	9026	27694	15420	37334	19406	21241	32401	29281	54576	7263	17690	14787	29445	11795	18185	15252	12772	8465	26675
778	39380	32809	22871	47360	18554	54699	44404	70911	37605	40744	51223	84044	122269	16059	46220	27366	50372	23355	43576	28747	30004	18185	76443	66032	58900		18730	18839	11680	27168	9248	21814	15410	37413	19478	21760	31353	28948	54061	7200	18066	15115	29174	11799	18048	15262	12611	8325	25708
779	40053	33090	22691	47062	18876	61850	44137	72574	37174	40918	53682	94130	122497	15402	46909	26943	51589	23547	43626	29243	30254	18183	75966	66114	58421		17375	18647	11411	27206	9679	21612	15363	37539	19654	21375	31474	29956	54452	7075	17718	14865	29157	11968	18070	14956	13244	8214	26899
780	38165	32766	22629	47310	18568	62587	44350	72402	37639	40601	62723	84046	123664	15406	46935	26694	51580	23759	42447	28869	29549	17918	76145	66318	58339		18748	18532	11437	27270	9166	27619	15598	37586	20151	21350	31380	28792	54268	6823	17825	14508	29814	11414	17528	15637	12752	8171	25523
781	38327	32706	22751	54736	19610	62700	48345	72521	37343	40453	61782	92711	122473	15413	48358	26898	52938	23598	42948	28196	29845	17951	75273	65729	58342		17328	18659	11509	27092	9194	21369	15188	37643	19729	21307	31494	28555	53669	7477	18059	14734	29271	11877	19373	15021	12903	7257	25242
782	42432	32599	22657	47570	19422	61314	48432	70621	37939	40534	52466	83244	121381	15216	47736	27001	53790	25799	42094	28646	30125	17731	75834	65506	58763		19179	19151	11167	27145	9172	20977	15091	37973	19721	21551	31186	29225	53660	7433	18031	14689	29085	11907	19115	14957	12975	8166	25343
783	42194	33020	22589	47447	19074	55617	48096	71571	38104	40692	62512	92667	118755	15279	47279	26419	53584	24144	42237	28792	29759	17969	75739	66061	57841		17769	18587	11597	27366	9280	21416	15601	38399	19852	21294	30599	28435	53798	7232	18017	14732	29615	11547	17889	14762	12944	7583	25647
784	40478	32497	22836	47943	18593	55113	43779	71241	37539	40301	51885	82421	119466	14972	48066	26552	54436	23838	42823	28210	29449	18067	74644	66136	59506		18005	18610	11767	26847	9418	26604	15614	37701	19759	21387	30923	28971	54130	6767	17367	14400	29180	11534	17870	15195	12567	8209	26287
785	40002	32273	23222	47260	19132	55069	48493	71246	37445	40580	51895	91743	119510	15088	50261	26699	54293	23359	42336	28451	30054	17997	75499	66085	57669		16740	18402	11743	26310	9202	20856	15078	37427	19621	21441	31004	28948	53458	6671	17747	14649	29253	11951	17890	15264	12743	7965	26539
786	40017	31486	22522	47641	18604	55841	48579	71060	38007	40725	61637	91813	120833	14639	50965	27714	53239	24018	42246	28645	29560	18307	74612	65817	58197		18915	19170	11251	26350	9442	21268	15407	37425	19656	21054	30218	28439	53349	6899	17904	14771	29171	11409	18981	15569	12684	8266	25396
787	40012	32114	22638	47747	19154	56604	49725	70422	37141	40203	52153	90949	123552	15156	52668	25857	52406	23730	42282	28280	29541	17884	74231	65904	57616		17591	18512	11706	26296	8885	21347	15658	36902	19720	20804	30680	29037	51438	6818	17857	14708	28820	11526	18974	15419	12972	8135	25195
788	38897	32041	22959	46976	19464	36693	51006	70312	37867	40372	51399	82009	120540	14607	52047	26889	51825	23584	42137	28890	29910	18307	75040	66233	58204		18385	18978	11429	26568	9400	20992	15327	38042	19380	21183	30165	28731	49147	6823	17832	14567	29134	11583	18950	15496	12948	7922	25253
789	39885	31188	23254	47107	19401	56878	51609	67636	37507	40555	51484	82144	117198	14188	52677	27085	50659	23710	41579	28882	29622	18153	74301	66276	57273		19211	18394	11454	26767	9140	26413	15760	37591	19265	21034	30512	28698	55177	6470	17916	13929	28682	12004	17353	16026	13485	8294	25590
790	40472	31543	23448	54005	18953	38555	51703	70545	38179	40055	61388	81859	113982	14873	52354	27340	51033	24158	41596	28518	30123	18079	73409	65549	56942		17431	15659	11336	26493	9464	21072	14844	36739	19071	20650	30573	28465	54629	6923	17932	14623	29186	11371	18584	15531	13406	8245	25162
791	38217	30997	23051	47367	18892	57344	51434	70596	37811	39646	61643	90300	112696	14730	47563	26952	51443	23733	42465	28507	30074	18704	74169	65610	58695		20150	15723	11733	26179	9133	20284	15223	37180	18545	20779	30587	28926	43868	7295	18000	14625	29206	11895	17855	15206	13240	8450	24718
792	38176	31162	23060	53542	19410	55675	50010	70631	37971	40195	50938	82323	115280	15384	52458	26765	50948	24066	42461	28405	29152	18134	73471	65101	58186		17649	16163	11398	26731	9093	20850	15396	36648	19480	20993	30949	28517	52158	6701	17846	14192	29175	11616	18546	15434	12879	8377	25298
793	37433	30943	22949	47046	19058	54274	48610	70687	37333	40420	51111	82043	121552	15041	51809	26559	49906	24056	41611	29001	29843	17990	74212	63936	57306		18768	15555	11465	25902	9599	20820	14938	36500	19703	20577	30555	28729	52918	6701	17950	14434	29877	11412	17844	15324	12889	8328	25173
794	31814	30795	23632	47103	19184	60304	44045	71573	37934	39800	50633	82298	120556	14853	52189	27089	49945	23867	41279	29198	29797	18069	74592	64145	57365		16580	15614	11739	26139	9391	20842	15293	36688	19328	20494	30391	28078	53800	6810	17905	13791	30402	11392	17965	14957	13039	8239	24543
795	35103	30804	22836	47027	18590	59666	43252	70715	38281	40380	51228	80934	119481	14867	46832	27083	50761	23764	41650	29368	30188	18250	73715	64104	56555		16712	15525	11142	25689	9686	19858	15181	36819	19282	21083	30167	28836	47863	7232	17997	14040	30684	11761	19025	14044	12950	8125	25080
796	35848	29612	23062	47206	19472	59871	47523	70108	36902	41662	50903	80901	119558	14520	52566	26770	51764	24183	42089	28583	30036	17737	74463	63549	56060		18672	15874	11180	26301	8987	20714	15758	37094	19269	21114	29969	28502	50342	6747	18053	13881	30350	11596	17768	14329	13156	8284	24742
797	36056	33824	22553	47193	18365	59916	43428	70120	37081	40733	51398	90978	120803	14874	52965	26492	53280	24135	42516	29515	29548	18246	72515	64135	57033		18082	15699	11177	26500	9607	20630	15370	36155	19081	20563	30056	28570	51144	6696	18197	13701	30242	11831	18649	14282	12879	8216	24443
798	35463	33967	22572	46309	19581	59017	43637	70123	38095	40705	60817	91848	119336	14982	53648	24992	55412	24450	41487	28880	30224	18230	73615	64662	56901		15782	15287	11588	26146	9327	19842	15755	36520	19532	21138	29774	28138	51444	6769	17930	13674	29980	11540	19022	14304	12853	8400	26093
799	38501	34134	23385	47084	18808	59820	44313	69990	37361	40767	60826	92185	102969	15335	53236	27558	55742	25884	41706	28414	30014	17587	73276	64278	56847		18760	15457	11522	25986	9455	19648	15528	36590	18527	20281	29337	28097	51876	6585	17588	13915	29705	11546	17948	14383	12842	7874	26276
800	36467	34050	22522	46797	19006	59560	44108	70251	36901	40062	60279	95967	102989	14931	52144	26625	55293	23633	42706	29173	29691	17968	72636	63188	56262		17621	15553	11550	26077	9131	25262	15202	36547	18471	20888	32767	28596	51517	6575	17641	13562	30103	11666	17814	13959	13064	7324	26042
801	38106	33873	23154	46849	19324	59495	47960	70756	37723	40496	60306	97367	102768	15183	53290	26256	55212	23634	41823	28034	30193	17767	72427	63237	56114		15814	15855	11373	25955	9293	24677	14883	36459	19426	20647	29442	28522	51506	7096	17879	13550	29817	11949	17516	13702	12690	8415	24775
802	38789	33511	22832	46185	18249	42082	48232	70265	37182	40960	60342	97143	102140	14825	52567	26516	54126	23583	42633	28080	29944	18089	72678	63313	56692		18394	16047	11307	26396	9318	25342	15369	36512	18798	20736	29600	28699	51252	6366	18146	13518	29687	11721	17697	14165	12967	7786	25288
803	40240	34033	23093	53369	18933	40907	47708	69999	38162	41033	59566	98315	102044	15193	53043	26398	54317	24017	41991	27941	30079	17160	72572	62722	56657		16967	16457	11189	25819	8971	24609	14839	36485	19096	20975	30059	28366	50351	7158	17824	13495	29645	11716	19484	13893	13164	8146	25390
804	37704	33029	22658	45594	19192	41588	48120	70636	37818	40313	60413	96516	102892	15502	52743	25780	53824	23851	42792	27576	30077	18309	72311	62972	55640		17373	15645	11295	26066	9145	25005	14841	36649	18552	20932	29702	28459	48502	6670	17762	13707	29645	11781	18060	14050	12759	8167	25803
805	37812	32962	23450	45462	18741	39554	46996	70511	37390	39915	59936	94080	101902	14748	52389	26908	53393	25468	43214	28414	29939	17543	72207	63583	56322		17245	15637	11639	26311	9311	25367	15469	36506	18635	21031	29492	28245	47435	7191	17527	13740	29835	11942	17632	14124	12862	7931	25448
806	37006	32968	22919	44952	18949	40906	47559	70244	37199	40281	60184	91741	102985	15098	52794	26957	53168	23957	42817	27776	30154	17871	71905	63478	56482		17795	15844	11401	25598	8963	24425	15099	36517	18722	20807	29716	28360	54257	6982	17564	13171	28610	11793	17735	13989	12949	7885	25050
807	35685	32463	23359	44402	18702	41135	47374	70170	36881	40431	59801	89912	102737	14972	52402	26564	53396	25937	42766	26910	29849	18059	72224	63623	56446		17842	15888	11265	25647	9312	24837	15361	36255	18792	20576	30035	28098	52614	6347	17771	13491	29762	11947	17657	13750	12817	8068	25420
808	36997	32463	22814	52718	19497	41190	47464	70375	37362	40804	60376	89822	102967	15568	52629	26742	52067	23601	43063	28004	29625	16286	71753	62457	55685		17526	15763	11501	25400	9624	24714	15356	36293	18756	20532	30426	27943	46246	7006	17593	13406	29522	11571	18529	13621	12750	8031	25456
809	37728	32617	23059	45698	18342	40780	47655	70017	37099	40268	59839	89084	104107	15266	52520	26858	52253	23686	42960	27647	29739	16153	71528	62782	56144		17567	16215	11128	26223	9356	24296	15242	36131	18312	20430	29556	28343	49627	7137	17728	13654	29552	11557	19225	14008	13303	7886	25062
810	38024	32765	23001	46299	19141	41011	48118	71152	37590	40201	59867	87649	104448	15069	52829	26161	52889	25515	42815	27098	30141	17959	71819	62801	55743		15680	15700	10812	25514	9440	24302	15061	34990	18657	20693	29917	28144	49478	6545	17965	13539	29853	11447	19161	14106	12998	8148	25531
811	41921	31789	22965	45840	18874	40841	47477	70177	36935	40584	59987	89005	107523	15325	51916	26716	51613	23815	42241	28246	29255	16344	71496	62723	55551		16663	15900	11160	25571	9082	24189	15492	35738	18401	20707	30046	28156	47571	6851	17803	13714	29097	11648	18089	13821	12500	7841	25107
812	42362	31333	22965	44527	18588	40476	47809	70108	37295	39906	48650	79817	108123	15360	52033	26365	51916	25439	42965	27997	29436	16610	71811	62053	55732		18439	15619	11005	25420	9335	23756	15525	36003	18782	20484	30557	28863	45846	6680	17516	13121	28968	12044	19325	13715	12896	8433	25023
813	41104	31771	21607	46507	19267	39812	47348	70584	37491	40484	53336	79364	110602	15306	52723	26734	52282	22661	42582	27590	29675	16501	70925	62261	55186		16970	15712	11273	25637	9484	24246	15192	35271	18336	20749	30845	28192	43907	6617	17563	13844	29383	11601	18155	13480	12713	8200	25144
814	40158	31457	22423	46248	18985	40362	46792	69049	36607	40447	54067	87616	111907	14795	52057	26935	51438	25674	42354	28058	30361	17825	71764	62307	54913		17795	16309	11338	25178	9617	24232	15158	35069	18208	20746	30537	27809	42863	7186	17847	13243	28995	11875	18993	13759	12852	8137	24918
815	44126	31252	22484	45200	18797	56936	47549	68119	36739	40775	54546	79328	110649	15386	52601	26242	51637	23440	42313	27954	29882	16831	71572	62706	55337		16493	16218	10898	25290	9140	24532	15342	34908	18363	20547	29954	28231	42670	6782	17893	13501	29379	11940	18882	13715	12849	8097	25018
816	46438	31105	22185	45377	18760	57566	43819	68805	37150	40718	53389	79057	106592	15118	52382	26480	51555	23959	43373	27359	30545	16278	72105	62599	55216		18121	17132	11281	25203	9807	23958	15271	35698	18169	20421	30394	27950	43185	6612	17556	13217	29908	11134	18871	13514	12721	7325	24698
817	42284	30978	22249	45944	18953	57840	42618	69061	35742	40120	59743	78739	115930	15347	52437	26160	51208	23735	42781	27174	29758	16341	71427	63102	54962		17699	17761	11133	25379	8941	23966	15477	35445	17974	20842	30137	28356	42870	6556	17585	13144	29500	11703	19138	13941	12668	7880	24808
818	46161	30869	21916	45273	18755	56923	43389	69094	37089	40921	59359	78232	134451	14847	52861	25560	51510	23417	41963	27147	29715	16389	72695	62838	55306		15287	17765	11104	25221	9196	23454	14933	35009	18602	20495	30225	28337	42442	6862	17709	13064	28410	11681	17522	13734	12948	8254	24966
819	46246	30651	22101	44752	18980	56703	43001	69137	37461	39820	59356	79076	133772	15165	53109	25983	51347	25335	42943	26822	29386	16545	71434	63206	55297		13576	17803	11356	25430	9098	23460	15183	35460	17961	20055	30118	27650	52888	6798	17999	13093	28338	11700	17444	13796	12828	6658	24720
820	45281	31199	23068	44922	18816	56581	43298	69697	37058	40188	59005	78636	136950	15144	53483	26054	51443	25352	42546	27356	29330	16473	71768	63463	53929		16741	17700	11353	25707	9499	23880	15799	36072	18277	19969	30282	27993	44937	6559	17557	12729	27626	11594	18168	13388	12728	7951	24517
821	44900	30350	22627	45581	19089	56944	43527	68611	37181	40375	48472	79412	140366	14954	53370	26387	50629	25946	42752	27187	30006	17073	71928	62376	54354		15590	17538	11101	25327	9437	23831	14926	35886	18014	20374	29964	27606	52039	6812	17604	12939	24020	11244	18741	13783	12963	8367	25035
822	46448	30398	22832	45619	19027	56357	43665	69350	36305	40473	58809	79297	141468	14709	52739	26200	49903	24030	42748	27602	27147	16506	71963	62535	54359		15733	17542	11578	25283	8757	23387	15151	35669	17592	19828	29826	27734	51380	6651	17701	13163	21638	11510	18565	13488	12555	8313	25268
823	45918	30290	22891	45947	18676	56296	42914	69754	37167	39621	58916	79217	140229	14641	52424	25835	50090	23612	42479	27490	27307	17996	70332	61796	55504		15126	17668	11337	25276	9271	23534	15110	35742	17994	20196	29698	28292	49383	6578	17805	12788	20950	11762	18756	13004	12912	8217	25055
824	44034	30452	22819	45354	18785	56676	43282	69312	37375	40244	59110	78069	138557	15067	51363	27026	50626	23810	42653	27378	29808	17068	71079	61733	54350		14505	17980	11089	24780	9372	23533	15404	35693	17694	19540	30107	29162	48683	6944	17659	12991	20283	11732	19055	13312	12774	7932	24853
825	41802	30340	22847	45901	19128	57324	44318	67727	37236	40734	58841	86971	135852	14771	51983	26357	50291	23641	42970	27369	27400	16742	70283	61833	54681		14306	17837	11579	25401	9301	23114	15580	35307	18109	20278	29652	27795	48072	6687	17802	12849	20622	11469	18879	13294	12773	8323	24985
826	44532	29911	22975	45899	19022	57112	43324	68328	37015	40475	49032	87327	133384	14906	52369	26736	50130	24058	42192	26977	27922	16867	71033	61148	54005		16895	17604	11592	24195	9157	23495	15151	35187	18377	20515	29911	28632	48714	6684	18004	12763	19930	11723	18736	13826	12331	8251	25053
827	41819	29479	22762	45443	19657	57098	43667	67519	36775	40698	58735	78207	132581	15468	52152	26043	49856	23030	42805	27469	27360	17256	70308	68097	54225		13127	17543	11540	24793	9432	23618	15372	35796	17789	20265	29853	27898	50880	6893	17465	12849	20244	11458	18344	13602	11786	8309	24420
828	41845	33655	22877	45416	18815	56562	44422	68194	37608	40041	59365	77728	132166	14783	52733	25772	50032	23350	41521	27538	30159	18952	71303	62154	54352		15426	17658	11418	24681	9438	23636	14988	35150	18120	20089	29645	28216	52164	6514	17525	11996	19978	11656	18430	13314	12054	8367	25364
829	40307	30657	22833	45413	19228	56420	43091	68009	37032	40875	59514	78007	132115	14740	52187	26088	50124	25754	41732	26921	27240	16845	70783	62046	54568		16015	17772	11052	25651	9579	23497	15344	34622	17805	20039	29450	27493	44308	6587	17805	12758	19910	11770	18755	13354	12117	8074	24526
830	36986	29971	22741	51924	19105	56944	44372	69538	36397	40629	59617	85530	131123	14857	52026	26574	50705	25109	41178	26964	27640	17216	70167	69650	54038		14396	17745	11298	24982	9704	22889	15056	35081	17521	19967	29567	27929	47249	6551	17629	12590	20054	11663	17577	13335	11759	8440	25016
831	36552	28928	22901	45674	18995	56768	42539	69038	36836	40981	58994	77489	127714	14885	52534	26102	50765	25454	41997	26459	27560	17000	70793	68554	54104		15250	17767	11006	24506	9202	23903	14705	34817	17758	19900	29432	28396	47649	6620	17295	12909	20026	11943	18410	13544	12081	8178	24820
832	36749	28889	22306	45340	18855	56191	44102	68938	36922	41110	58940	78480	124581	14553	51949	25803	49782	23851	41127	26834	28108	17001	69388	63049	54719		15358	17671	10963	25156	9404	23064	15152	34926	17644	19760	29202	27582	47528	6728	17424	12599	19802	11537	18715	13376	12461	8017	24507
833	37218	28953	22322	44418	19506	56021	44494	68853	34487	41695	57995	77204	119337	14574	53626	26051	49019	25601	41524	26510	27988	16835	69032	68256	54720		14009	17752	11018	25176	9406	22880	15472	35025	18020	19795	29404	27985	49410	6855	17462	11578	20003	11727	18559	13255	12539	8178	24658
834	35764	33612	22535	44366	19165	56638	43929	69258	35249	40884	59051	76613	118832	14497	52388	25977	49336	25616	41613	27713	27693	17106	69680	62675	54624		14862	15586	11471	24851	9425	23097	14782	34568	17247	20061	29380	27433	49038	6331	17595	12552	20156	11395	18326	13001	12503	8286	24724
835	36626	33513	22480	44850	18954	56276	43137	68286	33582	41259	58983	77350	116632	15182	52678	25300	49617	23533	41035	26806	27077	16894	70363	61705	55046		14722	17000	11393	24796	9054	23155	14784	34490	17744	20351	28978	27850	49135	6715	18243	12156	19990	11637	19087	12945	12616	8277	24552
836	38121	34144	22895	45567	19575	56577	42795	68941	34202	40377	58819	77377	117891	15031	56804	26121	48964	23662	41631	26665	27579	16937	68975	62086	54865		13869	17555	11228	24763	9411	23367	15230	34421	17654	19924	29589	27632	49293	6647	18088	12913	19491	11646	17390	13234	12615	8017	24361
837	36119	33425	22683	44880	19037	55762	43035	69002	33677	40913	58615	76491	128244	14800	57896	26359	49992	23967	40707	26550	27566	16761	70894	62869	55326		16193	14945	11142	24656	9176	23135	14697	34358	17476	19683	29239	28159	48696	6614	17587	12150	19467	11609	19006	12867	12776	8083	24968
838	37650	33314	22031	45038	18782	55979	43119	67863	34735	40386	57855	76303	127992	14679	56476	26115	49880	25924	41585	26626	27974	16716	69267	68677	55278		15366	16029	11100	24845	9297	22851	14993	33907	18004	19743	29524	28184	48526	6653	17735	12623	19878	11702	18696	13221	12769	7077	25079
839	36404	33686	22214	45277	18734	56446	43739	67617	35204	40219	58519	77720	125596	14596	54224	26163	51231	23773	41271	26982	27726	18336	69290	61945	49033		16079	16470	11151	24712	9486	22990	14819	34055	17095	20121	29200	27656	47945	6503	17716	12469	19845	11729	18827	12844	12827	8209	24393
840	48027	33187	22628	51687	18993	55938	43448	68298	35352	41163	58404	75987	125442	14712	57949	24652	52369	23363	41610	27243	27480	18398	69813	62026	49193		16163	16773	11157	24965	9531	23197	15248	34009	17977	19804	29526	27788	47839	6663	17613	12405	19635	11263	17238	12780	13416	8216	24865
841	45700	32417	21992	45126	19110	56251	43289	68236	34867	40240	58283	76500	127237	15010	57948	26123	53364	25925	40615	26447	27359	16764	68873	61777	49201		13817	17326	11136	24526	9558	23403	15211	33989	18199	20421	29274	28515	47897	6801	17740	12250	19767	11749	18716	13050	13033	7997	25087
842	41844	33107	22785	44402	18935	55805	43170	68288	32823	42603	58071	76158	126429	14547	57071	25842	53941	25780	41138	26171	25297	17965	69200	61224	49615		14002	17772	11389	24716	9619	22974	15020	34409	17829	19981	29975	28428	48042	6461	17539	11896	19720	11613	17225	12847	12973	8104	24482
843	41018	33454	22475	45138	19226	55293	43610	68503	37562	43476	57932	75847	126801	14643	56783	25795	53734	25249	40307	27076	26101	17017	69895	69549	49139		16174	15289	11333	24937	9097	23335	14704	34130	17430	19837	29012	27880	47850	6403	17639	11807	19507	11681	17786	12954	11718	8295	24741
844	41369	33248	22901	45116	19172	56178	46850	68415	34637	34856	58075	75831	126374	14713	56972	24174	54849	23179	41355	26661	25995	16552	68722	68908	48807		15990	16548	11657	24476	9434	22874	14863	33780	17609	19635	28953	27855	48367	6875	17972	12166	19590	11580	17803	12978	12267	7421	24722
845	42132	32869	22265	44909	19169	56138	43420	67569	37471	35163	57867	75653	126627	14927	56410	25327	53454	25158	40988	26584	26195	18311	69604	69067	48866		13766	16714	11566	24777	9219	16972	14967	33879	17682	20143	28908	27422	48988	6550	17282	12559	19447	11776	18163	12314	12195	8113	24896
846	40822	33537	22367	45046	18972	55546	43494	68741	37630	35135	57399	75318	128359	14803	57302	26454	54328	26299	40729	26592	26274	18086	68059	61922	48238		14063	15351	11318	24358	9404	16589	15159	34061	17849	20261	29483	28219	49069	6490	18055	12245	19310	11387	18125	12879	12605	8277	24389
847	45090	32754	22247	44980	19163	55179	43313	69303	36537	40698	58303	75769	104489	14852	57184	25803	54208	26197	41339	26700	26031	16126	68865	61711	59193		14657	15929	11253	24140	9314	22710	14666	33991	17522	20282	29832	27878	48826	6726	17502	11827	19749	11676	18021	12791	13228	8246	24879
848	44753	33382	22731	45553	19183	55983	43679	69852	37247	40736	57784	76035	111944	14285	57100	25826	53586	23365	40481	26534	25732	18267	67862	61158	49285		16133	15791	11231	23828	9404	22419	15064	33511	17883	19872	29780	27818	48492	6602	17603	12119	20165	11425	18468	13109	13652	8052	24605
849	43108	33450	22640	44949	19039	54524	42952	68798	37135	43130	58068	74717	116195	14436	56641	25493	53815	23919	40404	26410	25697	16488	68119	61133	49057		13545	16319	11311	24121	9304	22933	14963	33750	17469	19910	28936	27936	48510	6528	18013	12103	19441	11616	18113	12732	13475	8052	24817
850	41863	33081	22973	44958	19456	55019	43368	68907	37346	40813	57737	75009	113940	14764	57335	25388	53511	25565	40712	26622	27468	18280	68474	61706	48295		13501	16279	11097	23836	9139	16719	14963	33533	17536	20207	29684	27918	48311	6913	17597	12122	20478	11549	18651	13022	13266	8214	24518
851	44317	32934	22630	44765	18762	54714	43068	68998	36759	40554	57637	73844	106784	14528	57373	25650	52785	23519	40498	26723	27754	17993	68830	68833	48385		13607	16306	11029	24170	9038	22956	15017	33796	17540	20262	29725	27953	48628	6401	17757	12024	20683	11486	16894	13143	12987	8199	24518
852	46469	32960	22730	44192	18998	54479	42746	67862	37046	40830	56314	75108	101876	14633	57265	25455	51502	25580	41070	26461	28067	17246	67936	67882	50057		15471	17422	11025	24324	9567	16617	15035	33610	17467	22591	29755	28090	48448	6410	17790	12046	20763	11570	18526	12825	12126	8250	24617
853	43955	33356	22323	43216	19072	54619	43243	68080	36695	40175	56966	74232	122792	14737	57385	24863	49536	23634	40364	26492	28521	18153	67932	69320	50069		12975	14701	11110	24126	9663	22263	15128	33293	17772	20281	29860	27750	48913	6632	17502	12145	20677	11858	18293	13048	12086	7973	24763
854	44588	33783	22872	42311	18526	54920	43952	67926	37248	40691	57238	75334	116542	14928	56755	25088	48297	22617	41328	26999	26068	18348	68385	68256	54728		13261	15411	11452	24576	9658	22806	14969	33426	17498	20234	29415	27585	48209	6652	17607	12036	19565	11855	18248	12979	12769	8489	24566
855	44484	33054	22903	50730	19471	54212	43493	68457	37236	40432	56610	74706	114906	14251	56753	25434	48929	23680	40766	26715	25861	18397	68483	68878	54633		13843	15775	11058	24825	9251	16247	14935	33407	17486	20145	29433	27771	48254	6828	17746	11941	19014	11684	17515	12658	13058	8255	24483
856	49174	33025	23466	42864	19336	54112	43636	68307	36639	40263	56179	74865	111816	14910	55760	25647	47356	25479	41062	26404	28464	18243	67556	69459	54567		15415	15773	11208	24232	9418	16235	14812	33052	16955	19937	29803	27585	48131	6623	17517	11790	19112	11916	18513	12543	12820	8271	24502
857	51313	33459	23125	50770	18857	38296	47740	68751	36513	40303	47455	74596	114169	14560	55078	24501	48201	25160	40736	26783	26109	18360	67312	68491	55095		12972	16316	11385	24478	9205	16290	14900	33295	17890	19654	26448	28052	47998	6529	17919	11904	18955	11838	18631	12551	12725	8009	24493
858	50317	33372	22672	43131	19243	53939	48245	67652	36917	40802	56468	73882	117805	14356	55263	25067	47929	23230	41088	26236	26595	17831	67879	69229	54963		13676	17191	11337	24673	9490	16528	14997	33044	17742	19993	26222	28197	48470	6785	17621	11821	18923	11835	18413	12798	12444	8017	24561
859	49170	33328	23097	43621	19408	37660	46614	67943	36987	39604	57166	74889	122472	15039	54516	24743	47855	25181	40620	26358	28192	16947	67588	68849	54702		13747	16208	11580	24706	9375	16240	15044	32941	17159	19618	26101	27857	48340	6713	17845	12144	19278	11409	18713	12879	12869	8490	24936
860	46819	32704	21501	43991	19318	38245	47746	67983	36797	39933	56153	74034	119892	14859	55085	25190	47918	23462	40646	25879	26427	18152	67888	68551	54135		13951	15019	11220	24192	9346	22419	14680	33095	16526	20022	26674	27742	48827	6577	17623	11231	19032	11590	18391	12617	13061	8072	24216
861	47276	32483	21899	45215	19137	53942	47057	68921	36796	39495	56978	74095	116529	14720	54819	25161	47632	23700	41653	26040	26326	16521	68325	68883	48557		14500	17375	11240	24384	9465	16281	14806	33155	17819	19699	25883	28130	48657	6587	17358	11723	19209	11726	18341	12501	12726	8459	24422
862	50195	33224	22298	44812	18760	54288	42958	68187	37355	40022	57273	73204	113296	14544	54192	25050	47028	23192	41619	25935	28471	17003	68248	68810	48713		14046	17644	11312	24224	9390	22086	15290	33078	16961	20066	26582	27997	47940	6459	17791	12033	18295	11902	18379	12814	12832	8144	24593
863	49063	32862	22115	45252	19044	54686	43200	68583	36678	40020	57443	74189	107197	15208	53884	24664	47394	22854	41751	26392	26046	16766	67414	69187	48302		14574	17351	11251	24095	9736	16124	14772	33110	17450	20361	29408	31388	48238	6455	17118	12102	18771	11774	18358	12438	12790	8516	23506
864	49647	33170	22659	44858	18854	55034	43562	68197	36820	39939	57091	73902	107156	14822	53675	25295	47533	25205	41487	25996	28206	16812	66829	69520	48165		15332	17361	11044	24186	9465	16824	14512	32827	17340	20035	26674	27444	48342	6678	17143	11988	18742	11406	18518	12803	12893	7933	24075
865	51811	33158	22469	51276	18885	54638	42885	68103	35917	39938	56873	73967	106734	14926	52373	25167	47802	22991	41136	26203	26755	17004	66131	68965	48324		12654	16847	11041	24330	9647	16576	14897	32755	17348	19721	26211	27715	48066	6638	16968	11249	18854	11429	18476	12818	13147	8262	24461
866	49254	32196	23567	45370	18941	54747	46658	67653	36271	39933	56804	72899	109230	14858	51694	24678	47089	22973	40734	25451	26646	17303	67067	69298	48676		14272	17052	11532	23291	9534	16385	14652	32686	17300	22516	26479	31271	47629	6861	16866	11883	18853	11714	18116	12778	12665	8169	23896
867	44423	32730	22763	44547	19260	53610	43135	67936	37194	40133	57194	73519	110346	14620	52217	22544	47465	24965	41078	26356	26827	17169	66502	69751	48175		15056	14546	10895	24338	9401	15457	14662	32420	16992	19939	26295	27142	48144	6802	17352	11827	18876	11329	18057	12962	12793	8127	24220
868	44926	32861	22343	44916	18549	54288	47412	68160	36768	39708	57106	72432	112937	14732	52049	24958	46539	25617	39709	25547	26634	16679	67338	68950	48159		15057	14908	11367	24125	9204	17837	14950	32755	17217	20001	25887	31065	48325	6559	17456	12103	19393	11808	18117	12623	12478	7960	23861
869	43849	32669	23452	45440	18912	38431	47253	68131	36253	41365	57059	73335	114079	14866	52756	24386	47365	23058	38980	25701	27139	17111	67507	68134	58582		12845	15541	10987	23881	9218	17196	14883	32913	17143	19767	26617	31398	47918	6599	17296	11261	19148	11317	18066	12632	12706	8292	24275
870	45524	32451	21929	44880	19042	54422	47094	68480	36537	40537	47882	73269	113934	14689	51251	23521	47067	23403	38991	25683	26081	17186	66507	68586	47821		13676	16311	11388	24396	9342	17362	15056	32113	17522	19800	26107	27338	47323	6516	17870	11849	18765	11195	18183	12149	12953	8303	24488
871	45170	32522	21828	44696	19064	54671	46739	68226	37163	40608	57341	73201	110392	14806	51595	24103	46993	24862	39795	26227	26213	17295	66974	68736	48322		13659	16287	11281	23831	9491	17405	14823	32412	17987	22468	26762	27142	47889	6448	17256	11736	18737	11651	17966	12469	13094	8140	24018
872	43385	32487	21788	44914	19303	55520	43082	69262	36733	39843	57218	72906	111634	14846	52732	24113	46938	24774	39257	26506	26802	17981	65631	69108	48615		14498	15969	11156	23818	9275	17509	14541	31963	17291	22231	26824	27866	48382	6592	17631	11656	18822	11713	17789	12268	12311	7709	23993
873	44482	33195	22999	44665	18745	54735	43222	67737	36758	40189	56914	73253	109635	15032	50867	24829	45998	22964	38368	25812	26367	18374	66141	69352	48037		13481	14506	11395	23783	9267	15945	14927	32643	17401	20220	26815	27768	48096	7018	17647	11612	18346	11419	18083	12399	12782	8015	23946
874	47038	32486	22130	44160	18994	54267	42661	67597	37227	39714	57572	72957	114435	15038	52180	23897	46736	23082	39438	26002	28074	16084	66026	68472	48213		13910	16923	10849	23510	9336	15540	14891	32597	17325	22106	26642	27644	47430	6577	17639	11866	18111	11323	17930	12471	12857	7983	24473
875	47343	32238	22176	44382	18534	53119	42496	68292	36073	40130	47508	72950	110330	14832	50891	24254	46211	23374	38748	25660	26292	16712	65806	68530	48162		14159	16707	11311	23590	9299	15807	15321	32400	17687	19656	26410	28261	47377	6376	17613	10706	18534	11872	18302	12659	12593	8072	24004
876	44240	32647	23069	44787	18866	52790	43470	67697	36417	39745	57498	73023	107583	14564	50917	23979	45851	23537	38901	25941	26636	16370	66561	68798	47195		13133	16781	11055	23675	9227	15768	15149	32190	17578	19613	26514	27789	46830	6182	18008	11345	18334	11357	17630	12176	12787	8235	24392
877	43905	33370	23282	44161	18999	52748	42355	67163	36274	40107	57062	72586	105549	15003	49584	23896	46048	23146	39723	25862	26591	16969	66646	68828	47551		13386	16634	10970	23508	9270	15850	14810	31895	17285	22196	26557	28245	47332	6731	16994	10907	18642	11665	18629	12502	12762	8192	23993
878	44960	32772	22510	45207	19204	52754	42984	68327	36138	40143	56858	72759	103831	15227	49770	24026	45919	23389	38823	25367	26968	18433	66037	69089	48920		14257	16552	11062	23651	8936	16137	15392	32170	17275	20074	26016	27908	47802	6471	17098	10822	18955	11412	18104	12538	12933	7675	23812
879	44069	31894	22104	44314	18207	52627	42630	67935	36752	39126	57211	71844	101984	15225	50115	23999	45581	23217	39338	25624	26843	18114	65448	68145	48535		13352	16632	10810	23470	9303	16312	14904	32014	17230	19467	26380	27421	47543	6693	17500	10915	18580	11474	17561	12492	13199	8234	24287
880	44221	32310	22868	44257	19108	52608	42039	67453	36622	40454	56689	71341	100522	15051	50248	24443	45486	25562	39199	25798	27440	16577	66647	68851	48100		14321	16905	11213	23353	9327	15920	15273	31968	17321	19829	25912	27544	47493	6555	17003	11553	18631	11666	17632	12867	13050	8086	24058
881	43173	32070	22866	45446	18999	53900	42790	68455	36815	39743	56385	72075	100138	14745	49809	23878	45970	24988	38915	26354	26697	17115	65258	69504	47467		13662	16849	11343	23538	9518	16079	15036	32024	17401	19422	26187	27271	47440	6777	17251	11911	18428	11877	18030	12616	12891	7882	24159
882	42110	31971	22323	44523	19091	54197	43174	67460	36196	40200	57291	72414	99225	14958	49661	24622	44824	25249	39361	26839	26806	16735	65192	69074	53693		14122	16937	10857	23761	9188	15981	15030	32055	17069	19949	26127	27926	46636	6585	17263	11134	18397	11496	18053	12946	13025	8026	24553
883	43866	31168	22234	44819	19146	54891	46995	68735	36766	40363	56683	72891	99596	15229	50700	24474	44975	25425	38732	26963	26303	17148	65177	68055	53466		13395	17004	11026	23543	9440	16406	14974	31692	17176	19367	26121	27210	47392	6532	17271	11601	18806	11522	17653	12846	12602	8068	24382
884	44077	33280	22513	43869	18830	54624	46590	68950	36520	39437	56532	71982	98767	14836	51104	24238	44848	25095	38645	27715	26640	17104	65010	68476	54096		14380	14589	10676	23596	9136	16068	14828	31268	16904	19641	26593	27717	47148	6369	17222	11580	18666	11391	17997	12637	12985	8255	23955
885	41374	32939	22224	45377	18529	53994	50573	68723	36884	39558	57095	71878	96493	14683	50482	24989	44630	23397	39184	28142	26658	16103	65154	68498	53590		12770	14796	10811	23409	9073	16062	15177	31808	17509	22290	26155	28158	47400	6773	17454	11795	18609	11490	17665	12593	12491	8004	24000
886	45137	32926	22460	43834	18875	53763	46610	66864	33371	39646	56014	71941	92136	14674	50249	24098	44940	24998	39241	27647	26745	14505	65312	69078	52912		12816	14996	10755	23603	9099	15936	15359	31468	17090	19534	25992	26945	46949	6342	17526	11609	18641	11408	17791	12786	13196	7931	24397
[truncated: 963 more rows]
[truncated: 208 more columns]

## Sheet: AWAChr;AWAGC RespondVNonrespond
Figure 1S-1E
AWA::GCaMP2.2b F(A.U.)
[truncated: 4,253 more rows]

## Sheet: AWAChr;AIAGC to dia
Figure 1S-3C
[truncated: 305 more rows]
[truncated: 479 more columns]

[truncated: 2 more sheets: AIA compare pulses, AIA Thresholding]
