# Supplementary material for: Reliability of an interneuron response depends on an integrated sensory state
Source: eLife. 2019 Nov 13;8:e50566. doi: 10.7554/eLife.50566 (PMC6894930; doi:10.7554/eLife.50566)
Supplement: Figure 2—source data 1. [file elife-50566-fig2-data1.xlsx]

## Sheet: WT, odr-7, odr-10
Figures 2A, 2B, 4S-2D
AIA::GCaMP5A F(A.U.)
Stimulus:	1.15 µM diacetyl
Genotype:	WT
N:	1	2	3	4	5	6	7	8	9	10	11	12	13	14	15	16	17	18	19	20	21	22	23	24	25	26	27	28	29	30	31	32	33	34	35	36	37	38	39	40	41	42	43	44	45	46	47	48	49
Frame (Pulse at 100)
1	683	642	888	1178	473	592	1053	416	1142	498	685	436	1143	625	404	519	717	607	583	548	394	572	590	1101	999	580	282	1021	485	1066	537	641	461	1104	591	420	560	518	499	1152	509	432	874	887	449	644	747	1487	1938
2	915	646	1024	1214	566	369	840	370	868	441	776	432	1116	699	304	487	607	1052	637	555	467	555	562	873	833	460	458	892	421	1262	501	663	411	1182	762	435	775	643	643	1090	437	365	990	905	610	763	947	1442	1774
3	662	612	922	1213	578	606	790	453	1033	605	639	442	1083	667	287	624	617	885	714	635	399	615	549	951	1091	534	476	1015	522	1197	582	787	406	1075	716	640	569	520	738	1190	452	520	950	855	445	864	828	1491	1118
4	558	829	960	952	742	433	846	472	1070	437	633	319	1048	482	436	420	651	934	530	629	425	519	664	1005	1055	618	362	982	794	1139	445	767	448	1052	656	465	581	579	760	953	455	454	1074	820	479	684	931	1448	1347
5	666	711	869	990	484	544	908	554	1037	467	687	381	1520	636	464	741	674	597	494	527	473	613	545	1028	1065	582	581	1136	417	1110	539	626	426	1072	766	493	606	656	680	1067	417	410	1025	852	426	633	929	1445	1229
6	853	634	938	1025	359	456	861	582	1014	542	654	384	1319	638	381	561	675	815	462	627	463	630	514	969	957	547	551	754	554	1206	527	689	288	1153	725	489	600	528	652	959	357	296	1010	736	460	824	900	1409	1121
7	706	740	1010	1210	565	463	952	663	1043	396	569	317	1073	613	392	743	781	884	738	587	538	652	651	965	1034	563	556	1028	498	1225	501	658	437	1134	525	532	599	704	523	1118	457	326	941	805	439	750	812	1500	1258
8	762	640	991	1049	517	562	846	716	1189	525	669	471	1178	619	403	485	772	900	573	660	486	734	635	1072	1071	641	456	796	618	1076	433	748	454	1090	631	480	565	543	699	1158	271	431	990	825	510	874	935	1395	1194
9	814	624	1116	1053	658	439	813	488	1125	516	656	306	1072	619	395	572	654	835	622	549	492	681	598	1026	1227	527	454	1029	536	1101	437	592	361	1010	552	381	698	591	806	1149	397	303	911	769	545	829	950	1351	1222
10	604	598	1037	1036	370	525	887	446	974	389	569	486	1067	800	448	573	648	1008	569	631	338	647	659	1032	937	589	546	942	473	1121	361	750	368	1254	573	541	635	569	634	1091	335	423	804	995	433	794	943	1530	1116
11	725	661	1027	1083	460	534	828	493	977	575	706	403	1033	611	453	388	761	624	500	512	466	478	614	983	1109	557	422	921	563	1074	413	677	456	1198	601	505	424	538	747	1089	287	440	1027	737	397	778	972	1488	1229
12	687	650	1146	1108	489	527	987	557	1143	489	624	381	1302	546	373	608	590	966	623	487	430	546	557	1170	1097	436	469	1019	489	1000	488	636	477	1050	749	574	700	449	733	1036	628	549	927	856	511	810	784	1521	1227
13	741	635	1052	1152	644	485	840	430	1059	458	653	273	1185	640	368	528	768	963	581	649	446	517	600	943	897	519	418	1032	550	1062	508	596	352	1099	693	440	441	711	716	1015	381	442	1004	863	355	756	842	1396	960
14	675	637	1022	1168	668	458	762	434	988	567	635	411	1166	604	588	549	606	1000	663	475	390	665	616	1019	998	405	638	925	429	956	396	685	552	1063	650	488	430	608	678	1053	424	401	1050	903	412	777	897	1508	1152
15	622	694	934	1025	563	495	936	724	1029	413	697	342	1331	607	476	619	671	695	603	514	241	576	409	1017	1195	499	423	1089	389	1015	299	678	419	973	565	319	638	704	631	1020	475	412	1012	808	516	794	937	1345	1212
16	801	561	1086	1223	453	456	766	545	904	593	611	390	890	650	444	575	749	940	599	318	511	615	567	1078	995	581	335	845	420	1098	580	719	326	1095	680	398	597	514	672	1177	390	436	1112	775	402	763	870	1584	1182
17	706	753	996	1186	714	458	943	624	1057	591	491	442	988	683	484	342	840	639	637	456	385	632	498	927	986	574	539	1150	500	1076	586	696	405	1049	776	363	378	479	659	1054	447	407	903	735	481	797	884	1471	1177
18	626	600	996	1314	645	494	874	575	1015	594	781	333	1112	674	454	693	573	1048	510	359	475	543	646	1033	1091	498	489	796	490	1078	348	743	414	1118	569	464	541	496	597	1138	513	476	944	834	492	606	989	1560	1124
19	657	691	954	1000	711	437	750	519	1083	569	558	336	1153	563	505	674	694	1026	668	320	444	604	479	1051	919	546	488	1017	521	970	446	803	579	1150	615	362	759	600	709	1143	493	405	861	798	314	767	896	1525	1105
20	779	679	1063	1253	527	419	842	485	1086	539	707	505	1206	649	490	585	595	1003	588	438	638	703	549	1134	1089	445	346	1062	498	998	366	638	467	995	613	440	689	665	803	916	406	440	1004	870	493	765	987	1485	1101
21	842	602	997	1056	644	440	810	381	918	505	625	460	1084	734	528	689	761	980	707	520	453	593	735	949	879	551	464	954	455	951	315	642	412	1281	701	455	498	523	768	1160	583	472	956	776	290	634	875	1548	1163
22	632	638	981	1047	434	493	865	311	1175	501	681	382	1041	577	409	703	672	648	573	583	342	586	655	1108	962	568	507	1018	494	1008	568	771	398	1108	804	367	582	513	659	1003	385	261	809	834	514	717	806	1559	1126
23	729	606	925	1219	548	465	867	581	876	511	675	289	1243	554	366	474	599	1049	438	359	361	665	529	1073	906	551	480	1069	493	1139	505	649	438	845	610	405	608	615	843	1022	452	368	800	695	420	741	801	1499	1175
24	810	638	912	981	611	479	842	468	1203	556	609	467	911	704	390	634	672	1047	697	351	436	665	558	1034	983	569	357	929	463	868	416	622	383	1042	480	435	602	647	671	1109	568	476	664	785	450	650	1011	1581	1088
25	723	622	965	1161	548	355	926	672	1012	534	518	261	1323	581	447	503	628	687	670	443	657	433	681	1149	953	604	333	1078	436	1030	590	774	407	1028	673	580	545	503	750	1147	661	379	808	704	463	729	790	1521	1234
26	690	460	940	1071	626	631	891	696	1036	497	819	465	1232	604	501	741	841	1090	781	417	372	544	528	956	1145	595	527	983	417	1044	476	681	369	1280	582	365	492	634	430	1033	439	451	814	759	422	766	875	1597	1041
27	695	588	1095	1118	385	490	828	631	1136	564	639	316	1123	653	390	548	695	1008	482	494	402	669	483	1048	1024	603	424	810	503	949	387	605	404	1114	706	407	579	553	723	1087	442	432	839	773	445	632	857	1487	1161
28	831	637	1045	1166	530	342	852	409	994	490	683	421	1001	672	287	499	672	589	515	489	388	587	598	982	1061	643	512	1053	518	1054	509	585	346	1132	674	397	438	558	599	1081	441	240	856	938	495	738	1009	1585	1417
29	854	623	924	1161	472	473	946	470	1083	508	738	462	1189	670	272	492	735	910	601	427	393	612	664	953	1016	499	373	996	433	1146	460	743	482	1067	610	316	434	625	664	1096	525	332	884	778	465	880	935	1370	1090
30	799	533	1101	1181	532	455	838	424	1088	544	800	389	1347	809	382	553	780	954	530	426	395	533	538	1135	1037	606	465	961	383	903	394	656	375	1124	675	348	570	598	676	1100	449	413	767	812	274	789	959	1539	1080
31	792	611	906	976	564	530	846	522	895	639	762	400	1166	465	291	460	612	1030	482	542	382	450	617	1015	973	445	443	843	493	1037	653	617	399	1168	775	332	503	654	864	1147	597	573	691	756	501	628	900	1563	1209
32	804	685	1072	1078	584	459	989	442	993	469	727	354	1177	623	465	524	774	1093	612	450	267	565	595	969	1179	567	360	907	506	1072	533	621	379	1183	648	453	606	601	761	860	506	428	742	770	365	753	1011	1504	1170
33	700	559	1025	1314	566	504	962	517	1023	432	716	386	1191	681	439	606	581	1104	590	620	495	485	555	949	891	402	482	940	595	1187	376	692	409	1169	694	298	644	682	773	1020	658	487	799	727	442	714	1024	1535	928
34	823	680	1008	1192	443	511	908	780	1027	517	691	388	1223	689	540	511	612	1020	596	591	510	510	547	950	878	327	351	878	410	1136	408	723	396	1275	770	420	530	532	684	1162	555	410	785	788	427	704	842	1499	1270
35	746	706	974	982	456	486	1010	719	1172	494	704	390	1235	629	503	637	776	992	641	471	475	603	508	937	977	485	494	1039	464	958	488	735	365	1006	663	424	566	664	605	1011	416	315	856	825	388	689	852	1564	1173
36	807	700	978	1154	404	444	974	418	1130	377	788	400	1340	701	391	449	647	914	634	472	405	517	550	1102	1007	578	428	1058	467	1308	276	734	321	1009	646	473	550	594	600	1154	351	428	743	858	354	703	773	1516	1145
37	760	620	876	1051	600	477	868	784	1260	480	668	328	1296	531	401	695	759	505	617	586	499	541	594	1027	1153	472	484	1107	453	1148	487	607	287	1199	740	366	649	675	719	1083	400	346	943	843	470	682	820	1632	1046
38	721	590	941	1231	443	332	970	680	1056	578	781	266	1336	626	397	721	769	1010	688	679	476	691	615	1101	1000	490	359	1094	554	1089	616	689	493	1255	614	400	672	549	722	1055	533	455	750	885	246	699	859	1693	1074
39	849	728	874	1168	559	400	816	599	1184	480	651	328	1176	574	457	393	734	896	602	366	441	529	527	1103	1041	481	356	1083	367	1025	351	659	419	1221	623	444	480	506	813	1107	400	415	794	841	570	711	753	1492	1113
40	717	521	1007	1169	549	461	1035	583	1095	495	738	426	1273	683	421	603	840	973	490	411	443	580	562	947	976	585	564	817	534	1168	373	736	357	1238	880	421	646	590	479	898	333	528	809	673	426	687	1053	1463	1156
41	765	488	1114	1129	498	489	830	332	1048	442	704	426	1281	681	551	446	726	415	569	595	355	593	475	1176	990	575	421	959	565	959	573	548	323	1135	580	583	539	654	633	1101	447	339	753	915	561	668	758	1637	1116
42	748	741	1032	1124	487	451	805	288	1124	504	661	364	987	674	522	674	694	842	656	566	364	599	558	1098	933	647	394	876	511	1040	368	769	373	1246	623	415	520	602	680	1117	477	393	778	766	455	588	890	1481	941
43	744	673	1002	1001	543	483	1057	723	1164	584	734	344	1332	546	425	533	497	959	676	471	565	639	652	1021	1015	589	390	893	470	1004	545	508	359	1109	537	314	653	579	644	1011	461	478	772	812	475	638	913	1514	1089
44	807	669	900	1174	562	469	920	611	1117	506	703	334	1233	685	344	531	791	882	590	518	542	558	451	1063	981	491	467	1171	578	1088	491	738	457	1317	632	356	476	452	644	950	603	374	799	685	442	707	823	1463	1027
45	877	501	1173	1158	538	396	962	810	894	425	746	441	1204	671	409	479	676	836	539	415	450	673	519	1054	1092	330	506	1080	544	1054	483	461	474	1178	697	540	584	577	637	1072	385	482	645	826	451	685	816	1485	1006
46	838	678	935	1083	467	440	906	608	1150	532	587	495	1037	601	492	566	710	606	648	451	481	628	548	964	962	420	489	934	542	1113	465	583	389	1224	585	390	584	475	611	1115	362	429	675	786	362	683	924	1446	1044
47	641	722	1102	1120	500	460	961	445	1110	489	578	364	1140	712	443	539	774	1063	537	592	428	597	500	1068	907	618	490	905	347	1103	371	627	365	1127	594	373	506	689	709	1131	554	454	752	850	533	747	832	1695	1133
48	839	585	973	843	569	386	889	752	1022	499	538	421	1041	710	487	286	697	971	453	435	465	555	560	977	924	481	514	861	549	988	490	640	481	1032	656	405	551	615	637	986	570	223	899	699	370	538	774	1481	909
49	938	664	1044	1053	539	416	886	559	985	565	640	440	1134	585	396	627	691	948	559	400	464	570	499	978	1185	523	443	830	437	982	525	650	301	1116	726	423	449	523	697	1139	473	313	764	839	372	844	813	1558	1246
50	877	720	927	1010	437	413	836	660	1108	471	579	361	1085	591	500	496	704	602	710	431	392	608	539	1188	1059	321	448	945	497	989	312	700	440	1149	744	530	620	691	755	1135	642	277	942	828	434	589	828	1455	1331
51	809	610	1059	921	480	550	812	474	1113	512	674	319	1345	563	488	503	669	904	561	450	331	651	474	1107	991	521	274	1100	463	1068	484	517	260	1128	698	472	588	521	834	1108	633	419	837	879	374	592	710	1564	1124
52	565	611	768	1152	574	412	847	698	926	396	838	347	1087	630	428	456	718	1044	520	579	580	623	560	1051	1021	486	428	1159	487	1042	517	755	366	1115	686	277	722	631	644	1113	486	455	673	755	366	604	933	1504	1303
53	473	545	981	1168	635	489	925	728	1142	562	675	448	1230	674	514	495	668	912	622	565	433	594	604	1033	1034	410	418	778	646	1077	427	645	510	1041	580	396	551	511	759	1108	496	322	746	686	491	694	676	1499	1206
54	585	468	1078	1234	647	297	770	569	994	506	671	382	1242	606	407	617	721	976	530	376	450	596	630	1040	991	453	521	996	524	1010	464	762	358	1183	680	492	526	514	765	1217	329	393	777	739	390	521	588	1569	982
55	666	527	978	1075	544	465	939	760	1092	498	718	340	1301	611	470	557	790	840	604	506	471	651	535	1104	862	408	531	1105	447	1022	430	603	382	1026	583	263	540	667	779	1136	584	447	757	816	517	669	788	1649	1194
56	614	486	1144	1122	510	413	748	624	1106	678	761	429	1199	692	463	548	706	1083	613	471	527	723	667	1123	1066	574	415	924	428	975	498	792	374	1071	683	363	623	791	641	1030	392	414	730	819	486	709	679	1648	1031
57	681	633	948	1179	559	494	959	516	1264	428	679	321	1321	587	392	577	679	973	461	515	411	515	592	1064	974	534	529	974	512	971	442	653	411	1081	651	419	513	705	776	1099	515	353	773	757	453	515	787	1642	1055
58	609	669	1021	1069	490	337	660	637	1125	553	754	272	1262	677	456	607	710	1071	576	344	383	566	571	992	1082	684	397	1011	530	1043	371	721	426	1003	818	365	586	494	686	1132	570	340	707	798	486	583	827	1702	1067
59	634	508	908	1363	392	464	994	832	913	311	687	392	1201	596	496	485	620	1033	604	507	471	547	488	1162	1032	525	415	1004	421	1060	431	686	513	1063	575	415	658	688	655	1250	463	300	891	730	410	684	698	1447	1057
60	616	615	937	1120	423	399	834	622	1147	519	735	311	1236	578	419	572	624	997	625	505	360	557	404	1051	1075	457	416	1092	597	1234	567	672	427	1085	527	428	500	602	875	1103	461	376	867	760	445	592	869	1558	1144
61	673	548	949	1222	671	410	967	628	1060	561	749	374	1133	518	381	485	704	654	681	430	420	649	564	1133	1123	545	331	1023	463	1042	534	581	394	1024	747	308	570	642	719	1163	413	454	723	912	614	697	930	1754	1191
62	638	527	1078	1085	600	355	780	733	1038	487	575	452	1232	653	491	642	677	1068	572	525	429	577	613	1086	1067	586	404	859	575	957	426	593	336	1143	690	400	586	593	555	1064	444	294	853	765	456	781	709	1643	1032
63	646	683	1049	1082	641	530	766	633	1127	435	735	391	1230	572	483	548	442	951	502	591	566	621	464	949	965	514	412	823	520	1092	485	671	300	1131	598	440	514	688	619	1161	383	413	829	787	502	638	950	1617	1107
64	575	716	883	1108	522	452	875	580	997	553	631	317	1354	585	460	516	554	1058	409	673	453	697	617	1129	1206	547	380	889	474	1211	484	582	252	1304	565	401	503	593	583	1230	503	400	745	1096	433	685	704	1647	1093
65	601	596	1032	1239	528	414	716	604	1149	493	710	331	1021	720	472	521	613	872	708	553	349	560	489	1056	1037	533	511	711	435	1036	548	655	428	1094	668	491	536	578	676	997	527	415	917	723	407	737	904	1758	1182
66	682	669	1025	1006	573	571	760	546	1048	461	795	362	1187	820	470	497	749	909	478	535	456	620	584	1124	975	493	434	800	484	1193	533	781	364	992	638	380	501	686	594	1061	479	326	864	891	372	734	919	1553	1172
67	718	619	802	1181	719	504	822	598	1126	557	658	407	990	510	339	673	827	985	570	458	575	525	629	1078	1062	562	446	928	440	1045	342	610	365	1050	693	397	498	555	639	1048	626	428	769	802	493	763	808	1684	1065
68	564	578	962	1286	466	445	798	604	1105	431	689	429	1121	661	408	598	741	890	638	431	441	558	591	1139	910	489	501	992	556	1119	432	743	431	1089	674	408	549	618	731	1216	505	509	896	800	507	708	785	1735	1014
69	585	564	1144	1084	505	360	1006	708	1146	502	638	364	1199	547	449	495	694	895	449	406	686	571	495	1040	1127	437	512	941	643	1088	450	604	332	1207	669	355	660	610	703	1008	522	623	836	801	441	742	814	1616	1099
70	704	541	930	1068	361	355	903	709	1014	521	646	417	1150	618	503	501	608	933	616	424	498	488	609	1051	1000	617	409	870	550	1052	422	661	306	1187	732	331	532	434	703	978	444	440	779	726	420	692	708	1682	1298
71	721	671	991	1272	393	414	941	480	966	501	603	381	1273	655	418	573	797	1030	658	436	516	586	513	1155	1016	452	515	1003	461	1028	563	570	448	1188	666	434	693	406	636	1017	506	390	792	853	474	785	783	1589	1126
72	711	708	810	1017	639	459	837	685	1180	462	827	381	1043	567	267	651	538	647	539	426	390	533	530	1142	1146	636	360	874	554	960	604	618	403	1142	762	458	519	611	753	1153	487	304	784	743	462	816	895	1687	975
73	627	679	1084	1161	640	291	1085	721	1020	403	741	448	1274	686	498	548	739	1044	625	544	511	623	529	999	1041	472	492	789	617	890	641	674	340	1073	771	466	527	673	657	1052	489	494	838	744	350	674	845	1488	1264
74	612	761	973	1324	384	427	884	642	1016	414	652	362	1160	603	430	538	630	864	626	587	400	578	652	1006	947	515	372	1031	459	1032	352	847	356	1024	769	487	447	710	673	912	349	615	955	730	483	713	766	1560	1236
75	633	606	871	1184	432	377	1083	629	1166	513	785	407	1079	468	342	379	623	876	738	386	522	517	562	1050	1108	605	496	839	457	1032	384	604	385	1079	691	351	524	585	582	1003	627	360	912	676	384	844	774	1615	1092
76	686	618	967	1089	566	468	818	643	976	299	587	288	963	566	348	482	609	1075	382	576	512	588	668	1025	933	687	492	880	423	922	479	752	362	1178	640	346	615	564	770	1082	424	424	854	859	321	775	878	1601	1275
77	569	704	888	1008	353	450	859	733	1090	545	668	438	1153	544	369	577	593	1020	763	506	438	503	552	1038	1034	532	421	735	579	1152	556	643	399	1097	625	431	585	528	779	1185	514	468	895	924	295	769	939	1722	1053
78	628	682	1009	1164	443	418	929	497	1095	509	909	385	1231	632	362	617	610	924	568	509	469	491	597	907	997	413	467	819	605	1158	488	634	413	1018	747	261	456	558	640	932	469	369	832	771	328	838	890	1441	1220
79	683	638	1146	1222	502	477	869	612	1199	502	666	360	1319	549	399	532	589	1114	677	619	495	571	588	1016	976	512	477	919	563	1007	552	672	344	1156	705	414	452	652	612	981	572	556	817	757	468	842	867	1668	1058
80	665	540	978	972	517	523	1041	562	1033	594	833	329	1072	512	435	668	446	1004	564	391	367	573	594	1023	899	417	326	907	488	1026	478	781	400	1178	716	474	764	534	687	1020	586	392	864	805	354	716	755	1562	1108
81	621	548	970	973	537	537	817	664	1010	370	686	503	1003	574	423	712	796	1007	672	433	481	439	655	873	1055	497	403	952	471	1056	452	765	418	1213	647	342	637	467	683	1015	516	492	872	735	551	889	832	1555	1067
82	578	725	955	1065	412	594	844	513	909	481	658	508	1135	513	326	731	639	613	597	489	446	589	471	1020	981	517	343	853	446	1103	407	684	366	1087	714	471	504	563	700	1036	579	491	879	803	505	862	934	1493	1130
83	654	580	1010	998	476	536	975	653	1130	576	788	394	1081	508	251	383	606	615	683	467	492	555	634	1010	973	396	356	829	447	1028	426	590	454	1252	719	477	598	586	566	989	446	338	891	832	459	708	899	1631	1222
84	555	524	1008	912	662	463	871	641	1067	455	649	366	1171	658	324	382	621	1092	552	484	534	525	687	1025	1184	449	462	964	551	1158	520	754	442	1178	624	303	601	569	706	1137	601	517	776	784	305	928	792	1509	1095
85	554	566	1037	949	468	552	830	610	1062	456	622	468	1102	491	382	739	713	1037	729	552	411	606	528	999	1119	718	294	916	517	1039	417	650	345	1181	717	459	615	564	552	1134	505	343	904	836	516	637	669	1495	1132
86	640	641	958	989	606	480	939	504	1130	493	740	300	996	618	389	598	727	1031	543	587	393	570	506	1081	1252	599	458	752	669	1023	333	806	426	1152	740	429	754	679	476	949	490	578	821	766	553	864	966	1552	1230
87	679	683	899	1197	617	358	919	740	1218	418	691	386	1174	634	453	470	788	663	670	430	563	470	655	912	987	510	361	935	561	1085	659	749	470	1118	679	395	633	664	634	845	626	455	932	808	406	804	763	1652	1161
88	615	650	1043	981	558	570	757	503	1089	470	831	354	1212	597	404	713	693	1086	610	497	442	510	551	1045	1044	549	375	806	524	1159	359	817	319	1039	589	396	600	596	717	1039	528	410	747	761	284	998	923	1596	1393
89	571	580	1033	1251	490	381	924	700	1147	543	710	380	1173	475	378	745	702	1102	542	524	376	563	630	968	941	522	356	840	578	1085	451	666	346	1208	707	401	544	632	604	1119	515	316	716	725	491	814	935	1422	1221
90	632	685	978	1153	613	497	969	483	1042	424	636	452	1248	590	353	531	546	1108	587	513	530	600	414	820	1092	691	551	915	548	988	479	694	424	1219	722	422	392	593	737	1015	397	300	634	833	521	735	891	1634	1281
91	605	639	1093	1114	410	495	800	649	1190	493	740	379	1065	649	278	498	674	651	682	459	521	538	640	953	1038	607	299	855	452	1140	546	731	385	1114	536	440	374	614	760	985	465	455	852	853	443	848	843	1446	1135
92	691	661	995	956	539	463	888	611	1156	595	774	460	1174	553	432	603	524	1083	638	294	401	529	613	1051	965	582	347	1002	484	1124	512	718	423	1133	666	427	648	435	721	1093	446	540	619	944	433	801	908	1420	1294
93	570	721	896	907	666	591	871	614	1068	468	680	252	1136	666	396	509	638	642	648	558	388	587	622	892	920	632	412	863	513	1115	612	718	402	1214	710	480	702	466	629	1066	521	339	810	843	510	840	722	1468	1261
94	520	624	1009	965	462	464	863	699	1096	484	688	352	977	718	361	526	631	1125	575	558	406	486	543	1117	1028	500	409	735	550	1168	516	664	363	1339	704	435	658	559	786	1017	487	532	765	838	471	910	661	1527	1274
95	748	691	1118	1022	471	430	747	608	1163	386	643	331	1054	701	414	450	681	1021	614	443	631	575	627	964	1052	465	432	880	488	1091	464	644	328	1139	562	376	599	489	602	1033	503	350	660	747	575	797	719	1715	1235
96	658	518	1126	915	616	314	920	558	1162	470	698	368	1106	665	392	476	537	752	691	606	505	658	510	1056	1049	581	476	900	506	1147	347	819	416	1268	653	424	583	706	653	1063	506	266	730	841	426	742	795	1490	1321
97	540	661	1009	1044	618	518	926	568	1076	493	646	405	1102	694	442	390	767	999	604	556	508	556	514	1029	1056	517	314	883	539	1062	510	711	455	1196	754	482	396	484	773	1036	566	448	597	747	621	859	842	1623	1369
98	594	527	881	1161	355	405	829	618	1120	551	697	322	1051	624	474	666	692	1080	638	531	487	640	572	1099	1052	421	561	895	457	953	567	695	392	1252	753	483	506	663	838	1026	550	396	734	957	565	830	694	1510	1133
99	700	634	1045	951	633	480	858	668	1094	491	636	285	1003	640	319	499	469	1112	608	566	557	542	544	904	1084	477	380	892	806	1053	597	857	413	1242	735	382	587	569	731	853	398	371	793	971	497	898	612	1575	1289
100	649	746	937	1100	541	402	888	694	1047	496	682	351	1107	750	405	526	721	817	647	429	499	515	617	1047	1159	607	428	1126	759	949	424	701	436	1269	691	389	512	632	649	1025	512	342	694	789	496	760	995	1504	1209
101	604	519	1081	1005	658	492	967	493	1146	510	693	389	1121	620	370	633	598	1213	565	439	403	644	665	1111	1179	579	417	875	546	1106	511	738	374	1162	655	509	557	659	702	876	527	566	714	714	528	648	748	1462	1235
102	666	654	957	1057	508	473	927	539	1127	567	661	361	1087	648	448	537	709	1147	579	533	373	511	609	1040	1051	596	422	967	516	1030	520	746	377	1214	688	385	547	506	736	870	691	475	745	761	408	721	725	1516	1304
103	712	544	1041	915	363	442	856	778	1135	475	702	375	1125	562	468	569	604	1079	780	557	388	601	656	897	883	405	468	909	530	985	432	704	463	1361	602	322	565	575	669	1145	575	502	854	804	450	837	803	1554	1222
104	589	610	885	1031	545	603	702	592	1064	410	676	374	1004	595	406	509	523	1178	648	337	484	525	547	1057	1124	543	322	756	521	1067	350	785	332	1229	707	448	515	591	816	1002	399	417	766	793	463	802	814	1577	1189
105	535	703	1237	1080	587	549	841	542	1044	440	657	455	1149	634	302	606	602	1078	560	524	380	504	551	1051	963	565	429	817	463	1201	356	707	408	1368	641	432	681	636	763	1136	489	337	717	922	479	792	788	1588	1390
106	616	495	1100	989	483	443	805	724	989	544	740	453	974	738	331	562	375	1064	539	523	212	571	713	992	1062	391	481	946	579	991	434	706	379	1103	638	491	433	688	588	1224	602	522	708	750	472	681	793	1438	1335
107	667	522	1046	1106	415	365	865	393	1059	533	554	424	961	547	552	681	776	1144	718	519	363	539	521	1183	963	486	545	825	572	885	271	701	477	1143	743	239	475	600	746	933	475	376	781	1085	440	767	726	1485	1166
108	662	766	893	1085	358	425	910	608	1027	586	621	512	1004	550	503	689	774	986	557	593	431	491	658	894	1007	476	385	883	521	1028	539	713	469	1054	814	442	459	488	594	1132	479	354	817	831	536	917	803	1658	1139
109	557	654	1064	1100	585	498	862	612	1221	370	708	378	1095	746	771	552	935	1053	681	514	458	461	589	1078	1125	638	372	848	603	1150	433	675	413	1247	657	350	566	515	686	1235	426	523	794	822	630	812	783	1460	1372
110	750	669	1052	1080	462	439	874	704	1011	424	648	296	1122	690	701	1027	976	1175	634	475	476	433	540	986	1050	815	486	721	643	829	656	581	342	1118	706	369	649	716	705	1137	522	453	712	1002	388	782	665	1538	1416
111	634	785	1030	983	382	570	1056	553	1027	450	658	455	1106	737	588	1224	1196	1514	651	601	674	631	638	1079	1077	495	415	1040	469	1026	504	625	585	1194	664	414	735	732	994	1049	527	325	863	829	357	771	727	1666	1224
112	579	602	958	1056	742	490	1654	706	1078	553	808	426	1309	880	732	1132	1335	1280	729	582	744	640	640	1087	1023	609	439	971	557	1270	460	645	649	1206	806	569	906	670	1222	1111	404	335	782	998	476	681	986	1594	1191
113	645	687	1327	1029	496	506	1977	617	1206	648	677	482	1635	1133	752	962	1442	1100	576	718	735	646	584	1139	980	495	322	712	382	1115	660	654	748	1100	725	584	764	755	1300	1223	561	312	750	783	412	787	789	1505	1281
114	596	912	1270	1102	590	562	1944	405	1146	668	851	391	1888	1020	777	1358	1391	1684	682	549	1008	571	743	989	1058	540	549	1020	614	938	374	631	656	1174	609	555	990	896	1547	1119	653	520	849	827	457	777	922	1557	1296
115	613	894	1296	1084	478	448	2249	586	966	778	710	456	1960	1404	744	1401	1754	1891	949	693	984	526	633	1119	1229	508	489	783	698	1096	719	660	647	1267	679	668	1318	1118	1544	1660	739	241	731	1015	442	784	690	1544	1274
116	706	956	1362	1410	532	511	2231	492	1430	848	824	464	2123	1178	877	1202	1249	1393	1035	765	1028	554	573	1032	819	494	376	1085	628	987	714	849	704	1403	688	659	1130	1214	1621	1590	695	332	812	1065	435	840	791	1696	1404
117	731	904	1530	1593	474	712	2404	593	1690	739	1175	504	2351	1352	834	1280	1446	1801	1238	802	973	602	603	1049	1151	562	487	1292	379	1059	711	849	670	1492	695	907	1016	1165	1578	1807	619	440	812	933	593	826	749	1543	1431
118	694	962	1477	1753	482	647	2315	713	1525	679	938	506	2323	1433	1088	1351	1717	1247	1231	690	906	711	686	1201	1297	616	429	1796	481	1052	612	890	862	1612	641	897	1220	1176	1705	1743	754	503	766	946	483	753	782	1503	1346
119	834	891	1642	1817	548	652	2200	505	1546	660	1004	501	2356	1496	1009	620	1859	1792	1099	784	938	746	628	1289	1563	477	384	2164	509	923	769	897	782	1750	697	815	1151	1132	1491	1850	701	569	839	735	522	743	823	1705	1367
120	981	1063	1790	1719	471	869	2275	785	1639	646	974	548	2161	1397	821	1326	1398	1457	1044	788	602	917	766	1342	1728	632	472	1910	568	1214	672	1025	821	1652	929	664	1068	1177	1493	1864	765	643	917	958	508	873	889	1726	1435
121	1099	1044	1843	2035	612	748	2244	1282	1763	948	1068	514	2268	1471	998	1196	1126	1537	1205	751	892	896	729	1529	1295	579	482	1993	530	1069	612	1075	812	1848	1004	841	1086	1239	1537	1687	726	750	920	896	509	890	781	1574	1264
122	1082	1110	1647	1876	513	785	2258	1158	1745	922	1066	619	2589	1297	1221	1198	1483	1341	1064	709	874	811	627	1521	1305	571	547	1853	692	1002	606	1029	734	2077	932	822	1117	1172	1476	1853	676	684	1188	856	469	976	829	1616	1318
123	999	1149	1470	1792	459	796	2412	735	1845	726	1211	516	2303	1442	936	1250	1350	1438	1344	617	883	841	718	1355	1733	593	656	1839	848	1034	634	1098	866	2148	1082	755	1098	1157	1479	1907	617	945	982	812	634	999	683	1706	1639
124	1081	1013	1721	1717	539	895	2341	1203	1729	822	1147	492	2191	1448	703	1232	1535	1870	1170	853	946	698	680	1240	1790	552	592	1853	823	873	611	1086	690	2116	1151	791	782	1175	1642	1876	727	973	1060	1007	540	931	763	1753	1236
125	1066	862	1709	1663	428	784	2336	943	1789	782	1184	509	2196	1412	1053	871	1660	1377	1235	569	1064	812	617	1499	2094	533	569	2177	863	1002	541	936	809	2099	1178	693	976	1088	1463	1994	784	655	1360	697	536	1096	839	1674	1355
126	1038	959	1705	1718	549	764	2135	837	1870	855	1054	624	2140	1428	966	1380	1546	1204	1178	986	857	780	632	1398	1899	467	690	1953	841	1086	999	1109	754	2030	1110	654	831	1093	1529	1903	753	1139	1164	705	495	1057	1076	1837	1328
127	1233	1198	1544	1942	567	721	2188	1326	1691	697	990	514	2059	1387	852	1414	1616	1590	1292	701	851	753	654	1421	1981	575	643	1826	978	1224	716	1079	780	2078	1069	643	772	1113	1584	2001	718	614	1302	915	513	1052	1426	2002	1226
128	1309	1125	1757	1594	552	795	2371	1051	1769	761	1077	490	2174	1390	915	1217	1612	1417	1148	748	912	754	580	1239	2060	619	579	1807	893	1236	682	1044	697	1976	1213	741	848	1053	1607	1935	618	930	1316	845	526	866	1446	2434	1304
129	1055	1122	1630	1757	778	792	2308	939	1681	706	1133	601	2221	1491	919	1322	1485	1860	1173	709	791	824	539	1255	1933	390	499	1957	865	1218	904	1091	796	1915	1247	774	884	990	1433	1994	699	1165	1244	1201	567	943	1428	2497	1165
130	1190	874	1489	1768	551	847	2275	1195	1690	723	1173	464	2198	1486	920	1268	1332	1374	1214	725	855	825	709	1231	1780	582	667	1996	1046	1007	884	1159	729	1808	999	702	1074	1042	1663	1714	726	1101	1161	1982	714	930	1648	2528	1422
131	1166	975	1487	1796	400	712	2227	1109	1717	806	968	347	2283	1367	995	1393	1596	1302	1194	677	1029	861	746	1339	1808	665	495	1770	872	982	721	1167	779	2249	1094	608	720	979	1481	1914	675	1047	1141	1645	702	1153	1623	2596	1433
132	1251	997	1578	1865	608	862	2203	620	1761	838	1039	426	2107	1527	886	1356	1641	1900	1081	794	752	780	676	1299	1986	550	554	1681	914	1110	525	1063	751	2273	1190	698	765	1074	1523	1669	712	1016	1399	1814	809	1057	1735	2612	1441
133	1134	993	1708	1724	603	667	2182	686	1841	605	1097	457	2368	1492	911	1170	1608	1248	1011	592	1091	766	599	1035	1799	459	433	1786	766	1049	663	1034	770	2048	1126	566	712	994	1443	1737	669	1023	1154	1761	815	1064	1638	2476	1264
134	1296	922	1567	1742	524	803	2057	821	1728	847	1047	459	2139	1436	777	1299	1446	1425	1059	790	753	924	598	1369	1857	742	501	1678	833	1023	577	986	699	2025	1087	601	866	848	1392	1913	815	1178	1285	1887	838	957	1619	2695	1348
135	1230	910	1584	1722	628	752	2222	786	1789	738	966	458	2194	1229	940	1233	1303	1434	1076	755	739	711	650	1309	1791	574	501	1815	918	1051	489	1001	789	2239	1162	697	955	973	1519	1791	552	1080	1275	2091	857	1134	1684	2942	1487
136	1135	831	1498	1813	583	616	2150	1207	1587	846	1050	625	2213	1340	983	1283	1511	1393	1008	665	734	827	611	1192	1921	521	488	1809	860	1262	585	1000	752	2110	1004	742	791	905	1522	1854	778	1008	1188	2177	831	1028	1641	2881	1466
137	1119	952	1526	1681	578	832	1937	1349	1694	652	913	509	2254	1370	958	1199	1539	1424	971	795	819	798	529	1024	1877	687	474	1607	781	1098	920	977	536	2045	1205	723	819	863	1635	1809	721	1114	1389	2181	771	1051	1617	2746	1309
138	1081	841	1475	1906	744	796	2089	734	1650	711	1093	443	2263	1401	764	1179	1119	1305	1062	770	819	900	610	1212	1792	562	671	1649	656	982	604	1104	736	1784	1140	708	816	829	1465	1857	646	980	1278	1729	837	1003	1680	2778	1382
139	957	895	1537	1898	770	692	2011	823	1525	750	984	500	2210	1552	964	1105	1131	1321	1163	671	897	755	590	994	2137	538	420	1862	868	1140	829	1143	788	2124	1006	548	865	887	1512	1710	671	1167	1373	2222	869	1128	1533	2656	1236
140	1108	914	1548	1992	908	694	2133	861	1683	736	934	466	2085	1385	872	1034	1380	1284	926	738	945	760	600	1110	1468	760	471	1447	927	1092	475	1022	773	1868	875	654	812	683	1648	1824	672	1165	1416	1642	893	1051	1524	2716	1363
141	1174	928	1416	1880	968	761	1860	1294	1568	770	996	450	2082	1541	894	1158	1050	1800	1140	541	771	760	573	1104	1734	626	564	1650	874	1143	514	1045	759	2023	1070	564	749	762	1386	1603	596	1106	1260	1777	778	950	1718	2550	1472
142	1129	983	1551	1972	674	788	2014	789	1584	694	1013	580	2259	1412	812	1413	1074	1471	1037	851	592	866	685	1129	1765	622	475	1572	872	1133	634	1115	766	2143	971	683	875	893	1426	1918	618	1109	1213	1782	913	994	1823	2435	1371
143	1142	897	1390	2081	906	605	1883	677	1517	640	1071	468	2103	1404	875	1183	1379	1292	828	710	797	797	540	1042	1824	657	447	1678	744	1005	620	1130	670	1948	1014	690	738	938	1343	1565	745	954	1416	2232	908	813	1747	2650	1884
144	1129	895	1404	1716	910	678	1899	1129	1502	716	1216	493	2091	1231	752	998	1240	1653	887	697	889	776	709	984	1629	520	356	1700	882	1094	753	1125	826	1944	1033	689	881	634	1469	1915	731	1021	1271	2027	862	995	1833	2610	2006
145	1169	1001	1445	1703	660	760	1949	819	1489	572	1012	429	2100	1352	1030	1153	1290	1765	1016	820	963	688	423	1147	1665	644	464	1535	729	937	804	1187	752	1725	956	742	646	738	1187	1828	634	931	1243	2111	776	1013	1768	2525	1841
146	1106	922	1381	1776	930	852	1784	711	1614	707	1063	395	1973	1407	804	1142	1401	1733	992	740	1067	766	633	1011	1627	613	451	1629	715	1214	620	1078	694	1873	884	660	897	709	1345	1779	716	1043	1218	1750	901	882	1860	2364	1760
147	1059	794	1329	1917	861	773	1819	1086	1426	807	988	375	2115	1485	834	1067	1353	1721	911	662	974	724	675	971	1655	484	473	1498	735	1135	572	1152	670	1930	1079	670	553	593	1253	1679	781	999	1158	2182	920	969	1860	2466	1731
148	993	964	1406	1737	486	880	2051	735	1395	665	1033	434	1998	1276	824	1334	1164	1597	1105	618	906	939	731	1189	1954	591	439	1450	791	950	801	1063	638	1734	906	623	832	640	1380	1757	574	983	1189	1834	852	1039	1814	2200	1917
149	1017	1021	1261	1504	756	742	1998	1213	1516	750	1036	462	1961	1340	788	1319	1076	1688	921	768	864	800	656	986	1965	543	516	1397	750	1031	571	958	637	1920	887	478	606	600	1379	1486	674	794	1160	2268	871	982	1893	2449	1818
150	1130	909	1546	1704	758	737	1821	722	1595	750	922	564	1889	1296	849	1227	1067	1714	978	772	960	735	806	1017	1509	631	514	1604	730	968	582	1046	640	1997	821	538	637	696	1251	1835	549	779	1332	2208	962	995	1934	2129	1709
151	1028	999	1391	1713	824	676	2014	1125	1549	595	1011	422	1836	1415	818	1107	1231	1780	799	800	750	784	597	1027	1882	595	561	1497	738	1064	683	841	742	1851	869	704	724	567	1070	1760	686	1000	1311	2219	800	945	1822	2227	1827
152	1064	856	1305	1601	810	696	1899	1061	1575	810	944	351	1713	1396	840	1034	978	1648	594	759	835	737	546	1062	1788	645	404	1616	702	1080	583	988	744	1746	847	699	524	653	1197	1393	586	1035	1405	1665	829	953	1745	2173	1839
153	1103	751	1344	1811	687	681	1943	716	1447	572	928	371	1913	1341	719	1061	876	1707	872	633	1068	696	657	1011	1386	517	559	1391	760	1088	521	1030	575	1773	869	649	487	639	1193	1583	524	843	1398	2202	862	900	1743	2107	1856
154	1013	812	1472	1648	780	607	1838	1122	1482	702	1079	433	1834	1441	698	1142	857	1566	797	801	765	757	554	935	1477	643	444	1483	725	1125	710	968	597	1689	884	780	600	762	1231	1586	614	947	1286	1723	845	877	1660	1895	1895
155	1005	865	1341	1753	638	766	1969	1010	1412	493	1048	512	1983	1306	791	1443	837	1798	860	708	622	704	433	915	1924	714	523	1258	652	1052	519	1096	735	1704	740	620	668	506	1245	1869	645	885	1349	2104	986	799	1618	1882	2232
156	997	912	1476	1806	740	639	1984	631	1377	677	966	390	2022	1231	767	1120	1197	1409	676	621	850	662	522	1173	1680	625	390	1398	700	1162	544	1009	601	1841	855	742	614	499	1242	1680	509	793	1072	1853	945	896	1930	1853	2196
157	1094	891	1438	1738	797	719	1804	1095	1276	554	1081	478	1978	1557	571	1207	1129	1651	740	557	746	657	483	1057	1773	496	507	1236	872	1021	521	918	704	1991	712	657	598	606	1146	1586	511	958	1355	2050	883	887	1710	2043	2277
158	910	865	1366	1751	613	707	1844	568	1389	653	875	439	2035	1234	617	1163	758	1734	879	701	840	693	559	1048	1798	732	408	1308	661	963	481	994	607	1712	774	575	436	626	1335	1704	573	774	1231	2272	901	913	1801	1936	2328
159	1013	877	1445	1624	726	590	1794	780	1388	707	926	357	1956	1364	746	1030	891	1575	941	709	954	681	612	1084	1641	602	607	1193	750	972	559	917	734	1805	734	656	788	553	1169	1520	566	973	1344	2226	799	909	1860	1867	2229
160	961	673	1364	1776	665	628	1759	654	1371	854	886	380	1933	1307	766	999	875	1189	923	742	802	695	541	970	1665	448	596	1326	797	1022	453	830	566	1719	791	684	718	468	1075	1670	468	716	1280	2194	815	970	1818	1932	2302
161	1015	839	1450	1555	479	690	1787	1059	1592	429	881	399	1960	1220	713	1041	871	1769	751	739	683	550	490	1122	1421	600	443	1343	716	1066	559	848	498	1752	649	780	547	647	1249	1683	638	711	1572	2234	691	806	1854	1929	1915
162	971	838	1374	1676	905	702	1635	608	1375	637	912	417	1788	1243	642	973	1154	1544	828	612	672	556	602	1143	1643	546	460	1335	631	1019	389	900	581	1733	838	678	409	566	1198	1432	691	739	1285	1786	884	848	1583	1886	2232
163	937	764	1357	1600	571	530	1614	1049	1521	565	950	300	1873	1262	760	886	1012	1219	778	674	764	607	733	1106	1682	549	557	1342	564	1023	621	943	603	1810	734	690	615	566	1080	1560	606	739	1450	2124	777	812	1801	1650	2297
164	1001	909	1399	1608	713	656	1683	747	1439	513	918	412	1726	1257	717	1231	934	1145	795	729	669	680	651	1205	1486	622	403	1294	580	959	473	1087	588	1711	825	680	567	717	1125	1374	764	710	1395	2136	900	998	1749	1763	2179
165	950	898	1163	1603	521	675	1636	984	1629	652	839	439	1693	1262	852	1157	775	1654	776	667	667	585	631	974	1624	583	549	1208	648	1071	453	1072	585	1715	712	618	602	556	1140	1600	515	670	1529	2203	782	843	1872	1804	2339
166	873	888	1375	1475	632	712	1565	928	1506	528	946	436	1718	1241	678	1294	1414	1514	678	659	806	682	681	1037	1498	638	482	1218	772	965	483	824	476	1707	698	610	655	661	1151	1375	851	729	1504	2252	930	940	1669	1772	2191
167	923	718	1261	1509	836	577	1478	609	1383	643	886	316	1757	1204	673	1314	1418	1430	838	682	852	661	549	1131	1559	611	536	1185	556	1143	545	894	556	1593	589	681	497	585	1121	1424	781	624	1275	2272	786	738	1821	1626	2308
168	879	845	1148	1454	619	599	1515	901	1512	638	908	388	1762	1279	764	1195	1031	1473	633	673	744	701	688	1036	1290	511	388	1206	702	1183	526	1079	506	1579	628	593	607	440	1109	1603	605	687	1367	1981	957	887	1797	1837	2314
169	874	727	1347	1351	679	714	1598	747	1534	598	843	465	1594	1341	708	1115	1338	1204	729	659	536	617	579	998	1561	563	409	1232	663	1091	587	843	564	1736	692	694	566	533	1308	1561	611	581	1380	2415	845	804	1955	1683	2218
170	946	743	1283	1557	655	493	1501	832	1536	635	905	422	1791	1230	750	1216	1293	1688	715	655	598	559	558	938	1510	693	513	1240	607	998	664	938	548	1534	682	596	548	699	1232	1418	606	755	1337	2387	747	760	1748	1590	2198
171	868	717	1362	1568	754	664	1617	557	1487	598	925	292	1790	1291	565	1096	1023	1586	769	553	634	522	699	1041	1134	606	537	1278	738	983	699	840	544	1404	715	637	680	607	1121	1411	691	789	1334	1887	748	927	1695	1552	2157
172	744	791	1362	1351	669	632	1423	717	1581	548	989	411	1738	1329	572	1283	1309	1610	690	627	759	558	487	1001	1406	524	405	1168	674	1173	433	831	616	1727	823	610	696	596	1156	1303	560	547	1308	2120	794	804	1622	1570	1973
173	884	920	1321	1330	483	543	1433	701	1450	551	859	249	1573	1148	598	1082	1067	1526	809	608	633	539	819	942	1174	488	393	1250	697	1087	627	859	517	1401	739	618	707	565	1214	1513	606	828	1352	2247	683	842	1752	1686	2082
174	769	798	1248	1523	736	522	1672	640	1300	363	929	297	1716	1213	686	1059	1175	1484	741	513	499	573	504	1126	1422	535	559	1230	613	1055	472	738	589	1426	807	709	742	574	1254	1417	561	640	1246	2110	849	731	1669	1665	2229
175	869	765	1255	1495	624	525	1318	708	1457	562	775	325	1698	1204	619	819	1225	1442	812	473	601	509	648	868	1133	500	480	1070	610	956	476	752	483	1501	707	694	704	569	1136	1418	640	776	1325	2181	756	749	1659	1492	2088
176	827	714	1264	1409	827	606	1340	639	1527	446	875	373	1606	1274	645	977	1089	1565	739	793	656	626	489	984	1021	530	434	1239	591	971	486	800	517	1534	837	728	705	700	979	1437	624	623	1286	2045	801	853	1787	1705	2183
177	755	719	1180	1415	647	592	1371	508	1413	615	1049	351	1612	1221	625	1043	973	1095	871	581	570	622	734	976	1257	440	488	1217	667	934	559	739	531	1647	480	573	636	646	949	1336	753	628	1437	1994	550	791	1601	1656	2316
178	823	819	1291	1262	767	480	1457	581	1234	625	864	467	1542	1105	649	1123	1082	1574	747	635	513	546	673	1041	1034	590	457	1239	674	1135	544	758	461	1347	713	680	644	560	949	1292	573	692	1384	1701	618	760	1644	1623	2300
179	828	806	1145	1330	487	467	1368	636	1256	520	882	450	1571	1223	585	989	1082	1525	716	597	673	538	641	1040	1371	631	386	964	656	1061	456	785	543	1568	686	616	429	593	1115	1352	514	664	1497	1739	707	863	1513	1771	2362
180	688	775	1004	1264	597	566	1247	782	1319	594	915	354	1462	1009	532	961	890	1354	695	625	571	624	604	1162	1292	662	432	1260	532	910	419	823	458	1329	651	637	655	554	972	1424	679	671	1437	2090	745	772	1555	1686	2383
181	750	821	1201	1271	622	581	1449	616	1255	739	877	428	1473	1065	527	1052	825	1481	983	671	643	588	590	1227	1053	562	541	1091	835	1060	423	821	534	1418	648	575	611	728	1086	1406	576	691	1392	1889	698	754	1639	1698	2304
182	765	695	1257	1282	614	580	1312	647	1257	734	787	402	1553	1025	523	794	735	976	772	627	405	634	696	987	1252	548	483	1020	643	1020	504	753	554	1423	631	564	688	470	1088	1270	609	726	1283	2006	679	826	1686	1536	2214
183	802	719	1189	1062	698	681	1354	620	1390	605	872	413	1459	1035	621	795	754	1367	782	715	390	495	501	886	987	500	423	1019	737	1171	583	780	433	1371	690	611	561	527	1016	1383	526	551	1340	2093	542	968	1661	1566	2212
184	745	801	1170	1134	532	663	1295	689	1234	491	803	401	1490	1096	570	705	1020	1254	933	599	544	525	584	930	1176	443	436	944	764	1100	434	855	499	1500	633	775	471	585	1003	1296	688	569	1402	2000	678	776	1537	1561	2038
185	738	738	1218	1228	670	588	1399	821	1276	390	807	354	1384	1022	538	951	1068	1288	628	701	603	486	583	957	1237	411	553	1023	536	1027	494	775	378	1181	740	614	551	601	1066	1446	756	478	1211	2115	629	690	1481	1702	2215
186	764	862	1119	1279	324	673	1438	574	1255	392	794	341	1364	1072	548	860	694	1260	1080	562	630	504	634	1032	1038	389	422	1237	556	1067	455	732	517	1519	692	630	602	538	954	1524	545	513	1307	2260	618	822	1640	1616	1907
187	692	668	1184	1161	521	435	1307	623	1250	464	730	445	1422	914	532	1020	674	1357	880	615	644	588	512	1036	1035	593	376	1160	648	1081	555	695	544	1378	712	609	593	498	891	1438	558	476	1243	2076	665	738	1635	1560	2154
188	679	902	1134	1153	548	533	1242	676	1101	574	755	511	1291	1039	555	978	848	756	1115	443	499	525	835	1017	1115	439	356	1071	653	1241	349	827	438	1372	710	595	432	550	1025	1310	557	368	1210	2125	700	677	1623	1529	2107
189	721	863	1257	1131	603	504	1226	475	1155	584	835	363	1361	893	493	898	878	1316	1006	533	500	576	531	939	1245	608	515	976	632	1219	637	791	523	1244	802	685	577	487	870	1580	647	467	1235	2056	595	710	1633	1504	2004
190	702	737	1083	1280	538	567	1145	773	1251	682	768	386	1362	1007	522	981	918	1208	872	655	583	574	494	957	1256	489	452	1080	657	1066	539	779	426	1160	671	634	553	473	992	1452	615	577	1298	1965	639	803	1623	1643	2020
191	689	706	1082	1311	519	495	1343	592	1342	548	850	356	1444	845	550	1148	665	1338	989	576	540	512	587	840	1222	595	410	1088	589	1074	505	903	506	1344	663	605	579	614	941	1345	678	522	1254	1793	578	730	1600	1551	1915
192	693	603	1256	1225	416	451	1271	691	1197	677	719	386	1358	980	526	983	816	1224	983	540	621	620	625	1051	1157	571	508	1097	594	1091	497	690	548	1307	782	591	450	679	949	1380	508	390	1218	1923	571	721	1662	1595	2051
193	766	725	1149	1077	729	639	1309	800	1205	672	607	318	1372	824	572	1112	817	1277	1135	585	415	646	593	889	1044	606	407	1107	480	860	488	585	508	1202	762	608	610	739	948	1211	656	668	1059	1816	698	705	1674	1571	1948
194	749	624	1123	1163	379	502	1236	674	1127	505	699	436	1367	897	602	1220	931	1234	1129	602	505	588	605	976	1150	545	461	1009	368	945	463	829	511	1202	665	437	608	449	930	1429	604	656	1180	1866	638	775	1383	1641	2220
195	677	846	1171	1229	537	528	1236	915	1127	558	774	402	1319	790	461	986	619	1195	1002	592	589	666	597	1062	1244	562	496	1024	629	1065	399	634	489	1321	703	481	677	502	953	1271	599	509	1292	1567	601	698	1554	1506	1751
196	640	593	1023	986	579	461	1275	623	1279	505	859	471	1234	885	565	984	799	1019	897	687	467	737	659	975	1238	509	401	993	544	1110	482	732	475	1319	631	613	615	716	868	1155	606	456	1096	1813	421	752	1616	1478	1735
197	758	791	1103	1173	503	587	1141	503	1201	654	784	327	1432	780	518	1009	757	1125	977	746	352	482	791	1020	1225	485	475	1156	660	880	412	771	486	1078	714	552	437	550	946	1175	621	434	1121	1744	568	757	1604	1542	1880
198	685	652	1200	1109	264	593	1168	552	1176	571	686	392	1334	896	405	940	754	1040	988	725	485	622	679	1017	1195	589	394	976	663	1226	433	793	490	1294	653	515	736	607	734	1155	455	424	997	1731	614	718	1587	1589	1820
199	707	705	1123	1136	551	525	1153	754	1095	523	761	348	1237	934	482	931	664	1183	846	647	457	553	700	986	1078	560	508	949	650	1138	462	705	473	1313	755	516	569	594	944	1289	457	598	1265	1630	572	760	1506	1607	1698
200	664	801	1182	1152	435	553	1221	591	1102	686	584	396	1220	928	492	993	553	1153	980	663	360	538	515	1062	1041	580	493	1047	467	1038	501	723	388	1161	700	504	586	483	909	1074	537	531	1096	1573	562	628	1651	1673	1922
201	539	802	976	1198	558	482	1396	735	1078	752	743	432	1275	947	472	813	975	643	907	492	340	423	695	971	1224	575	497	1043	646	1206	517	708	462	1181	627	544	538	590	932	1172	589	492	1160	1564	619	635	1340	1594	1960
202	619	800	1076	1155	692	494	1223	681	1192	529	757	454	1219	845	515	805	874	1005	852	673	466	534	621	917	1030	636	351	956	433	1082	470	753	488	1265	736	563	536	625	909	1059	455	422	1164	1656	613	693	1470	1577	2178
203	771	673	1120	987	433	542	1102	623	1123	710	691	427	1179	913	462	967	750	1208	782	543	465	522	611	889	1124	582	411	1123	617	1050	377	631	443	1238	820	441	547	528	738	1190	534	511	1152	1409	549	791	1444	1486	2227
204	717	710	1045	1242	355	518	1262	502	1128	585	677	469	1140	935	530	987	718	1021	822	606	521	415	456	1153	1142	524	440	983	676	1026	387	730	511	1175	649	534	668	669	908	1141	452	381	1005	1716	594	850	1392	1610	2165
205	634	705	1295	1059	514	532	1252	501	1137	626	688	368	1270	948	504	630	875	937	790	654	307	549	592	963	1236	521	537	983	661	1121	627	783	406	1281	536	516	643	637	825	1102	538	411	1033	1555	582	754	1393	1429	2138
206	657	619	1057	1158	491	618	1229	601	1198	453	726	451	1286	1002	423	750	759	1020	855	622	608	500	568	1165	1075	581	394	1079	534	1107	648	546	384	1159	721	490	618	652	918	1101	455	514	976	1650	501	749	1439	1484	2152
207	767	666	1114	944	723	526	1122	854	1098	489	682	411	1359	805	423	1048	675	1190	872	745	324	505	691	1130	1090	502	321	896	404	912	465	788	437	1278	710	465	532	627	863	1219	617	483	1002	1508	435	687	1241	1486	1989
208	750	659	1067	1021	614	572	1104	435	984	609	793	395	1167	884	639	691	561	1087	990	637	458	528	593	1091	1119	365	381	995	554	988	453	647	573	1196	739	530	558	546	916	952	547	439	1103	1300	629	779	1532	1557	2093
209	710	587	994	1019	524	537	1119	566	1137	434	756	354	1280	836	482	748	712	1146	1049	534	370	455	526	1050	1000	545	449	891	590	960	373	811	374	1175	759	604	606	574	749	1020	529	435	938	1269	567	772	1292	1405	1918
210	511	670	1110	1104	504	560	1156	581	1311	489	745	378	1153	852	455	669	837	1114	980	531	473	555	629	953	923	556	394	953	715	934	362	691	438	1166	760	459	844	675	744	1126	420	432	1002	1070	662	645	1162	1536	2037
211	716	632	1093	1161	531	444	1052	468	1086	509	646	365	1134	899	511	669	779	547	1048	700	375	506	662	1136	1015	443	389	799	581	987	382	601	463	1140	692	492	704	511	701	1009	450	316	924	1163	604	720	1215	1692	2003
212	686	653	1011	1015	514	426	978	613	1158	656	634	435	1245	823	512	814	722	986	745	374	301	510	539	1011	1029	584	342	989	633	888	600	711	475	1225	693	500	541	757	760	1003	397	366	1062	1376	609	645	1153	1539	1791
213	528	611	1085	1076	551	566	1145	606	991	410	781	325	1061	836	496	744	630	1020	843	665	383	595	615	964	957	570	520	1055	580	972	762	710	391	1024	576	535	495	441	844	994	351	440	1121	1375	585	649	1345	1503	1945
214	684	556	1088	1086	658	579	1070	441	944	601	755	366	1138	813	465	642	716	437	789	527	379	455	615	998	829	697	368	857	459	924	530	773	419	1111	764	446	522	665	773	910	370	329	1033	1282	591	560	1249	1522	1958
215	665	479	837	1052	571	589	952	599	1073	501	755	368	1079	826	472	773	700	1022	986	551	512	474	671	973	1069	589	432	880	581	996	471	735	389	1134	661	478	631	599	819	1111	536	423	1037	1470	492	642	1096	1647	1708
216	644	688	1126	1043	764	515	936	822	1048	579	734	409	1040	627	383	710	784	1042	767	468	483	499	655	994	927	685	359	1022	606	966	659	682	415	1173	627	527	659	570	714	969	463	560	985	1237	493	616	1155	1582	1756
217	561	521	1085	1095	563	454	1037	574	1064	575	808	396	1251	809	599	728	689	967	911	385	555	665	708	1062	948	627	422	922	547	1063	511	703	401	1250	586	475	495	575	853	751	439	578	989	1243	486	587	1131	1572	1885
218	668	516	1037	912	566	547	919	458	1183	623	767	487	1048	734	523	733	748	618	754	455	254	495	581	952	888	615	428	1040	592	997	480	601	394	1178	584	571	492	615	807	1028	352	489	969	1307	587	686	1166	1477	1798
219	566	681	899	1067	674	503	928	501	1038	378	728	418	1197	728	476	577	771	995	753	637	167	437	556	962	985	827	505	1031	554	1036	327	756	433	1197	670	412	760	717	884	902	513	463	1007	1178	499	497	1118	1659	1702
220	671	581	1014	1091	556	488	838	503	1113	378	642	322	1026	830	491	728	723	1115	953	453	317	419	628	939	1026	531	337	920	601	1041	487	693	432	1154	606	538	491	609	667	950	582	330	1066	1250	700	719	948	1543	1843
221	633	626	1061	893	524	410	844	452	1131	383	657	450	1128	619	448	522	674	964	786	490	557	502	523	1011	973	506	294	920	491	1041	290	640	471	1055	659	519	563	755	755	727	486	707	842	1187	672	516	987	1522	1779
222	629	694	1053	1068	512	609	945	516	1133	583	805	356	1074	608	526	634	818	918	698	395	480	500	574	925	1144	589	439	983	689	977	410	748	424	1283	663	548	635	680	819	840	452	360	968	1087	510	501	1004	1382	1774
223	616	524	941	872	563	567	992	648	1161	355	655	406	1053	702	496	687	751	1010	800	454	519	509	817	1195	1157	603	464	1019	615	1057	430	583	519	1044	742	519	724	602	553	1031	537	493	888	1074	577	642	950	1489	1589
224	640	575	874	1096	577	565	1072	449	1067	496	743	324	1181	718	443	707	681	1044	787	399	280	376	795	1116	940	310	506	965	558	926	451	614	395	1338	719	402	514	531	558	848	380	254	994	1105	480	639	1087	1487	1730
225	727	625	938	905	509	539	886	377	1128	553	756	398	1220	582	447	637	738	999	736	412	397	525	711	998	1271	524	409	1017	649	1060	445	666	415	1193	630	474	599	589	693	963	431	433	987	1041	498	512	966	1485	1582
226	655	687	1116	1121	345	489	932	396	1017	390	572	350	1028	697	495	567	558	1019	655	542	432	585	694	978	987	499	530	947	697	944	503	722	393	1249	750	520	457	682	780	954	536	503	1148	1017	496	708	939	1332	1708
227	640	494	1018	1068	486	528	765	610	1000	432	688	347	1315	724	422	647	771	937	707	475	359	558	614	957	1189	613	518	960	653	1034	326	642	403	1145	698	609	478	522	788	682	449	369	879	1041	367	685	773	1595	1703
228	591	573	1037	1113	542	507	842	400	1128	329	715	418	1185	700	455	695	597	1124	744	399	286	488	674	921	1160	577	445	993	411	965	449	713	379	1132	681	464	502	506	842	844	488	481	963	1060	545	617	922	1572	1711
229	581	645	1200	1110	641	434	979	662	929	371	691	354	1229	594	610	468	657	1136	716	530	476	493	500	936	975	566	440	824	536	1239	445	712	356	1149	590	539	492	689	721	904	498	323	973	974	622	736	966	1603	1438
230	579	586	1070	1018	538	559	953	556	1000	619	757	399	1258	644	513	550	691	913	979	534	471	493	525	1042	1149	356	456	1023	666	1081	353	673	515	1085	528	464	667	628	840	804	491	488	883	1074	513	733	937	1509	1498
231	595	620	996	962	634	465	1084	556	1175	661	722	358	1136	611	370	479	669	904	855	472	527	555	620	916	1184	532	469	932	670	983	436	646	413	1240	763	517	568	549	697	767	443	449	864	1036	433	673	984	1444	1486
232	562	596	993	1307	520	524	971	499	1023	553	801	369	1134	649	486	558	759	1040	673	390	405	477	483	955	977	540	588	1008	751	936	494	802	366	1027	755	474	485	663	673	931	428	345	1045	911	431	676	1032	1465	1463
233	706	565	1074	972	614	549	959	427	1287	539	734	367	1191	619	545	440	907	861	749	488	355	562	567	1069	874	524	588	941	682	1095	415	535	457	1211	711	361	641	582	773	654	499	465	882	915	563	622	940	1264	1378
234	506	645	1032	1104	544	458	920	655	1106	440	642	367	1241	721	468	528	767	891	740	479	410	383	652	961	1098	511	508	922	512	995	406	587	313	1062	542	438	654	565	775	910	422	468	783	1037	461	654	854	1515	1295
235	530	487	1069	1183	563	447	853	731	1004	439	680	450	1038	682	459	598	597	489	660	390	350	607	584	908	1197	414	522	929	621	1103	397	551	374	1045	587	571	648	682	727	881	565	443	839	746	638	556	955	1414	1299
236	595	635	1083	1209	522	485	1040	463	837	442	848	246	1160	706	462	467	737	939	583	453	435	496	665	970	953	610	557	985	515	1054	405	728	347	1118	655	345	696	592	655	866	448	437	970	1082	335	640	926	1497	1290
237	565	585	1010	997	509	539	764	444	1153	465	678	455	1034	623	486	545	643	996	624	517	360	511	584	1005	1122	374	402	974	500	1033	447	627	374	1134	851	339	695	694	740	809	631	437	928	1088	496	562	902	1480	1207
238	599	568	915	1050	548	496	1096	511	1068	515	741	451	1090	626	470	571	759	535	753	449	365	455	598	1114	1073	499	493	927	640	1034	360	673	281	1149	585	360	606	488	675	909	354	558	875	968	489	685	881	1400	1248
239	554	554	970	1033	497	450	927	455	1130	377	742	462	964	675	617	605	701	1051	657	401	337	514	562	990	967	645	578	929	471	1040	352	548	435	1090	615	394	460	659	781	778	553	374	883	864	501	678	855	1380	1045
240	531	573	1017	976	411	480	805	753	1137	447	590	370	1064	773	425	439	769	933	796	662	455	524	657	910	994	493	381	1109	622	1156	418	733	473	1070	797	305	532	739	618	746	520	333	933	962	360	535	854	1459	1110
241	521	687	902	1015	598	553	873	575	964	528	583	349	1203	679	564	458	756	895	719	513	604	496	629	1072	1025	616	436	960	376	1033	453	630	356	1156	578	309	658	553	618	902	454	454	861	919	555	738	930	1487	1115
242	647	489	889	1220	429	519	759	556	1071	489	609	394	1094	720	549	677	484	850	697	494	323	387	611	773	1087	542	448	928	484	961	469	684	367	970	600	398	530	833	629	726	468	574	897	1026	517	658	883	1487	1058
243	511	700	1027	1043	548	531	926	690	1051	453	606	431	1116	678	589	529	619	1115	832	595	677	539	496	1020	1052	471	477	944	538	1121	518	601	432	1015	685	381	576	664	725	861	464	366	948	1110	585	711	871	1429	1091
244	652	695	935	1099	613	582	1198	669	1039	399	736	330	1014	544	540	578	537	1051	792	496	370	603	704	964	927	552	573	977	543	1110	419	545	380	1061	482	338	622	518	824	863	469	462	828	1013	529	661	1057	1382	1103
245	594	562	981	1115	526	601	915	614	983	426	576	442	1023	631	631	619	702	883	866	506	377	513	452	1036	1055	497	406	965	499	982	606	609	435	1061	767	483	543	682	722	848	465	585	690	960	450	539	880	1488	1068
246	633	615	803	1051	673	564	847	738	1158	462	766	218	1116	503	550	601	645	885	805	659	270	644	656	819	1127	386	431	1026	451	1095	401	682	443	1070	651	414	589	585	816	698	559	396	790	1177	429	717	730	1473	1112
247	557	550	1043	1022	542	526	717	746	991	397	532	436	1084	562	319	599	576	1050	710	548	440	492	591	1038	890	592	440	872	442	963	446	676	404	1047	711	362	480	548	677	754	343	487	833	1345	340	636	941	1385	1011
248	630	614	1009	1060	511	568	984	414	1108	578	646	303	1161	629	446	686	927	414	754	657	423	443	566	931	892	348	318	978	648	1031	462	706	320	1024	692	309	665	714	875	836	517	605	822	1751	598	638	1070	1440	1225
249	482	706	1107	1076	469	507	919	518	1116	313	664	480	1004	487	431	568	644	499	669	503	403	543	512	991	925	503	444	967	590	1202	380	654	373	964	657	365	459	592	592	1020	513	605	873	2015	447	616	824	1343	927
250	600	616	1131	1029	466	472	792	441	1279	312	605	363	872	543	597	568	700	873	771	522	370	465	576	985	979	509	452	850	546	943	496	596	471	1205	760	426	658	477	622	813	371	376	972	1485	461	677	947	1413	1027
251	655	720	911	1118	497	497	921	512	1008	379	593	368	1039	528	579	612	649	439	844	382	222	493	569	1164	965	490	357	997	485	1057	416	710	438	1075	647	360	498	636	605	767	573	396	939	1787	498	629	976	1272	804
252	548	583	979	1176	426	543	1114	528	1167	380	471	402	1194	624	504	620	700	880	640	385	498	547	529	955	996	457	471	1121	408	1090	436	710	367	1032	751	338	555	457	739	883	434	459	877	1809	487	600	930	1456	824
253	561	646	1036	1158	562	568	896	670	1081	456	632	447	1047	725	424	557	651	981	749	540	313	478	601	1086	945	567	481	863	555	961	380	568	303	1002	761	364	663	705	755	936	487	416	817	1828	569	596	830	1519	753
254	575	697	916	1052	449	624	824	667	1067	535	648	339	1195	628	411	654	609	971	964	622	226	510	549	1067	1098	528	470	966	403	1046	385	604	378	1067	526	455	496	632	809	733	376	475	833	1892	482	636	737	1394	1052
255	650	727	1042	1066	576	512	1053	740	1132	467	708	484	1169	598	289	719	729	1015	826	504	408	437	626	933	920	490	586	1037	599	1029	400	617	268	1047	650	529	500	645	645	754	422	409	869	1465	465	668	863	1389	906
256	606	701	932	1107	592	533	865	429	1092	447	667	340	1011	660	467	583	686	951	617	415	373	406	705	1057	867	642	480	993	540	1142	489	527	319	1076	612	449	560	464	559	799	474	536	928	1677	448	539	866	1442	1002
257	486	556	1046	1019	546	391	920	713	1072	394	685	479	1177	624	504	449	734	928	757	467	439	547	588	1046	1074	440	467	1092	780	1191	352	710	343	1091	572	489	503	540	650	826	604	366	799	1809	401	642	921	1419	885
258	675	634	940	974	556	474	916	412	1043	461	562	552	1035	709	708	597	772	619	850	580	438	465	494	1130	971	493	400	910	417	871	508	467	403	1128	682	544	641	674	701	766	538	464	860	1909	536	629	899	1279	1045
259	618	695	1051	949	355	419	884	666	1006	409	586	472	1055	874	528	552	729	892	926	454	387	567	618	918	1176	534	385	954	466	1016	222	460	366	1089	701	478	400	511	627	739	385	320	892	1543	547	663	998	1410	862
260	607	778	1068	1057	651	577	964	465	1158	537	673	386	1215	500	460	582	702	925	633	540	429	521	595	1104	955	664	586	837	544	1002	378	561	352	1084	614	354	551	573	827	690	412	529	783	1851	398	604	917	1342	831
261	523	599	938	984	582	524	1046	578	1167	427	571	373	1116	636	481	400	662	988	755	486	292	472	721	1069	1112	498	518	987	533	998	580	616	327	1148	717	634	556	527	690	830	366	383	948	1556	483	529	828	1394	778
262	623	692	1032	1023	402	462	1121	440	1085	431	675	365	1074	787	503	576	852	419	781	406	310	542	615	1046	1024	533	461	976	650	968	470	644	290	963	821	394	477	598	572	782	610	336	799	1492	510	691	1031	1319	938
263	749	661	749	1052	534	487	717	653	1144	366	550	384	1195	550	323	497	729	938	816	445	441	561	571	1060	1035	419	369	913	500	1013	524	686	391	1018	654	542	465	436	665	922	561	406	901	1443	521	726	853	1439	961
264	678	598	913	1156	379	533	763	464	1064	407	710	295	1060	539	540	567	719	402	819	579	435	457	593	771	1069	511	475	932	539	1019	453	600	363	1076	581	413	402	535	684	608	492	496	1017	1718	618	572	795	1242	843
265	685	736	1040	1155	577	493	871	704	1099	538	630	335	1119	690	489	628	570	574	692	412	386	573	761	1026	867	393	472	918	654	1119	477	646	408	954	616	335	549	751	697	802	346	502	947	1697	408	581	712	1367	796
266	541	517	1016	1001	480	459	919	553	1034	455	511	461	1091	664	425	528	716	849	658	349	362	528	599	1009	1223	558	473	932	516	1088	495	545	392	1060	718	469	479	644	741	693	517	417	700	1516	529	632	800	1344	901
267	647	546	939	1088	524	562	894	693	1173	456	617	400	1170	644	554	441	743	1075	587	456	480	515	674	936	1095	534	536	934	562	1033	557	640	489	1069	746	482	651	518	697	779	381	584	939	1813	654	570	932	1497	902
268	535	668	1104	1075	682	519	1037	523	1167	427	564	338	946	694	556	473	629	901	722	517	398	464	562	1127	1098	524	460	868	497	961	391	617	442	1042	610	353	524	630	828	758	424	400	781	1694	450	535	968	1489	879
269	544	660	1000	1032	466	571	889	619	1088	628	599	335	1063	534	405	683	761	910	681	635	457	510	586	1042	1185	528	591	854	528	1018	406	707	468	1161	629	440	540	515	709	799	346	493	819	1515	574	629	790	1383	826
270	692	549	935	1142	621	505	1081	602	1039	456	513	301	1048	659	413	525	788	1080	737	481	537	407	675	940	1046	516	527	965	682	946	362	599	362	892	656	527	470	700	745	758	446	232	954	1300	387	535	816	1418	712
271	549	595	1060	1088	439	496	839	543	1039	324	459	355	1045	587	483	475	585	880	712	441	307	627	495	1022	966	334	477	915	611	1136	519	601	367	866	649	297	541	607	601	903	500	455	797	1536	477	639	864	1486	824
272	535	601	894	1020	582	580	791	545	1118	457	597	311	959	525	494	560	589	920	730	567	622	574	558	930	1038	552	382	870	472	1079	399	452	483	992	575	331	536	534	712	884	500	423	936	1497	600	609	856	1334	905
273	573	566	1076	1050	551	318	874	512	1088	367	703	353	1035	572	519	605	750	867	794	461	356	621	612	885	1140	774	459	889	582	1130	375	564	418	1108	692	448	623	627	577	808	373	426	837	1421	516	576	1021	1326	656
274	503	566	1092	1129	334	497	836	433	1223	469	579	422	1047	529	329	677	748	578	678	504	579	607	556	917	1128	477	477	957	539	1111	456	740	414	1050	609	416	548	575	775	702	463	452	882	1234	439	677	947	1305	815
275	666	616	972	981	573	414	913	658	1154	657	570	443	1370	597	486	675	616	526	703	512	359	506	520	926	1124	411	532	962	510	1038	494	487	455	1021	548	552	659	682	773	791	553	398	876	1483	492	580	906	1452	871
276	606	635	1045	1186	547	467	914	566	992	455	535	271	1302	554	455	694	830	906	929	414	412	589	627	845	981	650	464	844	575	1034	379	614	423	1089	657	276	628	612	668	649	551	559	947	1441	422	573	949	1452	640
277	558	660	950	1080	593	523	958	548	1042	394	685	258	1108	434	384	459	746	963	557	475	459	538	653	971	1191	441	534	918	674	1065	473	497	339	1087	570	274	597	547	654	633	445	520	874	1363	379	582	978	1408	697
278	719	605	896	1064	566	473	882	462	1077	365	602	402	1202	563	466	578	705	949	817	506	378	504	565	1008	1118	548	630	878	570	1068	442	658	343	1028	646	401	474	489	631	817	445	406	878	1546	469	590	887	1450	899
279	603	570	1109	1066	527	430	961	513	912	499	633	384	1297	719	418	497	554	849	620	467	475	660	566	1035	1004	607	603	1116	484	1086	433	606	493	980	592	352	559	504	662	929	481	593	623	1243	523	636	887	1371	675
280	570	688	1015	933	539	506	899	450	1122	481	591	360	1128	641	402	690	740	859	923	274	241	537	637	1041	985	471	400	935	489	1083	371	680	379	919	825	458	502	562	539	806	399	515	779	1459	465	668	1012	1354	936
281	545	477	1123	1133	549	490	845	561	962	494	734	472	1135	494	453	429	767	863	826	384	394	536	552	981	940	467	540	1004	463	1087	629	604	394	1049	658	451	679	617	737	694	489	341	825	1242	502	611	724	1477	865
282	588	634	1042	1136	579	456	906	786	1115	434	563	456	1063	606	374	642	676	801	744	404	387	596	680	1057	1053	566	500	930	522	1046	408	528	278	1111	683	502	403	664	737	831	404	679	767	1324	447	642	851	1415	811
283	509	624	949	1005	515	540	741	543	1044	435	469	468	1180	558	505	475	883	540	795	631	472	547	705	963	1043	596	503	821	444	984	471	614	368	976	643	354	632	583	720	761	409	396	818	1303	515	513	877	1390	710
284	618	560	988	1027	605	717	1020	621	1179	344	708	342	1195	560	372	588	768	950	840	570	364	484	609	877	1112	579	481	952	511	1121	565	695	397	1076	735	474	429	807	585	838	397	437	851	1044	555	610	881	1415	718
285	565	647	1146	1133	534	504	999	452	962	455	536	372	1120	704	358	491	710	876	882	401	354	632	618	998	1003	446	566	875	435	1057	441	622	433	1117	744	430	485	697	590	776	536	506	965	1270	500	588	918	1369	852
286	689	500	951	1020	547	517	947	432	1009	565	710	417	1037	520	362	615	607	988	1032	518	210	444	581	925	1131	431	371	1054	495	1001	563	572	362	1138	725	403	540	598	723	862	404	676	858	1127	364	619	1050	1502	786
287	537	623	959	1050	508	512	1009	471	1019	462	529	472	1125	508	402	510	771	614	959	542	368	418	650	935	1010	625	391	848	565	1007	460	701	408	1179	730	383	588	611	802	718	382	388	876	1482	343	509	973	1467	672
288	629	629	1109	1076	639	647	924	431	1176	484	478	445	1023	732	469	553	835	519	768	404	434	458	650	862	1077	619	390	1028	473	975	504	549	319	952	643	477	612	767	866	728	417	363	969	1177	600	549	831	1344	713
289	530	634	767	1108	519	545	1063	583	1050	479	636	339	1164	553	514	489	640	577	795	530	437	595	624	967	1056	476	519	971	629	1091	507	709	413	1128	608	412	451	653	668	648	423	535	727	1121	479	557	926	1536	724
290	528	483	973	1157	593	446	1022	368	1017	491	652	364	1021	815	495	566	636	620	733	429	392	660	792	908	1018	484	487	888	601	1085	363	643	439	1119	643	364	581	738	783	736	527	284	975	1173	472	574	939	1468	748
291	581	521	948	1088	530	512	1003	453	1086	561	660	334	917	620	431	420	658	988	939	415	352	556	658	889	1208	499	533	827	516	1069	514	656	470	1025	615	542	537	562	616	780	536	519	861	1084	395	626	770	1159	878
292	690	579	935	1125	558	476	964	432	1059	536	646	545	1282	611	631	601	597	589	887	476	364	534	746	1054	1053	493	519	968	544	1092	483	684	372	941	604	434	619	582	632	937	442	442	884	1096	552	572	766	1416	799
293	512	691	943	1263	447	466	1110	318	1021	441	488	356	1266	499	599	549	721	576	941	553	376	618	583	989	885	623	507	912	526	1068	468	769	450	1068	623	368	398	634	649	743	331	394	847	1129	476	627	830	1429	831
294	667	675	1019	1092	360	626	976	446	988	470	738	390	1188	548	357	455	628	650	1018	564	269	567	622	987	1071	540	559	936	473	1157	459	588	249	1061	653	306	711	522	533	880	409	452	818	1217	448	707	811	1441	790
295	578	573	984	1129	515	544	1024	422	1104	390	646	356	1189	706	471	601	773	1037	862	402	261	484	700	929	1021	666	523	825	613	1074	400	719	386	982	652	494	454	575	689	828	448	534	848	1029	544	640	870	1506	689
296	548	582	852	1022	661	493	930	476	1050	573	693	319	878	546	431	563	671	871	860	544	241	568	659	987	903	498	442	964	557	1141	439	649	407	1115	664	451	537	537	719	954	571	438	879	1038	488	469	879	1439	919
297	429	571	929	1215	235	408	923	457	961	445	631	343	1216	648	532	399	600	873	803	505	496	538	512	971	1054	460	534	917	546	948	483	634	314	1104	708	442	693	566	590	665	504	432	944	916	405	424	980	1377	888
298	617	505	1037	1058	583	470	1042	424	1137	452	603	406	1018	567	484	536	660	1222	868	400	419	568	635	1029	988	558	393	758	600	1037	447	566	369	1249	705	582	540	627	775	740	520	369	849	1178	538	409	811	1445	928
299	590	706	1107	1108	666	514	1012	540	1003	397	570	384	1031	601	443	632	731	1053	903	489	628	545	599	1076	981	467	519	926	535	1160	539	415	399	1068	631	466	591	660	710	765	417	448	708	1091	453	569	820	1532	816
300	565	632	1020	1282	586	567	1109	427	1188	438	531	356	1155	587	412	504	742	774	806	560	415	547	697	1014	1004	598	501	935	473	989	401	607	353	1046	625	381	545	482	684	851	382	477	931	1060	545	504	878	1393	916
301	509	550	938	1018	608	604	823	507	1105	625	603	264	1114	530	339	614	724	500	868	508	367	516	621	935	1042	658	444	1019	525	986	423	441	409	1219	725	527	616	538	771	628	525	390	724	1048	401	474	918	1331	766
[truncated: 131 more columns]

## Sheet: WT, AWATeTx
Figures 2C, 2S-1A, 5S-4E, 4S-2F
AIA::GCaMP5A F(A.U.)
Stimulus:	1.15 µM diacetyl
Genotype:	WT																					AWA::TeTx
N:	1	2	3	4	5	6	7	8	9	10	11	12	13	14	15	16	17	18	19	20		1	2	3	4	5	6	7	8	9	10	11	12	13	14	15	16	17	18	19	20	21	22	23	24	25	26	27
Frame (Pulse at 100)
1	1071	735	1243	715	987	1142	1145	748	720	1097	484	1058	1032	1157	548	633	584	880	447	1064		1040	857	1121	480	848	880	751	889	747	795	711	964	1064	474	538	790	743	745	837	652	624	189	898	1141	140	830	816
2	1444	772	1280	699	1086	839	1041	826	662	1148	628	1038	1257	1159	597	789	611	1034	579	1083		828	961	1103	510	762	880	533	846	580	724	905	1057	1147	483	632	960	705	785	886	562	780	35	867	1047	-5	714	1033
3	1335	846	1392	730	1100	1356	992	780	640	1161	500	1023	1153	997	639	614	460	959	500	967		982	944	1194	346	701	765	768	1001	552	781	891	849	1149	432	577	742	711	626	916	688	828	81	915	1068	39	883	991
4	1467	631	1361	625	973	1033	984	629	696	1180	535	1015	1064	1160	726	712	638	1168	472	959		904	1077	1185	408	765	862	783	860	495	802	939	932	1075	487	478	868	621	760	894	555	714	141	961	979	121	972	955
5	1434	651	1468	716	1088	930	1017	763	554	1232	481	1027	1176	1174	720	687	568	1151	569	995		784	874	1118	451	739	747	693	971	547	658	943	1007	1226	576	512	955	689	601	848	512	775	202	788	857	27	997	968
6	1335	866	1227	712	901	1264	1024	578	614	1133	643	848	982	1152	662	695	624	1064	499	1051		1000	1003	1156	342	733	710	742	664	556	703	744	934	1219	412	567	786	646	924	987	570	724	224	853	906	12	950	906
7	1511	673	1324	655	925	967	1127	581	640	1215	555	1061	1071	951	620	791	563	1159	560	950		1027	960	1189	514	764	602	775	1069	581	735	957	903	932	471	641	658	774	869	814	641	577	102	945	984	103	891	930
8	1163	692	1303	741	1132	1156	1050	655	724	1341	546	1035	1162	1187	805	742	607	1068	402	902		927	887	1403	382	746	779	692	787	537	759	796	986	1140	456	600	834	649	781	837	552	778	137	806	1048	98	746	896
9	1526	546	1411	735	1122	1165	1031	701	609	1238	700	1200	1167	1089	767	790	663	1353	514	919		949	948	1231	419	535	767	869	848	841	791	881	914	1038	393	685	731	658	581	846	440	647	82	749	974	83	920	981
10	1123	735	1402	591	1073	999	1067	800	713	1124	606	1031	998	1126	691	586	592	978	469	838		843	1051	1063	442	763	811	903	785	699	705	991	878	1128	383	568	909	867	780	872	592	769	191	897	784	95	855	1061
11	1224	636	1195	651	997	1234	1014	799	612	1151	630	1116	886	1273	647	816	697	1097	456	911		937	748	1176	399	650	691	746	905	583	938	958	996	1148	437	511	670	686	818	836	547	529	338	900	1058	92	803	862
12	1303	743	1114	698	1101	1049	1062	566	583	1264	562	823	1153	1216	719	676	684	1070	408	983		924	900	1121	396	654	771	671	967	533	731	898	898	1218	523	620	623	685	728	946	638	790	189	847	938	86	795	1015
13	1534	690	1291	575	1110	1266	1064	880	597	1276	547	1018	1149	1013	670	700	611	1342	544	974		858	943	1129	445	639	775	518	912	552	751	802	872	1104	416	525	1064	708	741	954	565	746	193	823	981	33	922	943
14	1186	623	1289	713	1183	1164	998	653	484	1051	439	1189	994	1085	631	696	559	1114	611	840		912	910	1284	386	861	684	772	945	635	556	1011	829	1080	398	588	836	858	735	935	605	882	49	843	945	65	849	958
15	1213	601	1164	595	1127	1004	1097	607	529	1246	522	952	1088	1039	830	620	583	1281	418	870		949	937	1200	468	722	593	795	886	711	738	897	853	1066	427	408	734	647	717	932	658	827	52	815	983	-27	824	956
16	1223	665	1237	694	989	942	1114	764	694	1148	456	1010	1114	933	628	628	767	1068	470	978		921	918	1220	403	793	645	824	794	615	656	1005	1029	1285	510	412	841	732	775	883	666	620	96	718	1080	170	969	967
17	1176	765	1267	710	1024	1132	1168	658	591	1250	469	999	1079	1036	561	703	644	1068	632	901		947	973	1118	466	735	651	823	702	618	767	991	893	1187	393	633	964	804	976	875	670	610	54	930	1088	120	889	847
18	1354	685	1299	578	1192	1122	1155	813	645	1128	616	967	1165	1037	806	793	686	960	477	1014		868	869	1079	292	684	758	895	973	691	648	841	958	1148	519	614	775	737	726	864	587	631	29	917	1137	151	915	798
19	1579	671	1309	764	1119	1053	1059	692	541	1209	650	1146	1074	1067	609	782	565	1233	578	841		886	969	1132	427	813	884	665	739	558	811	842	925	1072	463	721	715	811	670	907	735	640	32	790	1089	67	932	876
20	1327	447	1387	726	1134	1206	1077	628	524	1217	476	949	1084	1012	675	669	478	1039	691	1130		933	936	1265	364	865	837	845	729	476	783	969	935	1028	487	553	810	777	780	798	531	672	97	611	1077	-9	895	835
21	1280	621	1374	657	967	924	1006	720	648	1061	533	1018	1106	980	720	746	749	1157	487	926		903	1106	1119	376	568	753	868	815	542	591	986	880	963	509	525	742	785	673	941	654	689	93	880	1153	50	749	1036
22	1353	604	1265	786	1176	1199	1048	694	590	1232	583	1036	1142	1083	726	896	583	1248	560	775		917	915	1149	427	728	635	723	892	717	728	952	723	949	401	526	727	761	747	826	635	497	93	821	1008	120	806	1009
23	1464	593	1370	719	1032	984	1020	574	783	1140	477	1031	1061	1032	594	592	612	1181	507	1004		778	864	1258	372	704	672	690	793	523	774	1132	873	1217	499	448	683	864	792	752	798	805	152	925	770	51	934	740
24	1221	620	1276	770	1093	999	1023	580	455	1213	475	1118	962	961	704	608	782	1176	554	865		953	911	1299	460	837	646	752	931	529	667	1418	874	1129	484	409	752	886	753	1069	695	744	111	873	975	87	1007	969
25	1509	779	1336	689	985	1044	1173	796	540	1124	600	1068	1066	1195	806	675	690	1041	570	1147		822	963	1194	442	715	584	731	946	534	712	1372	1103	1106	417	496	883	758	755	964	623	772	172	880	792	178	948	880
26	1467	450	1334	700	1225	1090	1054	659	634	1203	478	962	1057	984	515	661	625	1343	531	995		1016	890	1166	426	766	949	508	817	558	644	1461	913	1112	410	693	896	755	715	1048	687	658	30	877	1028	-9	888	988
27	1493	770	1292	641	1001	1101	1112	814	597	1132	657	928	1212	1119	668	500	599	1196	590	936		943	973	1140	391	811	878	765	856	543	571	1711	1010	1035	398	631	657	693	890	1043	563	640	232	747	944	138	975	860
28	1436	646	1366	831	1144	1127	1081	666	446	1232	555	1003	1019	1244	627	699	739	1126	506	970		860	953	1250	366	854	791	702	662	567	821	1798	983	1085	382	616	605	822	884	918	539	684	297	824	926	38	899	1003
29	1075	666	1304	505	1083	1073	1096	675	545	1139	578	1005	1086	1074	753	721	598	1173	616	906		984	1057	1109	416	860	713	828	935	657	742	1733	920	1094	402	597	801	932	751	789	553	668	174	839	1034	98	968	919
30	1505	665	1271	573	926	932	1137	731	398	1215	540	974	1078	1205	707	673	651	1163	559	934		868	1014	1238	528	779	658	799	870	467	781	1964	986	1239	688	638	954	842	717	802	565	661	168	775	1134	121	938	955
31	1118	682	1347	972	1044	1124	1034	680	495	1346	632	1013	1052	1018	852	683	515	1135	585	932		960	1114	1182	494	745	824	748	817	596	766	1894	1006	1095	498	621	811	682	659	774	553	640	106	904	1029	44	763	923
32	1349	505	1356	733	992	1064	1215	687	654	1183	733	1055	1079	1027	636	641	654	1275	643	923		1050	842	1060	543	857	779	678	740	594	627	1802	858	1093	419	558	588	704	621	962	573	657	132	999	1013	128	987	931
33	1468	495	1347	671	1225	963	1257	744	636	1315	412	1058	1056	1122	797	699	695	1201	590	929		974	846	1253	364	744	685	771	908	718	672	1922	907	1307	369	637	897	710	936	869	622	557	-6	911	928	86	780	994
34	1368	668	1286	718	978	995	974	799	551	1271	582	1098	1260	1155	843	723	533	1128	485	1006		922	931	1258	283	781	728	724	860	686	619	2015	1108	1195	401	628	757	685	518	813	560	711	193	889	798	83	1041	807
35	1318	672	1412	749	1140	1111	1240	693	665	1311	510	982	1098	970	708	750	699	1176	476	775		918	1077	1170	548	726	814	579	841	635	645	2019	1104	1108	388	575	771	764	823	905	605	665	225	791	999	170	898	836
36	1328	630	1469	800	1175	1103	1113	776	558	1507	587	1112	965	1123	685	700	555	1294	646	994		921	1077	1158	337	628	928	656	730	669	699	1961	996	1000	444	504	664	850	808	878	487	791	212	787	882	160	830	981
37	1470	589	1433	668	1123	1122	1096	768	553	1262	447	1089	1130	1148	689	843	552	1095	525	847		916	958	1153	467	756	773	729	919	572	957	2001	799	1082	511	557	792	891	844	928	541	668	76	831	1022	13	947	835
38	1325	627	1352	587	1079	1185	1025	756	471	1373	574	1059	1006	1086	730	832	514	1073	457	1024		1016	946	1088	346	707	792	758	828	524	669	2236	949	988	535	539	773	741	837	920	628	810	40	943	1030	118	963	1096
39	1471	607	1391	708	1017	890	1052	666	528	1181	502	1166	1115	998	604	699	728	1259	554	1006		908	899	1096	348	744	785	664	865	687	563	2113	1024	1201	528	493	686	869	728	762	544	739	185	917	957	35	877	945
40	1197	693	1301	669	1110	1163	1121	751	559	1398	549	870	1034	1236	742	735	489	1040	614	895		1065	1032	1083	308	635	764	788	920	506	836	2051	1011	1264	498	487	707	880	848	973	644	758	206	800	1024	49	835	926
41	1245	460	1343	747	1038	1120	1246	587	604	1314	585	1046	1220	1095	642	731	550	1232	594	1051		894	1030	1028	498	814	705	800	839	557	802	2020	899	1184	546	507	668	810	836	722	624	809	175	842	1013	155	744	1037
42	1270	548	1398	687	989	1005	1127	723	543	1299	567	1178	1125	1041	782	663	657	1223	646	815		885	948	1080	640	716	823	726	945	760	825	1973	1070	1293	443	638	757	694	447	783	520	754	85	917	1062	119	856	1024
43	1260	797	1309	715	1174	1455	1080	734	547	1355	420	926	1114	1123	729	652	598	1138	462	796		1000	965	1114	335	646	799	744	756	638	814	1989	1036	1163	552	516	669	777	809	883	611	599	83	998	984	10	876	902
44	1237	670	1376	712	1048	1690	1039	630	513	1343	416	938	1008	1042	688	707	458	1191	423	866		1002	902	1105	409	670	727	805	946	702	732	1972	918	1191	530	641	713	669	788	877	607	794	117	773	1077	138	925	980
45	1482	723	1422	611	1187	1983	1034	778	717	1199	574	1002	1038	1160	630	665	577	1016	471	816		1041	874	1143	476	810	712	651	915	582	872	1994	938	1120	550	652	737	884	809	746	792	714	166	852	804	160	790	1024
46	1162	639	1359	640	1066	2085	1030	514	551	1283	529	1060	1166	1000	621	586	739	1184	609	892		1056	953	1253	445	780	635	541	954	674	660	1736	1053	1086	504	346	766	770	784	751	523	685	188	968	1094	172	807	1066
47	1368	644	1409	716	1145	2451	1117	753	613	1533	761	1098	1030	1103	633	675	482	1018	564	1146		869	1066	1224	444	963	964	590	868	595	655	1739	1062	1049	549	455	720	740	797	906	620	711	-53	876	884	179	748	753
48	1623	623	1306	805	1158	2236	1155	834	648	1485	586	976	1175	1191	770	714	724	1236	604	1082		1013	920	1272	369	815	802	743	769	641	726	1559	995	937	454	504	850	715	789	919	460	808	194	846	902	118	928	882
49	1568	728	1322	739	1023	2298	1103	814	564	1304	477	1185	1051	1081	553	648	522	1124	498	889		836	946	1205	402	1064	783	737	1016	638	696	1547	942	1217	519	715	730	856	879	840	506	842	264	878	989	113	836	1095
50	1194	462	1351	674	1174	2136	1080	767	599	1315	534	1005	1227	1109	608	725	558	1175	517	936		990	969	1169	438	684	659	729	960	717	811	1359	1067	1134	555	435	615	636	689	745	579	635	216	963	960	61	979	1022
51	1514	425	1306	845	1170	2184	1133	712	540	1249	543	1093	1028	1065	635	599	690	1056	581	1077		958	947	1157	470	889	703	712	904	645	761	1455	1138	1217	337	534	627	770	806	865	465	691	198	780	921	119	986	1011
52	1462	613	1339	698	971	2146	1147	691	576	1345	556	1096	1054	1025	642	856	593	1135	475	958		860	988	1188	377	724	743	513	1076	621	822	1685	941	1241	462	554	955	749	729	955	606	791	229	900	822	182	789	1038
53	1613	684	1402	508	934	2025	1101	722	445	1435	596	967	1109	1139	655	636	538	1124	547	985		991	992	1170	431	793	716	589	903	544	711	1261	944	1086	437	484	837	679	787	794	615	804	195	866	999	46	945	992
54	1451	287	1319	565	1165	2066	1201	718	638	1369	513	998	1107	1105	669	789	634	970	521	963		847	945	1177	373	794	626	704	911	617	630	1375	1104	1168	504	593	788	804	718	747	518	764	189	885	961	-55	797	1026
55	1345	677	1378	775	1118	2060	1124	786	565	1395	455	976	1140	1137	754	779	558	1054	576	1020		947	1074	1167	296	670	656	586	978	664	803	1400	1011	1117	449	594	654	853	798	854	567	810	153	860	850	80	808	892
56	1245	611	1370	796	976	2014	1108	685	514	1336	436	1022	1045	1071	652	615	599	1138	565	962		961	934	1135	489	656	621	782	862	615	667	1413	991	1165	512	711	816	684	810	1001	540	730	176	827	869	3	794	955
57	1445	535	1303	794	1057	1949	1302	695	696	1348	587	892	950	1037	725	652	598	1235	606	1015		982	1051	1211	380	585	726	743	809	642	747	1615	990	1070	421	527	755	846	686	803	681	703	183	845	1230	33	861	876
58	1193	384	1419	546	1046	1814	1085	659	439	1194	496	1036	1159	1098	644	611	700	996	547	1102		1044	923	1256	449	670	655	552	981	508	843	1278	1052	1015	559	691	773	798	623	906	656	675	27	853	1005	89	856	920
59	1194	404	1400	628	1238	1847	1116	712	625	1238	626	851	1000	1103	707	826	647	1075	573	1035		1027	941	1315	380	698	655	789	797	756	753	1179	852	1001	451	623	736	705	720	804	431	858	-20	848	895	104	812	820
60	1263	570	1209	707	1061	1535	1136	689	614	1373	577	994	1118	1112	687	753	519	1005	566	1108		990	916	1337	386	672	766	719	967	607	674	1335	965	1048	399	681	952	716	826	990	630	814	38	802	1166	60	944	905
61	1434	574	1353	700	1215	1740	1095	679	592	1304	584	926	1176	993	750	787	717	939	512	994		1005	866	1084	388	655	568	625	985	676	773	1322	914	1098	523	440	733	819	645	755	603	837	210	885	940	161	869	931
62	1352	485	1430	699	1107	1624	1062	808	463	1403	502	989	943	915	667	746	593	1103	597	896		1015	874	1203	520	784	628	901	980	730	815	1200	1006	1049	493	595	773	859	847	903	701	843	124	781	877	55	1059	968
63	1360	520	1448	772	951	1508	1087	705	606	1364	569	902	1128	1059	555	745	574	1274	583	981		979	972	1171	501	848	705	863	806	788	572	1265	875	1121	499	582	657	885	688	710	639	779	56	924	1047	15	951	997
64	1460	424	1364	606	1073	1777	1111	751	583	1469	382	979	960	1227	693	735	556	1108	536	1062		1010	906	1327	524	553	709	711	1019	536	770	1188	1043	1152	484	625	776	721	810	750	488	625	148	874	1000	45	918	921
65	1403	566	1466	669	1161	1775	1192	731	545	1453	412	922	959	1218	681	550	666	1231	463	808		987	867	1167	476	804	677	499	861	557	755	1383	969	1159	486	604	820	795	783	818	754	788	49	926	917	102	804	1007
66	1511	581	1450	775	1185	1328	1076	666	627	1430	521	1023	1126	1015	817	847	654	1132	509	999		994	839	1046	486	903	721	860	943	560	686	1176	948	1012	488	621	710	620	817	798	551	901	92	919	935	171	796	945
67	1273	336	1460	762	1118	1313	1013	729	549	1317	662	943	1033	1035	649	688	641	1133	539	1161		1109	847	1143	488	691	582	826	875	577	590	1202	1101	1142	502	621	778	787	867	747	667	621	158	851	839	-53	978	988
68	1546	418	1589	625	1006	1384	1190	515	497	1193	439	909	1085	1099	792	905	544	888	625	875		908	964	1192	442	932	826	499	877	641	598	1172	960	1002	478	495	722	731	835	818	623	764	192	821	889	169	780	1087
69	1532	462	1323	795	948	1258	1188	715	622	1348	456	1078	1294	1199	772	739	587	1100	639	956		906	932	1304	450	938	654	585	819	451	536	1078	1039	1049	570	346	557	701	741	792	455	754	117	874	866	118	937	967
70	1377	460	1372	740	972	1274	1212	650	653	1379	526	914	1080	1191	658	810	616	1172	563	1007		870	992	1268	356	835	594	614	896	616	742	1032	987	1192	497	508	817	657	757	720	550	781	80	837	956	144	832	943
71	1404	428	1300	699	1155	1323	1115	648	603	1530	654	1057	1087	982	595	843	659	1047	500	947		763	1113	1201	446	700	770	744	858	562	760	1091	978	1075	350	516	551	798	798	870	569	734	172	797	1325	94	985	964
72	1235	370	1227	710	1132	1335	1140	733	595	1469	476	962	1093	934	584	743	670	1020	633	1037		1087	947	1359	465	827	858	746	944	598	737	1065	962	1198	493	526	613	857	879	788	627	836	222	969	1027	110	846	911
73	1197	351	1258	676	1097	1209	1096	741	575	1475	465	985	1028	1191	681	666	529	1015	623	836		939	971	1118	534	614	730	840	908	606	710	1092	834	1075	579	457	663	780	794	903	645	830	196	931	926	74	941	919
74	1230	856	1341	590	1037	1280	1101	706	613	1517	551	1043	1176	1143	670	627	650	1060	420	798		956	833	1192	434	615	695	770	827	562	782	1150	982	1024	568	531	699	879	763	764	602	658	118	942	872	113	781	1044
75	1516	855	1494	674	1234	1167	1083	702	611	1368	553	1025	1141	1160	536	702	548	1082	527	1041		920	965	1193	527	757	875	842	848	554	872	1089	1099	1000	490	356	632	637	671	822	595	601	130	812	925	75	780	933
76	1385	654	1451	582	1260	1257	1088	725	649	1500	614	869	1046	1054	796	798	622	1072	725	998		1028	869	1148	449	861	737	799	963	719	725	957	977	1004	530	607	847	746	891	795	606	704	226	1016	796	102	823	993
77	1196	693	1387	824	974	973	1123	735	620	1206	492	944	1141	1085	691	739	539	1055	609	963		838	928	1162	454	654	627	576	950	552	703	974	1069	1173	500	515	789	803	1014	705	592	750	123	956	1081	127	959	919
78	1198	489	1246	728	984	1007	1253	705	739	1366	581	971	1094	1005	701	707	455	893	549	902		905	1049	1225	390	788	702	739	823	648	818	1082	1055	1201	485	602	676	761	818	678	524	611	112	774	915	204	967	937
79	1462	822	1469	839	1051	1266	1025	729	570	1318	451	821	1029	1133	738	739	531	1070	689	943		976	1045	1233	427	769	700	752	758	574	680	924	898	1207	417	582	695	777	830	826	775	844	185	824	818	103	704	902
80	1179	502	1371	743	1236	1149	1087	593	549	1348	497	1159	1048	1150	724	639	580	1012	457	981		1000	1063	1191	483	798	667	701	817	582	693	1012	1092	1168	328	416	613	751	928	782	558	749	50	849	804	125	745	1060
81	1144	340	1316	880	1116	1071	1091	619	443	1410	423	1055	1142	1076	670	581	715	1013	596	1175		834	887	1107	450	822	861	818	864	662	717	1131	1116	1101	443	557	959	778	864	798	549	633	242	944	1081	125	745	1023
82	1465	457	1384	846	1122	1175	1049	723	631	1389	553	887	1096	1049	644	693	584	936	557	940		876	916	1382	576	810	749	676	794	693	662	976	1087	1061	488	459	762	949	717	772	507	465	154	919	817	110	773	1032
83	1245	484	1403	762	1047	999	1053	743	438	1512	553	965	1118	895	770	725	482	972	545	1099		909	1111	1332	385	769	852	726	788	472	786	1011	977	1177	447	567	812	890	767	765	563	776	166	945	971	174	821	890
84	1285	672	1393	688	1009	983	1069	602	585	1448	633	873	1152	1058	677	770	564	1135	605	1062		845	797	1239	490	693	663	600	765	570	630	939	893	1265	431	429	634	801	843	802	735	712	238	901	947	92	868	1052
85	1432	587	1445	782	1019	1076	1031	664	607	1412	659	847	1057	1144	745	740	614	1212	527	1123		938	912	1244	533	783	603	721	894	638	763	924	869	1132	500	535	733	811	607	673	632	592	144	871	937	199	918	859
86	1189	381	1331	948	1245	986	1043	703	690	1492	366	1034	1314	1080	715	850	630	1009	502	1001		959	1140	1267	573	748	776	772	762	622	785	1159	944	1213	404	520	691	665	714	666	592	621	214	937	958	155	759	867
87	1446	454	1354	679	1104	952	1056	684	462	1429	430	962	1128	1111	771	677	500	1054	592	1069		968	926	1292	278	850	873	652	990	698	830	979	883	1096	417	429	728	802	924	812	518	665	169	715	1148	93	881	915
88	1270	367	1535	726	1127	1068	1069	614	692	1420	476	981	1094	1129	725	615	427	955	535	954		1040	983	1437	307	750	918	891	853	490	800	1133	959	1293	502	631	963	691	696	871	632	737	200	841	993	182	828	857
89	1441	387	1438	728	1221	1191	1128	732	689	1434	528	1255	1213	1106	559	590	528	1240	576	1042		923	977	1375	453	679	734	715	931	740	710	872	975	1013	620	526	706	552	837	767	648	717	189	970	874	51	818	953
90	1281	769	1412	909	1115	899	995	679	658	1410	605	1044	1084	1070	674	827	548	1106	586	1023		913	1029	1312	496	611	800	698	768	583	689	1016	861	1108	557	552	615	755	776	774	626	713	175	790	930	168	905	885
91	1442	859	1405	852	1218	1123	1070	757	690	1392	418	1085	1051	1068	632	808	714	882	542	1089		834	1021	1201	467	881	752	621	809	581	636	919	806	1166	583	453	683	840	846	930	558	714	125	889	1118	121	802	906
92	1309	421	1223	693	1019	1044	1098	688	719	1388	522	1018	1095	1137	706	749	515	963	743	823		986	981	1368	440	871	839	733	766	576	725	980	1063	1226	505	632	766	755	839	777	659	623	148	997	886	100	892	998
93	1390	501	1411	755	1026	1062	1213	682	556	1342	605	991	1023	1050	685	735	554	936	588	1021		975	822	1323	449	860	786	687	825	570	781	1081	993	1122	460	425	634	770	713	800	566	751	114	987	1069	100	1096	992
94	1180	486	1426	720	950	910	1207	616	518	1342	641	992	1209	1178	813	641	577	1216	523	785		1123	921	1265	624	679	679	822	691	592	633	1140	889	1264	447	540	696	660	825	773	774	726	153	805	936	142	829	930
95	1541	680	1290	674	848	994	1061	591	601	1450	550	1051	1192	1235	760	754	666	803	498	1013		839	904	1283	511	926	786	726	783	513	717	1159	1030	1128	467	494	666	964	905	691	644	836	124	956	924	137	977	960
96	1540	341	1326	1043	1098	1078	1175	710	551	1465	550	1062	1234	995	639	714	583	900	430	887		1054	1040	1335	594	643	683	747	625	689	731	1190	1030	1152	544	523	851	911	1005	777	574	653	154	821	1048	86	878	999
97	1446	701	1281	742	949	1232	999	716	597	1310	330	1190	989	1108	678	843	582	975	609	995		901	908	1313	439	657	746	814	767	528	683	968	936	1219	350	562	641	687	935	720	601	657	199	782	982	192	799	1059
98	1265	418	1434	770	1007	1108	1123	708	523	1344	714	1217	1139	987	699	639	519	949	579	901		919	955	1356	496	868	711	656	826	688	775	945	984	1043	407	527	565	769	894	768	649	860	243	858	929	-76	885	947
99	1547	763	1473	764	1117	1069	1114	744	722	1576	672	1166	1013	1239	705	809	591	952	575	1002		958	995	1387	369	796	688	720	755	518	592	873	937	1083	545	441	812	754	840	738	625	709	196	789	848	78	828	943
100	1276	393	1414	752	1081	990	1058	732	542	1369	539	1034	1007	1058	813	748	539	1032	525	936		987	1051	1406	383	709	775	808	691	625	795	946	845	944	389	579	817	712	669	644	685	631	211	805	934	171	911	1001
101	1335	414	1355	784	1028	988	1152	756	591	1371	605	1099	1183	908	816	603	466	926	580	965		850	873	1523	408	797	789	790	784	662	723	832	1002	1095	547	686	925	726	988	735	562	525	160	890	967	119	762	986
102	1381	394	1511	699	1185	1047	1100	633	696	1318	644	959	1138	1137	865	721	614	859	690	795		896	978	1336	542	760	703	740	830	498	619	907	1000	933	377	599	815	749	695	619	583	696	238	888	928	10	870	972
103	1351	512	1332	786	1142	1036	1042	708	654	1308	564	1096	1053	1062	944	710	626	902	616	907		1033	864	1530	299	681	813	720	748	619	606	947	1040	1186	566	575	870	826	828	646	609	781	146	942	1013	37	753	1029
104	1443	710	1295	736	1103	999	1200	652	682	1373	561	911	1168	1001	969	639	548	980	629	1023		914	1047	1501	405	762	804	744	818	629	920	962	988	1163	536	722	558	834	845	624	495	649	205	796	782	121	806	952
105	1496	710	1495	689	1162	880	1151	763	710	1494	606	963	900	1090	896	707	572	986	637	894		926	987	1438	477	775	618	634	591	616	747	991	800	1049	505	494	653	690	1067	809	731	831	165	979	803	135	952	1045
106	1181	437	1481	589	1093	971	1065	570	459	1394	433	1077	1153	1227	1129	653	563	1034	468	954		911	951	1546	610	713	741	842	695	594	676	960	1098	1054	536	530	553	696	647	682	644	663	-15	820	820	170	839	870
107	1255	743	1287	644	947	961	1134	698	515	1380	704	952	1225	910	878	638	534	1060	521	966		1072	893	1300	522	759	697	742	913	661	696	934	1094	946	599	493	937	796	866	959	735	533	126	771	822	57	955	946
108	1389	731	1459	745	1050	983	1066	650	632	1332	442	1047	1054	1126	994	625	679	924	534	898		921	1121	1218	299	813	689	689	735	649	820	964	1072	960	471	499	826	949	978	809	632	842	209	884	784	40	910	877
109	1455	745	1496	670	982	949	1224	854	582	1453	499	989	1199	864	960	637	746	1037	542	909		930	1042	1422	395	943	802	683	692	533	732	887	820	961	514	386	696	773	825	880	631	675	296	791	882	65	813	936
110	1385	851	1360	747	1110	1137	1120	741	829	1501	721	1032	1273	1039	719	694	562	879	606	824		873	985	1315	315	745	623	782	714	676	802	874	1006	1127	328	444	819	782	809	813	526	688	222	821	1077	146	913	979
111	1274	331	1295	779	943	1295	1401	578	495	1404	612	1003	1153	958	968	788	479	935	556	940		934	1011	1423	495	959	826	967	703	662	715	879	883	1111	371	582	915	791	732	832	528	630	70	732	921	129	803	902
112	1266	359	1426	650	1072	1717	1435	804	451	1385	465	1007	1202	1181	963	717	486	790	576	1006		1021	1174	1485	331	1058	984	1173	753	636	791	934	855	1074	534	515	898	818	818	904	582	784	248	907	1013	70	909	1034
113	1464	789	1409	709	1053	2120	1544	676	687	1528	652	1121	1148	1128	887	580	516	789	531	914		897	899	1355	414	1085	877	1359	875	835	838	941	1076	1202	458	454	1351	636	923	793	560	694	218	1015	1004	123	1041	992
114	1242	797	1408	692	1075	2494	1758	741	583	1459	784	953	1155	1135	1069	723	527	999	594	851		976	882	1418	486	1831	849	1290	958	768	765	900	910	1046	512	542	1638	838	732	958	521	717	290	869	1164	197	817	1144
115	1576	429	1404	700	1436	2912	2102	814	592	1615	740	898	1253	1263	775	701	645	943	569	964		923	914	1397	374	1717	1070	1628	845	796	977	966	852	902	416	580	1260	790	861	979	593	923	409	838	1226	79	935	1289
116	1755	898	1459	597	1700	2652	2288	796	653	1618	800	811	1377	1984	1084	619	491	1000	640	946		885	1107	1423	383	1665	1178	1538	971	908	1077	979	852	1090	509	475	1445	916	829	1024	574	914	392	1055	1300	220	861	1232
117	1761	984	1484	695	1922	2648	2691	801	711	1632	986	881	1707	2126	1285	763	604	898	798	827		1096	1103	1453	307	1795	1365	1709	1033	1111	1165	789	1208	1006	552	534	1370	884	1031	1205	591	1112	463	1016	1293	294	738	1381
118	1900	1431	1552	622	1993	2727	2999	873	662	1752	1159	1093	2196	2231	1491	675	578	824	1233	803		1329	1404	1254	439	2086	1488	1667	1124	984	1093	958	1232	1047	424	522	1298	885	1166	1302	729	1136	503	934	1344	327	967	1480
119	1920	1627	1595	601	2084	2742	2961	929	653	1640	984	947	2032	2493	1803	696	718	920	872	991		1402	1451	1531	480	1671	1495	1813	1287	975	1130	985	1514	1045	580	757	1488	720	1084	1513	740	1097	439	958	1353	369	791	1468
120	2457	1485	1758	1033	2428	2954	2898	1238	729	1485	1124	950	2180	2657	2360	615	866	817	927	854		1600	1508	1402	729	1879	1481	1634	1331	963	1208	996	1422	987	558	773	1524	863	1187	1140	899	1349	478	974	1430	236	992	1503
121	2414	1435	2079	754	2353	2904	2870	1358	609	1537	1098	895	2075	2928	2417	753	716	905	955	1018		1757	1354	1528	853	1816	1503	1728	1436	1053	1361	1036	1452	981	649	1114	1880	688	1257	1423	876	1239	541	1125	1430	372	979	1655
122	2093	1804	2035	771	2507	2932	3144	1406	728	1604	1088	737	2380	2689	3015	887	837	952	1095	801		1810	1658	1595	1053	1953	1409	1833	1645	1033	1273	965	1632	1088	935	1060	1908	698	1401	1584	890	1301	478	893	1524	435	980	1560
123	2444	1604	2084	589	2330	2930	3298	1597	613	1753	1115	1031	2432	2798	2698	915	883	798	1045	759		2337	1640	1836	842	1930	1619	1655	1605	1069	1364	1138	1657	1088	862	1105	1618	665	1224	1409	870	1230	519	1094	1391	338	1063	1554
124	2720	1636	2128	474	2337	2519	2895	1620	811	1701	1015	853	2433	2339	3217	1060	980	906	1230	792		785	1447	1630	832	1862	1560	1706	1559	969	1247	1375	1549	1087	851	1006	1522	807	1346	1353	944	1333	494	1022	1659	387	998	1578
125	2511	1625	2048	707	1596	2779	3042	1669	679	1697	1065	941	2626	2760	3217	949	963	914	1113	783		837	1552	1734	815	1937	1409	1738	1509	1037	1404	1272	1695	1126	772	1061	1631	831	1393	1480	1060	1392	465	1088	1503	419	1040	1551
126	2125	1559	2145	768	2444	2653	3041	1798	820	1731	1244	1188	2399	2706	3193	1437	883	788	1161	1010		846	1544	1847	960	1931	1455	1665	1617	1290	1441	1301	1647	1093	1009	1131	1460	775	1342	1530	970	1089	397	1150	1437	289	1039	1475
127	2570	1518	2238	801	2411	2704	3128	1720	740	1627	1064	1510	2518	2614	3388	1825	1099	884	1038	754		1212	1442	1766	926	1937	1359	1559	1729	1178	1313	1915	1581	1036	1001	1000	1726	971	1319	1498	901	1219	546	1171	1429	315	1076	1704
128	2525	1596	2230	656	2436	2844	3102	1821	660	1680	983	1582	2578	2545	3188	1687	982	860	947	1018		879	1515	1584	362	1927	1439	1605	1660	1060	1220	1925	1256	1028	826	1060	1577	826	1320	1475	877	1370	486	1125	1459	435	1098	1619
129	2691	660	2209	718	2368	2715	3011	1853	692	1580	1000	1586	2528	2566	2499	1764	1045	804	1090	858		873	1500	1787	392	1957	1586	1697	1491	1182	1163	2025	1668	1127	787	1010	1335	850	1418	1408	970	1259	460	846	1583	261	924	1523
130	2591	1319	2106	500	2316	2673	3170	1781	633	1766	992	1796	2528	2754	3141	1741	1078	933	1153	866		1328	1495	1645	318	2156	1442	1553	1639	1060	1529	2358	1533	1251	770	1024	1594	802	1447	1403	1111	1190	456	1003	1404	271	974	1513
131	2145	1571	2218	770	2282	2829	3085	1733	788	1533	1105	1761	2452	2238	3052	1723	955	911	962	840		846	1564	1803	388	1911	1419	1651	1546	1228	1336	2178	1409	1156	912	1104	1357	857	1186	1454	937	1331	381	1200	1435	299	1046	1547
132	2084	1422	2140	718	2440	2716	3024	1731	818	1557	905	1791	2510	2344	3196	1124	1101	737	972	914		846	1529	1804	482	2066	1511	1700	1541	1158	1411	2149	1619	1032	781	1195	1576	755	1156	1516	1076	1328	-38	1090	1561	337	1115	1375
133	2089	1424	2202	759	2341	2692	2834	1538	806	1784	997	2078	2460	2550	2844	1304	1164	932	1009	779		842	1612	1717	295	2029	1333	1636	1637	1109	1188	2380	1615	1010	789	1086	1439	738	1317	1301	995	1392	341	1129	1452	386	1138	1604
134	2055	1393	2187	688	2431	2792	2792	1670	666	1645	915	2024	2525	2297	2685	1966	911	781	1100	1025		2476	1483	1607	455	1956	1482	1696	1422	1156	1382	2496	1455	1024	864	1049	1914	759	1500	1493	987	1432	426	1117	1461	363	1181	1525
135	2438	1485	2165	689	2237	2787	2902	1611	568	1738	838	2148	2397	2739	3172	1957	1123	800	1090	1011		2800	1487	1511	472	2125	1400	1620	1614	1093	1176	2516	1468	1143	926	1062	1385	687	1547	1403	890	1229	450	1099	1594	400	1030	1592
136	2539	1387	2098	659	2423	2675	2926	1785	563	1800	960	2024	2498	2556	3137	1973	938	805	1206	1040		2258	1692	1585	1008	1912	1500	1639	1541	1396	1238	2372	1283	1131	869	997	1274	760	1295	1484	775	1253	434	1022	1471	252	1102	1533
137	2124	1475	2029	752	2382	2807	3034	1824	635	1631	851	1904	2290	2436	3201	1773	1123	904	928	1337		2410	1498	1567	745	1884	1443	1687	1568	1231	1077	2292	1329	1223	774	972	1473	876	1366	1579	857	1285	376	1101	1348	290	1133	1454
138	2383	1311	2188	781	2253	2789	2745	1686	810	1673	967	2006	2407	2747	3146	1783	1019	882	985	1286		2276	1525	1504	890	1757	1445	1753	1487	1086	1344	2524	1489	878	879	1050	1479	723	1512	1528	783	1265	294	1028	1348	327	1041	1428
139	2412	1242	2060	852	2231	2799	2662	1564	608	1707	891	2097	2368	2695	3048	1727	1068	868	860	1447		2336	1428	1762	314	1743	1397	1849	1507	1030	1383	2427	1526	923	900	909	1526	647	1275	1387	892	1175	315	1022	1284	304	941	1477
140	2122	1357	2190	684	2363	2886	3142	1710	596	1543	920	2010	2432	2233	3179	1343	750	888	902	1458		2353	1657	1599	845	1983	1433	1541	1583	1156	1259	2380	1592	809	795	1008	1381	926	1414	1432	981	1441	340	1075	1359	386	1199	1253
141	2060	1170	2080	708	2241	2737	3060	1748	612	1506	773	1989	2204	2323	3020	1666	1004	1076	674	1347		2459	1512	1572	865	1852	1386	1737	1547	992	1234	2541	1502	1031	835	1215	1386	730	1194	1546	794	1102	435	955	1284	191	1086	1519
142	2500	1401	1977	938	2366	2839	2692	1629	722	1719	950	2103	2513	2433	3025	1638	806	970	930	1347		2390	1545	1631	1020	1711	1442	1631	1436	1237	1348	2344	1439	1185	809	1003	1461	876	1171	1462	891	945	415	1026	1301	345	1154	1529
143	2169	1226	1965	720	2304	2740	2646	1565	676	1534	756	2105	2485	2490	3097	1421	864	896	934	1499		2161	1384	1614	834	1899	1353	1797	1607	1033	1265	2347	1502	1097	824	1145	1369	750	1248	1467	930	1221	354	761	1200	239	1078	1489
144	2037	1402	2013	788	2580	2436	2722	1730	655	1461	869	2203	2319	2168	2883	1584	930	855	956	1582		2597	1385	1672	972	1528	1422	1717	1609	1087	1355	2142	1490	974	624	1023	1455	793	985	1507	842	998	300	1061	1239	302	1148	1421
145	2127	1409	1990	783	2279	2382	2778	1728	782	1475	914	1953	2427	2591	3096	1534	842	940	913	1668		2640	1342	1692	843	1793	1315	1591	1547	955	1289	2249	1580	1056	743	1253	1438	745	1132	1393	1003	1241	367	1129	1231	372	971	1290
146	2344	1377	2093	474	2342	2719	2800	1788	771	1333	848	1978	2422	2345	2545	1546	1072	997	880	1612		2295	1341	1581	854	1681	1355	1802	1616	1336	1157	2317	1556	1190	327	805	1775	942	1209	1482	1066	1328	404	984	1242	335	1107	1336
147	2443	1214	2142	734	2400	2450	2782	1595	537	1505	907	2175	2313	2240	2682	1506	908	999	965	1511		2443	1416	1393	792	1808	1250	1683	1555	1042	1156	2646	1421	1167	591	1049	1372	578	1226	1402	926	1190	313	872	1153	375	1016	1201
148	2072	1290	2019	836	2384	2581	2841	1746	605	1350	713	2026	2388	2141	2930	1183	1019	989	737	1569		2693	1303	1507	789	1761	1266	1920	1584	1045	1134	2339	1536	1054	381	1022	1400	812	1285	1248	864	978	352	1017	1274	392	1111	1458
149	1917	1266	2055	885	2173	2667	2819	1562	584	1533	864	2034	2342	2297	2794	1439	1076	984	823	1629		2247	1546	1711	790	2017	1240	1800	1726	1189	1294	2365	1482	1202	325	1012	1237	811	956	1392	934	1066	325	1199	1240	269	895	1390
150	2255	1336	1930	581	2215	2669	2728	1482	705	1492	737	2188	2338	2070	2951	1479	998	1069	750	1472		2753	1539	1554	867	1770	995	1567	1517	1209	1267	2651	1358	1099	494	898	1406	690	1033	1236	993	1181	397	977	1218	236	1024	1433
151	2104	1287	1972	758	2105	2433	2807	1638	820	1509	826	2052	2224	2188	2812	1327	1050	895	798	1641		2337	1369	1461	777	1527	1376	1767	1494	1181	1114	2456	1308	1127	749	911	1348	616	1106	1260	879	1228	318	1178	1394	301	1051	1450
152	2133	1219	1982	553	2320	2548	2869	1434	666	1475	667	1911	2317	2146	2965	1307	1069	1003	831	1650		2324	1518	1498	816	1859	1110	1666	1553	1085	1200	2640	1144	1275	631	1051	1731	838	1193	1300	893	970	278	1155	1281	421	1070	1495
153	2000	1245	1946	736	2202	2442	2768	1667	716	1357	923	2026	2247	2097	2894	1356	1052	832	764	1639		3078	1347	1683	750	1780	1384	1575	1701	1247	1189	2541	1460	1206	785	920	1463	795	1009	1366	963	1166	238	1075	1066	353	1053	1287
154	2253	1125	1822	601	2220	2515	2676	1676	800	1478	667	2007	2154	1686	3043	1238	829	773	780	1779		2536	1470	1735	883	1726	1038	1847	1523	1163	1352	2622	1480	1238	704	819	1365	744	990	1350	921	1055	368	1081	1162	362	1168	1370
155	2154	1230	1879	1032	2205	2512	2700	1688	670	1492	736	2031	2180	1851	2493	1253	996	956	730	1837		2527	1453	1841	638	1522	1553	1495	1650	1011	1048	2643	1546	1385	624	923	1327	766	972	1262	1144	980	349	1105	1160	321	1113	1136
156	2102	1034	1894	590	2242	2497	2624	1603	862	1320	829	1924	2166	1869	2789	1469	973	906	877	1718		2607	1438	1692	786	1696	1127	1731	1707	968	1204	2554	1447	1174	566	915	1661	755	1139	1133	943	1023	331	990	1166	233	774	1315
157	2137	1061	1901	561	2270	2583	2658	1617	714	1373	781	2100	2269	1921	2781	1688	913	828	772	1680		2535	1518	1746	768	1602	1146	1797	1694	1132	1128	2119	1516	1213	576	988	1460	866	1029	1305	857	1010	332	965	1244	295	1065	1301
158	2253	970	1809	757	2146	2529	2622	1641	726	1416	698	1841	2206	1812	2560	1600	975	782	575	1701		2429	1499	1653	693	1817	1095	1575	1436	1034	1195	2328	1266	1054	612	1004	1385	711	987	1120	924	1236	337	1070	1079	222	1031	1237
159	1739	1086	1888	731	1986	2550	2555	1670	670	1404	756	2065	2204	1694	2714	1569	924	1048	715	1621		2152	1509	1613	828	1611	1077	1689	1479	1089	912	2304	1437	1059	697	893	1404	805	856	1315	903	1156	366	1158	1191	298	964	1170
160	1572	1050	1897	691	2180	2584	2571	1370	814	1393	695	1976	1988	1791	2653	1499	991	783	696	1752		2155	1427	1719	702	1695	1455	1406	1459	900	1261	2190	1292	1118	629	1081	1423	666	1158	1152	1063	902	425	1040	1181	260	959	1156
161	1918	1074	1848	619	2097	2618	2947	1633	697	1350	726	2114	2096	1831	2568	1732	843	943	585	1463		2576	1519	1777	596	1858	1124	1594	1494	1006	1136	2018	1179	1211	686	943	1735	784	948	1250	890	885	297	1044	1095	344	1054	1147
162	1662	1037	1654	655	1998	2904	2781	1516	757	1307	605	1815	1958	1644	2376	1836	884	787	577	1530		2388	1416	1695	592	1808	1034	1553	1493	937	1218	2154	1328	1314	532	1113	1532	848	1024	1230	852	921	329	1186	1058	246	1142	1257
163	1910	1061	1803	530	1891	2685	2740	1672	703	1495	828	1927	2067	1715	2817	1859	936	812	851	1616		2176	1306	1827	604	1756	1160	1588	1547	1154	1094	2156	1609	1103	626	1067	1412	965	915	1347	924	1015	282	1168	1022	347	998	1254
164	1575	923	1755	640	2062	2783	2763	1662	651	1444	574	1878	2187	1489	2545	1856	935	882	479	1402		2307	1380	1762	690	1586	1134	1623	1464	1008	1053	2139	1284	1153	586	841	1348	892	1007	1226	992	683	344	1110	1167	243	1002	1265
165	1385	1004	1799	607	2044	2631	2805	1566	719	1383	726	1835	2088	1505	2795	1920	871	888	629	1257		2201	1452	1830	618	1683	1177	1460	1510	1085	1051	1882	1396	1145	540	911	1208	899	1171	1126	933	1172	352	1075	1024	336	1076	1171
166	1497	1002	1607	630	2071	2762	2688	1611	623	1301	764	2015	2037	1548	2664	1913	801	1033	833	1343		2709	1366	1695	598	1734	993	1620	1592	1128	988	2034	1257	1045	294	704	1273	870	880	1151	889	965	345	1095	1014	310	1023	1286
167	2029	904	1609	495	2111	2889	2796	1709	672	1349	701	1762	2221	1505	2561	1886	914	955	680	1270		2461	1310	1793	660	1632	1074	1676	1529	924	1072	1847	1232	1260	772	879	1203	805	845	1339	779	865	293	969	939	330	1009	1161
168	1616	950	1619	587	2108	2526	2736	1781	613	1297	768	1735	2174	1459	2792	1715	833	762	579	1479		2396	1436	1699	547	1597	1091	1347	1366	1006	1072	1841	1151	1254	664	880	1265	857	718	1282	962	921	374	1055	1037	418	1160	1356
169	1625	870	1586	637	2141	2437	2765	1522	692	1347	685	1911	2134	1498	2696	1484	817	1035	701	1352		2642	1363	1708	552	1573	968	1612	1331	1033	936	1940	1267	1233	678	897	1272	740	967	1220	1104	810	243	1159	959	282	1048	1219
170	2026	1018	1739	816	2238	2522	2933	1758	683	1257	685	1810	2070	1402	2535	1690	867	872	771	1355		2521	1358	1694	654	1738	1035	1438	1392	1139	1007	1789	1122	1250	634	816	1111	900	782	1253	938	885	302	846	903	266	913	1291
171	1633	1109	1656	589	2240	2252	2748	1653	783	1394	783	1525	2057	1334	2433	1649	885	981	625	1426		2766	1337	1650	515	1721	1038	1557	1466	1163	989	1770	1294	1126	648	841	1207	866	801	1202	823	885	455	1215	1012	312	976	1281
172	1525	825	1568	584	2125	2321	2852	1543	618	1388	723	1694	1840	1376	2114	1395	998	878	558	1360		2722	1405	1566	515	1776	1047	1616	1459	893	967	1789	1316	1135	709	745	1209	981	780	1091	972	779	504	1117	957	352	1058	1070
173	1669	964	1774	564	2200	2259	2675	1702	741	1364	619	1908	2002	1402	2076	1447	763	845	637	1343		2515	1361	1604	538	1718	1099	1482	1457	999	1013	1634	1343	1208	626	807	1209	914	842	1267	894	950	131	1116	920	262	1092	1121
174	1915	903	1690	792	2058	2395	2745	1671	601	1358	704	1690	1904	1175	2056	1408	941	783	687	1053		2526	1225	1712	562	1597	1015	1340	1370	1025	942	1758	1192	1071	420	673	1486	643	1018	1214	840	846	303	944	979	214	897	1251
175	1504	917	1642	792	1955	2373	2880	1827	703	1262	777	1696	1993	1248	2064	1407	915	913	634	1574		2473	1281	1520	687	1586	1128	1330	1563	1035	1030	1559	1411	1094	694	753	1090	798	990	1147	741	1007	334	1125	1077	324	1118	1052
176	1423	996	1760	703	1976	2377	2604	1627	658	1349	580	1760	1876	1460	2196	1545	790	778	588	1197		2436	1251	1473	567	1678	1084	1441	1424	926	1084	1715	1242	1101	608	758	1170	744	773	1116	824	1052	379	960	982	279	1004	1180
177	1554	764	1703	727	2210	2389	2472	1627	699	1359	712	1581	2053	1221	1833	1427	1238	891	475	1374		2408	1341	1610	505	1702	1032	1338	1271	1087	1058	1918	1224	1155	562	814	1078	852	793	1313	822	812	393	1016	1032	318	931	1208
178	1704	964	1694	527	2058	2201	2587	1620	833	1325	845	1633	1937	1234	1797	1315	1007	889	708	1188		2371	1276	1690	430	1438	964	1374	1393	1042	917	2050	1353	1184	659	852	1252	886	733	1318	695	884	196	906	849	258	996	1120
179	1508	851	1557	595	2109	2301	2699	1580	818	1317	686	1532	1959	1030	1571	1189	1045	831	674	1152		2674	1268	1586	466	1631	958	1519	1413	1086	866	2415	1303	1076	628	576	1137	681	842	1148	896	895	255	1066	935	416	1079	1030
180	1515	847	1641	712	2064	2249	2401	1553	815	1320	878	1721	1948	1288	2140	1153	883	870	674	1169		2586	1459	1480	613	1550	945	1452	1323	1085	976	2352	1309	1012	478	674	1124	909	775	1294	734	978	147	1081	970	177	1118	974
181	1724	967	1660	817	2277	2360	2454	1595	774	1422	611	1655	1803	1376	2009	1356	961	896	610	1140		2766	1372	1588	542	1651	1082	1462	1496	892	928	1991	1349	1078	524	713	1438	723	702	1109	820	1015	22	1021	931	292	937	1392
182	1335	888	1694	730	2162	2268	2408	1429	755	1551	527	1626	1871	1151	1761	1137	935	761	731	1248		2194	1482	1700	527	1788	921	1488	1385	932	1028	2157	1206	1109	530	747	1092	955	834	1221	959	1056	262	1119	993	351	1077	1251
183	1721	899	1599	714	1998	2433	2387	1418	654	1350	768	1449	1790	1213	1639	1119	840	864	595	1083		2647	1343	1667	441	1529	1032	1433	1500	1120	1031	2301	1427	1226	529	792	1311	793	726	1120	832	912	184	1190	835	209	999	1105
184	1585	990	1690	631	2055	2541	2546	1464	689	1269	737	1563	1672	1091	1706	1210	1001	809	599	1144		2211	1300	1695	542	1505	1080	1239	1478	1013	981	2215	1133	1208	571	685	1272	850	698	1125	745	793	117	940	881	375	1008	1165
185	1583	750	1552	623	2224	2301	2281	1529	583	1386	682	1435	1694	1141	1805	1328	907	970	534	907		2497	1476	1553	548	1420	1031	1427	1552	758	938	2192	1321	1195	662	693	1190	787	857	1155	869	978	101	1049	934	428	1179	1179
186	1527	765	1703	695	2224	2623	2240	1282	634	1298	710	1570	1641	1362	1587	1046	880	875	609	1073		2165	1320	1479	473	1617	1077	1374	1425	923	1024	2134	1236	1119	621	590	1101	866	858	1190	802	817	90	1077	875	279	1165	1025
187	1736	805	1689	904	2095	2404	2363	1548	742	1344	561	1388	1639	1216	1683	1152	959	803	623	1193		2332	1264	1591	490	1472	854	1346	1472	1062	890	2369	1228	1066	570	662	1088	933	771	1149	685	1093	127	1143	837	285	1025	1230
188	1343	811	1563	682	2061	2482	2049	1360	721	1083	526	1390	1479	1116	1552	1107	1005	863	491	1034		2073	1400	1312	470	1638	1037	1588	1497	877	820	2277	1137	1117	465	781	1074	635	596	1138	718	795	142	1123	896	202	991	1170
189	1673	770	1696	650	2165	2497	2392	1166	642	1323	559	1504	1418	1060	1599	850	861	864	630	936		2040	1313	1421	489	1619	873	1463	1413	1028	872	2238	1401	1064	527	522	1189	674	884	1042	796	950	138	1114	916	153	1008	1043
190	1407	977	1714	641	2148	2435	2326	1125	839	1303	661	1357	1687	1195	1546	1167	860	821	542	957		2107	1291	1432	463	1583	961	1439	1397	941	912	2258	1279	1107	419	802	966	795	691	1032	869	906	101	1183	1016	276	873	1089
191	1400	813	1572	556	2004	2379	2220	1197	652	1159	669	1453	1527	1111	1574	733	1053	786	525	1159		2364	1294	1396	519	1638	868	1453	1375	875	829	2211	1458	1028	553	654	1075	817	762	1016	744	822	51	934	898	263	1000	1128
192	1817	835	1593	725	2169	2341	2177	1203	834	1320	701	1318	1534	891	1538	861	819	888	670	1163		2527	1250	1392	504	1586	888	1717	1192	885	831	2418	1277	1154	410	711	1216	848	884	1059	786	821	138	1027	942	245	1130	1064
193	1349	867	1659	723	2117	2271	2277	1040	817	1394	735	1425	1640	1043	1527	981	858	877	427	1031		2260	1179	1792	380	1384	915	1545	1336	887	865	2308	1289	1197	469	801	1052	714	741	988	901	1128	53	1114	981	300	1139	1100
194	1440	871	1637	861	2042	2475	2158	1080	790	1508	634	1386	1600	1173	1499	905	790	840	627	1003		2410	1314	1537	541	1521	1086	1588	1386	980	872	1976	1394	1102	506	713	1014	962	703	1129	675	904	159	1185	1055	291	1015	1042
195	1324	940	1630	989	2130	2174	2046	985	768	1137	712	1464	1418	1019	1469	870	838	807	655	1132		2696	1061	1506	468	1625	1063	1503	1351	950	848	2286	1257	1067	393	633	1194	814	872	1107	757	972	90	1076	867	291	1105	1095
196	1273	912	1612	665	1852	2383	2014	1067	746	1208	808	1321	1490	1129	1580	1005	788	845	511	1183		2402	1194	1394	449	1573	1053	1470	1406	942	889	2255	1280	1075	544	614	1198	735	839	1002	830	655	213	982	916	270	1075	1088
197	1317	875	1746	705	1910	2120	1991	1042	690	1416	872	1480	1530	1033	1457	856	837	623	570	997		2405	1178	1601	432	1634	997	1344	1388	1024	878	2218	1358	1067	585	567	1073	893	885	1007	763	889	118	1038	806	255	1089	1104
198	1438	913	1565	882	1731	2155	1934	1082	685	1335	701	1378	1510	1067	1508	931	727	734	622	1068		2436	1201	1495	557	1408	790	1306	1303	1015	810	2509	1306	1148	481	653	1043	787	711	1063	792	860	172	1088	846	152	1026	1159
199	1420	789	1663	715	1924	2127	1751	1151	779	1346	535	1406	1476	1009	1336	764	865	911	514	1217		2356	1169	1566	562	1591	851	1330	1247	1008	827	2540	1357	1077	397	782	873	828	744	991	721	806	31	1000	858	307	1006	1247
200	1444	852	1732	644	1829	2096	1726	1162	654	1209	629	1351	1505	934	1372	902	732	879	587	983		2369	1152	1501	440	1472	993	1477	1395	1020	878	2424	1306	1189	465	765	895	807	810	1017	812	763	163	989	783	314	1108	1105
201	1468	736	1673	622	1813	1747	1658	1403	645	1374	610	1180	1383	836	1095	987	854	831	533	1046		1971	1247	1575	520	1403	1088	1037	1377	838	872	2474	1126	1099	579	978	996	886	650	1036	787	856	197	934	928	328	1130	1033
202	1377	729	1264	643	1956	1803	1823	1282	602	1292	735	1363	1402	975	1510	923	864	829	621	988		2556	1099	1683	470	1414	1060	1361	1296	800	923	2241	1150	1137	527	761	991	832	722	966	868	777	196	904	876	325	1197	1091
203	1430	832	1491	605	2226	1865	1678	1469	665	1245	654	1286	1363	1006	1122	998	758	714	570	1112		2344	1149	1452	388	1584	964	1332	1342	829	872	2683	1181	1187	323	651	1087	765	625	1045	813	810	156	927	1062	198	1204	1027
204	1365	1004	1491	682	2007	1870	1604	1546	689	1337	787	1366	1543	1092	1205	954	780	738	461	1129		2133	1036	1526	487	1441	1062	1353	1231	961	881	2593	1196	1126	480	584	835	946	725	1025	660	891	278	915	936	306	1169	1064
205	1319	636	1472	619	2191	1596	1634	1469	820	1382	621	1358	1352	998	1276	751	714	911	541	956		2145	1055	1428	423	1450	959	1264	1520	982	706	2366	1325	1047	473	818	1003	753	714	998	783	782	178	990	1055	190	1090	1128
206	1461	943	1507	745	2155	1787	1523	1373	613	1281	654	1359	1394	1015	1172	918	591	767	576	968		1775	895	1679	477	1596	927	1177	1329	928	901	2501	1400	1212	530	454	1028	865	850	1063	663	822	94	884	960	268	1063	1045
207	1286	841	1570	784	2047	1576	1658	1385	742	1416	733	1243	1341	1073	1268	871	690	814	529	1123		2031	1086	1952	419	1541	1275	1253	1408	946	714	2823	1284	1023	519	659	871	835	719	1013	757	1083	153	883	966	248	1041	1145
208	1415	856	1560	643	2092	1667	1431	1293	627	1313	647	1315	1235	944	1208	841	724	748	440	1032		1978	1158	1656	402	1326	876	1278	1289	740	796	2560	1633	987	457	855	1048	754	711	1000	864	773	229	1058	833	246	1272	1144
209	1680	942	1471	523	2153	1738	1365	1428	714	1338	607	1377	1146	1086	1277	859	739	834	569	1055		1714	1003	1619	510	1297	927	1280	1376	762	919	2727	1488	962	406	716	782	791	752	889	751	889	52	912	984	177	1163	1076
210	1393	798	1567	497	2047	1483	1528	1281	624	1331	650	1272	1387	970	1173	667	677	724	577	1200		1794	1038	1765	544	1433	955	1298	1153	929	963	2235	1493	1204	479	620	861	730	946	970	743	765	108	917	870	243	1030	1058
211	1448	678	1521	640	1922	1609	1391	1419	585	1214	706	1218	1408	947	1285	714	680	743	489	1049		1958	1109	1690	530	1252	898	1155	1236	799	877	1863	1418	1126	583	609	772	964	740	949	678	798	188	1093	848	284	1091	1063
212	1324	727	1530	673	2140	1524	1388	1185	571	1132	657	1307	1330	1005	1163	881	566	904	609	1071		2093	1036	1563	433	1226	857	1331	1143	828	809	2014	1170	1116	374	594	715	884	669	932	654	611	106	951	822	223	1102	1026
213	1394	598	1475	575	2067	1505	1262	1240	787	1270	635	1394	1142	1072	1069	734	737	708	595	984		2850	1053	1639	519	1116	788	1088	1210	763	769	1984	1522	1049	366	742	747	812	943	1073	682	749	182	1000	799	195	1000	1047
214	1716	660	1625	549	1941	1482	1215	1107	763	1162	604	1223	1235	1087	1043	577	562	810	403	978		2548	1087	1743	478	1256	715	1020	1273	812	864	1924	1218	1162	603	606	739	770	849	787	655	806	130	968	818	244	1081	1071
215	1398	655	1664	637	1820	1357	1406	1280	758	1280	551	1123	1157	985	992	831	632	792	673	1054		2150	1009	1607	308	995	953	1321	1267	862	790	2089	1358	1189	445	431	707	749	641	911	750	754	172	881	852	297	997	972
216	1372	748	1504	658	1898	1291	1156	1040	536	1254	555	1261	1164	974	1182	704	589	678	503	1079		2685	928	1652	470	1059	747	953	1235	791	782	2169	1359	1196	508	504	805	952	783	1011	739	833	71	962	868	248	1014	1073
217	1260	634	1732	598	1733	1286	1271	1013	702	1116	567	1201	1169	1049	980	829	701	813	567	956		2142	1064	1577	358	1060	735	1095	1173	744	856	2086	1132	1126	427	611	718	667	700	779	562	793	45	802	863	200	1202	975
218	1359	624	1453	669	1545	1291	1198	1148	689	1198	602	1084	1100	956	1143	693	646	857	532	1046		2168	1005	1629	425	1029	904	897	1169	528	750	1987	1092	1056	641	568	930	805	619	889	540	794	35	902	862	154	1000	990
219	1353	654	1612	527	1690	1308	994	1174	714	1169	491	1123	1233	844	993	678	658	805	747	917		2067	985	1760	452	969	906	1033	1155	664	699	2117	1283	1233	389	697	702	790	803	857	631	855	76	1048	916	130	1156	1061
220	1125	680	1496	610	1607	1270	1205	1019	784	1314	654	1057	1342	847	1060	791	562	860	597	933		2009	1015	1556	455	1130	884	957	1049	715	707	1809	1403	1152	577	500	753	716	831	895	749	942	117	692	843	128	953	1000
221	1210	695	1502	678	1490	1344	1170	1018	731	1222	667	906	1258	1057	981	767	602	874	496	967		2153	1226	1671	401	1024	870	1130	1186	747	767	1898	1219	1046	467	408	673	763	903	892	732	815	219	888	940	228	1068	982
222	1177	715	1502	692	1412	1170	1110	1104	600	1183	690	1099	1272	906	895	813	674	932	636	818		2088	989	1656	486	1071	819	859	1108	718	820	1816	1273	1079	489	624	881	766	823	904	665	883	194	857	825	150	841	934
223	1348	798	1494	677	1468	1189	1034	1111	792	996	624	1151	1318	809	1002	791	703	799	652	1028		2266	897	1823	481	991	833	809	937	680	665	1532	1205	947	462	563	767	927	774	872	431	719	53	962	876	228	1133	931
224	1406	754	1542	616	1503	1236	1032	1034	762	1190	599	947	1056	903	839	575	725	600	558	911		2024	1075	1503	367	912	791	824	974	504	707	1894	1186	1091	512	676	700	799	759	869	736	855	175	983	818	75	984	1022
225	1358	667	1486	640	1401	1155	965	1023	808	1068	657	1144	1106	1086	792	808	584	1011	542	961		2000	956	1758	366	944	722	983	1092	723	693	1786	1262	1148	477	487	759	834	809	917	730	659	21	786	922	-16	885	1043
226	1263	680	1489	628	1294	1173	1079	928	706	1215	650	1144	1316	949	793	768	669	842	570	962		2161	969	1577	486	895	710	874	808	569	718	1766	1014	1076	422	597	714	849	831	824	682	829	144	1024	853	202	972	834
227	1248	511	1587	649	1637	1119	1050	930	597	1362	696	881	1083	1065	998	832	613	806	451	889		2117	1082	1503	371	942	744	775	1004	638	747	1745	1256	796	513	639	631	657	832	932	691	789	21	962	786	141	1015	1009
228	1344	590	1421	749	1361	1165	998	958	521	1160	642	959	916	993	727	740	552	735	506	1054		2159	963	1614	301	876	796	985	1124	787	580	1292	1250	1154	353	397	672	755	669	817	615	751	0	830	767	115	919	1023
229	1292	604	1463	514	1412	1030	1103	862	718	1072	649	1022	1053	990	888	622	650	764	585	924		1882	912	1461	369	863	749	966	869	545	636	1254	1057	1057	542	579	869	820	769	870	732	706	155	955	867	124	807	870
230	1330	866	1506	726	1459	905	964	909	735	1365	588	1039	1191	983	985	689	610	887	448	946		1796	931	1574	257	906	758	845	875	644	820	1307	982	1182	450	685	866	758	696	938	657	740	250	898	703	151	878	1085
231	1171	825	1590	680	1383	976	992	897	685	1213	656	889	1197	1002	876	656	581	760	531	1043		1911	1112	1566	398	926	700	917	961	657	688	1563	1074	1227	348	645	717	719	630	818	649	809	71	899	871	266	850	1205
232	1246	753	1454	594	1145	946	1099	838	644	1240	661	940	1134	903	796	747	581	852	592	977		1710	1032	1603	473	950	928	943	1153	681	717	1493	1080	940	489	566	615	807	757	827	537	816	15	945	815	196	967	1003
233	1343	705	1426	630	1373	1041	988	732	695	1312	625	986	1053	1146	791	648	603	686	529	1039		1767	1031	1577	489	876	701	873	944	575	873	1539	1115	1266	283	510	796	888	791	765	557	631	20	930	934	84	998	1010
234	1305	837	1392	647	1004	975	986	942	846	1176	666	949	1233	882	827	609	679	657	607	1028		1473	956	1610	176	814	752	904	883	605	665	1419	1168	1203	351	521	623	805	870	932	633	722	175	850	815	172	734	982
235	1513	767	1350	667	1105	1004	1134	850	706	1149	610	1131	1074	974	955	729	557	790	475	961		1677	970	1636	463	858	846	823	936	581	729	1321	1174	1087	408	592	547	863	841	695	656	705	107	967	838	156	1095	1012
236	1252	822	1459	504	1403	1043	912	862	614	1207	608	1006	1051	1053	812	532	754	762	576	1054		1676	1080	1511	546	899	744	867	931	702	620	1216	1186	1050	367	406	658	759	727	805	559	628	196	799	830	206	1027	1074
237	1365	746	1250	659	1164	893	835	900	660	1136	551	934	1323	952	778	599	508	811	475	956		1531	874	1557	265	696	769	648	924	498	761	1235	962	1053	496	460	677	720	846	774	742	743	140	880	800	193	842	1106
238	1247	874	1516	624	1300	954	922	734	776	1234	607	952	1097	882	877	789	549	751	576	834		1538	936	1450	397	669	628	802	745	459	920	1179	1033	1227	416	582	680	959	685	939	693	742	-72	785	799	225	935	999
239	1283	768	1534	635	1079	1029	860	786	743	1156	666	852	1155	1058	854	811	598	783	458	1150		1594	944	1542	513	917	727	900	1007	618	768	1292	1161	1121	541	419	661	925	901	878	701	811	89	874	1003	189	816	932
240	1348	764	1508	719	1315	995	963	786	810	1106	692	1007	1315	866	938	708	448	640	406	935		1404	1076	1568	512	736	690	819	870	636	735	1274	1052	1232	362	606	613	950	667	881	662	630	134	856	799	91	892	932
241	1328	703	1441	673	1162	1020	974	677	578	1197	655	746	1263	1159	1002	535	604	961	525	1071		1554	939	1465	427	789	738	789	829	586	738	1156	967	1127	541	604	548	984	856	889	549	696	226	1061	844	94	957	1059
242	1335	685	1574	686	1136	1016	962	769	630	1158	614	725	1165	914	1022	650	679	731	445	1053		1481	928	1492	550	754	824	745	856	534	725	1329	994	1077	577	454	821	675	790	684	699	606	218	841	722	181	886	984
243	1156	794	1609	691	1218	1024	957	799	699	1033	569	1013	1054	916	826	669	576	832	486	975		1264	932	1475	441	879	670	851	835	671	870	1152	927	1025	574	633	771	825	745	881	599	804	2	893	870	133	979	1109
244	1378	637	1565	486	1013	994	851	750	675	1135	559	900	1023	1058	893	607	592	797	429	1057		1437	962	1472	283	643	791	718	742	662	776	1091	1285	1057	315	569	824	784	699	736	655	760	127	933	684	146	792	1047
245	1250	746	1480	666	1105	960	843	704	665	1139	607	816	1087	878	792	607	527	846	462	1001		1405	932	1664	389	772	738	782	1018	686	796	1302	1091	1112	379	461	546	778	639	780	619	778	133	867	778	157	978	811
246	1359	712	1588	733	1295	979	974	690	700	1121	515	739	1067	1119	753	618	496	602	511	878		1283	1053	1669	367	713	651	813	821	641	694	1213	970	1066	495	604	514	909	688	896	552	734	126	872	824	113	837	982
247	1434	625	1364	702	1275	914	919	810	719	1048	629	949	1010	919	923	628	701	770	541	1015		1236	902	1610	499	794	647	878	1001	622	802	1088	921	1027	419	462	816	645	688	624	673	775	80	955	921	96	925	1038
248	1309	635	1424	598	1294	879	807	789	851	1249	731	861	1027	1140	679	689	554	742	538	990		1160	976	1525	602	667	748	821	912	592	637	1107	917	1057	338	437	827	728	720	911	685	736	270	1015	806	201	930	1083
249	1269	667	1466	683	1210	930	849	592	715	1168	638	963	892	931	793	722	525	622	306	762		1271	914	1420	296	729	605	752	906	637	599	1152	980	1011	376	394	577	641	689	816	703	576	6	933	841	123	872	1002
250	1298	703	1357	608	1150	827	1040	619	667	1182	638	970	1156	976	789	479	552	761	505	940		1267	855	1552	399	684	826	843	1022	597	762	1134	899	1188	382	691	665	705	773	796	669	679	202	750	748	86	1027	971
251	1220	568	1379	721	1227	917	795	665	727	1185	588	916	1049	873	640	444	619	798	659	901		1223	867	1628	366	663	732	838	834	627	711	964	1139	1106	581	520	667	832	883	918	611	1006	63	790	858	106	863	904
252	1164	718	1342	647	1315	876	701	741	814	1250	687	990	1139	923	751	730	648	829	573	1008		1170	844	1634	374	900	689	599	760	568	806	1078	1192	1180	343	487	671	770	844	790	547	656	221	854	809	62	935	1081
253	1399	736	1437	633	1069	1022	839	635	706	1120	682	961	1194	1006	712	755	561	787	442	1029		1077	961	1562	411	731	885	738	896	694	792	1158	1085	1086	445	504	582	774	900	862	522	791	107	756	792	258	975	949
254	1593	725	1406	594	1340	810	853	666	796	1225	643	792	987	1070	773	621	540	956	660	1049		1107	1079	1745	519	800	685	679	806	616	733	1020	941	967	531	673	669	729	858	888	536	752	9	924	812	66	889	911
255	1326	610	1633	574	930	830	796	727	767	1187	564	873	1014	983	642	735	657	603	699	1005		1140	848	1584	457	709	565	831	778	686	770	1119	1092	1067	476	523	623	804	761	722	688	593	201	893	803	185	828	1029
256	1250	746	1557	646	1010	954	825	725	762	1077	579	835	1218	1057	661	625	551	748	576	990		1214	926	1698	437	718	800	802	828	612	657	1023	1165	965	547	497	651	832	717	755	516	828	109	883	844	177	1099	904
257	1311	728	1443	721	1067	754	665	711	647	1037	556	830	1240	926	815	708	607	916	455	996		1161	842	1467	452	553	502	825	788	651	695	1089	905	1025	350	693	884	795	659	715	488	651	3	962	997	150	947	1001
258	1193	628	1457	610	1099	1063	858	635	598	1122	663	907	975	1013	791	625	584	862	485	1005		1074	990	1463	386	624	895	802	831	623	672	1100	1126	1044	481	594	637	869	646	745	603	604	84	868	853	178	870	1049
259	1329	728	1529	599	955	1059	902	727	799	1101	574	797	891	988	799	528	477	863	517	904		1058	942	1695	411	812	741	762	836	671	746	1075	861	1032	534	464	673	645	705	669	659	665	149	943	789	117	785	986
260	1313	554	1408	670	1084	1013	829	727	626	1182	527	911	1166	939	936	632	494	712	477	1041		1179	1052	1480	515	653	788	750	840	541	777	1077	1110	1125	509	555	663	781	762	810	659	686	261	999	840	102	975	1093
261	1428	652	1492	585	1084	937	834	631	782	1303	637	904	979	1106	706	664	561	896	505	933		1151	996	1559	354	815	711	805	952	550	786	955	1004	1101	540	597	793	860	603	825	567	662	130	913	837	122	870	921
262	1299	630	1458	673	1221	827	725	840	772	1074	481	965	1162	1096	830	655	679	658	554	1043		1024	957	1621	381	777	729	866	790	639	675	1043	983	960	546	683	663	676	741	720	561	672	117	853	967	137	970	1021
263	1246	652	1534	712	1136	977	811	648	644	1299	537	813	1037	1029	919	681	637	853	517	900		1044	931	1544	454	623	840	813	776	540	556	1042	869	1016	404	482	633	819	957	886	674	800	131	839	912	164	924	1125
264	1365	717	1630	542	1233	1042	643	623	770	1157	535	877	1077	1034	764	746	550	838	585	1018		1080	903	1579	363	734	788	868	876	551	868	1174	779	1200	561	601	523	624	811	790	663	724	187	864	839	239	970	1042
265	1219	772	1545	661	1098	971	929	716	648	1180	659	846	919	967	917	744	589	724	564	1001		1222	1058	1642	440	805	715	600	813	626	716	915	887	1026	453	691	629	748	712	725	582	634	94	1018	1007	120	899	972
266	1250	509	1453	578	1172	1053	818	711	864	1110	514	903	1166	1117	935	666	482	743	566	885		1069	925	1577	425	671	707	761	834	589	710	833	766	1199	372	454	583	779	973	744	701	831	77	909	1048	84	833	1084
267	1211	723	1492	647	1206	952	639	645	666	1057	535	871	1048	981	847	764	479	759	533	938		1142	1110	1448	313	788	587	858	803	715	676	844	1104	1045	544	616	602	711	862	749	622	631	203	871	937	197	851	983
268	1182	640	1434	619	1236	900	697	757	693	1120	644	830	967	988	758	709	600	679	437	1110		991	1075	1521	506	702	670	870	792	675	752	970	969	1015	252	449	720	820	679	983	650	720	314	917	898	140	834	956
269	1303	673	1507	596	1063	1018	546	708	698	1157	546	978	1165	1005	995	711	575	896	598	1053		1174	939	1510	273	738	785	692	865	663	723	1011	1065	1151	594	551	530	717	829	688	700	883	42	812	886	270	878	1001
270	1238	759	1498	498	990	1098	815	645	669	1157	630	783	1065	1084	889	555	585	743	401	732		796	941	1612	409	729	759	757	601	481	644	1121	961	974	512	497	616	827	883	828	661	780	10	963	1111	179	915	1070
271	1217	746	1460	743	1193	962	566	725	726	1175	641	852	1124	847	811	580	621	847	518	1041		1104	1098	1485	471	680	920	732	801	652	522	930	862	987	319	395	629	692	764	737	672	785	146	1051	629	195	824	973
272	1243	693	1401	634	956	1110	687	730	678	1225	543	719	981	1064	783	748	478	695	400	964		950	963	1491	486	636	611	749	854	681	563	936	841	1053	370	481	507	765	673	850	632	679	9	949	815	201	905	998
273	1158	770	1271	595	1126	1034	638	644	658	1053	633	733	1179	952	813	608	500	845	498	916		1093	961	1406	447	683	692	714	852	630	717	1018	899	1067	569	581	565	634	698	776	608	667	215	898	818	168	816	928
274	1233	554	1303	678	1231	1098	685	658	591	1135	444	877	1218	1099	908	753	494	759	523	943		1018	1127	1417	576	820	763	823	845	483	800	887	915	1130	447	549	658	843	657	728	625	758	330	1017	909	52	876	1142
275	1304	739	1485	601	931	1059	581	617	740	1150	515	755	1040	989	774	868	394	728	419	856		872	796	1428	573	597	863	910	754	668	758	947	880	972	503	603	489	747	800	760	689	913	146	928	689	241	905	999
276	1346	634	1450	579	1214	962	869	657	721	1058	551	867	1196	957	810	651	605	797	526	777		1069	854	1349	344	760	799	872	746	634	693	955	989	1046	463	289	581	694	914	877	643	697	127	950	903	127	968	1085
277	1246	675	1570	731	1157	999	764	594	789	1191	522	995	1019	1188	752	697	519	773	607	1001		1090	908	1526	387	660	665	690	718	660	800	1004	851	1083	615	456	740	604	916	784	627	742	161	897	1063	182	1044	1117
278	1168	680	1128	714	1196	914	937	638	584	1113	645	952	1058	948	932	731	554	968	601	1062		908	1075	1429	368	755	695	877	838	670	654	925	1026	1150	298	442	655	843	740	721	623	773	123	881	802	172	859	986
279	1108	725	1448	590	1081	1070	835	738	618	1110	739	842	1099	965	854	685	512	759	467	1020		1182	1002	1396	206	746	887	710	762	572	707	948	1080	961	502	495	550	910	820	743	639	894	179	759	951	134	970	965
280	1250	559	1423	664	1118	989	772	756	640	1246	644	822	1243	1081	801	646	420	700	461	1078		1071	961	1506	338	721	857	853	707	481	837	964	888	927	491	406	592	853	812	751	506	1053	298	842	825	276	861	1020
281	1168	563	1281	700	1107	1068	808	744	640	1162	637	729	1018	899	694	694	637	768	578	885		931	1082	1491	406	763	651	806	686	705	751	998	876	985	492	492	599	722	776	752	559	575	121	867	884	206	917	1148
282	1271	603	1532	555	1178	1127	597	784	716	1124	615	863	1174	934	718	666	590	811	461	872		902	980	1518	365	812	773	780	797	643	876	855	853	1153	421	528	666	683	644	727	670	582	146	794	901	59	1002	948
283	1154	592	1402	396	1049	1075	589	657	793	1185	569	816	1035	983	748	637	618	816	506	975		1099	856	1269	404	688	814	716	800	567	634	1036	903	1123	457	732	519	783	721	808	659	890	124	878	841	148	849	1070
284	1334	713	1422	802	1222	973	681	576	720	1147	499	804	1101	997	770	675	480	670	470	912		1077	917	1451	377	836	830	760	856	670	685	849	824	1005	449	412	671	602	807	628	632	822	116	854	895	124	821	929
285	1504	695	1467	895	1163	1039	734	641	707	1164	506	1039	1082	1136	640	760	424	752	516	1004		877	1138	1435	369	660	827	865	743	575	752	991	955	1149	563	653	728	787	846	776	708	793	84	996	919	111	846	1121
286	1158	576	1387	790	1128	911	845	714	715	1174	544	701	1067	965	736	772	519	854	585	1094		856	1071	1285	454	759	875	872	751	644	638	776	943	1090	490	572	615	501	717	806	670	708	165	983	884	184	821	981
287	1634	691	1416	758	1357	944	687	633	701	1156	554	956	1121	952	468	693	615	837	521	1033		953	1062	1473	411	761	923	736	859	536	653	1001	932	973	575	615	750	816	728	733	620	718	176	979	877	156	983	1109
288	1189	634	1504	770	1082	962	760	667	863	1089	640	876	977	996	608	718	491	964	536	848		906	1046	1411	260	661	680	853	810	605	696	947	899	1067	442	255	690	616	769	858	538	797	200	981	865	175	957	1025
289	1189	605	1478	694	1174	1021	560	705	742	1091	665	1064	1000	929	705	604	537	883	536	905		1025	921	1297	480	775	795	737	836	580	618	943	1001	1113	541	475	720	868	933	779	709	792	236	848	1053	116	865	1011
290	1195	615	1543	731	1211	1180	831	716	744	1172	594	925	1164	959	553	804	514	692	474	1065		1049	899	1312	347	739	872	827	793	487	851	923	867	1129	423	634	705	851	947	759	658	809	104	887	839	105	918	1111
291	1285	632	1400	609	1154	980	803	767	632	1155	511	915	1269	887	640	739	637	866	651	823		879	877	1441	381	792	1007	753	833	670	717	872	977	1063	367	468	468	762	816	619	611	783	80	939	858	237	994	1079
292	1172	610	1504	746	1049	1039	730	692	881	1023	490	895	1127	1003	707	787	586	869	500	921		838	855	1246	441	622	659	667	822	511	842	1124	981	1066	496	466	480	731	737	792	543	953	138	955	894	67	890	971
293	1369	667	1364	658	1181	949	774	695	775	1223	637	693	1092	940	638	665	487	861	485	957		914	937	1342	434	770	677	687	746	708	542	1016	904	1074	412	477	622	719	981	779	597	986	231	927	943	106	870	1068
294	1072	822	1566	693	1079	1039	810	644	600	1229	532	870	1054	942	664	797	541	863	567	885		999	997	1215	402	520	853	724	876	501	768	913	956	978	482	573	683	732	919	833	705	616	90	737	875	145	916	955
295	1215	663	1444	631	1274	997	773	681	724	1115	605	798	1008	941	665	596	523	839	620	1015		923	1034	1245	455	718	769	841	810	691	647	878	816	1030	412	418	679	546	874	818	637	696	203	781	761	135	911	1070
296	1481	878	1406	619	1167	973	825	558	676	1182	553	887	1235	940	698	704	573	726	469	1002		971	1001	1221	374	669	832	794	796	656	582	1131	892	1078	522	486	538	670	879	845	687	655	146	937	1032	141	915	1030
297	1398	729	1257	572	1170	1073	810	628	716	1020	539	866	1097	1045	666	684	624	914	462	869		973	887	1365	417	686	754	866	714	564	1001	917	1193	1152	435	435	726	761	658	659	708	795	143	947	716	-3	1009	894
298	1189	713	1555	592	1047	1098	767	691	702	1257	512	878	1184	1051	775	721	602	822	494	1066		900	878	1258	263	888	829	771	802	844	773	838	914	958	521	432	706	713	795	756	725	713	148	935	862	149	902	913
299	1156	638	1511	636	1176	969	755	656	622	1224	555	656	1116	980	771	774	585	779	423	1065		939	917	1278	185	785	712	844	728	708	802	1230	851	1085	536	500	729	670	807	878	579	738	251	790	1096	8	919	1035
300	1131	661	1552	652	1220	1052	741	675	625	1224	470	879	1153	896	768	770	550	883	519	975		818	960	1180	296	752	786	711	892	663	689	1019	831	1040	494	558	648	776	839	786	644	849	247	854	825	179	1061	1036
301	1349	767	1573	561	1228	985	758	585	625	1116	536	783	1114	946	703	651	545	746	588	827		946	943	1387	408	772	873	879	694	562	684	969	975	1130	427	329	789	719	723	768	539	789	45	1013	768	215	933	945
[truncated: 202 more columns]

## Sheet: WT, unc7, unc9
Figures 2D
AIA::GCaMP5A F(A.U.)
Stimulus:	1.15 µM diacetyl
Genotype:	WT
N:	1	2	3	4	5	6	7	8	9	10	11	12	13	14	15	16	17	18	19	20	21	22	23	24	25	26	27	28	29	30	31	32	33	34	35	36	37	38	39	40	41	42	43	44	45	46	47	48	49
Frame (Pulse at 100)
1	1575	830	1378	1457	849	1296	1510	1637	696	606	991	878	970	351	2046	617	1039	615	2131	1013	1445	1212	818	999	1526	1289	779	673	662	1078	771	987	396	2095	492	1106	577	1549	1035	809	1390	1076	937	1107	1123	759	1277	1050	681
2	1774	733	1507	1387	807	1235	1258	1152	788	509	750	1017	906	344	2108	599	837	575	2185	893	1464	1472	855	970	1558	1207	802	696	621	921	809	1067	478	2145	328	1238	583	1715	1213	1017	1474	1089	827	1012	1029	814	1155	1175	817
3	1588	853	1449	1288	865	1374	1336	1147	648	686	868	957	991	505	2036	575	827	530	1798	876	1216	1366	902	1114	1392	1412	711	664	667	958	798	957	441	2121	527	1232	519	1642	1616	689	1451	1191	858	1016	1287	746	1196	1167	782
4	1598	941	1599	1200	723	1410	1279	1510	868	649	827	771	892	462	2080	468	807	860	1887	909	1494	1589	837	1088	1575	1115	738	759	708	908	749	1123	457	1994	347	953	710	1536	1143	838	1428	1059	718	1201	883	769	1124	1089	552
5	1636	840	1508	1122	817	1318	1348	1203	729	582	833	942	891	268	2218	489	976	673	2134	1247	1508	1471	805	1203	1434	1415	748	637	634	861	918	1273	364	2073	306	1239	517	1484	1087	987	1399	1200	736	1255	1094	991	1094	888	735
6	1561	873	1226	1188	814	1284	1326	1094	874	602	705	1038	879	372	2163	557	916	602	2130	971	1747	1343	995	1012	1395	1476	872	570	977	800	826	1014	581	2072	450	1092	618	1655	1371	802	1396	1208	749	1199	1055	860	1215	1048	768
7	1366	739	1590	1153	802	1444	1552	1106	878	591	636	844	938	442	2231	419	1018	588	2171	970	1683	1489	875	1101	1362	1233	748	641	826	832	784	1035	447	1954	421	1136	694	1574	1444	920	1469	963	862	1043	1224	759	1059	1087	833
8	1506	931	1562	1228	802	1280	1346	1157	919	858	769	841	936	382	2178	441	452	412	1893	879	1418	1382	862	1146	1325	1088	733	854	570	901	807	1136	460	2138	340	1132	479	1552	1428	977	1350	842	905	1061	1175	811	1246	939	709
9	1780	945	1232	1239	847	1421	1502	1089	732	690	811	830	919	197	2098	559	968	504	2066	847	1464	1400	856	1153	1492	1225	817	636	790	976	843	1174	490	2157	309	1302	682	1576	1048	608	1601	1107	867	933	1193	657	1131	1130	905
10	1621	913	1179	1425	856	1213	1221	1194	790	461	799	784	1022	246	1956	498	1154	571	1930	809	1408	1389	847	1158	1606	1108	895	719	504	837	759	982	379	1999	465	1065	579	1548	990	892	1398	946	806	1005	1007	617	954	1021	580
11	1478	796	1284	1224	822	1303	1379	1180	725	586	721	830	964	388	2093	521	1032	478	2174	1046	1606	1426	759	1200	1361	1385	790	613	800	778	884	1067	436	1910	520	1163	637	1619	1136	702	1398	945	780	1130	1182	913	1285	1041	726
12	1418	999	1532	1356	794	1384	1235	1171	761	899	801	999	817	358	2105	606	1000	548	1973	937	1584	1414	773	1139	1359	1224	782	773	665	899	944	1112	606	2063	422	1160	608	1638	1463	897	1416	922	908	1192	1125	939	1079	996	615
13	1682	892	1282	1308	892	1336	1329	1161	802	594	714	664	832	429	2051	473	918	535	1796	715	1355	1565	1059	1256	1519	1103	773	647	942	953	749	1054	361	2069	437	1214	698	1628	1141	865	1372	824	869	1183	1178	913	1102	945	833
14	1574	809	1265	1151	771	1202	1437	971	857	759	745	783	978	323	2288	639	885	574	1572	837	1616	1380	862	1076	1464	1054	751	557	893	810	723	945	253	2258	451	1025	639	1607	1037	862	1393	874	724	962	1180	935	1081	1209	599
15	1368	921	1461	1373	705	1345	1354	1193	835	526	844	822	955	397	2112	553	981	407	1677	879	1643	1431	833	1104	1443	1374	781	599	791	899	820	1168	543	2103	412	1180	646	1613	1023	831	1495	1141	972	1101	1047	794	1016	929	712
16	1603	936	1271	1325	793	1515	1378	1016	801	722	630	865	913	358	1949	529	1033	434	1863	930	1738	1465	806	1131	1370	1210	970	773	909	930	818	1071	539	2145	323	1065	547	1666	1386	848	1589	1177	917	934	1183	757	1136	1080	600
17	1696	811	1368	1571	869	1198	1395	1205	826	666	718	974	901	357	2123	517	837	532	1821	802	1424	1440	901	1123	1511	1264	745	630	747	660	757	1040	473	2104	512	1187	516	1501	914	810	1378	963	865	1348	1100	825	1170	929	680
18	1872	850	1254	1216	824	1368	1210	1148	861	497	938	913	922	373	2217	403	1005	660	1729	886	1490	1297	805	1094	1529	1315	879	632	708	899	863	1068	357	1983	340	1057	498	1615	1237	809	1634	1048	854	923	1163	782	904	948	735
19	1529	787	1652	1223	768	1391	1326	1079	818	684	819	810	918	446	2022	598	968	820	1963	910	1375	1422	957	1111	1544	1335	828	683	902	901	874	1049	372	2106	385	1094	617	1458	1493	875	1412	960	916	938	1261	771	1151	1047	654
20	1678	665	1261	1368	746	1426	1534	1138	780	615	945	980	865	243	2123	525	777	521	1701	893	1462	1331	783	1181	1370	1425	949	585	779	761	756	1065	508	2093	475	1036	662	1598	1293	733	1365	844	723	1206	989	728	1086	1106	705
21	1718	910	1362	1246	940	1316	1515	1214	815	679	862	993	946	336	2122	537	911	488	2086	809	1444	1409	909	1222	1547	1342	764	775	750	891	934	1242	298	1971	482	1104	533	1642	1063	688	1197	895	907	1039	1037	821	1024	1165	691
22	1405	834	1286	1260	885	1324	1315	1122	752	550	893	824	928	347	2054	498	1040	570	2234	888	1465	1496	909	1193	1503	1227	790	787	653	894	750	1053	422	2217	442	1105	607	1565	1317	790	1377	1097	807	898	1146	839	982	1131	629
23	1640	794	1441	1521	749	1314	1271	1359	763	656	755	926	960	343	2171	571	965	704	1868	965	1636	1446	922	932	1637	1385	945	586	861	885	957	1201	505	2158	346	1076	507	1673	891	887	1573	1106	857	981	1094	831	1173	962	694
24	1685	981	1538	1271	692	1301	1254	1167	638	647	726	1017	997	483	2076	580	956	670	1796	902	1511	1521	761	1119	1524	1357	881	600	801	848	824	1163	405	2137	486	1145	561	1680	1473	833	1372	1163	838	1117	1161	776	1189	950	763
25	1420	940	1394	1427	850	1276	1229	1127	787	804	889	1057	818	411	2053	441	1139	457	1712	768	1427	1529	806	1219	1474	1439	789	733	703	909	777	1097	417	2090	351	1076	423	1554	1310	848	1496	1175	811	1030	940	669	1233	1131	731
26	1469	956	1376	1235	681	1187	1313	1133	619	882	936	843	954	380	2277	355	1060	656	1716	932	1458	1481	776	1080	1639	1390	824	613	814	979	686	1115	484	2062	475	1040	609	1611	1575	858	1458	940	781	1001	975	878	986	1024	712
27	1605	835	1315	1305	760	1302	1539	1058	714	620	752	878	1072	601	2220	428	934	576	2136	1011	1434	1414	872	1194	1540	1340	807	718	792	653	788	1108	587	1997	545	1091	605	1431	1072	841	1397	1025	1025	1123	1290	888	1276	1143	755
28	1622	651	1357	1422	732	1401	1312	1184	731	589	907	855	1069	381	1968	453	929	532	1832	831	1459	1321	803	1267	1451	1388	871	589	808	819	884	1102	366	2209	177	937	545	1717	1347	782	1497	1129	849	1343	1024	770	1006	957	625
29	1635	917	1592	1339	750	1201	1365	1389	851	567	686	944	967	341	2051	512	900	543	1986	869	1622	1392	917	1284	1280	1104	736	663	756	930	768	1066	440	2101	424	990	640	1514	1137	765	1472	1062	872	1143	1052	694	1120	1053	812
30	1602	778	1375	1383	902	1266	1465	1161	814	838	742	928	935	303	1958	470	780	507	1772	850	1420	1398	926	1207	1539	1127	868	595	655	785	731	1103	442	1931	433	1168	508	1579	1517	854	1311	991	980	892	1107	861	1027	1063	643
31	1671	943	1406	1481	886	1275	1327	1135	836	950	1037	963	963	373	2056	520	985	581	1675	817	1367	1529	910	1207	1549	1155	832	639	669	999	862	1162	416	1988	446	1006	631	1591	1539	817	1393	1213	846	1135	996	770	949	933	839
32	1685	684	1330	1379	753	1338	1583	959	754	519	880	811	1035	423	1980	582	1139	552	1937	902	1553	1298	887	1097	1387	1073	727	735	787	1081	817	1155	284	2192	477	1078	482	1514	1298	727	1403	824	990	1134	1079	780	770	959	867
33	1616	910	1310	1363	724	1209	1479	1172	835	748	700	698	853	137	2144	535	1084	581	2007	1200	1370	1345	1016	1236	1458	1209	873	603	828	903	863	1165	609	1976	487	1083	666	1547	1150	888	1507	1022	860	1064	1223	702	1143	1055	739
34	1710	988	1333	1429	811	1318	1486	1179	871	675	908	959	974	346	2012	591	880	692	1935	941	1391	1329	878	1018	1482	1440	830	735	739	809	748	1252	484	1895	436	1013	580	1621	1459	983	1309	1018	928	1319	1074	901	1132	998	677
35	1694	863	1527	1438	798	1387	1406	1373	762	616	920	995	906	427	2090	437	1022	595	1904	916	1660	1269	903	1006	1526	1105	821	634	796	775	807	1268	278	1985	328	1161	714	1527	1175	798	1365	1104	761	1201	1041	814	1154	1109	641
36	1428	902	1276	1432	834	1244	1541	1149	866	642	861	968	946	464	2097	444	995	630	1967	876	1404	1321	757	910	1492	1124	707	528	782	806	743	1022	493	2240	342	1110	644	1527	1191	888	1437	886	890	1007	1193	687	1117	1017	778
37	1717	897	1314	1215	863	1296	1399	1259	877	504	609	815	936	392	1958	494	977	579	1489	909	1319	1496	961	1215	1411	1226	735	649	654	811	758	1230	614	2100	464	996	517	1586	1485	898	1453	986	825	1250	1032	810	1211	1037	881
38	1779	959	1319	1275	776	1230	1564	1223	811	828	714	1012	968	316	2101	525	992	531	1794	872	1363	1262	892	1149	1452	1095	619	571	761	941	622	933	493	1928	672	1117	671	1554	1469	874	1430	1046	839	1256	1033	780	1130	995	788
39	1537	845	1245	1353	776	1328	1507	1032	760	547	862	857	898	373	2040	562	958	620	1638	863	1462	1335	931	1179	1362	1195	712	581	807	821	818	1235	399	2006	350	1192	529	1620	1431	961	1316	971	906	1021	1105	780	1135	1200	733
40	1739	1047	1259	1388	808	1343	1568	1061	798	825	856	920	1054	445	1931	567	1023	612	1737	844	1449	1382	777	1192	1599	1300	808	702	676	694	648	1229	466	2139	528	1144	541	1564	1194	836	1367	1248	756	1037	1193	865	1080	941	608
41	1580	918	1347	1190	800	1201	1550	1110	628	523	787	948	1047	411	1908	457	1038	551	1749	800	1567	1228	934	1072	1367	1080	807	623	822	781	863	1152	455	2064	414	1061	680	1667	1442	876	1349	1060	663	1053	991	938	1056	1104	865
42	1669	973	1371	1257	689	1288	1487	1328	791	548	896	1072	913	466	1957	493	1006	438	1929	924	1492	1504	853	1137	1472	1070	827	775	822	843	755	1113	444	1965	569	1143	517	1529	1406	768	1511	1008	1003	903	1034	890	1136	921	771
43	1662	1008	1273	1535	998	1237	1429	1336	787	686	890	757	976	405	2128	491	991	654	1578	939	1480	1433	826	1205	1299	1281	818	737	550	961	918	1151	462	2203	471	1147	606	1687	1179	733	1427	1055	893	1089	1033	844	1163	1064	804
44	1645	799	1398	1378	878	1277	1690	1016	867	600	853	851	780	359	2152	525	943	479	1526	924	1357	1413	873	1251	1252	1299	802	632	787	809	779	1175	451	2122	499	1226	626	1639	1177	715	1346	1083	852	1017	1167	636	1001	906	664
45	1750	918	1267	1291	718	1379	1600	1202	914	928	677	836	817	475	1976	473	1033	614	1546	942	1330	1278	915	1159	1320	1340	747	680	738	1029	843	1098	366	2179	415	1149	750	1561	1462	772	1493	907	794	1000	1128	791	1115	1012	776
46	1453	845	1370	1404	945	1339	1458	1148	793	608	775	907	954	284	2167	609	1086	490	1620	835	1559	1400	1113	1159	1506	1193	776	662	735	847	941	996	530	2134	380	1115	539	1609	1449	752	1519	1092	975	1155	1121	827	1298	890	869
47	1741	796	1197	1328	758	1319	1401	1187	657	639	801	807	982	366	2123	602	943	570	1968	837	1479	1225	1153	1039	1428	1520	772	536	705	1014	619	1024	347	1991	456	1074	664	1534	1090	807	1296	1120	783	1092	1125	779	1080	1078	785
48	1548	857	1333	1395	885	1235	1603	1195	728	511	857	891	927	338	2043	530	1044	698	1845	882	1463	1160	1128	1194	1373	1324	781	603	821	926	813	1024	437	2131	441	1195	538	1534	1403	823	1300	1039	1032	1103	1144	680	1051	1021	891
49	1613	804	1728	1218	886	1228	1484	1113	722	602	725	843	901	354	1851	590	1032	785	1752	958	1826	1320	962	1068	1292	1305	806	719	835	831	1074	1155	382	1938	400	997	544	1747	1463	776	1274	1116	1010	1130	1130	702	1139	955	634
50	1894	880	1216	1233	838	1334	1631	1165	767	574	1009	848	869	449	2141	457	998	431	1685	988	1402	1480	1128	1256	1357	1299	765	773	803	754	1045	1030	349	2226	341	1209	484	1600	1185	710	1417	980	894	942	1203	943	1108	1012	695
51	1933	1016	1413	1471	888	1165	1399	1195	815	464	663	876	869	328	2068	422	1032	562	2226	930	1407	1250	924	1123	1484	1090	730	615	670	827	823	1206	523	2124	374	1066	512	1667	1427	722	1458	1153	994	1132	977	806	1002	1192	744
52	1553	934	1391	1438	871	1263	1644	1086	783	585	880	786	1059	430	1974	406	980	645	1926	1013	1531	1301	1079	1135	1481	1300	770	732	672	841	864	1157	456	2064	470	1123	423	1602	1044	942	1314	914	835	1086	1104	923	1265	1172	734
53	1585	935	1385	1224	809	1370	1598	1201	747	668	645	976	1211	434	2096	498	1009	526	1932	942	1491	1273	1036	903	1297	1279	761	667	711	991	734	1258	331	2346	300	1055	577	1562	1476	798	1433	1107	974	940	1056	774	1098	1080	734
54	1803	936	1310	1192	829	1372	1541	1271	780	498	852	951	933	435	1983	517	1040	546	1671	880	1379	1165	974	1238	1260	1159	771	663	704	873	811	1078	561	2250	578	1030	496	1787	1467	798	1563	928	905	927	1180	740	967	915	808
55	1575	894	1204	1488	820	1190	1549	997	897	721	722	873	918	399	2094	540	1114	393	2063	721	1544	1422	1165	1148	1322	1132	920	573	774	646	883	1026	540	2328	323	1098	439	1701	1465	865	1304	1002	846	1023	1171	791	1109	1101	795
56	1702	838	1292	1243	889	1282	1574	1149	852	743	908	871	995	550	1989	425	998	830	1680	799	1521	1140	1132	1180	1339	1376	907	565	685	954	856	1069	426	2208	476	978	612	1581	1098	858	1390	1031	874	1093	1153	798	1143	1122	709
57	1712	740	1329	1313	788	1499	1562	1158	679	830	909	997	1017	378	1933	402	898	700	2083	835	1742	1338	1110	972	1355	1255	784	723	761	885	815	1351	479	2179	424	1044	579	1617	1273	1043	1251	1183	843	956	1115	876	1063	1002	733
58	1487	843	1333	1465	880	1346	1519	1365	831	642	848	888	926	254	1941	555	976	543	2012	825	1371	1454	909	1158	1405	1324	824	648	813	874	786	1014	399	2266	617	1096	597	1493	1452	784	1394	815	1087	1068	1070	957	1091	1108	784
59	1582	782	1121	1449	903	1314	1437	1355	828	714	888	939	1024	344	2016	540	940	539	1717	891	1453	1224	1012	1123	1456	1129	882	658	842	1023	716	1094	378	2181	408	1184	631	1456	1047	605	1477	1101	926	1165	979	831	1101	1008	774
60	2058	776	1359	1388	955	1414	1518	1200	747	715	916	983	1041	348	1983	455	943	493	1728	997	1469	1332	1025	1221	1463	1384	874	578	712	908	923	1050	431	1960	520	1005	575	1402	1153	764	1424	1155	801	1000	1067	764	1037	1145	822
61	1798	968	1275	1394	903	1268	1400	1253	743	587	752	1031	1023	512	1983	458	956	762	2009	869	1596	1530	1059	1201	1362	1301	783	634	690	843	903	1246	453	2127	398	1083	616	1569	1172	836	1372	1220	866	980	1138	951	1155	1085	696
62	1689	834	1231	1427	935	1087	1462	1175	626	596	798	906	944	367	2043	467	947	489	1720	914	1449	1218	933	1232	1333	1155	685	621	774	772	778	1089	520	2206	517	1242	554	1612	1064	769	1380	1095	897	878	1113	824	1197	1064	651
63	1898	793	1312	1259	788	1362	1616	1280	718	648	867	931	1107	428	1965	558	1019	608	1693	968	1405	1093	1004	1043	1439	1204	930	695	905	898	756	970	395	2108	583	1013	524	1761	1522	748	1447	959	890	1073	1148	806	1243	1144	752
64	1871	891	1332	1347	827	1306	1642	1224	757	593	880	919	994	339	1999	510	989	454	1774	964	1538	1233	989	952	1409	1242	862	652	666	826	662	1174	463	1991	520	1096	636	1759	1394	1025	1290	985	918	1049	1110	892	1198	1108	762
65	1759	821	1332	1340	916	1307	1357	1120	775	671	772	935	853	377	2086	435	1126	573	2089	879	1463	1240	911	1203	1369	1421	741	662	656	834	829	1083	587	2225	513	904	565	1616	1325	785	1447	1040	925	1191	984	903	1032	975	875
66	1622	845	1255	1287	755	1143	1551	1275	959	552	610	929	1033	270	1958	510	971	496	2147	1183	1321	1340	1003	1087	1331	1286	696	546	703	862	835	1145	561	1943	452	1120	592	1558	1352	713	1655	960	824	1047	1229	783	1003	988	822
67	1783	886	1391	1364	705	1238	1397	1126	726	564	737	809	1016	436	1954	414	1043	564	1719	905	1474	1364	994	1071	1506	1367	857	699	810	987	871	1063	358	2120	421	1072	555	1568	1044	816	1574	928	878	963	1187	746	1105	1110	790
68	1691	930	1415	1280	879	1212	1526	1054	674	601	860	830	1004	352	1907	690	958	597	2177	915	1424	1256	971	1233	1422	1495	878	747	661	914	736	1057	515	2193	382	1164	492	1803	1548	976	1391	1052	827	1082	1047	788	963	1012	506
69	1761	902	1269	1450	852	1206	1671	1079	1053	624	819	900	1126	358	1976	513	918	618	1708	988	1562	1206	1180	1017	1469	989	772	745	722	893	769	1142	496	2241	508	1098	557	1758	1547	819	1320	1055	826	1194	1033	799	939	1028	664
70	1732	983	1333	1287	788	1302	1439	1235	852	637	683	1000	1046	346	2078	406	1075	448	1824	948	1511	1360	866	1012	1395	1085	878	718	800	958	877	969	540	2081	299	1161	521	1589	1443	842	1393	992	871	914	1218	780	1044	989	678
71	1824	793	1254	1423	964	1164	1541	1098	678	592	917	950	983	291	2170	490	861	545	2139	891	1413	1338	991	1086	1399	1012	846	653	752	801	796	1151	419	2134	526	1197	501	1589	1441	743	1647	986	710	1125	1105	950	1136	1009	720
72	1774	868	1259	1526	893	1270	1654	1138	833	616	884	863	1122	436	1875	428	1025	672	1781	856	1544	1370	927	1215	1429	1101	712	601	765	895	790	1071	414	2054	504	1142	525	1517	1397	710	1415	1056	938	973	1188	824	1002	978	815
73	1957	830	1253	1467	837	1253	1490	1141	814	532	927	937	1008	310	1997	470	1151	588	2279	949	1529	1438	967	1242	1471	1280	790	676	764	912	875	1302	314	2157	318	1372	414	1682	1130	763	1433	1058	869	1138	1191	857	1053	1100	824
74	1487	829	1237	1362	589	1381	1497	1138	777	506	770	992	1034	429	1836	417	550	614	2071	896	1587	1520	871	1098	1399	1127	866	650	768	819	749	1107	593	2149	319	979	662	1632	1244	833	1313	949	846	978	1150	703	1113	944	936
75	1793	791	1144	1420	867	1268	1611	966	901	638	787	1011	1076	417	1874	381	963	623	2155	777	1441	1454	1095	1251	1473	1081	686	687	913	765	947	1036	507	2113	420	1081	484	1639	1419	602	1403	948	887	1026	1128	743	1185	1014	790
76	1737	987	1271	1558	769	1256	1544	1335	793	723	747	987	1084	274	2123	466	1066	567	1767	767	1647	1313	902	1123	1493	1110	849	588	734	1021	777	988	390	2033	474	1117	635	1747	1187	1012	1322	977	832	1025	1120	855	1164	1125	683
77	1669	922	1305	1248	786	1323	1484	1244	785	668	700	816	1020	518	2058	370	913	611	1888	776	1495	1472	1001	1222	1433	1197	720	699	756	990	807	1091	518	2164	335	1233	402	1479	1436	641	1322	1099	871	986	1212	781	1194	1143	881
78	1861	1049	1401	1295	759	1393	1577	1096	882	674	830	769	1003	354	2104	399	1112	733	1719	807	1413	1486	1036	1194	1422	1151	857	641	712	638	736	1007	526	2111	289	1193	491	1551	1295	711	1477	1084	796	929	1243	594	799	1110	625
79	1758	855	1325	1363	919	1278	1457	1234	668	635	1004	956	1016	446	1992	422	979	675	1815	844	1500	1362	961	1101	1358	1261	843	741	748	1035	794	1028	514	2090	298	1054	545	1630	1129	1139	1639	1010	900	997	1232	788	1209	908	894
80	1780	708	1289	1313	819	1361	1476	1159	869	636	544	789	1195	312	2048	425	1125	511	1778	922	1547	1380	995	1190	1491	1091	848	659	721	808	880	1248	440	2198	293	1046	586	1789	1158	841	1531	988	816	1079	1151	800	1016	895	701
81	1601	816	1224	1517	845	1296	1559	1195	816	745	829	921	1058	393	1897	376	1007	494	1810	804	1627	1335	918	1109	1455	1345	897	809	825	1006	783	1105	455	2071	370	1271	567	1537	1145	656	1378	1055	803	1071	992	750	1030	1100	761
82	1680	843	1209	1315	917	1474	1409	1477	688	546	799	923	1028	353	2151	366	1070	593	1672	883	1623	1318	971	1092	1561	1217	861	740	848	890	898	1185	616	2052	382	1285	666	1530	1271	708	1247	1061	837	920	1071	869	1212	886	870
83	1704	759	1146	1385	898	1345	1496	1143	797	475	888	1036	1078	354	1952	420	1126	681	1818	911	1494	1380	988	1048	1447	1098	807	720	835	994	824	1161	490	2147	236	1223	651	1686	1673	967	1510	971	840	984	1114	734	1060	921	767
84	1589	921	1146	1511	947	1403	1549	1320	775	830	830	755	1044	326	2018	389	1114	462	1886	1038	1459	1429	921	1061	1506	1119	751	708	726	757	812	1220	355	1955	349	1198	525	1845	1456	670	1509	850	1031	972	1123	840	1108	1076	832
85	1843	966	1156	1422	845	1410	1539	1033	724	546	776	921	1046	349	1957	430	575	360	1869	890	1508	1273	917	1054	1449	1236	876	701	780	947	874	1074	466	2159	329	1142	561	1737	1256	916	1386	1019	1080	1018	1288	617	1150	1120	807
86	1781	984	1238	1468	1068	1391	1408	1093	785	851	823	951	999	300	1822	439	1031	564	1872	805	1547	1365	989	1181	1428	1218	734	741	805	770	787	1071	594	2045	364	1024	538	1661	1089	1130	1541	883	890	1069	1255	776	1247	1090	669
87	2045	1089	1182	1435	914	1225	1512	1066	824	556	843	1038	909	536	1866	360	1006	652	2122	882	1382	1342	1001	1077	1497	1037	801	902	539	764	732	1036	451	2145	339	1192	497	1544	1063	895	1379	839	855	1010	1082	767	1103	983	706
88	1878	819	1162	1487	910	1234	1421	1127	711	485	958	978	979	390	1911	440	1033	508	1879	847	1637	1224	1025	1227	1514	1310	812	539	775	925	870	1207	469	2053	295	1250	510	1594	1148	1037	1564	882	935	1109	1007	685	1149	995	759
89	1786	874	1158	1360	907	1184	1560	1070	808	622	864	844	1109	323	1980	438	1089	523	1880	897	1860	1363	901	1090	1494	1202	943	668	701	779	795	1262	591	2094	379	1216	615	1792	1273	763	1536	993	930	1011	1164	903	1081	1038	785
90	1625	774	1153	1358	762	1363	1529	1149	747	685	739	902	1038	324	1900	464	1006	533	1882	947	1410	1325	1009	1160	1603	1138	756	629	833	1001	871	1113	397	2133	474	1141	677	1488	1468	872	1497	953	870	1252	1178	820	1090	1148	639
91	1852	831	1105	1267	912	1315	1378	1027	852	622	808	964	1028	348	2072	328	1035	480	1807	1040	1513	1335	852	1065	1470	1317	886	697	730	908	905	1161	488	2032	441	1009	639	1650	1273	1091	1447	1018	765	1016	1177	778	1119	1126	773
92	2017	883	1211	1325	762	1455	1597	1344	786	596	886	859	1177	444	1910	450	1050	456	1838	943	1625	1390	922	1119	1470	1150	821	711	645	948	987	931	546	1947	465	1126	546	1684	1196	1127	1290	976	767	1219	1168	718	1125	943	763
93	1671	1070	1259	1349	986	1366	1436	1194	756	712	898	891	989	501	1963	289	964	454	1898	825	1757	1325	813	1261	1386	1227	789	634	718	844	904	1110	431	2174	382	1116	633	1565	1485	921	1580	1122	808	1117	1167	760	979	975	814
94	1662	825	1177	1456	907	1366	1422	939	733	490	919	975	1149	341	2075	272	1023	793	2105	947	1383	1308	1011	1107	1313	1068	832	727	765	896	926	1265	502	2101	396	1153	532	1514	1103	1159	1708	1114	923	1205	1008	785	1146	1071	789
95	1703	843	1285	1210	790	1219	1639	1126	714	738	712	843	1180	340	1942	327	913	857	1940	987	1792	1364	825	1301	1508	1059	870	653	669	677	783	1067	523	2102	444	1217	750	1731	1507	932	1679	983	945	1201	1202	736	1201	953	687
96	1791	895	1174	1457	978	1243	1591	1119	713	572	843	588	1178	339	1753	324	984	424	2086	1019	1468	1316	865	1262	1352	1387	947	626	754	785	802	950	532	2256	502	1171	751	1522	1319	979	1314	1037	854	945	955	919	1308	1059	728
97	1661	802	1322	1311	886	1188	1490	1268	862	675	809	842	1180	207	1937	354	1256	461	2410	893	1513	1309	958	1116	1413	1249	728	762	773	832	770	1221	513	2116	497	1162	678	1601	1226	971	1231	1101	742	1149	1266	702	1135	1060	789
98	1738	1023	1151	1515	815	1248	1328	1260	841	633	933	976	1140	364	1861	470	934	710	2069	970	1306	1382	932	1319	1360	1001	908	710	844	917	950	1140	586	2098	522	1206	559	1747	1511	1108	1564	873	853	1201	1229	797	1198	1188	721
99	1928	947	1102	1511	870	1331	1392	1123	782	632	832	947	1065	364	1900	540	1135	489	2109	859	1428	1312	996	1241	1397	1252	806	709	743	778	876	1143	590	2277	457	1053	447	1668	1023	882	1381	1266	830	1088	1086	780	1048	1071	693
100	1695	913	1244	1387	908	1484	1372	1464	801	493	867	838	1060	397	1849	384	1009	542	1951	916	1625	1346	872	1108	1590	1275	1004	636	778	823	790	1139	429	2066	311	1165	575	1724	1005	1107	1503	782	940	1173	1326	809	1195	1020	813
101	1640	1086	1186	1292	774	1293	1474	1216	875	545	721	1036	1170	309	1881	251	969	611	2142	1007	1369	1318	925	1047	1467	1268	1033	635	806	895	854	1069	360	2028	483	1200	605	1746	1035	877	1332	901	835	1089	1098	747	1040	1062	936
102	1726	702	1173	1158	827	1295	1452	1203	683	751	647	802	1191	332	1766	248	1147	633	1890	872	1601	1270	999	1087	1504	1204	880	616	717	906	703	1180	399	2008	387	1304	466	1636	1572	1029	1371	1120	957	1245	1134	870	1210	1111	830
103	1689	725	1130	1466	849	1322	1613	1185	799	740	633	1022	1170	377	1831	354	1031	555	1991	856	1485	1436	971	1114	1336	1386	877	654	657	826	919	1077	461	2185	393	1027	793	1572	1051	994	1326	973	768	1039	1092	843	1084	1033	699
104	1711	845	1071	1367	775	1390	1475	1161	781	644	889	747	1141	337	1842	518	1032	552	2225	930	1464	1506	959	1213	1394	1061	725	535	609	816	903	1189	509	2143	454	1219	631	1678	1186	1005	1232	1042	940	1062	1214	731	1099	1024	772
105	1715	909	1205	1171	740	1329	1399	1174	828	451	804	931	1098	350	1984	367	1049	478	2092	927	1380	1342	920	1137	1473	1145	797	593	610	832	891	1135	467	2159	457	1177	575	1664	1163	1065	1390	1166	813	1001	1299	784	952	1066	819
106	1716	854	1266	1294	900	1335	1494	1203	793	688	814	859	1113	272	1898	405	1071	517	2158	997	1532	1344	1015	1131	1460	1224	894	928	604	788	744	1114	447	2158	318	1054	625	1612	1246	995	1327	1064	903	1022	1187	827	1269	1077	855
107	1822	780	1223	1287	666	1392	1402	1048	757	917	811	961	931	281	1811	395	1120	474	1913	943	1365	1372	819	1023	1370	1273	1008	619	846	666	803	1282	519	2249	449	1134	636	1482	1511	1026	1455	958	914	964	1286	806	994	1072	725
108	1890	835	1164	1554	846	1377	1480	1319	706	925	1059	772	1117	343	2026	350	948	404	1954	964	1551	1304	921	1001	1536	1093	812	732	693	674	920	1176	450	2079	412	1030	744	1528	1599	1046	1329	1161	868	1064	1196	773	1158	973	720
109	1715	874	1209	1089	841	1236	1418	1258	972	923	1008	915	1002	339	1876	507	1119	390	1945	1024	1448	1441	923	1250	1321	1173	764	608	574	795	803	1163	319	2318	472	965	667	1749	1988	1150	1403	951	971	954	1310	822	1221	1033	704
110	1881	952	1228	1134	745	1300	1486	1179	1053	737	1194	899	1130	304	1771	771	1025	439	1892	973	1277	1233	894	1097	1367	1362	783	775	772	785	871	1092	409	2249	380	1172	650	1802	2638	1338	1320	1111	899	1165	1243	685	1154	1091	822
111	1823	713	1206	1475	775	1227	1484	1376	1487	625	1055	745	1055	380	1914	687	980	666	1967	872	1633	1263	879	1052	1299	1232	910	517	829	983	1025	1026	522	2147	451	1170	612	2109	2897	1555	1568	1021	876	1056	1344	803	1334	1094	696
112	1885	873	1138	1563	824	1361	1705	1567	1728	766	1618	925	979	380	1825	831	905	605	2404	907	1463	1370	776	1153	1383	1056	993	525	951	945	899	1113	470	2254	457	1109	663	2233	3056	2068	1597	1071	1075	1170	1168	805	1079	1034	725
113	2029	898	1358	1462	919	1187	1981	1738	1872	624	1601	841	1099	411	1785	1212	1170	629	2241	971	1422	1366	1015	1006	1359	1509	936	734	1144	808	931	1241	408	2112	472	1121	681	2495	2828	2224	1693	1409	1003	1376	1364	854	1205	1125	772
114	1938	999	1361	1468	802	1185	2011	1763	2096	687	2006	1019	1022	344	1844	1177	1053	631	1954	1051	1294	1320	922	1151	1385	1593	1038	714	1301	744	833	1135	544	2165	471	1129	648	2491	3074	2496	2300	1583	1248	1487	1574	562	1370	1279	633
115	1924	786	1832	1336	826	1339	2073	1783	1905	945	2115	1038	1347	330	1737	1064	1229	746	1825	922	1390	1343	1086	1027	1391	1808	950	794	1594	789	765	1051	394	2253	481	1176	792	2481	3015	2607	2428	1464	1130	1503	1783	779	1586	1584	701
116	1743	1104	2328	1611	820	1320	2214	1767	1831	799	2085	1172	1071	391	1888	1038	1334	1005	1878	965	1514	1412	978	1090	1419	1843	1065	768	1655	748	700	903	429	2243	543	879	660	2667	2792	2519	2346	2005	1403	1717	2219	800	1959	1754	719
117	1945	1366	2641	1679	1036	1242	2385	1805	2033	894	2078	1334	1710	335	1814	1091	1293	1235	1836	1146	1795	1713	1012	1083	1394	1820	1211	733	1586	992	880	1032	380	2086	634	1206	473	2482	2919	2477	2281	2062	1527	1484	2460	1121	2319	1751	915
118	2031	1399	2642	1700	1127	1287	2574	1708	2009	1026	2030	1465	1926	444	1828	1058	1438	1106	1894	1603	1858	2208	1077	1108	1352	1914	1224	800	1701	670	829	1158	372	2247	727	1279	722	2628	2889	2753	2512	2219	1588	1513	2791	1202	2401	1869	1249
119	1796	1399	2658	2211	1037	1324	2414	1736	1854	1059	1902	1326	1620	554	1879	1011	1201	1062	1978	1538	2244	2205	1014	988	1452	1840	1290	827	1596	907	714	1198	412	2330	815	1293	589	2545	2845	2664	2436	2017	1651	1326	3162	1181	2518	1825	1497
120	2024	1587	2618	2370	929	1453	2377	1821	1994	1446	1857	1284	1745	520	1913	1050	1699	994	2372	1431	2851	2392	937	1135	1361	1732	1267	804	1642	1079	804	1066	526	2292	1091	1325	693	2654	2940	2629	2624	1822	1662	1646	2991	1158	2162	2010	1472
121	1754	1918	2782	2541	984	1299	2332	2004	1917	1005	1901	988	1532	841	1935	1122	1583	1037	2395	1550	2961	2325	1097	1070	1399	1438	1229	1160	1531	1150	901	1140	517	2329	932	1058	800	2565	3054	2600	2434	1763	1712	1548	3202	1189	2548	1822	1690
122	2113	1769	2624	2339	1022	1256	2317	1829	1974	1075	1845	1279	1705	796	2069	1017	1661	1177	2353	1704	2852	2455	1054	1134	1291	1659	1392	950	1433	1489	986	1057	435	2301	1108	1129	893	2609	3057	2496	2527	2071	1675	1500	3217	1237	2476	1929	1906
123	1931	1607	2592	2431	924	1280	2264	1940	2111	1069	1941	1276	1482	699	2007	1048	1555	1117	2294	1678	2714	2271	1089	1134	1451	1754	1032	1068	1700	1078	1254	1234	434	2341	1117	1524	780	2602	2936	2784	2267	1674	1731	1550	3177	1189	2377	1926	1918
124	2243	1668	2588	2419	981	1368	2463	1704	2081	1213	2153	1399	1722	932	1896	951	1435	863	1915	1649	2805	2400	966	1018	1328	2029	1195	1099	1587	1134	1337	1137	330	2523	1177	1412	846	2590	3085	2547	2237	1739	1806	1659	3272	1363	2422	1946	1881
125	1688	1915	2567	2256	1117	1381	2271	1760	1884	1167	2010	1241	1570	842	1992	1085	1422	873	2035	1766	2750	2304	850	1222	1481	1631	1115	1000	1618	1202	1327	1211	502	2414	1131	1593	850	2592	2984	2574	2171	1680	1780	1434	3084	1345	2499	1953	1841
126	2082	1702	2735	2267	1011	1260	2273	1678	1919	1155	1788	1228	1439	742	1939	1272	1529	833	2320	1711	2781	2307	1031	1125	1415	1388	1028	1099	1732	1038	1304	1191	619	2300	1091	1445	824	2589	3167	2694	2302	2337	1787	1508	3119	1270	2342	2136	1955
127	2119	1838	2848	2170	1004	1410	2476	1974	2131	1154	1989	1166	1609	718	2037	961	1599	787	1855	1812	2706	2169	1109	1150	1540	1724	1040	1200	1705	1322	1224	1237	586	2549	1022	1417	848	2561	3017	2781	2426	2436	1666	1533	3226	1264	2126	1947	1799
128	2058	1745	2871	2462	1137	1262	2351	1713	1939	987	1899	1129	1723	1016	1942	1024	1490	764	1784	1697	2523	2144	1158	1286	1567	1802	1021	1033	1747	1274	1244	1312	604	2322	884	1375	728	2346	2893	2631	2316	1766	1838	1522	3225	1233	2448	2034	1835
129	1950	1919	2725	2209	1005	1472	2425	1911	1920	1260	1862	1208	1535	1020	2089	1129	1562	883	2158	1848	2640	2298	1062	1123	1420	1745	1092	1151	1688	1074	1295	1372	593	2570	870	1481	778	2773	3120	2571	2397	2106	1867	1549	3278	1224	2040	2152	1869
130	1867	1828	2794	2244	1049	1330	2405	1905	1758	1180	1755	1268	1541	802	2123	1137	1383	784	2033	1906	2410	2402	1154	1011	1388	1786	1092	1144	1678	1282	1136	1234	579	2648	938	1634	555	2520	2962	2367	2315	2050	1944	1679	3417	1399	2030	2118	1609
131	1673	1601	2788	2072	1011	1379	2464	2103	1604	1121	1691	1117	1481	840	1840	951	1651	650	1620	1655	2400	2457	890	1152	1245	1853	1110	1306	1509	1338	1084	1182	502	2632	975	1155	808	2605	2858	2677	2223	2157	2002	1532	3155	1188	2206	1940	1909
132	1808	1910	2846	1973	978	1228	2353	1756	1833	1129	1648	1228	1284	808	2065	1065	1507	849	2108	1745	2638	2505	973	1189	1302	2271	1080	1111	1330	1203	1139	1337	651	2565	838	1363	845	2639	3154	2505	2301	2046	1705	1588	3231	1197	2365	1876	1811
133	1664	1706	2830	1934	994	1415	2357	1837	1978	1055	1832	1038	1416	822	1961	1322	1553	652	1642	1847	2365	2541	1063	1083	1485	1895	991	1335	1377	1392	1242	1234	595	2746	914	1439	950	2577	3149	2386	2590	2037	1905	1630	3204	1127	1803	1870	1807
134	1911	1860	2689	2059	1146	1460	2479	1757	1985	1230	1888	1168	1464	783	2121	1263	1506	693	1776	1488	2562	2184	1074	1109	1472	1835	1129	1106	1348	1358	1138	1211	629	2648	834	1355	876	2478	2888	2284	2126	2056	1854	1464	3172	1620	1303	1980	1806
135	1699	1865	2921	1944	1129	1207	2386	1800	1913	1229	1650	1004	1470	758	2057	1290	1552	462	1471	1721	2528	2433	958	1175	1487	1629	1042	998	1435	1269	1185	1184	910	2660	849	1206	890	2460	2872	2478	2098	2103	1684	1455	3225	1392	1093	1898	1508
136	1721	2010	2822	1957	1009	1496	2221	1705	1814	1208	1520	979	1275	680	1917	1128	1488	396	2040	1631	2587	2362	923	1297	1396	1701	1010	1389	1522	1306	1216	1207	823	2673	800	1276	818	2400	3124	2360	2174	2149	1710	1581	2959	1281	1391	1873	1851
137	1903	1809	2644	2018	1033	1574	2484	2041	1929	1308	1735	915	1257	781	2160	1283	1602	806	2106	1669	2275	2234	1004	1184	1458	1719	848	1066	1601	1375	1129	1269	991	2841	773	1261	885	2581	2816	2200	2154	2165	1669	1541	2930	1445	1329	1757	1642
138	2004	1744	2656	2003	1021	1323	2294	1960	1968	1005	1709	1125	1414	904	1834	1154	1493	720	1633	1603	2490	2226	1052	1320	1395	1707	975	1184	1400	1232	1239	1231	837	2882	807	1441	723	2418	2811	2297	2235	1708	1609	1403	2882	1353	1335	1886	1821
139	2065	1851	2482	2110	859	1378	2448	1877	1981	1199	1591	1072	1301	765	2101	1237	1455	805	2140	1544	2454	2264	927	1295	1303	1521	991	1026	1316	1111	1077	1268	607	2842	962	1376	896	2331	2834	2402	2136	2209	1674	1587	2889	1096	1315	1683	1693
140	1967	1633	2697	1880	1003	1403	2418	1979	1890	1296	1671	1040	1413	785	2080	1388	1509	747	1533	1522	2376	2357	992	1040	1367	1690	1078	926	1340	1235	1174	1027	734	2704	946	1352	612	2454	2904	2360	2159	2185	1699	1712	3010	1311	1150	1820	1479
141	1915	1693	2554	1812	937	1279	2216	1769	1949	1238	1721	1198	1233	662	2254	1335	1366	778	1695	1580	2577	2102	1031	1133	1423	1455	933	1284	1338	1230	1144	1162	670	2816	1094	1312	729	2437	2509	2627	2174	2143	1738	1414	2911	1482	1378	1782	1391
142	1991	1819	2810	1996	1052	1175	2336	1706	1940	1176	1717	1206	1286	684	2139	1482	1365	542	1660	1494	2455	2235	991	1240	1440	2048	929	1083	1433	1193	960	784	740	2710	979	1161	721	2374	2962	2460	2467	1795	1550	1654	3087	1150	1298	1694	1698
143	1718	1459	2450	1774	1120	1302	2286	1726	2008	1113	1645	1214	1068	576	2277	1443	1437	680	1613	1493	2157	2100	993	1196	1382	1865	871	1015	1094	1277	952	1116	785	2920	1009	1258	714	2387	2810	2505	2078	2187	1749	1446	2943	1136	1025	1925	1522
144	1646	1795	2380	1682	933	1416	2408	2090	1783	1187	1580	1019	1047	602	2128	1209	1410	519	1495	1459	2388	2015	1031	1378	1560	1716	930	1248	1550	1116	1043	1318	581	2572	881	1256	790	2396	2661	2630	2459	2049	1720	1630	2954	917	1349	1997	1394
145	1561	1573	2529	1972	941	1246	2417	1797	1837	1140	1638	1034	1237	535	2111	1177	1353	627	1957	1420	2133	2121	914	1396	1571	1793	995	1041	1164	1248	1164	1188	677	2647	1060	1271	791	2366	2621	2500	2105	2040	1680	1514	2995	1136	1267	1964	1528
146	1849	1630	2492	1824	879	1457	2413	1742	1947	1075	1642	1189	1263	683	2109	1461	1228	643	1703	1477	2252	2122	1043	1204	1414	1785	904	904	1198	1270	1122	1222	666	2412	852	1209	744	2260	2651	2312	1890	2111	1709	1430	3074	1135	1254	1949	1432
147	1561	1208	2469	1624	980	1263	2499	1950	2066	1106	1652	1147	951	609	2113	1277	1361	517	1638	1383	2162	1737	1098	1138	1461	1737	1047	924	1303	1304	909	1182	752	2664	965	1327	547	2470	2521	2353	2571	2056	1507	1405	2863	1274	1370	1790	1547
148	1616	1516	2565	1748	947	1246	2521	1650	1790	1177	1544	1167	1214	575	2108	1435	1409	547	1909	1395	2316	1851	970	1231	1368	1837	996	1121	1087	1312	905	1109	586	2622	889	1396	502	2223	2582	2320	2407	1962	1753	1510	2980	1163	2251	1743	1538
149	1689	1316	2357	1652	810	1274	2600	1902	1733	1404	1562	1025	1173	510	2002	1301	1444	545	1905	1370	2157	1884	1070	1222	1391	1818	913	891	1191	1336	902	1010	657	2690	886	1327	666	2529	2605	2246	2290	2159	1454	1444	2815	1145	2101	1871	1614
150	1514	1740	2359	1662	941	1497	2420	1996	1921	1047	1578	1145	1239	552	2203	1375	1306	530	1979	1299	2215	1903	952	1345	1259	1724	782	1078	1208	1246	862	1161	673	2525	804	1331	706	2553	2859	2461	2338	1912	1533	1520	2831	1039	1956	1996	1215
151	1778	1416	2187	1693	885	1303	2350	1854	2042	957	1655	1053	1272	611	2158	1332	1221	577	1938	1407	2128	1924	922	1238	1435	1650	931	878	1008	1012	947	1068	692	2707	992	1444	883	2358	2360	2100	2341	2133	1632	1329	2978	1196	2027	1914	1309
152	1794	1677	2339	1768	946	1413	2365	1710	1800	1068	1491	1013	1232	495	1995	1476	1199	476	1449	1359	2132	1985	1023	1245	1487	1775	1113	966	1148	1233	904	910	533	2439	1009	1344	834	2319	2397	2331	1988	2089	1442	1424	2906	1234	2391	2057	1516
153	1649	1223	2330	1842	975	1273	2531	1695	1780	1100	1587	1029	1206	546	2088	1339	1155	586	1953	1372	2045	1809	1092	1395	1401	1410	955	906	1084	1085	985	1194	587	2261	991	1176	661	2310	2352	2165	1794	1871	1462	1447	2952	1134	2248	1903	1388
154	1847	1576	2258	2038	943	1296	2402	1742	2019	1021	1395	1107	1172	473	2084	1477	1210	551	1895	1274	2058	1868	982	1423	1486	1814	991	987	1068	1061	947	1129	535	2427	922	1509	497	2385	2269	2155	2197	1750	1329	1357	2832	1099	2227	1847	1352
155	2061	1398	2136	2130	859	1515	2489	1795	1868	1071	1374	1110	1142	494	1986	1499	1266	508	1628	1205	2188	1694	924	1272	1381	1718	968	1050	1096	1198	881	1158	538	2510	903	1317	739	2248	2238	2355	2297	2012	1521	1465	3049	1251	2332	1955	1181
156	1632	1513	2186	2115	869	1536	2345	1901	1751	967	1351	1044	1085	518	1989	1554	1174	436	1870	1241	1812	1805	1041	1319	1384	1644	954	879	1004	1122	791	971	502	2413	888	1205	702	2200	2439	2152	2303	1527	1282	1412	3144	1083	2084	1649	1225
157	1902	1532	2239	2191	998	1327	2135	1813	1718	948	1315	1058	959	511	2094	1670	1296	732	1672	1393	1864	1744	970	1330	1663	1601	645	1075	980	1135	929	1409	571	2554	1013	1198	384	2373	2308	1895	2142	1507	1347	1615	3012	1155	1597	1683	1454
158	1607	1420	2366	2185	1033	1352	2274	1611	1935	888	1391	990	1056	612	2095	1584	1260	474	1591	1157	1898	1558	975	1367	1354	1607	678	883	1166	1204	917	1183	512	2429	754	1220	684	2200	2336	1914	2141	1632	1387	1512	2506	943	1945	1719	1209
159	1812	1164	2191	2119	984	1467	2271	1933	1601	1006	1363	1056	1223	598	2041	1673	1239	487	1994	1313	2028	1903	1073	1339	1375	1726	1049	899	1072	1017	852	1158	500	2144	680	1188	540	2146	2232	2062	2205	1925	1383	1384	2978	1112	1723	1841	1229
160	1501	1110	2150	2030	763	1239	2201	1792	1385	1128	1457	922	1049	547	1913	1442	1245	556	1582	1319	1934	1988	1007	1158	1415	1534	850	905	997	1066	947	933	520	2238	782	1267	408	2277	2133	1725	2132	1970	1435	1373	2900	1262	1692	1799	1284
161	1837	1364	2286	2303	863	1410	2050	1854	1638	995	1357	989	1000	451	1966	1372	1048	571	1986	1219	1858	1936	883	1312	1445	1480	776	906	1033	991	936	1178	490	2440	777	1307	811	2186	2416	1612	2196	2003	1375	1422	2809	1212	2097	1765	1213
162	1733	1318	2105	2243	787	1640	2398	1835	1651	830	1049	876	1098	535	2102	1251	1184	685	1616	1174	1806	2239	975	1275	1490	1611	985	886	1041	1242	910	1114	513	2347	720	1253	812	2204	2366	1859	2129	1882	1460	1458	2871	1067	1820	1948	1168
163	1467	1003	2190	2182	768	1279	2036	1715	1629	1034	1108	976	1154	499	2109	1160	1309	435	1958	1177	1731	1978	903	1359	1536	1428	777	776	925	976	839	1245	523	2394	1203	1325	558	2338	2461	1639	2085	1981	1343	1433	2817	1040	1698	1593	1299
164	1593	1017	2121	2086	938	1165	2299	1897	1540	937	1337	955	1143	506	2048	1262	1195	600	1999	1136	1917	2060	1044	1172	1521	1497	776	927	1035	1138	910	877	403	2372	1339	1271	641	1986	2075	1854	2177	2201	1219	1551	2570	1099	1869	1787	1332
165	1579	948	2125	2211	776	1580	2030	1821	1481	898	955	1013	1034	464	2102	1249	1346	370	1800	1281	1993	1970	986	1289	1505	1490	933	757	993	1221	759	1046	430	2241	1430	1227	483	2109	2543	1637	1977	1887	1360	1365	2739	1021	1661	1538	1149
166	1760	1105	2016	2333	874	1574	2118	1828	1429	848	1164	1086	947	426	1916	1034	1204	597	1873	1024	1692	1828	877	1272	1268	1363	1007	804	958	904	882	1433	409	2337	1292	1151	693	2259	2657	1816	1899	1972	1285	1385	2602	1003	2054	1773	1311
167	1654	1008	1960	2142	847	1552	2119	1670	1420	977	1070	1054	919	478	1988	1112	1262	395	1656	1003	1817	1942	913	1131	1492	1441	1083	1045	897	1042	819	1155	597	2212	1124	1320	623	2238	2723	1721	2039	2012	1277	1357	2664	1111	1542	1896	1163
168	1897	980	1933	2216	941	1574	2061	1775	1363	875	1042	1040	1093	302	1972	1223	1322	471	1603	1107	1816	1994	1041	1360	1350	1306	1026	802	838	868	714	1259	451	2241	1461	1166	457	2133	1988	1547	1937	1952	1432	1402	2644	1126	1933	1715	970
169	1528	1029	1978	2168	911	1399	2192	1728	1397	1008	994	1014	1065	456	2125	1175	1126	402	1477	1087	1626	1910	924	1208	1357	1517	757	834	906	995	1021	1161	572	2251	1531	1492	776	1979	2067	1488	1685	1649	1442	1422	2585	999	1514	1706	998
170	1740	1042	1807	2162	950	1436	2084	2069	1444	1048	1029	876	963	430	2115	1231	1141	553	1968	886	1768	1763	801	1409	1320	1496	720	853	969	1125	878	1157	523	2113	1428	1281	693	1945	2068	1450	1778	1500	1270	1421	2573	1069	1652	1757	1011
171	1801	1201	1925	1971	804	1613	1912	1707	1317	967	997	905	1118	445	2077	1239	1177	420	1553	1068	1683	1891	1005	1127	1442	1362	761	874	889	1061	857	1217	528	2326	1412	1189	812	2006	2229	1384	1779	1680	1287	1480	2571	888	1490	1527	1062
172	1756	947	1866	1942	806	1325	1874	1778	1256	1009	1153	945	855	557	1900	1155	1235	418	1652	1102	1572	1696	875	1257	1470	1466	1018	775	927	982	784	1146	367	2343	1479	1249	770	1980	2037	1376	1796	1806	1259	1254	2378	1029	1796	1736	1130
173	1804	1317	2002	2131	790	1629	1850	1789	1458	996	1021	840	952	439	2194	1318	1139	628	1515	1165	1726	1755	885	1222	1540	1393	834	684	762	813	809	1139	359	2202	1160	1209	889	1988	1957	1366	1674	1703	1335	1298	2374	1104	1438	1400	1106
174	1951	815	1829	1999	845	1674	1761	1966	1268	927	1066	1149	940	473	2089	1308	1129	396	1458	1113	1803	1784	1046	1328	1653	1219	917	798	851	862	940	1049	423	2057	1451	1323	564	1723	2192	1442	1760	1858	1115	1490	2440	1003	1473	1676	1169
175	1905	1039	1807	2108	677	1272	1855	1701	1468	971	1074	955	902	604	2156	1358	1203	513	1614	1213	1699	1672	996	1144	1442	1361	908	769	883	1011	854	944	492	2175	1314	1258	501	1944	2219	1391	1846	1584	1385	1382	2403	991	1554	1536	870
176	1919	1269	1745	2100	922	1558	1970	1955	1436	812	1027	953	919	462	2063	1268	1085	424	1677	960	1537	1590	1060	1329	1525	1316	945	711	916	1061	848	1079	416	2179	1306	1112	507	1743	2283	1268	1755	1610	1159	1506	2373	1059	1611	1621	1017
177	1567	917	1787	1885	923	1492	1776	1705	1273	917	967	1019	893	520	2105	1322	1192	454	1928	1065	1544	1539	785	1115	1255	1427	881	735	742	809	809	1023	446	2062	1204	1173	522	1955	2176	1211	1774	1388	1137	1356	2338	946	1635	1555	1030
178	1842	916	1832	2010	844	1273	1815	1580	1239	822	1077	1035	809	480	1922	1231	1063	491	1970	952	1635	1562	817	1108	1498	1386	803	798	824	871	830	1241	492	1957	1389	1409	788	1793	2040	1339	1599	1698	873	1315	2361	968	1549	1395	956
179	1775	1034	1735	1954	847	1389	1845	1679	1315	851	984	906	911	334	1986	1312	1186	488	1966	996	1727	1631	831	1270	1509	1259	793	838	737	956	770	1096	362	2268	1310	1188	626	1911	1849	1465	1814	1452	1286	1339	2364	1013	1558	1658	777
180	1945	855	1797	1917	809	1481	1619	1578	1224	800	981	1140	1006	537	2123	1111	1239	560	2062	1165	1562	1469	990	1236	1426	1296	855	843	766	932	844	1202	502	2108	1178	1237	492	1853	1682	1412	1710	1562	1023	1401	2059	947	1548	1626	911
181	1616	1066	1668	1700	803	1380	1754	1538	1296	863	1023	751	892	521	1994	976	954	765	2010	939	1542	1476	928	1149	1512	1316	826	776	917	881	865	1173	530	2355	1245	1283	560	1761	2159	1144	1758	1549	1224	1437	2138	958	1482	1420	1081
182	1920	977	1786	1775	653	1259	1689	1630	1082	729	896	937	893	325	1963	1190	1030	498	1820	910	1598	1637	830	1175	1288	1137	938	974	660	1018	767	1316	367	2096	1311	1325	771	1802	1742	1165	1609	1554	1241	1347	2157	1024	1138	1518	914
183	1478	1344	1767	1800	842	1286	1678	1495	1091	755	938	833	917	456	1904	1132	1074	403	1927	895	1457	1471	878	1153	1500	1187	808	850	798	998	836	1136	210	2103	1070	1141	470	1830	1903	1179	1566	1645	1030	1370	1983	875	1491	1625	888
184	1874	1028	1542	1778	849	1293	1729	1527	1092	721	1052	890	860	338	1938	1071	1235	498	1881	1063	1570	1652	817	1139	1452	1431	904	822	696	999	859	1104	382	2234	1165	1225	622	1970	1645	1090	1607	1451	1147	1283	2065	778	1442	1421	1037
185	1786	966	1664	1775	788	1475	1812	1519	991	1008	807	909	836	313	1886	1148	980	506	1551	1036	1527	1334	841	1176	1450	1300	615	720	601	848	852	993	416	2217	1108	1154	509	1818	1526	1115	1666	1506	1137	1106	2142	925	1395	1399	962
186	1892	968	1465	1713	855	1195	1661	1524	1250	834	860	791	973	349	2136	1217	1209	489	1453	862	1472	1492	1010	1242	1377	1556	706	883	755	915	795	1171	345	2200	1191	1177	683	1896	1655	967	1527	1352	1102	1096	2210	898	1294	1472	954
187	2053	925	1714	1801	857	1314	1529	1616	1157	771	907	1094	1019	543	2032	1064	1085	443	1675	995	1567	1494	910	1057	1466	1240	1036	919	650	1045	894	1183	440	2067	1080	1348	584	1725	1583	923	1798	1457	1151	1452	1852	931	1318	1490	978
188	1594	933	1693	1706	725	1229	1670	1364	1151	830	953	1065	903	399	2127	1180	1070	526	1674	1040	1484	1498	981	1238	1401	1455	737	926	623	937	771	1274	359	2164	1081	1200	603	1877	1538	990	1640	1502	1160	1171	2086	721	1245	1401	982
189	1650	1102	1656	1583	760	1608	1696	1784	943	681	931	884	913	370	1805	1118	1070	339	1998	1104	1604	1609	902	1160	1167	1378	767	590	698	952	885	1102	467	2046	1069	1249	597	1805	1654	1009	1573	1264	1127	1391	2069	835	1341	1450	1119
190	1895	830	1615	1587	796	1346	1645	1545	1051	732	1032	1023	969	388	1981	1149	1041	436	2013	887	1371	1535	941	1150	1395	1222	883	642	717	975	830	1179	495	1974	1078	1300	565	1662	1558	895	1832	1177	1129	1176	2226	859	1254	1445	930
191	1659	1051	1675	1693	903	1369	1474	1798	1022	731	961	834	881	459	1854	1088	1156	600	1826	985	1522	1422	907	1146	1369	1102	768	685	650	1003	941	1100	386	2008	1291	1385	532	2052	1587	1004	1680	1373	1050	1268	1931	796	1538	1341	672
192	1807	949	1635	1704	785	1300	1455	1631	1022	628	903	1023	941	409	1914	1239	568	573	1743	948	1528	1558	1067	1144	1442	1089	784	496	748	967	672	1196	441	2138	1156	1356	673	1696	1633	1131	1431	1277	1111	1174	1926	935	1262	1326	897
193	1520	1020	1370	1541	768	1333	1608	1388	894	745	952	1038	855	361	2031	1087	1129	637	1706	903	1590	1585	1000	1211	1374	1380	785	486	842	847	898	1189	424	2110	1023	1233	483	1826	1494	869	1511	1396	988	1252	1953	995	1480	1473	934
194	1825	1150	1375	1741	907	1425	1468	1534	930	784	867	942	1110	398	1953	1246	1149	547	1728	1054	1469	1567	895	1205	1388	1342	759	858	699	917	777	1171	336	2170	1033	1241	491	1843	1432	1086	1677	1327	1169	1377	1879	790	1630	1234	876
195	1835	1053	1527	1629	710	1575	1523	1230	962	812	1003	829	933	443	1890	1294	1144	379	1427	945	1432	1404	829	1161	1408	1108	682	815	664	858	831	1218	455	2217	915	1305	627	1882	1442	782	1674	1360	1151	1074	1838	796	1505	1226	839
196	1510	798	1535	1752	715	1448	1543	1676	1046	727	798	891	952	466	1921	1098	1189	445	1618	934	1551	1515	893	1095	1440	1210	1078	691	768	866	785	1063	280	1919	1057	1198	726	1905	1509	806	1368	1291	1221	1131	1747	836	1452	1270	803
197	1774	794	1495	1635	887	1670	1643	1557	1038	740	942	828	1028	390	1989	1126	1116	362	1584	1078	1601	1690	849	983	1379	1468	709	797	680	742	804	1228	412	2158	1032	1457	712	1767	1446	1004	1479	1232	1208	1282	1768	851	1295	1175	866
198	1730	1024	1487	1525	729	1331	1545	1576	889	613	843	955	962	303	2015	996	1047	496	1777	1084	1482	1406	776	1240	1384	1312	676	1022	731	855	768	1052	388	1930	1150	1227	590	1966	1472	904	1494	1242	1050	1084	1683	892	1119	1331	1049
199	1350	1127	1588	1401	828	1630	1475	1365	1004	609	756	987	841	393	1809	1167	1034	588	1665	880	1527	1499	737	1131	1415	1010	777	723	705	876	779	1060	440	2110	1137	1245	542	1711	1328	687	1435	1172	932	1030	1923	942	1099	1318	924
200	1434	704	1400	1483	968	1560	1353	1579	903	723	795	801	719	367	2004	1469	881	601	1589	1028	1466	1618	990	1018	1495	1422	828	739	888	797	800	1142	292	2106	1193	1426	644	1861	1411	884	1414	1147	946	1460	1812	864	1256	1326	739
201	1601	1145	1436	1494	798	1324	1556	1605	830	788	975	1059	831	431	1902	1277	1114	421	1959	988	1516	1490	983	1127	1407	1473	766	708	722	843	813	1150	385	2032	1130	1236	839	1835	1454	834	1459	1326	920	1489	1636	902	1290	1381	871
202	1734	1025	1447	1595	759	1388	1584	1665	841	884	882	896	994	368	1894	1317	1186	371	1973	931	1487	1617	932	1134	1455	1482	679	727	739	950	812	989	460	2050	1174	1326	679	1884	1462	742	1686	1233	923	1081	1778	824	1239	1335	830
203	1435	745	1381	1621	834	1273	1498	1167	1039	643	836	876	820	333	1882	1333	1042	608	1965	857	1496	1441	937	1111	1392	1270	838	754	806	793	890	1132	342	2047	1268	1387	673	2021	1379	775	1638	1256	1012	1430	1703	884	1252	1133	737
204	1725	711	1179	1320	743	1244	1622	1453	924	721	800	965	860	502	1867	1170	958	440	1882	837	1425	1454	910	1097	1607	1147	693	829	766	833	875	1140	565	2150	1086	1439	743	1796	1602	821	1390	1226	1174	1073	1710	732	1290	1262	824
205	1651	1097	1424	1528	950	1379	1346	1472	903	713	824	1066	832	450	1893	1231	1000	284	1950	846	1422	1474	880	1059	1434	1215	632	911	689	745	929	1028	349	2148	1307	1531	775	2123	1329	845	1437	1369	1068	1121	1602	969	1245	1302	849
206	1747	780	1549	1570	872	1544	1460	1604	867	611	849	942	704	469	1956	1150	962	512	1931	911	1395	1556	1084	1096	1514	1178	886	917	679	908	1018	1133	376	2118	1191	1266	574	1857	1458	892	1409	1235	956	1248	1780	884	1111	1059	814
207	1423	947	1533	1584	837	1145	1334	1328	911	653	778	1086	944	457	1817	1189	922	376	1870	816	1542	1379	831	1100	1511	1448	846	839	784	943	833	1065	446	1974	1137	1429	589	1833	1624	753	1486	1093	1041	1299	1732	880	1182	1272	841
208	1618	997	1452	1466	734	1397	1439	1413	787	841	834	980	1028	448	1886	1376	1002	392	1770	1005	1437	1216	866	1017	1349	1379	639	757	712	878	790	980	311	2143	1133	1371	743	1834	1287	866	1337	1281	938	1221	1731	936	1233	1191	812
209	1720	832	1368	1465	872	1545	1586	1429	702	629	750	904	933	423	2114	1350	990	662	1400	1134	1422	1384	852	1085	1363	1134	804	528	644	874	929	1121	420	2052	1121	1303	644	1924	1289	1110	1502	976	831	1310	1617	815	1348	1196	853
210	1427	920	1552	1436	698	1592	1477	1472	898	714	757	872	966	335	1954	1211	946	557	1753	887	1460	1417	786	1191	1379	1261	752	785	696	745	737	1144	268	2063	1067	1239	460	1691	1355	1079	1371	1306	1027	1151	1533	809	1075	994	808
211	1601	769	1312	1379	826	1523	1366	1330	834	837	778	794	1081	328	1952	1299	1024	457	1572	928	1456	1411	889	1261	1215	1210	748	806	704	904	829	993	437	2122	1076	1312	443	1871	1369	994	1466	1099	1090	976	1515	790	1293	1277	730
212	1543	801	1312	1453	788	1322	1475	1332	796	827	766	674	935	431	1939	1071	961	553	1890	977	1428	1404	939	1011	1539	1292	738	836	589	823	782	989	402	2118	610	1422	762	1764	1375	973	1397	1165	956	1118	1587	811	1080	1114	704
213	1766	1122	1274	1576	878	1274	1331	1315	865	833	687	949	907	502	1967	837	1169	401	1918	973	1311	1479	911	1070	1427	1177	698	746	617	881	715	1101	401	2137	565	1502	534	1894	1161	951	1360	1117	1091	1314	1424	747	1043	981	701
214	1617	821	1395	1397	815	1614	1450	1249	895	763	843	799	779	490	2053	870	1043	263	1605	1086	1425	1428	736	1152	1407	1021	712	570	830	920	885	897	400	1997	986	1203	504	2008	1373	1023	1472	1199	867	940	1494	831	1079	1229	832
215	1660	1040	1398	1499	807	1314	1506	1284	875	657	697	843	1023	481	1953	1013	1125	298	1758	845	1579	1367	916	1048	1193	1212	701	779	496	820	707	1005	384	2179	911	1072	765	1773	1261	1039	1564	1067	922	982	1482	776	955	1202	545
216	2028	971	1221	1293	848	1258	1310	1419	892	574	642	841	747	581	2073	964	1111	664	1675	1191	1601	1570	906	1103	1312	1234	836	901	674	918	802	1032	503	2119	878	1267	475	1972	1317	1068	1415	1084	933	1010	1445	732	1107	1134	879
217	1434	708	1338	1295	887	1359	1392	1358	748	728	896	860	719	562	2110	911	885	619	1880	1022	1805	1470	931	1071	1320	1192	914	769	673	823	810	988	462	2121	818	1204	518	1904	1287	1101	1429	1285	863	994	1390	815	1291	1128	831
218	1697	648	1442	1578	844	1197	1447	1239	911	648	867	906	784	497	1926	974	1018	577	1761	995	1508	1533	870	1014	1394	1087	684	820	734	844	989	1038	347	1961	830	1107	748	1671	1291	851	1462	1160	837	987	1303	787	1248	1240	1053
219	1956	852	1291	1475	878	1770	1513	1415	729	810	781	908	906	353	1962	817	1038	490	1604	845	1425	1336	893	1020	1548	1031	803	789	620	1018	703	968	393	1974	627	1151	537	1918	1338	844	1427	1163	844	928	1209	780	1373	995	667
220	1700	705	1300	1350	917	1317	1568	1205	747	740	865	846	689	347	2122	678	1087	637	1905	844	1380	1346	1019	1050	1369	1130	830	659	554	857	755	992	495	2174	759	847	446	1846	1425	1144	1467	961	914	1135	1308	780	1070	1156	930
221	1797	735	1264	1286	932	1604	1501	1399	808	906	750	858	751	378	2064	567	1069	539	1658	951	1537	1545	807	1258	1468	1142	736	696	612	885	928	912	461	2151	814	1325	731	1742	1259	1053	1418	1145	1010	1059	1223	863	960	1264	768
222	1732	855	1269	1465	759	1437	1322	1321	862	752	778	780	905	336	1968	710	1009	484	1784	939	1352	1413	869	1074	1339	1284	624	680	632	759	730	872	458	2263	917	1214	573	1607	1284	1010	1417	937	948	1208	1296	767	1304	1112	813
223	1882	694	1394	1352	940	1451	1481	1487	840	740	847	821	1020	357	2038	685	1049	549	1780	853	1370	1416	904	1165	1331	1056	604	677	748	745	876	936	376	1945	693	1077	554	1951	1236	834	1287	1097	853	972	1153	803	1133	1173	777
224	1804	1017	1318	1429	859	1353	1368	1471	673	868	733	992	1006	501	2193	708	1096	404	1746	942	1414	1406	921	1042	1184	1101	652	688	612	860	878	864	384	2166	886	1247	696	1898	1231	855	1343	999	910	1017	1342	703	1186	1044	770
225	1850	966	1185	1520	931	1249	1401	1406	949	595	810	805	759	489	2083	642	1008	445	1560	949	1701	1329	799	1129	1391	1092	733	619	583	955	874	820	434	2124	637	1071	588	1874	1371	940	1413	844	910	1010	1350	817	1219	981	832
226	1800	1204	1379	1555	689	1285	1429	1355	808	677	809	823	1023	498	2182	512	1103	619	1739	1000	1556	1434	858	1002	1285	1092	755	635	802	901	888	951	322	2318	790	1063	670	1784	1271	951	1399	1020	809	1045	1033	953	1184	1172	858
227	1918	955	1198	1501	833	1375	1419	1371	818	758	765	991	804	433	2222	561	1071	584	1797	773	1455	1374	771	1122	1498	1216	846	735	628	827	888	884	414	2117	762	1105	629	1976	1201	811	1323	938	891	983	1097	762	1163	1267	738
228	1857	969	1232	1506	818	1664	1396	1279	855	728	735	906	912	314	2477	505	1105	593	1641	882	1375	1483	948	1101	1382	1260	842	680	715	812	961	929	445	2162	596	1072	719	1841	1402	769	1431	1042	988	993	1142	863	1132	1062	829
229	1860	926	1149	1605	745	1106	1372	1255	941	801	763	949	772	411	2375	670	1113	552	1646	832	1542	1379	844	1064	1339	1201	750	619	649	852	915	1080	318	2108	607	1059	530	1729	1317	864	1473	1064	881	1144	1145	690	1289	1177	666
230	1960	930	1405	1361	776	1358	1349	1252	823	646	878	949	848	410	2418	612	1154	554	1795	982	1329	1427	932	1192	1286	1238	762	697	715	751	971	894	337	2160	705	804	637	1779	1205	933	1347	1119	856	1139	1223	748	1149	1049	660
231	1869	869	1405	1330	688	1326	1365	1281	766	877	894	763	883	498	2478	462	972	698	1589	922	1467	1495	796	1158	1320	1108	693	744	673	985	850	891	431	2130	484	1176	642	1856	1348	1073	1438	930	877	990	1113	747	1164	1094	627
232	1942	737	1132	1483	936	1750	1331	1401	909	772	757	800	1024	364	2440	472	1055	500	1637	984	1491	1364	902	1188	1472	1287	721	775	636	829	918	940	292	1999	607	1049	693	1816	1382	838	1410	985	804	1048	1143	756	981	1202	721
233	1850	891	1327	1377	711	1614	1373	1388	894	521	772	919	843	276	2440	665	622	599	1593	962	1353	1352	888	1037	1318	1244	773	697	694	945	956	928	386	2106	750	946	661	1942	1244	885	1412	1166	1002	1010	1182	840	1149	1027	749
234	1744	941	1254	1382	724	1175	1382	1229	707	622	770	866	977	497	2386	536	1029	347	1405	980	1346	1358	942	1101	1535	1099	817	762	625	914	848	983	376	2129	589	1016	669	1995	1358	879	1498	1029	847	1046	1346	938	920	1277	650
235	1724	820	1249	1261	875	1391	1334	1368	831	693	810	811	919	452	2589	519	901	651	1771	1007	1775	1364	964	1129	1362	1016	782	533	705	883	1075	973	345	2147	614	1087	662	1828	1260	872	1309	910	762	1156	1062	814	1417	1124	748
236	2063	870	1224	1462	906	1609	1404	1329	806	800	633	815	1027	440	2442	651	940	526	1619	784	1477	1396	919	1032	1291	1086	990	776	567	812	779	825	343	2059	603	1278	561	1652	1265	983	1356	879	1010	1045	1117	693	1087	1013	649
237	1754	981	1363	1479	736	1503	1424	1326	659	842	652	782	942	424	2599	500	1152	399	1816	1052	1375	1419	923	1057	1386	1250	724	703	523	645	858	840	339	2221	646	1202	422	1821	1158	849	1372	993	900	1145	1154	746	990	1015	705
238	1808	1021	1243	1318	712	1665	1403	1344	772	852	904	879	861	413	2441	596	1041	668	1582	849	1421	1313	905	1112	1245	1317	716	784	651	844	935	844	275	2119	399	1162	644	1775	1344	759	1579	979	874	1149	1134	713	1048	1133	632
239	1979	991	1347	1533	855	1304	1510	1226	810	879	790	917	908	377	2343	749	1005	468	1670	916	1426	1437	842	1117	1484	1249	687	720	491	889	956	900	299	2049	499	1081	698	1987	1256	896	1462	1030	933	1143	1131	898	964	995	618
240	1861	876	1320	1364	742	1470	1274	1444	988	795	698	817	912	383	2453	585	883	626	1652	895	1605	1337	808	1228	1231	1339	805	695	761	899	764	972	477	2039	494	978	704	1706	1227	1012	1361	1167	843	1058	1083	840	1166	1056	740
241	1958	1093	1189	1386	852	1246	1380	1235	696	962	750	911	742	325	2413	475	1096	474	1668	869	1409	1334	843	1112	1200	1316	762	954	680	794	769	907	436	2267	476	1143	717	1720	945	793	1491	1081	858	978	1119	659	1221	1054	887
242	1793	951	1386	1316	724	1289	1402	1245	634	635	766	969	882	375	2324	453	1063	525	1865	1011	1300	1247	745	1224	1290	1353	754	705	753	965	985	714	417	2272	630	1026	673	1776	1374	788	1337	1129	948	1034	1194	844	1121	1171	674
243	1878	692	1360	1274	815	1208	1409	1291	895	686	609	840	768	406	2338	612	1160	503	1569	898	1560	1429	653	1199	1418	1224	763	736	802	923	934	897	438	2138	593	1075	746	1749	1088	799	1331	1037	819	1058	1099	629	1199	875	591
244	1865	711	1421	1552	882	1164	1320	1036	753	524	676	912	1017	377	2369	513	1039	659	1668	856	1441	1464	772	1089	1342	1180	679	790	652	965	913	830	490	2208	601	989	595	1669	1325	834	1417	969	866	936	1179	786	1170	1105	669
245	1788	1216	1408	1447	785	1344	1405	1394	769	629	768	883	927	446	2410	540	1042	595	1769	1018	1445	1283	858	1061	1404	1385	704	728	763	811	825	985	462	2052	600	1128	667	1923	1281	849	1469	977	850	947	1130	659	1026	1094	721
246	1774	890	1369	1367	781	1379	1524	1164	712	495	744	834	732	232	2374	532	1234	700	1715	930	1488	1312	896	1053	1328	1459	672	726	682	905	766	801	354	2152	630	1149	585	1790	1308	824	1309	878	835	993	1112	574	976	954	625
247	1793	883	1333	1414	776	1154	1328	1062	769	622	717	1069	773	427	2492	558	987	438	1853	954	1484	1310	939	1236	1433	1431	823	668	617	848	991	776	459	2062	730	1027	595	1884	1126	806	1284	1008	898	1012	1198	861	1217	863	615
248	1927	1051	1226	1516	938	1258	1374	1220	826	800	770	721	966	454	2389	687	1126	443	1801	1000	1378	1344	812	1213	1251	1179	796	626	584	725	749	1016	584	2249	559	1139	676	1895	1304	741	1317	1098	780	1056	1061	906	941	928	642
249	1867	862	1390	1322	719	1570	1503	1404	857	571	666	960	911	491	2374	536	1004	518	1468	1040	1363	1296	819	1154	1312	1330	682	717	610	866	813	859	431	2139	522	1228	688	1925	1298	656	1358	947	894	1232	1079	821	984	1234	624
250	1902	826	1219	1436	856	1669	1488	1213	769	578	791	757	943	479	2325	557	1131	520	1744	1033	1457	1358	903	1085	1354	1323	1056	567	713	900	683	808	380	2001	433	1014	697	1800	1211	920	1308	970	987	1385	1164	833	1005	967	613
251	1859	963	1258	1515	800	1229	1423	1406	791	624	783	1003	929	373	2350	401	1118	531	1709	1039	1515	1492	766	1003	1409	1448	825	580	660	818	789	1124	391	2165	444	1024	729	1818	1166	779	1283	981	814	1157	1042	665	1124	1023	567
252	1930	774	1220	1352	1034	1570	1430	1309	739	911	764	1003	960	533	2416	539	1077	688	1783	896	1340	1409	914	1116	1372	1189	852	629	703	920	940	1047	434	2204	625	1106	722	1763	1237	744	1402	1129	795	1059	1194	756	1244	974	729
253	1943	888	1249	1279	933	1230	1318	1330	695	521	655	993	784	360	2410	539	1167	604	1864	951	1327	1332	894	1134	1301	1005	1033	637	531	785	878	1036	460	2254	552	1063	434	1800	1275	754	1525	843	814	1160	1121	692	1060	927	659
254	1898	820	1321	1580	909	1283	1424	1256	764	750	830	768	938	380	2207	609	1116	642	1602	966	1464	1456	918	938	1250	1526	842	554	597	899	785	908	499	2260	539	1035	767	1803	1212	859	1384	943	831	1021	1004	740	1064	937	605
255	1856	842	1136	1311	786	1363	1337	1304	855	648	789	887	887	290	2445	372	1260	529	1549	971	1438	1446	829	964	1211	1198	674	587	619	748	788	928	557	2255	408	1138	680	1791	1130	631	1419	994	840	1095	1227	776	1131	1069	987
256	2008	928	1229	1414	877	1611	1297	1326	874	702	914	1060	675	380	2443	410	957	652	1516	890	1425	1506	898	1206	1340	1294	986	686	751	984	815	781	422	2327	565	1054	506	1853	1220	760	1517	884	823	1031	1231	836	1045	943	606
257	1960	959	1351	1397	951	1284	1346	1059	731	763	729	884	966	411	2394	452	992	622	1682	1101	1385	1409	842	1036	1451	1266	916	668	646	818	842	943	421	2134	627	760	738	1837	1286	844	1442	1081	737	946	1116	867	1000	907	755
258	2101	899	1212	1379	931	1578	1584	1257	760	718	910	654	751	431	2515	489	1130	593	1708	885	1407	1533	1052	1169	1252	1466	823	462	712	821	846	901	360	2254	591	960	649	1760	1224	806	1462	919	774	995	1247	635	1119	946	852
259	1898	792	1263	1351	845	1560	1350	1272	859	678	772	879	884	432	2457	488	1018	596	1809	802	1591	1448	801	902	1382	1495	783	488	582	712	847	918	369	2294	460	1010	668	1781	1300	917	1432	1013	734	1235	1091	819	1113	1134	923
260	1879	935	1228	1471	883	1377	1409	1170	816	619	642	903	706	432	2209	455	1058	621	1846	986	1503	1291	818	1091	1329	1157	964	553	630	735	746	838	378	2175	626	1079	707	1861	1201	762	1306	1169	707	1069	1027	858	1110	883	861
261	2127	839	1271	1369	667	1147	1425	1217	718	870	626	921	867	511	2432	573	1027	705	1873	1020	1403	1398	926	1348	1257	1179	856	619	664	880	883	883	424	2343	462	1110	649	1879	1278	735	1439	870	857	832	1095	801	1120	1189	809
262	1910	941	1437	1391	939	1336	1547	1257	793	770	802	959	913	341	2435	511	1070	627	1666	1051	1646	1371	711	1107	1419	1428	922	558	623	894	723	906	379	2071	579	1100	624	1753	1271	878	1288	952	766	957	1133	734	1171	1178	687
263	1865	1007	1216	1387	983	1247	1316	1242	961	727	742	733	803	471	2343	470	1144	587	1508	925	1491	1371	925	1016	1230	1319	846	693	816	819	800	947	370	2167	603	1131	570	1872	1165	829	1228	974	777	1044	1140	734	1121	1079	765
264	2024	687	1372	1400	916	1254	1350	1291	883	623	799	980	771	402	2345	546	1064	597	1595	1013	1412	1318	758	1015	1444	1202	726	607	759	896	825	886	327	2161	544	1136	497	1673	1191	700	1540	847	913	1053	1111	870	872	939	621
265	2069	679	1334	1429	909	1400	1397	1274	856	659	679	843	1024	421	2580	484	1033	614	1479	923	1383	1384	881	1096	1291	1427	724	555	686	912	810	1017	248	2207	684	1019	598	1757	1137	720	1404	1005	755	1022	1192	715	1092	970	658
266	1937	1141	1281	1420	953	1354	1412	1069	804	693	724	813	855	528	2459	507	1069	537	1909	923	1287	1423	775	1012	1134	1187	795	518	762	749	952	857	308	2221	404	807	810	1838	1194	649	1434	974	855	999	1167	653	1068	1213	538
267	1975	824	1327	1369	836	1661	1337	1262	739	748	847	837	895	377	2409	513	1113	419	1833	1003	1378	1272	910	982	1330	1070	762	486	791	794	875	901	474	2076	493	988	667	1729	1132	970	1608	1218	1079	1034	1020	749	1272	936	630
268	2135	741	1330	1364	807	1275	1421	1325	877	695	874	949	859	463	2342	524	1093	575	1593	886	1471	1313	828	1120	1379	1418	793	720	636	798	707	1021	359	2083	528	1000	768	2004	1134	747	1489	896	739	1019	1049	785	1203	1032	863
269	2032	937	1365	1401	815	1313	1377	1060	718	778	725	835	867	469	2409	521	1107	466	1486	1153	1450	1458	849	1159	1416	1261	940	653	671	867	915	941	494	2270	588	932	738	1801	1186	764	1335	865	882	1033	1049	644	1202	944	732
270	1917	941	1353	1645	783	1764	1480	1441	807	703	803	812	884	472	2292	394	1219	496	1701	1082	1382	1414	892	1073	1396	1140	856	768	582	848	962	840	460	2381	696	1152	805	1928	1185	660	1438	1097	928	1021	1119	779	1295	997	785
271	1923	938	1086	1370	880	1318	1493	1428	734	601	809	858	945	543	2331	521	992	511	1422	1006	1424	1342	803	996	1313	1229	793	634	737	844	911	858	358	2091	600	883	638	1905	1245	911	1481	803	938	899	1061	839	1214	1075	705
272	2024	827	1416	1405	934	1617	1280	1401	646	548	816	724	905	438	2204	512	1099	608	1720	872	1499	1585	871	1040	1322	1293	784	508	635	830	793	889	331	2121	563	1116	706	1756	1193	899	1491	882	932	1170	1096	681	1120	950	661
273	1969	809	1234	1489	914	1234	1440	1197	763	640	1005	809	797	529	2231	361	948	554	1613	948	1233	1378	942	1023	1474	1337	928	670	705	848	787	965	389	2362	562	920	586	1744	1198	638	1363	942	754	1181	1091	647	1226	1069	795
274	2010	863	1340	1225	837	1190	1428	1114	791	644	720	920	831	493	2292	529	1026	393	1664	1047	1519	1549	835	1139	1415	1431	776	622	686	819	897	909	400	2253	564	976	851	1645	1317	707	1434	1049	738	1034	1249	670	1013	974	609
275	2084	836	1321	1432	854	1345	1534	1060	890	709	854	856	926	415	2226	475	1002	441	1727	990	1392	1380	996	1158	1225	1243	798	717	852	798	877	664	421	2067	540	1105	605	1765	1168	1039	1394	1081	973	985	1145	757	1110	979	610
276	1933	966	1316	1508	831	1331	1412	1272	784	706	780	895	843	415	2310	419	1083	410	1478	1006	1520	1374	888	1113	1326	1379	853	614	600	821	804	972	314	2082	678	794	504	1900	1265	989	1328	912	819	1040	1117	787	1088	1091	881
277	1892	979	1212	1545	1011	1239	1342	1122	1015	686	767	927	901	515	2276	402	1006	625	1752	862	1420	1430	949	1037	1264	1296	608	721	762	822	868	852	437	2136	448	1083	709	1749	1306	917	1415	975	774	1057	1292	818	1132	1130	675
278	1914	717	1408	1416	738	1439	1539	1214	742	769	766	935	1029	461	2121	468	1203	484	1693	996	1350	1375	910	985	1389	1234	798	694	811	906	890	881	384	2157	456	1220	755	1785	1281	594	1472	1044	878	1023	1197	711	1052	1073	649
279	2072	768	1097	1211	952	1333	1206	1195	690	724	748	887	998	448	2072	595	1089	473	1459	933	1257	1368	892	1048	1228	1312	976	625	729	1044	697	779	343	2151	573	931	544	1682	1117	705	1446	1017	869	1089	1191	861	1001	1063	773
280	1708	932	1252	1330	802	1290	1356	1272	734	585	840	934	825	366	2184	584	999	527	1484	878	1382	1457	956	1082	1452	1190	923	617	734	833	967	788	406	2201	684	1095	755	1913	1311	1046	1312	887	884	1007	1129	990	974	913	751
281	2025	998	1301	1438	857	1247	1393	1472	701	766	817	908	913	477	2170	493	993	500	1431	1029	1400	1348	864	1086	1353	1246	737	557	695	807	745	799	434	2263	435	1135	719	1812	1300	678	1313	1103	965	934	989	666	1138	987	704
282	2106	1053	1301	1406	654	1411	1339	1363	837	633	635	825	858	550	2154	599	979	436	1458	999	1468	1368	861	1202	1511	1242	720	629	784	902	862	1072	382	2177	517	1042	771	1822	1235	847	1344	968	805	840	1028	734	1162	717	763
283	1991	815	1396	1401	907	1342	1339	1207	811	495	821	1071	1020	454	2115	539	1002	532	1526	898	1428	1272	815	1121	1411	1177	892	584	639	865	793	806	436	2129	440	1089	672	1912	1201	878	1497	1064	1037	1131	1018	727	1087	1105	831
284	1921	754	1574	1366	974	1247	1474	1188	907	706	809	892	908	545	2196	567	1012	309	1654	831	1454	1452	1010	1059	1417	1376	876	546	832	925	932	904	390	2193	617	1073	634	1917	1124	793	1413	1126	929	922	1076	660	1116	870	838
285	1845	913	1321	1395	750	1282	1489	1369	806	642	648	951	1012	615	2287	651	979	525	1516	838	1475	1503	1057	1014	1334	1203	758	489	730	802	795	915	399	2276	622	1144	745	1848	1276	937	1381	779	800	1023	1202	824	1057	1013	703
286	1772	1024	1336	1344	753	1274	1403	1340	776	556	615	863	890	506	2074	533	969	542	1813	1008	1364	1439	861	1171	1264	1212	763	641	911	901	847	945	297	2244	465	974	771	1865	1279	836	1368	1025	726	978	1107	746	1042	1075	808
287	1988	847	1233	1368	674	1268	1423	1104	785	604	738	759	935	547	2229	521	1121	527	1597	811	1329	1426	958	1157	1380	1222	835	773	804	838	835	894	234	2190	328	813	698	1852	1325	837	1368	962	898	1042	1222	842	1179	923	480
288	2073	1152	1355	1369	880	1141	1287	1358	618	794	808	869	977	423	2217	586	1029	550	1445	1003	1364	1408	741	1100	1195	1190	886	585	608	936	753	957	473	2139	404	1066	621	1767	1229	1028	1248	1156	788	1191	1138	700	1177	1038	744
289	2044	931	1506	1405	817	1197	1425	1084	812	705	740	842	1005	513	2113	630	900	431	1772	1033	1445	1493	987	1072	1484	1280	810	659	606	832	774	830	346	2136	453	1129	810	1672	1210	888	1411	916	687	1091	1166	748	1091	878	800
290	2054	780	1384	1462	959	1214	1325	1492	842	610	625	864	895	542	2097	597	1136	528	1510	900	1376	1470	906	1071	1399	1137	789	655	777	731	918	821	356	2397	498	1078	764	1684	1147	878	1467	1052	994	1056	1043	784	1059	1141	761
291	1975	1146	1299	1449	856	1197	1394	1081	810	630	856	883	924	485	2050	550	1100	685	1598	843	1278	1388	894	1176	1498	1395	868	566	695	928	800	856	350	2192	494	660	614	1722	1173	852	1398	1098	743	1114	1177	798	938	1078	623
292	2000	865	1240	1440	827	1323	1299	1239	737	670	794	955	919	523	2307	456	1105	371	1699	828	1327	1315	835	1160	1274	1322	730	609	708	967	818	922	402	2335	411	969	535	1924	1053	988	1301	950	783	1083	1150	778	1108	1082	906
293	2034	862	1303	1438	705	1425	1398	1205	707	534	760	899	1042	583	2045	551	1158	630	1699	1015	1230	1239	918	1199	1259	1246	823	776	631	785	818	819	343	2320	471	1016	646	1633	1243	924	1415	1010	893	1182	1088	747	1118	947	625
294	1939	947	1304	1265	760	1381	1437	1262	797	582	679	1033	1002	479	2103	407	1045	333	1507	923	1402	1417	898	1183	1306	1323	775	629	683	897	1003	854	345	2254	488	1046	905	1715	1200	848	1507	1216	981	1071	1126	719	1218	1113	847
295	2088	943	1264	1505	791	1272	1536	1357	756	984	870	1191	1030	591	2193	392	1198	559	1676	913	1289	1475	957	1065	1263	1287	895	568	734	942	917	850	354	2110	510	670	397	1740	1272	982	1418	1191	864	1059	1268	723	1152	1052	582
296	1947	1084	1389	1430	709	1603	1384	1483	714	818	694	812	995	625	1912	487	950	422	1722	994	1362	1506	889	1147	1258	1037	888	609	728	970	808	992	461	2190	520	1017	540	1737	1146	875	1367	896	814	952	926	707	1044	1154	737
297	1920	782	1298	1364	843	1291	1251	1353	702	503	854	893	1075	375	2051	550	1005	492	1558	935	1372	1528	879	1062	1368	1313	903	720	641	932	924	909	455	2123	528	908	775	1816	1140	932	1334	1073	855	1200	1256	658	1150	1012	553
298	2159	924	1292	1491	832	1143	1321	1456	659	690	777	825	948	359	2222	509	930	669	1647	972	1128	1458	918	1290	1403	1266	786	609	606	925	764	899	533	2120	501	914	566	1907	1046	736	1461	933	709	1447	1265	810	1031	1060	667
299	1837	728	1355	1368	775	1301	1413	1389	894	673	703	1020	1005	483	1904	320	884	687	1352	1024	1289	1263	862	1198	1257	1540	807	644	686	865	861	945	390	2125	593	983	589	1693	1260	1015	1394	1025	829	1145	1230	755	1054	1136	553
300	1991	867	1311	1192	880	1302	1339	1373	721	700	735	949	1072	383	1991	381	1086	564	1745	885	1368	1412	876	1045	1315	1462	748	628	608	875	819	1021	422	2052	456	925	823	1939	1203	943	1488	1086	744	1212	1254	808	992	942	651
301	2138	839	1333	1450	746	1344	1383	1359	598	678	667	882	968	516	2018	379	1158	531	1480	1063	1293	1470	792	1380	1379	1218	893	643	510	889	947	815	417	1983	537	959	669	1876	1317	933	1346	1106	814	942	1364	817	1280	1101	698
[truncated: 141 more columns]

## Sheet: WT, unc9unc7
Figures 2E, 2S-1BtoD, 5S-4G, 4S-2H
AIA::GCaMP5A F(A.U.)
Stimulus:	1.15 µM diacetyl
Genotype:	WT
N:	1	2	3	4	5	6	7	8	9	10	11	12	13	14	15	16	17	18	19	20	21	22	23	24	25	26	27	28	29	30	31	32	33	34	35	36	37	38	39	40	41	42	43	44	45	46	47	48	49
Frame (Pulse at 100)
1	1795	1102	431	560	962	303	652	637	664	787	366	336	1704	1098	528	727	742	392	701	695	678	867	490	276	1803	1883	1175	1178	1288	979	1456	1552	1241	1622	757	1558	760	1137	2006	1243	856	893	1173	1661	882	1846	1041	1149	987
2	2089	983	552	606	825	492	710	583	642	968	385	259	1667	979	484	569	643	391	678	708	582	768	356	373	1776	1905	1039	1051	1249	1234	1334	1364	1110	1854	920	1744	810	1372	1843	1217	862	910	983	2020	999	1569	1032	1268	707
3	1937	1011	514	462	790	534	594	748	835	914	409	462	1907	1004	644	611	619	378	571	742	700	830	336	331	1852	1761	1214	1149	1347	961	1207	1442	1246	1605	866	1836	780	1267	2071	1306	887	1091	1147	1856	922	1740	1170	1113	788
4	1836	1264	510	588	903	333	631	798	569	940	380	351	1848	1003	430	546	722	380	736	720	937	859	396	420	1883	1874	1394	1255	1393	969	1274	1390	1200	1739	1070	1616	772	1258	1887	1143	795	1063	1161	1577	1048	1366	1111	1177	804
5	1722	1135	466	623	894	342	575	670	595	914	349	411	1825	945	559	590	701	316	688	686	751	734	342	230	1734	1844	1073	1175	1257	1193	772	1458	1169	1593	635	1720	886	1225	2073	1177	980	827	1037	1699	1011	1852	1130	1204	921
6	2071	1068	357	649	824	328	681	586	651	891	435	300	1796	917	593	581	597	267	550	678	715	840	348	398	1921	1845	1123	1314	1296	1031	1216	1375	1181	1786	1016	1757	819	1460	1908	1310	995	941	1149	2091	972	1463	1302	1278	926
7	1396	1034	390	664	824	294	689	589	660	905	500	307	1852	1002	590	610	686	504	507	669	825	810	445	378	1793	2025	1163	1197	1373	1098	1355	1370	1165	1648	755	1664	757	1334	2136	1096	992	959	1054	1810	1069	1565	910	1252	770
8	1703	1102	600	578	732	381	596	694	605	901	312	408	1675	1044	499	673	749	412	593	747	636	876	225	321	1914	1811	1051	1057	1213	1179	1328	1336	1027	1776	534	1632	873	1247	1820	1330	733	903	1174	2095	1074	1536	1030	1202	976
9	2008	773	404	647	861	444	675	679	690	896	449	258	1778	1011	657	713	704	425	575	577	691	759	451	248	1722	1860	1098	1365	1387	1170	1311	1432	1168	1636	1088	1810	616	1295	1770	1234	826	888	1113	2105	1014	1543	1009	1298	1011
10	1997	1010	488	479	654	446	548	648	669	844	365	330	1848	1047	572	582	714	351	672	691	784	748	415	403	1656	1836	1072	1080	1321	901	1315	1303	1103	1848	792	1673	786	1415	1918	995	880	954	1257	2108	1150	1562	926	1434	998
11	2003	982	649	629	744	309	603	668	797	961	460	412	1682	1104	605	660	743	381	686	662	743	841	423	399	1588	1727	1018	1238	1348	1106	1307	1445	1181	1520	799	1668	820	1248	2009	1355	892	812	1090	1659	1006	1671	1249	1005	1012
12	1909	1096	493	658	870	372	674	657	808	749	257	326	1765	960	491	640	662	485	529	693	641	1002	425	381	1753	1931	1065	1259	1330	1244	1143	1382	1052	1673	701	1743	772	1303	1801	1153	835	804	1220	1927	1208	1741	1036	1181	934
13	2109	1004	498	767	883	367	563	657	750	854	424	352	2015	1035	492	528	726	343	605	699	597	917	438	437	1888	1964	1230	1247	1332	1028	1294	1450	1062	1663	663	1652	748	1401	2088	1192	718	859	1230	2209	1091	1593	1230	1194	722
14	1988	853	665	561	892	391	699	669	867	871	470	424	1742	994	598	589	749	295	545	704	599	835	347	326	1748	1809	1163	1358	1236	1069	1513	1351	1177	1744	645	1769	810	1331	2094	1146	797	990	1181	1801	1112	1553	1105	1274	943
15	1797	1247	482	583	843	337	591	730	641	784	452	333	1899	1015	498	619	677	346	569	685	650	813	302	304	1797	1888	1251	1349	1213	1110	1408	1272	1123	1755	713	1597	637	1236	2316	1083	1010	1055	1146	2412	1135	1523	940	1306	897
16	2031	1038	468	521	861	508	747	790	615	863	273	462	1797	968	402	543	579	236	356	729	610	934	391	281	1697	1710	1203	1096	1421	1001	1247	1495	1040	1567	827	1665	805	1366	2236	1256	820	1053	1120	2289	1296	1476	1067	1212	762
17	1908	1014	480	575	822	429	530	669	637	898	279	336	1789	1068	567	562	589	377	615	717	675	812	465	340	1864	1849	1010	1214	1217	1189	1452	1560	1081	1610	689	1619	765	1396	2087	1283	718	862	1339	1880	1374	1791	1174	1201	804
18	2180	1169	502	563	857	445	673	598	602	892	367	210	1741	949	490	541	657	515	642	820	797	884	420	397	1673	1774	850	1070	1270	1209	1254	1490	1092	1578	811	1677	775	1568	2167	1150	945	1078	1039	2272	1159	1536	1041	1429	988
19	1981	1006	543	596	793	328	516	699	681	807	416	377	1783	1005	601	568	688	459	600	754	703	824	446	384	1910	1810	1215	1181	1363	1186	1463	1384	1118	1696	557	1679	811	1415	2178	1129	880	806	1106	2709	1402	1359	1075	1130	827
20	1905	1069	346	605	818	327	728	626	724	960	310	331	1841	957	367	624	663	409	484	749	606	910	295	391	1860	1959	1071	1294	1160	1228	1270	1427	938	1691	909	1699	871	1497	1910	1225	861	836	1189	2132	1364	1592	909	1296	846
21	1899	1021	292	588	815	412	665	726	742	831	433	407	1796	1116	593	600	627	402	601	729	731	778	304	300	1732	1916	1259	1187	1266	994	1443	1360	1112	1602	837	1838	751	1410	1998	1116	908	898	1180	2596	1327	1717	1142	1101	776
22	2094	1115	533	630	872	384	534	672	774	854	418	490	1806	994	451	752	632	529	743	688	748	976	356	463	1821	1726	1144	1203	1428	1059	1315	1356	1019	1709	779	1808	955	1178	2078	1097	920	921	1054	2834	1069	1626	956	1169	798
23	2011	1006	495	706	885	537	510	761	602	847	341	360	1753	1129	531	585	737	606	647	613	617	781	423	289	1587	1829	1138	1208	1403	975	1314	1266	1268	1755	584	1471	636	1278	2123	1179	996	1018	1052	3159	1614	1631	1011	1109	816
24	1948	1130	412	640	923	421	653	646	636	980	284	485	1813	1079	464	645	628	433	640	899	687	875	468	441	1707	1816	1050	1271	1388	1139	1298	1223	1233	1708	543	1599	730	1359	2051	1142	952	836	881	3261	1253	1591	832	1163	862
25	2089	950	722	620	806	384	630	747	743	951	313	364	1909	924	490	708	777	309	549	615	690	882	414	240	1748	1909	1096	1128	1288	1096	1707	1498	1187	1450	742	1617	919	1260	2321	1279	782	1137	1115	3404	1174	1750	1075	1082	894
26	1994	1052	492	490	680	296	654	730	586	806	359	375	1892	890	521	685	729	337	598	664	684	834	304	346	1737	1994	1236	1263	1296	1058	1737	1406	1250	1623	632	1660	752	1341	1951	1148	857	856	927	3433	1237	1461	1028	1240	855
27	2015	965	441	577	928	440	596	660	727	979	334	376	1788	1068	536	539	629	394	604	756	654	880	448	446	1676	1773	1045	1195	1337	1111	1563	1235	1073	1645	763	1767	741	1301	2141	1196	952	1122	1141	3444	1238	1648	1088	1145	789
28	2009	1116	401	466	760	403	673	721	640	774	358	509	1918	978	406	736	551	385	657	843	689	880	462	521	1701	1852	976	1172	1124	1026	1502	1455	1195	1570	705	1761	866	1316	2097	1302	905	811	1019	3634	1390	1815	918	1127	878
29	2009	1106	525	590	789	331	531	665	594	839	368	402	1885	1006	562	714	708	299	598	653	684	1003	373	370	2079	1842	1253	1380	1258	1054	1367	1587	1013	1761	672	1700	692	1295	1924	1140	1016	893	1255	2007	1316	1700	1014	1223	882
30	1725	1092	474	732	796	379	694	709	723	807	502	261	1820	1084	593	711	644	455	601	670	710	919	387	402	1821	1902	1126	1218	1309	1091	1753	1460	1289	1595	697	1913	735	1225	2109	1249	922	955	1067	3506	1167	1558	921	1349	1240
31	1981	889	464	586	875	505	630	776	752	906	450	378	1788	984	578	635	581	421	679	609	762	857	406	303	1662	1770	1143	1380	1142	1065	999	1295	1364	1851	993	1749	813	1237	2219	1143	855	1042	1156	2645	1138	1620	864	1281	1355
32	1856	1058	459	491	762	491	595	789	681	821	372	492	1740	1001	541	526	660	542	513	694	670	949	402	447	1922	1760	1115	1161	1113	1161	1739	1276	1261	1604	797	1587	639	1178	2132	1343	915	1257	1217	3244	1404	1670	844	1170	1879
33	1996	944	548	566	882	439	664	576	617	738	356	445	1751	773	565	519	662	415	650	811	625	937	324	442	1742	1634	1409	1339	1160	1092	987	1391	1148	1689	711	1653	849	1406	1923	1195	937	855	1144	3185	1358	1716	1081	1251	1910
34	2107	1082	658	540	777	384	511	564	631	888	378	499	1881	943	578	563	757	239	599	728	708	877	460	344	1647	2053	1226	1370	1317	1135	1733	1467	1184	1686	998	1484	782	1245	2169	1158	848	918	1237	3093	1298	1710	914	1274	1947
35	1895	937	406	690	708	429	588	748	677	794	396	543	1901	1051	506	625	759	447	647	689	642	964	508	331	1934	1886	1155	1289	1302	1293	1409	1384	1184	1688	962	1679	864	1227	2364	1311	868	1174	1011	3336	1532	1543	987	1248	1860
36	1891	1152	460	585	957	398	582	629	750	759	405	513	1741	1061	649	561	717	385	621	725	648	893	354	402	1898	1896	1145	1301	1226	1123	1616	1466	1341	1548	730	1568	737	1327	2063	1008	792	809	1112	3101	1388	1656	1006	1136	2075
37	1893	1176	411	433	586	418	752	788	737	904	414	406	1894	980	615	619	824	478	571	635	919	861	390	339	1541	1775	1132	1263	1429	1181	1682	1440	1178	1698	589	1494	856	1265	1894	1187	1069	949	956	2957	1335	1624	1066	1195	1895
38	1803	1188	359	527	765	414	639	830	710	945	444	423	1799	892	425	555	651	409	694	747	663	1008	407	220	2003	1845	1042	1260	1279	1209	1528	1464	1194	1652	941	1854	732	1057	2216	1052	806	740	1019	3028	1558	1577	1051	1301	2146
39	1894	1139	470	674	761	263	577	716	637	872	325	342	1677	1109	504	649	814	319	540	743	776	801	384	479	1766	1821	1094	1317	1317	913	1515	1608	1168	1661	835	1667	704	1117	1901	1084	917	1161	1223	3152	1534	1704	1010	1172	2131
40	1934	1081	537	608	916	397	702	832	781	951	348	437	1728	1163	619	772	653	594	658	667	641	950	304	486	1863	1948	1252	1417	1419	1264	1429	1257	1172	1800	902	1756	802	1402	2067	1135	844	911	1044	2706	1551	1741	994	1231	2067
41	1997	839	320	495	727	487	604	675	694	768	498	446	1685	930	471	696	700	320	667	732	651	812	338	221	1855	1863	1416	1192	1307	968	1825	1348	1299	1597	1015	1586	769	1113	1937	1088	873	901	1295	2967	1533	1681	718	1210	1893
42	1837	1055	384	544	744	470	513	735	657	974	320	492	1863	1159	509	585	816	442	671	712	697	914	400	279	1891	1834	1137	1176	1250	1193	996	1315	1284	1813	656	1630	744	1181	2012	1186	834	885	1121	2942	1588	1493	835	1142	2029
43	1979	1107	440	662	601	346	607	728	692	884	458	478	1868	1067	478	599	699	360	615	766	664	830	392	393	1789	1786	1118	1360	1186	1206	1742	1415	1173	1644	665	1372	622	1309	2037	1102	866	879	1114	2460	1518	1461	953	1264	1826
44	1677	1113	390	553	741	413	728	650	747	800	298	398	1835	719	592	590	550	480	640	721	763	789	421	332	1682	1763	1194	1191	1348	1107	1781	1609	1028	1445	687	1261	552	1320	2282	1256	957	1137	1012	2835	1541	1646	860	1247	1917
45	1930	1230	433	707	783	417	729	764	727	797	380	489	1678	918	622	639	722	472	622	806	612	852	280	311	1674	1818	1049	1290	1036	1136	1853	1314	1090	1947	959	1272	746	1143	2019	949	875	1117	1047	2811	1605	1711	867	1162	1921
46	1845	1157	380	577	734	390	490	804	599	816	550	207	1705	1110	766	615	754	350	692	742	776	971	408	416	1707	1762	1196	1374	1250	1280	1407	1290	1217	1659	787	1294	769	1378	1736	1155	768	1070	1168	2708	1519	1471	1200	1222	1892
47	1973	1107	390	701	667	446	698	682	622	771	346	421	1794	1029	522	747	726	444	487	597	611	921	386	334	1848	1933	1199	1165	1430	1145	1507	1392	1223	1647	1024	1243	663	1184	2145	1201	947	812	982	2660	1390	1497	1009	1082	1830
48	2022	991	600	575	749	374	638	729	690	867	508	266	1869	803	504	529	709	449	649	612	757	800	437	362	1674	1831	1107	1143	1261	1176	1846	1276	1366	1715	1036	1349	712	1116	1891	1295	979	1055	1085	2654	1383	1700	992	1201	1735
49	1853	999	330	581	652	412	654	706	658	900	418	370	1766	1070	594	709	740	391	577	755	737	964	484	309	1513	1857	1142	1430	1422	1041	1341	1487	1157	1618	969	1291	759	1237	2108	1264	936	957	1269	2654	1656	1563	888	1260	1773
50	1801	1037	585	592	732	412	621	729	556	776	444	380	1949	1014	506	675	705	366	698	735	579	944	371	332	1655	1760	1174	1267	1183	1132	1421	1407	1296	1778	550	1286	653	1310	2030	973	779	882	1039	2784	1606	1522	1049	1205	1543
51	1777	1103	361	689	764	429	755	639	716	945	422	206	1857	993	478	695	733	334	654	661	690	905	497	309	1782	1606	1094	1083	1112	1207	1465	1347	1260	1717	739	1253	753	1411	1892	1038	799	1083	979	2595	1758	1512	1006	1247	1791
52	1840	1089	458	536	792	357	716	766	502	1128	456	516	1754	1053	530	567	777	497	673	834	638	895	427	491	1609	1974	1178	1429	1375	1110	1694	1307	1159	1632	548	1413	775	1247	2096	1066	894	1000	1138	2694	1789	1415	865	1229	1717
53	1992	1144	471	636	856	412	699	600	651	859	497	334	1999	1092	523	597	664	486	445	770	482	834	578	490	1548	1914	1210	1274	1282	1230	1509	1344	1198	1750	824	1425	735	1299	2169	1077	952	896	1056	2536	1365	1471	837	1429	1656
54	1685	1178	523	654	791	420	638	767	535	822	310	429	1764	854	620	766	747	418	791	665	756	905	385	399	1695	1960	1185	1232	1271	1050	1209	1287	1063	1794	978	1169	799	1259	2225	1245	806	752	1161	2771	1350	1489	1059	1396	1635
55	2013	992	428	455	785	353	664	687	808	835	518	282	1882	882	452	662	748	503	672	749	661	868	332	350	1759	1818	1043	1211	1261	1069	1854	1281	1163	1662	1364	1108	684	1328	1987	1110	843	802	1037	2528	1324	1575	874	1300	1516
56	1969	1046	418	559	813	415	674	685	796	884	358	262	1802	1046	475	606	655	347	535	694	672	872	423	392	1767	1838	1047	1210	1326	1086	1694	1192	1218	1509	883	1202	806	1332	1852	1086	864	1013	1129	2470	1165	1562	790	1338	1617
57	1954	1217	473	539	793	333	704	629	654	827	423	288	1741	973	742	483	740	366	548	709	777	872	458	341	1858	1780	1155	1292	1327	1151	1782	1219	1219	1660	969	1340	754	1270	1834	999	895	961	1199	2558	1409	1411	898	1217	1557
58	1899	858	527	551	853	330	708	526	743	946	453	355	1783	1092	597	688	564	488	761	654	772	992	395	205	1917	1790	1072	1239	1365	1028	1307	1392	1268	1482	935	1378	712	1266	1676	1199	1024	1005	1127	2392	1245	1556	1038	1207	1555
59	1861	1070	578	612	1013	402	729	767	659	916	377	428	1749	1018	576	626	755	391	693	772	682	774	344	369	2006	1685	1153	1348	1512	972	930	1282	873	1789	770	1217	615	1248	1950	1080	1051	731	1026	2603	1064	1472	859	1224	1554
60	1922	1004	580	540	968	518	613	810	634	843	389	315	1798	916	512	694	717	307	430	809	737	1015	361	379	1876	1944	1131	1307	1313	1166	1315	1304	1285	1646	679	1218	761	1244	2211	1209	815	907	1138	2379	1321	1433	631	1269	1502
61	1738	1273	380	592	1008	368	728	678	732	946	390	410	1863	1112	681	699	802	343	759	731	675	935	490	315	2014	1944	1110	1152	1177	1069	1699	1362	1300	1816	966	1262	596	1440	1873	1293	915	718	1180	2423	1225	1385	1015	1208	1351
62	1870	764	471	511	891	421	512	784	667	821	447	283	1815	1079	423	570	712	375	579	789	592	967	359	357	1865	1917	1032	1337	1280	1121	1371	1240	1314	1544	851	1337	755	1286	1967	1228	899	898	1048	2279	1053	1483	783	1194	1393
63	1789	1080	386	677	1057	473	609	624	675	764	380	458	1762	864	645	752	788	553	536	677	551	880	455	367	1837	1935	1020	1287	1401	947	1415	1290	1038	1675	1010	1168	695	1085	2067	1136	769	1111	1114	2258	1168	1607	1040	1226	1465
64	1617	1059	459	427	939	367	520	697	633	888	381	293	1769	990	492	591	706	375	539	587	509	832	553	415	1919	1973	1092	1250	1145	1023	1249	1328	1044	1641	709	1347	828	1271	2008	1082	836	981	1111	2353	1040	1493	897	1364	1222
65	1801	1070	545	703	956	455	714	535	567	794	423	334	1844	919	435	668	738	258	686	698	620	884	555	400	1649	1924	1134	1131	1219	1078	1224	1480	1136	1830	599	1208	701	1395	2087	1141	934	878	1234	2168	992	1547	743	1170	1208
66	1660	1027	461	563	1006	483	846	809	644	836	332	360	1830	1136	644	792	827	445	556	638	713	912	416	244	1824	1842	1165	1346	1246	1185	1726	1579	908	1591	719	1326	751	1196	2076	1039	847	896	1031	2196	1086	1369	869	1372	1053
67	1927	885	513	569	1058	346	796	651	583	798	381	313	1811	1097	512	701	750	435	595	795	601	830	420	341	1621	1860	1206	1255	1152	1044	1320	1474	1048	1777	847	1363	593	1409	2140	1099	906	889	1222	2139	1074	1567	694	1231	1055
68	1886	1098	353	588	1110	340	779	663	756	1053	350	428	1822	923	525	610	643	421	615	736	719	851	390	330	1762	1889	1223	1307	1414	1078	1449	1437	1197	1776	752	1268	789	1327	2114	1121	1151	1036	1041	2329	1107	1540	993	1318	1081
69	1930	1056	465	511	1123	368	625	542	694	884	467	249	1856	1191	419	692	809	382	700	819	769	948	420	354	1934	1840	1163	1237	1245	1064	1401	1451	1103	1742	515	1264	681	1266	1956	1095	974	861	1206	2144	974	1430	715	1193	876
70	1934	786	474	541	1048	430	635	595	594	994	359	389	1813	976	587	680	689	423	869	620	732	1019	418	318	1749	1953	1215	1281	1349	1006	1657	1385	1046	1957	715	1200	645	1320	2085	1186	839	1093	1203	2148	1137	1398	980	1317	1091
71	1726	1238	374	482	1001	405	624	751	682	842	407	304	1667	856	418	679	697	411	581	614	616	1075	411	353	1773	1847	1188	1208	1428	1082	1644	1246	1159	1502	745	1581	766	1064	2062	1041	848	784	1155	2049	1009	1356	928	1271	1147
72	1848	1234	610	632	1110	391	599	686	751	849	339	351	1938	1066	509	638	755	464	627	684	624	1009	464	372	1848	1923	1218	1341	1296	921	1517	1281	1120	1491	883	1297	687	1253	1989	1286	861	989	1194	1936	1141	1514	885	1361	1045
73	1896	1051	511	538	1049	455	653	568	761	984	427	322	1684	820	551	750	838	387	717	526	754	924	493	283	1686	1725	1355	1170	1235	892	1227	1348	1076	1661	655	1115	828	1200	2081	1237	796	902	1237	1930	955	1501	814	1286	989
74	1788	912	619	701	1116	495	722	648	683	944	365	239	1775	900	647	697	656	486	614	832	528	900	444	313	1744	1912	983	1343	1276	923	1341	1397	1035	1837	612	1112	755	1213	1977	1118	892	857	1068	2173	1078	1372	784	1255	1007
75	1940	1200	550	522	1014	413	701	749	640	883	419	467	1943	1190	413	703	714	475	527	589	656	923	301	440	1642	1832	1174	1250	1316	1094	1414	1378	1260	1637	522	1265	798	1224	2184	1275	969	1072	1077	1997	1004	1397	948	1181	1000
76	1876	1163	522	567	960	412	621	633	634	911	363	351	1649	966	661	703	748	342	680	760	672	962	428	374	1799	1822	1265	1248	1341	1197	1301	1334	1102	1682	653	1230	669	1293	1935	1101	935	889	1057	2214	861	1472	1038	1328	1030
77	1974	1040	605	632	990	382	611	695	704	900	357	378	1821	1089	507	638	714	353	549	720	532	819	382	299	1732	1933	1109	1181	1333	1122	1544	1468	1175	1654	1075	1135	692	1350	2161	1174	976	800	1130	2062	1098	1339	914	1214	937
78	1885	1126	406	499	924	537	782	684	772	938	393	409	1729	948	668	674	793	415	641	726	670	960	351	392	1614	2057	1285	1213	1395	1253	1667	1280	1198	1538	497	1419	693	1268	1975	1177	1090	781	1061	2086	1010	1347	1091	1283	1019
79	1933	1135	638	647	956	461	738	760	751	951	464	234	1721	1040	512	625	692	495	737	857	709	884	490	460	1737	1753	1123	1276	1467	1003	1539	1557	1137	1636	864	1259	825	1408	1961	1071	792	1184	1176	1849	940	1291	777	1228	880
80	1966	1063	575	531	957	322	838	651	642	946	415	351	2003	1124	532	725	729	428	478	658	752	899	356	275	1655	1634	1251	1136	1317	1122	1297	1432	1262	1719	682	1403	672	1389	1988	1081	950	875	1195	1956	971	1411	1050	1251	985
81	1905	793	619	515	899	462	775	538	621	821	414	260	1753	1082	547	718	669	489	616	652	650	815	504	305	1541	1691	977	1188	1275	1047	1699	1467	1075	1694	972	1273	724	1317	1989	1027	920	953	1083	1974	996	1303	952	1091	789
82	1969	984	738	507	952	416	739	686	642	848	447	380	1743	1160	609	626	704	369	714	674	691	913	406	379	1935	1808	1204	1272	1320	1059	1298	1457	1064	1713	938	1327	876	1134	1984	1169	846	1069	1112	2010	1005	1331	925	1344	1073
83	1962	1116	569	559	829	356	640	619	723	762	443	440	1959	1013	641	557	705	406	661	682	554	1109	342	343	1764	1931	1224	1371	1284	1029	1458	1399	1121	1505	797	1089	713	1294	1870	1140	932	922	1087	1994	1027	1296	1029	1202	817
84	1924	1133	531	421	725	512	599	608	666	907	421	175	1771	1118	638	655	764	417	658	649	677	938	350	318	1815	1883	1179	1234	1348	1046	1194	1292	1082	1776	863	1112	755	1353	1958	1153	974	849	1152	1806	901	1154	1029	1129	884
85	1868	1146	585	615	777	387	632	766	834	957	512	401	1886	758	648	656	729	413	689	715	659	859	489	404	1720	1831	1174	1214	1300	1215	1841	1525	1184	1676	1020	1246	804	1323	1657	1290	900	1000	1115	1921	883	1133	908	1327	919
86	1993	1160	443	642	798	362	507	707	549	904	439	359	1897	1110	338	672	708	416	563	621	706	951	419	371	1921	1798	1036	1235	1445	1110	1720	1401	1312	1555	649	1345	694	1355	1995	1107	881	876	1095	1930	933	1147	792	1254	883
87	2097	1036	602	593	626	333	609	631	667	779	272	317	2029	1099	529	623	777	490	577	699	656	979	354	340	1576	1765	1229	1380	1123	1223	1151	1367	1253	2008	1002	1115	811	976	1972	1185	872	935	1154	1816	998	1117	986	1247	761
88	2094	913	407	623	724	331	778	727	627	776	278	295	1791	1014	457	599	702	430	633	773	713	836	427	294	1827	1983	1160	1305	1339	974	1581	1424	1087	1596	689	1239	704	1176	2084	1171	837	916	1173	1825	940	1330	874	1304	818
89	1949	1109	472	699	651	523	731	613	757	836	230	365	1849	953	299	614	566	397	560	654	706	830	302	250	1876	1820	1178	1238	1538	1101	1567	1475	993	1714	847	1240	601	1262	2069	1052	1087	895	1045	1869	740	1329	943	1241	912
90	2025	1088	550	580	731	434	635	545	699	757	386	343	2080	1101	465	543	785	403	720	815	711	984	510	339	1530	2028	1186	1360	1148	1013	1606	1438	983	1785	947	1239	692	1484	1891	1013	789	959	1323	1762	852	1268	821	1145	792
91	1822	1243	434	520	674	556	772	678	523	783	416	373	1848	1162	453	644	694	389	469	706	618	814	409	325	1752	1862	1159	1205	1220	1135	1684	1441	1234	1605	1094	1235	724	1113	1998	1186	911	1110	1269	1889	896	1245	816	1421	879
92	1951	1017	415	437	810	422	726	785	668	812	466	454	1789	1055	620	634	638	325	674	682	741	869	374	368	1655	1820	1248	1199	1192	951	1732	1400	1027	1625	947	1236	608	1306	1882	1077	735	967	1168	1850	1168	1269	867	1194	816
93	1646	956	640	434	768	467	824	705	666	965	338	240	1765	1089	556	701	500	419	487	650	739	944	422	366	1713	1853	1327	1208	1251	1076	1743	1559	1174	1585	782	1265	778	1266	1793	1235	723	816	1174	1821	741	1365	1000	1085	965
94	2016	1026	506	540	750	416	846	671	829	820	265	334	1964	1016	461	588	874	515	713	685	618	887	366	306	1790	1757	958	1051	1383	1015	1260	1369	1262	1846	793	1249	697	1322	1703	1082	941	1099	1247	2065	1081	1319	931	1269	833
95	1936	1150	445	559	781	403	693	616	746	846	433	288	1876	1060	570	613	734	606	739	712	732	955	416	478	1642	1851	1137	1301	1137	893	1610	1350	1141	1547	564	1343	744	1299	1721	1319	1091	780	1201	1881	908	1148	943	1028	1000
96	2029	1141	538	529	711	435	885	718	737	790	390	313	1745	1077	518	637	683	456	580	723	617	965	375	352	1723	1964	960	1239	1257	946	1635	1455	1065	1632	733	1379	660	1276	1896	1257	915	1070	1134	1780	994	1101	828	1243	865
97	1983	1051	644	686	646	397	831	648	571	808	311	382	1772	935	526	740	732	449	631	694	596	1007	378	291	1660	1899	1013	1363	1261	955	1490	1428	1155	1717	659	1313	694	1166	1568	1098	922	874	1160	1403	959	1433	937	1169	796
98	1673	1003	464	462	805	433	768	667	663	931	332	412	1792	1123	619	607	767	352	420	751	716	977	380	370	1677	1823	1223	1332	1281	1033	1609	1453	1077	1654	914	1308	748	1312	1768	1117	1001	883	1163	1775	848	1143	824	1079	779
99	1909	994	410	513	758	524	811	621	700	952	451	255	1776	1153	642	707	761	448	573	678	679	1032	402	355	1898	1844	1103	1105	1292	1157	1536	1283	1188	1673	835	1283	714	1357	1810	1106	928	1029	1143	2051	857	1299	1149	1283	773
100	1923	1057	343	570	726	485	827	684	546	1026	440	486	1594	1093	438	584	671	398	848	643	715	997	380	344	1687	1717	1269	1333	1167	1039	1213	1297	1227	1457	637	1206	730	1363	1882	1238	908	1012	1111	2042	868	1104	808	1234	687
101	1918	1108	677	592	785	412	708	519	555	763	277	352	1657	1069	528	576	646	386	577	636	785	831	471	332	1838	1895	1263	1219	1181	1115	1607	1400	1064	1770	667	1291	696	1268	1783	1014	909	981	1169	1897	855	1209	855	1252	918
102	1906	1155	552	533	818	364	720	775	759	850	286	413	1754	1026	626	680	792	389	589	817	610	937	342	350	1634	1872	1113	1243	1321	1173	1513	1420	1119	1662	581	1307	600	1267	1682	1112	948	923	1260	1882	903	1386	1041	1213	755
103	2039	779	603	716	748	383	799	660	656	767	335	267	1909	918	408	692	719	422	699	680	704	897	417	360	1546	1841	1122	1340	1275	1243	1509	1406	1111	1599	777	1230	755	1216	1857	1195	868	935	1196	1531	886	1441	883	1225	894
104	1833	1064	247	656	646	362	709	626	684	968	351	343	1543	1124	521	593	709	411	664	763	623	914	388	231	1714	1710	1254	1382	1352	1140	1105	1408	1451	1581	899	1320	516	1407	1792	1044	787	804	1081	1837	1047	1251	819	1206	804
105	1727	1057	458	550	697	288	780	564	766	851	289	337	1804	871	567	494	686	429	491	806	690	869	467	377	1699	1932	980	1371	1408	1085	1440	1493	1086	1628	1015	1301	722	1129	1762	1367	825	1153	1204	1955	856	1282	956	1420	812
106	2054	990	455	629	845	416	759	618	688	895	411	399	1888	862	495	612	705	440	693	653	796	849	447	376	1698	1703	1252	1255	1379	1300	1204	1348	1202	1867	732	1236	838	1239	1714	1090	878	895	1270	1842	866	1102	1026	1212	750
107	1771	1054	440	669	747	515	830	641	566	881	324	246	1925	1081	463	649	779	366	714	640	679	1041	461	299	1674	1729	1042	1237	1336	974	1113	1318	1097	1680	654	1129	610	1378	1987	1210	826	838	1210	1700	891	1290	806	1158	1071
108	1976	1216	435	678	676	505	761	622	567	883	274	412	1683	1042	526	640	663	438	522	677	666	766	448	335	1748	1638	1397	1229	1353	1023	1142	1357	1179	1520	699	1315	722	1436	1992	1279	757	909	1001	1838	945	1162	950	1118	834
109	1945	947	604	689	741	307	726	564	666	824	472	225	1876	1087	633	660	728	412	740	693	602	930	260	412	1846	1975	1264	1280	1254	1187	1233	1477	1087	1674	700	1331	719	1307	1941	1154	965	1088	1152	1690	876	1167	939	1172	681
110	2131	1182	469	732	805	339	766	803	769	905	346	322	1832	939	567	681	708	559	711	551	683	917	342	362	1749	1983	958	1214	1200	1128	1357	1714	1096	1813	1165	1163	693	1312	1854	999	879	843	1181	1990	1027	1282	837	1336	773
111	2083	1282	470	585	836	451	837	825	1173	923	574	318	1700	998	566	643	667	329	659	640	607	992	269	344	1713	1880	1260	1441	1389	1505	1447	1762	1132	1792	546	1321	792	1378	2006	1174	988	1084	1107	1872	803	1394	821	1202	818
112	2235	1786	545	699	619	295	906	1015	1158	1088	353	336	1806	1057	673	644	700	406	626	838	694	916	579	381	1728	1928	1279	1603	1423	1831	1217	2205	1448	1669	711	1311	658	1323	1992	1151	943	963	1109	1751	915	1234	984	1240	718
113	2303	2021	510	698	818	513	785	1142	1287	1009	416	327	2010	925	483	677	726	486	555	755	748	934	404	319	1678	1867	1292	1982	1408	2368	1330	2876	1327	1510	743	1073	642	1274	1963	1295	1075	861	1254	1902	1044	1260	817	1049	878
114	2272	1943	574	688	704	410	782	1247	1356	1209	515	437	1795	948	584	732	682	470	645	840	899	947	458	444	1872	1851	1299	2228	1408	2573	1645	3203	1422	1589	925	1328	729	1531	2051	1746	880	886	1122	1828	875	1221	874	1141	930
115	2490	1699	328	749	654	376	775	1212	1483	1485	539	713	1789	1040	696	754	918	276	778	985	1276	1056	403	372	1954	1843	1396	2724	1582	2632	2477	3285	1738	1656	722	1329	826	1556	1956	2431	920	1127	1177	1475	811	1115	733	1133	890
116	2505	2090	406	828	639	603	878	1188	1288	1585	515	717	1743	1172	526	609	721	419	790	1176	1509	1306	549	400	2416	1903	1673	2778	1645	2625	2481	3273	1929	1603	702	1370	787	1896	1826	2442	933	1032	1166	1769	777	1409	1011	1250	1027
117	2224	1779	419	825	686	801	794	1207	1246	1741	515	815	1677	1171	571	762	620	412	928	960	1353	1405	826	327	3428	1764	1842	2707	1729	2633	2523	3249	2058	1544	536	1406	799	1748	1960	2586	923	1061	1066	1790	995	1313	1164	1310	1241
118	2446	1918	817	983	758	798	1001	1191	1427	1664	593	860	1769	1054	671	851	707	502	862	1151	1504	1421	826	379	3778	1878	2474	2898	1707	2600	2531	3370	2106	1676	996	1705	1141	1787	2071	2754	897	778	1247	2049	974	1257	1081	1244	1648
119	2494	1886	877	956	670	670	937	1356	1506	1633	651	884	1791	975	595	930	700	489	913	1278	1373	1613	845	478	3981	1682	2917	2893	1769	2632	1938	3225	2471	1640	662	1744	1468	2264	1852	2782	930	758	1084	1935	810	1482	1049	1235	2051
120	2290	1808	1275	1060	688	890	998	1320	1489	1805	744	791	1936	1156	579	889	689	574	969	1329	1410	1611	768	491	3310	1739	2813	2669	1666	2638	2117	3174	2317	1720	808	1982	1464	1854	1944	2903	1010	1240	1482	1825	1078	1303	946	1109	2095
121	2486	2045	1391	944	745	942	1127	1243	1447	1608	651	654	1759	1032	643	1071	616	791	971	1422	1517	1473	637	632	3855	1812	2551	2977	1584	2755	2509	3417	2250	1600	952	1910	1535	1976	1905	2691	1050	737	1712	1846	928	1330	996	1213	1950
122	2462	2093	1223	899	693	927	1052	1117	1436	1590	754	717	1709	1455	877	1015	759	807	995	1363	1505	1374	783	704	3750	1820	2878	2958	1702	2599	1878	3248	2357	1577	879	2137	1431	1876	2012	2896	1017	826	1891	1847	1034	1264	1377	1207	1970
123	2249	2107	1481	1020	762	806	1197	1276	1421	1741	547	689	1836	1646	718	999	652	883	1042	1392	1300	1611	788	688	4108	2164	2811	2993	1659	2806	2077	2909	2362	1608	1243	2293	1582	2145	2021	2898	870	790	2296	1909	923	1290	1829	1207	1986
124	2411	1951	1455	1038	674	867	1152	1225	1429	1659	1014	635	1752	1663	747	1017	727	848	1133	1361	1486	1569	940	668	3982	2493	2366	1842	1599	2746	2090	3318	2347	1698	1418	2236	1686	1661	2044	2734	1044	1407	2484	1750	915	1383	1539	1426	1945
125	2398	1789	1376	964	793	801	1069	1338	1503	1619	1043	632	1742	1618	849	989	694	716	1116	1334	1509	1451	944	639	4116	2616	2702	2980	1691	2634	2051	3076	2164	1736	1380	2409	1700	2198	1811	2743	1288	730	2455	1731	921	1257	801	1570	1943
126	2505	1903	1223	916	639	785	1153	1166	1431	1671	524	723	1747	1484	788	1017	706	716	1006	1336	1305	1298	951	737	3961	2596	2146	1861	1534	2631	2590	3331	2263	1650	1404	2358	1777	2041	2128	2988	1330	703	2413	1854	984	1255	982	1737	2008
127	2453	2038	1387	924	687	938	1274	1186	1399	1652	656	666	1862	1722	766	1041	648	742	1275	1226	1436	1377	930	571	3836	2820	2560	2834	1522	2766	2733	3054	2211	1946	1438	2269	1861	2325	1926	2952	1336	731	2520	1834	941	1333	956	1722	1841
128	2400	2061	1317	979	737	851	1190	1253	1548	1613	607	645	1794	1721	768	1177	759	865	1191	1318	1397	1447	829	650	4031	2571	2235	3042	1729	3053	2551	3053	2204	2120	1836	2478	1672	1926	2121	2945	1427	889	2319	1855	885	1335	1171	1554	2052
129	2432	2078	1460	802	682	806	1118	1222	1448	1843	597	555	1687	1765	714	1078	703	763	1172	1181	1601	1394	798	676	3816	2771	2673	2814	1595	2677	1992	3311	2222	1919	1441	2505	1815	2092	1792	2805	1182	713	2179	1880	906	1284	981	1703	2098
130	2402	1982	1576	755	781	830	1175	1099	1480	1814	976	526	1958	1847	605	1126	632	771	1173	1150	1448	1283	955	603	3769	2742	2375	1757	1722	2781	1905	3253	2129	2012	1523	2447	1739	2315	1940	2937	1380	744	2221	1953	973	1192	889	1798	2059
131	2487	2043	1250	898	790	1014	1144	1151	1358	1889	777	631	1875	1491	712	1186	762	879	1096	1223	1518	1449	944	533	3904	2827	2519	2715	1628	2730	2116	3006	2167	2154	1371	2362	1671	2016	2148	2794	1294	826	2595	1814	880	1370	1117	1517	2025
132	2398	2079	1617	943	625	991	1152	1154	1409	1816	663	553	1962	1617	812	1118	748	746	1116	1273	1437	1444	995	616	4091	2507	2038	3014	1897	2671	2003	3407	2340	2141	1471	2569	1848	2061	2203	2796	1329	777	2209	1776	961	1299	995	1671	1935
133	2301	1825	1349	963	805	917	1189	1214	1287	1790	951	661	1750	1708	712	1142	697	793	1104	1292	1435	1284	888	547	3479	2597	2439	2030	1685	2716	2497	3239	2400	2107	1883	2475	1770	1996	1586	2935	1382	867	2232	2014	1015	1248	725	1512	1976
134	2417	1769	1345	905	764	885	1188	1183	1539	1789	539	592	1990	1580	690	1146	695	845	1116	1170	1516	1332	831	583	3859	2561	2154	2397	1585	2589	2599	3189	2126	2143	1518	2265	1741	1743	1884	2914	1507	1235	2246	2420	927	1445	902	1722	2157
135	2356	1877	1460	851	726	833	1157	1156	1251	1575	931	561	1910	1619	841	1066	778	968	1027	1316	1482	1404	855	517	3678	2513	2420	2884	1614	2606	1903	3077	2050	2182	1411	2052	1915	1993	1798	2721	1370	890	2131	2811	905	1303	1058	1394	2123
136	2416	1817	1419	854	693	756	1244	1226	1305	1734	612	549	2129	1752	692	1276	754	747	1074	1098	1323	1522	879	570	3770	2291	1901	2750	1697	2730	1987	3213	2182	2135	1611	2301	1638	1849	1775	2940	1338	828	2229	3152	836	1254	1273	1438	2037
137	2523	2024	1381	758	638	875	1289	1143	1408	1453	468	543	1827	1523	743	957	747	765	1079	1298	1462	1524	879	481	3204	2418	2143	1784	1555	2889	2361	3037	2029	2210	1509	2422	1636	1763	1972	2691	1265	816	2194	2970	810	1336	900	1583	1992
138	2261	1920	1513	859	606	738	1204	1149	1358	1755	643	536	1764	1514	784	1138	639	869	1092	1144	1506	1358	722	486	3850	2131	1871	2556	1574	2989	1869	3018	2073	2300	1874	2279	1773	1999	1644	2830	1410	736	1942	3097	1046	1308	1022	1674	2099
139	2355	1846	1367	791	634	898	1270	1112	1512	1675	920	497	1680	1896	653	1065	656	818	1004	1255	1366	1292	729	537	3734	2544	2001	2621	1742	2863	1746	3090	1996	2274	1348	2486	1831	2045	1976	2646	1312	758	2368	2941	932	1312	989	1551	1989
140	2295	1814	1526	663	801	780	1074	1067	1228	1638	530	437	1866	1603	563	946	777	688	1098	1171	1470	1315	791	520	3553	2226	1754	2802	1579	2892	2270	3105	2178	2175	1436	2470	1638	2020	2211	2721	1544	1261	2133	2845	1102	1435	884	1431	1788
141	2282	2143	1517	732	650	972	1171	1255	1476	1740	564	392	1814	1665	698	1121	797	809	977	1160	1359	1382	790	404	3540	2410	1840	2937	1532	2708	2323	3167	2031	2124	1477	2446	1616	1809	2157	2664	1365	679	2245	3022	850	1428	816	1561	1848
142	2324	1830	1432	753	489	791	1355	1056	1095	1581	707	424	1780	1755	618	1008	797	894	1067	1278	1474	1239	775	511	3716	2054	1583	2637	1363	2582	2488	3311	2114	2092	1603	2285	1789	1859	2120	2718	1298	732	2117	2834	1080	1303	975	1514	1865
143	2047	1996	1542	882	761	813	1145	1164	1496	1628	784	469	1730	1704	719	1040	748	767	1081	1030	1376	1450	841	478	3570	2251	1615	2733	1649	2648	2469	3264	2344	2106	1570	2334	1743	1992	1745	2648	1303	1339	2151	2930	933	1233	862	1601	2047
144	2198	1917	1445	708	601	703	1198	1035	1395	1331	484	566	1717	1564	562	998	760	816	1017	1069	1380	1333	689	525	3632	1969	1916	2927	1471	2643	2468	3187	2165	2296	2039	2328	1867	2241	1419	2846	1331	1348	2136	3088	873	1311	851	1474	1835
145	2227	1836	1630	719	712	852	1303	1133	1294	1385	698	382	1753	1705	676	861	711	726	917	1202	1313	1380	912	489	3223	2095	1758	2703	1458	2629	2435	2878	2220	2130	1397	2424	1857	1994	1819	2842	1396	785	2048	2863	812	1296	880	1301	1957
146	2181	1971	1437	685	701	825	1177	1128	1380	1519	500	404	1798	1620	624	979	719	827	928	1150	1198	1322	741	373	3314	2356	1710	3094	1573	2765	1758	3119	2133	2259	1574	2540	1649	1805	1743	2625	1358	1268	2075	2926	975	1385	1251	1487	1859
147	2138	1755	1616	649	672	784	1161	1159	1430	1607	565	467	1923	1699	620	1123	829	745	1121	1281	1265	1270	624	443	3286	2174	1601	2699	1450	2805	2368	3183	2198	2251	1704	2488	1802	1789	1796	2617	1241	1427	1871	3010	1070	1196	1479	1368	1829
148	2196	1816	1292	806	672	814	1153	1080	1271	1543	629	339	1873	1664	759	930	760	841	946	1237	1332	1355	692	329	3194	2094	1461	2676	1403	2826	1730	3152	2109	2147	1759	2443	1595	2335	1699	2664	1376	794	1986	2949	932	1365	846	1604	1707
149	2035	1964	1555	739	688	848	1074	1176	1349	1573	411	404	1789	1840	675	945	686	718	785	1305	1371	1359	696	413	3311	2192	1658	2771	1533	2709	2365	3162	1937	2295	1687	2265	1687	1569	1702	2520	1327	1278	2090	2903	969	1412	1540	1431	1702
150	2151	1830	1536	816	718	892	1163	1065	1385	1646	723	426	1688	1481	659	1102	681	721	946	1042	1222	1173	722	438	3037	2037	1632	2591	1545	2750	1551	3120	2182	1943	1654	2224	1593	1938	2053	2707	1327	829	1845	3001	970	1341	1550	1487	1608
151	2176	2027	1606	590	573	808	1222	1037	1321	1635	765	437	1704	1520	508	1052	672	760	974	1052	1167	1242	607	316	3245	2113	1768	2556	1638	2769	1611	3476	2295	2209	1609	2474	1806	1633	1800	2658	1199	1148	1863	2761	896	1317	1399	1390	1626
152	2210	1903	1439	696	752	855	1255	1028	1364	1450	727	336	1724	1745	594	960	656	628	904	1103	1271	1046	643	358	3164	2153	1677	2604	1602	3031	2053	3213	2315	2049	1879	2318	1869	1826	2139	2606	1303	853	1934	2823	922	1516	1262	1354	1588
153	2092	1966	1494	697	609	874	1023	904	1512	1550	523	417	1781	1533	687	1146	666	719	876	1068	1134	1365	777	353	3158	2079	1539	2479	1556	3049	1671	2921	1997	2237	1662	2247	1751	1795	2015	2426	1113	1234	1740	2933	913	1321	1198	1554	1634
154	2125	2001	1498	775	554	772	1157	921	1324	1506	771	417	1724	1678	683	1125	749	665	950	993	1113	1169	606	427	3074	1879	1761	2735	1527	2742	2107	2922	2278	2200	1484	2350	1667	1866	1812	2471	1232	1215	1737	3006	918	1427	1186	1481	1714
155	2052	1760	1436	661	727	865	1140	973	1286	1491	419	360	1807	1444	537	1079	676	643	684	1035	1168	1092	718	380	3226	2164	1430	2796	1511	2893	2190	2866	1923	1972	669	2532	1688	1843	1481	2697	1267	1800	1648	2599	900	1274	1188	1305	1534
156	2048	2060	1287	776	691	832	952	1035	1312	1556	419	381	1742	1587	629	986	735	644	813	1175	1250	1069	610	320	3091	2201	1432	2533	1560	2766	1541	3000	2156	2257	1803	2290	1618	1875	1401	2660	1128	1753	1697	2585	945	1468	1130	1515	1578
157	2201	1992	1151	687	631	752	1028	953	1363	1530	605	370	1725	1514	534	928	729	609	941	1088	1106	1315	775	350	3059	2006	1685	2595	1519	2730	2250	2969	2087	2198	1591	2337	1798	2017	1547	2392	971	1478	1957	2821	864	1285	1023	1480	1465
158	2096	1945	1214	603	681	755	1097	1109	1318	1543	408	246	1710	1531	635	1009	765	592	835	1215	1200	1217	658	431	3167	1995	1232	2862	1500	2841	1957	2895	1961	2268	1764	2292	1567	1815	1882	2640	1133	858	1741	2829	917	1415	1527	1288	1313
159	2033	1936	1059	679	699	806	1045	1048	1390	1428	740	343	1874	1693	565	1117	709	509	940	1098	1003	1135	655	372	3264	2202	1536	2779	1684	2785	2226	2887	2160	2165	1817	2251	1624	1657	1710	2424	1188	692	1686	3104	972	1486	1082	1431	1477
160	2107	1832	1176	779	586	665	1067	1062	1351	1435	590	362	1650	1397	561	961	674	540	795	1064	1139	1096	695	410	3182	2132	1269	2677	1521	2996	2025	2693	2154	2119	1525	2243	1571	2013	1738	2448	1033	836	1550	2849	890	1362	1266	1352	1400
161	2076	1914	1082	656	694	744	1138	946	1164	1594	485	390	1761	1294	620	1009	617	536	826	1049	1307	1217	640	329	2993	2034	1528	2706	1646	2801	1524	2709	2041	2016	1618	2282	1798	1802	1858	2427	1223	792	1790	2897	882	1458	1124	1482	1322
162	2212	1923	1268	698	610	636	1058	833	1228	1571	673	259	1687	1353	479	1049	679	547	802	1060	1256	1279	608	397	3105	2020	1408	2601	1552	2811	2169	2818	2015	2257	1463	2496	1695	1471	1858	2735	995	821	1633	2825	1180	1587	903	1450	1473
163	1877	1843	1310	653	768	730	1140	955	1145	1555	477	431	1900	1289	636	1007	704	622	830	873	1087	1281	640	306	3243	1979	1263	2710	1600	2637	1960	2867	2062	2131	1409	2359	1692	1815	1648	2452	1239	942	1449	2759	943	1355	1267	1312	1328
164	2161	1774	1367	717	531	730	1008	870	1139	1544	543	315	2035	1475	634	1020	678	619	670	940	1185	1136	539	399	3108	2129	1443	2561	1446	2686	1904	3144	2078	2112	1353	2137	1757	1661	1640	2411	1152	872	1720	2775	1045	1408	1252	1239	1337
165	2144	1731	1302	791	726	643	994	885	1228	1612	631	287	1882	1429	619	829	694	623	551	1105	1137	1200	404	439	2989	2155	1416	2770	1661	2782	1876	2966	1992	2296	1528	2218	1697	1932	1790	2414	993	631	1475	2704	930	1440	1063	1334	1380
166	2121	1762	1093	721	576	734	1046	783	1250	1464	540	309	2152	1179	508	919	651	528	782	1081	1042	996	547	327	3080	2106	1446	2768	1524	2632	1958	3150	1999	2134	1338	2191	1745	1710	1664	2549	1066	704	1471	2570	929	1622	1408	1274	1334
167	2000	1693	1052	677	606	732	930	779	1275	1534	550	409	1821	1273	447	901	687	474	751	1049	941	1271	651	393	2805	2203	1549	2696	1468	2853	1945	2934	2054	2069	1370	2220	1770	1737	1823	2370	1162	573	1488	2841	858	1575	1321	1145	1223
168	1944	1712	1239	621	634	651	963	818	1094	1533	678	390	1781	1293	624	914	654	644	845	998	1221	1383	573	413	2795	2149	1429	2589	1656	2872	2022	2994	1956	2347	1500	2214	1830	1520	1672	2325	1076	708	1729	2570	905	1457	933	1291	1398
169	2151	1696	1236	629	726	595	973	986	1106	1501	500	368	2111	1305	596	890	716	498	875	975	1077	1247	610	379	2915	2362	1416	2512	1540	2620	1983	2750	2003	2091	1298	1973	1556	1614	1606	2274	1168	687	1467	2533	869	1443	1034	1326	1204
170	1898	1652	1255	642	706	597	886	872	1037	1359	549	348	1871	1374	467	905	724	522	823	981	1054	1137	624	370	2704	2215	1280	2445	1391	2715	1960	2898	1969	1989	1260	2114	1522	1802	1841	2191	1042	835	1470	2500	939	1417	941	1417	1274
171	1959	1669	1197	658	678	725	1062	847	1138	1309	312	382	1654	1195	570	816	712	520	831	1020	990	1195	622	432	2874	2346	1274	2380	1675	2570	1873	2917	1992	2099	1387	2163	1456	1750	1530	2190	993	1271	1265	2527	1048	1617	1194	1154	1288
172	1807	1781	1213	664	739	613	956	1032	1113	1359	645	351	1823	1172	456	1000	689	482	897	963	1041	1152	649	309	2799	2303	1207	2461	1518	2613	1740	2805	2086	2146	1372	2291	1726	1572	1628	2097	1001	780	1395	2519	1031	1270	979	1338	1278
173	1917	1769	837	698	695	715	913	856	987	1278	587	363	1816	1283	558	878	773	520	679	943	1095	1077	538	392	2971	2072	1429	2440	1248	2431	1756	2585	2028	2146	1069	2288	1579	1825	1637	2088	897	1229	1523	2481	913	1450	1210	1387	1321
174	1969	1393	957	779	597	609	809	783	1260	1332	454	315	1720	1263	499	854	906	584	560	856	1112	1008	581	388	2762	2045	1362	2461	1390	2524	1385	2703	1779	1974	1162	1834	1595	1881	1686	2116	1070	791	1583	2519	824	1543	954	1298	1267
175	2023	1704	1151	793	728	554	922	836	1127	1254	545	257	1827	1373	534	1030	830	408	869	759	1089	1188	566	412	2601	2031	1249	2364	1541	2555	1804	2480	1993	2154	1239	1823	1500	1793	1971	1973	1031	821	1451	2337	894	1342	983	1456	1185
176	2053	1677	776	581	788	525	799	837	1043	1259	608	369	1748	1256	521	933	825	395	670	872	939	1325	536	289	2427	2112	1224	2454	1347	2597	1280	2505	1827	2098	1386	2095	1209	1613	1803	2059	1195	1240	1325	2356	955	1575	967	1307	1245
177	1992	1740	952	602	699	714	777	747	949	1268	485	297	1757	1212	527	1091	944	506	724	999	1034	1471	577	346	2583	2190	1169	2263	1424	2471	1645	2254	1707	2133	921	2039	1351	1595	1580	1960	980	1921	1299	2171	941	1542	1148	1331	1062
178	2023	1618	1151	689	667	512	862	777	998	1103	325	246	1807	1112	549	1049	937	552	700	896	1132	1276	577	314	2519	1884	1061	2181	1429	2624	1167	2542	1797	2050	1223	2042	1356	1472	1852	2003	995	1776	1289	2240	1004	1546	778	1348	1024
179	1977	1646	947	670	874	614	926	855	959	1399	452	253	1751	1183	649	1155	981	461	759	819	1046	1343	584	309	2434	1967	1212	2051	1424	2636	1677	2502	1685	2044	1038	1948	1327	1488	1600	2154	853	1826	1511	2168	985	1519	937	1273	1077
180	1932	1618	950	698	658	546	867	704	964	1351	533	397	1921	1388	541	1066	857	493	681	863	933	1230	645	401	2585	1923	1228	1987	1600	2710	1495	2465	1648	2197	1196	1838	1380	1622	1424	1845	947	1922	1397	2222	883	1552	1203	1342	994
181	1870	1763	1171	712	807	517	915	733	808	1293	523	500	1658	1339	469	1004	947	597	685	714	906	1213	619	464	2467	2072	1360	1937	1401	2831	1749	2645	1608	2103	1136	2157	1312	1522	1731	1759	983	1923	1385	2073	877	1511	945	1274	1056
182	1890	1789	1021	781	804	468	867	826	926	1376	646	334	2106	1254	608	978	900	367	705	1026	979	1266	394	370	2541	1975	1263	2052	1432	2759	1801	2227	1764	2038	1041	2041	1323	1539	1354	1821	951	1437	1311	2085	828	1496	827	1335	1087
183	2037	1600	959	670	873	608	807	815	966	1248	484	318	2053	1141	568	871	886	463	742	869	969	1336	477	266	2500	1937	1428	2077	1419	2835	1816	2340	1546	2281	1116	2004	1243	1499	1347	1723	1082	1273	1303	2053	937	1542	1045	1170	1074
184	2006	1833	1041	609	967	536	719	698	859	1124	489	371	1710	1219	561	983	1079	472	802	823	882	1712	523	316	2315	1938	1285	2035	1513	2580	1470	2247	1625	2114	905	2028	1321	1500	1602	1772	907	1215	1304	2139	797	1582	972	1115	1012
185	1839	1901	973	779	902	462	1012	657	946	1244	399	320	1788	1452	586	935	936	425	766	817	968	1503	554	324	2208	2011	1318	1758	1488	2501	1582	2271	1556	2289	1181	2041	1306	1466	1716	1687	973	1812	1282	1763	1005	1700	977	1309	1022
186	1739	1618	1099	584	918	519	843	780	856	1262	314	435	2011	1256	260	905	894	428	749	659	998	1546	505	366	2095	1979	1489	1684	1657	2529	1341	2259	1645	1949	887	2126	1118	1389	1342	1630	952	1788	1112	2004	1026	1405	919	1450	907
187	2034	1437	1120	666	1052	459	820	783	900	1403	440	389	1874	1257	747	784	896	450	568	755	1002	1403	432	312	2246	2042	1293	1953	1579	2483	1335	2153	1726	1982	996	1949	1321	1640	1632	1566	1036	1721	1226	1851	940	1467	884	1232	980
188	1982	1586	1276	678	886	522	786	782	851	1082	562	395	1875	1201	551	978	883	491	831	879	996	1613	484	473	2073	1931	1582	1643	1425	2231	1754	1895	1641	2158	1172	1926	1301	1454	1504	1721	858	1136	1313	1782	915	1588	976	1291	1105
189	1677	1579	1365	716	813	538	848	788	836	1289	579	449	1702	1533	439	907	856	498	766	841	872	1462	547	432	2079	1760	1486	1703	1629	2416	1325	2182	1793	2039	1031	2204	1153	1642	1565	1573	966	1222	1197	2098	1046	1433	1083	1320	961
190	1990	1568	1321	619	1080	463	875	713	885	1274	473	476	1837	1318	719	915	801	467	719	760	1051	1345	634	344	1903	2009	1197	1740	1547	2469	1200	2024	1717	1993	1339	2003	1133	1551	1695	1594	1082	1504	1204	1996	990	1620	880	1281	911
191	1839	1595	1355	652	895	376	714	746	777	1158	463	307	1583	1434	620	866	842	433	718	785	910	1428	389	331	1911	1902	1285	1662	1441	2128	1556	1986	1789	2075	882	2001	1213	1349	1477	1665	1077	1165	1346	1857	927	1507	773	1305	1197
192	1825	1392	1140	589	1042	424	876	799	943	1304	460	314	1986	1330	540	905	807	366	548	849	1012	1499	517	450	1981	1807	1348	1596	1496	2300	1148	1999	1542	2072	1318	2079	1154	1434	1513	1449	886	1266	1259	1760	868	1642	820	1364	867
193	1816	1643	1170	718	944	453	727	742	774	1342	417	407	1758	1314	641	786	867	577	742	827	973	1379	518	419	1939	1779	1516	1646	1413	2386	1181	1905	1612	1927	1232	2107	995	1347	1602	1604	843	1131	1415	1765	857	1573	959	1190	954
194	1822	1540	1138	690	773	582	825	767	757	1381	593	383	1788	1175	719	837	828	419	657	916	904	1498	510	302	2174	1906	1323	1607	1516	2610	1495	1840	1505	1964	1181	2085	1145	1440	1438	1593	996	1531	1060	1759	919	1545	935	1412	933
195	1920	1571	1152	792	910	556	753	734	836	1330	507	386	1869	1255	551	940	812	469	583	748	850	1322	549	415	1953	1883	1377	1518	1460	2365	1669	1793	1503	2263	1629	1862	959	1403	1711	1567	970	1339	1167	1767	922	1555	842	1292	893
196	1865	1608	1080	802	937	512	865	681	759	1226	443	390	1779	1329	473	896	942	362	783	786	995	1338	417	350	1945	1728	1341	1507	1376	2272	1412	1749	1372	2172	1202	1962	1018	1380	1546	1516	922	1094	1145	1662	957	1464	817	1364	938
197	1927	1648	1050	736	911	524	699	739	762	1381	582	317	1881	1413	547	768	794	459	835	864	798	1423	560	284	1873	1730	1753	1772	1402	2182	1605	1816	1639	2004	1551	2157	1163	1388	1486	1692	809	1392	1217	1919	925	1433	1053	1520	1039
198	1940	1518	1114	701	786	499	812	723	805	1251	627	388	1876	1478	486	775	885	403	663	862	966	1171	508	248	1983	1832	1716	1652	1430	2429	1790	2068	1481	1964	1438	1932	1150	1324	1657	1429	902	1097	1187	1952	848	1565	878	1258	1007
199	1939	1448	1202	746	849	408	705	794	804	1253	432	278	1979	1313	349	821	872	249	877	681	847	1325	408	428	2171	1935	2193	1619	1503	2270	1605	1787	1499	2074	1278	1909	1186	1250	1718	1513	979	1341	1123	1787	1016	1363	864	1289	886
200	1916	1473	1152	573	839	493	737	711	575	1175	599	396	1721	1292	537	780	747	452	676	718	893	1075	522	367	1754	1935	2096	1431	1499	2063	1335	1738	1549	2139	1168	1807	987	1366	1595	1565	988	1380	1142	1858	923	1546	683	1098	914
201	1920	1386	1026	679	836	482	748	747	762	1176	456	280	1882	1154	605	820	943	233	656	793	1011	1103	403	319	1872	1931	1731	1517	1441	1952	1381	1816	1381	2009	1158	1687	1087	1280	1457	1527	895	1236	1217	1751	1001	1519	1035	1380	828
202	1809	1385	984	840	688	387	747	634	798	1173	549	254	1790	1118	519	887	964	420	511	701	882	1220	497	322	1897	1998	1638	1391	1394	2067	1311	1774	1558	1905	1117	1840	1018	1440	1484	1668	936	1238	1164	1806	954	1596	810	1408	888
203	1890	1524	1129	614	761	535	830	720	804	1232	580	414	1981	1378	457	727	867	384	680	653	806	1302	545	355	2158	1887	1669	1626	1600	2014	1646	1718	1615	1956	1423	1831	1239	1493	1648	1420	918	1015	1160	1868	918	1530	929	1259	936
204	2065	1375	994	667	823	471	655	695	716	1151	552	337	1683	1375	351	706	896	375	669	639	985	1113	529	325	1921	1938	1905	1383	1133	1987	1534	1781	1421	2079	1301	1861	908	1345	1676	1581	971	747	1227	1774	1008	1592	1036	1376	976
205	1890	1336	888	653	832	320	624	672	579	1144	406	393	1856	1389	606	845	920	392	532	617	861	1087	528	364	1818	1830	1920	1439	1431	2009	1093	1836	1472	2036	1482	1461	931	1377	1377	1302	863	817	1229	1784	948	1467	934	1483	1019
206	1905	1394	926	704	681	388	812	738	670	1258	514	409	1639	1331	319	831	856	350	650	703	788	1128	532	363	1808	1953	1955	1348	1579	1952	1599	1676	1488	2006	1275	1629	1047	1307	1495	1384	924	977	1237	1522	849	1438	944	1469	1005
207	1822	1288	956	611	646	445	711	782	647	1181	469	404	2098	1195	548	699	808	502	595	756	708	1109	510	324	1836	1719	1648	1549	1462	2042	1040	1834	1333	2137	1290	1657	906	1353	1573	1467	915	1156	1059	1761	1032	1660	892	1334	962
208	1692	1488	876	548	791	403	728	714	756	1073	496	300	1835	1166	604	679	961	514	688	682	789	1123	453	507	1761	1966	1747	1345	1153	1822	1057	1739	1636	1924	1049	1563	937	1124	1523	1293	952	1222	1251	1651	876	1640	865	1236	952
209	1757	1418	997	572	769	442	814	743	864	1177	544	380	1661	1147	389	603	1019	504	709	712	815	1174	399	240	1771	1815	1755	1374	1330	1881	1506	1892	1583	2163	1428	1493	906	1496	1569	1417	956	1246	1160	1583	880	1642	929	1371	664
210	1767	1228	1008	684	681	503	736	880	731	1119	567	370	2108	1074	339	655	947	371	587	667	629	1176	402	319	1636	1831	1864	1471	1421	1764	1396	1638	1500	2021	1154	1481	973	1403	1427	1419	865	938	1035	1721	794	1525	1225	1475	799
211	1908	1197	919	520	781	403	783	753	696	1033	287	451	1697	930	510	752	1031	472	798	680	826	1289	443	328	1922	1801	1813	1288	1368	1892	1271	1783	1570	1806	956	1692	874	1270	1594	1364	1024	1160	1070	1819	962	1652	1214	1353	967
212	1849	1317	929	706	688	481	733	808	642	1141	464	385	2015	1234	483	679	1033	430	666	631	679	1248	438	237	1789	1838	1748	1243	1456	1815	1214	1538	1531	2084	1640	1518	932	1359	1712	1237	1059	1194	1123	1838	776	1658	816	1281	929
213	1756	1172	748	541	729	295	771	804	691	1168	573	426	1719	1112	485	685	1023	402	655	680	768	1104	408	282	1912	1700	1668	1346	1432	1885	1054	1677	1381	2006	1010	1677	971	1279	1680	1291	975	1201	1242	1793	991	1764	809	1337	887
214	1926	1156	808	568	707	331	774	789	631	1079	510	337	1860	1074	668	639	1037	507	705	555	745	1119	467	301	1733	1815	1634	1413	1396	1658	1372	1665	1438	1889	1350	1494	1003	1328	1803	1324	912	1124	1139	1777	966	1624	886	1298	752
215	1813	1041	843	760	720	498	834	703	663	1052	516	425	1695	1031	664	662	966	450	572	583	550	1284	378	362	1571	1948	1530	1291	1361	1416	1662	1342	1448	1942	1508	1739	761	1426	1625	1091	937	990	1118	1661	963	1756	844	1358	899
216	1801	1090	919	636	795	314	832	819	639	1030	504	338	1741	1162	634	702	979	402	661	666	704	1011	464	428	1703	1930	1396	1350	1510	1718	1386	1503	1376	1763	1536	1451	805	1134	1774	1244	955	1116	1163	1635	897	1637	856	1275	779
217	1823	1210	706	748	704	432	758	717	639	1043	505	480	1879	1245	471	732	971	465	621	694	714	1034	447	346	1663	1771	1556	1286	1345	1589	1224	1749	1352	1985	1343	1511	905	1321	1514	1284	877	932	1358	1699	967	1692	1186	1389	885
218	1948	1112	756	559	707	451	869	736	657	972	555	321	1822	1163	597	570	1133	358	656	687	826	979	375	397	1575	1700	1447	1368	1330	1443	946	1501	1247	1922	1291	1494	867	1314	1557	1264	896	975	1177	1858	992	1599	938	1283	740
219	1824	1122	825	654	854	337	726	680	680	1025	587	375	1896	888	598	622	1048	333	801	604	828	979	332	267	1613	1859	1412	1162	1180	1507	1243	1481	1435	1705	1025	1588	708	1271	1603	1377	925	1208	1262	1820	913	1545	813	1365	820
220	1755	1139	780	598	644	534	763	695	523	1016	478	402	1934	1159	622	680	1055	343	673	628	550	1048	538	314	1524	1857	1429	1169	1390	1663	1433	1365	1376	1994	973	1341	844	1195	1759	1287	905	1145	1202	1755	980	1492	736	1287	916
221	1789	1102	756	695	637	452	706	883	653	806	662	444	1892	995	605	549	902	420	781	738	699	960	400	435	1594	1983	1236	1089	1174	1405	940	1320	1287	2047	1087	1542	852	1250	1686	1310	935	1111	1229	1713	957	1591	973	1336	765
222	1939	960	677	482	835	328	759	774	652	1048	511	286	1737	1192	502	770	945	440	616	609	590	971	444	373	1581	1854	1463	1280	1440	1583	1209	1401	1302	1841	1234	1492	856	1355	1570	1291	754	1142	1270	1775	900	1597	780	1344	696
223	1722	1039	729	617	845	379	826	654	676	962	552	326	1873	1020	610	624	801	419	544	695	734	1060	402	414	1675	1954	1433	1398	1359	1428	1048	1421	1411	2027	1391	1464	658	1335	1586	1119	824	953	1274	1791	840	1397	864	1358	603
224	1808	974	639	543	936	501	820	712	635	818	535	420	1712	975	546	653	958	520	560	605	807	1041	517	361	1612	1897	1391	1215	1219	1448	1269	1520	1399	1727	1014	1553	823	1304	1589	1245	906	843	998	1661	897	1572	931	1169	895
225	1700	1061	666	651	828	303	674	683	624	1000	451	347	1914	941	572	732	1008	473	762	719	752	1109	384	410	1608	1843	1561	1266	1399	1446	1281	1492	1434	1762	852	1470	948	1285	1661	1255	941	965	1128	1665	958	1320	861	1346	776
226	1901	1060	604	537	1041	313	564	714	654	1059	561	383	1780	1093	522	650	870	320	729	562	720	1083	517	257	1522	1796	1444	1225	1262	1395	1301	1455	1266	1947	1166	1360	771	1229	1761	1144	745	845	1122	1565	1064	1286	1058	1304	841
227	1845	1075	575	667	1056	400	789	758	540	914	366	389	1794	1007	656	688	825	400	581	642	788	958	373	418	1436	1925	1380	1223	1272	1445	1284	1329	1250	1666	1121	1518	851	1284	1509	1103	914	931	1274	1624	823	1442	1073	1339	771
228	1715	957	669	571	918	538	741	747	701	1038	505	266	1915	1275	522	706	795	213	750	605	708	1069	491	404	1604	1735	1283	1102	1261	1448	1224	1259	1466	1919	1049	1490	768	1302	1606	1106	893	932	1255	1796	950	1493	781	1323	900
229	1823	953	720	573	969	407	694	663	515	774	487	260	1798	1049	755	671	798	447	596	741	745	974	431	395	1511	1803	1513	1238	1413	1349	964	1429	1182	1763	924	1545	719	1317	1560	1124	1050	927	1261	1759	1030	1383	931	1368	875
230	1688	1079	631	558	944	582	813	679	693	905	554	294	1747	1071	419	553	762	455	595	636	607	945	450	403	1547	1794	1434	1179	1394	1384	1173	1341	1269	1917	1103	1312	644	1443	1648	1326	830	975	1047	1655	953	1439	853	1245	889
231	1979	1017	648	620	860	379	737	763	665	968	587	399	1747	1109	576	632	796	495	676	774	727	1015	395	378	1546	1774	1384	1341	1194	1541	1256	1342	1326	1884	956	1307	786	1172	1537	1221	932	897	1121	1596	958	1357	848	1262	742
232	1708	1121	517	639	870	327	765	633	720	861	484	440	2017	859	521	665	786	524	663	514	625	926	503	291	1609	1792	1450	1188	1297	1462	978	1337	1260	1866	1176	1407	636	1093	1805	1049	865	1053	1266	1523	906	1383	814	1418	862
233	1547	970	546	538	914	320	638	659	671	791	504	243	1716	994	564	742	908	538	566	691	740	1004	409	324	1351	1686	1544	1474	1209	1331	1247	1419	1255	1624	1118	1332	682	1272	1605	1174	904	737	834	1896	1002	1195	976	1299	793
234	1720	943	583	578	1003	344	731	829	513	836	529	364	1888	976	497	604	1002	397	723	637	745	976	503	358	1547	1844	1273	1264	1315	1348	1229	1517	1197	1829	1039	1394	774	1247	1630	981	913	766	1171	1653	926	1281	864	1431	900
235	2083	889	618	373	968	462	705	657	523	916	569	319	1699	997	512	747	890	491	669	649	750	1026	393	287	1286	1950	1415	984	1144	1482	910	1446	1381	1838	909	1377	674	1407	1614	1097	931	944	1196	1747	947	1403	718	1331	840
236	2069	956	417	479	907	412	653	878	585	882	588	477	1762	888	557	624	847	502	596	589	646	890	430	314	1493	1858	1548	1019	1253	1354	1337	1231	1112	1756	905	1256	658	1353	1713	1266	861	1155	1011	1778	962	1179	925	1194	941
237	1692	818	454	502	962	415	738	667	616	1011	646	273	1694	882	556	571	885	286	632	501	787	923	430	405	1325	1945	1511	1156	1227	1380	1319	1435	1278	1729	920	1306	693	1313	1606	1174	773	931	1084	1869	795	1545	806	1226	704
238	1821	971	422	587	942	373	718	658	665	822	531	355	1709	910	601	637	804	396	660	642	619	943	475	398	1702	1772	1434	997	1280	1363	1172	1421	1389	1629	1047	1347	697	1267	1734	1133	973	1064	1118	1634	990	1336	834	1256	653
239	1962	1041	633	646	880	384	731	778	640	891	455	392	1949	932	533	739	785	473	694	634	604	860	454	320	1738	1871	1223	1253	1137	1314	1434	1488	1149	1537	601	1343	757	1225	1615	1192	865	901	1087	1548	872	1336	834	1306	873
240	1728	1029	429	649	844	496	790	713	594	838	539	331	1635	1109	619	788	907	323	789	839	834	951	455	304	1581	1785	1341	1206	1264	1291	1452	1261	1273	1656	895	1333	703	1407	1503	1153	874	1164	1073	1590	1082	1422	1000	1371	799
241	1812	957	618	480	892	446	793	678	548	1001	579	394	1674	1048	494	580	964	530	558	579	745	1006	414	401	1462	1755	1260	1039	1413	1198	1342	1432	1322	1699	631	1307	691	1300	1726	1154	879	1130	1048	1695	973	1270	1145	1312	886
242	1831	945	646	720	883	428	659	638	608	864	544	318	1979	956	564	671	934	572	655	630	822	899	328	351	1545	1817	1292	1083	1211	1284	1347	1354	1353	1842	854	1385	703	1301	1616	1280	980	1098	1121	1650	887	1076	1049	1269	808
243	1731	1209	613	554	815	476	770	725	369	842	509	313	1702	1004	581	541	824	333	691	476	639	841	443	290	1381	1788	1241	1195	1207	1240	1197	1383	1132	1936	967	1366	709	1367	1627	1115	922	1068	1019	1771	983	1198	880	1300	872
244	1818	897	531	459	709	434	626	722	707	780	604	464	1875	1077	416	606	840	450	634	729	583	1023	472	324	1679	2031	1216	1133	1168	1250	1317	1357	1242	1844	945	1347	496	1229	1739	1025	758	976	1137	1746	1009	1285	1127	1193	768
245	1657	1108	588	561	858	368	643	716	621	723	376	281	1746	959	694	564	895	349	568	651	613	1040	380	184	1636	1874	1452	1096	1228	1320	906	1180	1516	1668	938	1243	662	1232	1586	1311	777	1236	1214	1758	988	1191	961	1236	1019
246	2170	913	572	483	819	420	616	673	609	647	601	341	2195	1056	489	692	740	611	635	530	698	798	380	438	1436	1982	1242	1003	1238	1362	966	1270	1261	1666	596	1117	583	1210	1710	1215	1009	843	1030	1751	940	1276	1045	1434	753
247	1757	827	584	484	870	366	659	748	543	813	567	246	2229	1082	529	713	713	403	637	645	670	1001	476	267	1423	1877	1131	1219	1241	997	826	1509	1088	1747	677	1145	689	1411	1652	1084	904	833	1188	1765	889	1139	985	1381	989
248	1882	981	582	720	930	439	646	743	630	653	508	424	1755	1023	519	658	763	553	641	616	709	972	488	386	1558	1756	1035	1120	1131	1152	1050	1290	1198	1779	975	1327	731	1311	1717	1362	881	1013	1095	1756	970	1111	908	1170	772
249	1857	1089	584	639	704	496	583	680	615	700	420	333	2183	997	548	840	874	442	640	639	661	897	523	396	1631	1786	1144	940	1230	1329	1387	1346	1276	1729	834	1387	758	1285	1632	1000	991	1125	1209	1737	899	1159	1063	1230	883
250	1862	1091	534	586	924	272	648	647	504	713	371	475	2078	909	676	632	771	409	588	723	581	806	246	269	1596	1925	1363	952	1266	1156	1265	1331	1139	1740	758	1235	742	1304	1451	1060	914	1071	1164	1832	864	1270	908	1449	798
251	1740	1043	520	601	787	311	676	595	666	730	401	257	2043	927	508	658	666	394	544	628	686	880	474	409	1467	1926	1360	1115	1184	1217	1272	1340	1062	1707	581	1458	727	1204	1663	1172	979	963	1174	1811	1134	1089	865	1332	736
252	1985	959	499	606	938	430	529	690	667	726	490	299	1813	982	600	645	668	482	635	703	722	901	441	407	1508	1818	1205	1100	1437	1307	1271	1381	1190	1575	875	1259	750	1450	1668	1134	967	1031	1326	2021	1104	1222	1062	1231	781
253	1853	843	454	592	903	453	600	668	692	785	501	299	1930	1030	532	782	715	451	677	669	659	750	387	226	1439	1946	1240	953	1168	1108	1080	1324	1209	1604	608	1315	684	1146	1676	1188	885	939	1075	2031	1076	1102	965	1246	787
254	2120	1137	420	606	802	460	623	801	585	741	464	506	1936	806	512	527	584	390	717	632	728	869	297	220	1354	1878	1256	1295	1268	1259	1593	1366	1077	1659	987	1425	669	1198	1570	1080	801	955	1252	1955	925	1241	962	1345	833
255	1933	945	593	580	899	316	615	747	639	807	485	435	1859	905	451	619	544	379	660	587	726	844	385	325	1445	1763	1289	1075	1398	1294	1215	1319	1288	1879	565	1325	692	1253	2084	1007	834	1242	1011	1987	973	1360	981	1176	958
256	1817	910	591	637	781	347	516	732	558	732	528	312	2154	948	627	647	610	396	544	642	831	767	418	245	1593	1818	1404	1233	1160	1199	1433	1454	1082	1598	482	1290	783	1289	1613	976	921	1058	1139	2181	928	1118	1021	1247	646
257	1681	1120	615	563	816	378	675	752	642	805	518	423	1712	758	573	757	980	307	779	648	558	908	402	290	1755	1830	1208	1005	1369	1323	1287	1328	1337	1747	731	1500	656	1074	1585	1202	891	1079	994	2134	902	1245	968	1307	785
258	1975	893	580	579	860	504	717	652	425	897	414	388	1770	1040	589	691	714	403	653	677	690	826	415	408	1458	1847	1269	1350	1469	1100	1069	1420	1047	1665	599	1458	779	1151	1522	1191	1022	881	1157	2086	960	1263	879	1188	845
259	1768	1081	451	511	854	393	576	761	621	770	635	395	2072	939	566	641	685	244	649	624	624	909	384	452	1446	2139	1024	1056	1242	1034	1085	1385	1091	1528	667	1296	910	1306	1564	1224	1017	965	1126	2062	1044	1154	955	1385	1061
260	1700	1042	557	602	965	415	578	811	605	861	602	429	1845	1046	549	557	611	428	491	661	749	952	374	320	1353	1730	1124	1156	1220	1214	1381	1546	1061	1671	822	1353	768	1285	1448	1309	852	862	1114	2081	840	1141	1089	1288	779
261	1652	971	583	556	763	462	640	746	618	798	461	353	1756	827	564	612	598	332	637	536	610	924	329	268	1534	1701	1308	1118	1212	1229	834	1279	1204	1677	649	1146	663	1292	1578	1231	783	1029	1159	1605	949	1095	935	1223	746
262	1592	937	581	597	842	421	651	869	680	916	558	273	2035	860	647	769	601	452	621	693	650	978	378	306	1462	1856	1135	1151	1354	1020	1263	1362	1138	1710	709	1253	814	1188	1589	1223	845	1132	1182	1909	944	1207	927	1172	850
263	2164	886	505	639	726	338	716	682	668	787	395	406	1817	1051	653	666	587	375	592	537	577	868	398	378	1573	1723	1135	1012	1482	1149	1322	1342	1186	1760	747	1187	726	1257	1580	1288	888	1017	991	2304	961	1210	979	1358	862
264	2090	1082	516	528	850	418	712	764	574	842	413	423	1634	905	623	696	655	401	600	517	758	847	439	299	1419	1929	1135	1030	1234	1323	1036	1220	1382	1798	815	1335	605	1380	1777	1018	1074	1041	965	2077	972	858	860	1157	703
265	1766	1014	563	526	738	347	521	822	777	876	474	282	2224	993	525	810	528	508	746	717	666	996	334	357	1536	2009	1113	1045	1084	1112	1234	1299	1252	1615	775	1038	637	1206	1535	1204	856	823	1210	1896	974	1041	919	1179	744
266	1778	1025	430	523	657	456	582	774	616	739	430	356	1695	972	233	780	653	520	764	625	660	856	463	278	1473	1787	1209	1316	1281	1154	824	1374	1100	1642	678	1183	490	1296	1475	1098	1024	1012	1026	1742	891	1063	892	1149	790
267	2099	1064	490	709	698	358	667	633	696	790	556	386	1681	776	562	669	745	421	771	596	792	890	448	322	1631	1947	1340	1241	1291	1189	1199	1261	1206	1571	733	1384	710	1278	1533	1113	1075	1103	951	1925	1036	1262	718	1218	742
268	2218	947	469	649	720	336	609	797	670	894	462	401	1974	810	508	705	789	354	766	571	695	859	488	295	1341	1913	1012	1117	1396	1030	1218	1346	1151	1715	652	1132	614	1435	1675	1145	913	967	1086	1930	860	1142	1139	1242	921
269	1806	1036	385	445	761	365	655	767	710	924	334	389	1709	1055	613	688	631	393	590	548	628	818	483	355	1558	1799	1089	1075	1121	1095	1360	1397	1213	1768	840	1390	626	1162	1547	1170	969	1130	1098	1755	891	1315	1012	1267	1011
270	1750	831	569	634	805	402	541	746	659	868	399	356	2026	1106	568	800	640	556	733	522	581	754	405	407	1432	1724	1274	1010	1174	1144	1347	1368	1208	1833	820	1215	761	1250	1505	1052	951	909	1135	1787	909	1078	890	1381	738
271	1876	1123	493	540	808	490	683	826	638	894	449	332	1959	1039	579	755	743	359	635	727	705	910	471	308	1462	1796	1330	1152	1191	1243	999	1478	1081	1514	908	1495	696	1202	1330	1213	881	822	1142	1778	972	1031	846	1297	620
272	2094	1232	675	564	910	386	470	607	594	816	397	436	2096	994	538	662	550	310	647	603	632	893	451	348	1483	1815	1154	1194	1222	1315	1418	1291	1132	1604	872	1207	733	1269	1824	1077	869	1034	1176	1752	963	1159	769	1359	868
273	1891	884	621	526	610	361	639	797	500	904	264	380	1731	946	409	747	733	371	778	640	571	864	501	362	1336	1898	1361	1091	1243	1278	1265	1368	1273	1733	607	1367	510	1539	1557	1086	965	1140	1190	1786	1038	897	843	1291	843
274	1948	967	557	612	803	300	550	720	625	913	456	304	1685	1081	670	638	912	382	619	642	713	856	366	380	1473	1830	1255	966	1338	1251	917	1271	1368	1635	763	1350	792	1282	1626	983	983	1149	1125	1726	900	632	769	1018	750
275	1756	999	417	676	706	368	607	824	501	880	525	339	1722	1069	633	518	710	350	699	651	631	870	319	416	1507	1946	1301	1173	1282	1198	1109	1268	1214	1726	876	1386	898	1350	1606	1131	836	1190	1093	1863	934	770	980	1156	706
276	1777	1104	513	539	654	466	625	728	532	905	590	375	1758	1143	621	692	675	449	596	627	801	899	448	424	1429	2006	1226	1313	1234	1221	1250	1337	1263	1864	753	1556	603	1272	1489	1196	934	967	1249	1696	1075	1051	745	1134	829
277	1813	1093	600	468	621	318	540	706	660	721	572	355	1754	1024	519	760	622	371	711	504	466	840	375	359	1658	1808	1266	1164	1145	1052	811	1299	1311	1768	920	1507	695	1268	1554	1014	1013	1105	1201	1640	832	964	988	1308	841
278	1647	802	532	561	701	337	658	773	629	853	493	243	1629	904	488	633	606	507	538	539	633	962	344	314	1493	1879	1207	1177	1266	1175	1160	1139	1263	1642	929	1328	708	1197	1658	1141	751	1174	1168	1852	844	901	719	1249	804
279	2104	842	617	707	753	406	471	659	680	861	436	330	1908	1099	564	689	695	514	559	570	725	815	503	336	1542	1766	1076	1344	1362	1050	1112	1484	1212	1656	819	1280	662	1380	1668	1293	777	1042	1122	1727	1050	928	952	1095	839
280	2212	1027	601	532	697	328	689	709	708	790	539	343	1712	957	498	671	664	423	707	605	596	828	322	355	1613	1768	1159	1122	1474	1117	1298	1510	1018	1713	685	1575	721	1172	1795	1215	948	952	1171	2060	987	1086	1046	1275	762
281	1733	1126	476	659	711	457	508	715	628	943	391	378	1668	987	597	665	623	456	755	766	757	938	450	403	1646	1753	1159	1058	1109	1037	1027	1466	1249	1673	1061	1348	714	1354	1580	1366	973	1028	1116	1977	999	973	809	1421	830
282	2050	730	411	518	728	440	663	751	666	755	411	372	1688	912	561	737	667	441	624	558	574	947	465	251	1655	1815	1222	1202	1193	1125	1125	1343	1209	1738	951	1456	716	1508	1550	1089	1013	1158	1185	1822	1086	1124	1081	1354	688
283	1825	991	577	474	765	394	563	680	502	701	425	387	1699	832	603	535	681	498	687	563	756	953	392	386	1531	1938	1167	1078	1265	989	957	1368	1153	1739	848	1577	837	1274	1828	1053	997	1075	1087	1830	814	1085	1044	1235	835
284	1833	946	561	535	693	401	624	680	592	670	452	349	1859	905	548	684	647	629	666	624	703	956	353	413	1605	1835	1133	1176	1165	1193	1465	1237	1227	1622	837	1479	716	1389	1718	1147	935	1048	1208	1644	1076	946	672	1408	793
285	2140	1127	476	598	561	416	548	695	652	794	349	324	2099	841	599	684	620	443	679	535	809	907	430	402	1504	1805	1284	1249	1113	949	1114	1303	1313	1617	599	1363	830	1343	1799	1239	935	982	1087	1824	994	947	867	1251	786
286	1794	1133	483	429	748	324	675	688	666	774	509	299	1682	812	507	639	620	527	730	564	766	894	456	469	1300	1804	1185	1294	1218	1139	904	1491	1130	1730	740	1395	764	1292	1760	1253	1051	1180	1047	2015	999	780	1059	1107	682
287	2081	1014	523	688	722	470	603	643	787	931	564	290	2153	891	512	785	568	577	577	664	800	791	348	315	1478	1879	1239	1033	1261	1009	1221	1390	1181	1747	457	1484	722	1413	1514	1229	984	971	1264	1582	936	737	776	1347	701
288	1757	972	459	479	668	471	685	782	534	921	394	408	1761	1094	701	825	619	441	638	633	795	728	380	324	1520	1845	1218	1139	1277	968	1008	1192	1064	1674	644	1438	590	1463	1758	1239	881	1010	1109	1955	971	783	1190	1149	887
289	1688	1151	609	505	648	502	514	617	681	948	461	355	2003	815	594	689	603	515	662	638	502	833	480	293	1550	1830	1353	1284	1387	1001	973	1330	1036	1450	565	1499	871	1304	1714	1307	672	1045	1178	1516	1011	1069	675	1341	977
290	1707	1134	470	521	683	346	712	686	639	707	495	334	1915	993	599	677	680	514	543	667	738	825	482	238	1473	1975	1316	1108	1281	1038	1118	1269	1115	1696	744	1522	701	1283	1599	1048	644	1028	1117	1858	950	1006	773	1363	699
291	2078	1177	549	572	715	326	526	615	631	801	314	339	1808	905	480	832	831	453	632	643	666	921	445	316	1588	1736	1075	1175	1126	1076	1028	1387	1261	1593	919	1540	808	1383	1461	1178	910	1126	1133	1822	1099	811	923	1268	926
292	1535	892	530	547	670	559	412	809	646	800	393	408	1744	904	630	562	555	325	695	653	656	823	409	333	1431	1839	1142	1119	1317	900	1470	1315	1103	1558	810	1481	787	1361	1602	1136	864	1108	1379	1827	1006	963	837	1286	749
293	1558	849	444	507	727	417	582	714	579	886	395	363	2048	1090	603	677	709	576	670	608	735	925	419	351	1535	1989	1062	1059	1344	1090	1120	1386	1185	1735	640	1429	733	1336	1466	1055	877	1050	1204	1721	1095	950	991	1352	786
294	1715	1136	687	541	789	350	731	694	593	799	481	320	1766	926	458	670	965	498	630	573	744	795	407	329	1493	1791	1345	1121	1315	1068	1381	1347	1339	1705	648	1484	800	1270	1566	1123	823	1054	1118	2010	1030	1096	812	1216	783
295	1814	1085	536	617	856	391	628	815	632	781	290	382	2057	921	629	660	661	411	806	539	671	820	446	371	1455	1733	1267	969	1315	1135	1335	1366	1195	1708	611	1407	691	1328	1720	1138	939	931	1083	1946	1182	1010	915	1372	844
296	1624	790	381	479	675	366	609	575	595	836	294	391	1688	974	538	580	630	392	718	624	724	900	352	367	1437	1970	1186	1159	1287	1050	1067	1519	1388	1670	911	1565	768	1297	1639	1133	936	1089	1279	1750	1127	947	852	1270	797
297	1783	1013	520	682	697	273	750	834	739	975	348	231	2003	794	604	761	682	316	625	695	613	869	420	285	1599	1895	1178	1234	1387	978	1073	1338	1100	1590	648	1535	876	1434	1584	1196	879	1062	1225	1675	1170	975	1087	1447	800
298	1683	840	550	615	939	421	629	710	615	863	373	256	1834	954	625	787	624	305	595	730	670	848	449	269	1528	1736	1099	1041	1536	1058	1335	1349	1228	1721	667	1465	639	1201	1768	1269	976	1078	1234	1988	1131	851	740	1274	910
299	1816	932	531	545	743	325	616	684	682	769	270	359	2053	960	484	658	510	482	608	639	635	793	379	379	1419	1891	1260	1231	1169	960	1299	1318	1234	1709	836	1457	780	1307	1694	1217	845	1037	1094	1906	1099	939	777	1493	916
300	1917	999	525	632	690	431	710	597	620	871	410	313	1994	931	654	819	928	300	665	627	588	773	467	442	1443	2009	1160	1158	1162	1029	1180	1476	1336	1606	854	1403	830	1385	1624	1199	1075	1167	1121	2215	982	1108	693	1399	868
301	2008	955	575	556	675	542	601	652	725	912	541	445	1981	1071	481	639	494	350	729	654	606	839	323	315	1678	1929	1006	1263	1230	1138	1197	1198	1126	1738	650	1385	623	1305	1768	1252	774	1081	1260	1821	1108	935	997	1351	519
[truncated: 504 more columns]

## Sheet: unc9unc7 Rescues AWA&AIA
Figures 2F, 2S-1E, 4S-2I
AIA::GCaMP5A F(A.U.)
Stimulus:	1.15 µM diacetyl
Genotype:	unc-7(e5)																																															unc-9(fc16) unc-7(e5)
N:	1	2	3	4	5	6	7	8	9	10	11	12	13	14	15	16	17	18	19	20	21	22	23	24	25	26	27	28	29	30	31	32	33	34	35	36	37	38	39	40	41	42	43	44	45	46		1	2
Frame (Pulse at 100)
1	1088	2645	855	1484	1757	1170	1160	705	791	1565	959	952	992	1393	2023	918	1040	959	611	826	628	393	1289	944	2444	989	1290	1431	1140	1042	805	1526	1144	1079	933	951	1280	1491	432	1159	1524	687	681	572	288	919		1198	1229
2	1138	2270	1073	1368	1269	1393	1381	919	786	1642	976	968	929	1409	1749	690	812	795	765	820	772	335	1115	1014	2514	874	1256	971	1212	1000	846	1654	1083	1035	1018	786	1441	1426	998	1081	1439	662	752	619	318	934		1024	1278
3	1118	2007	825	1520	1554	1278	1128	897	585	1459	1030	900	970	1517	1706	782	1102	709	873	666	597	321	1247	1282	1735	895	1494	1252	1231	948	793	1496	1243	993	826	898	1343	1529	895	1039	1497	644	773	593	338	785		1070	1205
4	1137	2187	979	1419	1593	1321	956	934	667	1532	1080	953	979	1452	1538	632	1083	946	653	777	657	281	1110	1062	568	1059	1151	1350	1256	1006	685	1772	1185	1055	821	941	1628	1391	1102	1161	1551	713	843	531	303	1019		1040	1159
5	1130	2383	982	1521	1542	978	1145	899	846	1334	1156	1009	1144	1598	1733	810	1066	841	726	635	632	367	1305	1019	488	974	1207	1295	1284	880	765	1626	1280	1008	825	945	1416	1844	909	1214	1601	769	684	648	243	1027		1060	1259
6	1218	2659	816	1598	1551	1188	1070	801	618	1430	936	886	1025	1841	2012	820	975	790	749	676	706	268	1168	1136	331	900	1331	1331	1189	883	743	1583	1745	997	834	993	1307	1354	1012	1213	1559	624	840	457	403	782		1007	1073
7	1031	2173	890	1482	1631	1283	1436	689	632	1707	1112	907	999	1512	1373	820	993	855	756	865	552	421	1137	1011	268	828	1278	1218	1221	953	675	1623	2099	1023	969	849	1382	1544	1040	1193	1570	848	893	706	305	986		1044	1217
8	1056	2196	849	1492	1522	1205	1325	700	612	1567	946	832	904	1508	1964	741	949	864	836	670	554	273	1220	1055	493	1021	1354	1261	1209	991	897	1718	1935	996	848	1104	1283	1309	1003	1208	1483	721	670	549	402	766		987	1093
9	1221	2678	887	1603	1565	1200	1046	838	573	1590	1105	758	956	1320	1430	883	825	981	717	722	569	373	1195	1185	1116	886	1365	1387	1380	774	852	1789	1353	990	811	867	1253	1280	871	1165	1407	737	752	541	246	895		1017	1141
10	1225	2532	985	1508	1510	1290	1293	755	624	1439	1193	962	964	1655	1923	740	892	983	788	861	749	443	951	1179	976	950	1170	1408	1305	791	601	1610	1893	904	835	991	1362	1604	860	1245	1461	600	865	603	268	842		1019	1022
11	1042	2087	883	1390	1671	1163	1262	851	620	1526	801	897	882	1477	1580	842	973	914	675	745	671	337	1163	1099	996	967	1142	1270	1170	714	910	1599	1362	997	932	958	1419	1473	821	1158	1351	888	669	542	268	888		1064	1095
12	1003	2418	1013	1337	1427	1173	1213	1185	666	1459	1186	904	842	1576	1471	824	1040	1022	913	706	530	336	1161	1059	791	968	1273	1256	1292	800	819	1860	1933	1070	1101	1145	1727	1529	963	1180	1384	588	756	567	253	870		937	1263
13	1075	2188	953	1527	1510	1362	1220	1103	612	1393	999	1063	1004	1398	1664	835	1025	929	727	823	558	292	1159	1339	727	877	1178	1372	1328	817	734	1846	1450	980	930	1055	1351	1254	944	1198	1329	673	754	550	479	1038		1247	1195
14	1150	2718	967	1557	1546	1264	1225	1438	637	1379	724	923	1001	1394	1886	918	1004	828	839	660	622	266	1166	1195	144	973	1215	1318	1334	959	767	1890	1460	935	1100	1022	1503	1422	949	1169	1433	655	804	485	292	831		1104	1220
15	1055	2557	1028	1513	1634	1214	1244	1141	551	1503	1280	778	948	1411	1838	926	1020	877	948	864	538	279	1136	1106	322	915	1251	1262	1142	556	758	1893	1951	1114	1000	993	1433	1584	929	1038	1137	577	782	442	271	1053		1063	951
16	1237	2746	882	1410	1577	1107	1201	1460	612	1487	1154	916	977	1387	1870	790	1093	1118	834	712	660	299	1194	1180	170	935	1206	1211	1164	894	711	1664	1439	1101	841	1158	1322	1318	1005	1182	1474	752	750	553	416	936		1061	1143
17	1159	2330	962	1301	1445	1189	1225	2205	472	1575	1266	847	923	1345	1478	783	1026	1117	736	798	615	336	1149	1210	294	1057	1247	1247	1309	613	696	1758	1752	1034	1032	1026	1427	1631	883	1209	1590	738	894	545	261	815		1184	1176
18	1152	2657	1065	1483	1512	1074	1269	2251	698	1407	717	972	923	1392	1712	805	948	1009	881	743	647	354	1359	1259	312	943	1385	1328	1288	620	786	1570	1629	933	866	728	1186	1486	986	1182	1398	645	765	594	273	888		1180	1299
19	1050	2549	955	1452	1420	1211	1031	2025	566	1650	985	903	1002	1436	1613	773	990	1298	685	857	562	268	1048	1281	183	897	1238	1196	1151	848	825	1591	2232	980	785	930	1377	1543	989	1205	1331	621	848	741	231	969		974	1200
20	1117	2538	947	1327	1599	1228	1021	2213	598	1469	1141	964	998	1701	1603	742	1062	1176	927	752	530	391	1217	1111	494	959	1330	1308	1219	556	804	1582	1836	981	773	981	1408	1441	903	1178	1465	741	784	508	197	897		1155	1187
21	1041	2572	764	1298	1454	1102	1394	1793	667	1391	995	861	885	1536	1527	908	1130	1316	718	863	693	352	1184	1330	820	846	1157	1267	1393	660	858	1736	1961	1138	905	912	1405	1582	1025	1190	1346	678	541	502	296	833		1020	1209
22	1013	2585	1005	1498	1527	1281	1400	1968	516	1486	1165	1035	1033	1542	1449	862	1028	1308	743	717	706	265	945	1164	436	982	1214	1339	1048	738	844	1836	1535	976	954	1008	1548	1343	968	1063	1312	682	933	583	286	944		968	1311
23	1201	1961	993	1483	1436	1012	1298	1817	539	1604	803	948	954	1403	1377	808	1210	1292	745	896	735	213	1137	1250	805	912	1207	1191	1286	605	667	1655	1578	986	998	979	1515	1856	993	1133	1315	855	851	535	282	901		1135	1263
24	1059	2440	1007	1507	1621	1224	1196	1872	512	1427	948	881	991	1290	1882	758	1025	1187	687	978	578	302	1263	1163	982	998	1177	1083	1207	616	907	1646	1559	1013	1053	1014	1409	1444	1184	1243	1433	614	819	599	355	867		991	1336
25	1118	2005	946	1429	1642	1279	1372	2045	510	1318	1066	819	969	1622	1645	842	972	1296	813	806	565	275	1200	1125	1440	969	1273	1294	1200	661	811	1983	1487	1045	1078	916	1434	1770	949	1192	1263	652	842	534	324	967		1149	1059
26	1188	2439	1122	1476	1528	1047	1117	1518	708	1517	1213	928	908	1433	1794	926	989	1120	736	848	693	266	1170	1142	1356	1000	1147	1210	1355	487	919	1969	1960	1034	1037	1060	1632	1286	993	1163	1262	646	884	570	197	867		1080	1797
27	994	2193	971	1521	1510	1325	1100	2288	612	1541	876	987	943	1326	1426	925	1042	1131	656	767	692	360	1085	1138	1677	987	1385	1239	1396	337	868	1576	1655	899	979	1019	1396	1307	1014	1060	1408	692	764	537	307	982		1120	1688
28	1256	2342	937	1442	1588	1357	1188	1553	516	1460	1000	1071	1054	1283	1639	793	982	1115	664	766	617	380	1249	1124	1755	863	1146	1198	1226	391	759	1871	1345	1122	787	876	1314	1389	890	1017	1273	860	803	607	269	815		1140	1474
29	1022	2396	1149	1444	1620	1277	1271	2101	560	1448	1166	905	769	1402	1766	777	976	1180	827	670	764	341	1009	1101	1983	861	1305	1292	1282	446	671	1636	1989	974	775	848	1354	1470	1099	1021	1179	748	875	632	306	856		1117	1679
30	1085	2490	921	1341	1598	1190	1294	1342	680	1519	809	1021	942	1428	1599	716	1017	1001	821	822	536	257	1151	1199	2060	1004	1343	1186	1091	637	712	1684	1511	943	926	972	1643	1529	877	1183	1174	693	714	613	297	812		1017	1566
31	1174	2388	1010	1289	1383	1070	1083	1791	951	1517	1077	855	875	1354	1556	751	976	1177	713	743	596	238	1291	1174	2519	1038	1450	1258	1278	654	743	1717	1903	1058	817	863	1414	1678	927	1202	1208	533	803	722	309	956		985	1658
32	1193	2202	905	1496	1578	1334	1257	1765	868	1428	992	718	1050	1532	1370	910	903	1150	798	810	665	119	1218	1194	3027	1060	1344	1315	1269	449	831	1669	1708	1040	1058	776	1371	1603	975	1298	1199	686	939	710	352	870		1062	1562
33	1091	2508	956	1342	1489	1336	1334	1952	781	1540	1271	1039	906	1542	1710	926	1016	1179	791	677	540	349	1188	1224	3107	1004	1167	1235	1282	439	635	1742	1830	1037	741	937	1345	1546	865	1056	1275	652	677	610	204	1311		1195	1436
34	1209	2392	1033	1308	1485	1084	1161	1853	632	1445	898	891	986	1482	1584	793	990	1303	722	805	708	320	1252	1253	3091	856	1357	1299	1114	579	855	1630	1787	974	1008	838	1413	1563	1006	1142	1134	712	816	584	344	836		1142	1589
35	1077	2422	1021	1315	1505	1483	1284	1623	735	1593	1096	877	1055	1373	1659	823	1022	1176	651	880	589	263	1199	1228	3107	821	1353	1287	1259	486	707	1617	1535	1019	772	986	1320	1576	1108	1156	1288	806	684	627	314	1009		1187	1677
36	1054	2498	1074	1426	1652	1386	1281	2178	783	1463	1067	989	992	1378	1697	741	994	1292	690	969	684	213	1160	1234	2804	1103	1135	1217	1136	606	768	1655	1790	861	1027	920	1225	1468	939	1024	1222	728	779	434	267	1082		988	1678
37	1071	2565	913	1576	1566	1229	1266	2004	1064	1420	1335	1034	1014	1776	1809	796	943	1290	772	757	649	234	1141	1302	2942	894	1393	1261	1062	715	977	1600	1475	828	852	990	1221	1301	951	1149	1139	748	885	699	353	1237		1217	1906
38	1172	2634	1182	1429	1584	1328	1088	2235	544	1491	1149	835	925	1390	1534	752	966	1174	624	818	568	266	1076	1268	3158	940	1324	1326	1142	789	779	1547	1455	1203	955	902	1337	1415	1071	1142	1122	809	788	601	172	1254		1011	1585
39	1041	2489	1006	1503	1533	1221	1194	1948	487	1437	1100	843	1009	1894	1406	828	1049	1143	742	835	618	298	1246	1259	2981	993	1207	1223	1012	593	919	1617	1942	1034	894	972	1444	1432	1034	1086	963	806	703	532	342	1201		1302	1485
40	1290	2200	1054	1481	1415	1353	1083	2420	541	1581	982	828	907	1338	1760	731	973	1112	739	678	494	293	1096	1349	3198	1019	1201	1326	1237	691	849	1550	1687	1074	904	1097	1399	1764	843	1187	1195	613	803	572	263	879		1170	1612
41	1232	2253	1037	1505	1563	1178	1144	1378	617	1439	993	1016	946	1553	1521	737	1044	1099	761	850	621	389	1187	1317	3172	1003	1268	1122	1144	731	786	1520	1695	913	1167	836	1645	1397	949	1051	979	674	614	625	216	1059		1127	1571
42	1107	2529	919	1451	1639	1207	1168	1136	750	1433	899	913	874	1417	1584	815	1180	1185	728	663	683	282	1176	1347	3046	1096	1237	1276	1091	734	780	1549	2107	926	1126	1121	1423	1488	950	1039	1097	713	836	596	357	1370		1031	1362
43	1020	2244	1049	1418	1379	1362	1011	1371	569	1369	908	959	1054	1292	1635	747	921	1179	607	761	783	389	1120	1372	3237	917	1483	1179	1116	855	777	1479	1975	958	1078	924	1281	1370	1003	1157	1393	722	592	604	251	1184		1037	1780
44	1286	2228	940	1569	1374	1337	1138	1350	601	1486	1062	974	1000	1418	1801	717	899	1094	797	684	608	314	1160	1267	2977	904	1276	1350	1259	1083	860	1421	2181	1063	955	1004	1211	1677	1037	1117	1134	776	674	485	299	1190		1230	1464
45	998	2464	1071	1482	1486	1191	1040	1322	783	1550	756	1147	1032	1629	1641	751	987	1052	889	846	746	327	1285	1241	3001	916	1195	1377	1257	1009	840	1855	1770	977	927	951	1309	1556	1016	932	999	750	766	565	227	863		1059	1433
46	1217	2186	916	1380	1484	1094	1258	1888	432	1626	917	839	997	1400	1784	815	928	1124	722	814	661	256	1136	1425	2679	1023	1356	1299	978	1220	932	1853	2309	1070	1062	814	1642	1382	1043	1066	1069	733	718	596	432	914		1147	1558
47	1200	2255	1207	1585	1473	1151	1346	1460	622	1348	1106	1042	991	1312	1364	887	960	1148	742	749	638	423	1128	1466	2991	937	1201	1229	1273	1188	885	1950	2179	825	855	987	1309	1235	1076	1110	1207	701	886	586	303	885		1151	1534
48	1167	2341	978	1557	1632	1311	1020	1230	483	1576	998	705	828	1756	1407	670	977	1122	636	696	735	304	1227	1272	2785	990	1270	985	1227	1360	851	1886	2629	943	925	928	1268	1716	1005	985	1082	777	904	492	285	1268		1036	1469
49	1110	2661	794	1423	1275	1226	1206	968	583	1290	1187	1041	957	1432	1618	798	916	1179	676	949	721	351	1177	1437	2842	941	1390	1212	1240	1184	776	1769	2507	1021	948	1168	1536	1840	950	1207	1073	755	768	636	428	1129		1198	1432
50	1024	2400	980	1564	1542	1186	1102	1357	1008	1623	1125	779	938	1588	1783	773	997	1048	741	679	626	349	1191	1297	2838	963	1135	1252	1283	1219	707	1733	1757	1024	1010	1067	1556	1621	1084	1094	942	587	809	604	226	856		1018	1501
51	996	2320	950	1566	1635	1135	1187	1295	806	1473	1182	938	967	1578	1729	807	1054	1119	586	844	686	324	835	1669	2700	1067	1176	1374	1205	1222	742	1851	2213	932	941	770	1266	1687	1051	1095	1117	610	863	671	257	1131		1221	1649
52	1118	2206	1102	1568	1427	1109	1463	749	667	1523	978	927	928	1309	1899	879	1050	1122	663	838	601	443	1251	1314	2642	823	1349	1196	1277	1209	808	1774	1898	1071	971	1028	1781	1574	1093	1077	918	540	777	725	271	1121		1276	1687
53	1156	2371	906	1486	1626	1283	1496	1012	428	1398	1177	915	971	1375	1688	558	993	1135	515	929	685	386	1172	1566	2801	771	1290	1438	1118	822	927	1669	1661	1059	1060	1031	1381	1376	904	1112	949	786	695	594	224	1205		1089	1672
54	1099	2459	1031	1504	1577	1330	1189	894	724	1459	1051	964	969	1336	1434	780	863	1109	709	831	718	334	761	1445	3119	840	1191	1094	1162	944	729	1626	2942	1042	1022	865	1435	1527	954	1068	949	779	793	560	245	1187		1271	1730
55	1026	2256	1080	1475	1629	1380	1329	1272	659	1371	1292	801	943	1412	1663	752	979	1062	810	806	731	275	1201	1427	2842	1031	1183	1193	1317	1085	682	1818	1994	1120	897	1150	1435	1511	1038	1113	948	693	844	571	247	1179		898	1962
56	1034	2363	945	1308	1403	1227	1333	1136	645	1444	1183	1119	959	1470	1729	689	1052	1115	721	766	666	311	1106	1535	2844	1122	1280	1062	1375	874	754	1934	2207	1019	853	1155	1370	1520	1006	1109	883	917	765	497	322	1128		1205	1615
57	1246	2680	988	1442	1561	1114	1290	1046	608	1408	1080	945	1061	1715	1603	886	1042	1065	758	962	632	241	781	1475	2747	916	1236	1260	1299	1017	975	1858	2571	1057	1028	1060	1497	1643	864	1086	1094	736	832	699	302	832		1245	1724
58	1147	2339	1068	1515	1544	1226	1404	994	430	1504	994	1051	992	1400	1562	739	1010	1095	715	602	631	319	888	1325	2965	986	1364	1183	1171	740	780	1808	2201	1082	983	972	1325	1413	1086	1039	1049	760	615	584	289	899		1067	1810
59	1137	2091	965	1435	1641	1434	1213	956	773	1475	847	994	869	1297	1725	701	1079	1080	683	853	709	292	1154	1415	2784	917	1273	1393	1167	1007	805	1600	1724	964	870	1049	1423	1621	1059	1149	1161	674	667	647	246	793		1070	1864
60	1177	2044	1027	1540	1522	1349	1229	883	552	1527	1110	1031	1115	1452	1623	790	871	977	825	775	740	237	1151	1447	2846	856	1224	1223	1205	1050	922	1657	1978	1078	1060	927	1355	1734	866	1174	1114	564	730	513	305	707		1053	1756
61	1212	2413	1130	1395	1490	1306	1346	905	500	1300	1201	1032	862	1373	1586	743	979	1102	662	658	663	250	1143	1393	2896	1064	1211	1222	1286	1021	665	1734	2080	952	1063	1109	1365	1669	985	1099	1119	729	716	547	367	1152		1163	1680
62	1168	2318	973	1709	1589	1441	963	898	587	1519	1135	969	1061	1247	1571	820	1029	1059	847	744	547	312	1026	1286	3153	953	1451	1297	1279	812	867	1717	2112	978	981	1070	1411	1602	944	1135	1079	830	721	610	232	1108		1042	1602
63	1164	2324	981	1477	1115	1097	1007	903	409	1446	1193	1065	1088	1452	1689	708	1091	1052	749	753	621	375	1349	1304	2604	952	1237	1227	1343	876	867	1788	2710	865	963	977	1569	1393	1061	1173	1129	639	685	515	320	1031		1106	1708
64	1053	1880	1027	1464	1546	1175	964	998	629	1436	1135	976	1055	1566	1681	751	1128	965	661	784	632	274	1018	1395	2778	868	1408	1352	1161	1132	819	1755	2143	1190	818	1023	1451	1564	1098	1265	1068	737	804	545	346	932		1037	1868
65	941	2254	1036	1487	1543	1222	951	1016	604	1463	1215	961	1047	1263	1412	767	1018	959	671	700	686	311	1204	1439	2667	944	1466	1275	1169	1190	693	1591	1722	973	988	808	1436	1673	918	970	1129	672	690	589	245	1213		1199	1708
66	1223	2263	926	1428	1289	1291	891	818	594	1383	1277	957	946	1563	1467	779	819	1099	673	869	698	276	1239	1220	2785	1131	1499	1261	1180	1124	792	1759	1977	1045	955	935	1537	1615	913	1056	1139	766	728	665	334	1081		1081	1624
67	1156	2047	946	1449	1622	1388	925	855	515	1477	886	934	951	1402	1451	790	991	1108	757	806	609	189	1259	1353	2886	982	1349	1253	1273	1122	727	1815	1825	1099	873	897	1441	1674	1005	1047	1067	794	776	556	285	1192		1067	1650
68	1204	2076	955	1574	1313	1262	1042	985	633	1467	1103	844	913	1334	1660	869	966	1036	785	720	616	300	1101	1364	3055	853	1459	1395	1210	914	718	1686	2538	1131	990	938	1395	1764	932	1133	1193	693	777	614	217	1212		1149	1791
69	1039	2130	923	1416	1496	1411	956	1012	403	1403	1223	745	990	1278	1316	771	994	1183	788	750	571	238	1370	1268	3071	825	1452	1471	1260	1004	721	1690	2038	978	773	871	1827	1634	1075	1001	1105	638	911	615	147	1138		1036	1584
70	1141	2010	1055	1455	1367	1246	1065	1112	564	1431	1195	930	1097	1282	1820	677	974	1079	651	776	595	356	1064	1348	2151	977	1447	1533	1151	902	899	1774	1934	1101	1136	1070	1485	1408	963	1192	1092	743	834	594	294	1241		1090	1801
71	1221	2070	989	1458	1506	1237	890	959	545	1400	1088	1056	978	1377	1716	738	911	989	754	881	654	366	1050	1565	2503	957	1174	1361	1209	903	694	1627	2586	1030	1013	1020	1726	1677	1112	1181	1196	854	819	648	273	1254		1081	1578
72	1097	2093	966	1543	1633	1264	835	981	510	1494	994	760	1055	1513	1516	692	1044	1062	781	644	640	238	983	1376	2686	942	1383	1317	1108	1082	855	1690	2665	1205	876	851	1397	1561	927	1121	1054	566	661	460	323	1205		988	1585
73	1084	2119	947	1467	1395	1242	984	1047	572	1426	1103	780	930	1382	1493	667	997	1057	732	774	532	355	890	1431	2878	1050	1345	1156	1218	848	746	1840	1945	1081	978	990	1789	1695	911	895	1215	628	663	521	271	1176		1037	1686
74	1180	2057	996	1533	1303	1138	1018	833	524	1507	853	677	905	1308	1349	927	841	1073	759	884	742	211	985	1362	2763	951	1481	1480	1117	954	771	1658	2552	1057	931	991	1351	1656	970	1138	1063	646	808	588	309	1230		1064	1756
75	1137	2005	1038	1551	1297	1154	925	793	626	1364	1067	810	1032	1320	1817	786	936	1120	743	868	860	278	1334	1289	2600	979	1567	1225	1218	932	827	1676	2169	1044	1038	919	1289	1741	970	1151	1022	649	754	621	231	1100		1084	1603
76	922	2061	1115	1454	1247	1234	738	880	553	1568	1054	1040	999	1460	1418	767	1058	1148	693	866	707	191	1211	1313	2625	965	1386	1165	1155	884	815	1615	2017	890	881	1062	1336	1605	876	1119	1138	793	831	658	318	1191		1085	1465
77	1078	1944	843	1478	1231	1254	938	950	647	1565	966	1030	942	1282	1597	863	967	974	941	814	765	434	958	1366	2483	929	1502	1183	1283	761	990	1828	2613	1060	910	956	1257	1246	1008	1174	1156	796	902	534	314	1082		970	1604
78	1211	2445	962	1368	1587	1161	807	881	476	1403	981	947	925	1241	1714	774	1006	1038	725	817	689	339	1169	1403	2644	822	1498	1017	1043	907	736	1771	2636	1187	1166	853	1171	1582	944	1017	1137	691	796	608	288	1185		892	1659
79	1108	2245	1123	1528	1215	1169	897	891	467	1280	1096	994	996	1231	1549	690	980	1014	619	901	759	249	1246	1355	2859	1066	1445	1265	1337	888	828	1665	2159	808	1066	1029	1236	1348	1044	1084	1045	700	812	580	260	1238		1016	1704
80	1202	2323	1059	1466	1630	1272	914	565	591	1242	1066	880	1066	1534	1603	803	945	977	717	667	669	232	1127	1369	2700	972	1410	1344	1153	869	798	1618	2649	1065	662	968	1314	1722	989	1069	1050	631	816	636	308	1164		941	1764
81	910	2299	939	1441	1196	1167	787	872	517	1377	1167	960	1071	1325	1382	951	1018	1126	737	760	670	382	869	1368	2789	1019	1394	1212	1339	798	850	1912	2799	980	982	894	1590	1788	1004	1203	1083	661	666	661	321	1225		1129	1543
82	1092	2234	931	1664	1485	1241	971	858	657	1321	1182	1076	993	1242	1881	741	1016	1104	904	849	640	253	1099	1342	2503	908	1392	1276	1186	875	866	1645	2838	1010	878	871	1292	1608	947	1063	1138	783	765	439	176	1257		1145	1533
83	1109	2321	1086	1561	1239	1201	945	1171	591	1217	1011	989	1039	1593	1576	641	1153	1167	776	850	554	286	896	1385	2333	872	1483	1485	1218	847	625	1605	2920	1064	1011	914	1503	1541	1059	1119	1085	683	831	599	250	1301		1182	1580
84	1121	2274	845	1252	1235	1386	847	949	566	1325	1077	1009	938	1516	1630	666	905	950	648	845	740	207	1200	1400	2238	762	1430	1269	1106	1177	784	1667	2990	972	1049	1132	1320	1645	1031	1098	1055	691	693	583	291	1221		1138	1500
85	1115	2472	933	1566	1432	1437	957	926	670	1121	764	959	940	1261	1668	667	1023	991	863	890	676	248	1228	1285	2949	827	1325	1140	1119	991	739	1600	2248	809	918	1089	1441	1628	977	1138	1056	724	839	619	291	1430		979	1680
86	986	2223	1013	1560	1216	1268	898	1032	635	1470	1146	911	955	1554	1360	782	1049	869	748	887	542	307	1234	1291	2867	1004	1179	1186	1130	871	912	1621	2924	1241	952	1008	1388	1539	930	925	1158	690	668	656	284	1147		1150	1602
87	1156	2337	977	1724	1184	1307	1034	857	565	1380	1094	938	997	1371	1706	611	1079	1122	672	890	694	345	1149	1343	2489	1034	1228	1399	1129	1042	715	1797	1814	922	1031	948	1405	1630	929	1244	1044	801	824	673	316	1209		1075	1554
88	1347	2177	1031	1566	1379	1294	1086	998	664	1355	949	734	1044	1251	1618	736	1076	1073	750	791	649	344	1138	1304	2230	1016	1326	1139	1068	962	836	1480	3029	1027	960	910	1290	1766	902	1041	1123	585	931	522	298	1158		984	1686
89	1202	2140	1030	1445	1323	1355	895	1109	502	1144	1132	1002	972	1552	1497	773	868	1119	760	828	606	302	1175	1242	2440	905	1457	1381	1198	992	831	1544	2319	1023	1082	1025	1304	1574	1147	948	988	670	755	686	280	1104		989	1555
90	1123	2062	913	1786	1382	1155	965	1175	708	1187	995	974	832	1371	1731	790	922	1016	890	820	581	323	1221	1219	2627	975	1430	1355	1062	1043	891	1359	2239	1220	784	1036	1405	1423	802	999	1085	696	840	587	233	1216		1252	1604
91	1159	2361	958	1457	1264	1101	933	923	576	1246	1017	1203	1019	1327	1622	852	1033	1017	605	661	668	257	1200	1387	2547	1070	1411	1018	1383	960	806	1328	2814	1061	792	1071	1329	1529	857	1033	1142	760	820	613	330	1168		1058	1575
92	1079	2221	929	1501	1425	1409	948	1017	609	1315	920	959	1013	1242	1451	687	915	1000	861	883	619	230	1114	1357	2716	870	1166	1251	1065	969	866	1265	2810	1098	849	1042	1347	1505	992	1078	1021	716	738	596	251	1178		1126	1777
93	1090	2241	961	1525	1347	1321	1076	982	681	1326	1053	1054	842	1445	1674	766	955	1108	736	911	697	275	1096	1265	2310	792	1269	1241	1147	858	756	1354	2864	1101	1069	1002	1315	1534	938	984	1286	754	823	565	237	1194		1233	1746
94	1182	2257	947	1680	1219	1422	879	1121	874	1270	1218	1014	1065	1320	1488	751	1117	1093	844	933	687	228	955	1340	2151	851	1496	1248	1132	1077	992	1302	2775	1041	958	1077	1324	1466	906	1201	928	837	739	571	244	1154		1021	1804
95	1226	2267	954	1415	1436	1357	928	949	852	1221	1019	1000	974	1240	1829	707	1050	961	657	819	611	399	1108	1325	2218	988	1311	1327	1128	959	849	1214	2988	932	1153	908	1472	1462	1015	984	1060	512	834	489	215	1175		966	1531
96	1154	2151	884	1557	1337	1288	1074	1013	530	1384	932	1045	898	1418	1505	824	980	995	691	846	732	433	1273	1139	2182	882	1268	1308	1236	970	921	1045	1929	858	1021	988	1414	1551	985	1005	1158	818	900	592	323	1282		1218	1665
97	1298	2243	1035	1644	1343	1308	891	937	964	1267	1278	1245	978	1338	1273	875	964	926	561	885	634	302	1324	1435	1686	808	1291	1119	1222	828	728	1173	1928	1094	733	1123	1409	1429	971	983	1113	482	841	586	347	1130		901	1659
98	1180	2323	862	1556	1239	1240	1091	958	808	1160	1032	1048	1017	1510	1567	765	941	951	768	822	687	147	1259	1274	1453	876	1299	1334	1109	1066	586	1056	2637	1079	963	909	1883	1573	971	1100	1001	979	786	599	232	1174		1043	1609
99	1147	2275	953	1532	1383	1237	1100	1065	804	1243	1185	874	850	1270	1306	717	1041	1003	769	626	657	359	1180	1167	1765	938	1360	1259	1090	823	798	1223	2734	1030	969	1061	1596	1382	942	1050	1143	759	815	580	326	1191		1116	1792
100	1080	2353	988	1564	1334	1123	933	995	703	1215	1102	1013	958	1356	1719	857	942	1023	783	712	591	425	1116	1295	1345	918	1365	1148	1225	862	865	1142	2884	1246	929	885	1433	1721	1028	1090	1089	653	925	604	257	1103		1078	1459
101	1075	2238	924	1584	1458	1215	1074	879	692	1156	1078	1050	966	1309	1735	794	1022	1122	829	757	743	367	1188	1408	1433	998	1317	1259	1097	857	813	1206	2794	1000	717	886	1334	1483	927	1202	1097	676	896	655	316	1241		1162	1642
102	1147	2244	838	1403	1474	1338	851	967	641	1355	1025	985	909	1405	1765	703	1059	858	609	857	694	318	1222	1278	1390	871	1357	1193	1306	916	844	1107	2684	1096	898	943	1417	1716	865	1072	1034	812	735	542	333	1127		1013	1627
103	1159	2352	946	1424	1342	1227	1127	1030	699	1192	1119	1074	873	1534	1762	717	960	1071	785	781	646	353	1087	1240	1549	754	1566	950	1140	1032	879	1239	1814	1063	970	942	1510	1625	846	975	1316	709	757	603	240	1178		1002	1746
104	1075	2311	880	1560	1580	1300	946	918	696	1229	1127	934	1060	1270	1879	673	1039	999	643	617	559	220	1147	1338	1408	943	1457	1322	1106	947	988	1119	2730	958	988	983	1250	1616	925	1162	1136	580	933	600	330	1109		1163	1824
105	1152	2174	1044	1485	1311	1136	970	996	829	1353	1085	1046	987	1249	1732	865	981	827	822	892	643	305	1123	1274	1417	978	1259	1394	1139	904	841	1102	2145	1025	951	844	1376	1433	963	951	1299	704	635	673	336	1267		1083	1549
106	1014	2135	880	1434	1329	1309	973	763	782	1092	1245	968	869	1256	1611	749	1009	1106	768	849	671	327	1134	1320	1291	871	1366	1273	979	789	1028	1152	2176	1048	1029	1014	1051	1465	951	947	1246	612	739	635	372	1270		997	1741
107	1139	2286	1095	1443	1360	1406	1020	834	655	1349	1063	1006	902	1472	1636	733	844	943	815	840	681	346	1192	1207	1356	965	1384	1339	1183	847	1061	1206	1779	1024	852	918	1400	1720	992	1121	1210	715	732	626	315	1267		1051	1648
108	1183	2297	1108	1633	1304	1300	1011	966	669	1247	1030	1008	982	1470	1808	695	843	989	1049	784	525	297	1174	1335	1451	966	1332	1250	1033	937	1029	1244	2407	1071	912	747	1276	1731	842	1125	1162	629	601	563	250	1195		1100	1694
109	1229	2278	1001	1423	1406	1130	1113	889	963	1213	991	890	872	1344	1447	889	904	974	958	774	656	377	1178	1206	1388	1027	1388	1268	1187	770	923	1186	2409	958	1022	1022	1505	1541	999	1085	1280	662	816	477	306	1110		1036	1697
110	1156	2407	1069	1621	1539	1340	899	1034	716	1338	940	908	978	1348	1462	710	1002	1070	1259	716	547	328	1141	1448	1331	902	1543	1250	1150	943	1020	1228	2343	1150	901	1162	1259	1774	903	1051	1364	597	676	630	267	1182		1004	1905
111	1174	2443	1297	1606	1399	1401	1174	1043	564	1240	996	955	1027	1361	1317	853	835	1002	1444	804	539	385	1268	1380	1295	978	1527	1308	1091	932	1387	1028	2462	1061	975	952	1535	1756	958	1098	1070	844	703	661	315	1172		1050	1829
112	1165	2345	1559	1476	1803	1616	1292	1234	803	1318	930	955	838	1208	1414	870	1133	933	1864	870	606	314	1283	1399	1424	987	1443	1273	1179	812	1399	1136	1775	1001	922	1021	1398	1928	862	988	1255	688	779	505	310	1211		1058	2174
113	1175	2457	1856	1454	1455	1649	1534	1295	612	1184	1148	1013	911	1715	1222	719	997	1029	1891	929	621	345	1524	1370	1780	869	1322	1332	1389	730	1815	979	2345	984	915	957	1441	1556	1053	1147	1242	757	723	547	257	1175		1209	2036
114	1047	2675	1990	1503	1433	2087	1716	1255	762	1454	1008	1045	831	1454	1531	880	1041	1063	1930	1132	779	392	1894	1532	1697	941	1293	1198	1577	991	2092	1295	2443	975	879	1087	1562	1661	829	983	1144	887	718	690	269	1156		1048	2242
115	1138	2982	2024	1577	1542	2246	1703	1438	714	1333	1044	903	966	1266	1391	723	921	945	2069	1739	666	340	2338	1514	2372	968	1428	1352	1941	991	2008	1117	2301	1141	891	1005	1372	1750	883	996	1110	1099	713	732	377	1176		1237	2342
116	1072	3060	2237	1558	1513	2864	1858	1315	860	1379	1264	905	906	1389	1724	732	1034	1135	2239	1964	884	307	2713	1545	1956	986	1356	1298	2272	1067	2097	1261	2442	971	878	901	1736	1716	873	1345	1339	1247	810	657	174	1256		1187	2210
117	1075	3207	2253	1567	1757	2484	2219	1585	1111	1387	1286	825	914	1367	1860	798	1020	1078	2241	2009	1009	505	2726	1729	2694	992	1416	1242	2224	1005	2523	1198	1786	963	896	894	1404	1737	786	1067	1324	1653	832	732	215	1197		1155	2379
118	1110	3563	2376	1418	1966	2775	1762	1628	1468	1284	1447	1055	920	1330	1790	800	893	1102	2165	2041	1226	433	2721	1858	2473	1012	1571	1146	2331	920	2176	1213	2527	1219	815	898	1525	1682	979	1082	1214	1931	922	764	246	1268		1425	2269
119	1259	3548	2435	1436	2382	3087	2320	1757	1527	1333	1667	949	1003	1338	1922	830	800	1138	2282	2166	1356	562	2950	1850	3145	1296	1460	1355	2479	1074	2355	1403	2409	1079	972	1082	1365	1461	978	951	1365	2074	902	997	485	1264		1171	2492
120	1320	3614	2359	1297	2103	2938	2240	1760	1473	1500	1588	1019	1023	1356	1988	699	1089	1209	2066	2159	1487	584	2895	1899	2919	1427	1541	1334	2511	1142	2397	1330	1859	1121	891	1005	1397	1622	828	981	1273	2087	819	1133	465	1602		1179	2607
121	1449	4031	2230	1503	1222	3085	2081	1787	1544	1641	1788	1065	1002	1428	2299	792	997	1467	2370	2344	1498	639	3026	1830	3719	1527	1385	1411	2531	1157	2363	1216	2430	1254	903	1049	1483	1778	846	1098	1353	1945	985	1192	562	1924		1149	2514
122	1542	4059	2321	1428	2085	3270	2554	1934	1822	1719	1883	699	1063	1508	2197	716	1184	1818	2391	2272	1623	554	2983	1766	4449	1614	1480	1623	2661	1239	2439	1420	1841	1194	1019	1161	1312	1772	966	1120	1337	2057	1078	1396	734	2270		1300	2346
123	1337	4360	2197	1530	1183	2987	2433	1993	1749	1667	1856	1065	1127	1700	2239	666	1445	1836	2022	2113	1644	620	3001	1969	3761	1694	1807	1639	2324	1382	2190	1408	2357	1481	1071	958	1434	1895	965	1075	1253	2180	1432	1524	560	2766		1213	2447
124	1634	3845	2370	1505	1247	2855	2240	1748	2055	1725	2009	1099	934	1735	2283	807	1377	1745	2376	2194	1458	487	2946	1785	2722	1728	1719	2003	2576	1242	2338	1478	2410	1681	947	1154	1681	1636	969	1233	1359	2051	1661	1500	587	2632		1246	2350
125	1346	4531	2166	1392	1158	2571	2233	1753	1932	1707	1864	1053	1000	2215	2574	873	1484	1937	2194	2028	1561	742	2953	1882	2803	1753	1779	2268	2403	1380	2335	1507	2456	1846	914	966	1563	2002	897	1329	1387	2173	1980	1301	476	2767		1264	2311
126	1603	4033	2396	1803	904	2992	2161	1741	1826	1737	1892	1222	1035	2317	2587	768	1483	2098	2358	2221	1560	630	3153	1737	3465	1696	1606	2468	2431	1378	2334	1732	2512	1710	719	1097	1571	2141	1005	1503	1512	1978	2001	1502	687	2902		1248	2400
127	1680	4515	2353	1593	1103	3130	2454	1886	1884	1736	1743	1293	925	2552	2745	782	1436	1947	2297	2048	1791	577	2766	1640	3949	1744	1936	2807	2356	1572	2254	1880	2397	1977	1069	1050	1538	1978	1002	1551	1931	2106	2071	1670	494	2910		1216	2472
128	1772	3966	2238	1584	988	3381	2246	1993	1788	1874	1795	1429	1102	2423	2621	948	1509	2129	2339	2027	1490	592	2914	1882	3356	1733	1815	2548	3079	1613	1863	2021	2196	1990	1154	978	1993	2384	965	1752	1840	1957	2087	1457	649	2929		1176	2369
129	1654	4332	2457	1528	1027	3169	2311	2062	2110	1736	2011	1324	980	2986	2904	916	1400	2182	2085	2248	1746	626	2785	1717	2398	1932	1590	2439	2917	1523	1892	1975	2091	2045	1097	982	2224	2450	1103	1916	1799	2157	2005	1545	601	2758		1244	2438
130	1870	4339	2330	1586	1203	3284	2193	1973	1883	1974	2057	1350	1029	2636	2401	899	1407	2064	1944	2471	1811	594	2903	1642	3832	2011	1560	2547	2816	1714	2001	2161	2342	1899	1270	1118	2374	2546	1087	1840	1941	2100	2063	1647	457	2647		1291	2311
131	1677	4372	2396	1682	1082	3266	2492	2028	1809	1736	2053	1064	1085	2882	2568	844	1385	2069	2265	2331	1591	540	2815	1659	2593	1719	1540	2699	3035	1620	1797	2420	2073	1758	1250	965	2527	2461	1082	1662	2186	2165	2078	1566	583	2736		1220	2455
132	1855	4267	2337	1597	1019	3095	2409	2070	1842	1976	2124	1421	1066	3029	2691	856	1622	2236	2095	2361	1607	589	2893	1745	2651	1792	1777	2746	2917	1702	1927	2343	1974	1864	1238	1103	2606	2368	1256	1852	2205	2086	2054	1590	667	2807		1302	2220
133	1793	4382	2227	1719	920	3139	2455	2215	1773	1905	2125	1309	1250	3049	2764	810	1518	2088	2148	2653	1649	571	3103	1590	2782	1981	1787	2552	2926	1520	1912	2414	1356	1913	1138	999	2813	2338	1044	1669	2270	2171	2017	1558	625	2934		1274	2283
134	1661	4429	2178	1481	941	3204	2340	2067	1723	1895	2125	1581	1302	2792	2786	858	1543	2143	2296	2186	1510	735	2943	1752	3138	1864	1655	2680	2789	1797	1838	2279	2032	1925	1185	935	2846	2137	1029	1687	2227	2200	2001	1411	601	2680		1185	2382
135	1810	4000	2288	1593	981	3216	2431	2321	1821	1881	2147	1568	1257	2880	2807	886	1566	2244	2162	2230	1878	621	2724	1798	2848	1812	1645	2848	2757	1666	2484	1517	2090	1837	1163	1064	2802	2261	959	1853	2438	2180	1930	1395	690	2541		1179	2441
136	1850	3841	2413	1628	1026	3244	2137	2291	2013	2040	1942	1801	1420	2937	2349	803	1536	2316	2057	2465	1538	591	2670	1783	3202	1768	1752	2877	2589	1691	2341	1493	2021	1793	1164	1178	2928	2408	1159	1638	2371	2175	2114	1615	639	2925		1296	2375
137	1821	4581	2254	1727	1036	3185	2394	2020	2109	1957	2076	1563	1524	2995	2548	957	1370	2336	2041	2217	1588	591	2725	1850	2416	1924	1657	2631	2880	1740	2507	1745	2834	1945	1131	1150	2949	2177	1106	1812	2547	2315	2162	1714	624	2905		1265	2440
138	1631	4176	2213	1584	966	3065	2313	2096	2083	1963	2042	1467	1402	2808	2427	866	1570	2412	2261	2309	1538	623	2788	1671	3459	1787	1706	2600	2865	1658	2513	1979	1760	1785	1174	1181	3008	2228	1282	1762	2518	2164	2145	1622	677	2777		1144	2105
139	1784	4080	2275	1971	1067	3137	2320	2012	2070	1894	1991	1222	1420	3088	2643	915	1421	2561	2129	2116	1593	641	2513	1700	2029	1971	1701	2643	2600	1526	2613	1756	1740	1765	1170	1190	2881	2155	1038	1865	2374	2261	2081	1551	520	2694		1202	2243
140	1894	4173	2291	1451	995	3079	2440	2131	1816	1909	1908	1585	1582	2947	2504	818	1570	2689	2162	2304	1604	716	2574	1706	2233	1869	1777	2652	2576	1584	2529	1871	1230	1801	1228	1180	2692	2380	1222	1707	2486	2059	1903	1542	562	2696		1181	2376
141	1705	4121	2379	1707	970	3249	2529	2250	2088	1916	2086	1536	1455	2902	2413	968	1402	2633	2076	2018	1437	606	2672	1647	2471	1717	1686	2675	2478	1650	2514	2056	1183	1862	1237	1415	2917	2056	913	1729	2549	1898	2053	1527	655	2784		1242	2418
142	1865	3935	2279	1798	923	3202	2323	2394	2057	1957	2134	1505	1627	3161	2211	1000	1521	2647	2165	697	1438	587	2492	1548	2520	1766	1721	2620	2729	1587	2613	2010	1168	1811	1261	1436	2740	2198	919	1732	2627	2195	2085	1709	506	2676		1208	2503
143	1888	4011	2436	1673	820	3364	2228	2181	2090	2028	2116	1468	1317	2906	2662	988	1290	2590	1978	761	1614	594	2451	1684	2619	1588	1824	2677	2577	1523	2391	1190	1112	1845	1392	1299	2900	2113	1172	1699	2429	2096	1871	1654	595	2771		1105	2430
144	1941	4194	2358	1842	1044	2923	2291	2297	1998	1853	1926	1669	1603	2627	2704	1001	1521	2802	1979	629	1363	649	2544	1947	2563	1689	1853	3014	2492	1522	2414	1747	1292	1902	1261	1294	3055	2144	908	1746	2305	2005	1823	1451	555	2724		1275	2329
145	1764	4202	2209	1767	2135	3147	2544	2107	1892	2027	2319	1500	1566	2853	2533	909	1478	2614	2210	827	1470	663	2604	1836	2030	1622	1638	2827	2600	1616	2404	1556	1110	1737	1263	1554	2977	2134	1134	1635	2263	1901	1866	1649	629	2948		1186	2570
146	1908	4381	2359	1608	2759	3189	2486	2354	2138	2003	2078	1577	1188	2913	2635	1012	1499	2761	2291	674	1569	677	2777	1939	2004	1559	1676	2484	2667	1495	2538	1634	1109	1902	1138	1547	2879	2136	1050	1674	2069	2104	1912	1528	495	2782		1267	2244
147	1691	4414	2266	1816	2818	3048	2328	2141	2261	1933	1950	1548	1343	2560	2470	878	1397	2500	2259	866	1653	585	2732	1744	2862	1685	1494	2710	2826	1593	2764	1890	1934	1626	1211	1599	2837	2135	956	1723	2247	1902	1859	1420	631	2695		1401	2390
148	1978	4170	2365	1646	3589	3290	2436	2420	2023	1787	2263	1515	1312	2969	2520	1044	1376	2755	2245	771	1721	538	2696	1893	2832	1563	1666	2657	2834	1336	2223	1892	1129	1776	1134	1479	2935	1976	993	1629	2197	2205	1739	1656	577	2623		1157	2206
149	1823	4351	2357	1768	1923	3124	2310	2324	2197	2014	2098	1369	1437	2921	2759	1022	1548	2594	2180	668	1525	639	2580	1830	1933	1612	1746	2872	2518	1580	2041	1790	1030	1615	1127	1346	2782	1872	1043	1772	2011	1993	1755	1588	564	2795		1264	2318
150	1874	3480	2184	1687	3437	3240	2124	2361	2091	1798	1919	1558	1410	2786	2176	981	1302	2279	2100	801	1585	649	2610	1634	2578	1654	1686	2392	2285	1390	1831	1948	1192	1703	1132	1334	2853	2030	1113	1752	2320	2026	1638	1543	582	2720		1219	2391
151	1907	3528	2325	1621	3702	3149	2435	2550	2283	2122	2106	1516	1303	2734	2361	933	1542	2491	2206	735	1610	510	2583	1692	2794	1621	1782	2653	2348	1552	1854	1960	1007	1676	1153	1381	3121	1954	1113	1602	2190	2075	1645	1393	500	2398		1224	2265
152	1830	3342	2138	1781	2657	3029	2265	2203	2155	1861	2023	1506	1378	2607	2645	817	1493	2443	2242	571	1481	637	2678	1814	2892	1623	1609	2439	2389	1393	1702	2040	915	1710	1109	1381	2905	1887	911	1672	2129	2078	1497	1492	518	2591		1335	2332
153	1725	4544	2219	1633	3338	3062	2367	2268	2234	1932	2065	1255	1274	2871	2551	1029	1391	2373	2145	762	1317	624	2573	1789	2622	1651	1389	2792	2564	1472	2162	1954	1073	1494	1285	1350	2744	2101	965	1808	2140	1972	1571	1411	582	2709		1259	2409
154	1749	4252	2252	1856	3592	3106	2561	2336	2154	1796	2095	1531	1390	2679	2622	858	1444	2308	2286	782	1565	578	2785	1666	2782	1594	1847	2575	2804	1364	2036	1904	1164	1774	1235	1264	2802	1843	914	1708	2162	1801	1497	1587	531	2713		1351	2288
155	1795	3567	2294	1785	2511	3063	2508	2290	2403	1736	2051	1460	1262	2732	2421	1005	1270	2453	2147	767	1465	580	2677	1889	2594	1486	1797	2698	2570	1235	2367	2026	1265	1543	1104	1394	2791	1882	950	1565	2140	1980	1356	1531	517	3097		1345	2370
156	1570	3625	2288	1625	3313	3279	2408	1989	2373	1987	1905	1571	1383	2690	2825	906	1444	2206	2129	702	1484	637	2632	1649	2502	1615	1660	2406	2185	1370	1941	1707	1354	1653	1074	1398	2785	1707	1073	1678	2222	1947	1429	1569	528	2516		1409	2169
157	1760	3488	2189	1654	2542	3271	2415	2401	2254	1920	1737	1486	1270	2655	2626	840	1414	2126	2246	710	1568	528	2541	1739	3039	1583	1746	2562	2628	1377	1597	1797	1100	1591	1010	1419	2623	2173	1065	1694	2069	2020	1497	1636	625	2600		1370	2350
158	1705	4440	2319	1797	3281	3087	2414	2415	2505	1754	1941	1217	1367	2747	2320	921	1344	1956	1917	874	1597	610	2591	1724	3373	1551	1759	2625	1788	1324	2280	2015	1535	1504	959	1174	2498	1609	1036	1608	2132	1962	1345	1396	467	2907		1416	2367
159	1713	3548	2395	1690	3385	3027	2367	2388	2178	1870	1965	1403	1310	2758	2219	921	1262	2224	2128	657	1508	579	2522	1705	3302	1544	1712	2313	2381	1296	2359	2150	1099	1747	964	1283	2345	1984	938	1751	2017	1949	1463	1490	597	2591		1220	2391
160	1678	3483	2357	1589	3139	3130	2398	2366	2348	1820	2073	1564	1139	2697	2850	1092	1202	2130	2251	2117	1530	671	2690	1689	3587	1363	1867	2483	2271	1489	2116	2018	955	1530	1031	1317	2506	1876	943	1633	2063	1990	1401	1455	504	2603		1212	2300
161	1735	3396	2223	1549	3370	3187	2352	2586	2465	1885	2182	1477	1361	2528	2625	892	1299	2252	2103	2017	1401	606	2536	1622	3334	1276	1862	2404	2188	1417	1531	1986	1010	1403	978	1313	2364	1898	979	1807	1992	2075	1297	1585	392	2733		1230	2486
162	1656	4392	2371	1595	3160	3286	2309	2204	2332	1954	2010	1376	1195	2393	2210	957	1268	2027	2240	2084	1445	611	2633	1560	3516	1442	1810	2266	1952	1256	1530	1906	967	1676	935	1254	2455	1644	978	1691	2215	2096	1380	1466	554	2627		1199	2564
163	1716	3540	2442	1575	3199	3153	2259	1931	2512	2039	1998	1594	1212	2757	2423	1019	1381	2135	2181	2024	1272	475	2860	1680	3479	1427	1841	2243	2005	1292	1984	2067	1093	1362	1186	1274	2464	1410	829	1486	2044	1904	1300	1529	596	2767		1179	2225
164	1637	3587	2282	1630	2627	3152	2195	2667	2463	1843	1822	1260	1259	2624	2537	899	1221	2152	2087	2123	1292	572	2593	1513	3555	1338	1837	2295	2758	1194	840	1860	988	1454	1154	1220	2150	1841	915	1506	1362	1695	1286	1527	568	2645		1143	2435
165	1486	3506	2331	1645	2585	3086	2220	2322	2496	2031	1874	1397	1189	2745	2699	1028	1251	1869	2104	2078	1389	621	2881	1552	3466	1325	1919	2121	2718	1134	822	1872	1055	1394	859	1209	2122	1738	981	1518	1516	1843	1242	1314	488	2857		1477	2344
166	1591	3488	2160	1601	3237	3196	2396	2147	2533	1842	2039	1523	1068	2463	2486	1039	1200	1969	2072	2150	1437	602	2833	1530	2977	1292	1855	2033	2500	1192	1206	1832	1106	1466	1001	1213	2205	1734	864	1704	1197	1946	1103	1525	466	2658		1425	2356
167	1499	3632	2347	1541	2462	2930	2378	2157	2243	1704	2059	1416	1196	2408	2517	828	1171	2083	2084	2154	1312	711	2894	1529	3007	1479	1854	2262	2420	1165	1259	1667	1558	1243	1029	1409	2159	1728	1012	1363	1313	1842	1246	1329	395	2707		1538	2431
168	1483	3450	2390	1520	3122	3246	2377	2225	2372	1890	2030	1292	1275	2445	2583	958	1222	2174	2182	2229	1410	585	2683	1640	2429	1237	1618	2024	2541	1251	1659	1496	1061	1395	1060	1191	2220	1689	913	1565	1509	1910	1185	1446	469	2525		1484	2521
169	1633	3616	2233	1723	3324	3081	2579	2247	2335	1896	1976	1514	1068	2413	2371	937	1362	1917	2189	1949	1261	532	2775	1517	1254	1389	1706	2184	2419	1255	1810	1776	1031	1186	950	1033	2114	1515	1088	1460	1141	1919	1240	1372	604	2714		1608	2235
170	1553	3573	2350	1385	3163	3117	2424	2207	2358	1787	1901	1685	1193	2599	2754	810	1250	1888	2039	2334	1384	692	2838	1531	1656	1220	1690	2153	2542	1202	1957	1706	1050	1127	949	1358	1961	1744	927	1398	1109	1935	1271	1449	485	2604		1646	2293
171	1609	3448	2115	1680	3265	3352	2296	2164	2231	1900	2074	1493	1137	2173	2126	968	1250	2009	2224	2597	1225	489	2791	1501	1849	1373	1862	1995	2360	1138	1675	1683	997	1140	966	1193	2149	1394	1041	1483	1298	1681	1098	1470	484	2667		1555	2531
172	1582	3639	2294	1440	3091	3003	2425	2281	2404	1646	1623	1161	1197	2517	2426	909	1184	2076	2148	2410	1198	646	2857	1736	1660	1294	1822	2059	2468	1261	1795	1615	1128	1304	898	1289	1922	1698	958	1486	1186	1803	1164	1323	566	2515		1664	2123
173	1347	3452	2255	1610	2456	3062	2175	2307	2295	1886	2107	1365	1135	2437	2577	900	1347	2023	2080	2187	1229	578	2714	1497	1840	1090	1872	1989	2428	1155	1703	1905	1540	1306	982	1255	1987	1763	940	1206	1166	1857	1095	1418	534	2374		1755	2352
174	1471	3520	2287	1432	3277	3013	2013	2287	2277	1859	2055	1273	1177	2555	2337	928	1424	2132	2116	2126	1113	606	2857	1421	1989	1205	1800	1972	2382	1101	1813	1828	1495	1314	967	1333	1804	1503	1019	1345	1224	1782	1170	1485	491	2316		1737	2472
175	1596	3514	2209	1394	3112	3135	2172	2138	2234	1789	1917	1603	1078	2403	2635	876	1419	2045	2121	2093	1035	427	2941	1460	2193	1053	1621	1899	2593	1164	1749	1702	1179	1278	930	1172	1887	1412	958	1369	1322	1722	1220	1507	494	2279		1522	2233
176	1564	3492	2266	1690	3094	3084	2054	2568	2226	1790	2037	1314	1041	2381	2613	815	1227	2065	2125	2178	1110	542	2950	1393	2247	1002	1570	1663	2468	1185	1806	1652	984	1179	867	1260	1975	1461	920	1525	1176	1920	992	1337	519	2317		1868	2329
177	1458	3329	2471	1420	2314	3178	2097	2529	2236	1810	1910	1490	1091	2252	2214	727	1108	2106	2183	2226	1161	624	2700	1673	2385	1156	1761	1911	2526	1019	1768	1658	844	1281	987	1188	2065	1729	1109	1653	1202	1600	937	1403	589	1989		1749	2538
178	1487	3449	2317	1606	2361	2584	2111	2333	2366	1782	1820	1413	1080	2301	2803	1032	1107	2186	2040	2333	1229	543	2906	1499	2505	1216	1707	1898	2238	1221	1779	1938	1144	1088	913	1209	2072	1787	1021	1551	1050	1835	1110	1378	376	2263		1758	2464
179	1482	3255	2226	1415	2240	3195	2210	2633	2248	1496	2001	1476	1054	2364	2636	1008	1195	1991	2176	2427	1065	718	2880	1666	2634	1186	1517	1622	2179	1004	1749	1905	1024	1303	1072	1174	1819	1634	1062	1537	1219	1836	912	1356	551	1931		1623	2262
180	1413	3164	2155	1584	2957	2638	2012	2577	2305	1488	2097	1436	1152	2289	2616	919	1156	2213	2147	2407	1049	488	2780	1377	2724	1196	1578	1760	2320	1095	1673	2146	1030	1039	845	1301	1705	1543	902	1665	1141	1718	1090	1305	538	2234		1657	2322
181	1510	3328	2247	1550	2039	2842	2230	2668	2069	1465	1808	1594	1099	2146	2979	1024	1199	2418	2179	2389	948	545	2859	1304	2948	997	1348	1706	2299	1022	1823	2383	1526	1193	1047	1149	1804	1533	959	1564	1564	1753	871	1314	513	2091		1598	2197
182	1506	3011	2468	1613	2451	3301	2015	2758	2132	1649	1997	1218	1203	2066	2787	916	1193	2238	2135	2288	1183	694	3160	1414	2699	1246	1610	1653	2169	985	1697	2059	1034	1164	833	1188	1882	1886	907	1567	1217	1945	969	1325	460	1973		1684	2379
183	1376	2335	2415	1487	3173	2506	1971	2133	2081	1555	2070	1300	1106	1997	2603	815	1140	2175	1986	2293	1071	613	2814	1372	2623	1154	1541	1662	2800	952	1982	2196	1223	1231	818	1165	1796	1527	875	1551	1229	1977	946	1224	507	2042		1677	2319
184	1448	2168	2215	1669	2344	3180	2151	1991	2187	1539	1957	1335	1094	1905	2192	768	1195	2013	2108	2434	1072	541	3089	1362	2748	877	1004	1502	2802	1123	1802	2328	1398	1164	1048	1275	1723	1590	1115	1632	1207	1820	938	1355	491	1929		1584	2273
185	1475	2510	2325	1367	2823	3270	2267	2116	2175	1702	1855	1583	1051	1813	2673	939	1147	2250	2234	2281	1055	470	2990	1392	2840	1069	1617	1720	2761	859	1811	2007	700	1086	881	1076	1680	1737	994	1710	1139	1888	935	1207	502	2049		1804	2308
186	1333	2227	2283	1532	2988	3229	2190	2187	2002	1463	2008	1427	1228	1893	2585	830	1144	2105	2035	2288	1061	628	2924	1551	2715	1221	1510	1872	2669	1132	1900	2189	995	1034	945	1182	1741	1656	974	1592	980	1927	884	1389	409	1982		1622	2474
187	1257	2170	2396	1591	2899	3196	1969	1977	2128	1576	1862	1344	1047	2067	2297	870	1119	2087	2264	2366	1060	598	2756	1321	2502	1171	1683	1581	2695	1065	1823	2282	982	1004	875	1152	1675	1607	928	1566	1159	1903	1088	1352	543	1930		1700	2699
188	1433	2153	2272	1578	2108	2461	2224	2344	2127	1671	1924	1396	933	1855	2723	889	1198	2091	2012	2597	967	496	2787	1398	2706	1184	1671	1619	2438	1024	1722	2057	939	1069	843	1076	1708	1679	907	1693	1097	2012	968	924	420	1834		1698	2394
189	1494	2128	2277	1408	2791	2527	2066	2171	2218	1546	2027	1374	1181	2059	2410	857	1227	2168	1986	2460	920	622	2780	1447	2573	1109	1524	1513	2507	1145	1731	2332	1079	1116	842	1054	1596	1671	920	1739	1055	1844	877	1422	524	1858		1749	2460
190	1332	2325	2295	1485	2171	3176	2308	2294	1888	1671	1768	1267	1104	2053	2396	901	1097	1957	2058	2084	729	508	2889	1494	2882	1120	1761	1688	2343	1070	1760	2158	1044	1097	994	928	1706	1589	1003	1694	944	2002	948	1420	593	1825		1807	2423
191	1392	2134	2220	1601	1965	2479	2220	2172	1854	2772	2098	1299	1233	1965	2484	726	1295	1996	1998	2482	949	642	2954	1314	2839	1076	1732	1629	2258	1031	1946	2058	1040	1184	1132	1286	1815	1476	1016	1467	1210	1922	796	1523	392	1792		1627	2730
192	1376	2040	2200	1499	2296	2512	1985	2330	1999	2579	1804	1273	1308	1978	2351	893	1153	1967	2173	2265	947	480	3196	1373	2727	1220	1566	1639	1953	1069	1905	2020	1159	1127	1090	1052	1797	1342	859	1701	1419	2080	927	1398	476	1873		1769	2358
193	1342	2166	2169	1326	2051	2563	2126	2157	1800	2669	1773	1386	1224	1937	2728	803	1105	2010	2226	2083	1025	484	2991	1505	2725	1194	1636	1552	2687	1046	1784	1886	1010	1081	832	997	1632	1466	959	1612	1264	1937	900	1362	461	1674		1584	2575
194	1308	2085	2171	1543	2592	2415	1846	2558	1729	2780	1783	1349	1140	1816	2343	833	1131	1948	2419	2488	900	758	2914	1410	2562	1206	1443	1684	1910	926	1792	2070	1018	1037	1051	1032	1642	1607	933	1535	1228	2000	857	915	446	1792		1517	2521
195	1393	1980	2309	1703	2504	2520	1795	2382	1813	2522	1741	1302	938	1877	2328	852	1138	1975	2068	2298	855	559	2888	1294	2445	1126	1571	1528	2142	1056	1651	1487	1080	1103	824	1233	2020	1579	1094	1782	1454	1972	880	1308	474	1523		1800	2279
196	1283	2180	2228	1540	2518	2395	2017	2432	1885	2773	1903	1282	1236	1907	2322	871	1132	1821	1941	2129	952	577	2988	1302	2535	1082	1421	1466	3181	1017	1648	1577	1048	1241	1008	1068	1462	1675	1004	1559	1153	1909	876	915	486	1635		1719	2530
197	1225	2257	2337	1507	2537	2533	2003	2546	1854	2613	1785	1157	1241	1782	2438	861	1052	1865	2111	2183	1065	640	2900	1425	2372	1188	1319	1473	2753	1079	1813	1790	909	1006	930	1132	1479	1615	877	1784	1465	1975	903	1296	494	1701		1701	2598
198	1498	1964	2126	1562	2623	2267	1934	2360	1828	2721	1715	1394	1174	1842	2620	699	1150	1751	2002	1647	1030	632	2879	1219	2276	1123	1622	1549	3373	988	1753	1703	1036	1006	766	1173	1665	1224	1004	1700	1663	1831	706	1275	417	1662		1780	2395
199	1423	1866	2255	1633	2549	2437	1981	2357	1881	2681	1714	1290	1149	1594	2180	956	1203	1611	2050	1574	1018	627	2950	1268	2818	1082	1888	1519	3269	1028	1767	1480	1503	1093	819	1177	1643	1623	901	1654	1489	1973	756	923	582	1760		1583	2594
200	1312	2032	2025	1466	2425	2416	2039	2408	1978	2578	1752	1068	1135	1656	2269	730	1138	1787	2001	2132	951	625	2835	1198	3130	1223	1438	1337	3412	988	1620	1372	1642	1175	962	1071	1516	1449	964	1635	1388	1780	948	1378	573	1556		1709	2485
201	1213	2183	1887	1494	2296	2511	1919	2375	1781	2613	1624	1386	1092	1624	2254	738	1252	1996	2035	2234	1000	575	2925	1290	3317	1042	1664	1322	3144	1190	1448	1451	1565	1129	1115	1126	1345	1601	904	1831	1408	1918	834	925	441	1613		1526	2380
202	1374	2094	1897	1567	2375	2418	1956	2381	1808	2531	1753	1379	1148	1746	2617	695	1016	1869	2195	1727	940	567	2792	1292	3308	1063	1593	1477	2914	996	1398	1199	1050	991	846	1169	1415	1639	920	1569	1212	1979	725	1360	447	1501		1628	2422
203	1221	2012	1993	1540	2231	2253	2005	2380	1754	2696	1629	1272	1105	1621	2662	931	957	1791	2200	1680	1009	606	2673	1185	3242	1202	1493	1421	3312	993	1254	1366	963	1119	964	1081	1502	1711	925	1748	996	2062	754	1088	440	1371		1604	2511
204	1374	2013	1994	1650	2480	2454	1997	2410	1713	2508	1734	1093	1114	1597	2337	866	1071	1727	2028	2085	934	684	2985	1097	3380	1117	1461	1357	2923	957	1216	1273	1247	1100	972	1161	1516	1598	883	1772	1188	1941	839	1377	470	1433		1567	2485
205	1301	2065	1850	1557	2376	2609	2068	2375	1476	2622	1750	1272	959	1831	2566	931	998	1936	2139	2156	972	554	2872	1212	3464	1101	1498	1306	2285	906	1411	925	998	1084	982	1289	1612	1646	875	1716	1172	2080	696	906	550	1471		1501	2287
206	1263	2048	2208	1551	2396	2594	2028	2335	1674	2467	1513	1475	918	1657	2435	992	1042	1890	1880	2079	890	601	2871	1413	3292	992	1420	1404	2360	1153	1362	843	1037	1227	856	1245	1657	1629	976	1729	1315	1960	883	1304	387	1570		1457	2343
207	1206	2174	2029	1539	2233	2497	2198	2274	1425	2571	1718	1104	1112	1729	2377	768	1274	1739	2156	2067	951	653	2710	1396	3153	1008	1436	1319	2285	1004	1288	998	1070	1180	930	1098	1572	1623	1011	1716	978	1746	887	1401	448	1443		1539	2471
208	1369	1941	2019	1394	2330	2583	1608	2098	1699	2545	1757	1259	1137	1516	2370	840	1148	1653	1982	2064	910	591	2701	1245	3179	1122	1201	1331	2030	1096	1188	774	877	1032	923	938	1493	1623	917	1664	1257	1991	896	963	413	1317		1618	2320
209	1216	1735	1827	1585	2484	2511	1746	2604	1479	2573	1578	1416	1073	1752	2215	887	1028	1802	1884	2177	730	659	2618	1227	3209	1046	1283	1432	2023	1065	1264	638	1099	1090	830	1229	1437	1548	871	1583	1158	1989	767	874	284	1406		1479	2515
210	1275	1980	1922	1535	2143	2385	1686	2001	1503	2548	1756	1180	1147	1470	2127	870	954	1697	1927	2090	837	733	2587	1302	3088	1249	1266	1359	1845	1020	1260	867	1369	994	1022	1022	1455	1542	974	1790	963	1989	907	1262	431	1208		1248	2578
211	1381	2128	1907	1364	2166	2523	1852	2193	1596	2507	1670	1288	1138	1722	2031	669	1144	1856	2014	2137	792	604	2574	1241	2969	1320	1182	1434	1804	1031	1371	968	998	975	883	892	1421	1593	835	1740	1106	1723	939	1282	521	1209		1391	2192
212	1164	2098	1827	1384	2333	2339	1869	2152	1670	2646	1797	1131	1095	1566	2367	759	1141	1855	1671	2173	821	570	2512	1265	2985	1009	1234	1138	1884	1092	1047	1115	981	1075	970	1018	1385	1584	944	1736	1023	1685	782	1383	445	1403		1389	2186
213	1151	2014	1870	1539	2277	2466	1614	2104	1503	2499	1766	1423	969	1591	2309	962	1024	1689	1809	2094	824	652	2484	1065	3042	927	1236	1518	2117	1060	965	1019	899	949	977	1084	1581	1664	916	1608	991	1674	742	849	490	1173		1627	2199
214	1307	2145	1696	1497	2122	2507	1749	2219	1525	2773	1633	1229	964	1820	2275	926	1059	1754	1675	2095	866	673	2241	1213	3252	1063	1292	1426	1689	1056	1257	908	1488	1176	961	931	1539	1613	957	1712	1040	1560	751	825	513	1394		1461	2405
215	1181	1954	1724	1619	2329	2120	1646	1983	1662	2294	1589	1156	950	1617	2250	798	1084	1819	1840	2095	850	639	2145	1367	2954	1087	1298	1351	1849	1002	1129	844	893	1050	1015	996	1539	1638	837	1677	1032	1332	792	1181	398	1392		1241	2317
216	1156	1959	1764	1685	2115	2473	1791	2209	1484	2444	1598	1322	942	1715	2024	964	1012	1881	1653	1959	919	555	2237	1291	3450	973	1269	1244	1702	1274	1257	1097	1177	1064	775	1073	1515	1411	910	1693	1319	1512	903	912	436	1345		1411	2226
217	1172	1127	1537	1349	2199	2470	1096	2100	1492	2576	1442	1282	888	1404	2370	702	968	1823	1685	1847	797	549	2152	1162	3132	1125	1292	1376	2292	1218	972	768	1282	1080	996	1012	1460	1619	900	1441	1045	1298	857	1126	421	1326		1194	2097
218	1254	2065	1658	1581	2006	2297	1514	2007	1429	2185	1400	1032	1071	1463	2467	727	1038	1887	1596	2050	850	553	2092	1196	3006	1074	1377	1301	1710	1215	988	775	1189	1167	1117	1076	1422	1617	904	1379	963	1468	742	1143	407	1127		1371	2197
219	1257	2123	1510	1630	1925	2295	1165	2284	1329	2410	1436	1240	1067	1514	2323	842	1110	1900	1712	1912	762	614	2191	1267	3202	1109	1234	1494	1873	1178	1092	773	1006	1114	1047	987	1306	1505	826	1461	968	1435	952	815	272	1270		1305	1903
220	1011	1963	1643	1633	1897	2377	1719	2251	1185	2499	1487	1113	866	1455	1778	800	1198	1744	1557	1867	770	557	2220	1096	3113	978	1326	1378	1693	1083	1076	940	1002	995	964	1025	1446	1444	903	1529	1206	1437	604	507	426	1300		1350	1982
221	1081	1881	1495	1586	2136	2129	1334	1857	1260	2194	1226	1057	996	1601	2120	837	991	1598	1518	1806	659	509	2012	1209	2914	1045	1426	1147	1795	1246	1110	763	881	944	874	939	1266	1548	856	1502	1038	1332	715	1091	361	1137		1250	2014
222	1140	1884	1586	1456	1834	2097	1685	1740	1043	2386	1299	1232	1093	1679	2102	762	1008	1719	1237	1695	796	567	2034	1232	2871	993	1096	1044	1773	1008	854	855	968	971	841	913	1422	1317	1021	1392	981	1176	910	1173	234	1198		1187	1946
223	1189	929	1470	1458	2012	2291	1819	1783	1182	2108	1550	1210	840	1719	2046	825	1137	1593	1632	1749	851	510	1945	1164	2847	1076	1402	1243	1747	824	781	910	837	1029	931	1061	1549	1662	790	1383	941	1244	795	658	376	1182		1233	2149
224	1155	2346	1365	1502	1957	2258	1964	1788	1290	2360	1457	1275	1083	1505	2158	796	1014	1712	1401	1639	689	504	1914	1245	2897	1062	1167	1061	1846	1140	811	841	1238	944	800	1115	1380	1595	849	1369	822	1180	824	983	408	1184		1337	2132
225	1069	2234	1515	1552	1938	2221	2133	1669	1330	2296	1278	1031	963	1495	1957	807	1035	1895	1534	1742	693	402	1869	1099	2934	900	1337	1145	1706	1071	923	783	1332	924	999	959	1557	1416	907	1506	1028	1333	711	701	283	1176		1262	2085
226	1093	2679	1337	1346	1753	2287	66	1644	1344	2118	1247	689	845	1596	2112	736	1087	1685	1527	1452	667	576	1774	1129	3208	959	1106	1092	1604	952	838	893	874	1223	951	919	1377	1797	896	1435	764	1183	975	843	337	1206		1339	1929
227	1138	2620	1465	1391	1685	2166	279	1676	1261	2171	1120	1193	933	1533	2128	856	1051	1857	1552	1365	728	534	1775	1085	3118	1000	1149	1034	1652	865	853	842	1336	1020	830	1001	1458	1645	990	1328	1002	1189	687	710	399	1204		1017	2017
228	1061	2730	1297	1443	1996	2144	306	1631	1320	2168	1168	1093	1004	1374	2230	707	1159	1712	1380	1512	677	660	1749	1198	3218	1050	1051	1091	1695	895	758	661	1427	963	948	1055	1402	1439	932	1340	879	1063	663	952	365	1069		1207	1969
229	1300	2150	1209	1442	1941	2079	1093	1421	1383	2049	1325	986	901	1376	2106	724	1173	1783	1544	1571	589	385	1865	1360	3165	1107	1149	1131	1425	1225	755	744	1022	1087	825	971	1374	1494	826	1332	981	1098	939	696	360	1103		1200	2019
230	1079	2700	1327	1458	1850	1958	914	1449	1409	2273	1153	1070	961	1263	2140	795	1171	1526	1391	1462	726	442	1582	1231	3273	984	1089	948	1341	985	759	864	1225	1076	889	1007	1457	1639	886	1382	952	1069	592	1005	384	1150		1031	1905
231	1244	2598	1240	1445	1764	2120	944	1328	1078	2161	1130	859	848	1371	1708	763	1016	1671	1400	1355	781	505	1638	1074	3368	907	1207	965	1518	941	922	752	1215	982	787	1038	1486	1457	932	1328	888	1084	729	619	373	1237		1270	1797
232	1050	2287	1396	1575	1678	1688	950	1419	1078	2319	1022	1257	1059	1487	1849	845	1051	1745	1327	1509	752	527	1626	1167	3352	1044	1148	1097	1445	1044	892	682	1373	930	830	943	1241	1300	1012	1222	1096	933	699	663	356	1169		1139	1841
233	1097	2647	1238	1570	1777	1769	900	1479	1059	2007	1158	1029	982	1392	2001	801	1183	1457	1413	1420	650	440	1589	1179	3257	1183	1103	1421	1403	903	861	853	822	938	917	966	1554	1404	847	1286	887	1073	703	804	287	1205		1074	1828
234	1246	2357	1279	1491	1700	1704	905	1441	1237	2051	1272	897	1012	1370	1828	844	861	1746	1317	1447	721	476	1480	1130	3441	826	1051	1008	1758	1111	848	990	960	1044	795	1012	1429	1277	820	1348	935	989	763	782	372	1119		1246	1756
235	1191	2234	1295	1486	1552	1715	979	1450	1088	2156	1027	853	1027	1384	1985	770	1220	1720	1326	1302	761	495	1428	1176	3455	1033	1074	1024	1739	1063	889	953	1136	997	881	992	1401	1485	856	1060	929	1075	894	874	416	1093		1107	1665
236	1333	2729	1195	1523	1811	1549	928	1334	1078	1960	1331	936	1103	1387	1933	939	966	1590	1165	1462	745	414	1484	1121	3135	970	1254	1320	1843	1199	938	702	963	931	960	807	1455	1442	896	1265	830	862	830	661	358	1106		1027	1800
237	1342	2782	1160	1488	1662	1621	843	1294	1116	2044	1302	939	970	1436	2082	849	1025	1522	1103	1208	798	524	1480	1091	3538	989	1161	1121	1632	1010	747	819	1104	1114	826	818	1310	1383	879	1164	1006	883	719	613	325	1142		1052	1823
238	1140	2418	1219	1603	1597	1608	1031	1190	1091	2182	879	1067	1060	1228	1750	916	1088	1605	1137	1332	609	506	1420	1214	3383	998	1401	1096	1719	973	766	629	1082	1178	1018	1035	1455	1389	952	1393	1034	892	866	613	349	1023		1244	1530
239	1042	2696	1265	1492	1664	1597	934	1266	1189	1963	892	1081	997	1366	1766	782	956	1646	1238	1351	535	335	1440	1281	3447	903	1192	1189	2026	1096	615	742	1161	1058	964	1059	1287	1324	853	1067	781	942	772	581	370	1186		1163	1570
240	1096	2714	1181	1513	1521	1763	793	1110	955	1919	1051	1019	987	1431	1951	719	978	1643	1213	1285	527	400	1345	1101	3213	1066	1031	1279	1749	1136	595	758	1409	1132	965	955	1279	1552	874	1115	1023	722	658	577	449	1111		1138	1796
241	1048	2995	1006	1620	1593	1856	742	1161	1206	2144	1134	1161	881	1363	1859	702	1075	1620	1077	1328	472	458	1335	1012	3461	1047	1222	1342	1821	1054	679	966	1617	1200	956	870	1396	1538	846	1219	1136	852	824	685	348	1006		1239	1732
242	1271	2368	1133	1329	1408	1910	875	1053	1071	2103	1146	944	1005	1344	1733	703	1071	1603	1161	1298	598	421	1380	1260	3173	867	1201	1265	1596	943	723	814	1119	1052	845	1129	1162	1423	893	1147	1200	912	651	452	319	1160		1334	1638
243	1111	2177	1174	1355	1327	1741	937	1099	1116	2089	1152	1060	1046	1422	1969	681	994	1612	1288	1259	659	428	1310	1102	3439	1100	1267	1323	1685	924	550	956	2606	880	859	1114	1698	1236	884	1152	1193	850	848	566	252	1197		1223	1690
244	1236	2742	1113	1513	1319	1707	975	1271	1178	1980	962	1085	863	1471	1996	822	1080	1513	1114	1323	630	468	1303	1206	3450	1103	1145	1273	1746	1113	911	791	2563	1046	1162	1110	1333	1282	990	1215	992	733	846	544	237	1016		1025	1677
245	1044	3038	1136	1578	1322	1665	745	1117	1025	2148	1244	1203	1064	1439	1799	785	1016	1487	1167	1548	684	503	1436	1158	3253	1125	1188	1274	1755	1130	573	697	2459	1081	942	986	1436	1433	855	1221	934	810	710	642	291	1135		1095	1582
246	1164	2884	1089	1373	1238	1711	839	1021	1039	2186	1156	1046	936	1328	1950	620	1023	1502	1195	1672	635	381	1208	1229	3365	1119	1199	1303	1757	1035	545	833	1781	1132	907	934	1353	1433	835	1171	1000	868	793	394	287	1229		1142	1562
247	1175	2436	1221	1569	1270	1787	808	745	1008	1930	1017	1086	1019	1386	2191	760	1109	1425	944	1761	604	438	1339	1109	3289	1081	1131	1294	1784	1115	713	996	1354	1059	960	874	1404	1391	760	1094	935	697	894	521	378	1217		978	1678
248	1213	2891	1248	1393	1264	1484	712	975	1088	1897	1041	895	1070	1341	1858	761	1120	1481	928	2111	670	437	1340	1161	3244	1043	1117	1548	1569	1053	627	628	772	957	870	1004	1545	1400	871	1215	867	716	944	491	358	1037		1067	1673
249	1192	2581	1041	1529	1131	1647	804	1091	1158	1834	1053	923	896	1310	1930	664	1073	1358	1024	2018	812	527	1405	1144	3111	988	1276	1332	1522	885	583	865	904	1123	964	954	1589	1524	850	1016	830	638	729	680	309	1103		1083	1543
250	1264	3178	1077	1408	1423	1653	784	1017	1127	1829	900	901	1031	1648	2119	886	1062	1500	960	1869	690	339	1189	1268	3121	989	1205	1298	1692	1114	714	826	1214	1096	942	1076	1377	1562	918	1058	880	596	691	516	232	1231		1098	1546
251	1341	2697	959	1553	1472	1609	670	1060	1222	1738	778	853	1027	1651	1682	691	1164	1405	898	2042	656	369	1334	1205	3189	1162	1094	1430	1546	866	829	868	1065	1068	876	978	1610	1435	729	1169	833	643	698	589	284	1057		1167	1569
252	1274	3262	1206	1446	1232	1445	670	1099	1015	1827	1205	899	868	1802	1556	676	1036	1477	965	2198	619	396	1256	1125	3038	1097	1163	1565	1518	897	551	716	805	928	915	1004	1423	1368	933	1100	750	772	810	629	319	1108		1130	1533
253	1156	2715	1027	1603	1204	1531	840	1080	1169	1982	934	911	1072	1343	1675	757	1018	1464	924	2090	540	381	1134	1195	3268	1004	1153	1313	1634	990	771	927	1495	1108	925	1050	1564	1498	871	1192	807	833	739	563	347	1124		1069	1527
254	1082	2975	1081	1425	1568	1539	744	1043	1228	2083	933	906	999	1506	1917	836	1009	1432	1024	2515	731	398	1258	1206	2902	1019	1056	1357	1606	1077	603	953	1425	1056	952	822	1211	1448	863	1020	930	854	747	535	257	1047		1207	1295
255	1195	3125	1200	1545	1412	1729	553	955	978	1899	1123	840	1087	1456	2003	729	1011	1451	779	2216	636	393	1352	1166	2843	1212	1149	1139	1551	1078	607	796	1226	1020	854	930	1410	1708	899	1103	875	709	651	580	295	907		1183	1674
256	1168	3128	991	1491	1467	1670	494	906	1255	1901	1021	1005	900	1356	2090	744	1114	1448	915	1991	682	415	1243	1127	3017	906	1205	1231	1391	1146	634	830	1120	1019	890	1061	1497	1482	937	1046	883	762	723	753	303	1163		1133	1428
257	1254	3045	1014	1500	1349	1371	588	966	1273	1814	1212	1057	989	1466	1986	679	910	1410	1007	2256	632	402	1188	1239	2978	981	1317	1676	1299	1080	584	739	902	896	771	933	1357	1520	1011	1092	1113	827	763	541	320	1218		1079	1577
258	1244	3202	1228	1594	1392	1878	502	1047	1105	1878	938	1001	983	1342	2173	868	1095	1448	859	2292	709	345	1223	1142	3064	981	960	1111	1538	1111	561	888	1009	1027	845	912	1425	1417	987	1071	936	665	795	595	269	1029		1084	1551
259	1193	3044	954	1475	1385	1689	305	1036	1190	1775	915	1008	877	1278	2031	789	1030	1299	790	1847	529	335	1242	1281	3169	1001	970	1126	1434	1253	591	883	1191	1101	936	973	1434	1562	1041	1097	908	629	779	557	282	1052		1029	1598
260	1219	2978	1033	1640	1442	1392	525	904	903	1784	1000	758	873	1316	2119	906	1132	1419	896	1795	536	255	1237	1175	2877	904	1163	1263	1500	951	510	798	900	1009	742	1014	1348	1435	881	1090	666	547	767	530	295	1027		1033	1466
261	1033	3116	960	1540	1528	1399	564	965	1223	1759	821	1010	927	1460	2094	818	1065	1367	817	1855	586	371	1230	1123	3039	910	1058	1138	1308	985	507	738	1280	1065	988	1006	1322	1494	954	1140	922	767	852	718	209	1020		1072	1486
262	1080	3101	992	1625	1457	1618	570	1023	1131	1839	1156	1055	950	1367	2004	723	1081	1398	816	1714	635	368	1212	1374	2890	1084	1303	1225	1434	986	453	901	948	861	1103	848	1334	1475	907	978	954	727	774	575	320	1002		1177	1584
263	1135	2928	1205	1641	1567	1779	159	992	1151	2011	1148	857	1023	1424	2113	804	1131	1173	779	2018	696	385	1234	1253	3123	1081	1149	1029	1502	920	479	759	1735	975	1035	826	1363	1521	830	1135	908	612	906	532	223	1099		1046	1425
264	962	2944	1158	1384	1289	1600	173	877	1167	1998	980	917	1148	1422	1961	754	1117	1387	670	1861	626	290	1183	1168	3042	1039	1143	1060	1624	986	555	935	1241	998	969	1081	1355	1615	787	1113	937	552	762	682	188	1011		1151	1437
265	1107	2951	910	1634	1337	1487	239	951	1055	2124	1161	745	844	1354	2106	722	929	1280	817	1474	769	228	1241	1125	3181	1012	1166	1099	1721	1138	508	803	2027	863	910	1001	1423	1648	906	1008	924	732	739	697	203	1089		1196	1553
266	1142	3120	934	1404	1165	1427	300	909	1293	2196	968	1015	935	1522	1693	859	1002	1321	876	1676	560	201	1229	1261	3008	1181	1109	1219	1672	1009	712	836	1219	1052	910	988	1591	1441	906	969	949	752	632	470	251	974		1216	1643
267	928	2969	976	1489	1499	1384	330	1006	1188	2051	937	873	945	1545	1960	843	1103	1297	849	1558	518	523	1092	1223	3021	1035	1152	1228	1449	1016	565	818	918	1045	1024	878	1342	1478	672	1100	961	644	809	433	324	1028		1180	1631
268	1234	2945	1073	1443	1255	1581	286	1013	1186	2275	990	823	851	1314	1835	672	1134	1489	772	1619	665	330	1090	1098	2701	1063	886	1171	1517	1014	509	1016	933	1039	896	850	1510	1355	917	1088	822	642	825	524	302	1050		1042	1620
269	1188	2977	790	1404	1276	1431	444	762	1236	2317	895	1017	1036	1304	1930	866	952	1333	771	1534	608	333	1181	1182	3146	1181	1099	1265	1521	1056	475	977	1418	1020	869	977	1434	1467	1001	1252	961	831	865	552	254	1292		990	1464
270	1274	2867	1079	1541	1321	1663	258	723	1177	2629	914	897	865	1433	2090	817	957	1377	696	1501	741	436	1225	1058	2939	1096	930	1162	1719	1088	440	981	1254	880	989	958	1462	1603	881	977	1153	709	739	689	238	1236		1136	1501
271	1157	2814	978	1314	1218	1656	330	798	1278	2799	912	906	1017	1443	1973	635	1076	1322	709	1473	621	315	1126	1164	3154	1023	1207	1305	1540	893	569	990	836	1046	857	823	1359	1452	865	1061	836	715	783	649	311	1131		1202	1771
272	1109	3088	967	1442	1288	1630	211	779	1131	3083	959	969	942	1482	1977	823	1186	1492	769	1350	614	360	1219	1142	2898	1084	1145	1454	1375	930	683	967	976	1220	941	1015	1486	1560	976	931	950	804	919	621	242	1134		1021	1454
273	1044	2882	952	1380	1462	1734	182	991	1274	3155	1045	983	989	1655	2138	833	1044	1244	722	1272	582	389	1131	1137	2823	908	1160	1433	1540	953	738	927	1796	979	837	993	1426	1479	870	845	1032	751	779	579	303	1102		1205	1524
274	1087	2804	912	1275	1294	1440	230	937	1137	3661	1100	863	892	1414	1746	781	1030	1393	771	1451	637	387	1138	1226	2908	967	933	1513	1483	1013	517	1010	1451	971	926	989	1557	1508	927	1081	947	623	676	496	259	1133		989	1338
275	1063	2790	1024	1509	1284	1332	210	927	1082	3378	868	945	890	1462	1998	786	998	1349	836	1340	631	328	1236	1277	2859	1138	1162	1411	1328	873	533	937	1855	1062	938	982	1571	1581	857	939	812	725	777	504	222	1007		1128	1309
276	1093	2888	1089	1686	1039	1485	388	833	1078	3596	1047	1121	886	1828	2123	742	1153	1170	770	1355	679	429	844	1088	3056	922	1058	1469	1462	1133	677	903	1833	1079	764	1049	1590	1578	955	1077	934	681	700	738	407	1001		1207	1650
277	1024	2822	920	1592	1150	1414	335	881	1140	3538	859	969	933	1312	1967	878	1091	1372	723	1433	747	359	872	1240	2930	1091	1098	1276	1323	1151	610	946	1786	1023	966	970	1740	1526	867	1040	896	656	838	526	328	1144		1139	1617
278	1255	2706	1042	1576	1110	1315	282	802	1260	3651	935	839	945	1794	1637	694	1110	1549	786	1137	838	334	959	1141	3030	969	1059	1454	1219	1044	714	928	1822	914	839	931	1328	1425	912	1025	865	599	654	685	310	1114		974	1419
279	1205	2999	1001	1536	1045	1410	394	877	1274	3599	1033	958	1019	1634	2022	703	1134	1372	924	1232	566	373	957	1252	3164	946	1057	1337	1600	941	687	873	2102	986	891	1068	1397	1662	797	1075	778	581	793	512	371	1129		988	1435
280	1049	2821	850	1560	1128	1439	404	880	1095	3559	941	926	897	1461	1970	758	1084	1413	878	1430	600	347	973	1158	3045	905	1077	1347	1290	1069	574	787	1913	1142	1000	1235	1348	1439	863	964	987	663	767	471	315	954		1103	1383
281	1100	2972	1002	1662	1186	1294	355	754	1073	3883	958	1024	962	1543	2126	770	990	1376	794	1216	698	361	991	1169	2735	1037	1090	1366	1397	853	332	826	1304	892	926	941	1248	1523	940	1032	784	716	751	518	325	1176		1113	1444
282	1056	2986	977	1534	1166	1295	770	767	1054	3654	884	996	867	1373	1897	814	1040	1300	681	1284	616	286	1039	1080	2979	986	918	1036	1411	906	627	1021	1785	991	716	1016	1215	1582	999	1028	1053	625	782	495	240	1261		1058	1359
283	1309	2015	1110	1522	1011	1379	1095	795	1264	3617	1186	982	964	1566	1937	836	1035	1193	818	1328	517	304	768	1232	2863	948	1129	1245	1494	1085	529	884	1391	929	936	1065	1397	1606	779	904	932	744	718	526	227	1126		1015	1539
284	1129	2107	969	1558	1167	1255	1053	827	1176	3580	1183	790	893	1357	1848	793	1121	1244	709	1196	604	286	954	1184	3036	1071	1250	1350	1440	1021	542	929	1583	863	813	969	1390	1592	1016	1024	840	661	746	426	258	1188		1137	1405
285	1108	2413	980	1380	1202	1428	1051	1126	944	3596	989	892	988	1095	1875	660	1073	1440	729	1373	542	368	863	1144	2990	905	1242	1251	1134	894	707	1016	2044	1002	966	754	1307	1428	874	1022	992	620	759	569	203	1061		1029	1576
286	1039	2399	962	1610	1172	1294	968	921	1285	3512	1039	870	916	1566	2154	655	1117	1293	804	1102	678	519	839	1106	3012	1210	1434	1315	1207	838	667	1238	2401	1005	947	1061	1485	1623	828	945	1011	548	768	545	293	1029		1289	1353
287	1122	2434	885	1522	1244	1199	913	891	1326	3456	945	968	971	1493	1935	763	1116	1337	800	1196	566	230	1027	1261	2736	1041	1180	1314	1339	1477	729	1190	2428	1092	896	860	1379	1586	819	1012	932	567	647	606	256	1029		991	1624
288	1149	2422	963	1411	1353	1452	846	931	1313	3408	845	870	942	1346	1961	777	1068	1465	749	878	544	319	1028	862	2828	887	1122	1731	1240	1463	707	1317	2185	944	1017	977	1593	1491	1103	1062	753	576	877	494	281	955		1181	1611
289	1292	2609	909	1393	1385	1289	1028	855	1160	3622	1080	913	1014	1353	2115	666	1159	1337	660	1304	648	422	885	1204	2942	897	1180	1778	1330	1364	808	1154	2237	1124	815	830	1455	1574	794	886	893	633	807	480	246	1007		1087	1464
290	1353	2346	887	1539	1384	1226	700	882	1288	3546	920	835	957	1589	1851	617	1159	1308	962	1098	651	347	856	1032	2898	1051	1185	1745	1295	1301	595	1133	2875	989	1049	925	1612	1405	763	1016	905	521	796	569	325	1143		1124	1538
291	1128	2468	998	1615	1266	1240	864	747	1200	3392	911	968	1064	1391	2123	744	1003	1386	782	1150	611	333	969	1069	2948	999	1112	1630	1292	1228	905	1223	2158	1101	959	1020	1570	1578	945	925	906	710	734	557	317	1028		1017	1467
292	1306	2488	963	1476	1252	1289	868	904	1053	3397	951	773	811	1430	1952	699	966	1294	689	1062	605	311	974	980	3110	996	1428	1645	1424	1305	726	1212	3160	1077	944	968	1360	1545	832	1114	824	781	802	510	341	1126		1154	1532
293	1031	2356	886	1345	1287	1249	1037	792	1136	3396	1026	746	1000	1385	1952	759	1241	1307	888	948	555	333	810	1079	2708	1033	1195	1598	1257	1413	979	1162	2871	1107	747	1028	1270	1625	840	1000	1035	705	704	541	232	1177		1256	1588
294	1037	2378	997	1535	1204	1060	1147	880	1354	3354	984	769	1060	1396	2033	735	1161	1315	917	1042	594	389	1000	1235	3003	1163	1243	1744	1323	1271	772	1267	2304	1052	949	1026	1455	1559	934	1033	822	552	709	558	233	970		1139	1481
295	1099	2249	836	1434	1209	1285	750	1017	1223	3399	888	937	956	1452	2059	821	1049	1538	909	1141	785	254	868	1279	2934	862	1318	1428	1246	1408	890	1307	3074	882	1094	952	1455	1525	912	892	798	665	807	464	355	1117		1146	1601
296	1154	1509	956	1506	1297	1260	918	764	1143	3153	1041	823	922	1397	1823	700	1049	1377	878	1146	644	251	980	1234	2797	939	1264	1758	1142	1487	833	1734	3007	1078	968	1097	1146	1466	727	1021	719	737	944	330	227	1234		1292	1567
297	1093	2295	924	1538	1357	1329	746	787	1030	3217	837	1005	1127	1302	1773	687	1055	1303	664	1023	424	253	973	1048	3046	1026	1273	1544	1136	1131	668	1840	2344	994	916	1169	1487	1598	815	1021	905	820	853	473	241	1076		1063	1369
298	1155	2212	990	1556	1303	1311	831	944	981	3176	1118	879	919	1499	2026	812	1098	1320	648	1015	618	387	897	1088	3049	926	1311	1649	1312	1074	738	1937	3091	953	974	764	1638	1490	971	1182	776	764	880	473	333	1086		1040	1277
299	1141	2315	986	1586	1281	1173	924	950	1207	3349	933	1071	959	1578	2140	755	956	1234	557	864	633	331	1058	1252	2709	937	1150	1609	1409	864	822	1750	2333	1090	935	927	1483	1703	1018	922	842	639	768	497	257	1016		1079	1588
300	1195	2330	905	1381	1421	1296	699	882	1142	3219	961	958	848	1713	1941	739	1047	1136	811	1079	714	340	970	1038	3002	1072	1412	1654	1391	1067	866	2009	3196	923	753	953	1376	1580	924	890	793	629	789	396	226	1088		1115	1419
301	1286	1475	816	1453	1397	1236	773	685	996	3070	987	788	915	1257	2023	788	1012	1439	657	967	654	333	853	1064	3190	996	1394	1707	1474	871	797	1835	2321	986	1107	930	1466	1609	888	973	1042	675	770	462	401	1048		1049	1402
[truncated: 106 more columns]

## Sheet: AIAChr,AIAGC WT,UNC7UNC9,UNC18
Figure 2G, 2H, 2S-1F, 2A-1G
AIA::GCaMP5A F(A.U.)
Stimulus:	AIA::Chrimson
Genotype:	WT
N:	1	2	3	4	5	6	7	8	9	10	11	12	13	14	15	16	17	18	19	20	21	22	23	24	25	26	27	28	29	30	31	32	33	34	35	36	37	38	39	40	41	42	43	44	45	46	47	48	49
Frame (Pulse at 100)
1	436	445	498	401	249	532	635	469	543	473	296	570	547	406	389	813	446	307	327	254	448	314	362	442	389	476	342	451	420	519	508	472	581	570	543	330	325	396	504	471	374	453	405	384	502	419	285	362	471
2	422	419	461	371	273	456	558	543	500	380	234	491	524	419	377	776	595	357	324	284	438	356	367	446	399	368	402	551	340	422	557	434	550	650	669	316	476	306	527	403	365	525	445	399	451	348	196	366	462
3	433	486	381	432	390	450	519	455	476	394	264	487	482	401	341	813	535	325	382	243	519	239	392	444	368	343	400	414	362	361	636	635	486	520	486	264	452	411	547	453	522	556	376	384	505	408	248	250	501
4	433	552	397	248	358	498	580	439	603	379	387	397	618	463	369	756	412	284	263	276	472	420	271	462	406	338	426	573	313	406	522	608	508	581	480	307	431	311	478	473	422	556	446	304	455	343	308	317	494
5	365	471	463	317	394	470	705	534	541	465	390	540	581	453	416	659	515	337	366	288	476	256	379	478	495	454	377	381	328	488	539	510	541	697	441	350	479	390	560	432	298	578	414	371	382	504	195	255	431
6	361	423	487	315	365	514	626	565	586	454	364	536	508	504	414	679	494	381	362	343	469	292	445	513	442	407	360	520	292	483	478	558	540	450	584	273	454	434	546	448	447	455	457	215	438	412	247	185	536
7	410	466	400	374	387	526	466	553	495	314	361	540	418	361	437	644	448	323	396	234	608	209	448	403	385	299	432	426	376	490	650	492	512	624	519	337	460	298	457	442	529	431	357	301	417	465	232	246	416
8	299	430	456	336	322	551	619	522	557	429	170	695	534	467	447	663	490	314	315	347	581	326	323	451	413	323	343	477	307	478	537	497	592	531	405	373	510	380	585	296	468	539	471	288	477	476	378	289	496
9	360	501	453	327	430	519	592	570	464	348	287	544	515	580	500	814	513	296	344	249	391	251	331	496	513	362	367	522	339	501	412	516	459	553	488	335	462	338	519	335	470	551	466	429	405	381	294	233	448
10	363	438	451	274	402	458	662	511	514	564	264	551	462	567	520	696	489	317	441	300	459	364	356	448	488	412	424	450	286	488	469	507	617	586	569	310	461	355	584	534	388	448	442	352	518	416	225	262	422
11	402	413	441	382	396	418	533	505	497	475	234	476	590	478	516	743	450	393	349	235	471	367	412	436	458	344	494	482	420	369	551	554	556	569	495	267	462	295	521	386	424	455	306	277	480	550	343	329	566
12	396	398	547	390	469	484	603	512	551	346	285	502	588	480	399	728	482	392	297	270	488	295	390	367	567	395	344	363	311	501	433	553	564	534	458	241	484	420	596	464	503	410	520	303	428	425	230	225	379
13	305	439	471	390	403	478	582	428	522	473	346	597	537	469	470	696	461	378	308	297	451	409	291	549	362	388	463	528	319	430	587	505	538	454	423	302	543	350	613	398	447	505	429	350	546	348	273	318	379
14	390	502	451	339	369	556	614	562	453	407	280	560	512	564	456	643	456	326	335	220	521	386	393	452	447	358	415	458	295	314	550	556	577	615	565	267	481	484	576	346	464	461	455	310	455	454	230	310	453
15	442	465	414	302	279	444	593	540	552	445	230	594	456	522	502	556	537	327	320	408	517	398	373	446	410	323	378	568	316	490	362	595	496	603	459	357	461	357	482	375	403	460	433	334	447	349	335	207	493
16	440	481	474	279	521	507	513	401	529	401	351	541	552	546	508	681	418	374	298	348	405	392	479	399	508	296	359	496	385	391	550	627	546	624	542	321	465	449	558	452	534	427	466	480	492	458	317	277	500
17	392	490	437	275	418	364	513	616	586	340	291	565	555	495	581	587	416	408	303	276	481	206	385	430	449	355	419	430	250	471	435	540	645	530	604	277	486	383	552	521	501	422	422	419	505	419	194	304	563
18	469	436	484	323	255	431	516	448	460	387	226	632	548	486	552	741	544	423	415	384	477	319	249	435	294	326	313	450	371	461	352	588	519	619	457	294	408	462	489	444	487	559	373	401	387	461	324	235	522
19	547	428	455	306	376	408	678	463	576	304	314	520	535	514	474	660	519	346	206	312	531	260	286	462	312	464	384	524	354	484	461	453	504	557	523	329	505	476	509	387	404	547	480	454	384	456	234	280	530
20	454	394	498	395	310	466	574	439	454	333	363	656	600	508	646	651	598	346	227	360	491	292	330	365	468	311	331	466	375	510	404	614	485	562	634	341	471	370	661	405	365	533	449	335	442	483	364	214	566
21	438	504	443	344	392	636	518	525	508	441	373	558	540	559	576	582	486	370	244	277	418	446	295	524	400	304	337	550	317	518	604	545	547	529	479	377	544	453	542	473	318	433	416	356	480	531	226	360	426
22	393	396	520	425	339	507	650	552	422	436	217	621	501	472	600	625	448	271	229	337	466	422	365	531	445	408	319	446	370	416	407	409	615	570	519	193	550	391	521	532	477	583	475	333	481	419	287	315	573
23	483	386	609	409	335	550	559	545	574	372	269	566	529	420	481	556	395	404	321	282	506	296	254	475	423	398	445	451	377	404	450	515	516	560	512	286	361	409	630	536	386	437	420	419	478	309	234	378	492
24	489	423	536	392	346	519	546	469	514	421	275	511	668	596	543	565	478	420	400	317	410	347	399	340	409	314	386	431	316	496	499	521	492	572	668	288	374	358	584	428	388	489	376	421	382	518	279	249	491
25	460	419	379	313	440	423	544	509	515	449	294	552	570	429	506	580	499	407	244	262	494	298	336	461	259	401	400	325	248	440	399	531	529	484	511	253	436	522	564	523	470	407	538	334	445	451	232	288	515
26	441	457	559	321	332	489	599	532	579	349	348	745	650	464	523	581	482	347	378	307	527	384	306	364	523	313	370	429	304	376	503	536	545	611	599	299	499	356	368	407	361	523	470	308	350	372	309	313	570
27	381	468	499	365	203	468	447	517	517	411	323	586	551	534	624	669	530	430	222	192	500	383	389	500	531	317	396	446	366	478	455	495	540	590	502	254	385	411	650	523	358	466	458	300	296	446	369	284	627
28	428	491	447	322	336	559	705	579	459	384	377	493	604	495	531	551	508	415	241	462	459	275	343	441	470	341	466	404	325	543	358	611	542	639	593	287	415	354	489	534	353	568	419	406	431	492	279	230	521
29	456	430	574	293	365	454	605	474	620	453	243	588	562	513	530	637	469	393	319	258	438	306	322	437	454	336	385	444	300	438	473	525	504	582	561	258	330	419	532	448	340	509	532	340	418	406	250	194	532
30	488	490	374	360	309	483	576	559	505	429	261	591	602	581	599	580	482	432	280	252	390	295	311	512	440	290	394	362	328	443	430	578	506	534	380	329	439	368	433	351	308	502	337	418	370	435	305	339	543
31	384	407	411	385	564	434	668	482	617	479	243	575	473	560	517	560	603	431	343	294	501	347	245	434	432	322	395	519	383	458	423	560	459	590	369	345	432	359	584	399	424	485	500	267	494	425	231	294	443
32	392	527	390	347	251	538	664	544	530	364	319	568	634	455	420	557	487	392	305	206	525	276	208	493	444	354	358	459	303	362	358	530	608	574	465	353	326	374	618	476	450	469	406	383	518	477	349	386	416
33	484	398	524	375	418	663	547	516	467	564	308	660	528	433	483	411	524	296	243	265	460	406	281	392	531	425	450	521	234	525	417	501	573	538	556	182	429	358	557	510	350	494	442	439	297	441	263	450	539
34	425	414	494	408	389	488	555	603	423	484	362	680	622	544	453	491	520	451	373	227	464	292	299	479	515	267	335	589	340	468	459	452	542	581	523	362	443	433	577	496	418	413	493	304	445	536	246	332	477
35	470	386	417	346	386	356	541	469	583	438	245	548	535	391	517	441	377	331	306	292	433	359	364	423	432	233	432	540	294	417	401	578	559	617	527	278	546	451	525	417	484	445	488	296	415	461	167	456	496
36	485	472	354	480	331	464	573	551	543	468	338	627	418	430	451	466	561	468	264	364	581	375	320	415	380	343	306	519	394	485	335	652	537	603	467	296	523	314	519	445	365	515	519	298	493	410	306	356	475
37	372	381	489	343	450	618	577	565	372	517	287	537	562	452	575	491	491	443	227	213	448	332	237	368	441	399	397	420	275	475	467	602	576	554	413	264	402	392	526	498	579	414	406	372	409	456	188	325	479
38	359	388	421	418	318	451	583	534	620	399	244	549	508	575	502	552	512	443	291	360	462	318	332	398	438	361	434	427	451	453	407	505	565	589	412	307	376	302	625	438	391	580	435	371	521	327	285	347	467
39	392	290	448	259	394	607	522	651	531	362	241	593	550	479	556	469	618	307	379	294	460	249	297	514	493	298	480	465	229	474	556	609	470	606	498	365	460	341	570	398	343	452	405	413	317	456	229	374	402
40	429	199	516	413	408	486	522	595	598	442	249	585	618	452	471	522	556	286	282	283	523	394	362	541	491	250	337	581	390	528	415	560	509	546	383	273	403	438	534	336	405	461	526	296	501	459	309	374	564
41	428	367	356	279	439	501	518	583	517	444	367	548	472	495	526	442	634	380	363	256	455	359	253	550	499	410	391	499	376	426	693	651	526	673	393	292	378	337	718	506	377	480	428	457	556	482	212	304	493
42	366	390	510	368	297	709	472	509	513	464	333	599	559	324	547	449	525	374	351	308	455	465	223	616	448	259	415	512	280	374	511	451	553	574	429	278	329	368	533	449	418	510	350	443	424	494	291	475	522
43	463	418	440	326	278	591	576	546	578	454	261	577	497	457	506	508	594	351	247	264	461	392	300	495	365	232	389	497	289	579	447	491	483	641	449	291	448	347	549	435	435	477	468	275	493	449	283	349	489
44	362	310	314	319	467	670	567	639	517	370	310	463	563	509	559	546	445	398	359	261	558	315	266	510	438	310	440	547	295	477	529	475	515	468	399	281	445	390	528	477	358	349	435	363	438	414	325	463	545
45	314	398	450	416	354	605	427	516	563	469	253	575	569	531	511	562	651	296	321	302	520	318	279	479	380	309	370	443	353	443	603	393	522	603	449	218	422	270	460	357	359	510	449	464	362	468	447	364	488
46	432	372	379	364	380	626	497	430	624	475	304	635	404	561	465	520	429	294	146	283	444	379	316	503	526	245	424	446	349	477	455	519	529	512	507	299	425	237	570	350	467	484	400	319	449	443	304	340	445
47	432	361	481	351	261	621	531	605	516	430	336	644	637	504	502	486	638	393	291	355	557	352	332	499	506	253	355	409	413	533	442	534	626	603	420	322	468	263	508	327	217	487	511	300	474	407	345	356	398
48	315	439	421	335	404	608	578	570	468	371	245	503	467	549	580	532	620	299	231	234	490	298	248	390	412	300	451	486	266	544	436	600	415	480	387	362	451	366	475	327	346	449	393	383	419	420	201	405	448
49	385	420	483	332	529	622	424	528	604	344	329	597	607	364	532	390	472	262	329	353	571	396	292	460	284	384	444	495	405	408	505	693	565	548	457	392	476	260	646	298	465	499	381	361	325	454	271	417	587
50	332	306	527	436	382	534	571	387	553	331	299	477	621	536	560	501	565	386	314	246	471	271	363	456	334	303	439	389	425	451	510	552	527	596	390	341	511	366	428	388	433	567	393	340	460	434	312	308	516
51	399	411	358	278	369	526	610	566	564	419	208	640	576	532	552	430	575	334	317	283	489	363	324	563	411	234	404	452	407	466	564	536	516	568	559	369	359	244	555	408	372	476	445	341	438	415	371	373	453
52	350	326	465	264	274	511	545	614	556	386	320	573	544	442	500	612	548	336	305	280	554	392	240	489	368	265	405	379	302	449	492	528	518	615	428	227	470	343	548	380	383	470	395	349	374	473	352	419	490
53	365	346	501	346	568	597	532	610	600	427	278	564	439	447	666	579	502	318	276	244	525	350	390	546	470	385	408	461	332	512	502	628	408	683	410	182	473	260	516	334	412	408	483	308	344	419	196	333	573
54	428	324	514	378	242	535	537	492	585	443	241	633	577	470	514	460	421	432	319	195	466	350	316	420	412	265	393	526	316	455	542	587	518	607	458	362	472	327	492	336	433	499	455	427	411	322	339	435	484
55	378	361	420	315	194	625	517	553	682	491	251	570	496	356	453	506	532	446	330	199	447	319	272	450	431	334	395	495	287	358	450	509	609	487	349	297	432	279	571	315	447	513	422	324	392	390	336	326	492
56	360	458	421	331	353	579	432	574	543	445	292	620	449	378	511	558	585	391	345	294	451	210	250	438	400	312	378	431	249	435	577	527	566	519	439	298	426	316	537	390	385	448	422	343	474	516	246	375	412
57	376	425	442	336	404	649	501	656	436	386	279	612	556	526	465	538	503	300	308	273	498	279	343	472	267	179	412	447	347	336	509	618	604	500	437	309	533	290	460	315	501	473	520	378	375	492	314	324	508
58	358	368	514	290	380	564	543	538	553	445	230	617	589	386	595	632	469	339	400	256	474	371	257	553	363	344	435	476	431	481	519	561	476	503	360	407	427	246	519	390	347	588	410	376	421	426	343	381	473
59	270	408	379	373	349	449	566	528	569	382	184	642	425	455	523	509	616	377	276	291	427	299	254	561	434	280	434	465	343	479	539	588	503	634	422	358	454	363	492	364	380	498	451	323	369	473	423	396	580
60	505	513	559	300	414	593	511	568	526	392	271	553	459	524	516	585	579	403	254	259	533	310	250	479	429	357	340	370	278	516	367	523	500	425	386	324	327	190	541	316	503	509	399	329	506	413	331	234	439
61	407	425	396	348	185	614	616	497	598	413	300	566	549	537	441	465	553	259	386	315	538	302	386	433	446	167	395	478	456	417	430	538	456	479	376	399	464	340	435	381	356	433	420	250	561	445	280	389	534
62	353	439	403	332	405	639	581	525	636	392	245	449	530	402	440	626	655	367	235	367	433	337	277	591	403	271	348	400	226	527	483	591	530	523	368	277	456	391	491	486	360	492	484	405	399	400	386	418	593
63	330	434	406	381	265	495	584	518	531	372	287	555	503	520	415	506	631	299	313	406	601	366	196	481	376	318	360	413	349	460	553	568	514	528	386	359	445	354	607	388	398	583	442	393	475	389	313	365	489
64	304	317	394	380	353	511	519	536	603	459	186	701	590	556	410	505	498	355	383	349	445	428	294	457	418	295	325	462	315	438	403	480	519	556	405	255	547	271	563	307	321	335	445	320	385	530	328	337	524
65	368	417	433	276	526	567	469	545	639	396	255	640	504	414	449	561	530	312	373	333	465	363	255	416	421	250	430	370	308	457	502	644	539	578	395	355	434	395	567	391	446	497	422	355	382	470	315	406	474
66	371	412	428	391	329	492	647	567	563	331	271	537	682	346	446	452	603	453	321	355	596	336	372	501	408	312	446	547	287	480	484	597	525	501	410	271	337	362	433	465	364	498	423	430	401	518	315	423	538
67	314	369	366	330	447	486	665	539	488	346	178	577	601	406	472	572	558	360	348	293	558	249	409	404	434	320	396	456	468	443	495	572	613	527	432	339	406	290	553	394	341	489	516	373	394	465	284	432	514
68	352	334	506	310	335	557	640	629	598	423	229	547	572	443	513	372	499	464	373	333	509	340	427	528	409	307	453	511	305	623	461	536	557	665	358	259	392	374	463	443	451	522	389	448	519	452	336	426	540
69	366	515	465	350	486	552	624	484	544	568	255	651	394	503	499	480	641	421	408	392	492	376	503	481	376	277	369	431	293	457	438	661	492	616	304	158	411	215	580	410	434	480	466	431	424	470	352	346	552
70	371	415	436	486	328	610	617	507	519	424	247	620	469	611	497	532	560	333	274	362	495	271	420	578	373	395	315	513	470	415	448	561	519	530	409	280	471	324	561	429	488	535	482	433	415	450	271	482	550
71	325	414	452	298	244	527	536	529	513	469	218	588	460	436	523	485	513	243	369	267	617	363	517	563	385	357	387	520	376	501	379	538	570	541	522	288	383	274	483	403	471	524	508	406	328	396	310	308	487
72	387	497	419	520	313	585	637	617	555	408	234	719	566	448	498	467	493	424	317	329	490	297	562	607	458	325	476	575	305	483	435	586	553	651	394	304	452	331	580	359	288	495	470	345	449	526	372	405	602
73	308	405	430	376	301	533	527	531	568	348	218	545	421	550	351	504	648	380	437	315	417	267	459	412	355	233	378	507	363	482	512	489	597	649	422	360	466	337	505	370	412	436	395	406	417	478	372	362	574
74	468	488	454	417	296	646	558	622	538	334	326	718	475	487	492	321	592	389	363	343	468	330	487	419	428	327	331	460	298	390	433	571	480	537	460	320	403	360	528	426	453	425	308	358	482	496	255	246	355
75	394	424	429	422	393	620	643	497	590	343	256	602	598	481	472	480	643	376	308	368	418	288	413	564	471	235	386	438	316	415	447	583	485	589	422	340	375	340	649	370	379	527	553	349	532	385	333	413	535
76	394	399	486	301	438	550	610	559	603	455	207	559	428	483	469	396	546	382	397	267	421	373	419	473	480	353	450	637	378	380	444	587	547	557	351	282	427	240	568	461	383	499	536	421	518	411	384	358	490
77	372	311	449	383	432	531	555	602	609	421	283	659	591	553	459	507	568	303	366	260	471	377	441	489	431	329	401	535	267	550	525	657	484	562	477	364	328	338	738	477	435	526	579	314	418	419	344	263	424
78	471	377	430	436	359	478	555	489	610	441	210	611	453	483	531	458	601	352	336	309	522	384	461	481	380	236	375	336	419	470	472	540	443	653	382	307	524	271	449	411	508	527	526	342	461	461	318	189	519
79	370	475	462	335	398	569	514	583	467	483	228	629	470	438	359	442	618	348	284	310	511	267	466	509	474	225	421	394	356	414	510	546	660	541	289	384	359	206	623	363	434	464	382	198	367	381	355	291	448
80	361	455	510	310	364	470	599	678	565	498	320	582	490	483	435	603	673	368	358	379	552	293	462	517	434	334	407	465	473	456	449	410	543	569	352	304	456	259	591	422	393	559	543	344	432	391	284	292	551
81	423	440	586	294	277	509	500	487	463	416	227	603	484	404	438	410	480	272	309	346	459	215	630	465	464	295	434	373	370	372	396	578	556	559	490	285	447	297	533	316	399	626	457	359	497	504	320	212	427
82	432	412	353	325	402	601	566	594	558	414	268	624	572	327	318	425	587	407	248	353	502	311	556	467	422	340	445	576	386	482	497	495	637	512	502	269	438	473	630	437	350	485	540	407	530	505	222	247	509
83	449	379	424	458	327	726	547	667	653	495	330	585	458	494	520	504	615	290	359	429	459	276	463	573	456	358	396	427	370	419	412	642	563	585	410	295	481	317	497	530	426	586	442	296	418	513	290	283	524
84	372	462	565	319	280	524	684	505	523	490	232	700	544	524	421	525	464	335	249	399	517	215	422	578	422	270	434	393	363	402	370	489	530	546	359	340	410	393	627	348	465	481	412	339	425	504	362	342	447
85	277	416	423	514	378	531	534	543	573	496	302	605	483	468	507	452	449	479	381	411	514	286	423	505	523	309	432	465	359	482	404	476	359	586	361	235	323	271	640	497	404	598	316	331	496	522	262	333	538
86	353	350	444	400	473	659	529	449	482	368	279	613	448	435	376	383	563	354	294	315	368	264	479	522	490	269	494	418	345	494	557	452	448	694	486	336	417	286	649	493	414	491	468	314	409	454	368	317	411
87	334	385	450	442	396	623	501	484	564	462	197	602	573	504	494	406	546	278	363	369	469	308	492	515	523	278	306	471	361	356	433	545	532	550	565	372	393	381	547	445	437	477	368	281	392	405	293	331	463
88	397	425	484	340	447	536	603	563	546	533	340	569	596	437	441	476	474	375	363	270	452	298	313	520	611	366	444	404	395	452	371	459	515	590	374	295	447	330	626	459	508	529	388	351	423	310	410	239	489
89	278	318	403	421	413	629	556	534	579	480	291	617	516	474	359	411	598	265	406	370	475	261	396	397	454	261	422	373	362	389	367	510	604	641	430	226	377	353	748	437	455	464	466	396	568	467	380	232	600
90	402	428	397	324	338	519	457	550	488	496	103	595	541	462	343	394	441	268	362	387	541	227	443	481	479	217	521	447	277	397	364	588	554	547	402	322	371	315	675	452	444	455	260	258	457	376	453	191	422
91	269	305	457	397	544	580	557	557	535	490	295	483	460	459	365	567	619	349	301	334	482	306	450	543	313	282	505	503	380	439	467	592	540	514	451	269	335	407	626	490	358	506	394	313	551	522	349	298	527
92	366	470	555	317	322	516	630	453	657	457	290	637	499	460	417	516	524	414	328	334	484	346	437	466	349	323	406	489	310	444	399	517	558	616	492	311	356	338	638	354	440	557	412	411	410	449	338	313	470
93	444	432	449	307	383	591	579	475	602	475	289	554	561	304	369	503	588	331	334	265	533	282	475	443	352	389	407	455	434	408	342	596	564	630	518	222	402	400	785	336	431	400	345	351	446	458	248	327	467
94	323	411	510	362	339	453	460	467	572	407	228	583	628	439	378	483	634	322	321	388	451	276	399	658	344	316	370	435	462	482	405	572	499	731	534	335	422	385	579	321	549	421	359	414	437	413	226	284	441
95	380	296	490	349	389	583	543	584	516	534	259	469	569	444	378	464	547	389	356	279	528	297	494	529	433	385	517	454	414	441	426	456	593	605	496	351	352	379	424	490	424	477	380	354	428	428	267	208	459
96	289	532	527	395	267	584	510	495	532	367	265	480	500	495	399	397	557	390	375	445	503	327	414	566	248	337	403	488	335	502	350	595	525	531	467	377	477	390	656	416	449	452	463	338	512	568	321	208	493
97	315	368	405	428	285	501	436	468	551	464	215	499	468	344	398	529	625	345	381	340	432	232	401	522	364	381	487	384	448	418	516	614	581	545	504	290	443	293	588	485	461	520	352	256	427	451	324	218	571
98	419	376	382	411	297	568	502	540	498	510	247	636	392	409	495	336	575	254	354	368	588	299	430	521	347	347	338	509	372	404	482	520	540	588	543	402	446	338	567	401	538	503	372	408	404	468	332	250	419
99	229	470	504	435	226	558	476	674	585	524	148	534	532	501	430	450	540	329	374	440	388	373	360	526	440	262	464	461	346	470	448	430	564	570	549	344	482	448	603	363	475	515	353	363	452	442	197	318	503
100	329	375	525	365	369	497	549	500	581	390	223	573	493	388	496	462	571	297	329	326	431	346	330	436	509	318	539	454	456	468	457	558	604	588	526	374	376	473	540	361	456	450	368	300	508	416	303	339	535
101	268	401	440	353	356	759	545	512	574	434	249	496	492	569	516	446	535	278	415	362	527	262	463	547	386	314	437	417	474	488	419	482	612	534	555	228	429	340	600	423	567	553	472	350	484	447	226	308	447
102	492	402	499	413	324	735	641	564	586	502	278	559	511	584	345	492	631	349	451	353	509	308	448	537	409	470	487	438	448	388	463	523	607	626	477	353	553	308	560	351	441	626	393	470	446	449	389	397	553
103	628	285	475	406	360	787	532	519	483	392	265	586	701	571	409	523	628	368	439	314	472	308	494	621	395	428	372	536	403	433	483	553	472	682	516	344	477	357	614	293	529	663	426	383	440	399	303	320	596
104	645	423	508	530	426	671	582	641	519	496	321	752	672	720	445	750	416	495	494	261	464	456	567	489	502	598	426	464	454	365	516	565	555	572	550	328	530	316	768	402	527	764	453	459	461	515	555	370	470
105	689	482	527	531	301	724	596	652	632	560	303	686	698	790	505	745	669	466	485	442	524	464	407	480	428	646	395	681	557	460	508	587	439	544	579	319	648	385	745	301	641	823	478	489	519	357	501	468	472
106	479	365	583	663	494	782	570	668	431	400	233	716	673	685	492	726	639	532	553	342	495	490	533	615	438	709	478	763	495	447	574	624	681	611	562	347	628	267	716	345	745	770	456	536	499	409	489	319	536
107	770	425	451	486	351	943	724	776	573	536	223	764	646	855	410	942	729	567	552	426	477	296	554	557	303	842	447	751	513	497	629	608	498	637	544	274	878	348	681	371	841	803	499	451	494	482	547	335	629
108	771	308	546	607	385	793	694	639	609	551	328	831	751	810	412	1005	758	430	575	314	468	424	442	646	269	806	461	816	559	402	659	610	507	579	595	334	825	380	667	396	761	773	634	706	505	437	457	408	589
109	839	294	592	655	482	814	591	594	428	627	347	807	767	895	398	921	700	596	526	435	470	412	603	519	364	861	491	784	754	535	869	591	651	586	661	371	628	372	664	442	895	740	551	624	438	461	498	409	606
110	847	406	601	641	564	838	642	745	714	688	283	741	826	913	375	963	749	664	447	431	539	571	459	507	473	840	470	697	668	372	659	692	572	614	710	445	781	403	830	380	900	812	545	565	539	436	493	434	613
111	813	255	642	773	291	886	632	782	464	737	378	899	747	883	463	970	754	624	701	297	445	483	464	644	473	756	394	926	720	477	833	506	628	651	742	335	831	364	673	402	929	736	556	737	491	406	616	496	569
112	876	437	613	565	364	872	636	730	575	734	374	900	701	916	458	1089	739	704	483	397	428	565	466	540	433	815	437	927	668	486	839	676	655	625	857	319	850	390	724	416	897	759	761	710	447	460	483	419	596
113	892	435	683	659	346	1055	557	700	589	658	332	820	827	783	522	989	810	781	505	411	516	553	459	674	416	903	475	871	759	400	764	676	591	658	769	274	761	544	803	270	902	972	628	758	551	418	490	369	623
114	809	477	720	652	449	896	651	804	507	760	281	750	848	740	397	974	702	596	673	355	418	458	400	672	460	839	484	1013	643	398	883	585	548	587	831	382	816	442	746	478	1143	772	685	617	396	489	502	517	519
115	864	425	653	647	382	907	718	762	839	744	349	955	837	738	481	1135	762	630	586	346	567	525	553	608	383	791	434	822	624	498	816	752	619	588	783	351	860	356	774	408	1015	778	658	797	456	541	461	466	619
116	800	402	651	589	441	791	657	761	686	658	349	881	685	917	456	1118	639	791	645	271	482	545	550	666	494	851	436	929	667	489	832	646	590	685	779	320	807	366	784	335	1094	806	712	836	512	450	648	507	564
117	783	379	649	588	533	817	712	703	558	663	398	952	798	879	363	999	565	723	493	292	562	482	573	694	376	774	543	1002	596	369	998	632	517	716	870	248	881	480	687	333	1138	866	752	836	584	463	427	409	695
118	797	470	645	665	325	892	687	791	682	754	520	836	847	839	414	1098	742	653	621	335	517	454	610	701	488	859	453	839	601	564	711	581	565	639	729	393	787	445	764	431	1104	899	671	746	461	446	518	417	645
119	850	496	640	531	314	850	542	718	553	755	318	767	839	906	465	1002	722	661	484	268	532	544	585	596	412	818	450	930	638	454	698	670	573	680	816	349	810	433	829	353	988	887	572	768	575	504	660	457	684
120	792	435	647	645	416	936	685	839	538	888	376	840	849	886	393	1017	695	688	619	378	451	446	400	587	482	868	537	993	667	385	889	541	654	724	910	263	826	389	699	412	1084	758	696	763	472	420	602	385	666
121	912	474	673	641	598	876	733	744	582	740	361	873	728	826	424	1156	850	677	552	403	494	433	497	724	392	835	385	829	609	324	701	574	553	576	729	294	735	460	826	427	1150	777	732	691	525	448	529	456	629
122	800	493	694	689	347	878	649	734	680	680	247	867	730	890	450	1056	731	635	696	437	475	568	512	678	399	918	381	1089	822	529	842	644	574	566	701	307	840	440	879	449	1220	866	636	773	479	448	568	424	645
123	735	554	646	690	427	927	716	710	585	739	386	818	774	783	554	1087	838	686	578	454	489	494	497	582	318	699	468	924	550	647	843	554	538	606	787	354	750	515	717	451	1072	888	646	735	565	384	638	487	637
124	832	561	620	542	437	912	618	729	638	818	353	862	843	906	580	1099	831	791	477	342	602	483	404	692	447	844	435	853	688	423	772	751	659	634	875	219	873	363	752	415	1243	775	651	712	488	476	513	517	604
125	802	508	647	731	256	771	513	695	712	836	299	803	749	845	483	1026	771	756	625	375	529	443	528	717	441	726	520	853	725	463	791	568	561	578	827	339	762	392	652	376	1102	902	669	731	529	483	424	409	595
126	835	502	696	621	266	802	613	662	797	847	384	835	744	817	480	940	750	585	472	397	583	448	478	583	483	875	501	938	584	512	917	714	657	599	871	394	905	344	787	415	1178	821	720	783	587	384	468	493	464
127	822	526	698	660	315	882	580	757	635	772	359	869	625	894	567	1151	861	589	673	319	456	522	464	658	360	712	443	837	664	403	799	618	619	657	861	370	810	364	652	401	1024	825	703	599	495	395	756	516	570
128	824	466	751	713	474	937	573	692	588	774	337	946	792	956	627	1018	849	644	631	351	487	518	484	718	404	762	467	904	631	479	800	677	634	646	870	307	865	411	738	256	1130	937	623	787	512	408	453	427	552
129	773	492	671	703	523	763	659	673	673	835	384	886	869	948	498	1106	715	723	695	327	487	576	361	615	357	751	367	902	771	512	855	510	704	660	711	376	852	465	614	342	1145	762	685	493	486	430	549	534	602
130	787	550	695	534	449	859	636	843	782	758	361	886	715	924	522	1109	857	642	505	320	436	595	426	574	365	761	419	829	715	523	897	741	605	644	817	293	813	497	677	319	1102	794	699	800	529	390	608	342	613
131	792	532	723	575	372	857	664	760	640	692	354	887	754	864	444	1114	719	629	677	432	524	639	537	552	364	770	439	968	603	435	768	618	675	601	769	290	791	425	735	372	1186	760	745	647	606	360	485	382	537
132	791	548	639	576	396	831	655	751	531	738	448	870	606	953	556	1164	750	659	538	256	637	520	467	588	394	782	578	913	663	408	776	649	649	637	715	377	766	465	703	372	1027	1003	747	713	526	477	428	439	502
133	877	587	773	670	404	841	752	732	661	871	334	930	558	929	553	1173	932	739	474	356	409	597	473	521	393	775	433	931	628	384	802	661	557	538	708	374	899	394	763	350	1175	887	646	706	550	502	493	527	567
134	890	532	615	651	325	796	605	752	517	739	484	1009	635	1055	582	934	874	735	503	366	551	516	525	644	462	931	465	909	587	457	806	641	532	668	772	362	884	402	634	280	1093	714	684	574	605	489	504	417	595
135	795	544	655	574	418	787	716	838	636	721	480	1017	685	695	578	1120	826	670	525	348	466	472	479	556	397	773	519	871	659	468	864	771	606	769	780	475	908	405	825	372	1273	850	663	657	498	434	438	447	604
136	748	516	667	658	282	902	703	661	598	791	432	900	632	849	611	1134	762	707	642	462	441	555	501	634	437	859	421	950	524	472	763	632	536	685	845	371	816	444	798	357	1067	796	596	634	430	389	526	477	569
137	826	451	713	619	417	736	723	850	657	749	430	814	640	961	817	1074	807	625	589	270	533	574	616	602	365	795	486	812	437	434	796	608	633	624	872	288	786	373	875	335	1131	1010	577	629	484	517	515	538	500
138	843	555	651	671	446	859	734	704	406	589	511	800	690	920	703	1050	932	641	595	396	455	388	533	704	374	825	440	987	577	433	806	495	634	720	872	240	814	420	871	297	1126	842	567	573	512	377	501	563	509
139	770	469	662	742	219	748	566	796	564	724	478	826	703	825	632	1042	742	651	593	315	503	633	612	581	417	762	439	830	557	466	820	666	461	575	849	358	833	424	763	380	1162	989	730	669	524	478	480	529	660
140	780	501	770	661	239	924	590	710	626	750	405	800	603	877	782	991	835	749	519	378	364	629	400	611	348	905	503	867	755	547	726	494	566	612	782	369	844	470	945	373	1183	835	780	635	545	397	545	678	519
141	831	433	681	726	395	751	764	750	658	681	386	926	692	963	684	1032	704	737	506	321	507	599	488	600	403	816	464	867	678	455	907	626	674	645	910	248	784	404	848	422	1036	912	741	583	690	396	569	601	687
142	876	553	663	659	314	766	774	669	723	761	444	930	748	828	714	1144	781	693	602	327	482	501	622	679	400	667	416	830	636	400	729	659	746	696	826	402	858	468	948	403	1012	813	708	642	579	520	495	640	534
143	805	621	659	581	319	715	648	892	615	840	476	940	672	1024	809	1082	713	664	576	373	449	625	529	721	450	731	459	787	649	426	920	556	627	669	811	317	843	487	836	428	1015	822	669	644	464	525	639	557	472
144	883	529	592	693	469	830	710	671	567	806	401	776	627	914	872	1006	715	628	626	354	546	687	534	706	442	804	455	899	631	488	895	641	641	719	784	366	809	326	877	293	1059	914	711	689	571	559	592	653	505
145	707	580	547	611	554	830	630	868	684	879	537	799	646	993	748	1088	684	606	536	346	408	551	529	668	402	795	421	878	650	474	844	591	652	706	750	273	827	520	1009	276	1036	865	681	633	560	422	653	538	461
146	903	538	801	570	403	869	588	766	677	796	397	866	631	979	812	1061	723	587	680	379	517	542	582	564	339	853	481	881	603	414	827	628	606	765	841	301	839	500	925	421	1020	835	725	740	638	380	649	594	468
147	758	510	781	617	305	755	635	806	535	775	401	875	699	982	779	1087	805	679	580	354	606	537	574	645	401	865	438	777	685	398	767	644	600	718	861	271	821	425	773	475	1106	959	658	603	558	414	512	744	586
148	834	641	609	644	490	892	668	673	729	691	455	854	605	1039	756	1032	755	625	638	313	362	530	599	549	300	827	350	877	660	381	848	638	614	756	889	399	825	448	823	337	1105	785	804	643	617	520	506	633	631
149	772	489	589	715	447	821	635	635	588	692	425	959	726	924	758	1049	743	679	656	324	564	488	638	612	403	780	443	831	652	464	943	599	556	684	951	150	846	400	819	367	849	862	751	665	469	428	546	524	563
150	818	508	586	697	364	723	715	768	714	831	439	835	569	894	817	1152	651	553	493	285	463	508	639	635	368	843	471	844	607	475	892	540	638	718	889	264	971	440	699	405	1170	821	692	651	532	479	549	702	644
151	876	501	586	568	414	761	559	751	577	688	456	843	622	1014	760	937	769	573	568	418	491	647	538	561	417	889	418	791	596	467	789	616	669	724	835	290	847	409	739	415	990	821	495	684	637	461	492	547	593
152	878	464	634	695	396	751	544	768	620	730	604	859	625	787	711	1043	755	651	528	321	417	604	609	658	420	762	543	737	618	414	777	669	611	814	800	322	881	367	845	387	1139	752	564	614	721	464	532	565	447
153	770	493	663	568	366	969	620	804	765	756	517	900	657	888	808	1100	694	594	485	382	490	594	455	507	500	842	405	811	593	389	780	593	580	574	788	302	822	352	801	435	1067	938	637	764	498	513	506	625	473
154	760	578	612	668	381	889	603	727	631	728	478	828	730	956	778	1114	731	556	544	318	450	522	570	664	442	832	496	802	562	490	794	614	653	571	857	312	796	380	838	335	939	810	642	658	597	478	507	673	584
155	662	493	733	565	386	1000	729	748	710	750	497	919	761	897	777	978	600	622	597	365	369	576	612	646	480	816	450	816	594	389	879	607	649	693	902	356	850	419	909	310	1030	881	689	695	596	397	552	591	521
156	795	588	566	637	341	884	715	792	648	759	543	821	667	1036	790	1106	776	685	446	410	483	482	725	663	396	881	423	908	589	443	875	710	718	694	770	390	912	385	784	419	1034	887	711	656	696	366	507	579	555
157	860	525	606	670	364	904	615	716	686	855	330	779	664	1190	735	1274	766	617	461	444	568	545	558	534	413	817	441	814	583	570	928	701	648	691	851	334	944	468	910	278	1015	777	624	716	617	410	482	699	561
158	680	530	595	671	358	863	635	755	746	715	373	836	727	946	757	1058	816	621	508	280	370	499	590	451	377	920	555	900	531	527	897	615	548	655	754	334	846	448	738	407	957	778	633	594	559	474	505	674	532
159	786	544	680	588	437	950	666	706	648	763	511	839	741	1111	821	1031	682	591	689	348	490	528	592	704	380	841	473	814	664	457	771	544	537	569	744	383	879	520	778	421	1025	880	747	572	552	487	604	646	506
160	738	465	675	700	432	998	714	782	682	798	490	843	636	978	827	1061	756	620	559	412	494	564	661	646	408	739	343	871	513	491	982	663	757	676	951	353	802	410	973	344	1072	883	523	621	525	394	558	710	499
161	699	423	534	561	376	797	536	758	765	813	411	816	701	1034	746	1182	730	594	670	374	451	493	716	656	433	868	391	804	616	447	832	539	661	694	747	392	879	405	810	441	928	937	614	637	654	478	565	579	492
162	788	460	655	688	462	976	663	762	642	787	509	844	653	983	737	1012	664	536	457	448	462	606	625	642	401	744	337	676	557	434	780	664	694	685	749	426	901	506	938	391	1058	805	677	659	502	388	511	574	526
163	693	625	666	687	247	852	635	789	450	741	373	834	583	876	814	1098	667	568	515	402	425	602	577	603	418	884	454	826	527	449	932	710	597	782	737	308	873	508	713	371	984	938	669	614	638	485	548	666	575
164	946	597	614	624	402	909	746	709	620	811	407	903	647	1041	754	929	719	653	477	326	495	606	629	696	366	863	513	908	628	403	816	657	557	774	759	225	972	336	759	396	996	764	705	655	536	492	444	577	604
165	804	475	498	670	524	948	580	796	604	627	465	854	540	951	666	1146	675	592	596	375	477	569	538	585	436	725	366	879	512	450	783	609	597	787	762	366	794	380	889	385	973	874	648	621	681	437	527	588	516
166	687	592	606	643	418	755	683	768	645	686	463	855	603	883	859	988	671	670	577	419	414	577	558	639	382	816	415	892	571	539	844	606	641	606	822	270	776	497	873	423	1025	812	713	661	532	385	584	561	463
167	776	517	597	595	508	891	626	657	691	693	465	934	711	927	699	1012	797	568	575	590	362	536	614	560	383	893	414	755	540	504	835	720	578	749	851	366	835	434	696	431	882	839	571	558	673	436	539	645	466
168	814	513	646	638	500	965	798	752	621	766	448	868	727	975	763	954	666	678	510	401	496	655	513	627	391	796	467	826	606	520	777	639	584	728	858	368	795	494	849	473	1050	795	622	625	589	392	576	630	528
169	796	547	540	533	274	773	668	644	613	802	533	887	715	916	828	930	614	617	542	421	544	548	548	632	492	811	452	703	581	520	763	679	548	741	755	263	823	367	636	285	1062	827	558	631	629	425	563	609	622
170	766	515	752	599	311	817	757	681	654	738	655	767	654	931	859	972	778	645	537	338	530	594	479	648	400	798	464	909	526	500	850	585	671	706	749	318	805	482	802	321	1027	851	577	554	678	503	498	498	467
171	823	464	677	660	352	913	590	635	596	709	468	766	686	1002	703	931	713	459	544	340	432	569	628	541	467	830	502	791	572	462	815	559	596	644	823	303	821	445	894	397	1037	840	640	537	605	443	608	557	501
172	868	484	726	666	465	816	495	772	753	713	458	923	583	789	744	895	570	544	590	411	480	729	522	653	336	817	405	983	510	442	765	540	658	660	834	281	803	542	775	405	1064	850	671	701	569	536	490	603	684
173	766	537	615	606	298	770	613	667	565	751	474	827	743	981	789	990	684	636	673	391	506	523	540	618	423	822	366	903	597	477	928	511	747	741	839	283	927	334	905	392	893	767	516	574	618	492	480	450	577
174	661	496	547	601	389	818	745	840	520	953	425	846	558	955	729	926	601	504	551	436	562	488	539	448	438	851	545	821	572	550	826	619	722	618	817	235	855	464	871	485	914	830	584	585	620	407	555	474	463
175	763	544	668	655	458	820	735	794	524	782	509	941	691	964	784	877	606	611	540	292	459	650	461	603	386	912	418	883	519	484	979	680	592	747	912	410	858	437	809	366	985	717	520	534	618	490	449	362	465
176	784	509	668	680	566	804	610	816	545	817	560	865	725	885	689	914	671	557	607	440	601	530	584	554	348	798	469	838	574	473	806	579	576	620	841	370	965	434	782	313	959	860	694	551	491	501	594	534	457
177	735	601	623	585	425	859	628	823	581	705	437	783	519	904	761	1101	479	606	524	337	464	523	489	532	358	919	406	862	494	519	817	734	556	789	815	262	1011	389	891	449	966	834	672	562	630	342	544	613	563
178	623	606	659	676	441	807	705	630	558	802	519	950	614	816	734	1123	607	516	458	365	604	588	692	643	478	891	420	910	622	470	978	678	606	671	846	409	990	447	778	436	1055	749	569	468	525	541	474	501	616
179	883	492	722	768	272	805	673	741	548	808	487	817	666	993	730	1061	696	558	497	411	492	564	480	628	390	833	490	776	519	485	945	551	735	680	686	303	745	475	880	443	1075	902	580	464	615	496	447	658	529
180	682	500	738	551	479	900	685	710	567	792	394	874	660	836	678	1217	514	601	608	544	497	557	502	614	477	812	418	889	592	404	870	602	678	663	700	298	774	279	730	441	827	901	521	702	605	347	627	481	495
181	676	638	575	704	343	806	647	755	457	713	506	905	606	865	690	1123	667	670	583	496	494	557	569	564	425	765	389	841	503	417	830	626	639	617	754	335	780	507	731	303	954	890	531	721	562	592	494	582	622
182	682	494	744	591	272	812	647	760	591	805	545	807	648	1022	790	1234	615	577	572	547	443	544	642	656	472	858	513	897	619	550	856	615	678	675	757	306	883	485	651	456	967	814	650	691	561	470	526	560	500
183	864	475	707	674	370	869	615	758	517	849	510	845	764	729	722	1124	584	509	574	408	392	665	675	659	466	742	409	835	582	404	826	542	738	680	598	367	852	545	792	381	1004	755	678	585	540	451	506	630	525
184	783	452	675	667	285	893	620	574	673	888	513	858	746	949	776	1053	628	606	529	414	404	658	454	541	394	855	463	867	601	399	835	757	708	625	724	407	748	463	823	374	980	738	575	786	654	443	518	548	483
185	648	626	741	719	325	820	642	722	545	835	475	806	649	867	818	1199	638	582	423	468	518	472	632	646	329	815	416	766	656	586	694	725	721	624	679	304	822	421	752	439	873	660	674	679	584	466	530	561	599
186	662	521	600	601	329	939	637	781	677	823	475	778	716	948	705	1085	590	621	587	421	450	554	523	600	495	882	502	776	555	418	835	613	743	733	653	297	869	412	796	422	1004	741	577	616	700	493	442	385	629
187	715	468	683	646	217	813	674	643	697	901	501	820	667	924	699	1204	617	569	484	428	411	598	519	541	367	947	447	793	484	475	823	634	713	708	748	273	783	485	836	471	805	807	688	564	651	381	539	448	554
188	769	543	601	679	443	865	708	802	472	897	490	812	635	822	837	1005	511	479	577	390	523	489	548	603	411	794	410	913	683	555	790	556	790	657	701	311	727	345	658	315	1066	828	650	501	598	472	605	396	500
189	787	537	627	635	568	817	668	644	537	713	458	794	649	874	835	1131	695	629	625	392	535	515	479	597	370	788	465	903	551	486	890	674	674	614	567	282	726	457	703	492	1085	927	662	545	547	427	595	478	585
190	810	493	593	721	563	729	686	738	555	770	417	765	734	838	791	1098	488	445	546	439	408	542	525	507	434	785	453	823	672	490	786	566	660	777	540	332	791	442	806	382	1049	719	596	624	618	430	519	383	548
191	720	516	673	598	556	757	704	742	559	826	475	790	586	824	850	1167	525	482	530	587	488	529	548	585	500	807	441	904	574	432	701	546	618	743	575	309	646	398	686	287	781	760	559	639	469	435	538	579	512
192	686	527	748	636	433	847	629	797	644	700	539	891	648	951	814	1003	664	571	475	414	548	514	552	547	396	749	561	797	563	490	715	650	608	787	635	218	447	493	886	382	1132	669	568	689	551	379	409	503	553
193	705	502	595	610	224	800	582	731	504	796	424	788	613	925	905	1082	577	510	445	414	491	740	495	628	528	808	429	848	561	451	797	601	726	834	623	413	480	473	778	445	813	787	679	700	542	501	508	604	504
194	772	518	682	555	368	780	691	694	560	739	515	831	598	846	865	1005	581	610	492	455	364	641	493	558	459	741	343	865	616	495	701	647	819	725	576	319	721	377	749	383	889	805	614	610	593	438	534	539	666
195	832	487	576	696	418	765	575	670	557	766	466	819	631	938	879	828	614	498	622	349	482	528	602	633	422	760	458	812	637	468	601	561	734	694	513	256	789	380	819	396	1035	871	676	550	612	432	499	543	617
196	710	474	591	657	300	814	620	695	540	754	414	748	696	897	904	946	589	571	470	454	497	568	540	539	420	891	413	911	683	526	759	623	768	535	691	323	786	431	814	347	740	715	623	641	574	375	572	437	543
197	846	525	656	681	325	835	531	695	554	879	446	886	607	804	785	937	580	615	580	471	421	686	602	587	485	730	459	789	569	427	845	654	680	631	582	344	768	365	742	432	944	943	638	496	445	475	536	498	500
198	607	473	652	482	263	776	683	739	659	765	440	851	521	1007	926	929	694	599	504	477	404	401	496	576	366	807	445	779	461	339	792	651	650	582	550	304	926	302	796	431	790	677	626	652	478	408	513	380	517
199	604	402	624	628	715	799	658	666	678	819	486	846	610	981	776	1018	472	570	538	463	414	612	587	521	408	838	336	793	538	482	707	637	719	728	513	446	773	342	722	415	1080	831	688	582	492	386	475	550	607
200	746	472	660	612	391	830	632	729	584	751	472	894	658	979	829	785	494	546	490	477	434	643	522	601	447	869	523	814	509	514	718	611	583	697	498	277	885	342	748	383	1041	823	708	461	555	448	617	525	475
201	787	433	724	613	484	828	565	633	555	689	426	855	776	949	853	938	530	551	576	419	510	572	451	518	413	698	307	851	494	476	712	663	647	604	544	341	722	481	803	381	917	869	614	606	480	426	593	404	556
202	798	502	728	451	494	868	649	723	607	828	380	786	639	855	848	869	596	480	483	434	470	528	470	520	419	745	376	749	582	527	571	692	605	704	502	256	763	522	710	511	1052	730	616	653	543	417	425	487	592
203	724	446	598	566	381	777	617	774	641	760	397	837	720	849	788	875	655	486	584	428	473	503	506	540	402	875	402	692	650	510	581	633	586	666	615	303	739	385	724	327	905	627	611	616	530	453	486	426	627
204	783	547	561	558	245	927	639	664	631	716	437	818	761	761	783	901	553	622	475	541	507	611	534	533	400	747	431	711	510	541	585	667	834	497	583	339	679	422	753	433	906	524	623	523	479	487	480	460	529
205	712	523	631	578	347	825	562	787	643	803	367	776	698	838	755	814	702	542	573	457	465	610	546	540	406	811	430	717	578	459	693	670	571	732	528	325	685	434	659	481	935	678	631	568	544	468	555	443	474
206	784	492	589	511	325	853	667	697	504	803	366	768	765	877	838	738	483	497	456	489	536	475	536	581	447	703	402	747	495	439	647	675	695	615	500	182	738	416	729	335	822	685	587	653	637	396	372	452	573
207	598	424	575	462	456	783	562	713	470	756	449	866	603	702	688	766	675	521	409	393	428	423	460	606	479	790	362	732	416	407	602	531	591	561	553	224	626	462	770	329	821	658	572	499	578	339	530	572	358
208	622	458	702	477	323	876	698	666	608	693	457	807	666	796	644	803	557	503	487	466	521	529	389	504	414	670	466	702	426	468	519	690	618	512	415	256	739	344	648	385	809	611	487	536	582	466	460	320	317
209	716	374	645	599	325	820	555	661	605	713	435	676	620	651	744	730	519	501	456	472	550	554	583	472	392	644	396	719	502	534	507	586	631	638	536	289	581	342	691	438	851	661	462	644	590	447	516	542	441
210	589	424	670	562	361	803	548	767	607	755	340	726	630	712	803	787	559	498	531	374	492	597	431	506	408	713	456	712	497	524	565	682	558	592	532	329	708	439	641	284	929	707	616	550	578	485	479	503	521
211	723	447	629	386	405	788	545	693	526	519	386	731	565	723	730	782	539	502	432	451	439	456	456	574	452	554	479	634	381	548	626	503	501	637	555	270	620	349	640	364	804	747	487	638	646	490	471	485	345
212	511	290	575	483	445	711	567	694	488	766	319	703	680	697	738	725	590	478	466	437	409	680	434	494	371	609	454	548	465	535	474	551	716	611	380	264	658	318	585	340	673	586	553	536	485	447	450	344	505
213	534	470	593	530	421	699	541	726	565	570	398	655	614	744	701	665	471	469	503	397	442	459	386	471	376	496	462	640	546	382	598	609	573	623	532	255	645	463	627	453	635	614	510	440	599	404	500	450	464
214	572	355	599	497	545	762	642	579	533	584	302	567	475	661	665	514	473	458	432	418	575	481	405	582	400	669	461	737	468	508	521	515	661	556	445	252	596	401	659	445	592	613	494	568	598	499	412	422	435
215	582	364	452	478	445	723	508	679	481	598	318	630	509	633	706	606	425	446	389	472	425	571	550	572	448	544	436	714	286	490	471	497	568	560	543	244	516	333	617	395	663	553	467	469	546	399	417	371	538
216	616	352	532	503	395	748	557	630	491	569	402	593	562	688	714	558	431	443	490	494	536	527	367	460	408	608	329	563	384	472	463	484	689	626	397	262	622	310	547	443	672	522	536	400	521	398	430	350	426
217	558	407	525	669	476	700	518	556	483	645	298	605	514	665	625	598	496	478	437	473	484	523	387	461	397	612	435	575	508	399	489	449	540	652	442	373	603	311	646	317	711	672	508	478	481	403	379	483	464
218	367	349	537	575	426	608	579	625	587	517	280	616	478	670	645	469	503	441	427	413	564	417	390	514	400	577	431	606	438	448	437	583	562	734	532	259	535	349	720	361	574	543	427	489	628	423	365	369	400
219	393	331	471	439	318	713	568	603	546	569	365	525	629	554	691	582	473	435	464	334	455	506	449	503	366	647	442	558	402	454	537	521	566	593	407	387	561	318	560	400	721	522	384	399	579	433	411	429	553
220	495	313	533	339	395	641	590	588	419	591	340	511	589	635	769	632	456	469	479	472	386	458	469	423	415	449	427	712	342	418	565	564	479	511	472	355	467	386	470	417	633	663	440	476	483	432	443	340	461
221	459	393	512	482	489	628	577	660	503	594	253	608	586	639	589	612	471	397	370	352	436	481	481	425	373	563	369	605	463	469	465	511	593	637	447	398	573	383	601	379	524	603	402	322	539	375	506	339	477
222	444	342	529	436	397	680	519	566	426	573	280	537	516	655	552	579	557	484	394	500	486	407	437	485	482	561	393	536	284	325	480	541	402	559	491	241	512	229	665	345	586	488	476	477	650	411	340	389	496
223	464	321	626	493	300	621	535	530	539	559	266	510	418	553	636	596	510	476	387	403	603	557	421	375	490	525	372	575	350	456	379	505	551	647	546	284	441	248	423	487	607	645	345	400	480	384	433	392	492
224	396	271	478	543	262	613	624	620	555	669	288	561	552	767	603	496	455	467	534	427	482	456	426	350	402	549	343	577	509	450	539	638	618	665	355	262	514	312	630	359	543	404	384	403	651	371	471	324	492
225	507	346	468	480	423	617	595	628	536	608	316	469	516	625	499	611	404	389	378	460	427	328	470	513	406	572	414	651	409	573	442	586	567	644	522	343	537	277	722	393	595	496	432	354	461	458	412	263	415
226	403	293	492	455	246	548	619	594	521	546	195	412	570	577	534	509	372	452	421	411	483	425	405	388	406	447	506	514	489	475	438	603	515	554	407	286	480	366	710	433	630	546	348	405	550	467	381	336	517
227	435	520	392	371	430	570	646	614	397	539	272	529	688	616	629	402	487	519	434	454	414	418	378	546	345	450	352	411	367	412	493	575	590	442	384	235	457	370	647	439	555	577	427	334	511	522	381	344	374
228	480	386	520	391	279	615	573	701	463	555	364	502	582	556	577	578	415	447	404	457	483	376	415	515	359	526	471	644	339	474	597	496	606	643	412	296	451	367	516	451	584	514	424	333	525	394	410	332	482
229	356	395	558	263	358	705	656	604	391	612	265	493	562	589	595	447	371	503	331	437	471	385	318	350	484	588	325	573	396	533	480	489	511	712	464	246	395	303	562	458	494	499	377	428	501	497	460	366	554
230	387	462	452	404	464	591	576	583	622	462	278	475	568	471	581	460	337	436	373	399	438	482	420	415	447	474	436	523	344	397	477	421	611	481	434	343	419	230	558	487	628	593	422	414	594	444	428	287	419
231	415	358	544	415	263	600	459	575	612	502	210	571	596	526	528	440	432	344	429	488	464	398	396	480	235	462	456	523	390	375	380	444	538	685	467	267	377	314	494	478	488	521	473	418	574	480	314	173	576
232	385	453	553	344	391	553	653	614	567	468	245	479	527	581	438	506	528	396	353	434	528	374	274	386	453	363	339	474	387	473	510	514	612	535	384	263	370	301	515	398	508	464	410	418	489	417	295	343	472
233	581	341	578	380	430	581	601	733	569	469	452	398	453	482	577	553	520	418	308	470	523	407	372	476	409	558	415	599	321	504	579	622	596	663	512	265	414	349	573	471	473	483	427	429	488	502	570	311	457
234	409	356	496	353	376	655	603	497	633	501	316	459	475	525	562	513	439	515	447	407	453	429	455	445	262	497	375	509	439	563	399	475	456	599	475	389	431	262	568	375	440	487	417	350	488	377	478	337	365
235	368	206	501	411	426	523	531	573	590	520	296	544	610	504	643	416	542	400	350	367	534	388	423	610	364	331	365	487	341	458	415	567	561	640	526	300	427	243	496	412	473	474	461	369	476	486	359	267	568
236	346	352	470	438	406	523	576	614	542	419	339	446	501	601	450	437	461	411	205	443	445	401	361	346	355	505	433	525	280	472	387	576	483	585	431	303	466	289	523	502	477	356	295	380	583	507	371	285	492
237	513	314	403	430	386	587	458	495	539	371	275	422	552	498	505	381	400	456	348	438	453	375	325	500	336	421	367	545	416	508	371	568	518	542	406	381	348	265	490	384	474	432	354	413	536	429	389	230	470
238	480	405	483	414	497	555	581	622	513	429	290	429	437	510	511	452	485	357	372	294	463	421	349	459	292	412	518	506	349	454	405	479	461	637	525	293	447	275	683	343	344	486	430	398	480	428	399	364	384
239	358	374	411	400	384	581	512	551	534	449	369	357	572	633	586	507	515	418	346	438	450	331	318	456	419	317	385	520	365	470	367	582	604	645	373	382	527	288	554	384	512	487	335	562	502	397	303	300	351
240	464	363	456	421	387	381	430	617	554	421	306	360	465	538	520	414	397	419	497	551	457	473	368	431	474	403	404	608	469	548	470	659	501	710	446	260	407	242	477	499	507	437	434	349	521	520	348	341	409
241	411	392	423	351	319	470	542	578	474	574	322	534	590	461	510	511	464	379	315	435	547	423	352	424	403	337	586	530	354	402	383	575	523	664	471	295	463	225	538	489	368	419	417	369	437	381	454	306	351
242	301	359	396	325	237	453	580	658	490	584	235	445	619	661	642	555	565	467	392	546	417	429	347	493	462	370	419	591	375	453	442	585	457	731	422	340	403	302	580	344	490	438	356	427	528	426	422	343	437
243	412	287	568	328	439	556	479	672	488	362	291	414	486	567	575	457	527	395	377	469	461	394	315	412	438	344	443	469	396	477	383	563	636	606	480	297	474	255	636	562	478	400	458	388	548	404	306	339	493
244	386	350	482	380	504	527	638	626	504	402	227	550	442	565	475	560	459	475	407	411	440	472	330	372	388	401	480	470	452	517	420	500	640	599	415	447	415	215	514	368	490	526	425	473	491	518	369	248	418
245	365	364	513	359	361	549	503	464	492	492	254	548	422	536	497	424	436	436	388	388	598	358	360	465	406	362	500	415	318	627	471	513	504	545	447	236	379	254	537	516	365	466	301	489	460	418	402	329	511
246	230	343	500	449	376	398	687	534	519	371	335	383	530	515	551	455	454	418	393	364	448	384	324	492	472	300	357	593	377	538	356	441	509	530	379	209	373	287	603	459	416	425	382	391	519	459	459	372	318
247	306	326	574	463	392	430	544	687	490	454	268	387	545	542	554	368	357	449	290	452	481	421	319	344	400	361	445	457	430	582	488	558	451	525	475	245	389	375	606	486	439	439	319	436	508	441	386	310	529
248	287	369	493	353	368	437	476	529	463	485	262	517	476	647	621	395	388	512	363	441	531	466	219	352	411	325	410	426	389	565	302	565	550	488	440	266	525	246	635	349	443	389	373	481	504	530	439	276	465
249	252	353	392	333	319	501	499	602	636	364	197	462	480	485	535	420	547	364	362	472	460	364	340	398	419	345	506	539	352	507	529	508	617	583	344	328	475	216	547	455	364	495	428	499	532	513	460	384	499
250	441	396	445	365	532	480	420	566	526	511	243	364	627	563	472	483	478	357	419	560	510	286	397	495	540	214	441	552	296	509	451	571	544	622	471	280	424	287	630	395	491	552	465	344	462	405	441	339	456
251	289	389	594	411	477	375	576	576	558	387	242	451	708	404	476	406	441	381	399	427	523	301	297	438	389	400	461	568	281	679	342	515	588	666	408	291	410	312	611	431	441	457	362	315	489	479	331	274	437
252	323	314	416	323	359	416	574	615	558	437	253	428	440	536	496	445	477	451	401	478	437	403	367	396	453	384	445	497	445	413	409	534	456	570	553	246	486	274	519	382	371	485	370	481	574	388	367	265	318
253	276	407	384	404	254	454	576	498	489	476	343	492	491	585	488	502	402	411	362	463	439	336	353	498	407	245	380	465	451	594	422	469	601	562	456	350	421	127	491	409	412	417	342	281	507	471	352	248	491
254	329	280	433	399	276	493	488	539	609	375	247	339	533	487	475	422	473	402	331	476	444	373	420	288	362	292	365	509	414	547	372	564	547	500	447	318	368	366	552	550	441	492	381	435	603	500	325	306	476
255	425	324	441	296	298	428	511	593	491	430	333	454	472	521	517	562	548	311	272	413	468	371	231	310	312	249	420	557	327	580	381	559	537	585	371	257	302	301	660	479	477	367	279	477	637	406	360	305	448
256	403	261	519	396	347	453	537	589	499	491	389	291	426	617	511	447	429	398	372	485	437	363	319	471	317	321	405	434	360	659	412	519	449	699	383	256	361	303	622	484	470	467	332	448	548	411	332	263	554
257	397	296	582	426	366	436	556	446	687	507	294	388	456	577	460	478	533	342	323	434	349	319	280	398	348	294	438	448	325	516	316	409	531	601	374	318	333	237	610	400	460	513	328	337	442	411	415	289	512
258	233	395	468	372	383	401	542	544	531	526	261	491	532	598	524	552	404	517	407	576	513	354	333	507	307	329	449	413	331	582	539	484	384	518	416	287	401	286	589	313	459	403	286	429	391	369	368	258	638
259	351	340	409	329	217	365	551	592	576	331	248	427	497	509	554	440	395	320	173	425	525	335	511	452	407	207	435	585	297	573	529	466	583	609	309	219	336	221	502	455	470	535	397	390	489	402	352	284	433
260	366	321	440	334	246	329	587	591	538	462	227	449	468	477	470	497	594	379	357	425	625	325	405	528	310	376	450	448	333	646	426	523	532	602	475	365	382	241	674	427	423	433	342	502	496	496	451	360	439
261	257	295	521	353	388	336	595	589	485	379	281	380	440	536	504	467	573	407	278	504	422	438	385	581	300	247	341	386	395	590	528	582	621	611	318	290	429	305	466	440	433	368	349	348	761	413	314	442	457
262	274	281	455	407	294	443	434	493	512	405	265	465	332	503	544	535	489	415	405	384	491	403	346	368	437	275	352	493	355	466	425	640	615	625	449	283	366	252	545	506	518	510	383	478	562	423	270	409	353
263	330	373	399	386	264	453	500	666	522	457	273	467	522	557	479	472	611	459	356	460	563	432	281	335	367	319	333	436	289	511	409	514	524	604	380	308	376	415	537	503	541	404	400	422	609	504	393	378	507
264	336	374	367	408	350	440	647	538	453	364	193	455	599	452	521	460	489	443	352	431	475	296	309	546	482	278	542	517	428	635	434	518	538	578	395	263	378	278	535	584	532	494	241	398	501	448	268	283	430
265	203	388	397	403	318	429	681	615	477	377	198	404	519	439	373	442	497	445	329	407	421	450	366	482	444	197	399	482	324	485	447	605	497	482	466	334	356	366	557	390	449	520	296	433	486	348	330	280	433
266	331	339	505	477	400	478	518	562	556	459	293	472	299	468	551	403	572	394	273	389	465	327	337	359	327	332	484	368	296	691	474	411	480	469	384	366	418	346	504	299	434	480	368	365	533	417	456	331	477
267	272	349	412	345	463	465	615	497	515	434	250	545	456	475	449	350	437	468	243	247	388	374	366	385	293	242	370	472	391	601	453	507	578	476	447	268	338	263	419	334	458	527	322	396	558	402	321	244	351
268	377	276	402	397	457	475	635	576	495	341	258	363	360	510	457	427	490	367	331	462	373	350	235	309	318	292	385	456	366	724	486	573	580	577	527	282	371	340	523	408	461	448	265	334	630	535	427	369	430
269	284	355	466	390	363	459	561	592	584	411	195	490	336	523	494	409	531	366	280	432	573	303	277	559	425	226	403	354	454	790	444	496	557	622	356	253	362	223	554	455	564	485	305	384	552	417	430	279	291
270	409	284	507	437	395	339	541	583	611	302	244	389	317	437	363	482	556	507	395	342	531	383	326	541	341	335	338	478	330	501	470	513	441	660	425	267	413	341	513	438	543	409	222	395	660	406	321	274	412
271	336	320	355	365	243	326	478	598	469	466	276	459	375	451	474	572	567	464	358	548	439	297	209	530	359	318	565	344	269	595	471	490	581	602	475	227	284	280	501	464	414	462	266	320	549	402	312	292	544
272	485	371	457	338	180	372	524	511	486	398	213	581	329	566	584	401	505	468	387	460	442	313	266	496	292	337	351	463	332	632	448	538	496	690	451	265	435	363	589	396	461	444	276	277	575	446	339	329	489
273	249	326	343	397	418	444	604	391	476	412	334	400	297	520	490	425	524	408	210	460	468	351	342	438	405	367	454	387	389	584	412	530	385	480	384	334	383	312	489	373	445	456	304	490	477	479	291	321	433
274	308	388	485	416	280	420	576	539	651	499	224	424	436	464	484	432	419	417	394	539	534	359	296	516	461	332	353	405	332	487	359	594	588	531	308	290	403	416	465	417	473	442	251	429	635	505	392	378	438
275	343	376	520	242	305	389	535	460	450	358	220	487	401	522	482	515	614	358	302	382	480	359	289	464	385	289	370	435	340	681	507	458	529	484	542	222	298	333	529	446	544	403	373	453	519	463	328	391	393
276	288	373	362	354	378	366	601	534	527	405	262	491	287	447	441	387	421	434	406	496	468	330	333	410	347	208	426	470	426	535	433	593	614	640	456	364	285	278	584	287	453	449	404	410	536	399	380	268	369
277	289	329	381	452	358	415	589	650	578	361	204	406	385	494	449	367	510	473	257	380	505	329	387	496	323	304	442	423	293	577	519	455	556	649	430	301	368	287	576	545	424	409	323	415	466	411	361	319	483
278	345	302	456	315	253	420	526	700	546	465	260	475	396	492	547	381	377	500	241	468	544	357	237	481	343	262	451	483	337	667	382	470	567	592	474	276	269	364	503	484	424	429	357	352	514	449	261	324	347
279	348	370	524	378	255	410	582	587	574	465	264	396	403	316	510	485	437	395	299	490	478	374	369	388	418	216	510	392	407	603	566	516	578	574	441	352	309	259	495	506	435	398	339	323	501	412	287	279	579
280	333	460	464	403	381	363	528	633	513	343	283	384	334	453	448	426	555	387	307	481	542	387	312	470	362	387	399	422	409	634	474	501	621	558	471	353	371	279	466	394	445	522	386	317	538	348	366	366	523
281	333	352	545	323	450	434	531	522	558	388	314	567	335	554	533	480	472	489	330	327	438	345	257	594	456	200	437	454	387	603	520	524	564	590	420	346	371	257	426	400	443	523	266	377	612	451	363	291	416
282	193	332	504	307	457	293	578	485	599	434	295	399	332	427	399	417	527	431	270	469	448	300	335	375	339	238	431	450	458	784	433	683	457	591	476	277	475	208	537	419	421	321	390	475	537	384	389	364	536
283	358	411	482	354	323	481	509	628	443	392	305	382	371	462	385	393	590	398	367	427	405	295	306	474	399	290	452	407	347	561	530	566	615	581	370	328	390	240	496	374	485	400	288	444	388	427	319	268	431
284	306	231	473	325	368	466	550	565	517	391	144	506	313	406	512	378	497	393	235	439	470	301	215	534	338	240	443	412	334	555	415	641	505	579	455	417	370	242	576	445	370	390	304	290	592	439	483	378	459
285	329	263	521	323	444	448	518	412	535	373	321	495	359	545	499	406	504	363	302	503	528	267	231	423	549	328	474	346	370	521	383	495	562	577	377	308	369	124	466	476	386	348	280	277	600	447	353	290	368
286	336	387	541	387	393	336	494	581	571	345	350	344	400	374	229	506	479	387	345	404	622	299	263	392	419	228	399	423	455	563	548	520	589	568	450	253	278	272	568	384	493	449	286	433	636	521	293	343	415
287	297	319	501	400	445	352	421	569	473	367	259	380	297	510	474	409	567	399	447	535	462	368	290	304	369	301	473	398	447	647	453	596	557	586	500	317	299	294	516	381	517	309	315	374	618	436	353	329	490
288	305	335	438	273	380	411	590	582	544	394	297	359	313	469	544	465	517	321	296	394	522	391	366	474	352	243	356	487	367	643	571	600	494	625	426	240	367	304	561	445	441	383	225	368	621	561	373	444	347
289	314	287	443	295	445	419	561	507	600	399	241	495	352	558	401	568	543	364	263	452	448	368	236	316	297	307	528	379	298	553	525	661	470	556	498	197	370	352	410	451	404	449	276	365	579	434	276	345	399
290	299	302	497	339	437	340	643	520	581	390	341	368	326	375	421	512	509	324	285	442	465	277	370	270	387	268	539	531	330	531	475	557	638	579	419	261	342	320	548	450	519	416	401	428	558	445	289	337	526
291	232	297	480	330	431	419	485	486	449	410	278	316	339	501	469	490	490	486	369	315	526	308	371	431	459	290	484	497	351	677	438	509	554	543	362	277	342	353	469	363	436	325	382	335	521	467	356	333	376
292	352	362	466	343	335	401	521	539	603	358	306	409	347	547	448	391	564	450	318	345	447	378	263	426	376	255	475	473	343	545	525	607	626	617	497	280	364	260	492	387	429	434	267	362	633	458	243	406	430
293	340	319	469	447	430	448	509	578	541	387	303	363	366	436	412	487	568	526	390	433	504	309	301	380	452	365	385	433	289	472	500	590	538	563	389	255	326	184	461	456	495	454	379	256	539	468	332	337	348
294	374	245	388	278	391	371	494	560	486	498	276	419	447	408	456	492	556	437	302	432	515	390	329	461	374	296	405	423	462	567	519	675	488	580	414	238	364	323	538	495	532	369	305	449	696	544	319	317	468
295	332	339	455	248	315	327	531	506	557	454	150	423	349	389	471	533	483	297	354	491	522	265	291	307	346	236	354	436	458	684	508	544	485	567	481	265	416	339	575	477	462	418	370	400	627	454	373	403	370
296	322	253	532	329	290	292	505	500	569	359	235	477	301	475	417	471	381	343	372	460	510	311	387	454	454	264	509	393	304	533	513	482	511	563	442	321	407	248	456	376	411	345	235	346	565	432	347	517	418
297	284	273	378	334	429	442	439	489	604	311	344	438	341	390	423	528	578	387	286	576	438	254	361	518	307	367	465	371	283	614	593	535	536	646	383	310	427	230	652	415	404	409	317	540	479	505	227	385	353
298	271	312	460	353	453	356	539	583	460	476	314	388	316	422	447	506	518	490	258	494	422	314	269	443	410	253	403	438	394	505	497	449	556	605	390	203	334	253	491	524	515	445	294	421	611	470	297	346	465
299	354	407	479	366	263	374	530	635	551	359	275	428	367	490	446	468	617	406	275	391	447	372	395	408	512	198	362	388	342	564	456	597	640	506	349	277	326	148	620	418	505	379	364	418	581	482	267	281	431
300	281	288	486	293	362	408	537	642	586	397	302	434	313	436	403	561	403	453	260	489	500	294	396	424	530	260	489	377	306	486	580	648	488	644	460	284	414	237	597	493	396	412	366	401	515	524	403	376	485
301	263	308	536	362	314	414	448	528	443	440	199	313	364	487	371	421	501	554	330	564	441	382	294	536	346	224	443	381	370	577	492	470	568	511	352	309	276	256	554	463	570	516	337	457	452	489	310	435	406
302
303
304
305
306
307
308
309
310
311
312
313
314
315
316
317
318
319
320
321
322
323
324
325
326
327
328
329
330
331
332
333
334
335
336
337
338
339
340
341
342
343
344
345
346
347
348
349
350
351
352
353
354
355
356
357
358
359
360
361
362
363
364
365
366
367
368
369
370
371
372
373
374
375
376
377
378
379
380
381
382
383
384
385
386
387
388
389
390
391
392
393
394
395
396
397
398
399
400
401
402
403
404
405
406
407
408
409
410
411
412
413
414
415
416
417
418
419
420
421
422
423
424
425
426
427
428
429
430
431
432
433
434
435
436
437
438
439
440
441
442
443
444
445
446
447
448
449
450
451
452
453
454
455
456
457
458
459
460
461
462
463
464
465
466
467
468
469
470
471
472
473
474
475
476
477
478
479
480
481
482
483
484
485
486
487
488
489
490
491
492
493
494
495
496
497
498
499
500
501
[truncated: 141 more columns]

## Sheet: AIAChr,AWAGC WT,UNC7UNC9,UNC18
Figures 2I, 2J, 2S-1H, 2S-1I
AWA::GCaMP2.2b F(A.U.)
Stimulus:	AIA::Chrimson
Genotype:	WT
[truncated: 503 more rows]
[truncated: 184 more columns]
