# Supplementary material for: Reliability of an interneuron response depends on an integrated sensory state
Source: eLife. 2019 Nov 13;8:e50566. doi: 10.7554/eLife.50566 (PMC6894930; doi:10.7554/eLife.50566)
Supplement: Figure 3—source data 1. [file elife-50566-fig3-data1.xlsx]

## Sheet: WT,unc13,unc18 to dia
Figures 3A, 3G, 3S-1A, 5S-4K, 4S-2K
AIA::GCaMP5A F(A.U.)
Stimulus:	11.5 nM diacetyl
Genotype:	WT
N:	1	2	3	4	5	6	7	8	9	10	11	12	13	14	15	16	17	18	19	20	21	22	23	24	25	26	27	28	29	30	31	32	33	34	35	36	37	38	39	40	41	42	43	44	45	46	47	48	49
Frame (Pulse at 100)
1	606	647	916	721	104	580	578	590	337	987	1012	1057	891	737	402	465	362	923	1004	436	1277	957	1062	633	712	1527	1179	1306	1066	841	1635	740	1004	679	766	957	757	237	678	593	495	106	1083	762	1066	1140	617	332	536
2	533	890	1026	766	200	625	705	504	265	988	748	1151	1041	600	320	491	387	1054	1078	495	1268	1210	1030	509	798	1218	1118	1433	1118	964	1439	787	1054	684	725	962	811	156	667	474	499	166	945	808	965	1109	654	427	512
3	525	808	660	773	292	732	593	537	42	975	1014	1028	981	670	399	450	452	983	1011	438	1219	1294	1194	476	591	1268	1142	1269	1131	1051	1577	738	1164	613	909	919	755	253	674	662	567	213	1127	755	1012	1070	719	460	547
4	530	769	635	614	311	785	478	603	125	1099	853	1145	981	636	414	528	272	1016	980	581	1136	1144	1122	741	652	1207	1056	1390	1306	867	1402	657	1036	685	790	825	772	136	512	743	371	176	1085	968	897	1153	648	443	495
5	575	781	949	693	18	697	645	662	-10	869	957	1235	793	673	451	492	551	1010	1077	541	1221	1080	1136	515	702	1477	1172	1651	1185	848	1496	688	1139	624	750	1262	868	351	642	594	756	217	1088	985	1076	1200	710	388	424
6	640	820	942	664	241	846	509	638	118	1118	883	1196	1255	767	384	522	468	936	950	407	1226	1098	1078	467	677	1390	1064	1555	1100	855	1534	786	882	766	780	923	694	394	688	572	781	28	914	682	1062	1105	682	386	447
7	581	883	1028	458	304	730	610	567	-34	945	924	1139	1038	733	485	289	435	1042	1016	411	1340	1184	1196	506	671	1250	1147	1572	954	1024	1481	672	935	694	805	930	694	118	597	483	651	194	1059	882	959	1273	676	347	531
8	436	945	856	749	306	542	505	451	235	1100	1017	1035	972	662	435	524	434	1052	1034	513	1242	1075	1134	508	731	1327	1166	1247	1294	1042	1576	774	1018	605	648	945	930	203	620	575	449	4	1205	786	1050	1036	751	412	566
9	576	941	832	754	308	641	607	407	57	1128	655	1174	920	748	386	609	373	1057	1058	421	1191	1174	1250	633	488	1304	1265	1235	950	919	1283	741	1051	707	875	893	710	199	699	582	519	262	1059	609	1083	1145	681	284	330
10	406	894	740	669	427	661	452	546	103	759	816	1091	999	622	384	381	412	1057	1053	443	1276	1080	1143	296	612	1442	1213	1307	1425	931	1376	728	1022	712	720	1119	769	257	624	568	824	158	1017	890	1085	1170	720	333	456
11	476	857	849	775	222	685	552	536	-42	810	901	1201	951	726	236	438	394	1042	1110	478	1314	1048	1167	518	685	1378	1083	1276	1313	823	1590	844	1038	669	762	840	691	178	646	430	600	79	1005	686	982	1200	677	382	426
12	469	898	758	664	190	689	610	407	253	924	793	1043	914	711	159	588	343	1078	1227	512	1300	1245	1174	420	644	1395	1119	1638	908	1019	1342	627	1008	627	801	861	824	210	670	524	608	84	1128	794	965	1141	750	283	430
13	496	877	732	715	182	677	518	518	139	1025	755	969	1153	708	264	366	419	1077	1087	464	1216	1082	1025	690	614	1420	1123	1578	1395	848	1542	624	891	540	853	1096	697	116	701	392	528	73	881	831	973	1072	545	251	673
14	512	947	957	757	261	650	628	445	268	992	854	1078	890	679	274	520	432	980	930	392	1240	1018	1160	740	682	1328	1168	1245	1193	948	1442	785	1211	810	712	846	698	264	603	608	759	205	980	736	1044	1185	726	417	364
15	534	745	907	864	145	814	544	501	196	790	808	1035	1012	577	329	476	507	1074	1034	521	1238	1263	1215	442	642	1557	1282	1364	1272	864	1291	797	1123	615	842	1018	718	230	598	488	580	113	1056	879	1026	1174	748	318	285
16	450	856	794	840	278	815	761	580	129	947	877	985	1077	684	431	453	479	892	997	469	1194	1227	1165	314	652	1414	1110	1283	1027	889	1321	666	979	748	815	949	756	217	642	595	639	194	1006	760	991	1124	729	308	541
17	477	805	936	719	224	619	570	513	287	978	789	944	1106	699	268	452	338	951	1059	352	1448	1093	1045	648	675	1458	1369	1215	1365	952	1454	740	986	535	800	777	733	275	666	538	562	173	1075	797	1005	984	711	351	482
18	518	964	844	741	261	707	712	539	190	998	755	1156	1205	676	313	447	384	1089	984	389	1304	950	1087	449	726	1370	1069	1218	1232	1023	1427	809	1149	735	602	800	782	188	721	549	547	135	1264	780	884	981	805	482	535
19	673	1003	792	651	138	735	474	713	84	731	622	852	1036	734	329	310	402	1071	1226	382	1167	1084	1155	528	559	1127	1199	1095	1230	815	1384	621	1020	706	822	932	621	223	660	540	486	144	1243	906	1016	994	810	425	472
20	461	901	746	692	234	687	560	654	128	970	838	931	1178	651	254	398	405	1067	952	331	1205	1248	1228	698	612	1326	1239	1492	1208	1013	1446	823	957	680	761	1059	729	253	737	512	656	80	1074	755	905	1194	493	347	390
21	460	790	762	761	242	681	655	603	126	1117	848	1003	916	815	370	460	583	1084	1008	342	1225	1051	1048	377	724	1443	1176	1389	1156	836	1488	619	868	646	775	1109	730	182	659	380	509	213	955	790	1016	1200	718	493	448
22	589	716	786	767	346	760	585	535	25	1003	705	935	963	715	391	374	469	866	1201	430	1201	1042	1042	225	741	1396	1295	1659	1182	911	1443	733	783	660	679	966	641	314	638	625	655	84	1056	867	1079	1317	575	530	366
23	582	816	903	833	239	763	542	684	9	859	834	1021	935	733	222	538	427	1065	1068	582	1300	1164	1091	461	803	1550	1182	1257	1044	925	1490	776	908	650	750	949	749	220	680	607	843	259	1160	746	1260	1026	643	295	459
24	494	892	955	673	291	493	643	638	148	1111	811	1001	997	514	370	529	553	959	1169	459	1223	1052	1058	483	631	1436	1208	1429	1142	796	1397	737	1012	571	744	1056	751	162	575	582	661	25	1073	959	1165	1186	713	404	480
25	587	868	854	587	244	744	682	662	123	1034	864	945	1009	575	400	427	361	1052	906	521	1190	1116	1123	411	720	1345	1170	1304	1141	1027	1469	747	1124	618	802	907	729	183	550	475	335	208	1097	723	958	977	763	299	509
26	587	722	743	732	189	680	693	614	230	978	901	954	973	740	408	439	467	918	902	382	1284	1096	1244	510	628	1266	1287	1552	1000	829	1373	733	1016	682	725	936	652	262	579	574	522	167	928	775	1160	1157	610	416	664
27	597	828	724	813	181	642	631	643	205	1125	621	955	914	720	441	466	511	915	938	559	1193	1215	1093	377	603	1408	1301	1287	1388	915	1454	877	808	629	687	654	810	262	642	526	816	146	1000	710	1096	1128	632	360	425
28	596	853	972	862	244	647	629	473	247	1004	1056	916	1326	689	496	423	487	897	1100	373	1339	964	1121	466	619	1452	1452	1385	1013	965	1288	709	1075	680	848	820	719	206	616	570	784	219	950	743	942	1201	703	474	557
29	453	808	1106	803	143	607	572	556	41	917	976	967	1101	715	417	538	338	1128	1091	474	1230	1075	1091	689	750	1362	1301	1327	1291	756	1295	817	892	539	887	843	753	44	626	463	588	284	1009	778	1104	1160	559	365	282
30	697	862	921	634	232	668	579	644	105	1013	736	980	733	787	498	300	339	1128	997	497	1221	1222	1118	602	524	1318	1298	1375	997	1025	1325	797	978	664	742	629	544	145	549	482	596	153	1103	658	978	1193	543	325	434
31	677	859	984	698	359	616	541	604	48	1051	803	926	919	737	303	451	564	893	1085	410	1173	1101	1119	452	622	1563	1215	1268	991	982	1470	697	971	757	695	835	777	360	606	586	637	134	1077	877	1119	1189	831	395	375
32	679	788	957	642	184	701	536	512	135	928	913	1122	1031	675	351	428	454	1094	1030	510	1363	1089	1029	519	633	1307	1139	1315	1118	1015	1445	626	1209	676	822	905	709	162	654	591	664	184	1039	822	880	1072	636	256	391
33	572	866	893	920	243	778	667	499	31	925	974	1009	1071	724	448	385	479	1072	1169	413	1281	1166	1065	434	659	1402	1241	1405	1167	815	1402	666	1180	602	869	890	733	254	542	560	790	88	1029	863	1015	1223	657	349	502
34	580	694	923	759	125	693	593	620	191	867	823	816	916	676	286	424	476	1038	1329	458	1393	1178	972	565	615	1392	1207	1529	1258	960	1416	639	938	703	730	838	716	82	684	586	720	59	964	786	886	1174	755	341	347
35	721	844	717	748	141	675	727	602	154	787	1084	839	989	692	196	407	343	873	1129	365	1235	1151	1190	411	709	1528	1052	1184	1326	854	1558	697	1036	626	792	847	765	139	677	451	887	251	1153	800	1138	1019	515	463	353
36	606	746	921	715	394	731	669	635	177	958	918	962	1070	683	443	482	414	1111	1044	537	1303	996	1100	495	704	1386	1213	1180	1391	896	1344	759	900	556	789	867	864	186	565	687	652	14	903	844	1144	1128	736	158	403
37	486	627	833	562	424	568	626	631	155	943	886	998	915	604	331	509	483	997	1091	418	1069	1050	1134	570	742	1422	1196	1202	1226	927	1461	544	1009	700	882	882	772	148	630	518	616	24	1059	766	926	1016	672	425	598
38	627	798	836	761	199	758	625	580	207	930	635	853	972	657	296	415	506	973	1100	457	1102	1063	1090	385	595	1524	1254	1350	1227	949	1479	694	1025	643	814	740	553	333	669	492	675	172	1187	812	976	1174	738	376	521
39	544	776	791	782	338	684	556	594	140	909	1065	878	933	638	392	415	403	836	1031	494	1368	939	1148	398	771	1453	1069	1364	956	854	1342	779	1080	563	801	964	712	316	633	443	707	-19	1041	845	1121	1188	871	383	409
40	482	810	924	749	154	699	548	565	91	876	894	911	1091	812	358	377	431	792	1107	507	1158	1211	1089	483	755	1207	1137	1350	998	925	1413	657	1052	648	688	945	845	105	744	547	583	90	1044	944	1017	1095	786	455	507
41	590	787	803	823	197	476	583	646	94	917	967	1076	874	716	393	535	404	950	1142	483	1367	1081	1279	278	598	1418	1224	1221	1341	1023	1582	788	1043	763	903	967	779	269	645	445	729	178	1178	797	1086	1117	627	375	553
42	603	808	534	776	271	675	535	659	87	928	1109	1005	995	773	431	267	455	992	1092	518	1218	998	1118	459	615	1335	1216	1330	1047	860	1506	719	1056	606	807	670	845	219	621	549	757	95	990	813	1003	1044	723	455	467
43	509	710	806	620	306	734	555	625	190	973	708	1062	1123	657	380	464	460	961	1008	478	1304	1043	1106	383	684	1458	1112	1313	1178	1024	1407	585	1000	562	826	1009	775	265	541	503	662	239	1077	742	919	1189	714	325	558
44	540	679	930	669	221	837	581	528	210	993	931	978	1078	680	415	432	413	995	1161	550	1212	1234	1109	405	669	1348	1383	1587	959	950	1489	854	1151	680	879	780	935	243	594	556	621	86	1019	899	1155	973	834	387	233
45	586	784	709	702	93	547	568	580	231	995	1071	896	1101	717	209	509	458	909	1068	342	1229	1158	1164	619	679	1262	1328	1241	1113	921	1549	710	1083	861	923	823	852	174	503	550	855	38	920	671	1091	1115	674	404	620
46	705	764	706	734	164	757	692	591	123	929	599	942	1130	687	199	333	483	922	1193	480	1311	1090	1090	299	670	1146	1239	1684	1142	925	1416	735	957	623	747	960	848	267	726	603	528	47	1134	807	890	1074	881	460	524
47	647	755	917	616	185	681	462	560	153	1070	939	1017	927	672	366	517	472	1008	978	488	1325	1136	1141	359	596	1296	1284	1398	1070	851	1563	830	1203	599	735	919	868	381	513	666	508	123	1004	877	1019	1183	607	330	430
48	580	893	1027	714	114	717	485	548	109	861	978	1016	973	633	331	315	478	1052	1037	416	1291	1248	1051	645	734	1407	1166	1250	1022	895	1602	753	981	632	813	942	929	271	510	512	488	142	1200	808	1073	1231	711	369	622
49	702	808	861	827	273	626	660	611	-13	1002	1057	1063	935	700	451	379	428	1112	1063	478	1197	1125	1035	338	603	1534	1226	1182	1557	1025	1561	867	1067	665	651	982	837	238	718	647	526	83	926	834	1031	1343	631	515	439
50	482	919	1023	787	270	762	585	585	112	1070	943	1120	934	759	539	522	397	1023	1013	441	1191	1139	1049	512	642	1436	1253	1331	1276	861	1589	627	1193	552	961	1066	813	152	622	462	610	24	967	768	1023	1260	699	303	422
51	547	829	987	720	299	666	538	507	167	963	1064	860	1392	613	266	392	372	1153	1035	409	1355	1158	1051	393	702	1659	1338	1347	1158	924	1577	881	1045	642	711	915	941	223	682	585	738	103	1169	722	1093	1155	660	195	704
52	577	753	945	614	181	777	554	597	71	924	1027	794	988	743	356	408	525	1038	1202	520	1192	1136	1018	545	726	1293	1195	1314	1003	1022	1719	855	1101	667	914	1055	899	324	577	509	542	132	995	823	994	1068	671	305	367
53	571	849	1046	703	182	728	620	586	118	991	780	955	985	696	366	401	558	988	1142	335	1301	1092	1127	225	641	1454	1079	1466	994	795	1654	720	975	702	840	1065	809	301	666	525	646	76	1062	835	1041	1171	670	228	628
54	572	845	894	771	221	726	690	586	117	908	780	847	1158	736	399	416	285	1044	1055	428	1137	1168	1218	425	714	1325	1204	1721	1025	1032	1626	882	1004	518	822	1273	891	344	589	551	627	-20	971	856	1041	1100	631	268	454
55	523	692	590	587	171	595	689	444	167	900	1052	881	867	680	419	444	353	884	842	394	1272	1028	1171	342	780	1464	1295	1322	1250	893	1536	675	1043	587	707	1108	980	231	697	433	799	195	949	623	918	1170	528	278	425
56	614	793	766	683	173	763	595	532	216	939	960	1010	957	662	470	341	385	1169	884	469	1268	1108	1176	318	723	1363	1219	1297	1043	950	1424	750	1085	748	808	1114	834	185	674	587	561	137	1009	746	1077	1111	589	316	523
57	510	808	913	821	303	633	620	663	101	1031	1002	889	993	697	411	400	494	1047	1193	441	1209	1251	1221	523	663	1295	1334	1281	1284	981	1594	737	1045	562	797	982	791	314	716	486	579	215	1149	842	991	1135	689	398	274
58	500	984	764	675	261	728	458	457	-21	938	922	935	1029	630	455	339	451	971	1237	453	1154	1042	1063	232	641	1360	1265	1270	1176	910	1633	872	1015	631	760	1191	902	167	621	584	757	111	987	843	971	1226	838	445	233
59	630	758	925	664	370	644	697	552	151	1032	559	889	1010	674	390	441	333	862	1150	557	1247	1087	1141	435	744	1445	1312	1374	1440	976	1654	559	873	642	921	1116	769	176	614	455	611	182	1088	794	964	1181	690	474	341
60	492	591	693	840	142	656	722	545	43	1010	759	872	958	643	465	385	483	910	1071	384	1366	987	1128	362	610	1507	1179	1319	1113	924	1626	913	1088	750	794	1113	787	377	572	668	506	-86	1105	915	1016	1182	696	399	311
61	655	825	1129	744	205	755	618	520	100	841	745	1013	1020	764	315	414	405	981	1005	452	1098	1074	1095	397	730	1466	1333	1479	1105	977	1587	907	919	637	881	1266	949	193	602	413	535	244	1139	760	900	1164	691	334	543
62	596	897	1049	725	125	728	599	470	168	947	646	940	1072	711	387	394	395	1065	1132	303	1111	1132	1133	408	768	1544	1325	1625	1129	993	1621	710	1105	636	763	1198	903	206	707	615	686	215	1015	942	1006	1195	623	329	472
63	566	795	1145	648	194	734	661	636	126	899	733	925	999	684	398	391	410	986	997	683	1222	1102	1105	355	645	1460	1219	1264	1028	947	1683	767	895	702	775	1103	802	304	611	715	786	129	1172	806	954	1016	674	367	251
64	616	918	1160	669	210	690	891	670	79	843	520	967	1001	723	478	420	400	909	1098	316	1184	1125	1120	227	751	1539	1113	1241	1157	1036	1758	751	1018	743	809	1101	903	352	635	550	601	47	1069	861	770	1102	585	411	423
65	652	1000	1297	786	174	653	554	544	43	986	646	957	886	604	270	429	475	855	1065	601	1270	1154	1137	414	691	1340	1266	1426	1442	1033	1682	649	1073	753	723	1178	944	162	601	521	851	142	960	821	1016	1134	676	373	541
66	664	833	991	722	331	750	760	582	165	889	833	819	1022	771	285	484	402	1091	1090	419	1307	1181	1181	330	688	1429	1278	1673	1437	1004	1753	658	942	578	713	1269	757	218	664	619	587	-8	1128	925	1087	1104	662	368	492
67	435	860	1096	700	223	726	784	705	62	1138	631	807	981	512	518	411	394	1015	1005	467	1284	1018	1138	446	738	1330	1223	1298	1138	889	1504	728	1003	498	773	1118	943	201	614	807	932	152	1012	935	1029	1236	657	422	391
68	571	814	1042	694	211	762	666	559	139	908	566	934	955	545	384	413	348	1082	980	556	1268	1099	1116	425	840	1278	1144	1336	1101	829	1669	797	1057	537	744	1104	893	163	682	589	656	34	983	949	950	1116	616	395	424
69	488	770	1184	695	122	715	700	570	197	977	488	888	1106	693	424	408	462	968	1128	424	1251	1023	1091	588	813	1447	1311	1688	1066	829	1537	683	1051	513	716	1079	862	298	626	542	587	197	1059	855	1095	1138	729	194	321
70	579	734	989	693	225	665	648	552	57	992	846	899	1028	616	270	464	413	1016	1026	551	1266	1166	1107	277	736	1334	1192	1383	1126	1066	1723	854	957	722	848	1429	992	118	649	540	567	1	1000	869	987	1059	648	472	443
71	517	736	988	672	220	550	689	485	163	1094	679	916	930	695	402	492	387	1105	1145	514	1087	1060	1048	463	907	1557	1344	1229	1276	1046	1670	725	1003	679	724	1299	842	345	580	401	631	147	922	704	972	1279	524	362	529
72	612	759	987	642	158	669	655	518	36	863	766	999	1020	661	467	656	429	1008	974	434	1329	1255	987	197	809	1529	1073	1131	1479	981	1580	929	992	606	632	1368	817	179	614	440	765	216	932	932	865	1218	685	338	559
73	620	715	1087	732	300	579	716	616	154	925	819	998	1017	760	435	422	340	968	1175	386	1231	1131	990	449	839	1379	1341	1401	1321	929	1466	674	1011	716	867	1374	1060	207	448	589	675	203	934	904	1045	1083	619	337	458
74	547	831	1254	720	0	597	748	619	43	828	882	848	1015	616	451	359	501	1002	879	354	1198	1018	1150	405	755	1496	1281	1335	1022	1025	1659	875	1055	586	721	1365	1071	172	606	633	671	66	1049	775	1029	1117	698	339	344
75	618	704	1115	890	265	683	578	571	96	974	890	1007	995	699	386	479	340	967	1047	330	1158	1270	1174	599	778	1144	1103	1570	999	1101	1512	726	908	718	935	1300	916	175	636	739	513	223	1145	741	1007	872	653	319	407
76	473	820	966	613	314	630	730	509	101	855	680	924	850	701	288	410	353	1021	1027	388	1159	1095	1162	342	860	1350	1376	1159	957	985	1568	801	987	557	903	1432	929	206	585	600	653	208	1100	787	957	1102	770	342	516
77	567	849	1096	746	373	779	785	539	124	873	794	976	940	650	450	451	339	1023	1048	387	1336	1052	1050	321	668	1494	1166	1311	1085	934	1432	742	1037	599	886	1308	1064	363	681	469	719	-116	1114	692	1039	1010	714	349	281
78	587	891	1030	794	322	658	800	527	183	959	916	865	928	693	398	386	454	954	1021	337	1214	1178	1171	356	809	1317	1220	1396	1486	963	1482	724	956	803	659	1286	861	288	648	500	655	178	1032	693	1011	1205	639	360	517
79	735	802	1211	695	163	717	715	528	275	1065	820	1134	1021	728	405	387	352	921	1067	441	1363	1022	1130	255	912	1457	1041	1376	1243	970	1624	738	1043	613	826	1335	883	134	600	268	746	319	1014	749	923	1155	607	323	536
80	566	831	1030	574	268	702	617	536	135	1011	785	927	1049	738	379	379	515	1049	1250	539	1184	1144	1094	379	854	1388	1372	1469	1079	1045	1459	738	925	668	888	1144	1106	211	700	556	662	157	981	861	1079	1091	676	264	396
81	380	778	1079	774	122	608	469	623	65	958	819	1009	949	634	392	395	461	893	1100	446	1314	1136	1166	368	861	1530	1225	1278	1369	1004	1558	635	1056	717	688	1417	877	326	566	638	638	241	864	697	978	1125	712	342	280
82	578	829	930	785	264	770	651	585	192	1018	840	1088	938	699	756	430	297	934	952	514	1177	1050	1170	592	725	1422	1275	1298	1057	941	1439	701	1068	656	766	1327	1000	336	704	589	698	157	1037	758	925	1122	653	413	455
83	458	871	924	741	387	680	790	573	179	1117	827	893	1057	736	447	357	347	1090	1134	546	1130	1103	1058	409	691	1492	1093	1347	1206	946	1398	824	1123	627	763	1275	882	291	708	512	676	67	1063	857	1077	1152	731	347	336
84	695	866	972	769	160	725	620	653	198	860	905	1024	1076	734	491	461	359	1046	1002	444	1197	1189	1271	325	609	1288	1325	1360	1398	944	1291	751	1054	702	934	1256	1006	319	736	359	575	319	967	899	725	1174	652	413	409
85	530	845	1059	590	232	619	731	684	141	924	926	1043	835	609	410	431	331	884	1186	407	1303	971	1229	423	743	1450	1188	1420	1320	982	1471	763	1051	671	682	1372	1010	326	652	535	657	-41	890	642	995	1151	784	193	512
86	568	927	995	697	216	764	654	504	108	952	845	827	1333	702	332	488	400	891	1107	597	1331	1079	1240	234	750	1342	1148	1340	1284	984	1259	770	960	834	737	1260	919	178	684	501	630	204	981	793	942	1231	661	267	619
87	729	708	1161	799	302	760	461	566	31	1032	811	867	1089	502	357	432	389	1067	1113	346	1118	1135	1174	415	815	1429	1201	1403	872	1021	1416	769	988	667	662	1358	1050	121	614	606	745	47	1197	511	995	1180	621	339	301
88	633	737	1040	812	329	672	731	540	118	991	907	1086	1029	621	191	514	316	1077	1041	495	1271	878	1099	275	706	1447	1245	1377	956	925	1580	987	937	641	799	1359	944	141	566	347	683	199	1116	888	874	1230	751	409	617
89	518	851	1005	679	266	649	692	573	34	1079	825	982	991	675	505	473	328	951	1181	347	1421	1214	1166	318	740	1392	1161	1449	975	965	1265	641	975	629	665	1325	1026	278	723	387	693	215	1042	712	1067	1106	607	364	300
90	466	805	762	643	291	640	541	598	233	1079	814	1006	906	619	465	500	385	944	1056	378	1052	1121	968	335	848	1361	1287	1336	1261	1009	1225	753	1004	624	803	1384	823	296	618	459	424	194	1073	769	1115	1111	610	348	598
91	641	672	1189	700	332	649	846	531	98	963	936	1022	965	667	292	453	344	854	1102	402	1176	1151	1145	519	790	1488	1133	1583	1165	977	1304	691	978	708	728	1305	938	294	565	448	608	92	900	849	885	1267	675	375	488
92	540	891	1205	663	219	647	750	579	174	945	765	969	1284	690	525	542	289	906	1107	526	1193	1050	1078	362	868	1245	1220	1354	1368	863	1332	811	1085	645	789	1459	949	275	680	740	586	121	1014	654	1043	1188	677	418	511
93	634	773	1219	690	153	728	624	628	147	922	757	982	955	675	361	444	427	1072	975	420	1195	1144	980	378	816	1457	1183	1453	1201	953	1562	751	920	661	673	1372	889	244	592	510	804	102	879	712	1070	1101	597	321	455
94	642	791	1220	713	343	593	561	580	94	988	921	843	982	721	291	410	419	1056	1066	581	1236	1102	934	240	754	1538	1110	1406	1039	924	1481	739	992	705	776	1419	972	229	687	589	498	64	994	714	1032	1190	776	552	455
95	656	774	1062	707	304	812	601	529	184	992	809	857	939	703	451	510	339	873	1113	388	1294	1095	1038	316	827	1203	1257	1377	1058	909	1476	712	952	678	766	1256	1024	314	591	608	590	193	885	637	818	1146	771	531	330
96	583	749	902	832	311	550	660	440	47	1032	1036	908	1037	679	268	297	559	1010	1177	423	1155	1115	1044	450	588	1497	1239	1308	952	1010	1574	668	1008	651	758	1420	964	156	605	542	658	123	907	1026	1051	1143	644	368	413
97	683	789	859	867	228	624	587	731	135	979	882	1048	941	742	382	479	409	906	1072	468	1273	1115	1136	330	785	1326	1204	1324	1137	889	1370	919	1046	565	819	1444	950	162	551	506	692	134	986	674	862	1090	637	165	583
98	601	1012	925	659	208	583	803	611	178	936	959	991	856	797	349	548	443	915	1089	439	1107	1158	1110	304	819	1660	1341	1330	927	1004	1523	827	952	580	802	1258	926	267	578	364	452	101	848	992	964	1039	580	275	545
99	648	818	969	842	124	600	719	568	251	928	768	1022	962	532	334	381	411	1178	1153	416	1268	1054	1063	525	860	1420	1029	1391	1319	989	1558	799	943	697	989	1395	874	286	687	586	665	31	944	896	1040	1363	724	302	453
100	650	856	959	760	359	544	620	552	97	1155	852	1003	1025	833	221	426	384	989	1125	266	1158	1114	1078	353	1005	1264	1148	1512	967	1063	1573	882	1021	658	875	1352	863	300	593	435	586	106	906	881	966	1265	684	357	571
101	766	883	1040	663	206	581	587	468	126	853	966	1049	1110	552	477	444	413	1059	1082	335	1195	1155	1114	269	975	1528	1099	1332	1234	979	1468	816	1090	772	916	1279	819	385	726	565	828	56	954	707	876	1229	729	412	384
102	576	759	882	727	261	658	568	664	12	1007	745	833	1071	790	263	517	422	1003	1188	276	1260	1085	1170	378	788	1429	1192	1384	1297	919	1385	773	1047	785	736	1490	904	196	687	556	826	74	946	791	908	1118	898	474	346
103	571	796	898	637	191	590	814	470	110	1169	972	1017	849	752	538	447	428	1057	1136	544	1213	1075	1063	302	884	1559	1358	1392	1172	852	1574	695	1035	657	964	1397	904	208	681	525	577	125	976	879	1093	1054	608	150	495
104	623	847	842	826	279	743	510	489	205	849	969	903	986	578	429	356	537	965	1177	443	1263	964	1175	494	941	1252	1272	1317	1201	986	1480	689	988	699	854	1209	1076	184	623	649	526	89	986	694	925	1114	575	426	452
105	641	750	923	732	180	629	502	620	101	938	806	1094	850	643	535	452	421	1067	1063	371	1278	1163	1018	419	864	1318	1161	1447	1475	1042	1550	817	1079	554	792	1296	935	243	591	585	601	222	1110	883	863	1286	554	229	443
106	443	859	809	662	162	648	662	629	174	1006	768	983	999	712	351	420	461	1071	1065	500	1247	1196	1077	182	754	1405	1314	1350	1167	1022	1548	648	938	445	559	1285	961	200	471	565	596	118	959	791	1032	1100	708	473	462
107	625	858	929	626	173	640	539	565	73	949	982	1024	997	764	528	375	336	977	1060	509	1278	1159	1089	261	1018	1520	1122	1406	1226	1068	1551	761	990	700	826	1283	850	312	710	590	625	147	904	841	805	1001	740	332	262
108	632	838	954	806	224	711	631	404	286	999	1081	944	1016	639	392	509	488	877	1136	388	1245	1237	1095	322	808	1381	1307	1317	1222	1074	1447	753	1039	602	849	1307	894	202	698	567	526	71	974	639	798	1305	924	319	540
109	574	710	1032	781	328	655	466	555	201	939	876	856	942	678	397	483	471	866	1051	419	1289	930	1045	380	928	1444	1250	1365	1151	975	1594	850	998	638	753	1241	885	293	687	504	575	-64	1021	750	1024	1241	806	497	364
110	612	845	954	860	261	620	571	449	187	1013	847	1126	935	669	321	431	556	1012	1056	372	1281	1135	1234	294	951	1555	1349	1419	1335	918	1676	859	977	633	738	1214	888	302	676	443	653	162	933	714	803	1117	775	424	530
111	600	832	816	707	46	742	555	597	127	952	795	1047	998	753	259	351	409	958	1215	333	1204	1228	1134	401	939	1307	1240	1399	980	983	1603	691	1074	686	864	1319	993	311	562	512	688	141	1107	791	864	1225	553	344	421
112	627	872	1069	707	173	666	691	627	-35	1088	877	1002	779	741	382	434	734	950	1198	376	1312	1190	1147	244	936	1517	1130	1452	1130	936	1648	717	986	551	763	1374	897	211	591	561	435	200	951	716	814	988	608	467	440
113	706	658	820	766	393	582	599	751	141	1070	936	1002	1038	596	145	477	694	892	1171	395	1229	1030	1180	258	880	1307	1292	1399	1408	898	1736	665	981	596	803	1325	951	244	503	317	587	72	869	451	996	1252	688	519	355
114	427	824	873	722	338	593	589	561	197	984	987	1005	977	627	362	498	795	886	1081	465	1388	1190	1062	285	671	1368	1266	1488	1272	1080	1729	645	1140	752	648	1274	1015	165	604	635	496	12	879	778	872	1089	658	464	425
115	554	696	829	808	215	563	536	556	124	992	788	1112	944	592	261	459	713	980	1076	409	1180	1114	1142	304	812	1585	1290	1482	903	936	1618	813	1057	636	827	1193	860	170	690	584	741	106	921	673	885	1155	701	613	407
116	560	830	919	680	402	646	543	589	198	950	786	832	1012	720	386	504	647	994	1347	414	1350	1175	1045	431	949	1487	1123	1523	1479	1145	1685	724	1106	763	696	1135	1182	245	666	516	599	-26	951	695	1055	853	835	554	398
117	556	951	958	771	525	755	395	478	49	905	839	1092	1019	641	642	563	771	1122	1177	471	1204	1136	990	344	778	1386	1210	1426	957	981	1744	820	971	487	865	1064	907	139	473	481	543	212	990	947	854	648	724	684	401
118	737	837	969	689	615	626	557	594	150	932	847	1132	706	747	587	439	859	970	1003	498	1383	1090	1004	479	798	1294	1075	1494	1274	1116	2026	878	823	679	680	1072	926	287	666	612	527	117	887	856	814	1059	694	817	454
119	466	942	1042	754	645	806	560	528	44	950	925	881	1042	782	818	418	733	946	1082	449	1275	1137	1016	166	767	1491	1355	1459	1100	1099	2095	1182	933	672	807	1160	949	152	661	477	736	70	1020	706	1012	1125	715	707	479
120	539	827	884	739	904	1099	643	607	56	1044	843	979	1088	727	641	466	698	949	1102	478	1280	976	1108	272	695	1243	1232	1369	1101	928	2175	1420	1295	541	848	1063	1021	297	635	664	625	153	961	757	1043	1176	785	818	567
121	586	756	935	741	731	1396	600	520	175	1047	963	1228	977	806	724	520	736	1027	1114	433	1376	1131	1037	324	775	1509	1284	1332	1069	1017	2136	1408	1195	685	641	1106	875	122	600	448	613	181	1000	893	906	1149	751	706	308
122	502	767	972	744	850	1458	629	661	-44	1070	774	958	986	683	648	535	759	1034	1085	456	1270	1113	1163	431	762	1564	1222	1511	937	982	2258	1542	1104	654	777	1259	682	285	625	616	592	204	974	658	964	1058	654	905	289
123	587	846	861	834	933	1427	448	585	203	1052	896	1066	1082	673	736	441	877	894	1171	409	1290	1123	1126	354	690	1470	1251	1532	1183	1078	2054	1484	1125	588	770	1321	1053	581	636	568	817	28	1034	874	1075	1284	690	943	589
124	547	603	892	733	800	1302	669	450	153	1350	768	1109	954	633	762	523	1128	998	1129	523	1109	1177	1174	273	769	1438	1482	1906	1171	1111	2087	1520	1038	474	811	1208	908	680	670	536	701	52	1084	811	910	1015	751	948	559
125	732	898	1122	1111	833	1428	739	609	301	1603	841	1077	898	511	517	418	954	1036	1136	454	1282	1247	1171	398	846	1421	1676	1451	1027	1200	2121	1517	1209	610	833	1258	877	831	519	620	422	135	767	738	1136	960	615	963	477
126	848	920	1083	684	713	1319	621	508	156	1697	879	1120	889	697	708	612	1008	1068	1148	526	1273	1278	1120	465	874	1206	1647	1577	1288	1281	2093	1515	996	616	867	1342	1051	599	770	539	612	185	993	693	1012	1215	760	922	272
127	886	850	834	1170	902	1284	501	541	105	1994	594	1104	888	628	829	584	1020	1054	1020	454	1259	1164	997	225	824	1564	1491	1469	2029	1470	2137	1329	1007	696	852	1200	1175	625	643	685	742	-15	973	794	961	1187	719	960	503
128	768	833	899	1087	645	1203	462	624	68	1834	707	1165	1002	688	644	556	1006	1150	1093	409	1284	1119	1055	413	798	1712	1700	1504	2106	1373	1965	1525	1141	584	632	1501	1019	562	873	769	640	145	1122	833	1057	1127	644	888	521
129	928	957	1106	910	850	1261	526	664	253	2014	927	1295	961	752	691	482	1000	973	1151	537	1269	1268	1018	260	797	1526	1554	1398	1882	1422	2096	1506	1037	759	868	1668	1291	487	820	846	857	113	1027	808	1151	1098	658	802	591
130	932	856	914	1119	885	1359	617	733	396	2107	911	1352	1041	702	644	410	957	864	1008	475	1234	1166	1091	353	787	1271	1573	1365	1280	1475	2055	1508	1100	721	785	1743	1083	639	900	862	1064	140	956	719	943	1083	584	416	609
131	908	938	919	1155	920	1171	703	832	147	2123	824	1356	1164	776	659	466	979	1061	1070	496	1275	1165	897	422	724	1234	1799	1495	1254	1540	2045	1370	1131	737	737	1719	998	584	1215	817	1248	182	814	913	964	1166	938	833	635
132	936	967	911	1278	606	1211	495	874	223	2146	939	1361	1370	736	683	522	951	923	1129	497	1306	964	1194	328	873	1594	1688	1495	1823	1473	2118	1538	1024	625	928	1741	1051	710	1064	774	1662	268	972	666	993	1082	929	380	338
133	1002	1080	923	1089	629	962	662	1017	349	2156	890	1442	1490	657	983	576	1067	1208	1163	422	1319	1160	1103	355	754	1479	1609	1585	1374	1508	2056	1351	967	732	712	2211	1442	556	1142	720	1168	164	1259	872	940	1266	1260	319	663
134	751	943	881	1255	759	1135	643	1135	368	2113	890	1568	1480	629	862	684	844	1326	1076	607	1234	1041	1122	416	767	1724	1818	1445	1257	1568	1944	1261	1119	490	828	2110	940	662	1247	903	1124	282	1376	846	1040	1391	1256	274	654
135	807	1204	1038	995	683	963	837	1160	262	2323	1057	1538	1531	708	504	875	977	1661	1140	919	1266	1167	972	574	789	2179	1651	1482	1227	1404	1680	1287	967	670	788	1981	1088	653	1117	527	1087	240	1632	1060	1048	1280	1381	386	692
136	873	1001	889	1230	893	1002	881	1130	173	1898	969	1397	1538	562	440	807	1150	1776	1060	751	1259	1260	1103	412	749	2481	1629	1463	1196	1412	2067	1372	1186	611	810	1804	1200	473	953	605	1196	289	1593	1095	882	1136	1467	831	712
137	1001	1065	1113	1171	965	1052	927	1136	239	2183	988	1587	1602	672	630	817	994	1689	1030	525	1371	1188	1197	429	920	2358	1845	1484	1127	1574	1970	1654	961	657	617	1746	1025	590	1128	924	1078	214	1627	1315	951	1278	1404	407	763
138	1071	1043	1048	1158	690	1160	525	1076	249	2243	815	1541	1654	1074	937	894	990	1878	1122	964	1410	1064	1086	442	832	2453	1727	1422	1157	1577	1990	1426	1083	677	754	1825	1128	588	1094	986	1516	415	1541	999	1023	1343	1375	861	546
139	1235	993	1022	995	666	1199	1137	1059	285	2340	914	1556	1655	1355	870	939	922	1911	1257	582	1182	1109	1138	511	691	2344	1836	1521	1160	1486	1978	1454	1109	650	721	2120	1099	699	1001	1090	1223	355	1514	1126	999	1254	1386	766	800
140	1133	904	952	963	763	1150	1174	1004	98	1621	994	1754	1820	1421	457	984	928	1964	1013	604	1475	1091	1180	511	941	2372	1897	1369	1054	1540	1795	1627	1003	639	992	1981	979	775	1129	885	1199	374	1830	938	961	1266	1376	810	639
141	1099	983	1029	1408	865	1219	955	940	310	901	1115	1412	1701	1490	1015	750	873	2072	1135	610	1365	1273	997	249	732	2149	1839	1490	1150	1574	2135	1456	973	603	852	1822	1281	791	911	931	1215	274	1698	1065	1083	1231	1375	805	391
142	1108	973	1037	923	609	1145	1314	1099	250	484	1108	1558	1818	1645	830	896	832	1986	1157	565	1343	1159	1115	522	846	2576	1962	1381	1215	1455	2121	1335	1253	675	794	1775	1240	898	961	888	1163	252	1658	946	907	1410	1274	700	490
143	956	1096	908	1374	728	851	1223	1015	154	459	746	1544	1622	1588	1048	1019	1059	2021	1144	398	1393	1152	1283	622	814	2298	1850	1288	1187	1433	1994	1487	1207	649	794	1821	1344	811	960	889	1305	348	1714	1029	1209	1201	1256	479	765
144	1005	1252	1131	1175	780	781	1361	943	295	576	996	1753	1731	1542	897	719	910	2253	1202	609	1290	1179	985	653	862	1786	2005	1370	1127	1454	1917	1452	1050	609	852	1752	1314	813	970	997	1185	518	2007	1203	1002	1341	1345	777	682
145	1090	1193	1029	1243	835	1193	1002	1006	280	532	956	1874	1768	1606	403	999	1029	2223	1011	1098	1406	1090	1143	315	848	1862	1903	1592	1119	1486	1923	1412	1073	625	856	1505	1413	776	980	1015	1441	351	1575	1038	902	1351	1206	695	704
146	998	1144	1085	1034	811	1083	491	950	413	1161	1043	2007	1733	1524	420	771	834	2385	1031	496	1260	1171	921	504	864	2517	2362	1443	1134	1471	2084	1291	1041	545	904	1714	1399	778	918	930	1346	323	1887	1010	1088	1475	1286	822	656
147	900	1022	1068	1427	684	962	1042	796	158	1505	934	1772	1769	1559	804	1072	1038	2285	1029	664	1245	1060	982	449	817	2124	2132	1409	1046	1332	1943	1330	1202	758	900	1619	1206	725	1001	914	1432	433	1655	1055	1088	1458	1152	754	862
148	877	1069	1158	1417	736	1050	752	814	375	2089	831	1601	1772	1579	818	904	1008	2183	1151	543	1278	1349	1050	414	936	1884	2131	1439	1116	1668	2139	1301	1276	644	791	1843	1279	902	1091	997	1383	453	1798	1001	1022	1319	1253	377	368
149	1136	1261	896	1427	845	1009	947	915	287	2316	819	1821	1658	1456	635	932	1035	2094	997	725	1457	983	1166	453	1067	2144	2031	1422	1098	1410	1999	1321	1119	463	806	1600	1483	742	1340	1015	1333	432	1981	1031	1182	1509	1400	687	674
150	893	1220	1075	1195	665	1215	1266	873	241	2307	1113	1903	1628	1559	831	960	1023	2064	1096	708	1317	1213	1086	462	857	1992	1917	1438	1115	1381	1839	1454	1041	540	713	1511	1263	840	1422	635	1211	447	2154	675	990	1557	1428	718	475
151	966	1233	1159	1264	803	1019	1250	737	344	2336	846	1922	1625	1389	963	1109	932	2122	1082	564	1276	1125	994	337	989	1820	2198	1346	1738	1549	1807	1329	1067	746	547	1623	974	877	1356	999	1729	305	2033	811	1102	1537	1395	645	836
152	1076	1190	900	1109	678	1069	1238	876	507	2037	986	1671	1580	1492	848	1058	979	2063	1040	572	1178	1128	1124	410	884	1724	1921	1327	1720	1348	1782	1369	1187	599	890	1600	1465	912	1295	601	1495	369	2005	963	1211	1444	1257	620	760
153	1188	1260	1083	1086	810	1047	1123	957	248	2239	901	1727	1625	1451	863	1147	940	1978	1301	468	1291	1199	959	472	1068	1990	1886	1326	1727	1339	1792	1547	1051	557	684	1612	1301	861	1083	846	1207	510	2141	1031	1097	1829	1098	818	704
154	1275	1228	1073	1236	765	1003	859	882	251	2247	704	1704	1582	1508	824	1041	992	2020	1091	702	1231	1269	1123	421	1005	1948	2186	1478	1661	1392	1738	1570	1093	696	781	1484	948	834	1254	1013	1095	348	1799	1033	1262	1576	1373	612	913
155	1191	1004	1001	1332	754	1030	1244	735	208	2228	1019	1773	1556	1407	821	980	905	2016	1124	675	1325	1303	1007	238	811	2033	2207	1489	1402	1398	1567	1550	1120	589	850	1365	1189	706	1304	833	1422	382	1978	966	1051	1661	1262	626	829
156	1047	1258	890	1454	769	1050	1060	815	203	2411	907	1671	1699	1622	384	969	964	2076	1038	701	1420	1089	1179	491	1097	1682	1980	1332	1660	1423	1655	1531	1141	613	952	1244	1022	885	1118	610	1144	330	1869	1038	956	1535	1161	600	843
157	1073	1387	954	1069	810	1036	948	780	352	2289	1043	1655	1569	1513	832	833	951	2169	1139	622	1356	1292	1056	566	856	1613	2074	1308	1764	1309	1602	1446	1078	600	728	1407	1056	636	1223	914	1143	308	1801	994	1003	1563	1320	640	950
158	1057	1254	1211	1386	677	1140	1094	761	394	2327	996	1792	1617	1472	727	948	702	2118	1071	686	1299	1153	1174	557	864	2010	1972	1476	1618	1417	1764	1379	998	636	891	1319	1214	801	1388	967	1418	166	1870	983	1000	1494	1280	575	810
159	1055	1210	976	1453	731	1277	781	905	181	2332	874	1698	1430	1468	809	914	820	1889	1215	613	1502	1086	1035	565	986	2097	1970	1401	1675	1388	1435	1562	1106	526	982	1430	1034	689	1133	710	1210	461	1755	972	1065	1555	1288	209	865
160	1097	1197	1111	1340	670	1167	1000	710	406	2402	1069	1775	1505	1567	1024	874	814	1981	1051	499	1347	1111	973	555	924	1700	2049	1499	1544	1610	1662	1564	987	589	627	1319	1088	679	1244	555	1308	382	1856	1065	1001	1557	1202	499	878
161	1134	1305	875	1036	782	1446	935	730	208	2491	1017	1818	1669	1438	466	801	788	1981	1000	610	1361	1160	1107	429	905	1910	2031	1418	1190	1250	1508	1413	1103	715	755	1317	1301	800	1166	349	1405	492	1813	988	1011	1412	1112	652	889
162	1203	1257	1133	1295	877	1456	995	590	217	2086	1028	1723	1575	1507	787	945	799	1932	1158	566	1208	1185	1130	707	872	1682	1929	1456	1093	1386	1615	1536	1116	613	654	1238	1334	680	1074	430	1546	294	1655	1127	872	1190	1107	284	468
163	1044	1219	1047	1110	763	1384	581	777	323	2222	976	1790	1697	1496	838	864	967	1840	991	600	1534	1119	1109	446	883	1801	1946	1232	1297	1333	1519	1429	1117	706	840	1355	1263	720	960	285	1405	291	2080	1006	1091	1442	1030	496	706
164	1151	1367	1131	1167	624	1517	1273	644	294	2315	1025	1734	1475	1304	720	850	973	1990	1065	358	1244	1030	1089	480	813	1724	1870	1516	1142	1369	1611	1566	1063	566	923	1323	997	430	1086	99	1102	333	1880	1025	1009	1632	1026	602	495
165	1094	1269	1021	1149	745	1496	1079	765	362	2262	992	1759	1838	1364	666	781	939	1881	1280	559	1299	1100	1038	529	867	2077	1756	1451	1264	1379	1578	1508	1071	830	961	1314	1139	703	1107	317	1505	456	1684	837	1100	1530	980	494	703
166	946	1231	864	1167	874	1405	1080	644	399	2235	1136	1571	1666	1507	638	979	882	1952	1575	530	1232	1122	1366	465	962	2144	1739	1404	1184	1177	1523	1436	1204	621	771	1425	1191	401	1169	434	1250	230	1732	693	1007	1672	1189	585	745
167	1009	1301	1145	1232	861	1398	519	780	322	2086	1014	1744	1524	1438	280	725	783	1973	1837	359	1208	1289	1637	791	890	1739	1938	1434	1162	1314	1476	1326	1088	782	1040	1243	1223	654	1183	477	1523	188	1696	877	1011	1707	1080	531	860
168	952	1351	992	1077	709	1380	641	801	214	2071	942	1680	1574	1441	626	751	782	2090	2029	569	1428	1073	1708	336	829	1750	1836	1286	1131	1446	1539	1469	1053	557	1041	1443	1138	693	1084	378	1456	500	1568	1039	1084	1706	882	500	626
169	975	1328	1095	1112	639	1350	1068	721	283	2078	1092	1664	1608	1538	559	776	856	1754	1854	600	1157	1118	1574	586	948	1843	1647	1495	1080	1188	1515	1342	1192	587	1118	1307	1227	650	1160	166	1617	238	1585	1253	1055	1884	921	422	743
170	1082	1334	973	882	784	1250	945	724	149	2124	1104	1807	1512	1546	588	716	834	1938	1903	588	1231	1111	1883	548	960	1916	1674	1439	1396	1414	1574	1295	1053	556	1394	1526	964	588	847	5	1388	239	1707	1066	936	1706	897	549	616
171	1054	1255	794	1057	567	1232	1230	679	189	2108	1270	1696	1840	1548	655	867	771	1729	1715	496	1091	1087	1873	518	911	1938	1687	1347	1099	1407	1505	1373	1140	642	1091	1629	1129	698	875	176	1316	424	1780	1150	890	1530	944	469	662
172	802	1263	952	1026	564	1290	1081	572	239	1897	1042	1476	1509	1499	582	909	759	1891	1819	736	1311	1005	1843	530	920	1849	1771	1368	1211	1358	1347	1181	1146	623	1175	1824	1160	470	913	188	1489	222	1412	1164	1032	1696	968	473	772
173	1029	1304	1101	1029	668	1102	1020	694	305	1925	1058	1767	1730	1733	648	710	702	2084	1820	640	1286	994	2029	642	830	1839	1808	1483	1017	1404	1610	1238	982	639	1245	1784	1096	446	947	419	1325	302	1706	874	1034	1531	858	488	558
174	1188	1429	879	1179	719	1253	1139	711	331	2028	1032	1631	1503	1564	579	787	765	2149	1645	994	1234	1033	1799	519	962	1574	1681	1273	1126	1349	1578	1187	935	495	1305	1861	1176	609	970	427	1288	419	1595	1102	1003	1688	908	462	539
175	925	1259	1151	986	707	1239	1044	618	371	1880	1087	1548	1821	1555	710	758	883	1873	1715	986	1187	1084	1779	492	934	1621	1609	1379	1237	1404	1548	1271	1144	650	1310	1904	1062	394	971	308	1359	464	1637	868	1217	1455	724	303	415
176	1125	1309	791	1165	767	1300	971	670	124	2181	1056	1576	1810	1550	867	872	810	2103	1769	1057	1283	1209	1567	537	990	1706	1836	1368	1186	1269	1569	1302	968	633	1075	2115	1163	450	934	206	1109	314	1667	1053	941	1583	951	563	404
177	837	1436	982	924	714	1235	911	679	246	2189	1309	1566	1603	1364	603	836	692	1988	1599	944	1357	1272	1648	456	972	2000	1744	1597	1143	1271	1495	1211	1076	648	1157	2100	1037	409	995	256	1410	372	1665	1243	1119	1510	849	333	522
178	976	1205	923	1085	564	1094	968	570	309	2201	1014	1547	1681	1411	550	977	575	1964	1553	1205	1245	1005	1810	567	1050	1593	1701	1408	1174	1381	1435	1062	1070	623	1155	1792	957	424	997	91	1438	334	1621	1172	927	1596	946	461	632
179	886	1168	1035	1113	585	1184	974	612	120	2322	1203	1621	1721	1416	789	834	709	1911	1566	935	1301	1163	1488	466	971	1741	1652	1312	1106	1277	1528	1199	983	657	1428	2101	1167	323	972	224	1177	277	1424	941	999	1585	1033	419	548
180	874	1277	988	1091	675	1251	910	823	118	2223	919	1738	1739	1360	589	544	615	1722	1539	1052	1444	1196	1606	517	1067	1462	1654	1300	1188	1354	1513	1356	1134	722	1209	1583	924	456	998	-38	1320	391	1680	913	875	1504	776	434	678
181	926	1339	1100	843	797	1303	913	500	287	2299	1021	1630	1819	1253	727	838	710	1946	1610	1121	1353	1147	1674	472	944	1564	1683	1494	1166	1378	1487	1333	1061	552	1379	1739	1029	290	998	354	1173	386	1631	1100	966	1714	760	456	649
182	858	1256	860	913	641	1260	927	538	207	2261	928	1489	1791	1188	557	751	661	1728	1828	1045	1421	1167	1660	364	899	1603	1608	1585	1145	1217	1603	1089	1186	744	1384	1841	986	370	993	150	1203	439	1569	1118	1075	1602	906	621	776
183	1009	1138	927	942	487	1481	808	598	211	2318	1265	1487	1852	1185	541	733	861	1710	1814	1049	1394	1143	1634	630	1080	2070	1811	1435	1072	1198	1611	1223	1055	663	1360	1544	967	506	1104	409	1047	241	1462	1022	1032	1473	853	484	396
184	1037	1137	1026	1136	587	1618	844	653	331	2258	1229	1463	1921	1269	625	787	654	1624	2283	967	1201	1098	1450	333	1052	1865	1673	1469	1092	1257	1498	1130	1165	622	1273	1545	792	377	1330	345	1217	197	1370	1244	1144	1660	788	361	742
185	894	1246	1067	975	699	1570	832	583	184	2414	1149	1518	1737	1149	593	832	679	1697	2676	889	1239	1136	1362	628	992	1808	1542	1514	1114	1262	1505	1179	1088	443	1102	1747	953	401	1137	437	864	260	1414	1070	1124	1490	850	586	439
186	1046	1162	1082	873	630	1347	864	570	248	2225	1493	1367	1749	1214	471	817	715	1556	2793	893	1515	1217	1338	344	1150	1601	1772	1350	1105	1391	1455	1183	1139	673	1338	1562	983	495	1302	189	1107	217	1547	1109	1096	1577	888	530	709
187	1069	1208	1027	994	497	1416	752	593	290	2023	1298	1455	1798	1082	496	701	639	1841	2809	967	1294	1167	1669	562	1021	1769	1580	1293	1100	1317	1518	1060	977	553	1307	1386	945	358	1076	-55	922	257	1350	1035	1033	1509	782	627	712
188	872	1098	944	973	706	1427	739	676	235	2202	1321	1406	1645	1185	403	822	750	1604	2691	762	1247	1153	1326	615	1132	1689	1611	1401	1077	1375	1624	1120	1096	662	1147	1362	828	417	972	203	1260	317	1330	843	1024	1550	814	408	478
189	969	1314	1222	1006	486	1296	665	757	273	2235	1355	1379	1453	1213	648	824	684	1618	2737	776	1281	1257	1336	417	1053	1460	1724	1647	1302	1211	1679	1200	994	575	1207	1362	1024	583	1173	276	901	291	1382	1103	902	1509	647	536	704
190	965	1278	908	877	645	1357	712	562	259	2226	1191	1392	1616	1066	485	628	701	1439	2440	785	1349	1053	1548	467	994	1596	1797	1419	1683	1284	1661	1130	1167	707	1208	1448	1083	361	1071	417	802	290	1518	1155	1073	1625	800	436	686
191	1002	1167	993	895	486	1208	743	661	280	2120	1482	1236	1540	1114	700	799	840	1520	2765	782	1302	1181	1310	458	948	1920	1735	1228	1271	1178	1597	1038	1046	758	1291	1695	997	360	1117	7	1022	186	1398	1258	1070	1432	747	621	576
192	845	1187	979	948	511	1266	646	551	262	2233	1457	1395	1530	1022	395	772	862	1460	2568	654	1223	1258	1364	463	1088	1690	1629	1283	1767	1203	1692	1033	1054	694	1177	1725	851	436	1160	350	1092	217	1342	1189	1124	1659	757	547	713
193	560	1000	1084	913	600	1302	876	663	69	2094	1395	1267	1558	977	611	712	788	1411	2572	743	1424	1225	1199	441	973	1934	1652	1478	1619	1233	1573	1055	1055	648	1096	1485	860	344	1187	271	981	264	1303	1119	1040	1393	815	687	694
194	926	1040	1085	1073	409	1308	890	606	189	2463	1403	1292	1606	1213	577	750	1041	1592	2302	667	1285	1255	1267	384	926	1536	1633	1477	1371	1327	1648	1186	1089	620	1273	1870	913	398	1125	184	1024	235	1421	1173	1091	1558	778	463	608
195	926	956	1117	831	606	1269	903	547	77	2254	1242	1341	1634	962	589	742	1022	1377	2531	774	1337	982	1321	680	922	1816	1380	1394	1721	1136	1559	1068	1163	707	1165	1917	1034	415	1153	91	882	189	1220	1109	992	1556	841	408	667
196	822	1070	1066	920	507	1059	907	686	211	2179	1268	1296	1714	872	539	736	981	1323	2262	800	1515	1199	1254	512	934	1763	1561	1448	1570	1276	1424	1021	960	746	1219	1855	1045	510	901	323	1162	209	1354	1159	1121	1375	682	565	469
197	807	907	950	880	607	1190	1104	658	289	2096	515	1236	1671	979	556	722	972	1462	2257	679	1297	1156	1220	418	884	1841	1724	1534	1254	1248	1530	1064	1118	719	1186	1883	926	179	1126	389	1180	226	1292	1353	1103	1605	696	470	414
198	855	1138	970	1122	611	1221	948	516	239	2054	1319	1215	1563	803	592	698	975	1536	2169	624	1116	1120	1163	531	840	1650	1501	1449	1523	1293	1586	1075	1041	593	1037	1573	1008	248	1005	257	1075	113	1152	964	979	1361	700	467	588
199	856	929	940	1052	448	1109	932	652	279	2065	1133	1168	1721	822	656	671	878	1567	2097	821	1293	1269	1243	392	887	1367	1533	1608	1231	1301	1394	1175	1150	627	1290	1881	1047	310	999	225	923	158	1342	1012	1012	1580	731	516	340
200	657	984	1007	856	506	1102	1217	629	347	1995	1111	1177	1573	960	531	639	883	1754	2025	809	1239	1128	1353	445	789	1526	1491	1424	1372	1325	1386	1028	1121	760	1244	1725	1018	373	1065	380	1213	103	1163	1107	1042	1577	615	611	315
201	547	1090	923	923	494	1133	1070	532	271	2099	1036	1162	1749	1026	364	757	836	1711	2005	822	1444	1219	1247	465	926	1472	1446	1359	1384	1109	1300	1126	1103	726	1306	1721	1077	331	977	142	1123	67	1272	1181	1066	1375	679	542	582
202	889	967	933	979	458	1131	1107	585	285	2154	1214	1046	1714	946	557	788	855	1736	1838	786	1323	1167	1194	392	936	1437	1302	1482	1366	1255	1426	925	1139	628	1303	1749	1106	319	1015	397	1251	183	1279	1408	951	1511	800	330	547
203	708	951	949	863	438	1099	1147	675	351	1997	1374	1110	1557	992	275	717	737	1675	1986	749	1248	1136	1147	410	852	1710	1548	1586	1468	1240	1395	1050	1079	731	1224	1723	1171	231	978	218	1020	201	1139	1173	1073	1497	786	279	532
204	816	991	934	867	374	1102	991	855	149	1893	1055	1102	1780	905	424	655	735	1608	1984	709	1299	1179	1357	471	883	1632	1421	1513	1438	1292	1385	998	1129	727	1230	1686	1144	287	986	20	1029	104	1304	1228	1083	1570	1028	486	576
205	687	896	812	866	385	1112	1059	873	201	1936	1269	1178	1578	900	594	557	747	1462	1860	671	1219	1269	1332	419	867	1444	1429	1533	1210	1330	1399	808	1110	596	1205	1660	1103	378	866	18	1103	210	1129	1135	1212	1576	1021	575	639
206	694	840	979	969	459	1040	1185	1089	78	2124	1072	1091	1674	823	516	565	822	1728	1777	631	1378	1036	1280	465	847	1613	1405	1531	1418	1112	1345	1081	959	695	1190	1748	1193	321	954	78	1050	88	1281	1194	1098	1488	886	474	412
207	627	947	994	832	414	1058	989	1227	318	1936	1129	1065	1599	743	519	691	767	1645	1679	694	1064	1274	1311	496	880	1498	1326	1431	1564	1138	1302	849	1143	561	1341	1630	1040	330	964	129	1123	147	1047	1058	1095	1595	892	447	483
208	579	924	988	935	347	920	853	1269	135	1856	1200	1011	1680	821	386	717	688	1684	1855	863	1245	1161	1353	381	1013	1443	1448	1574	1418	1305	1302	853	1112	624	1206	1723	1120	318	816	189	1111	47	1116	1359	995	1604	1032	392	388
209	662	841	1041	914	427	1099	882	1241	283	1821	1144	1058	1649	636	304	632	808	1656	1576	716	1356	1071	1268	535	872	1693	1196	1494	1305	1252	1324	1055	1036	663	1528	1794	964	240	898	200	848	149	1065	1009	1178	1314	912	367	518
210	640	984	1006	876	344	934	965	1153	237	2014	1053	1208	1604	853	324	787	731	1515	1791	685	1284	1123	1238	262	835	1655	1398	1295	1341	1091	1486	873	1135	804	1209	1681	1151	386	929	99	727	105	1239	1197	1300	1653	874	367	545
211	744	774	1039	927	415	968	932	1184	350	1870	1087	1080	1682	859	472	530	650	1580	1622	814	1454	1002	1194	567	871	1588	1397	1334	1117	1110	1331	735	1089	689	1293	1452	1081	329	854	-111	756	191	1281	1239	1143	1652	768	388	600
212	698	914	1192	759	400	944	763	1242	193	2105	869	1143	1627	838	490	625	626	1617	1474	546	1323	1101	1258	366	861	1515	1312	1526	1083	985	1411	782	1203	727	1281	1619	1043	314	957	319	883	154	1251	1105	1152	1749	802	471	392
213	644	935	904	843	451	910	826	1207	245	1937	1268	1159	1611	754	432	679	643	1524	1620	564	1302	1192	1352	339	811	1442	1193	1531	1500	1131	1503	899	1133	644	1102	1349	1084	374	739	156	920	-7	1358	1181	1209	1561	1028	326	613
214	750	1019	995	910	379	902	534	1186	253	2069	1035	1046	1664	948	482	746	606	1488	1504	789	1366	1097	1195	345	954	1519	1388	1200	1294	1096	1365	946	933	645	1197	1376	954	253	741	62	977	238	1195	871	1192	1648	943	356	359
215	652	848	910	878	354	851	707	1170	63	1891	1338	1053	1506	860	554	686	505	1401	1544	433	1372	1139	1335	277	779	1492	1283	1532	1292	1185	1285	878	1102	617	1251	1481	1049	289	757	266	1035	128	1277	1179	1042	1655	954	411	517
216	633	923	961	744	431	869	862	1137	138	1889	1142	1057	1550	656	429	696	570	1536	1529	727	1324	1328	1227	398	939	1384	1378	1539	1123	1067	1379	915	970	740	1199	1562	1203	298	898	50	892	89	1380	1040	1180	1528	772	341	483
217	576	909	897	843	268	814	692	1079	244	1966	1244	1274	1498	743	399	585	539	1319	1305	674	1383	1166	1180	381	725	1366	1375	1474	1181	1186	1465	965	985	611	1275	1436	817	297	882	68	952	184	1387	1173	1123	1531	764	344	543
218	663	803	794	923	333	856	667	1197	237	1853	1317	1128	1416	725	267	624	513	1276	1485	611	1247	1081	1242	388	875	1392	1310	1395	1222	1062	1541	821	1037	757	1066	1383	975	341	734	15	984	76	1285	1110	1101	1574	680	345	566
219	599	923	1039	619	333	856	853	1094	179	1691	1149	1173	1442	761	426	343	524	1439	1695	620	1352	1179	1130	369	749	1633	1192	1601	1152	1122	1630	865	1105	652	1106	1475	873	296	676	115	879	0	1320	1060	1053	1581	761	322	286
220	656	816	971	836	293	927	593	968	346	1886	1220	1014	1400	824	517	586	377	1168	1338	496	1338	1280	1245	291	695	1547	1305	1534	1181	1091	1550	785	973	751	1126	1368	1018	354	708	308	886	8	1210	924	1117	1346	898	309	423
221	629	855	1008	988	379	817	787	1071	208	1941	1172	1233	1448	787	422	702	561	1348	1427	550	1184	1156	1234	360	820	1259	1148	1380	1595	1179	1537	962	1042	747	996	1377	861	142	777	648	909	297	1263	1215	1146	1505	707	310	466
222	612	831	1066	639	423	827	717	1008	150	1618	914	1132	1408	849	376	550	624	1271	1359	609	1425	1145	1162	332	900	1416	1285	1354	1431	900	1641	842	1092	713	1146	1391	863	215	799	516	1033	181	1164	837	1079	1476	740	339	495
223	650	770	1194	703	420	845	581	948	231	1635	971	927	1207	772	253	593	551	1276	1274	554	1423	1209	1270	343	886	1276	1118	1392	1302	1053	1610	846	1071	712	1092	1225	745	126	856	685	958	41	1266	772	998	1458	751	344	496
224	550	901	1053	712	262	869	633	870	266	1733	1043	966	1300	612	348	525	504	1222	1330	511	1403	1197	1293	370	862	1324	1246	1590	1111	1076	1615	649	932	678	1084	1222	934	347	664	785	879	197	1052	830	1021	1260	620	333	548
225	604	768	1261	909	267	807	686	1010	172	1614	1336	1033	1323	675	318	638	658	1144	1292	540	1307	1210	1268	471	956	1510	1181	1308	1267	1094	1405	819	927	686	1040	1195	921	375	831	732	987	210	1276	881	1112	1359	651	291	195
226	617	838	1082	823	369	759	697	794	295	1524	904	1011	1269	724	404	440	493	1281	1179	507	1341	1303	1358	454	796	1322	1120	1453	1067	1001	1282	900	1128	680	1038	1267	805	242	733	593	745	80	1231	1115	1103	1036	643	421	592
227	500	770	1249	521	331	807	591	904	111	1678	1133	1000	1583	727	298	520	551	1097	1365	423	1286	1304	1201	416	893	1476	1161	1392	1173	1067	1544	763	1010	577	1102	1114	919	327	644	782	866	173	1212	886	1089	1376	853	214	433
228	416	855	1084	814	230	882	638	891	101	1544	1057	1263	1382	636	486	575	455	1121	1175	398	1280	1304	1114	326	831	1554	1174	1325	1206	924	1448	811	1048	674	1088	1087	1113	293	761	884	859	64	1168	950	1243	1428	664	361	351
229	565	790	1117	689	207	849	623	930	304	1666	1076	915	1357	693	348	554	390	1270	1302	584	1321	1301	1184	245	733	1424	1295	1529	1077	1047	1517	868	1046	614	834	1129	890	402	676	653	734	212	1076	915	1131	1306	712	266	388
230	661	790	1124	626	298	792	668	846	216	1488	964	1046	1106	780	344	464	572	1097	1377	483	1365	1070	1310	427	890	1324	1235	1547	1039	1000	1443	774	993	573	791	1076	768	290	598	672	841	82	1236	728	1149	1368	591	232	516
231	543	787	1134	670	20	809	596	798	-2	1598	1117	1012	1293	640	388	531	415	1062	1250	613	1395	1052	1301	348	823	1348	1290	1679	1283	1055	1387	920	1185	680	935	1125	933	279	712	661	638	104	1011	909	1272	1458	846	472	397
232	505	757	1159	835	280	621	638	889	194	1312	1015	1070	1206	867	451	435	464	1132	1184	556	1313	1070	1103	257	861	1470	1078	1513	1120	1026	1426	801	1034	625	867	1219	858	304	665	658	788	207	956	880	1202	1242	656	286	513
233	444	697	1345	688	300	811	664	955	86	1351	945	997	1195	724	420	561	446	989	1230	479	1423	1289	1233	378	808	1274	1127	1389	1207	1025	1538	691	804	674	920	999	840	301	765	710	811	93	1023	772	1008	1104	632	455	604
234	532	850	1267	689	411	599	523	846	185	1431	977	825	1218	633	380	517	408	1268	1219	491	1335	1029	1066	441	832	1604	1019	1355	1296	964	1423	634	1141	640	916	955	878	242	777	515	560	234	966	907	1098	1239	945	293	526
235	629	861	1114	715	305	743	636	972	209	1465	878	1109	1160	664	288	562	380	1105	1335	536	1502	1272	1426	313	799	1434	1168	1502	1289	928	1371	771	1032	641	1009	1079	806	229	586	458	882	222	915	899	1093	1238	657	306	353
236	631	779	1106	814	212	664	496	791	147	1140	933	1039	1131	764	435	459	415	1123	1231	426	1409	1030	1293	215	851	1411	1055	1339	1650	928	1433	790	838	849	839	942	737	194	535	641	831	148	1063	759	1319	1389	777	272	478
237	466	776	1345	912	154	769	750	750	78	1320	883	1093	1158	682	397	527	495	1030	1191	464	1242	1020	1305	410	807	1385	1051	1424	1145	1162	1460	753	1094	744	910	859	772	303	730	694	717	111	1025	714	1025	1342	715	499	386
238	301	617	1045	770	302	689	761	775	161	1200	820	942	1105	671	516	481	373	1089	1207	471	1382	1231	1267	407	930	1494	1146	1314	922	1042	1372	933	1024	681	813	1124	777	222	707	651	780	191	965	753	1204	1241	673	466	606
239	511	870	1067	683	436	700	614	681	219	1271	864	941	1182	691	435	529	469	1129	1144	437	1304	1098	1182	383	847	1310	1101	1398	1115	972	1416	702	1070	578	938	945	736	370	810	623	821	89	1062	748	1253	1232	720	300	282
240	523	701	1173	710	205	685	604	785	284	1242	999	1017	1073	735	447	516	446	1254	1144	620	1249	1204	1348	246	916	1321	1132	1499	1169	986	1340	843	1106	831	872	1055	792	135	542	668	812	112	877	1000	1003	1359	625	417	446
241	538	968	1290	749	242	811	502	724	200	1208	826	959	1121	684	304	474	549	1067	1090	382	1403	1056	1147	331	902	1596	1256	1368	1022	842	1413	766	1001	823	950	927	882	169	698	472	745	206	1013	803	1030	1346	701	374	461
242	563	939	1156	647	167	710	621	770	156	1151	845	1055	1013	661	261	370	400	927	1078	304	1271	1155	1311	322	871	1307	1066	1447	989	882	1395	715	861	648	785	1006	745	247	667	645	830	107	1080	734	1201	1331	881	266	525
243	329	807	1258	747	244	673	494	733	167	1114	793	897	962	605	532	444	316	1083	1103	555	1276	1065	1136	373	783	1240	1199	1675	1197	961	1276	809	1076	746	787	984	768	202	639	607	730	83	930	771	960	1326	719	311	262
244	581	888	1208	608	254	840	548	757	187	1215	950	990	1104	723	345	524	445	960	1229	393	1353	1191	1265	443	850	1150	972	1443	1166	952	1346	662	1162	622	905	909	836	216	703	447	811	70	913	815	1114	1267	769	513	471
245	594	726	1105	857	161	709	613	548	-17	1186	767	992	1098	705	413	566	501	887	1078	495	1362	1319	1277	311	896	1567	1231	1489	1278	906	1617	878	1102	615	974	877	638	291	652	493	841	244	900	606	954	1320	666	288	560
246	612	752	1294	736	140	604	624	615	139	1089	821	1051	1017	672	376	471	465	982	1074	394	1384	1162	1222	442	654	1411	1227	1356	1311	933	1374	695	991	840	864	984	775	296	790	453	573	235	979	871	1038	1185	691	508	407
247	522	759	1377	684	324	675	574	642	129	1080	932	895	960	585	490	446	440	999	1193	528	1171	1257	1121	365	840	1494	1163	1454	1249	899	1343	697	1015	736	799	846	801	241	606	535	711	137	1082	701	1204	1322	637	471	472
248	598	704	1134	702	374	692	496	649	151	1105	763	1011	1169	636	356	360	381	858	1108	507	1357	1075	1191	355	787	1248	1140	1393	1301	1021	1433	598	960	579	688	984	723	301	667	584	795	110	1054	824	1220	1458	592	447	408
249	485	844	1194	702	203	618	570	440	134	976	693	869	1023	732	206	477	431	1011	1159	445	1272	1238	1102	236	886	1360	1105	1448	1065	730	1311	760	965	678	990	845	836	157	617	661	756	0	1015	748	1233	1284	842	316	472
250	653	735	1142	887	222	666	557	556	132	1077	1066	1054	1115	678	454	467	459	919	1079	457	1469	1096	1213	317	690	1292	1096	1406	1265	843	1331	714	1212	724	876	1048	716	246	706	596	753	158	922	876	1079	1218	811	421	461
251	585	742	1241	744	132	763	495	728	87	999	924	924	1152	773	359	429	446	1142	1186	364	1163	1164	1260	345	853	1357	1130	1447	1164	982	1400	654	1120	620	843	943	790	409	655	599	592	8	1065	977	1209	1288	769	421	344
252	540	895	1185	728	319	661	440	715	202	992	676	979	941	664	410	624	353	1082	1145	444	1253	1181	1277	358	880	1351	1046	1524	1202	843	1400	814	991	559	782	868	620	235	656	597	700	87	914	698	1098	1203	655	268	417
253	602	819	1277	895	250	548	512	751	42	1026	871	1096	1165	658	299	460	418	1017	1131	326	1160	1142	1275	509	830	1514	1091	1461	1263	959	1338	755	1074	833	727	978	717	232	570	592	721	232	965	872	1145	958	705	347	469
254	508	958	1538	686	114	588	548	712	251	851	981	1152	1052	636	386	544	485	1039	1073	397	1370	1103	1278	362	719	1185	1125	1393	1246	999	1465	845	1048	778	914	846	657	156	664	606	658	48	982	635	1334	1300	785	324	490
255	545	726	1298	805	306	604	476	686	248	1052	897	913	964	651	388	467	433	1055	963	503	1284	1153	1122	350	863	1071	1147	1441	1312	1070	1373	853	1046	718	812	867	731	201	700	583	649	84	872	825	1094	1175	620	417	369
256	685	893	1193	741	139	678	624	609	106	895	796	900	978	753	362	573	416	1052	1033	485	1193	1182	1079	402	712	1263	1112	1393	1349	1001	1464	876	1203	598	821	862	860	313	659	589	745	207	828	960	1022	1130	728	337	639
257	552	880	1263	697	340	671	397	595	82	977	906	930	905	686	313	303	415	966	1044	487	1222	1212	1148	333	799	1395	1072	1417	930	899	1328	803	986	802	764	898	671	403	693	550	808	139	976	808	1161	1253	797	396	511
258	544	810	1031	780	123	679	611	576	154	1070	759	949	1027	674	381	479	458	992	1095	417	1348	1219	1376	256	917	1457	1132	1420	1354	853	1435	902	1019	727	807	864	789	252	741	570	772	219	959	906	1101	1273	569	152	459
259	402	760	1264	669	186	597	566	456	281	905	892	1144	946	661	358	434	432	905	1067	476	1310	1150	1470	489	877	1204	1238	1445	1192	863	1316	968	1089	602	747	951	686	336	708	711	670	135	971	834	1172	1186	710	360	451
260	550	824	1215	866	321	674	717	620	90	1088	853	991	881	783	511	499	311	939	968	393	1201	1238	1437	325	881	1659	1112	1404	1346	1033	1486	650	1133	740	874	896	830	248	621	547	740	167	1051	704	1037	1214	787	336	456
261	476	654	1022	785	167	638	465	561	173	931	834	835	1014	601	369	452	426	984	1058	365	1461	1065	1322	313	911	1256	953	1362	1156	985	1527	842	984	759	768	969	795	202	740	567	814	32	1001	748	1039	1222	783	410	354
262	524	847	1130	747	261	615	451	678	197	921	774	865	1038	755	415	263	355	1037	1052	456	1263	1191	1266	524	856	1224	1108	1522	1103	1010	1520	736	1117	640	948	1025	785	301	528	461	783	181	965	769	1197	1208	724	484	469
263	479	766	1017	830	116	783	451	583	112	853	825	923	892	590	439	473	387	971	999	458	1296	1152	1207	321	862	1251	1170	1713	1322	1047	1533	735	1018	571	765	791	655	147	753	506	728	211	899	760	1366	1270	633	408	450
264	619	935	1175	867	225	548	646	688	101	818	946	936	1067	606	477	410	511	1022	1066	565	1355	1101	1335	279	827	1602	1111	1524	1217	949	1606	745	1082	583	878	870	602	182	749	472	717	154	1030	711	984	1251	747	333	392
265	466	793	1006	629	337	683	546	583	192	1130	911	1033	950	578	366	398	469	926	927	394	1161	1135	1156	438	980	1316	1154	1412	1102	969	1538	842	1114	791	902	967	908	209	624	422	738	92	1112	812	1218	1099	704	430	509
266	571	697	1091	784	291	623	583	677	62	1072	872	804	948	611	296	498	335	940	958	439	1360	1038	1217	577	1133	1324	1047	1603	1228	904	1438	765	1115	717	908	725	775	179	726	537	634	143	953	711	1051	1204	684	401	445
267	523	788	1283	819	269	600	544	632	124	857	596	875	1115	674	492	466	450	1066	1110	380	1358	1265	1350	175	1165	1321	1045	1254	1244	917	1510	781	973	755	819	778	759	363	601	384	823	144	954	562	1168	1238	630	340	306
268	580	931	1125	903	48	598	386	525	179	979	860	1010	1001	731	376	396	458	972	993	454	1294	1087	1192	468	1062	1398	1127	1532	1008	985	1575	786	1160	540	712	887	935	322	710	512	681	178	1010	779	1113	1245	702	395	360
269	456	754	1154	814	155	711	469	604	-29	979	780	1015	909	764	449	522	460	969	1054	458	1225	1183	1340	284	1050	1288	1122	1458	1124	995	1544	972	1072	564	761	686	543	322	761	549	698	45	922	815	1071	1174	660	397	377
270	386	761	1184	915	284	588	572	648	21	888	964	963	1030	559	471	455	443	1023	955	413	1137	1088	1136	394	1149	1242	1143	1536	1375	890	1540	780	967	806	693	752	870	105	604	421	788	254	1015	673	1198	1286	621	431	416
271	457	915	1275	892	107	583	483	631	10	883	762	760	968	645	530	295	614	1029	1111	398	1329	1096	1272	315	1201	1349	936	1492	963	998	1443	853	1054	821	850	830	811	170	691	480	681	158	934	858	1218	824	671	425	411
272	714	800	1220	831	82	640	405	701	179	1041	906	931	970	673	326	483	360	1113	989	398	1308	1126	1277	327	1184	1480	1263	1495	1200	910	1438	787	1040	664	779	687	736	268	634	536	551	210	907	945	979	1251	727	392	528
273	467	766	1206	766	203	607	356	507	-18	776	774	1032	1078	721	372	370	426	881	1070	296	1439	1197	1412	391	962	1279	1174	1185	1158	945	1383	742	1099	569	878	942	793	203	698	522	715	93	790	864	1324	1355	601	468	441
274	643	795	1023	794	297	683	470	627	143	900	668	972	1087	550	437	414	410	953	1148	324	1261	1203	1238	312	1314	1264	1143	1431	1195	1033	1497	783	1060	830	809	801	625	264	660	461	684	73	1067	1055	1196	1386	759	273	518
275	568	703	1213	769	366	728	534	597	35	904	842	909	1022	717	315	374	449	979	987	345	1219	1154	1382	309	1280	1517	1128	1414	1215	983	1592	687	1104	690	712	960	724	362	772	531	608	76	978	862	1118	1194	719	426	431
276	563	921	1301	909	250	883	603	593	23	998	793	1002	1098	732	230	528	367	990	951	424	1382	1007	1234	306	1324	1243	1030	1452	1017	904	1493	849	1187	700	717	977	777	334	647	570	724	62	958	872	1192	1308	674	356	546
277	454	978	1205	1008	167	686	404	512	168	993	598	926	913	752	352	443	472	1035	1063	480	1272	1086	1266	380	1221	1353	1151	1611	1063	911	1429	817	970	604	963	735	743	367	640	507	754	123	1008	739	946	1195	793	417	471
278	450	935	1207	740	136	547	710	566	31	949	957	962	824	646	389	465	389	1036	940	518	1244	1229	1240	325	1229	1369	1070	1511	987	932	1529	766	1210	748	922	852	901	216	737	564	683	100	1008	654	1026	1265	690	405	628
279	528	813	1282	855	161	609	433	462	64	729	913	1024	1035	514	296	431	364	977	1045	382	1319	1065	1265	415	1186	1216	923	1424	1196	1000	1467	834	1094	590	907	923	796	250	752	312	694	14	855	955	1024	1157	507	401	516
280	426	825	1218	802	274	748	410	577	228	873	754	1199	973	804	404	482	363	1038	1056	457	1297	1315	1497	476	1333	1216	1057	1552	1272	1087	1352	725	1062	622	896	1011	732	299	779	568	710	122	1005	603	882	1197	713	408	431
281	532	781	1429	932	245	519	420	721	46	1016	777	1078	977	762	376	430	483	1010	893	482	1163	1250	1225	540	1270	1483	1204	1408	1405	1000	1410	748	1094	638	741	988	702	387	608	554	674	167	1021	800	1107	1207	862	448	413
282	763	781	1191	1048	166	759	662	835	150	852	824	964	1041	728	351	495	502	885	1078	328	1332	1177	1274	358	1377	1555	966	1477	1200	992	1549	854	932	793	887	822	660	175	615	505	706	143	968	823	982	1202	705	431	401
283	637	793	1276	553	278	587	612	859	164	932	712	1123	887	603	425	471	396	1128	1027	424	1257	1069	1356	290	1370	1404	1096	1524	1294	958	1521	795	914	719	810	903	688	305	773	410	640	269	1055	778	1166	1149	701	384	307
284	490	788	1314	841	176	632	448	465	-69	850	837	965	996	641	365	450	423	1004	965	395	1380	1164	1325	322	1201	1553	1150	1388	1437	859	1399	929	831	564	986	814	810	300	720	439	718	112	1024	721	1117	1197	565	433	419
285	539	983	1349	860	98	666	421	566	137	1092	961	1155	1084	582	376	459	353	1071	874	317	1296	1359	1304	359	1265	1425	1109	1469	1449	943	1510	763	1131	532	858	980	613	334	609	460	701	230	995	729	1196	1306	622	381	407
286	585	755	1376	764	148	514	432	524	173	1020	838	944	978	701	284	265	388	1042	1070	426	1301	1100	1391	392	1166	1532	1018	1554	1393	911	1395	919	1159	433	782	891	923	258	683	654	731	105	1031	839	875	1056	695	365	473
287	528	796	1232	871	-25	712	583	585	226	917	1015	1103	922	673	367	481	534	1178	1030	508	1279	1112	1372	357	1390	1571	1012	1510	1332	889	1449	722	1078	732	738	948	643	329	726	466	571	86	1015	699	1088	1280	719	442	147
288	469	840	1185	801	102	693	631	413	147	915	681	1148	971	761	332	440	491	1039	1027	471	1178	988	1204	329	1164	1569	1009	1469	1213	921	1479	774	1043	677	768	838	660	303	710	607	669	251	918	801	957	948	611	458	299
289	639	707	1242	876	266	721	479	778	205	861	843	959	825	694	339	445	350	984	1086	341	1249	1110	1151	301	1257	1621	1123	1471	1248	1145	1254	832	1028	734	831	954	857	283	658	578	547	141	1042	546	916	1421	555	382	476
290	574	848	1239	717	211	691	698	795	110	941	724	872	956	555	416	535	516	843	1086	486	1219	1231	1414	380	1263	1455	1186	1719	1391	1035	1486	871	1062	660	931	913	789	397	673	529	615	185	960	689	1263	1226	740	256	444
291	384	701	1188	811	306	600	509	355	170	865	951	1237	987	567	244	335	476	1000	1162	441	1284	1054	1148	444	1250	1538	1083	1649	1159	956	1450	855	1081	640	680	867	680	216	678	506	775	253	1169	752	1108	1184	803	498	366
292	400	763	1256	963	200	672	520	495	209	933	775	973	994	727	306	519	419	926	1161	539	1182	1118	1362	316	1247	1856	1189	1575	1097	952	1342	810	1027	800	793	917	623	137	621	415	786	102	852	652	1096	1214	616	480	587
293	540	799	1286	728	292	777	504	847	24	821	829	1057	995	685	312	494	432	947	1053	451	1307	1153	1308	267	1211	1647	1058	1256	1331	743	1411	755	1317	678	892	926	734	310	764	568	704	141	1015	889	1252	859	718	394	482
294	585	860	1330	633	215	691	566	852	198	916	745	1040	933	707	385	517	434	1045	1054	429	1381	1289	1275	336	1362	1595	1097	1508	941	869	1460	834	1050	655	797	1078	684	140	677	460	602	111	918	697	1303	801	606	394	632
295	525	818	1294	797	150	778	591	376	283	813	716	970	938	664	346	517	426	994	1055	459	1203	1277	1309	391	1222	1772	1155	1499	1183	931	1555	909	1037	688	728	853	708	178	679	588	781	26	1014	863	888	1372	721	396	449
296	616	816	1164	856	267	741	631	829	172	871	812	1102	1068	573	505	476	432	1013	1153	335	1312	1161	1429	472	1015	1623	1044	1511	1220	820	1566	785	1116	702	757	956	634	259	728	532	636	152	1010	757	1070	896	554	217	424
297	707	835	1304	834	324	654	539	753	76	957	777	972	1141	834	294	640	322	845	991	404	1231	1163	1352	289	1174	1668	1158	1354	1201	1171	1559	768	1079	786	866	861	904	71	601	421	764	211	975	684	1170	1260	756	347	442
298	479	815	1230	886	146	720	531	784	193	902	776	1054	1063	633	281	386	407	980	1052	395	1315	1104	1264	389	1135	1539	1217	1551	1353	1011	1523	743	977	704	801	940	687	206	649	596	689	168	868	841	1133	887	652	406	482
299	536	820	1263	802	253	748	503	464	203	1096	767	1020	1068	730	358	455	428	946	1153	402	1327	1010	1399	303	1218	1481	1145	1458	1427	943	1600	804	1126	543	797	979	757	299	640	568	628	93	867	744	932	1319	606	414	529
300	541	776	1366	867	296	575	472	410	109	829	872	1003	991	662	372	386	451	882	1187	596	1246	1219	1424	451	1240	1601	1161	1447	1121	847	1484	898	1017	649	791	987	665	163	685	542	749	81	999	778	1102	971	689	351	382
301	537	792	1209	1084	283	739	509	528	162	960	930	1022	1022	661	389	609	476	941	939	446	1165	1088	1621	306	1093	1695	1133	1453	1393	996	1534	858	1028	590	935	880	726	204	563	530	692	163	990	726	1205	1154	640	336	467
[truncated: 394 more columns]

## Sheet: WT,unc13,unc18,unc31 to AWAChr
Figures 3BtoD, 3F, 3G, 3S-1B, 3S-1F, 4S-2L, 4S-2M
AIA::GCaMP5A F(A.U.)
Stimulus:	AWA::Chrimson
Genotype:	WT
N:	1	2	3	4	5	6	7	8	9	10	11	12	13	14	15	16	17	18	19	20	21	22	23	24	25	26	27	28	29	30	31	32	33	34	35	36	37	38	39	40	41	42	43	44	45	46	47	48	49
Frame (Pulse at 100)
1	464	707	414	693	566	156	363	272	197	79	175	200	119	238	279	195	173	113	248	216	117	142	156	11	131	128	27	328	214	54	176	307	348	218	75	78	160	355	533	785	128	87	185	156	54	175	224	197	154
2	459	757	558	567	836	142	264	250	140	161	173	84	168	186	193	34	213	164	316	319	49	143	164	33	93	88	195	247	159	96	191	226	359	175	88	98	187	527	499	875	211	111	49	165	171	184	146	289	147
3	481	597	510	429	787	133	225	241	275	157	185	240	236	82	299	75	183	220	243	246	41	187	248	28	152	84	111	260	262	102	143	344	165	139	70	105	164	460	635	783	196	169	31	113	91	159	163	269	205
4	665	672	331	485	796	192	431	239	131	156	179	111	200	174	225	128	92	151	257	264	120	41	156	95	95	88	118	360	227	70	234	252	248	245	2	81	132	373	591	826	138	196	68	218	140	80	205	223	150
5	489	713	546	548	734	175	359	244	147	256	139	196	191	175	265	85	99	148	254	259	164	77	217	59	126	111	77	301	183	126	119	232	214	191	25	169	152	448	500	779	139	217	133	258	62	216	97	192	183
6	610	722	457	631	686	122	268	179	163	174	180	244	62	114	254	104	89	90	240	173	211	150	266	76	185	115	35	224	208	90	100	383	255	196	49	114	128	378	537	884	194	219	2	250	91	161	168	227	252
7	460	660	402	470	814	153	219	202	201	198	202	209	151	91	216	176	52	117	220	145	46	42	177	30	60	133	74	244	133	141	127	354	220	182	40	172	143	524	537	863	149	64	104	141	25	43	104	250	206
8	492	712	447	534	855	112	288	249	154	139	216	142	204	127	264	108	133	212	305	219	141	101	154	93	120	69	131	347	315	125	203	247	241	204	60	83	196	440	612	907	190	179	62	268	96	110	158	273	347
9	537	845	469	704	724	157	286	260	211	66	121	81	282	98	271	191	116	248	275	279	72	97	227	64	203	185	206	405	229	115	135	284	275	215	101	163	78	535	534	695	185	110	30	165	60	67	87	229	109
10	452	853	415	598	948	238	305	266	208	207	70	162	156	215	178	120	94	117	188	163	109	125	191	-1	157	146	73	296	221	117	181	397	298	142	-9	118	61	584	478	804	180	154	-19	144	144	72	181	228	174
11	495	676	542	503	1011	145	317	350	209	111	169	158	224	178	300	110	249	185	241	263	88	145	153	62	133	209	117	361	251	113	152	409	267	255	95	115	39	456	580	804	88	177	90	223	48	109	76	326	156
12	464	751	449	599	884	199	291	248	139	169	197	212	166	77	301	111	54	208	334	322	120	49	127	66	173	172	68	226	239	167	223	386	178	330	102	92	41	338	542	877	176	86	118	219	77	154	174	97	116
13	524	610	314	599	996	115	270	244	35	68	220	131	206	192	363	132	111	198	271	241	87	29	176	53	164	112	123	330	159	50	133	283	192	230	80	218	109	495	477	923	138	92	64	99	-9	115	119	315	79
14	414	773	350	505	1125	95	278	266	114	32	156	149	153	172	222	169	166	122	231	161	125	31	117	63	73	104	215	282	227	156	156	213	336	157	26	71	51	448	564	766	193	109	-48	175	120	128	161	218	61
15	558	735	288	370	1101	105	315	285	149	122	268	183	137	149	266	154	168	213	380	196	130	35	181	37	165	119	182	372	184	271	164	323	146	207	66	86	116	420	507	889	230	138	65	114	26	174	111	350	148
16	483	763	325	570	1116	145	363	274	238	52	223	256	178	174	345	143	185	159	264	251	97	110	124	43	111	63	140	216	166	134	152	243	211	270	36	114	-50	536	566	823	243	140	122	172	197	95	108	164	130
17	504	616	451	595	1110	97	316	282	185	167	238	276	283	259	297	76	142	178	268	211	86	65	132	16	150	226	129	214	176	93	151	364	178	125	147	110	65	412	524	745	154	104	47	134	116	183	130	157	262
18	438	771	533	639	1001	190	303	235	134	152	149	203	170	178	207	158	166	168	383	259	149	-10	69	124	108	210	-8	318	273	95	172	283	187	181	77	92	28	636	607	743	169	157	-76	224	66	125	82	341	150
19	367	743	329	487	1078	95	330	282	274	48	249	149	186	90	236	146	130	144	228	236	94	101	174	58	116	132	91	310	291	133	215	251	233	135	-11	117	101	378	506	786	194	151	70	152	112	101	162	160	283
20	521	642	441	452	968	219	296	242	136	52	240	159	248	205	278	122	121	195	242	336	70	45	164	95	69	121	96	246	253	171	51	413	193	200	83	79	98	389	599	739	197	119	55	164	124	187	107	305	124
21	557	576	485	571	949	157	279	272	209	76	194	221	164	90	223	100	66	128	292	199	40	62	130	122	140	115	120	288	232	226	109	353	216	201	9	117	18	344	663	799	119	149	40	158	42	88	175	188	207
22	453	581	514	550	1066	62	310	254	168	173	150	217	99	249	262	85	145	139	240	215	120	79	188	65	151	144	-3	296	228	141	68	327	214	161	69	105	71	459	610	775	137	133	22	216	66	214	141	262	-4
23	413	680	401	503	924	184	346	270	194	109	199	231	174	183	163	95	196	187	273	209	82	70	224	53	152	185	75	241	264	177	236	405	267	251	115	122	118	389	442	758	193	228	93	184	170	202	154	233	230
24	463	578	335	630	1129	134	346	222	127	115	144	172	129	225	229	66	137	152	300	295	96	145	224	123	105	111	88	336	234	82	204	330	291	226	54	87	91	286	610	886	145	168	83	198	40	131	134	148	133
25	428	723	550	461	1058	148	253	299	253	268	178	254	207	128	235	116	45	59	194	296	99	106	214	55	143	111	100	276	201	175	121	354	187	265	103	176	109	377	706	819	168	227	83	175	81	155	116	243	94
26	671	573	512	578	975	199	275	238	136	25	229	96	210	209	224	78	79	163	348	217	126	130	294	90	137	235	167	313	68	182	179	338	247	125	44	148	26	388	615	644	154	54	73	190	54	68	56	161	176
27	491	699	538	541	922	225	312	290	88	125	192	192	198	135	211	81	170	204	276	214	49	23	224	131	59	103	147	287	223	143	110	250	235	177	76	62	33	455	458	710	270	204	49	215	122	81	176	215	176
28	541	703	306	458	1016	87	316	247	167	171	174	209	148	158	225	167	169	153	313	240	62	109	316	75	74	176	32	307	150	2	227	346	163	234	45	121	64	556	536	817	197	146	190	171	-5	123	103	201	174
29	507	770	430	545	1070	117	311	371	135	145	237	209	224	155	298	146	168	203	269	119	136	75	224	101	46	136	41	235	207	154	228	423	227	156	104	190	-42	379	453	724	48	108	45	286	91	60	174	215	153
30	504	633	464	602	1123	91	251	223	192	128	166	263	199	131	122	94	88	197	278	261	130	37	124	58	144	117	50	273	195	183	89	225	203	179	55	85	84	441	611	820	175	177	47	154	138	75	141	262	110
31	551	656	348	656	1080	111	397	230	90	100	166	167	164	170	305	96	136	150	270	265	88	14	219	38	151	141	171	194	262	161	129	284	204	184	29	120	36	426	464	804	160	170	168	132	127	130	166	268	167
32	591	886	469	583	1200	152	303	179	249	61	212	161	195	141	175	186	124	197	233	388	121	188	280	80	106	127	184	245	295	168	167	435	246	249	91	192	117	381	485	808	211	150	18	166	68	52	145	253	221
33	659	681	371	651	923	135	274	250	92	126	193	355	243	119	265	37	197	233	351	289	170	117	280	20	52	142	105	206	215	59	123	325	231	244	60	72	18	478	455	729	126	125	-17	223	113	54	191	308	182
34	480	589	357	604	1127	98	329	214	100	134	98	270	152	241	270	132	181	184	319	265	149	47	191	115	126	124	84	291	229	133	184	158	252	238	46	111	33	460	604	853	117	114	93	178	54	106	160	146	66
35	569	723	543	512	1051	175	328	199	145	146	168	201	149	136	211	54	80	313	377	288	101	7	159	96	92	188	112	195	180	147	117	321	241	155	22	113	74	482	666	781	174	87	54	160	57	149	96	235	157
36	699	742	521	594	1140	129	286	253	148	125	85	128	218	147	236	101	56	110	272	241	202	71	108	65	120	166	101	260	254	166	127	238	133	184	85	166	127	568	618	806	229	148	39	279	92	178	198	170	77
37	671	705	428	561	1176	123	365	203	190	225	124	213	214	167	212	145	137	265	336	252	181	120	202	60	63	187	249	315	323	90	141	310	271	199	17	143	28	392	418	961	275	177	141	325	92	144	203	266	11
38	600	877	445	496	914	151	298	96	175	137	205	144	140	263	184	50	174	190	213	241	74	98	217	115	48	156	120	267	151	97	150	241	225	189	116	105	25	412	517	884	179	162	11	128	103	92	103	332	105
39	633	706	457	316	1060	167	291	181	214	124	182	165	110	140	283	128	108	207	281	232	158	52	157	117	112	80	63	234	287	155	202	318	377	203	48	104	51	492	517	634	183	183	139	257	104	132	71	148	67
40	585	775	429	389	894	185	418	237	212	102	210	325	152	121	213	101	130	221	383	210	149	128	260	129	101	110	101	245	240	146	93	290	381	232	60	147	119	495	665	818	140	141	13	221	163	130	145	132	165
41	602	761	503	413	1057	189	242	180	157	156	284	181	154	80	229	109	82	262	248	246	95	57	206	114	27	147	75	254	245	94	99	299	291	254	24	64	74	465	590	827	89	189	-4	218	100	124	25	202	149
42	566	650	493	244	1061	175	362	307	164	135	169	132	193	104	277	169	165	98	190	213	133	83	219	77	82	127	153	215	260	197	109	377	288	212	36	97	106	417	553	791	115	183	73	87	91	234	57	143	231
43	524	745	454	424	973	169	265	277	98	106	204	214	241	175	273	140	152	272	287	288	118	25	262	94	134	144	234	394	229	106	214	333	226	208	73	179	85	386	593	669	120	165	48	242	31	56	72	217	114
44	681	815	540	364	1078	134	273	180	270	161	226	134	229	74	187	199	135	191	337	134	141	164	169	111	124	150	126	284	215	163	89	374	264	228	44	6	37	375	529	848	168	123	99	176	91	231	66	224	181
45	603	648	498	508	958	192	376	257	231	161	164	213	126	107	154	42	168	214	237	216	160	63	252	98	120	116	153	219	158	103	168	261	269	258	31	54	77	333	420	708	147	171	-23	306	42	158	142	222	212
46	574	697	549	321	1077	84	362	251	189	122	159	186	187	146	335	159	136	237	219	242	128	116	196	3	134	170	56	308	177	70	92	250	341	198	-20	110	105	453	546	697	164	121	18	124	89	154	76	186	122
47	468	645	407	484	1035	158	262	329	167	194	111	267	178	116	244	105	161	198	260	259	107	132	126	33	111	179	42	227	248	131	136	324	185	149	53	66	39	372	585	1091	146	160	-35	209	45	79	113	217	203
48	628	704	383	600	1042	161	340	185	171	100	337	97	189	142	191	106	163	231	283	211	171	4	254	70	135	44	193	186	105	172	151	320	314	200	49	37	105	358	455	742	173	125	43	181	61	156	133	214	241
49	666	745	422	241	1071	148	239	211	200	86	369	125	187	124	201	36	95	151	206	300	113	154	109	61	90	122	160	264	243	115	83	330	261	236	64	100	95	530	490	697	172	200	86	426	60	62	138	165	226
50	565	745	363	152	1142	167	303	227	151	152	194	223	180	118	234	139	135	154	193	199	149	94	244	42	183	241	98	182	189	164	67	336	288	192	152	153	45	474	528	722	173	198	79	352	110	98	56	252	167
51	741	796	467	181	1032	120	310	163	115	134	113	135	151	115	261	90	105	130	264	261	154	172	187	98	152	84	25	244	234	120	130	305	238	254	26	96	43	429	500	867	207	189	98	314	92	83	135	280	167
52	636	571	411	153	1116	235	434	305	161	128	136	193	197	157	286	185	100	256	293	264	59	46	172	83	136	75	122	273	179	114	239	360	343	256	11	95	104	360	588	662	171	126	-9	383	103	180	153	196	190
53	487	812	588	141	880	200	383	292	73	97	194	188	283	91	105	144	91	218	336	151	137	131	214	18	121	89	173	234	234	127	183	298	323	237	-9	114	89	582	547	839	148	137	21	302	51	60	148	206	160
54	636	819	484	313	1104	205	274	228	56	185	121	170	203	213	227	107	141	188	277	287	109	127	263	20	121	94	88	196	218	102	123	339	236	169	44	169	45	482	603	840	222	219	62	360	-17	105	143	159	239
55	561	786	315	80	1026	169	357	222	184	203	135	185	194	278	212	98	88	139	230	144	73	49	102	72	37	115	153	280	194	101	224	249	238	174	46	100	123	463	489	726	155	98	-33	557	21	227	105	205	152
56	490	753	379	155	950	164	293	283	136	95	192	171	232	124	276	144	109	286	296	332	119	87	167	87	135	210	226	196	87	124	82	242	261	166	73	68	71	511	556	791	127	176	-84	439	77	77	80	112	98
57	773	727	583	260	1028	227	325	239	214	175	154	223	212	114	265	77	182	168	405	251	96	49	150	22	61	178	78	121	164	79	135	244	293	206	38	139	50	442	650	774	153	202	54	559	90	52	216	140	114
58	589	632	469	166	1114	164	230	180	216	195	142	186	161	175	317	17	234	191	260	326	91	125	194	98	39	204	39	262	144	101	175	284	360	145	165	81	85	395	454	781	114	137	6	333	76	197	86	230	157
59	615	746	449	67	1047	156	352	281	215	232	158	231	312	104	190	15	147	239	246	224	96	99	181	99	120	126	46	238	182	155	91	314	248	180	45	42	92	428	482	776	211	262	112	406	55	123	186	195	174
60	559	749	477	87	1117	117	387	239	166	155	255	231	207	114	239	117	183	110	263	266	129	49	281	78	134	88	98	322	136	201	198	279	214	225	13	96	28	372	549	781	201	214	135	292	191	177	247	247	124
61	579	669	462	263	1129	152	281	246	132	187	171	124	149	32	156	112	165	289	292	256	175	103	209	108	112	204	47	182	123	34	142	328	255	173	-12	125	53	471	485	811	108	165	57	245	102	171	197	140	108
62	683	724	474	62	1143	181	304	195	205	87	132	257	255	126	264	83	140	129	220	183	129	99	110	-3	162	95	109	258	157	84	188	282	232	221	52	180	26	524	493	639	189	163	75	439	125	124	90	182	41
63	622	880	438	146	988	86	321	313	132	126	202	193	136	191	248	262	172	161	340	323	170	47	217	15	71	156	179	286	210	158	159	358	235	143	46	148	36	503	552	834	73	118	90	304	90	65	81	167	214
64	458	838	442	110	1114	215	308	206	107	191	152	176	134	208	183	73	121	236	273	194	102	112	136	47	56	105	135	243	158	186	161	401	162	218	29	63	35	437	485	717	217	158	73	363	56	147	73	95	130
65	789	710	500	150	1163	108	337	210	229	185	93	159	280	126	131	1	145	251	216	218	192	33	200	22	130	131	132	258	115	94	156	239	265	185	107	173	72	397	401	817	171	84	53	261	26	212	162	54	202
66	597	903	316	258	1010	178	243	117	92	80	80	219	210	115	202	22	142	201	300	303	114	92	186	75	82	145	13	320	217	120	133	364	174	161	58	155	10	568	663	822	146	201	109	412	81	195	124	254	189
67	635	629	475	203	1053	117	199	175	235	113	166	234	255	177	202	109	72	146	228	57	117	35	149	92	130	170	12	188	204	115	147	305	235	213	78	90	120	477	545	711	102	171	23	326	130	116	182	143	154
68	848	610	459	-21	907	112	276	185	145	167	227	185	178	180	205	54	194	155	237	264	78	80	198	26	58	184	100	229	202	213	199	301	258	247	78	180	53	555	572	736	188	167	-20	315	115	-12	214	278	217
69	693	738	430	224	1001	150	206	294	93	108	248	91	97	150	139	74	178	230	351	245	199	28	166	33	178	152	259	221	65	173	91	298	171	140	150	45	21	511	557	754	171	138	144	372	46	108	144	60	164
70	594	580	438	98	931	202	315	248	256	170	199	123	239	128	165	74	155	170	301	183	82	91	168	126	78	203	72	195	161	125	112	276	232	194	132	92	161	490	694	775	172	153	18	402	58	139	143	334	118
71	428	850	347	238	892	97	286	231	184	107	201	116	201	142	231	93	179	181	329	339	171	75	232	53	78	108	155	179	193	220	131	269	259	210	2	122	39	432	688	837	254	145	30	277	-10	144	92	323	135
72	318	664	538	142	994	125	248	169	64	207	201	239	176	186	152	105	195	265	295	258	207	128	214	171	198	154	117	178	212	114	178	281	259	166	11	70	58	409	587	719	164	222	47	300	123	168	55	137	123
73	594	779	450	42	1003	190	294	196	79	58	83	266	185	74	123	88	88	251	256	273	222	21	237	87	47	154	143	208	152	116	111	353	152	159	89	124	61	401	628	624	155	100	136	309	22	161	171	261	66
74	510	744	563	302	968	134	317	180	145	83	171	196	187	171	245	151	74	218	222	239	163	33	136	107	136	129	127	305	163	113	111	265	210	205	132	86	105	324	681	733	174	97	75	366	95	109	119	317	174
75	638	619	530	316	907	113	320	198	186	179	169	161	172	131	197	156	130	88	367	317	85	74	139	50	172	149	127	345	235	124	133	271	242	262	37	124	106	422	716	773	179	144	79	333	10	211	174	206	124
76	381	823	344	211	1014	121	345	291	177	218	166	176	159	75	198	93	182	106	305	258	174	121	175	116	31	128	212	254	176	85	157	378	217	230	114	105	77	545	672	707	147	119	96	165	144	294	153	191	181
77	558	706	404	246	1017	104	440	217	147	52	193	146	194	200	229	106	91	195	264	251	183	160	159	110	118	154	73	185	243	152	160	391	227	269	88	115	7	370	606	708	148	76	60	254	107	172	160	206	106
78	626	636	481	334	1094	95	282	280	101	111	110	136	145	144	224	70	98	136	162	274	104	122	248	44	114	149	117	282	223	162	76	351	219	255	180	123	119	326	654	577	175	103	96	274	103	263	143	170	265
79	675	858	468	344	1136	137	272	241	170	111	156	163	197	166	214	135	117	175	213	197	60	124	158	17	202	195	151	260	159	163	158	348	217	249	82	157	100	491	633	707	144	26	52	349	123	178	130	115	192
80	627	760	515	204	1068	145	373	249	183	304	164	215	254	185	273	157	39	131	215	283	186	115	193	135	168	194	52	266	219	178	180	240	230	206	75	155	46	416	611	877	54	94	117	290	133	153	125	184	166
81	591	497	536	251	1038	247	248	274	165	105	232	166	149	116	189	47	175	140	295	136	161	103	284	140	119	120	152	211	224	123	110	260	283	218	48	96	19	439	601	739	204	108	-8	227	96	191	119	184	177
82	524	706	556	379	932	249	324	252	193	172	214	140	174	163	160	210	153	108	167	308	61	52	158	57	70	86	118	267	205	53	177	234	240	222	96	111	69	536	528	792	154	96	66	312	162	186	98	286	76
83	448	782	357	323	1108	129	337	216	156	99	97	173	152	138	215	23	135	102	322	278	93	55	219	64	63	94	131	193	198	206	53	333	182	198	68	85	66	405	616	757	292	156	14	265	219	133	89	177	239
84	633	778	434	221	909	261	227	313	275	182	140	146	210	98	183	96	195	200	201	226	26	123	202	102	37	86	-17	231	186	203	110	267	176	211	59	83	124	352	444	848	104	157	-16	228	195	223	136	162	87
85	554	789	624	145	1117	133	295	238	122	131	236	155	193	98	180	84	148	248	204	178	117	77	169	178	94	167	139	273	223	134	48	382	200	155	57	187	114	642	699	925	180	163	0	219	256	149	152	204	112
86	570	853	416	400	910	133	280	205	109	76	247	160	166	143	160	91	163	139	245	261	96	86	121	37	88	164	54	342	255	92	95	319	152	303	55	123	44	357	606	897	161	166	57	293	201	84	122	247	203
87	504	923	544	315	965	211	202	230	199	186	202	140	84	148	248	153	182	150	263	216	165	62	220	73	68	125	66	269	162	195	133	279	163	144	58	75	117	512	797	839	230	177	46	322	305	280	219	217	264
88	485	774	422	292	817	256	303	168	162	119	204	228	239	137	248	48	86	175	277	245	235	87	245	51	104	146	53	118	243	203	170	283	198	131	77	141	129	453	615	948	151	140	16	290	219	149	134	171	163
89	545	676	453	328	785	17	332	225	148	114	172	146	169	217	212	62	122	104	183	189	241	71	297	70	95	169	106	229	196	74	115	328	273	206	58	163	21	497	592	794	190	106	1	241	193	108	112	177	153
90	598	657	463	251	844	173	249	183	168	197	164	163	159	112	150	63	125	185	308	254	75	114	292	98	121	126	124	234	149	76	192	271	234	201	77	197	96	488	509	773	170	101	120	148	183	101	82	200	229
91	375	688	317	371	913	222	297	206	167	130	81	171	207	174	257	104	159	90	239	241	112	96	159	81	110	184	119	207	164	80	111	211	130	96	79	170	80	574	761	691	183	123	111	223	125	104	46	193	165
92	443	717	491	210	880	185	376	280	144	164	190	171	249	135	259	109	234	217	241	215	130	117	145	42	92	119	107	166	127	84	100	344	202	218	52	152	117	575	702	769	168	177	18	185	231	162	104	251	180
93	519	806	367	335	946	131	249	267	226	213	130	264	252	242	137	96	75	190	142	168	205	24	166	-40	100	116	165	268	252	134	89	385	154	186	53	67	74	451	632	843	166	119	56	350	229	130	128	168	193
94	625	830	399	233	647	222	292	284	124	132	95	132	149	68	214	45	107	217	279	257	135	112	219	162	114	174	-8	302	234	148	211	189	183	218	83	49	69	267	687	808	165	57	28	211	296	117	136	53	251
95	565	754	561	328	765	170	217	202	228	159	378	148	159	209	100	144	74	187	290	189	105	86	196	91	76	160	186	183	165	100	123	304	191	211	46	49	135	353	568	707	162	123	96	153	184	156	113	279	105
96	582	566	447	362	901	105	176	232	171	156	282	200	174	148	233	119	127	206	247	215	29	91	152	57	85	102	177	364	194	221	164	325	108	174	129	115	116	473	605	744	181	110	6	334	194	133	186	177	177
97	569	747	368	384	859	102	315	333	173	221	162	238	161	82	172	176	37	177	358	281	190	158	177	64	207	56	45	297	97	88	200	360	196	246	-35	133	136	514	591	849	327	126	73	349	205	124	161	254	168
98	473	798	520	310	703	165	255	277	187	220	238	184	205	81	164	126	297	216	304	303	182	24	242	131	77	175	19	200	156	107	129	276	188	228	50	126	106	512	719	728	148	65	83	269	211	170	109	61	33
99	434	619	586	342	845	85	228	263	153	142	190	263	158	224	252	161	98	157	222	246	182	81	202	135	134	68	89	269	202	119	184	287	191	134	131	117	76	464	679	896	272	147	138	208	168	171	154	94	169
100	537	707	372	340	687	224	217	306	154	155	233	208	229	193	284	132	176	224	227	356	145	57	185	-39	115	78	191	267	232	81	53	334	146	231	127	108	58	464	557	758	130	152	-6	262	148	206	193	164	119
101	335	731	424	617	742	226	217	179	161	154	221	85	176	167	106	223	113	146	204	212	166	119	158	83	104	91	140	226	140	246	138	266	245	228	63	73	101	458	687	818	172	220	63	160	94	173	45	113	123
102	593	718	518	494	564	62	277	135	194	130	192	196	216	101	241	44	193	206	270	164	127	127	161	79	112	56	111	285	180	92	193	398	205	318	132	54	95	498	688	729	151	183	29	236	239	105	53	281	332
103	527	570	317	332	768	148	343	233	172	194	138	232	171	153	177	176	124	268	229	226	98	128	182	-16	155	170	83	292	184	195	171	338	212	219	25	45	110	356	606	796	89	137	28	184	230	107	160	192	140
104	471	682	395	470	803	174	289	283	113	109	122	153	195	141	300	222	138	265	277	332	48	89	235	69	161	132	195	249	137	172	126	335	214	250	-13	148	95	395	566	851	232	148	14	163	86	167	227	263	178
105	523	625	522	577	737	99	219	253	191	69	206	212	144	100	155	142	172	173	209	188	130	55	184	-37	143	113	90	207	170	136	186	261	115	173	140	49	17	470	725	855	218	121	103	262	239	223	109	175	155
106	474	754	391	381	708	143	314	228	122	87	161	324	166	123	213	149	195	190	276	217	85	100	174	101	213	116	135	312	130	178	220	266	171	198	109	169	39	508	591	907	141	168	50	191	175	127	193	205	64
107	466	761	334	459	667	196	351	272	193	122	136	249	218	118	164	127	214	245	342	199	154	68	242	79	89	119	105	228	173	168	181	298	100	220	73	121	102	418	605	814	150	205	13	147	187	77	167	180	95
108	468	700	447	417	901	108	311	251	149	159	196	198	169	212	195	180	76	226	347	197	109	50	169	130	133	161	131	243	120	109	144	328	234	230	130	74	98	399	525	825	130	270	101	315	214	209	176	276	303
109	522	843	459	461	854	51	299	215	159	234	208	179	200	165	235	123	154	201	298	315	113	114	216	60	143	149	161	243	140	161	101	315	205	174	71	87	45	409	604	868	93	131	56	166	283	193	141	174	105
110	551	646	437	206	738	199	330	237	110	229	182	202	148	149	333	257	165	239	307	238	92	0	167	90	119	161	92	194	186	165	86	296	228	245	105	236	26	501	696	933	142	99	58	193	122	188	89	99	289
111	693	792	497	306	902	116	371	242	114	173	274	189	204	100	277	265	232	273	305	319	158	78	210	119	71	152	165	247	81	141	195	294	165	198	101	161	-21	460	703	800	165	195	78	235	228	217	107	122	58
112	574	617	491	351	1006	125	198	298	170	151	263	251	219	115	542	255	303	268	253	319	118	36	141	26	123	132	87	251	192	144	130	393	205	200	107	94	108	479	582	1147	187	151	33	257	93	211	149	180	181
113	546	779	526	250	869	155	303	250	131	230	266	271	303	228	500	310	163	353	258	333	95	153	272	131	87	163	108	238	125	215	138	329	172	206	184	99	148	340	765	1137	155	153	63	188	177	179	115	80	75
114	447	651	437	258	954	173	218	338	181	113	136	219	334	184	486	228	211	310	380	332	263	52	224	204	89	91	87	255	125	225	110	225	209	250	48	126	58	393	554	1249	194	74	68	286	144	139	179	161	145
115	649	629	568	192	911	192	257	275	138	186	110	146	472	270	462	258	249	257	226	385	168	33	195	167	236	155	102	236	195	178	126	348	131	268	79	202	91	445	628	1235	110	137	46	127	145	203	120	117	189
116	601	797	389	234	828	141	316	343	97	159	176	170	511	160	474	326	275	274	218	367	165	40	215	166	210	89	152	54	209	231	216	343	190	199	211	93	71	462	779	1337	163	122	134	274	194	329	202	219	106
117	535	859	553	150	799	141	294	224	262	251	258	214	341	217	532	248	261	320	357	393	192	129	207	155	137	165	197	193	165	255	187	366	268	325	168	152	28	257	597	1101	193	168	91	223	56	195	180	202	168
118	785	815	409	300	825	182	291	132	359	233	254	157	343	123	493	215	232	244	355	265	273	112	285	197	106	154	124	183	165	273	208	346	191	323	205	134	162	486	677	1283	81	144	121	63	96	134	132	207	249
119	713	696	422	48	800	106	352	290	318	175	170	232	447	161	596	240	209	274	238	360	167	146	141	153	129	181	125	208	244	242	100	380	140	290	165	169	7	494	757	1258	154	132	58	270	30	261	128	219	171
120	710	740	402	221	784	105	402	243	359	122	122	242	522	77	448	256	213	292	304	340	100	113	216	126	164	143	134	174	307	137	126	319	201	302	185	89	26	525	729	1357	162	159	125	251	86	113	72	223	164
121	678	580	499	227	899	311	251	220	363	191	110	176	485	325	409	269	263	356	300	281	164	40	156	165	33	281	104	238	274	300	163	380	120	366	124	187	39	373	732	1162	210	181	77	169	8	204	98	151	339
122	687	707	500	93	879	199	244	233	302	343	172	190	398	160	406	224	204	344	372	338	186	127	232	167	161	143	174	284	206	281	140	493	189	289	196	142	74	501	643	1046	261	115	-4	149	172	218	33	157	333
123	737	786	458	8	883	94	328	210	498	311	201	252	519	187	364	209	243	361	329	358	129	102	216	168	118	118	2	123	178	275	184	351	146	401	169	134	26	564	625	1149	137	127	89	149	156	174	134	205	252
124	874	689	507	-150	853	235	400	258	439	302	127	302	519	209	410	198	293	253	245	292	163	52	140	69	69	137	145	139	193	154	206	404	240	326	211	153	-4	316	556	1076	141	240	100	139	182	196	108	89	385
125	808	966	380	-116	863	154	295	250	306	233	257	248	512	282	463	191	219	287	300	310	96	32	219	168	140	110	154	190	216	127	198	327	212	311	100	131	-5	507	680	1312	251	144	48	133	69	181	244	208	281
126	779	674	346	-127	839	142	258	378	349	242	112	243	382	146	425	208	232	220	294	276	192	113	173	55	182	119	143	179	237	293	165	397	164	329	77	136	93	520	632	1253	232	132	-7	182	77	400	251	259	262
127	811	862	430	-113	939	178	275	199	415	296	250	214	456	197	401	226	345	237	256	301	119	126	197	124	56	209	168	145	84	218	134	419	90	306	170	195	128	486	621	1212	229	184	61	199	143	275	110	228	246
128	687	717	436	-109	662	153	259	205	424	319	215	228	431	257	455	226	264	173	232	409	161	59	257	143	110	147	75	231	216	158	147	406	156	331	102	121	13	520	466	992	132	222	-57	193	17	346	200	290	312
129	841	780	534	40	668	98	244	238	438	282	270	247	380	132	379	145	203	188	275	372	175	67	172	279	105	128	74	276	215	281	189	331	176	241	150	94	80	537	692	1285	181	199	39	216	125	430	221	244	404
130	836	801	544	-35	745	114	330	383	384	173	220	201	472	149	380	181	254	285	291	407	110	83	168	203	140	176	137	125	179	205	185	479	139	382	146	168	130	527	640	1105	166	179	32	248	154	421	148	214	307
131	669	803	317	-121	753	136	346	279	339	280	212	240	529	205	342	228	273	264	282	317	126	71	267	232	114	207	144	194	179	192	195	387	252	380	290	126	130	451	538	1087	109	134	58	224	120	403	196	168	408
132	792	828	450	-223	790	51	241	292	277	247	240	271	553	127	413	240	204	216	331	408	142	54	94	114	121	85	171	157	237	139	237	484	273	347	124	143	144	631	619	1155	116	124	79	219	164	395	166	210	298
133	324	660	516	-129	767	68	373	351	304	245	179	227	502	102	367	187	249	195	375	316	183	102	204	166	98	103	211	229	187	273	93	573	293	258	209	163	88	612	600	1118	183	68	8	202	77	337	172	117	217
134	701	785	480	-74	773	68	361	423	304	261	160	259	420	126	328	175	245	195	316	351	120	142	190	200	93	116	83	269	290	180	95	299	247	368	157	172	99	466	622	1049	129	189	21	149	77	350	89	252	308
135	914	807	446	-27	790	100	432	375	385	344	141	225	374	181	290	177	342	253	245	356	230	68	158	107	97	275	126	208	130	254	145	487	339	322	188	150	137	361	548	1151	181	202	60	122	82	341	265	140	329
136	740	981	509	-44	766	145	525	254	347	229	194	217	349	175	259	211	300	139	298	250	105	65	195	125	158	129	79	285	205	214	140	526	302	304	99	213	32	503	581	1257	151	196	66	161	122	398	152	246	338
137	758	820	383	24	625	224	552	340	320	270	205	226	418	196	290	127	359	233	223	321	167	68	191	184	116	182	116	219	219	273	129	413	279	279	126	150	106	465	548	1226	161	127	77	193	56	352	168	185	343
138	820	841	524	-98	655	223	423	203	269	207	244	275	395	223	331	204	283	323	240	259	107	39	241	68	125	307	163	217	156	297	119	427	234	300	164	189	58	507	660	1303	253	167	24	175	-20	278	192	95	319
139	688	864	496	-143	621	78	687	321	364	205	299	338	358	129	307	148	288	137	342	413	134	42	254	144	98	271	115	235	237	209	124	369	284	283	189	178	142	339	655	1371	214	257	71	303	71	329	182	286	252
140	784	840	371	-67	652	86	573	289	301	232	246	205	442	204	302	123	261	164	227	339	211	86	272	146	164	276	80	190	150	215	107	461	366	255	186	124	47	647	736	1287	161	118	16	137	57	343	273	153	303
141	942	857	424	-54	764	140	532	219	238	250	145	329	453	152	306	147	306	223	283	380	107	70	199	95	125	249	73	177	188	222	102	524	357	272	237	137	61	417	688	1288	251	175	8	155	145	364	125	232	266
142	709	985	539	-126	491	90	447	210	243	279	168	211	495	227	342	195	293	222	301	240	196	76	269	112	77	266	150	218	179	150	173	390	302	259	165	152	90	433	994	1399	231	98	119	268	70	360	204	171	333
143	717	828	440	-23	588	123	456	275	265	171	168	130	586	203	289	234	309	242	293	374	204	114	238	179	128	353	135	221	183	188	164	340	323	399	209	111	129	490	615	1389	103	189	64	216	184	318	148	188	384
144	669	699	464	-87	689	188	594	240	276	171	238	201	402	132	202	218	305	192	299	377	140	72	168	43	171	284	68	207	135	139	201	425	288	263	134	131	62	544	768	1401	269	149	138	189	117	398	154	314	412
145	773	632	545	224	570	69	495	252	329	184	127	258	422	102	325	142	363	298	346	297	292	106	202	218	96	337	176	194	211	136	128	515	268	244	137	168	72	454	689	1551	309	114	-66	161	153	263	115	151	314
146	680	782	426	403	486	113	306	242	233	259	208	211	488	101	239	90	281	334	291	328	226	85	285	134	82	278	96	122	277	201	151	508	275	227	157	71	168	442	613	1298	272	103	96	75	-14	345	224	177	275
147	643	738	505	386	587	140	412	285	419	288	276	265	490	132	349	159	356	296	314	445	215	107	275	255	142	251	86	331	222	193	153	526	309	309	200	172	108	432	724	1430	219	222	99	210	100	357	108	167	347
148	763	705	370	458	628	168	421	291	180	158	255	198	368	139	315	175	339	386	290	291	127	50	235	243	140	329	116	217	219	291	155	405	225	333	167	96	123	497	652	1264	343	121	68	263	143	221	201	161	366
149	675	820	235	428	498	173	636	337	246	132	97	158	362	158	268	133	384	379	341	382	222	144	297	179	101	244	160	226	182	177	137	492	295	292	115	184	50	488	459	1285	261	150	56	134	136	389	176	193	492
150	665	833	431	479	613	134	416	198	309	288	174	304	382	195	435	98	390	356	270	433	118	75	288	83	70	229	72	193	229	215	126	457	142	277	149	126	59	459	501	1307	335	162	63	189	80	283	268	147	342
151	714	732	469	335	511	220	433	243	210	203	294	237	433	190	224	183	328	329	205	484	247	143	152	82	191	281	165	315	125	215	215	448	213	246	153	100	139	560	832	1587	369	220	123	328	47	214	205	175	404
152	776	675	443	270	524	114	445	271	303	310	231	161	429	205	267	156	350	365	389	408	209	94	220	107	116	254	179	220	221	135	135	449	292	218	150	115	111	532	751	1343	256	162	119	177	98	224	168	182	372
153	737	660	323	390	527	161	445	309	231	102	176	258	415	199	330	211	413	362	281	295	145	145	154	168	144	330	158	176	123	277	165	487	333	183	154	102	159	568	637	1354	289	358	38	196	162	253	148	231	312
154	881	578	450	390	597	99	375	300	275	349	111	272	380	122	236	21	460	343	382	401	153	165	249	124	123	248	117	309	151	225	177	399	178	240	159	186	150	643	684	1308	248	274	142	199	161	262	140	237	293
155	738	660	426	478	654	360	496	323	383	182	234	177	346	223	246	146	332	405	251	514	267	50	227	169	108	313	110	280	249	178	118	437	350	259	152	4	95	501	774	1544	256	191	54	209	39	309	201	252	333
156	793	725	497	297	483	80	457	402	279	238	225	280	322	154	191	154	274	335	256	622	143	120	253	78	129	256	124	276	201	141	142	452	189	234	117	110	66	433	728	1179	253	287	-20	131	57	242	282	208	301
157	694	728	296	404	710	150	334	380	316	214	182	221	291	123	247	160	277	569	168	549	145	-16	290	98	66	233	200	179	275	205	134	452	312	239	174	178	119	409	689	1520	338	211	120	192	66	205	165	168	229
158	695	862	316	377	509	200	325	405	195	173	273	283	320	115	225	223	341	365	308	584	127	102	210	32	148	340	238	264	214	159	228	428	191	280	134	183	56	334	647	1425	177	147	64	143	-14	229	134	225	293
159	866	845	539	495	587	137	502	364	400	165	219	230	278	210	297	298	331	397	334	598	166	81	226	206	68	113	267	209	222	324	100	457	210	278	159	149	36	500	690	1305	245	192	94	174	83	257	149	319	253
160	718	698	328	361	584	150	513	304	427	228	92	197	344	37	276	227	306	399	272	496	209	48	169	117	191	284	195	107	155	243	109	507	205	295	203	97	193	483	554	1217	240	218	52	108	-1	307	163	124	289
161	701	784	541	285	605	172	356	365	350	237	156	203	318	157	229	193	339	283	336	573	206	76	211	135	88	162	225	216	73	159	21	465	306	304	75	125	66	560	698	1213	298	196	28	144	126	332	284	330	426
162	713	727	334	455	594	204	428	276	378	209	206	154	272	94	196	242	317	390	216	489	269	156	225	112	80	153	194	62	91	152	120	429	223	112	146	95	106	383	694	1492	352	212	34	227	99	172	192	185	281
163	670	789	567	308	558	128	301	293	504	181	152	273	212	162	170	290	237	348	409	544	184	43	230	106	189	180	270	225	193	64	148	503	305	275	152	82	97	459	693	1593	237	170	139	169	113	448	137	186	235
164	807	828	447	366	622	13	415	346	566	309	180	192	337	77	324	268	182	292	382	532	144	132	281	122	181	230	154	258	158	239	122	518	291	173	105	155	40	389	622	1800	248	317	50	162	51	230	237	214	247
165	655	772	516	493	414	257	233	339	438	272	265	166	276	103	327	216	403	300	431	397	206	61	270	173	210	271	184	201	174	100	156	567	181	343	145	217	44	495	555	1806	324	233	26	184	108	263	174	198	314
166	845	656	458	471	645	144	249	383	373	237	152	217	319	81	299	235	274	395	290	462	175	81	204	53	151	167	242	276	152	251	179	436	352	263	145	171	112	455	773	1590	259	268	59	175	43	287	206	243	199
167	886	861	631	381	462	96	334	323	355	291	203	174	293	117	191	288	261	387	346	420	137	83	141	94	128	112	129	318	194	253	187	513	227	199	131	132	81	508	487	1634	333	111	-3	175	64	346	208	329	228
168	733	730	446	408	629	114	426	300	372	232	284	174	222	189	140	147	291	489	353	413	187	109	321	124	119	125	141	200	186	186	270	516	217	180	59	128	103	590	476	1655	204	121	166	240	53	259	138	142	249
169	696	707	599	445	447	166	329	246	416	239	358	167	278	98	244	222	150	459	356	473	136	44	142	110	78	128	169	210	220	190	124	455	265	182	108	110	178	407	772	1514	213	188	140	178	78	253	160	305	230
170	624	730	348	290	473	152	205	335	412	179	414	217	291	75	234	288	261	488	282	459	140	107	247	150	100	203	150	194	145	201	138	553	321	200	167	100	109	381	556	1546	222	245	82	146	108	245	164	283	293
171	700	762	435	391	637	145	383	362	371	295	327	214	256	112	302	192	199	447	353	469	220	194	240	125	89	139	210	245	108	161	109	595	279	219	163	143	41	517	529	1472	169	269	21	211	28	288	176	222	289
172	714	753	360	401	562	228	353	362	340	199	257	224	352	125	259	219	134	521	250	516	56	186	193	130	106	168	191	345	212	156	106	402	210	186	90	97	47	504	506	1467	153	84	53	203	83	220	251	268	185
173	736	521	479	362	765	239	237	389	352	104	378	206	254	70	349	220	292	583	242	481	152	192	303	134	76	172	102	179	195	172	150	552	254	156	56	162	113	473	647	1564	213	227	45	224	50	283	357	256	134
174	760	687	437	271	540	68	342	296	429	160	267	239	247	140	184	186	218	447	322	491	143	64	197	38	215	165	173	318	183	221	149	521	189	212	155	117	155	560	699	1404	211	189	97	192	168	160	130	266	275
175	703	700	579	424	642	163	294	265	492	140	338	208	245	145	260	171	247	507	229	402	136	84	254	100	154	106	161	320	171	216	140	501	157	149	188	147	145	407	711	1435	159	316	79	243	119	204	72	163	246
176	834	835	486	340	701	203	292	331	402	265	333	302	217	135	283	155	247	612	444	503	67	50	192	130	66	137	126	332	197	209	149	489	208	193	111	150	120	594	608	1331	223	172	94	199	74	167	266	240	305
177	690	815	473	181	505	198	232	364	357	283	370	285	387	142	161	103	230	533	232	456	173	114	154	124	102	173	184	320	208	230	176	437	193	161	35	92	104	509	528	1340	181	180	5	277	87	147	81	235	367
178	788	758	342	412	601	160	371	320	294	264	322	210	305	181	265	254	290	511	347	402	199	124	263	217	1	78	170	213	101	122	17	406	217	259	63	256	111	432	732	1385	187	167	-19	241	83	221	109	193	198
179	827	820	398	409	557	124	219	372	248	140	303	133	261	126	202	216	300	551	236	503	86	70	171	121	123	145	194	302	150	192	142	456	137	225	91	111	136	465	706	1333	202	154	60	129	196	216	183	194	75
180	690	830	502	359	565	215	286	315	432	207	213	273	242	203	307	187	437	460	408	317	135	132	205	136	134	100	200	317	164	131	241	435	283	227	141	155	92	619	787	1328	341	194	44	247	116	246	205	265	192
181	631	809	529	227	536	152	284	331	302	124	340	175	226	193	156	230	392	361	290	402	162	23	190	129	89	102	157	348	187	155	142	575	254	249	99	130	137	528	694	1429	218	232	-9	183	84	230	164	133	218
182	740	601	409	315	600	192	228	371	321	151	271	181	278	68	267	151	474	440	318	348	156	67	192	126	120	122	146	335	145	170	183	486	209	227	163	126	81	430	676	1266	199	275	54	231	30	147	139	209	218
183	617	845	504	313	633	216	187	344	260	141	242	176	277	144	160	165	500	414	371	427	116	27	131	135	123	171	185	376	123	149	47	450	250	213	104	146	134	472	637	1330	174	278	105	141	140	157	128	351	80
184	742	812	458	279	647	190	241	345	309	185	240	341	241	148	198	176	487	480	306	359	125	68	236	92	128	145	138	282	158	82	215	307	237	140	155	170	91	327	812	1163	149	137	102	198	-28	176	176	104	266
185	445	916	493	324	679	98	370	367	320	222	323	194	306	149	256	182	455	481	331	560	172	40	192	70	72	105	141	287	107	163	153	480	350	270	49	111	88	507	758	1492	211	93	12	205	81	252	225	233	216
186	642	788	408	296	585	212	186	197	366	152	330	219	282	213	192	112	450	422	367	417	135	153	175	64	160	167	206	227	152	170	89	412	327	192	82	159	83	335	771	1381	175	128	-21	213	84	98	209	314	258
187	727	703	608	194	693	190	226	326	299	228	260	188	299	148	218	148	507	466	305	441	173	106	164	84	110	95	44	193	276	173	175	503	352	173	66	179	27	483	447	1365	155	185	14	241	76	244	162	133	194
188	613	676	432	369	626	195	299	310	275	185	337	226	326	100	313	122	457	446	306	454	167	41	240	151	131	138	-5	273	108	122	155	500	302	164	174	56	65	502	606	1118	142	190	75	262	101	284	145	287	97
189	667	842	471	422	478	131	323	310	308	171	293	163	340	129	150	197	421	398	196	474	166	111	157	74	55	171	151	245	163	212	186	519	227	195	117	129	49	634	685	1486	196	102	71	211	127	105	169	289	179
190	499	710	408	326	560	174	279	256	340	197	246	94	120	209	267	106	431	356	382	403	102	56	125	79	133	158	160	330	181	103	164	392	300	193	84	64	137	434	604	1392	261	87	19	168	45	143	143	240	253
191	540	875	515	388	593	136	256	270	292	119	288	205	258	215	154	78	504	341	309	423	119	113	238	24	192	117	182	258	162	152	154	448	312	198	113	51	91	562	576	1331	202	67	33	184	164	151	219	223	218
192	527	861	462	345	550	189	244	216	263	214	250	194	274	187	247	133	455	385	284	482	166	-7	210	134	255	197	73	335	182	198	73	524	301	178	106	163	161	513	798	1337	186	208	88	129	100	133	169	136	159
193	625	708	425	208	527	101	257	261	364	143	76	250	255	166	266	141	473	445	318	549	165	132	168	124	102	88	107	289	158	148	137	424	290	121	15	130	100	584	757	1259	165	124	93	150	112	151	214	251	169
194	547	854	557	332	545	182	268	310	278	202	299	207	204	117	173	145	376	373	317	380	63	67	190	102	141	142	62	263	277	99	154	407	245	190	70	148	98	403	679	1168	220	118	-45	146	69	154	43	199	175
195	515	822	342	322	713	186	229	256	354	214	227	234	225	201	284	68	475	395	289	591	177	87	169	76	155	151	64	248	201	173	94	395	233	198	152	145	61	522	600	1368	198	158	4	222	66	236	65	267	132
196	490	778	643	225	528	115	200	363	368	165	283	217	178	199	267	88	334	349	309	548	173	103	153	87	93	148	154	271	309	128	118	407	314	156	34	85	159	488	459	1248	164	85	-7	190	224	197	221	238	273
197	679	814	638	233	630	124	287	311	326	200	281	139	210	190	279	151	385	345	319	349	145	94	206	167	167	124	132	205	245	159	138	504	349	165	47	99	172	391	528	1247	200	213	56	282	84	168	160	113	180
198	627	809	378	277	582	154	371	342	370	165	208	233	277	215	170	74	388	280	213	489	135	107	219	100	141	216	158	253	209	88	263	334	349	307	112	151	84	470	537	1105	253	148	83	212	60	99	133	300	156
199	471	866	494	171	580	171	204	230	434	218	274	215	216	201	175	108	387	289	302	478	160	126	170	136	191	123	180	269	188	108	194	383	303	147	96	170	49	409	555	1241	170	111	-33	202	64	285	104	339	182
200	612	778	459	223	584	89	390	306	312	263	142	255	196	253	92	245	429	234	296	406	131	100	178	171	187	69	86	102	135	200	77	373	264	210	136	144	60	523	437	1250	196	114	77	156	34	201	132	163	246
201	717	788	466	205	461	124	213	301	394	165	156	208	193	270	260	108	513	380	275	493	90	130	172	17	116	120	183	191	198	144	145	470	239	107	103	126	24	315	575	1337	157	199	-19	234	124	264	192	299	68
202	486	811	433	317	565	225	229	230	386	208	210	238	193	262	182	89	500	300	338	443	153	103	146	130	93	204	123	306	231	130	149	360	338	135	98	101	187	556	680	1254	133	92	107	229	183	90	193	329	201
203	536	769	331	286	588	93	203	360	323	188	187	231	185	197	250	102	529	376	224	461	132	153	222	40	68	113	110	261	211	172	190	300	310	115	95	127	65	515	508	1360	180	148	152	142	127	60	194	176	169
204	399	833	253	328	517	191	390	237	324	269	218	151	199	176	207	137	341	222	233	372	204	88	171	33	173	71	120	245	227	95	71	405	316	218	116	129	134	523	546	1254	157	91	88	192	94	154	159	194	257
205	730	687	522	117	629	173	283	340	427	136	234	144	298	213	222	75	438	294	316	393	84	85	229	87	52	176	59	328	144	156	113	348	319	133	35	128	86	392	609	1236	195	183	-15	242	69	122	242	153	100
206	454	835	585	299	548	156	442	242	358	114	237	211	250	142	265	140	356	335	276	312	121	105	160	34	193	105	118	301	221	111	108	292	322	72	74	124	100	478	681	1243	243	152	34	403	-32	184	119	177	140
207	683	799	290	298	595	80	306	235	312	250	256	185	232	231	316	165	391	288	292	438	152	18	301	140	60	143	129	209	228	139	67	275	333	90	37	79	81	315	472	1155	132	170	8	143	80	147	248	214	250
208	628	857	490	202	508	182	381	254	345	225	112	113	220	262	235	34	425	269	272	342	89	230	227	26	88	109	74	307	273	115	211	342	342	111	156	161	144	371	711	1160	181	13	108	276	87	145	176	148	158
209	537	770	465	217	500	148	246	321	338	161	245	209	225	211	190	65	390	309	356	365	109	85	140	136	144	184	68	220	177	185	108	453	267	183	2	100	75	465	630	1095	64	184	2	177	86	182	204	196	219
210	515	785	416	124	578	201	280	289	304	126	172	221	220	128	212	120	350	312	279	417	195	130	235	138	123	83	126	289	305	232	145	347	349	166	122	118	76	393	539	1064	167	161	35	312	100	173	158	208	202
211	580	881	525	189	511	163	390	262	333	148	203	174	281	152	170	107	362	328	326	256	134	97	189	33	137	83	109	257	235	176	116	388	200	123	48	146	95	363	599	1070	133	147	-15	321	296	174	138	212	81
212	509	685	389	343	483	150	253	185	237	85	256	271	222	131	269	78	427	211	197	343	127	101	244	-24	92	167	105	217	207	133	78	417	273	163	99	163	120	543	599	1111	150	124	88	204	161	33	66	190	140
213	499	840	246	143	641	192	242	346	260	216	238	170	170	222	257	212	399	276	216	297	150	121	176	65	132	67	108	219	260	149	178	312	214	93	88	114	121	571	522	1127	35	139	32	157	271	65	104	248	76
214	446	697	497	153	478	71	213	252	349	246	165	220	195	217	231	70	370	272	255	296	129	205	191	101	131	155	121	203	245	108	134	399	253	176	27	83	9	434	543	1167	169	135	-78	245	197	177	93	181	113
215	410	780	402	170	605	62	293	290	294	136	148	248	159	294	243	59	310	274	317	358	109	50	235	56	96	126	122	202	231	119	104	392	218	204	28	145	177	331	667	1155	144	144	23	212	92	121	92	262	222
216	537	803	455	207	510	162	215	259	320	194	162	218	79	129	211	118	370	341	213	398	265	117	253	68	149	59	59	182	197	178	39	429	314	74	96	142	64	509	600	1248	163	160	32	276	208	148	217	155	168
217	559	774	483	153	583	138	282	223	236	226	168	200	144	144	193	36	233	373	314	305	126	57	110	189	190	125	83	283	334	90	100	380	216	180	104	30	167	375	439	1285	136	237	-27	346	125	86	112	194	174
218	409	819	557	213	468	184	340	190	170	162	225	218	100	181	252	79	191	285	430	306	201	117	246	173	143	51	156	239	183	199	106	182	145	135	81	97	212	399	678	1083	199	192	66	202	138	123	166	165	55
219	562	737	315	184	521	130	253	188	248	206	144	200	246	194	342	40	249	349	197	338	130	88	203	150	133	149	140	195	298	184	239	463	214	249	32	48	136	353	559	1355	263	112	16	213	154	75	89	161	75
220	516	679	421	160	492	159	370	387	279	119	282	167	125	180	204	122	325	347	331	217	94	120	241	123	159	33	68	221	309	221	185	299	249	180	136	123	87	476	380	1135	138	123	101	182	269	89	150	273	211
221	424	909	627	212	603	145	198	250	214	150	180	239	83	145	130	265	265	225	280	267	107	118	226	140	47	170	166	302	311	53	202	417	318	167	137	76	110	521	573	963	164	141	88	120	207	159	164	250	44
222	453	779	390	295	567	108	250	232	124	196	189	235	202	202	223	114	330	322	232	319	180	65	135	171	211	112	120	196	297	101	166	352	169	147	236	161	51	553	600	1022	214	198	13	230	96	110	67	274	91
223	461	803	412	99	504	124	284	250	251	178	260	224	337	128	290	83	295	230	286	371	114	15	188	106	96	142	148	221	252	80	93	351	256	183	106	57	52	524	643	1121	99	114	64	217	73	101	113	246	158
224	579	728	491	134	612	125	268	210	158	162	181	199	139	125	202	176	274	292	223	293	226	96	145	98	180	129	69	158	236	88	187	314	193	117	63	98	52	598	600	1124	167	92	168	208	137	199	100	142	158
225	446	734	376	197	528	112	187	239	185	72	174	271	234	93	273	123	239	307	328	205	175	53	238	55	224	184	211	248	244	144	199	368	256	160	104	126	146	416	508	1203	102	107	23	144	88	115	90	143	76
226	459	753	400	7	637	166	186	304	172	120	187	241	268	196	282	118	240	234	272	297	58	55	165	28	93	137	136	173	299	139	121	401	191	136	156	161	141	375	631	1194	133	176	3	327	126	61	159	274	172
227	400	917	533	274	592	215	314	281	249	182	202	194	263	221	247	43	275	233	260	372	132	64	273	48	102	224	165	279	258	173	43	294	211	151	116	190	92	446	676	1093	271	200	-49	222	102	146	133	329	100
228	431	714	519	350	514	92	213	227	207	99	172	313	138	164	216	97	197	199	391	231	153	82	264	40	183	172	89	224	256	154	57	350	196	116	82	110	86	514	744	1117	200	267	112	232	0	73	150	224	283
229	469	639	516	263	483	121	168	256	259	144	317	369	196	97	100	60	206	336	242	285	147	150	201	105	183	58	109	149	328	94	203	282	234	208	53	107	117	423	559	1203	139	163	63	243	120	116	170	204	47
230	467	732	310	243	519	196	251	266	163	219	263	160	214	105	168	81	220	209	364	237	46	10	174	161	149	116	171	285	289	116	100	309	253	204	62	143	63	467	684	1021	118	43	115	177	46	61	14	172	206
231	497	793	448	158	558	182	158	229	194	184	338	210	119	137	175	133	186	287	307	353	119	103	170	21	168	74	125	222	317	195	104	386	167	124	87	172	20	535	495	1185	202	77	40	138	182	146	154	291	134
232	539	784	325	258	702	183	286	310	137	117	222	203	136	131	174	94	164	289	315	239	182	88	217	73	87	147	68	163	165	141	113	322	215	134	62	112	142	534	664	1112	40	173	-29	201	162	66	197	207	147
233	424	832	336	355	773	89	229	328	165	209	245	268	263	91	151	-39	199	322	225	316	172	87	171	53	160	170	110	286	311	89	118	264	165	147	103	91	177	415	643	1073	187	147	96	267	114	148	177	226	222
234	506	942	450	269	671	148	188	324	357	220	225	189	171	12	210	151	186	322	307	226	95	114	270	54	130	94	103	262	237	144	150	302	167	153	156	147	26	521	436	1079	151	90	23	263	110	148	97	193	106
235	644	764	233	332	472	131	218	217	125	232	250	337	250	149	327	118	114	340	327	290	159	121	195	146	21	83	141	231	234	141	204	371	191	85	97	77	89	445	536	1236	145	151	75	241	109	126	233	151	140
236	387	735	385	243	691	102	366	190	196	206	259	178	242	103	269	122	203	339	238	186	73	150	133	86	160	266	125	214	223	210	147	232	183	202	107	93	83	416	587	1219	168	155	150	189	85	91	160	202	117
237	716	789	452	274	699	250	223	310	140	169	132	309	215	103	188	-16	137	339	221	264	195	107	180	24	140	148	91	234	273	116	187	352	121	228	171	117	100	534	515	1123	162	221	45	293	4	126	75	262	52
238	438	687	449	254	597	207	314	181	253	166	153	280	239	109	216	131	177	269	339	213	174	9	181	68	174	181	38	244	191	195	178	389	154	217	90	169	33	548	654	1153	158	140	7	218	11	122	80	306	172
239	445	847	361	137	648	222	237	207	238	139	201	284	166	176	235	77	121	277	197	293	116	127	210	20	172	150	97	205	240	127	169	317	189	248	72	113	58	399	463	1114	93	109	48	215	131	36	53	187	236
240	542	871	446	226	611	223	303	297	178	195	202	321	152	110	166	53	158	241	361	226	51	180	269	92	186	98	142	192	277	177	147	288	218	142	144	107	100	605	599	1268	80	189	66	61	39	141	150	277	82
241	496	794	471	241	593	106	263	198	93	154	119	227	247	139	237	43	141	329	306	287	168	35	147	63	127	197	115	129	158	100	194	324	120	114	19	107	160	484	459	1097	128	136	-15	208	124	180	56	227	209
242	357	706	494	265	658	147	233	266	148	148	190	279	236	162	199	62	148	198	261	263	109	81	230	132	76	148	81	176	205	141	263	316	255	166	38	146	99	397	609	1292	131	150	43	163	92	209	96	167	131
243	544	827	487	191	558	227	320	186	107	186	139	188	193	136	203	122	83	323	285	282	80	123	192	63	137	84	29	181	245	154	119	314	217	175	68	146	56	498	719	1066	214	110	47	158	39	118	36	231	103
244	502	790	518	257	646	182	333	198	220	121	170	184	259	241	229	128	57	269	395	207	166	-31	212	33	140	218	152	257	278	187	193	290	171	187	89	89	63	560	555	1127	122	211	84	141	-29	107	156	216	78
245	644	813	327	351	707	104	171	317	192	282	120	169	185	134	161	75	174	236	282	329	164	154	202	28	6	62	70	319	254	175	147	174	185	172	105	205	130	476	697	1109	114	144	-51	149	52	127	67	175	170
246	600	669	410	178	702	164	297	226	235	162	93	239	201	101	278	110	108	269	396	323	89	26	223	65	89	40	206	140	71	100	115	259	92	193	71	188	75	583	559	1080	138	157	17	230	40	101	138	157	198
247	550	797	536	212	602	172	343	232	63	214	68	276	191	205	268	25	300	209	327	218	167	77	267	57	104	122	103	259	240	147	145	266	192	79	53	87	161	566	603	1142	90	195	106	226	66	19	132	176	272
248	442	726	529	152	576	165	275	279	107	163	281	249	264	136	194	172	148	301	379	284	30	139	228	124	152	86	122	293	178	160	127	338	217	71	132	92	111	510	587	1177	159	175	54	200	126	170	100	208	211
249	503	728	481	158	574	156	360	203	181	144	104	171	322	154	251	135	175	315	246	358	150	79	199	147	157	126	38	244	196	157	210	392	173	180	173	129	128	551	745	1029	160	123	34	206	141	134	148	267	95
250	520	705	524	133	595	214	246	181	212	185	139	281	167	107	272	166	216	270	292	257	102	166	249	113	156	135	78	224	158	176	172	257	193	226	45	121	60	582	554	1177	196	195	2	224	82	125	179	278	77
251	513	884	369	285	484	168	189	292	134	302	213	284	195	110	291	63	118	309	290	226	185	78	164	82	126	143	74	251	226	174	162	278	158	125	109	123	-6	583	456	1236	245	164	117	183	59	159	181	160	112
252	510	708	405	244	606	156	216	243	163	218	252	254	107	61	251	96	66	211	262	354	62	111	183	78	155	209	72	172	267	171	174	260	242	146	124	103	160	444	557	1208	180	132	6	185	-30	199	195	278	72
253	492	851	503	247	602	191	253	217	234	173	214	301	130	200	360	71	223	342	211	252	134	-1	187	107	33	124	77	285	214	154	116	426	25	141	113	192	36	632	490	1206	104	127	155	241	81	0	127	314	62
254	618	675	463	217	567	141	338	213	141	202	145	284	236	105	218	66	170	312	427	274	118	92	198	87	69	200	101	243	252	170	83	296	168	163	23	171	95	577	598	1262	157	134	12	223	141	58	137	203	89
255	492	736	383	280	527	196	150	284	197	185	158	263	71	110	237	122	116	269	267	301	27	127	192	82	69	55	85	220	208	155	179	278	181	147	24	119	67	497	560	1079	195	80	115	142	43	54	284	289	200
256	396	851	385	295	672	128	258	305	160	203	215	197	243	175	176	50	173	385	257	263	189	220	188	57	166	67	121	228	259	163	155	333	171	247	79	147	69	537	584	1149	133	149	50	194	66	129	90	258	226
257	517	747	386	217	697	82	310	312	68	191	166	225	204	137	285	96	78	321	219	308	136	-10	140	67	10	179	45	258	303	45	151	320	186	73	81	35	155	424	465	1204	110	109	47	177	122	96	84	278	169
258	502	768	485	134	603	68	277	236	207	87	232	329	151	151	230	87	144	329	276	208	68	77	252	79	72	235	121	368	137	176	227	362	211	201	129	140	113	518	536	1274	197	96	-37	65	195	117	170	247	264
259	417	760	531	252	621	114	265	186	179	35	137	347	174	283	143	199	153	415	333	259	142	162	270	94	150	190	216	223	229	74	133	412	254	119	27	213	63	454	471	1129	176	141	-3	91	116	7	103	326	95
260	643	836	443	309	588	215	250	255	144	180	247	232	248	60	256	118	96	215	347	201	159	59	241	-29	91	142	125	157	160	209	140	401	170	135	62	100	101	525	574	1119	178	94	87	120	63	121	158	259	249
261	737	811	399	238	659	106	184	288	212	184	153	238	187	84	308	163	132	226	355	204	144	77	166	108	108	96	192	315	307	119	98	268	233	190	104	156	68	442	584	1129	146	177	23	273	99	174	38	145	189
262	495	635	492	139	561	148	319	222	235	140	137	260	78	205	210	140	99	329	284	227	126	60	98	104	106	70	161	311	244	231	185	258	231	163	18	94	132	420	502	1063	180	95	-6	183	112	103	139	172	142
263	506	746	487	362	697	146	209	277	142	230	129	278	181	110	222	112	184	234	302	283	113	36	126	93	153	161	121	256	113	52	187	309	190	166	66	213	154	503	371	1173	131	90	0	232	98	173	103	293	191
264	407	713	460	317	591	117	175	231	118	162	163	152	213	145	332	137	202	243	309	335	79	65	224	41	100	102	173	155	267	126	149	364	218	180	49	99	129	427	576	1095	237	124	54	219	68	194	52	237	251
265	536	647	522	54	782	70	326	228	202	257	235	276	159	191	325	158	161	399	233	286	105	118	151	-16	177	107	203	232	317	147	189	295	148	203	103	195	80	534	536	1220	218	189	68	135	10	160	195	216	243
266	593	739	538	248	657	184	317	242	188	159	213	301	226	148	307	60	176	220	271	155	63	-29	153	64	170	115	107	150	264	99	167	340	136	130	139	129	186	475	653	1005	211	116	14	196	78	141	173	196	155
267	465	772	502	251	687	148	278	212	122	169	183	230	186	240	310	83	182	318	364	333	36	106	226	-13	186	196	58	124	318	183	222	406	274	126	71	121	61	547	440	1156	210	87	86	200	53	136	186	281	165
268	393	862	303	192	596	69	327	249	110	114	150	260	157	92	244	109	186	307	339	189	107	80	272	38	151	63	156	238	288	141	154	311	183	142	152	124	39	462	482	1256	55	177	144	401	109	180	231	178	21
269	509	772	438	106	720	156	296	290	196	160	212	294	298	40	302	23	118	219	303	389	171	75	158	9	86	117	135	182	208	238	128	297	198	173	23	93	157	500	595	1081	154	151	72	90	39	160	107	298	144
270	575	827	460	226	635	112	256	191	55	151	139	288	110	142	272	83	185	321	286	228	120	114	159	10	74	64	44	239	203	161	255	299	100	131	39	93	65	466	576	1197	158	63	110	322	132	60	123	265	227
271	489	842	347	184	743	155	146	288	172	100	125	139	250	182	218	35	138	256	174	287	85	100	183	102	135	117	119	231	297	94	227	244	208	141	60	90	52	439	541	1299	137	163	27	174	81	75	18	114	182
272	497	884	526	262	711	103	307	239	110	218	140	233	163	150	153	89	187	284	287	231	130	168	214	41	87	129	115	259	244	147	106	169	76	120	71	162	70	452	650	1115	76	146	79	229	93	67	40	280	191
273	479	748	316	248	582	224	262	313	153	100	238	318	220	122	193	196	199	261	244	361	118	107	252	41	132	155	115	206	223	46	187	344	177	117	73	68	-15	517	475	998	231	198	67	239	63	178	101	363	72
274	559	692	576	277	588	173	355	300	103	163	275	254	123	109	178	110	34	248	272	215	123	48	163	25	179	146	64	157	189	208	175	386	266	211	149	135	170	518	577	1165	116	190	48	226	44	97	193	176	133
275	711	805	308	99	622	270	311	376	179	263	229	302	182	102	209	47	149	236	274	147	119	91	255	52	138	63	86	295	218	76	148	252	158	153	72	158	120	541	622	1065	55	88	39	297	25	186	134	167	9
276	496	792	450	299	758	154	192	269	117	163	96	323	196	142	250	125	214	262	281	337	194	105	154	128	31	113	85	234	173	222	185	301	225	187	101	123	134	373	637	1338	257	208	-37	198	145	46	210	294	119
277	634	857	412	238	679	93	307	231	208	164	186	266	133	191	197	103	93	347	277	311	152	100	142	73	179	98	141	228	236	160	168	427	189	72	130	169	55	480	563	1059	107	97	65	278	38	143	101	212	49
278	502	945	365	308	608	177	282	189	210	200	105	239	152	108	231	159	83	238	293	205	99	57	181	143	167	125	23	189	157	180	204	363	226	165	37	137	124	391	508	1076	137	74	94	196	61	57	126	273	137
279	568	818	285	222	721	237	235	190	197	103	122	347	160	123	316	153	121	232	295	357	155	96	140	120	112	135	147	209	169	246	137	388	159	267	101	83	77	510	512	1298	186	162	-7	231	96	234	143	313	117
280	621	840	355	85	571	96	226	322	131	162	149	306	196	140	255	94	145	216	291	252	111	86	202	109	100	139	101	256	252	201	133	249	138	150	44	190	26	515	585	1217	174	57	70	125	152	212	170	232	135
281	583	539	393	179	563	170	341	259	150	165	51	321	201	56	132	124	55	242	333	284	162	135	199	71	203	134	44	197	133	205	160	357	181	250	76	49	89	525	645	1207	172	114	-28	245	70	105	110	208	198
282	499	692	308	276	543	70	230	307	95	255	206	360	269	132	301	48	203	290	217	239	148	51	140	43	127	139	139	150	230	187	122	253	61	120	37	116	146	590	526	1187	212	108	-45	249	100	156	106	276	233
283	547	879	491	162	629	137	272	326	77	116	83	340	154	217	260	45	146	240	185	244	101	97	218	41	114	151	65	110	170	258	109	347	242	180	70	103	53	395	506	1310	172	84	47	159	95	270	202	184	100
284	523	690	297	302	687	67	309	226	162	233	210	237	144	234	234	131	130	285	269	249	145	152	224	30	103	110	104	134	132	251	40	309	240	179	108	113	39	484	529	1138	117	130	32	245	125	131	107	234	101
285	451	732	394	181	629	108	307	250	70	193	202	307	144	188	272	57	199	220	189	303	137	46	200	31	171	67	108	254	154	260	188	259	133	246	113	135	173	507	576	1292	192	293	-38	230	63	106	133	268	121
286	474	700	496	152	683	199	194	310	168	151	162	257	206	107	261	118	73	324	292	310	94	89	289	46	128	146	100	245	127	320	137	304	153	142	55	55	96	473	509	1180	51	139	93	247	98	91	130	235	196
287	511	856	408	382	612	106	332	280	201	126	201	183	213	211	268	152	146	230	214	189	152	79	158	44	39	89	204	112	227	215	174	434	238	174	146	92	108	348	557	1212	184	142	161	117	63	125	122	320	148
288	553	691	551	225	522	172	348	316	184	221	248	242	163	46	199	94	110	175	194	194	178	50	242	-6	131	129	132	199	220	221	253	343	174	189	93	112	68	386	483	1213	270	140	75	185	45	121	192	214	236
289	659	763	388	204	658	165	290	262	43	194	89	251	242	144	204	69	123	354	364	213	139	75	214	42	33	243	136	216	227	247	240	381	204	204	76	171	105	401	606	1211	181	68	-25	249	127	140	175	231	145
290	515	816	393	251	712	163	213	270	79	238	168	311	184	144	317	85	112	307	275	246	112	67	164	48	123	144	41	302	174	128	119	261	201	181	82	107	83	512	401	1303	152	197	-17	177	97	102	244	244	198
291	437	808	527	290	590	198	364	322	92	185	111	262	170	112	304	84	176	237	233	235	136	28	175	39	158	46	175	246	153	134	166	326	126	194	44	148	41	281	520	1298	165	81	35	258	103	201	223	132	146
292	460	798	315	160	609	127	373	309	185	129	183	365	181	137	229	122	87	242	324	238	79	47	163	81	140	194	121	202	234	145	72	300	257	198	134	108	77	524	512	1330	165	164	55	215	83	98	66	289	235
293	534	711	348	236	685	200	264	197	159	198	121	272	146	126	261	150	140	229	305	220	87	129	165	112	128	166	49	157	171	208	120	318	165	147	78	78	100	449	566	1257	186	89	-9	158	137	126	159	329	131
294	606	658	452	241	670	124	338	153	181	175	259	228	272	113	185	124	156	346	302	306	126	136	145	-28	127	125	136	67	243	192	194	213	189	142	150	81	77	613	478	1120	160	275	170	176	89	136	84	153	129
295	420	705	328	313	788	101	154	328	192	121	181	182	232	104	312	129	112	297	310	324	197	-35	231	77	112	143	112	227	227	213	92	336	128	242	41	168	21	443	513	1172	216	167	63	178	48	140	180	262	240
296	264	799	360	189	691	236	382	148	82	117	185	310	310	133	255	160	103	296	233	242	165	48	147	22	257	49	45	201	250	132	107	322	209	137	45	150	50	392	404	1201	126	141	86	120	83	30	167	287	97
297	598	941	528	256	709	154	385	308	195	220	328	155	147	116	233	179	172	228	254	282	125	54	354	78	90	118	187	126	157	190	208	390	64	154	59	173	68	342	568	1399	159	130	128	301	63	101	191	254	158
298	432	859	321	218	715	31	205	298	160	95	161	137	97	220	278	80	148	284	242	320	99	169	237	34	133	113	108	171	250	261	126	335	242	184	43	87	138	577	586	1085	88	203	34	188	145	164	117	287	263
299	525	772	299	318	562	168	289	303	180	235	210	339	132	137	217	162	152	260	189	262	178	53	209	16	208	161	102	286	190	227	183	298	199	168	74	119	68	562	593	1152	103	149	-7	213	105	160	154	152	185
300	463	648	377	256	611	153	336	309	135	313	235	224	170	151	236	53	13	337	69	344	189	89	214	11	195	135	125	139	117	256	198	333	254	97	102	94	121	352	659	1269	178	163	-9	104	73	209	77	262	187
301	535	705	347	230	569	89	337	280	98	169	197	274	178	93	209	76	147	357	233	294	93	103	165	69	131	93	107	172	84	99	130	302	212	142	139	78	97	488	522	1154	162	161	41	110	129	100	71	245	138
[truncated: 289 more columns]

## Sheet: All WT,unc18 to AWAChr
Figure 3D, 3S-1B
AIA::GCaMP5A F(A.U.)
Stimulus:	AWA::Chrimson
Genotype:	WT
Experimental Block:	1
N:	1	2	3	4	5	6	7	8	9	10	11	12	13	14	15	16	17	18	19	20	21	22	23	24	25	26	27	28	29	30	31	32	33	34	35	36	37	38	39	40	41	42	43	44	45	46	47	48	49
Frame (Pulse at 100)
1	464	707	414	693	566	156	363	272	197	79	175	200	119	238	279	195	173	113	248	216	117	142	156	11	131	128	27	328	214	54	176	307	348	218	75	78	160	355	533	785	128	87	185	156	54	175	224	197	154
2	459	757	558	567	836	142	264	250	140	161	173	84	168	186	193	34	213	164	316	319	49	143	164	33	93	88	195	247	159	96	191	226	359	175	88	98	187	527	499	875	211	111	49	165	171	184	146	289	147
3	481	597	510	429	787	133	225	241	275	157	185	240	236	82	299	75	183	220	243	246	41	187	248	28	152	84	111	260	262	102	143	344	165	139	70	105	164	460	635	783	196	169	31	113	91	159	163	269	205
4	665	672	331	485	796	192	431	239	131	156	179	111	200	174	225	128	92	151	257	264	120	41	156	95	95	88	118	360	227	70	234	252	248	245	2	81	132	373	591	826	138	196	68	218	140	80	205	223	150
5	489	713	546	548	734	175	359	244	147	256	139	196	191	175	265	85	99	148	254	259	164	77	217	59	126	111	77	301	183	126	119	232	214	191	25	169	152	448	500	779	139	217	133	258	62	216	97	192	183
6	610	722	457	631	686	122	268	179	163	174	180	244	62	114	254	104	89	90	240	173	211	150	266	76	185	115	35	224	208	90	100	383	255	196	49	114	128	378	537	884	194	219	2	250	91	161	168	227	252
7	460	660	402	470	814	153	219	202	201	198	202	209	151	91	216	176	52	117	220	145	46	42	177	30	60	133	74	244	133	141	127	354	220	182	40	172	143	524	537	863	149	64	104	141	25	43	104	250	206
8	492	712	447	534	855	112	288	249	154	139	216	142	204	127	264	108	133	212	305	219	141	101	154	93	120	69	131	347	315	125	203	247	241	204	60	83	196	440	612	907	190	179	62	268	96	110	158	273	347
9	537	845	469	704	724	157	286	260	211	66	121	81	282	98	271	191	116	248	275	279	72	97	227	64	203	185	206	405	229	115	135	284	275	215	101	163	78	535	534	695	185	110	30	165	60	67	87	229	109
10	452	853	415	598	948	238	305	266	208	207	70	162	156	215	178	120	94	117	188	163	109	125	191	-1	157	146	73	296	221	117	181	397	298	142	-9	118	61	584	478	804	180	154	-19	144	144	72	181	228	174
11	495	676	542	503	1011	145	317	350	209	111	169	158	224	178	300	110	249	185	241	263	88	145	153	62	133	209	117	361	251	113	152	409	267	255	95	115	39	456	580	804	88	177	90	223	48	109	76	326	156
12	464	751	449	599	884	199	291	248	139	169	197	212	166	77	301	111	54	208	334	322	120	49	127	66	173	172	68	226	239	167	223	386	178	330	102	92	41	338	542	877	176	86	118	219	77	154	174	97	116
13	524	610	314	599	996	115	270	244	35	68	220	131	206	192	363	132	111	198	271	241	87	29	176	53	164	112	123	330	159	50	133	283	192	230	80	218	109	495	477	923	138	92	64	99	-9	115	119	315	79
14	414	773	350	505	1125	95	278	266	114	32	156	149	153	172	222	169	166	122	231	161	125	31	117	63	73	104	215	282	227	156	156	213	336	157	26	71	51	448	564	766	193	109	-48	175	120	128	161	218	61
15	558	735	288	370	1101	105	315	285	149	122	268	183	137	149	266	154	168	213	380	196	130	35	181	37	165	119	182	372	184	271	164	323	146	207	66	86	116	420	507	889	230	138	65	114	26	174	111	350	148
16	483	763	325	570	1116	145	363	274	238	52	223	256	178	174	345	143	185	159	264	251	97	110	124	43	111	63	140	216	166	134	152	243	211	270	36	114	-50	536	566	823	243	140	122	172	197	95	108	164	130
17	504	616	451	595	1110	97	316	282	185	167	238	276	283	259	297	76	142	178	268	211	86	65	132	16	150	226	129	214	176	93	151	364	178	125	147	110	65	412	524	745	154	104	47	134	116	183	130	157	262
18	438	771	533	639	1001	190	303	235	134	152	149	203	170	178	207	158	166	168	383	259	149	-10	69	124	108	210	-8	318	273	95	172	283	187	181	77	92	28	636	607	743	169	157	-76	224	66	125	82	341	150
19	367	743	329	487	1078	95	330	282	274	48	249	149	186	90	236	146	130	144	228	236	94	101	174	58	116	132	91	310	291	133	215	251	233	135	-11	117	101	378	506	786	194	151	70	152	112	101	162	160	283
20	521	642	441	452	968	219	296	242	136	52	240	159	248	205	278	122	121	195	242	336	70	45	164	95	69	121	96	246	253	171	51	413	193	200	83	79	98	389	599	739	197	119	55	164	124	187	107	305	124
21	557	576	485	571	949	157	279	272	209	76	194	221	164	90	223	100	66	128	292	199	40	62	130	122	140	115	120	288	232	226	109	353	216	201	9	117	18	344	663	799	119	149	40	158	42	88	175	188	207
22	453	581	514	550	1066	62	310	254	168	173	150	217	99	249	262	85	145	139	240	215	120	79	188	65	151	144	-3	296	228	141	68	327	214	161	69	105	71	459	610	775	137	133	22	216	66	214	141	262	-4
23	413	680	401	503	924	184	346	270	194	109	199	231	174	183	163	95	196	187	273	209	82	70	224	53	152	185	75	241	264	177	236	405	267	251	115	122	118	389	442	758	193	228	93	184	170	202	154	233	230
24	463	578	335	630	1129	134	346	222	127	115	144	172	129	225	229	66	137	152	300	295	96	145	224	123	105	111	88	336	234	82	204	330	291	226	54	87	91	286	610	886	145	168	83	198	40	131	134	148	133
25	428	723	550	461	1058	148	253	299	253	268	178	254	207	128	235	116	45	59	194	296	99	106	214	55	143	111	100	276	201	175	121	354	187	265	103	176	109	377	706	819	168	227	83	175	81	155	116	243	94
26	671	573	512	578	975	199	275	238	136	25	229	96	210	209	224	78	79	163	348	217	126	130	294	90	137	235	167	313	68	182	179	338	247	125	44	148	26	388	615	644	154	54	73	190	54	68	56	161	176
27	491	699	538	541	922	225	312	290	88	125	192	192	198	135	211	81	170	204	276	214	49	23	224	131	59	103	147	287	223	143	110	250	235	177	76	62	33	455	458	710	270	204	49	215	122	81	176	215	176
28	541	703	306	458	1016	87	316	247	167	171	174	209	148	158	225	167	169	153	313	240	62	109	316	75	74	176	32	307	150	2	227	346	163	234	45	121	64	556	536	817	197	146	190	171	-5	123	103	201	174
29	507	770	430	545	1070	117	311	371	135	145	237	209	224	155	298	146	168	203	269	119	136	75	224	101	46	136	41	235	207	154	228	423	227	156	104	190	-42	379	453	724	48	108	45	286	91	60	174	215	153
30	504	633	464	602	1123	91	251	223	192	128	166	263	199	131	122	94	88	197	278	261	130	37	124	58	144	117	50	273	195	183	89	225	203	179	55	85	84	441	611	820	175	177	47	154	138	75	141	262	110
31	551	656	348	656	1080	111	397	230	90	100	166	167	164	170	305	96	136	150	270	265	88	14	219	38	151	141	171	194	262	161	129	284	204	184	29	120	36	426	464	804	160	170	168	132	127	130	166	268	167
32	591	886	469	583	1200	152	303	179	249	61	212	161	195	141	175	186	124	197	233	388	121	188	280	80	106	127	184	245	295	168	167	435	246	249	91	192	117	381	485	808	211	150	18	166	68	52	145	253	221
33	659	681	371	651	923	135	274	250	92	126	193	355	243	119	265	37	197	233	351	289	170	117	280	20	52	142	105	206	215	59	123	325	231	244	60	72	18	478	455	729	126	125	-17	223	113	54	191	308	182
34	480	589	357	604	1127	98	329	214	100	134	98	270	152	241	270	132	181	184	319	265	149	47	191	115	126	124	84	291	229	133	184	158	252	238	46	111	33	460	604	853	117	114	93	178	54	106	160	146	66
35	569	723	543	512	1051	175	328	199	145	146	168	201	149	136	211	54	80	313	377	288	101	7	159	96	92	188	112	195	180	147	117	321	241	155	22	113	74	482	666	781	174	87	54	160	57	149	96	235	157
36	699	742	521	594	1140	129	286	253	148	125	85	128	218	147	236	101	56	110	272	241	202	71	108	65	120	166	101	260	254	166	127	238	133	184	85	166	127	568	618	806	229	148	39	279	92	178	198	170	77
37	671	705	428	561	1176	123	365	203	190	225	124	213	214	167	212	145	137	265	336	252	181	120	202	60	63	187	249	315	323	90	141	310	271	199	17	143	28	392	418	961	275	177	141	325	92	144	203	266	11
38	600	877	445	496	914	151	298	96	175	137	205	144	140	263	184	50	174	190	213	241	74	98	217	115	48	156	120	267	151	97	150	241	225	189	116	105	25	412	517	884	179	162	11	128	103	92	103	332	105
39	633	706	457	316	1060	167	291	181	214	124	182	165	110	140	283	128	108	207	281	232	158	52	157	117	112	80	63	234	287	155	202	318	377	203	48	104	51	492	517	634	183	183	139	257	104	132	71	148	67
40	585	775	429	389	894	185	418	237	212	102	210	325	152	121	213	101	130	221	383	210	149	128	260	129	101	110	101	245	240	146	93	290	381	232	60	147	119	495	665	818	140	141	13	221	163	130	145	132	165
41	602	761	503	413	1057	189	242	180	157	156	284	181	154	80	229	109	82	262	248	246	95	57	206	114	27	147	75	254	245	94	99	299	291	254	24	64	74	465	590	827	89	189	-4	218	100	124	25	202	149
42	566	650	493	244	1061	175	362	307	164	135	169	132	193	104	277	169	165	98	190	213	133	83	219	77	82	127	153	215	260	197	109	377	288	212	36	97	106	417	553	791	115	183	73	87	91	234	57	143	231
43	524	745	454	424	973	169	265	277	98	106	204	214	241	175	273	140	152	272	287	288	118	25	262	94	134	144	234	394	229	106	214	333	226	208	73	179	85	386	593	669	120	165	48	242	31	56	72	217	114
44	681	815	540	364	1078	134	273	180	270	161	226	134	229	74	187	199	135	191	337	134	141	164	169	111	124	150	126	284	215	163	89	374	264	228	44	6	37	375	529	848	168	123	99	176	91	231	66	224	181
45	603	648	498	508	958	192	376	257	231	161	164	213	126	107	154	42	168	214	237	216	160	63	252	98	120	116	153	219	158	103	168	261	269	258	31	54	77	333	420	708	147	171	-23	306	42	158	142	222	212
46	574	697	549	321	1077	84	362	251	189	122	159	186	187	146	335	159	136	237	219	242	128	116	196	3	134	170	56	308	177	70	92	250	341	198	-20	110	105	453	546	697	164	121	18	124	89	154	76	186	122
47	468	645	407	484	1035	158	262	329	167	194	111	267	178	116	244	105	161	198	260	259	107	132	126	33	111	179	42	227	248	131	136	324	185	149	53	66	39	372	585	1091	146	160	-35	209	45	79	113	217	203
48	628	704	383	600	1042	161	340	185	171	100	337	97	189	142	191	106	163	231	283	211	171	4	254	70	135	44	193	186	105	172	151	320	314	200	49	37	105	358	455	742	173	125	43	181	61	156	133	214	241
49	666	745	422	241	1071	148	239	211	200	86	369	125	187	124	201	36	95	151	206	300	113	154	109	61	90	122	160	264	243	115	83	330	261	236	64	100	95	530	490	697	172	200	86	426	60	62	138	165	226
50	565	745	363	152	1142	167	303	227	151	152	194	223	180	118	234	139	135	154	193	199	149	94	244	42	183	241	98	182	189	164	67	336	288	192	152	153	45	474	528	722	173	198	79	352	110	98	56	252	167
51	741	796	467	181	1032	120	310	163	115	134	113	135	151	115	261	90	105	130	264	261	154	172	187	98	152	84	25	244	234	120	130	305	238	254	26	96	43	429	500	867	207	189	98	314	92	83	135	280	167
52	636	571	411	153	1116	235	434	305	161	128	136	193	197	157	286	185	100	256	293	264	59	46	172	83	136	75	122	273	179	114	239	360	343	256	11	95	104	360	588	662	171	126	-9	383	103	180	153	196	190
53	487	812	588	141	880	200	383	292	73	97	194	188	283	91	105	144	91	218	336	151	137	131	214	18	121	89	173	234	234	127	183	298	323	237	-9	114	89	582	547	839	148	137	21	302	51	60	148	206	160
54	636	819	484	313	1104	205	274	228	56	185	121	170	203	213	227	107	141	188	277	287	109	127	263	20	121	94	88	196	218	102	123	339	236	169	44	169	45	482	603	840	222	219	62	360	-17	105	143	159	239
55	561	786	315	80	1026	169	357	222	184	203	135	185	194	278	212	98	88	139	230	144	73	49	102	72	37	115	153	280	194	101	224	249	238	174	46	100	123	463	489	726	155	98	-33	557	21	227	105	205	152
56	490	753	379	155	950	164	293	283	136	95	192	171	232	124	276	144	109	286	296	332	119	87	167	87	135	210	226	196	87	124	82	242	261	166	73	68	71	511	556	791	127	176	-84	439	77	77	80	112	98
57	773	727	583	260	1028	227	325	239	214	175	154	223	212	114	265	77	182	168	405	251	96	49	150	22	61	178	78	121	164	79	135	244	293	206	38	139	50	442	650	774	153	202	54	559	90	52	216	140	114
58	589	632	469	166	1114	164	230	180	216	195	142	186	161	175	317	17	234	191	260	326	91	125	194	98	39	204	39	262	144	101	175	284	360	145	165	81	85	395	454	781	114	137	6	333	76	197	86	230	157
59	615	746	449	67	1047	156	352	281	215	232	158	231	312	104	190	15	147	239	246	224	96	99	181	99	120	126	46	238	182	155	91	314	248	180	45	42	92	428	482	776	211	262	112	406	55	123	186	195	174
60	559	749	477	87	1117	117	387	239	166	155	255	231	207	114	239	117	183	110	263	266	129	49	281	78	134	88	98	322	136	201	198	279	214	225	13	96	28	372	549	781	201	214	135	292	191	177	247	247	124
61	579	669	462	263	1129	152	281	246	132	187	171	124	149	32	156	112	165	289	292	256	175	103	209	108	112	204	47	182	123	34	142	328	255	173	-12	125	53	471	485	811	108	165	57	245	102	171	197	140	108
62	683	724	474	62	1143	181	304	195	205	87	132	257	255	126	264	83	140	129	220	183	129	99	110	-3	162	95	109	258	157	84	188	282	232	221	52	180	26	524	493	639	189	163	75	439	125	124	90	182	41
63	622	880	438	146	988	86	321	313	132	126	202	193	136	191	248	262	172	161	340	323	170	47	217	15	71	156	179	286	210	158	159	358	235	143	46	148	36	503	552	834	73	118	90	304	90	65	81	167	214
64	458	838	442	110	1114	215	308	206	107	191	152	176	134	208	183	73	121	236	273	194	102	112	136	47	56	105	135	243	158	186	161	401	162	218	29	63	35	437	485	717	217	158	73	363	56	147	73	95	130
65	789	710	500	150	1163	108	337	210	229	185	93	159	280	126	131	1	145	251	216	218	192	33	200	22	130	131	132	258	115	94	156	239	265	185	107	173	72	397	401	817	171	84	53	261	26	212	162	54	202
66	597	903	316	258	1010	178	243	117	92	80	80	219	210	115	202	22	142	201	300	303	114	92	186	75	82	145	13	320	217	120	133	364	174	161	58	155	10	568	663	822	146	201	109	412	81	195	124	254	189
67	635	629	475	203	1053	117	199	175	235	113	166	234	255	177	202	109	72	146	228	57	117	35	149	92	130	170	12	188	204	115	147	305	235	213	78	90	120	477	545	711	102	171	23	326	130	116	182	143	154
68	848	610	459	-21	907	112	276	185	145	167	227	185	178	180	205	54	194	155	237	264	78	80	198	26	58	184	100	229	202	213	199	301	258	247	78	180	53	555	572	736	188	167	-20	315	115	-12	214	278	217
69	693	738	430	224	1001	150	206	294	93	108	248	91	97	150	139	74	178	230	351	245	199	28	166	33	178	152	259	221	65	173	91	298	171	140	150	45	21	511	557	754	171	138	144	372	46	108	144	60	164
70	594	580	438	98	931	202	315	248	256	170	199	123	239	128	165	74	155	170	301	183	82	91	168	126	78	203	72	195	161	125	112	276	232	194	132	92	161	490	694	775	172	153	18	402	58	139	143	334	118
71	428	850	347	238	892	97	286	231	184	107	201	116	201	142	231	93	179	181	329	339	171	75	232	53	78	108	155	179	193	220	131	269	259	210	2	122	39	432	688	837	254	145	30	277	-10	144	92	323	135
72	318	664	538	142	994	125	248	169	64	207	201	239	176	186	152	105	195	265	295	258	207	128	214	171	198	154	117	178	212	114	178	281	259	166	11	70	58	409	587	719	164	222	47	300	123	168	55	137	123
73	594	779	450	42	1003	190	294	196	79	58	83	266	185	74	123	88	88	251	256	273	222	21	237	87	47	154	143	208	152	116	111	353	152	159	89	124	61	401	628	624	155	100	136	309	22	161	171	261	66
74	510	744	563	302	968	134	317	180	145	83	171	196	187	171	245	151	74	218	222	239	163	33	136	107	136	129	127	305	163	113	111	265	210	205	132	86	105	324	681	733	174	97	75	366	95	109	119	317	174
75	638	619	530	316	907	113	320	198	186	179	169	161	172	131	197	156	130	88	367	317	85	74	139	50	172	149	127	345	235	124	133	271	242	262	37	124	106	422	716	773	179	144	79	333	10	211	174	206	124
76	381	823	344	211	1014	121	345	291	177	218	166	176	159	75	198	93	182	106	305	258	174	121	175	116	31	128	212	254	176	85	157	378	217	230	114	105	77	545	672	707	147	119	96	165	144	294	153	191	181
77	558	706	404	246	1017	104	440	217	147	52	193	146	194	200	229	106	91	195	264	251	183	160	159	110	118	154	73	185	243	152	160	391	227	269	88	115	7	370	606	708	148	76	60	254	107	172	160	206	106
78	626	636	481	334	1094	95	282	280	101	111	110	136	145	144	224	70	98	136	162	274	104	122	248	44	114	149	117	282	223	162	76	351	219	255	180	123	119	326	654	577	175	103	96	274	103	263	143	170	265
79	675	858	468	344	1136	137	272	241	170	111	156	163	197	166	214	135	117	175	213	197	60	124	158	17	202	195	151	260	159	163	158	348	217	249	82	157	100	491	633	707	144	26	52	349	123	178	130	115	192
80	627	760	515	204	1068	145	373	249	183	304	164	215	254	185	273	157	39	131	215	283	186	115	193	135	168	194	52	266	219	178	180	240	230	206	75	155	46	416	611	877	54	94	117	290	133	153	125	184	166
81	591	497	536	251	1038	247	248	274	165	105	232	166	149	116	189	47	175	140	295	136	161	103	284	140	119	120	152	211	224	123	110	260	283	218	48	96	19	439	601	739	204	108	-8	227	96	191	119	184	177
82	524	706	556	379	932	249	324	252	193	172	214	140	174	163	160	210	153	108	167	308	61	52	158	57	70	86	118	267	205	53	177	234	240	222	96	111	69	536	528	792	154	96	66	312	162	186	98	286	76
83	448	782	357	323	1108	129	337	216	156	99	97	173	152	138	215	23	135	102	322	278	93	55	219	64	63	94	131	193	198	206	53	333	182	198	68	85	66	405	616	757	292	156	14	265	219	133	89	177	239
84	633	778	434	221	909	261	227	313	275	182	140	146	210	98	183	96	195	200	201	226	26	123	202	102	37	86	-17	231	186	203	110	267	176	211	59	83	124	352	444	848	104	157	-16	228	195	223	136	162	87
85	554	789	624	145	1117	133	295	238	122	131	236	155	193	98	180	84	148	248	204	178	117	77	169	178	94	167	139	273	223	134	48	382	200	155	57	187	114	642	699	925	180	163	0	219	256	149	152	204	112
86	570	853	416	400	910	133	280	205	109	76	247	160	166	143	160	91	163	139	245	261	96	86	121	37	88	164	54	342	255	92	95	319	152	303	55	123	44	357	606	897	161	166	57	293	201	84	122	247	203
87	504	923	544	315	965	211	202	230	199	186	202	140	84	148	248	153	182	150	263	216	165	62	220	73	68	125	66	269	162	195	133	279	163	144	58	75	117	512	797	839	230	177	46	322	305	280	219	217	264
88	485	774	422	292	817	256	303	168	162	119	204	228	239	137	248	48	86	175	277	245	235	87	245	51	104	146	53	118	243	203	170	283	198	131	77	141	129	453	615	948	151	140	16	290	219	149	134	171	163
89	545	676	453	328	785	17	332	225	148	114	172	146	169	217	212	62	122	104	183	189	241	71	297	70	95	169	106	229	196	74	115	328	273	206	58	163	21	497	592	794	190	106	1	241	193	108	112	177	153
90	598	657	463	251	844	173	249	183	168	197	164	163	159	112	150	63	125	185	308	254	75	114	292	98	121	126	124	234	149	76	192	271	234	201	77	197	96	488	509	773	170	101	120	148	183	101	82	200	229
91	375	688	317	371	913	222	297	206	167	130	81	171	207	174	257	104	159	90	239	241	112	96	159	81	110	184	119	207	164	80	111	211	130	96	79	170	80	574	761	691	183	123	111	223	125	104	46	193	165
92	443	717	491	210	880	185	376	280	144	164	190	171	249	135	259	109	234	217	241	215	130	117	145	42	92	119	107	166	127	84	100	344	202	218	52	152	117	575	702	769	168	177	18	185	231	162	104	251	180
93	519	806	367	335	946	131	249	267	226	213	130	264	252	242	137	96	75	190	142	168	205	24	166	-40	100	116	165	268	252	134	89	385	154	186	53	67	74	451	632	843	166	119	56	350	229	130	128	168	193
94	625	830	399	233	647	222	292	284	124	132	95	132	149	68	214	45	107	217	279	257	135	112	219	162	114	174	-8	302	234	148	211	189	183	218	83	49	69	267	687	808	165	57	28	211	296	117	136	53	251
95	565	754	561	328	765	170	217	202	228	159	378	148	159	209	100	144	74	187	290	189	105	86	196	91	76	160	186	183	165	100	123	304	191	211	46	49	135	353	568	707	162	123	96	153	184	156	113	279	105
96	582	566	447	362	901	105	176	232	171	156	282	200	174	148	233	119	127	206	247	215	29	91	152	57	85	102	177	364	194	221	164	325	108	174	129	115	116	473	605	744	181	110	6	334	194	133	186	177	177
97	569	747	368	384	859	102	315	333	173	221	162	238	161	82	172	176	37	177	358	281	190	158	177	64	207	56	45	297	97	88	200	360	196	246	-35	133	136	514	591	849	327	126	73	349	205	124	161	254	168
98	473	798	520	310	703	165	255	277	187	220	238	184	205	81	164	126	297	216	304	303	182	24	242	131	77	175	19	200	156	107	129	276	188	228	50	126	106	512	719	728	148	65	83	269	211	170	109	61	33
99	434	619	586	342	845	85	228	263	153	142	190	263	158	224	252	161	98	157	222	246	182	81	202	135	134	68	89	269	202	119	184	287	191	134	131	117	76	464	679	896	272	147	138	208	168	171	154	94	169
100	537	707	372	340	687	224	217	306	154	155	233	208	229	193	284	132	176	224	227	356	145	57	185	-39	115	78	191	267	232	81	53	334	146	231	127	108	58	464	557	758	130	152	-6	262	148	206	193	164	119
101	335	731	424	617	742	226	217	179	161	154	221	85	176	167	106	223	113	146	204	212	166	119	158	83	104	91	140	226	140	246	138	266	245	228	63	73	101	458	687	818	172	220	63	160	94	173	45	113	123
102	593	718	518	494	564	62	277	135	194	130	192	196	216	101	241	44	193	206	270	164	127	127	161	79	112	56	111	285	180	92	193	398	205	318	132	54	95	498	688	729	151	183	29	236	239	105	53	281	332
103	527	570	317	332	768	148	343	233	172	194	138	232	171	153	177	176	124	268	229	226	98	128	182	-16	155	170	83	292	184	195	171	338	212	219	25	45	110	356	606	796	89	137	28	184	230	107	160	192	140
104	471	682	395	470	803	174	289	283	113	109	122	153	195	141	300	222	138	265	277	332	48	89	235	69	161	132	195	249	137	172	126	335	214	250	-13	148	95	395	566	851	232	148	14	163	86	167	227	263	178
105	523	625	522	577	737	99	219	253	191	69	206	212	144	100	155	142	172	173	209	188	130	55	184	-37	143	113	90	207	170	136	186	261	115	173	140	49	17	470	725	855	218	121	103	262	239	223	109	175	155
106	474	754	391	381	708	143	314	228	122	87	161	324	166	123	213	149	195	190	276	217	85	100	174	101	213	116	135	312	130	178	220	266	171	198	109	169	39	508	591	907	141	168	50	191	175	127	193	205	64
107	466	761	334	459	667	196	351	272	193	122	136	249	218	118	164	127	214	245	342	199	154	68	242	79	89	119	105	228	173	168	181	298	100	220	73	121	102	418	605	814	150	205	13	147	187	77	167	180	95
108	468	700	447	417	901	108	311	251	149	159	196	198	169	212	195	180	76	226	347	197	109	50	169	130	133	161	131	243	120	109	144	328	234	230	130	74	98	399	525	825	130	270	101	315	214	209	176	276	303
109	522	843	459	461	854	51	299	215	159	234	208	179	200	165	235	123	154	201	298	315	113	114	216	60	143	149	161	243	140	161	101	315	205	174	71	87	45	409	604	868	93	131	56	166	283	193	141	174	105
110	551	646	437	206	738	199	330	237	110	229	182	202	148	149	333	257	165	239	307	238	92	0	167	90	119	161	92	194	186	165	86	296	228	245	105	236	26	501	696	933	142	99	58	193	122	188	89	99	289
111	693	792	497	306	902	116	371	242	114	173	274	189	204	100	277	265	232	273	305	319	158	78	210	119	71	152	165	247	81	141	195	294	165	198	101	161	-21	460	703	800	165	195	78	235	228	217	107	122	58
112	574	617	491	351	1006	125	198	298	170	151	263	251	219	115	542	255	303	268	253	319	118	36	141	26	123	132	87	251	192	144	130	393	205	200	107	94	108	479	582	1147	187	151	33	257	93	211	149	180	181
113	546	779	526	250	869	155	303	250	131	230	266	271	303	228	500	310	163	353	258	333	95	153	272	131	87	163	108	238	125	215	138	329	172	206	184	99	148	340	765	1137	155	153	63	188	177	179	115	80	75
114	447	651	437	258	954	173	218	338	181	113	136	219	334	184	486	228	211	310	380	332	263	52	224	204	89	91	87	255	125	225	110	225	209	250	48	126	58	393	554	1249	194	74	68	286	144	139	179	161	145
115	649	629	568	192	911	192	257	275	138	186	110	146	472	270	462	258	249	257	226	385	168	33	195	167	236	155	102	236	195	178	126	348	131	268	79	202	91	445	628	1235	110	137	46	127	145	203	120	117	189
116	601	797	389	234	828	141	316	343	97	159	176	170	511	160	474	326	275	274	218	367	165	40	215	166	210	89	152	54	209	231	216	343	190	199	211	93	71	462	779	1337	163	122	134	274	194	329	202	219	106
117	535	859	553	150	799	141	294	224	262	251	258	214	341	217	532	248	261	320	357	393	192	129	207	155	137	165	197	193	165	255	187	366	268	325	168	152	28	257	597	1101	193	168	91	223	56	195	180	202	168
118	785	815	409	300	825	182	291	132	359	233	254	157	343	123	493	215	232	244	355	265	273	112	285	197	106	154	124	183	165	273	208	346	191	323	205	134	162	486	677	1283	81	144	121	63	96	134	132	207	249
119	713	696	422	48	800	106	352	290	318	175	170	232	447	161	596	240	209	274	238	360	167	146	141	153	129	181	125	208	244	242	100	380	140	290	165	169	7	494	757	1258	154	132	58	270	30	261	128	219	171
120	710	740	402	221	784	105	402	243	359	122	122	242	522	77	448	256	213	292	304	340	100	113	216	126	164	143	134	174	307	137	126	319	201	302	185	89	26	525	729	1357	162	159	125	251	86	113	72	223	164
121	678	580	499	227	899	311	251	220	363	191	110	176	485	325	409	269	263	356	300	281	164	40	156	165	33	281	104	238	274	300	163	380	120	366	124	187	39	373	732	1162	210	181	77	169	8	204	98	151	339
122	687	707	500	93	879	199	244	233	302	343	172	190	398	160	406	224	204	344	372	338	186	127	232	167	161	143	174	284	206	281	140	493	189	289	196	142	74	501	643	1046	261	115	-4	149	172	218	33	157	333
123	737	786	458	8	883	94	328	210	498	311	201	252	519	187	364	209	243	361	329	358	129	102	216	168	118	118	2	123	178	275	184	351	146	401	169	134	26	564	625	1149	137	127	89	149	156	174	134	205	252
124	874	689	507	-150	853	235	400	258	439	302	127	302	519	209	410	198	293	253	245	292	163	52	140	69	69	137	145	139	193	154	206	404	240	326	211	153	-4	316	556	1076	141	240	100	139	182	196	108	89	385
125	808	966	380	-116	863	154	295	250	306	233	257	248	512	282	463	191	219	287	300	310	96	32	219	168	140	110	154	190	216	127	198	327	212	311	100	131	-5	507	680	1312	251	144	48	133	69	181	244	208	281
126	779	674	346	-127	839	142	258	378	349	242	112	243	382	146	425	208	232	220	294	276	192	113	173	55	182	119	143	179	237	293	165	397	164	329	77	136	93	520	632	1253	232	132	-7	182	77	400	251	259	262
127	811	862	430	-113	939	178	275	199	415	296	250	214	456	197	401	226	345	237	256	301	119	126	197	124	56	209	168	145	84	218	134	419	90	306	170	195	128	486	621	1212	229	184	61	199	143	275	110	228	246
128	687	717	436	-109	662	153	259	205	424	319	215	228	431	257	455	226	264	173	232	409	161	59	257	143	110	147	75	231	216	158	147	406	156	331	102	121	13	520	466	992	132	222	-57	193	17	346	200	290	312
129	841	780	534	40	668	98	244	238	438	282	270	247	380	132	379	145	203	188	275	372	175	67	172	279	105	128	74	276	215	281	189	331	176	241	150	94	80	537	692	1285	181	199	39	216	125	430	221	244	404
130	836	801	544	-35	745	114	330	383	384	173	220	201	472	149	380	181	254	285	291	407	110	83	168	203	140	176	137	125	179	205	185	479	139	382	146	168	130	527	640	1105	166	179	32	248	154	421	148	214	307
131	669	803	317	-121	753	136	346	279	339	280	212	240	529	205	342	228	273	264	282	317	126	71	267	232	114	207	144	194	179	192	195	387	252	380	290	126	130	451	538	1087	109	134	58	224	120	403	196	168	408
132	792	828	450	-223	790	51	241	292	277	247	240	271	553	127	413	240	204	216	331	408	142	54	94	114	121	85	171	157	237	139	237	484	273	347	124	143	144	631	619	1155	116	124	79	219	164	395	166	210	298
133	324	660	516	-129	767	68	373	351	304	245	179	227	502	102	367	187	249	195	375	316	183	102	204	166	98	103	211	229	187	273	93	573	293	258	209	163	88	612	600	1118	183	68	8	202	77	337	172	117	217
134	701	785	480	-74	773	68	361	423	304	261	160	259	420	126	328	175	245	195	316	351	120	142	190	200	93	116	83	269	290	180	95	299	247	368	157	172	99	466	622	1049	129	189	21	149	77	350	89	252	308
135	914	807	446	-27	790	100	432	375	385	344	141	225	374	181	290	177	342	253	245	356	230	68	158	107	97	275	126	208	130	254	145	487	339	322	188	150	137	361	548	1151	181	202	60	122	82	341	265	140	329
136	740	981	509	-44	766	145	525	254	347	229	194	217	349	175	259	211	300	139	298	250	105	65	195	125	158	129	79	285	205	214	140	526	302	304	99	213	32	503	581	1257	151	196	66	161	122	398	152	246	338
137	758	820	383	24	625	224	552	340	320	270	205	226	418	196	290	127	359	233	223	321	167	68	191	184	116	182	116	219	219	273	129	413	279	279	126	150	106	465	548	1226	161	127	77	193	56	352	168	185	343
138	820	841	524	-98	655	223	423	203	269	207	244	275	395	223	331	204	283	323	240	259	107	39	241	68	125	307	163	217	156	297	119	427	234	300	164	189	58	507	660	1303	253	167	24	175	-20	278	192	95	319
139	688	864	496	-143	621	78	687	321	364	205	299	338	358	129	307	148	288	137	342	413	134	42	254	144	98	271	115	235	237	209	124	369	284	283	189	178	142	339	655	1371	214	257	71	303	71	329	182	286	252
140	784	840	371	-67	652	86	573	289	301	232	246	205	442	204	302	123	261	164	227	339	211	86	272	146	164	276	80	190	150	215	107	461	366	255	186	124	47	647	736	1287	161	118	16	137	57	343	273	153	303
141	942	857	424	-54	764	140	532	219	238	250	145	329	453	152	306	147	306	223	283	380	107	70	199	95	125	249	73	177	188	222	102	524	357	272	237	137	61	417	688	1288	251	175	8	155	145	364	125	232	266
142	709	985	539	-126	491	90	447	210	243	279	168	211	495	227	342	195	293	222	301	240	196	76	269	112	77	266	150	218	179	150	173	390	302	259	165	152	90	433	994	1399	231	98	119	268	70	360	204	171	333
143	717	828	440	-23	588	123	456	275	265	171	168	130	586	203	289	234	309	242	293	374	204	114	238	179	128	353	135	221	183	188	164	340	323	399	209	111	129	490	615	1389	103	189	64	216	184	318	148	188	384
144	669	699	464	-87	689	188	594	240	276	171	238	201	402	132	202	218	305	192	299	377	140	72	168	43	171	284	68	207	135	139	201	425	288	263	134	131	62	544	768	1401	269	149	138	189	117	398	154	314	412
145	773	632	545	224	570	69	495	252	329	184	127	258	422	102	325	142	363	298	346	297	292	106	202	218	96	337	176	194	211	136	128	515	268	244	137	168	72	454	689	1551	309	114	-66	161	153	263	115	151	314
146	680	782	426	403	486	113	306	242	233	259	208	211	488	101	239	90	281	334	291	328	226	85	285	134	82	278	96	122	277	201	151	508	275	227	157	71	168	442	613	1298	272	103	96	75	-14	345	224	177	275
147	643	738	505	386	587	140	412	285	419	288	276	265	490	132	349	159	356	296	314	445	215	107	275	255	142	251	86	331	222	193	153	526	309	309	200	172	108	432	724	1430	219	222	99	210	100	357	108	167	347
148	763	705	370	458	628	168	421	291	180	158	255	198	368	139	315	175	339	386	290	291	127	50	235	243	140	329	116	217	219	291	155	405	225	333	167	96	123	497	652	1264	343	121	68	263	143	221	201	161	366
149	675	820	235	428	498	173	636	337	246	132	97	158	362	158	268	133	384	379	341	382	222	144	297	179	101	244	160	226	182	177	137	492	295	292	115	184	50	488	459	1285	261	150	56	134	136	389	176	193	492
150	665	833	431	479	613	134	416	198	309	288	174	304	382	195	435	98	390	356	270	433	118	75	288	83	70	229	72	193	229	215	126	457	142	277	149	126	59	459	501	1307	335	162	63	189	80	283	268	147	342
151	714	732	469	335	511	220	433	243	210	203	294	237	433	190	224	183	328	329	205	484	247	143	152	82	191	281	165	315	125	215	215	448	213	246	153	100	139	560	832	1587	369	220	123	328	47	214	205	175	404
152	776	675	443	270	524	114	445	271	303	310	231	161	429	205	267	156	350	365	389	408	209	94	220	107	116	254	179	220	221	135	135	449	292	218	150	115	111	532	751	1343	256	162	119	177	98	224	168	182	372
153	737	660	323	390	527	161	445	309	231	102	176	258	415	199	330	211	413	362	281	295	145	145	154	168	144	330	158	176	123	277	165	487	333	183	154	102	159	568	637	1354	289	358	38	196	162	253	148	231	312
154	881	578	450	390	597	99	375	300	275	349	111	272	380	122	236	21	460	343	382	401	153	165	249	124	123	248	117	309	151	225	177	399	178	240	159	186	150	643	684	1308	248	274	142	199	161	262	140	237	293
155	738	660	426	478	654	360	496	323	383	182	234	177	346	223	246	146	332	405	251	514	267	50	227	169	108	313	110	280	249	178	118	437	350	259	152	4	95	501	774	1544	256	191	54	209	39	309	201	252	333
156	793	725	497	297	483	80	457	402	279	238	225	280	322	154	191	154	274	335	256	622	143	120	253	78	129	256	124	276	201	141	142	452	189	234	117	110	66	433	728	1179	253	287	-20	131	57	242	282	208	301
157	694	728	296	404	710	150	334	380	316	214	182	221	291	123	247	160	277	569	168	549	145	-16	290	98	66	233	200	179	275	205	134	452	312	239	174	178	119	409	689	1520	338	211	120	192	66	205	165	168	229
158	695	862	316	377	509	200	325	405	195	173	273	283	320	115	225	223	341	365	308	584	127	102	210	32	148	340	238	264	214	159	228	428	191	280	134	183	56	334	647	1425	177	147	64	143	-14	229	134	225	293
159	866	845	539	495	587	137	502	364	400	165	219	230	278	210	297	298	331	397	334	598	166	81	226	206	68	113	267	209	222	324	100	457	210	278	159	149	36	500	690	1305	245	192	94	174	83	257	149	319	253
160	718	698	328	361	584	150	513	304	427	228	92	197	344	37	276	227	306	399	272	496	209	48	169	117	191	284	195	107	155	243	109	507	205	295	203	97	193	483	554	1217	240	218	52	108	-1	307	163	124	289
161	701	784	541	285	605	172	356	365	350	237	156	203	318	157	229	193	339	283	336	573	206	76	211	135	88	162	225	216	73	159	21	465	306	304	75	125	66	560	698	1213	298	196	28	144	126	332	284	330	426
162	713	727	334	455	594	204	428	276	378	209	206	154	272	94	196	242	317	390	216	489	269	156	225	112	80	153	194	62	91	152	120	429	223	112	146	95	106	383	694	1492	352	212	34	227	99	172	192	185	281
163	670	789	567	308	558	128	301	293	504	181	152	273	212	162	170	290	237	348	409	544	184	43	230	106	189	180	270	225	193	64	148	503	305	275	152	82	97	459	693	1593	237	170	139	169	113	448	137	186	235
164	807	828	447	366	622	13	415	346	566	309	180	192	337	77	324	268	182	292	382	532	144	132	281	122	181	230	154	258	158	239	122	518	291	173	105	155	40	389	622	1800	248	317	50	162	51	230	237	214	247
165	655	772	516	493	414	257	233	339	438	272	265	166	276	103	327	216	403	300	431	397	206	61	270	173	210	271	184	201	174	100	156	567	181	343	145	217	44	495	555	1806	324	233	26	184	108	263	174	198	314
166	845	656	458	471	645	144	249	383	373	237	152	217	319	81	299	235	274	395	290	462	175	81	204	53	151	167	242	276	152	251	179	436	352	263	145	171	112	455	773	1590	259	268	59	175	43	287	206	243	199
167	886	861	631	381	462	96	334	323	355	291	203	174	293	117	191	288	261	387	346	420	137	83	141	94	128	112	129	318	194	253	187	513	227	199	131	132	81	508	487	1634	333	111	-3	175	64	346	208	329	228
168	733	730	446	408	629	114	426	300	372	232	284	174	222	189	140	147	291	489	353	413	187	109	321	124	119	125	141	200	186	186	270	516	217	180	59	128	103	590	476	1655	204	121	166	240	53	259	138	142	249
169	696	707	599	445	447	166	329	246	416	239	358	167	278	98	244	222	150	459	356	473	136	44	142	110	78	128	169	210	220	190	124	455	265	182	108	110	178	407	772	1514	213	188	140	178	78	253	160	305	230
170	624	730	348	290	473	152	205	335	412	179	414	217	291	75	234	288	261	488	282	459	140	107	247	150	100	203	150	194	145	201	138	553	321	200	167	100	109	381	556	1546	222	245	82	146	108	245	164	283	293
171	700	762	435	391	637	145	383	362	371	295	327	214	256	112	302	192	199	447	353	469	220	194	240	125	89	139	210	245	108	161	109	595	279	219	163	143	41	517	529	1472	169	269	21	211	28	288	176	222	289
172	714	753	360	401	562	228	353	362	340	199	257	224	352	125	259	219	134	521	250	516	56	186	193	130	106	168	191	345	212	156	106	402	210	186	90	97	47	504	506	1467	153	84	53	203	83	220	251	268	185
173	736	521	479	362	765	239	237	389	352	104	378	206	254	70	349	220	292	583	242	481	152	192	303	134	76	172	102	179	195	172	150	552	254	156	56	162	113	473	647	1564	213	227	45	224	50	283	357	256	134
174	760	687	437	271	540	68	342	296	429	160	267	239	247	140	184	186	218	447	322	491	143	64	197	38	215	165	173	318	183	221	149	521	189	212	155	117	155	560	699	1404	211	189	97	192	168	160	130	266	275
175	703	700	579	424	642	163	294	265	492	140	338	208	245	145	260	171	247	507	229	402	136	84	254	100	154	106	161	320	171	216	140	501	157	149	188	147	145	407	711	1435	159	316	79	243	119	204	72	163	246
176	834	835	486	340	701	203	292	331	402	265	333	302	217	135	283	155	247	612	444	503	67	50	192	130	66	137	126	332	197	209	149	489	208	193	111	150	120	594	608	1331	223	172	94	199	74	167	266	240	305
177	690	815	473	181	505	198	232	364	357	283	370	285	387	142	161	103	230	533	232	456	173	114	154	124	102	173	184	320	208	230	176	437	193	161	35	92	104	509	528	1340	181	180	5	277	87	147	81	235	367
178	788	758	342	412	601	160	371	320	294	264	322	210	305	181	265	254	290	511	347	402	199	124	263	217	1	78	170	213	101	122	17	406	217	259	63	256	111	432	732	1385	187	167	-19	241	83	221	109	193	198
179	827	820	398	409	557	124	219	372	248	140	303	133	261	126	202	216	300	551	236	503	86	70	171	121	123	145	194	302	150	192	142	456	137	225	91	111	136	465	706	1333	202	154	60	129	196	216	183	194	75
180	690	830	502	359	565	215	286	315	432	207	213	273	242	203	307	187	437	460	408	317	135	132	205	136	134	100	200	317	164	131	241	435	283	227	141	155	92	619	787	1328	341	194	44	247	116	246	205	265	192
181	631	809	529	227	536	152	284	331	302	124	340	175	226	193	156	230	392	361	290	402	162	23	190	129	89	102	157	348	187	155	142	575	254	249	99	130	137	528	694	1429	218	232	-9	183	84	230	164	133	218
182	740	601	409	315	600	192	228	371	321	151	271	181	278	68	267	151	474	440	318	348	156	67	192	126	120	122	146	335	145	170	183	486	209	227	163	126	81	430	676	1266	199	275	54	231	30	147	139	209	218
183	617	845	504	313	633	216	187	344	260	141	242	176	277	144	160	165	500	414	371	427	116	27	131	135	123	171	185	376	123	149	47	450	250	213	104	146	134	472	637	1330	174	278	105	141	140	157	128	351	80
184	742	812	458	279	647	190	241	345	309	185	240	341	241	148	198	176	487	480	306	359	125	68	236	92	128	145	138	282	158	82	215	307	237	140	155	170	91	327	812	1163	149	137	102	198	-28	176	176	104	266
185	445	916	493	324	679	98	370	367	320	222	323	194	306	149	256	182	455	481	331	560	172	40	192	70	72	105	141	287	107	163	153	480	350	270	49	111	88	507	758	1492	211	93	12	205	81	252	225	233	216
186	642	788	408	296	585	212	186	197	366	152	330	219	282	213	192	112	450	422	367	417	135	153	175	64	160	167	206	227	152	170	89	412	327	192	82	159	83	335	771	1381	175	128	-21	213	84	98	209	314	258
187	727	703	608	194	693	190	226	326	299	228	260	188	299	148	218	148	507	466	305	441	173	106	164	84	110	95	44	193	276	173	175	503	352	173	66	179	27	483	447	1365	155	185	14	241	76	244	162	133	194
188	613	676	432	369	626	195	299	310	275	185	337	226	326	100	313	122	457	446	306	454	167	41	240	151	131	138	-5	273	108	122	155	500	302	164	174	56	65	502	606	1118	142	190	75	262	101	284	145	287	97
189	667	842	471	422	478	131	323	310	308	171	293	163	340	129	150	197	421	398	196	474	166	111	157	74	55	171	151	245	163	212	186	519	227	195	117	129	49	634	685	1486	196	102	71	211	127	105	169	289	179
190	499	710	408	326	560	174	279	256	340	197	246	94	120	209	267	106	431	356	382	403	102	56	125	79	133	158	160	330	181	103	164	392	300	193	84	64	137	434	604	1392	261	87	19	168	45	143	143	240	253
191	540	875	515	388	593	136	256	270	292	119	288	205	258	215	154	78	504	341	309	423	119	113	238	24	192	117	182	258	162	152	154	448	312	198	113	51	91	562	576	1331	202	67	33	184	164	151	219	223	218
192	527	861	462	345	550	189	244	216	263	214	250	194	274	187	247	133	455	385	284	482	166	-7	210	134	255	197	73	335	182	198	73	524	301	178	106	163	161	513	798	1337	186	208	88	129	100	133	169	136	159
193	625	708	425	208	527	101	257	261	364	143	76	250	255	166	266	141	473	445	318	549	165	132	168	124	102	88	107	289	158	148	137	424	290	121	15	130	100	584	757	1259	165	124	93	150	112	151	214	251	169
194	547	854	557	332	545	182	268	310	278	202	299	207	204	117	173	145	376	373	317	380	63	67	190	102	141	142	62	263	277	99	154	407	245	190	70	148	98	403	679	1168	220	118	-45	146	69	154	43	199	175
195	515	822	342	322	713	186	229	256	354	214	227	234	225	201	284	68	475	395	289	591	177	87	169	76	155	151	64	248	201	173	94	395	233	198	152	145	61	522	600	1368	198	158	4	222	66	236	65	267	132
196	490	778	643	225	528	115	200	363	368	165	283	217	178	199	267	88	334	349	309	548	173	103	153	87	93	148	154	271	309	128	118	407	314	156	34	85	159	488	459	1248	164	85	-7	190	224	197	221	238	273
197	679	814	638	233	630	124	287	311	326	200	281	139	210	190	279	151	385	345	319	349	145	94	206	167	167	124	132	205	245	159	138	504	349	165	47	99	172	391	528	1247	200	213	56	282	84	168	160	113	180
198	627	809	378	277	582	154	371	342	370	165	208	233	277	215	170	74	388	280	213	489	135	107	219	100	141	216	158	253	209	88	263	334	349	307	112	151	84	470	537	1105	253	148	83	212	60	99	133	300	156
199	471	866	494	171	580	171	204	230	434	218	274	215	216	201	175	108	387	289	302	478	160	126	170	136	191	123	180	269	188	108	194	383	303	147	96	170	49	409	555	1241	170	111	-33	202	64	285	104	339	182
200	612	778	459	223	584	89	390	306	312	263	142	255	196	253	92	245	429	234	296	406	131	100	178	171	187	69	86	102	135	200	77	373	264	210	136	144	60	523	437	1250	196	114	77	156	34	201	132	163	246
201	717	788	466	205	461	124	213	301	394	165	156	208	193	270	260	108	513	380	275	493	90	130	172	17	116	120	183	191	198	144	145	470	239	107	103	126	24	315	575	1337	157	199	-19	234	124	264	192	299	68
202	486	811	433	317	565	225	229	230	386	208	210	238	193	262	182	89	500	300	338	443	153	103	146	130	93	204	123	306	231	130	149	360	338	135	98	101	187	556	680	1254	133	92	107	229	183	90	193	329	201
203	536	769	331	286	588	93	203	360	323	188	187	231	185	197	250	102	529	376	224	461	132	153	222	40	68	113	110	261	211	172	190	300	310	115	95	127	65	515	508	1360	180	148	152	142	127	60	194	176	169
204	399	833	253	328	517	191	390	237	324	269	218	151	199	176	207	137	341	222	233	372	204	88	171	33	173	71	120	245	227	95	71	405	316	218	116	129	134	523	546	1254	157	91	88	192	94	154	159	194	257
205	730	687	522	117	629	173	283	340	427	136	234	144	298	213	222	75	438	294	316	393	84	85	229	87	52	176	59	328	144	156	113	348	319	133	35	128	86	392	609	1236	195	183	-15	242	69	122	242	153	100
206	454	835	585	299	548	156	442	242	358	114	237	211	250	142	265	140	356	335	276	312	121	105	160	34	193	105	118	301	221	111	108	292	322	72	74	124	100	478	681	1243	243	152	34	403	-32	184	119	177	140
207	683	799	290	298	595	80	306	235	312	250	256	185	232	231	316	165	391	288	292	438	152	18	301	140	60	143	129	209	228	139	67	275	333	90	37	79	81	315	472	1155	132	170	8	143	80	147	248	214	250
208	628	857	490	202	508	182	381	254	345	225	112	113	220	262	235	34	425	269	272	342	89	230	227	26	88	109	74	307	273	115	211	342	342	111	156	161	144	371	711	1160	181	13	108	276	87	145	176	148	158
209	537	770	465	217	500	148	246	321	338	161	245	209	225	211	190	65	390	309	356	365	109	85	140	136	144	184	68	220	177	185	108	453	267	183	2	100	75	465	630	1095	64	184	2	177	86	182	204	196	219
210	515	785	416	124	578	201	280	289	304	126	172	221	220	128	212	120	350	312	279	417	195	130	235	138	123	83	126	289	305	232	145	347	349	166	122	118	76	393	539	1064	167	161	35	312	100	173	158	208	202
211	580	881	525	189	511	163	390	262	333	148	203	174	281	152	170	107	362	328	326	256	134	97	189	33	137	83	109	257	235	176	116	388	200	123	48	146	95	363	599	1070	133	147	-15	321	296	174	138	212	81
212	509	685	389	343	483	150	253	185	237	85	256	271	222	131	269	78	427	211	197	343	127	101	244	-24	92	167	105	217	207	133	78	417	273	163	99	163	120	543	599	1111	150	124	88	204	161	33	66	190	140
213	499	840	246	143	641	192	242	346	260	216	238	170	170	222	257	212	399	276	216	297	150	121	176	65	132	67	108	219	260	149	178	312	214	93	88	114	121	571	522	1127	35	139	32	157	271	65	104	248	76
214	446	697	497	153	478	71	213	252	349	246	165	220	195	217	231	70	370	272	255	296	129	205	191	101	131	155	121	203	245	108	134	399	253	176	27	83	9	434	543	1167	169	135	-78	245	197	177	93	181	113
215	410	780	402	170	605	62	293	290	294	136	148	248	159	294	243	59	310	274	317	358	109	50	235	56	96	126	122	202	231	119	104	392	218	204	28	145	177	331	667	1155	144	144	23	212	92	121	92	262	222
216	537	803	455	207	510	162	215	259	320	194	162	218	79	129	211	118	370	341	213	398	265	117	253	68	149	59	59	182	197	178	39	429	314	74	96	142	64	509	600	1248	163	160	32	276	208	148	217	155	168
217	559	774	483	153	583	138	282	223	236	226	168	200	144	144	193	36	233	373	314	305	126	57	110	189	190	125	83	283	334	90	100	380	216	180	104	30	167	375	439	1285	136	237	-27	346	125	86	112	194	174
218	409	819	557	213	468	184	340	190	170	162	225	218	100	181	252	79	191	285	430	306	201	117	246	173	143	51	156	239	183	199	106	182	145	135	81	97	212	399	678	1083	199	192	66	202	138	123	166	165	55
219	562	737	315	184	521	130	253	188	248	206	144	200	246	194	342	40	249	349	197	338	130	88	203	150	133	149	140	195	298	184	239	463	214	249	32	48	136	353	559	1355	263	112	16	213	154	75	89	161	75
220	516	679	421	160	492	159	370	387	279	119	282	167	125	180	204	122	325	347	331	217	94	120	241	123	159	33	68	221	309	221	185	299	249	180	136	123	87	476	380	1135	138	123	101	182	269	89	150	273	211
221	424	909	627	212	603	145	198	250	214	150	180	239	83	145	130	265	265	225	280	267	107	118	226	140	47	170	166	302	311	53	202	417	318	167	137	76	110	521	573	963	164	141	88	120	207	159	164	250	44
222	453	779	390	295	567	108	250	232	124	196	189	235	202	202	223	114	330	322	232	319	180	65	135	171	211	112	120	196	297	101	166	352	169	147	236	161	51	553	600	1022	214	198	13	230	96	110	67	274	91
223	461	803	412	99	504	124	284	250	251	178	260	224	337	128	290	83	295	230	286	371	114	15	188	106	96	142	148	221	252	80	93	351	256	183	106	57	52	524	643	1121	99	114	64	217	73	101	113	246	158
224	579	728	491	134	612	125	268	210	158	162	181	199	139	125	202	176	274	292	223	293	226	96	145	98	180	129	69	158	236	88	187	314	193	117	63	98	52	598	600	1124	167	92	168	208	137	199	100	142	158
225	446	734	376	197	528	112	187	239	185	72	174	271	234	93	273	123	239	307	328	205	175	53	238	55	224	184	211	248	244	144	199	368	256	160	104	126	146	416	508	1203	102	107	23	144	88	115	90	143	76
226	459	753	400	7	637	166	186	304	172	120	187	241	268	196	282	118	240	234	272	297	58	55	165	28	93	137	136	173	299	139	121	401	191	136	156	161	141	375	631	1194	133	176	3	327	126	61	159	274	172
227	400	917	533	274	592	215	314	281	249	182	202	194	263	221	247	43	275	233	260	372	132	64	273	48	102	224	165	279	258	173	43	294	211	151	116	190	92	446	676	1093	271	200	-49	222	102	146	133	329	100
228	431	714	519	350	514	92	213	227	207	99	172	313	138	164	216	97	197	199	391	231	153	82	264	40	183	172	89	224	256	154	57	350	196	116	82	110	86	514	744	1117	200	267	112	232	0	73	150	224	283
229	469	639	516	263	483	121	168	256	259	144	317	369	196	97	100	60	206	336	242	285	147	150	201	105	183	58	109	149	328	94	203	282	234	208	53	107	117	423	559	1203	139	163	63	243	120	116	170	204	47
230	467	732	310	243	519	196	251	266	163	219	263	160	214	105	168	81	220	209	364	237	46	10	174	161	149	116	171	285	289	116	100	309	253	204	62	143	63	467	684	1021	118	43	115	177	46	61	14	172	206
231	497	793	448	158	558	182	158	229	194	184	338	210	119	137	175	133	186	287	307	353	119	103	170	21	168	74	125	222	317	195	104	386	167	124	87	172	20	535	495	1185	202	77	40	138	182	146	154	291	134
232	539	784	325	258	702	183	286	310	137	117	222	203	136	131	174	94	164	289	315	239	182	88	217	73	87	147	68	163	165	141	113	322	215	134	62	112	142	534	664	1112	40	173	-29	201	162	66	197	207	147
233	424	832	336	355	773	89	229	328	165	209	245	268	263	91	151	-39	199	322	225	316	172	87	171	53	160	170	110	286	311	89	118	264	165	147	103	91	177	415	643	1073	187	147	96	267	114	148	177	226	222
234	506	942	450	269	671	148	188	324	357	220	225	189	171	12	210	151	186	322	307	226	95	114	270	54	130	94	103	262	237	144	150	302	167	153	156	147	26	521	436	1079	151	90	23	263	110	148	97	193	106
235	644	764	233	332	472	131	218	217	125	232	250	337	250	149	327	118	114	340	327	290	159	121	195	146	21	83	141	231	234	141	204	371	191	85	97	77	89	445	536	1236	145	151	75	241	109	126	233	151	140
236	387	735	385	243	691	102	366	190	196	206	259	178	242	103	269	122	203	339	238	186	73	150	133	86	160	266	125	214	223	210	147	232	183	202	107	93	83	416	587	1219	168	155	150	189	85	91	160	202	117
237	716	789	452	274	699	250	223	310	140	169	132	309	215	103	188	-16	137	339	221	264	195	107	180	24	140	148	91	234	273	116	187	352	121	228	171	117	100	534	515	1123	162	221	45	293	4	126	75	262	52
238	438	687	449	254	597	207	314	181	253	166	153	280	239	109	216	131	177	269	339	213	174	9	181	68	174	181	38	244	191	195	178	389	154	217	90	169	33	548	654	1153	158	140	7	218	11	122	80	306	172
239	445	847	361	137	648	222	237	207	238	139	201	284	166	176	235	77	121	277	197	293	116	127	210	20	172	150	97	205	240	127	169	317	189	248	72	113	58	399	463	1114	93	109	48	215	131	36	53	187	236
240	542	871	446	226	611	223	303	297	178	195	202	321	152	110	166	53	158	241	361	226	51	180	269	92	186	98	142	192	277	177	147	288	218	142	144	107	100	605	599	1268	80	189	66	61	39	141	150	277	82
241	496	794	471	241	593	106	263	198	93	154	119	227	247	139	237	43	141	329	306	287	168	35	147	63	127	197	115	129	158	100	194	324	120	114	19	107	160	484	459	1097	128	136	-15	208	124	180	56	227	209
242	357	706	494	265	658	147	233	266	148	148	190	279	236	162	199	62	148	198	261	263	109	81	230	132	76	148	81	176	205	141	263	316	255	166	38	146	99	397	609	1292	131	150	43	163	92	209	96	167	131
243	544	827	487	191	558	227	320	186	107	186	139	188	193	136	203	122	83	323	285	282	80	123	192	63	137	84	29	181	245	154	119	314	217	175	68	146	56	498	719	1066	214	110	47	158	39	118	36	231	103
244	502	790	518	257	646	182	333	198	220	121	170	184	259	241	229	128	57	269	395	207	166	-31	212	33	140	218	152	257	278	187	193	290	171	187	89	89	63	560	555	1127	122	211	84	141	-29	107	156	216	78
245	644	813	327	351	707	104	171	317	192	282	120	169	185	134	161	75	174	236	282	329	164	154	202	28	6	62	70	319	254	175	147	174	185	172	105	205	130	476	697	1109	114	144	-51	149	52	127	67	175	170
246	600	669	410	178	702	164	297	226	235	162	93	239	201	101	278	110	108	269	396	323	89	26	223	65	89	40	206	140	71	100	115	259	92	193	71	188	75	583	559	1080	138	157	17	230	40	101	138	157	198
247	550	797	536	212	602	172	343	232	63	214	68	276	191	205	268	25	300	209	327	218	167	77	267	57	104	122	103	259	240	147	145	266	192	79	53	87	161	566	603	1142	90	195	106	226	66	19	132	176	272
248	442	726	529	152	576	165	275	279	107	163	281	249	264	136	194	172	148	301	379	284	30	139	228	124	152	86	122	293	178	160	127	338	217	71	132	92	111	510	587	1177	159	175	54	200	126	170	100	208	211
249	503	728	481	158	574	156	360	203	181	144	104	171	322	154	251	135	175	315	246	358	150	79	199	147	157	126	38	244	196	157	210	392	173	180	173	129	128	551	745	1029	160	123	34	206	141	134	148	267	95
250	520	705	524	133	595	214	246	181	212	185	139	281	167	107	272	166	216	270	292	257	102	166	249	113	156	135	78	224	158	176	172	257	193	226	45	121	60	582	554	1177	196	195	2	224	82	125	179	278	77
251	513	884	369	285	484	168	189	292	134	302	213	284	195	110	291	63	118	309	290	226	185	78	164	82	126	143	74	251	226	174	162	278	158	125	109	123	-6	583	456	1236	245	164	117	183	59	159	181	160	112
252	510	708	405	244	606	156	216	243	163	218	252	254	107	61	251	96	66	211	262	354	62	111	183	78	155	209	72	172	267	171	174	260	242	146	124	103	160	444	557	1208	180	132	6	185	-30	199	195	278	72
253	492	851	503	247	602	191	253	217	234	173	214	301	130	200	360	71	223	342	211	252	134	-1	187	107	33	124	77	285	214	154	116	426	25	141	113	192	36	632	490	1206	104	127	155	241	81	0	127	314	62
254	618	675	463	217	567	141	338	213	141	202	145	284	236	105	218	66	170	312	427	274	118	92	198	87	69	200	101	243	252	170	83	296	168	163	23	171	95	577	598	1262	157	134	12	223	141	58	137	203	89
255	492	736	383	280	527	196	150	284	197	185	158	263	71	110	237	122	116	269	267	301	27	127	192	82	69	55	85	220	208	155	179	278	181	147	24	119	67	497	560	1079	195	80	115	142	43	54	284	289	200
256	396	851	385	295	672	128	258	305	160	203	215	197	243	175	176	50	173	385	257	263	189	220	188	57	166	67	121	228	259	163	155	333	171	247	79	147	69	537	584	1149	133	149	50	194	66	129	90	258	226
257	517	747	386	217	697	82	310	312	68	191	166	225	204	137	285	96	78	321	219	308	136	-10	140	67	10	179	45	258	303	45	151	320	186	73	81	35	155	424	465	1204	110	109	47	177	122	96	84	278	169
258	502	768	485	134	603	68	277	236	207	87	232	329	151	151	230	87	144	329	276	208	68	77	252	79	72	235	121	368	137	176	227	362	211	201	129	140	113	518	536	1274	197	96	-37	65	195	117	170	247	264
259	417	760	531	252	621	114	265	186	179	35	137	347	174	283	143	199	153	415	333	259	142	162	270	94	150	190	216	223	229	74	133	412	254	119	27	213	63	454	471	1129	176	141	-3	91	116	7	103	326	95
260	643	836	443	309	588	215	250	255	144	180	247	232	248	60	256	118	96	215	347	201	159	59	241	-29	91	142	125	157	160	209	140	401	170	135	62	100	101	525	574	1119	178	94	87	120	63	121	158	259	249
261	737	811	399	238	659	106	184	288	212	184	153	238	187	84	308	163	132	226	355	204	144	77	166	108	108	96	192	315	307	119	98	268	233	190	104	156	68	442	584	1129	146	177	23	273	99	174	38	145	189
262	495	635	492	139	561	148	319	222	235	140	137	260	78	205	210	140	99	329	284	227	126	60	98	104	106	70	161	311	244	231	185	258	231	163	18	94	132	420	502	1063	180	95	-6	183	112	103	139	172	142
263	506	746	487	362	697	146	209	277	142	230	129	278	181	110	222	112	184	234	302	283	113	36	126	93	153	161	121	256	113	52	187	309	190	166	66	213	154	503	371	1173	131	90	0	232	98	173	103	293	191
264	407	713	460	317	591	117	175	231	118	162	163	152	213	145	332	137	202	243	309	335	79	65	224	41	100	102	173	155	267	126	149	364	218	180	49	99	129	427	576	1095	237	124	54	219	68	194	52	237	251
265	536	647	522	54	782	70	326	228	202	257	235	276	159	191	325	158	161	399	233	286	105	118	151	-16	177	107	203	232	317	147	189	295	148	203	103	195	80	534	536	1220	218	189	68	135	10	160	195	216	243
266	593	739	538	248	657	184	317	242	188	159	213	301	226	148	307	60	176	220	271	155	63	-29	153	64	170	115	107	150	264	99	167	340	136	130	139	129	186	475	653	1005	211	116	14	196	78	141	173	196	155
267	465	772	502	251	687	148	278	212	122	169	183	230	186	240	310	83	182	318	364	333	36	106	226	-13	186	196	58	124	318	183	222	406	274	126	71	121	61	547	440	1156	210	87	86	200	53	136	186	281	165
268	393	862	303	192	596	69	327	249	110	114	150	260	157	92	244	109	186	307	339	189	107	80	272	38	151	63	156	238	288	141	154	311	183	142	152	124	39	462	482	1256	55	177	144	401	109	180	231	178	21
269	509	772	438	106	720	156	296	290	196	160	212	294	298	40	302	23	118	219	303	389	171	75	158	9	86	117	135	182	208	238	128	297	198	173	23	93	157	500	595	1081	154	151	72	90	39	160	107	298	144
270	575	827	460	226	635	112	256	191	55	151	139	288	110	142	272	83	185	321	286	228	120	114	159	10	74	64	44	239	203	161	255	299	100	131	39	93	65	466	576	1197	158	63	110	322	132	60	123	265	227
271	489	842	347	184	743	155	146	288	172	100	125	139	250	182	218	35	138	256	174	287	85	100	183	102	135	117	119	231	297	94	227	244	208	141	60	90	52	439	541	1299	137	163	27	174	81	75	18	114	182
272	497	884	526	262	711	103	307	239	110	218	140	233	163	150	153	89	187	284	287	231	130	168	214	41	87	129	115	259	244	147	106	169	76	120	71	162	70	452	650	1115	76	146	79	229	93	67	40	280	191
273	479	748	316	248	582	224	262	313	153	100	238	318	220	122	193	196	199	261	244	361	118	107	252	41	132	155	115	206	223	46	187	344	177	117	73	68	-15	517	475	998	231	198	67	239	63	178	101	363	72
274	559	692	576	277	588	173	355	300	103	163	275	254	123	109	178	110	34	248	272	215	123	48	163	25	179	146	64	157	189	208	175	386	266	211	149	135	170	518	577	1165	116	190	48	226	44	97	193	176	133
275	711	805	308	99	622	270	311	376	179	263	229	302	182	102	209	47	149	236	274	147	119	91	255	52	138	63	86	295	218	76	148	252	158	153	72	158	120	541	622	1065	55	88	39	297	25	186	134	167	9
276	496	792	450	299	758	154	192	269	117	163	96	323	196	142	250	125	214	262	281	337	194	105	154	128	31	113	85	234	173	222	185	301	225	187	101	123	134	373	637	1338	257	208	-37	198	145	46	210	294	119
277	634	857	412	238	679	93	307	231	208	164	186	266	133	191	197	103	93	347	277	311	152	100	142	73	179	98	141	228	236	160	168	427	189	72	130	169	55	480	563	1059	107	97	65	278	38	143	101	212	49
278	502	945	365	308	608	177	282	189	210	200	105	239	152	108	231	159	83	238	293	205	99	57	181	143	167	125	23	189	157	180	204	363	226	165	37	137	124	391	508	1076	137	74	94	196	61	57	126	273	137
279	568	818	285	222	721	237	235	190	197	103	122	347	160	123	316	153	121	232	295	357	155	96	140	120	112	135	147	209	169	246	137	388	159	267	101	83	77	510	512	1298	186	162	-7	231	96	234	143	313	117
280	621	840	355	85	571	96	226	322	131	162	149	306	196	140	255	94	145	216	291	252	111	86	202	109	100	139	101	256	252	201	133	249	138	150	44	190	26	515	585	1217	174	57	70	125	152	212	170	232	135
281	583	539	393	179	563	170	341	259	150	165	51	321	201	56	132	124	55	242	333	284	162	135	199	71	203	134	44	197	133	205	160	357	181	250	76	49	89	525	645	1207	172	114	-28	245	70	105	110	208	198
282	499	692	308	276	543	70	230	307	95	255	206	360	269	132	301	48	203	290	217	239	148	51	140	43	127	139	139	150	230	187	122	253	61	120	37	116	146	590	526	1187	212	108	-45	249	100	156	106	276	233
283	547	879	491	162	629	137	272	326	77	116	83	340	154	217	260	45	146	240	185	244	101	97	218	41	114	151	65	110	170	258	109	347	242	180	70	103	53	395	506	1310	172	84	47	159	95	270	202	184	100
284	523	690	297	302	687	67	309	226	162	233	210	237	144	234	234	131	130	285	269	249	145	152	224	30	103	110	104	134	132	251	40	309	240	179	108	113	39	484	529	1138	117	130	32	245	125	131	107	234	101
285	451	732	394	181	629	108	307	250	70	193	202	307	144	188	272	57	199	220	189	303	137	46	200	31	171	67	108	254	154	260	188	259	133	246	113	135	173	507	576	1292	192	293	-38	230	63	106	133	268	121
286	474	700	496	152	683	199	194	310	168	151	162	257	206	107	261	118	73	324	292	310	94	89	289	46	128	146	100	245	127	320	137	304	153	142	55	55	96	473	509	1180	51	139	93	247	98	91	130	235	196
287	511	856	408	382	612	106	332	280	201	126	201	183	213	211	268	152	146	230	214	189	152	79	158	44	39	89	204	112	227	215	174	434	238	174	146	92	108	348	557	1212	184	142	161	117	63	125	122	320	148
288	553	691	551	225	522	172	348	316	184	221	248	242	163	46	199	94	110	175	194	194	178	50	242	-6	131	129	132	199	220	221	253	343	174	189	93	112	68	386	483	1213	270	140	75	185	45	121	192	214	236
289	659	763	388	204	658	165	290	262	43	194	89	251	242	144	204	69	123	354	364	213	139	75	214	42	33	243	136	216	227	247	240	381	204	204	76	171	105	401	606	1211	181	68	-25	249	127	140	175	231	145
290	515	816	393	251	712	163	213	270	79	238	168	311	184	144	317	85	112	307	275	246	112	67	164	48	123	144	41	302	174	128	119	261	201	181	82	107	83	512	401	1303	152	197	-17	177	97	102	244	244	198
291	437	808	527	290	590	198	364	322	92	185	111	262	170	112	304	84	176	237	233	235	136	28	175	39	158	46	175	246	153	134	166	326	126	194	44	148	41	281	520	1298	165	81	35	258	103	201	223	132	146
292	460	798	315	160	609	127	373	309	185	129	183	365	181	137	229	122	87	242	324	238	79	47	163	81	140	194	121	202	234	145	72	300	257	198	134	108	77	524	512	1330	165	164	55	215	83	98	66	289	235
293	534	711	348	236	685	200	264	197	159	198	121	272	146	126	261	150	140	229	305	220	87	129	165	112	128	166	49	157	171	208	120	318	165	147	78	78	100	449	566	1257	186	89	-9	158	137	126	159	329	131
294	606	658	452	241	670	124	338	153	181	175	259	228	272	113	185	124	156	346	302	306	126	136	145	-28	127	125	136	67	243	192	194	213	189	142	150	81	77	613	478	1120	160	275	170	176	89	136	84	153	129
295	420	705	328	313	788	101	154	328	192	121	181	182	232	104	312	129	112	297	310	324	197	-35	231	77	112	143	112	227	227	213	92	336	128	242	41	168	21	443	513	1172	216	167	63	178	48	140	180	262	240
296	264	799	360	189	691	236	382	148	82	117	185	310	310	133	255	160	103	296	233	242	165	48	147	22	257	49	45	201	250	132	107	322	209	137	45	150	50	392	404	1201	126	141	86	120	83	30	167	287	97
297	598	941	528	256	709	154	385	308	195	220	328	155	147	116	233	179	172	228	254	282	125	54	354	78	90	118	187	126	157	190	208	390	64	154	59	173	68	342	568	1399	159	130	128	301	63	101	191	254	158
298	432	859	321	218	715	31	205	298	160	95	161	137	97	220	278	80	148	284	242	320	99	169	237	34	133	113	108	171	250	261	126	335	242	184	43	87	138	577	586	1085	88	203	34	188	145	164	117	287	263
299	525	772	299	318	562	168	289	303	180	235	210	339	132	137	217	162	152	260	189	262	178	53	209	16	208	161	102	286	190	227	183	298	199	168	74	119	68	562	593	1152	103	149	-7	213	105	160	154	152	185
300	463	648	377	256	611	153	336	309	135	313	235	224	170	151	236	53	13	337	69	344	189	89	214	11	195	135	125	139	117	256	198	333	254	97	102	94	121	352	659	1269	178	163	-9	104	73	209	77	262	187
301	535	705	347	230	569	89	337	280	98	169	197	274	178	93	209	76	147	357	233	294	93	103	165	69	131	93	107	172	84	99	130	302	212	142	139	78	97	488	522	1154	162	161	41	110	129	100	71	245	138
[truncated: 855 more columns]

## Sheet: AWAChr,AWAGC WT,unc13
Figures 3EtoG, 3S-1D, 3S-1E
AWA::GCaMP2.2b F(A.U.)
Stimulus:	AWA::Chrimson
Genotype:	WT
N:	1	2	3	4	5	6	7	8	9	10	11	12	13	14	15	16	17	18	19	20	21	22	23	24	25	26	27	28	29	30	31	32	33	34	35	36	37	38	39	40	41	42	43	44	45	46	47	48	49
Frame (Pulse at 100)
1	685	1676	888	400	203	1458	1025	561	1143	859	1474	822	504	501	403	640	886	669	1044	1416	595	997	746	1684	908	478	675	417	746	2076	4435	3406	1916	2091	2746	2149	3003	617	913	657	306	213	1355	825	1009	1000	675	1416	681
2	700	1639	894	483	243	1445	1105	873	1135	832	1459	854	549	624	441	675	698	838	917	1411	510	1023	666	1556	878	425	651	572	572	2047	4099	3320	1985	2296	3013	2101	2898	700	794	658	255	213	1225	938	838	957	876	1484	902
3	680	1540	789	398	223	1404	924	963	1107	805	1383	799	514	509	422	744	930	865	1071	1321	780	1088	745	1412	843	503	619	465	680	2270	4130	3632	1741	2122	2938	2245	3114	568	900	704	282	237	1187	801	1026	948	672	1621	785
4	674	1645	877	433	232	1446	972	1017	1172	732	1450	812	534	398	404	674	751	900	1109	1349	705	1038	623	1565	801	507	683	591	771	2134	4027	2887	1903	2189	2739	2044	3097	536	904	587	383	192	1249	914	1019	1105	1018	1406	799
5	613	1791	911	391	247	1445	939	1084	1128	865	1547	866	503	616	483	728	655	938	941	1363	695	1034	656	1406	856	542	616	542	661	2317	4521	3227	1793	2117	2999	2247	3238	606	946	531	329	207	1371	820	867	1000	805	1353	933
6	682	1714	888	458	181	1366	1054	915	1130	801	1526	879	437	657	368	624	728	798	1022	1530	561	1039	682	1646	944	530	713	415	645	2171	4333	3370	1946	2257	2772	2076	2807	552	1010	513	380	156	1160	907	971	927	775	1482	858
7	668	1689	826	372	186	1390	911	1024	1035	771	1555	822	538	545	453	769	689	811	939	1254	622	978	652	1381	802	510	704	490	684	2338	4248	3407	1712	2081	2606	2188	3003	588	851	664	285	260	1187	879	955	1135	697	1496	737
8	567	1650	1019	451	226	1331	975	1042	1122	815	1428	742	464	592	495	776	625	885	1172	1505	620	1071	661	1538	756	471	634	435	690	2292	4274	3244	1756	2256	2592	2231	3086	659	991	581	412	205	1328	846	950	1017	742	1471	795
9	480	1614	920	473	238	1230	1051	916	1020	774	1371	823	495	555	541	657	801	773	1111	1469	603	1057	701	1493	821	500	654	453	613	2300	4296	3475	1677	2370	2687	2095	2833	555	912	729	363	260	1301	895	979	973	785	1445	903
10	611	1784	808	453	339	1190	984	992	1199	687	1503	770	536	601	383	656	700	852	912	1330	777	971	703	1634	742	534	634	389	603	2271	3981	3184	1716	2112	2571	2086	2973	567	836	551	358	354	1210	914	961	1039	696	1603	779
11	741	1737	871	353	149	1501	1057	819	1145	830	1636	712	500	582	497	681	742	726	1021	1509	703	1092	642	1329	852	486	685	512	771	2253	4189	3522	1925	2156	2504	2125	2949	606	988	637	346	166	1373	930	983	957	741	1517	957
12	735	1781	856	462	233	1486	1080	1028	1109	804	1576	766	573	439	452	772	913	780	978	1460	651	1053	650	1648	842	516	493	446	699	1949	4171	3027	1981	2076	2634	1978	3097	635	1004	718	398	223	1155	942	1016	990	910	1486	876
13	704	1808	814	448	245	1098	936	1124	1087	832	1484	885	524	639	409	720	831	773	1107	1502	547	1060	670	1498	823	460	620	375	729	2191	4233	3383	1883	1980	2728	2135	3127	547	1015	793	326	272	1249	980	992	976	741	1495	781
14	612	1496	911	395	228	1372	933	1092	1048	807	1398	807	456	496	480	687	872	769	903	1461	868	1031	784	1702	885	602	692	547	769	2110	4445	3387	1701	2369	2655	1868	3181	629	970	600	294	165	1266	929	1081	973	805	1561	777
15	657	1661	885	436	261	1494	708	1005	1097	955	1516	742	468	544	464	719	845	799	1017	1322	566	1106	765	1625	841	631	772	426	668	2221	3971	2972	1843	2102	2597	2108	2998	447	948	682	325	172	1142	875	876	915	730	1542	839
16	662	1703	909	318	298	1397	949	1082	1167	865	1392	651	510	638	584	812	733	637	952	1402	718	1163	683	1592	910	488	677	484	808	2261	4493	3377	1553	2304	2782	2158	3127	684	1074	705	300	256	1378	1049	973	983	819	1392	866
17	612	1581	800	460	233	1416	990	1025	1104	854	1442	805	525	578	496	786	870	768	955	1343	697	1129	713	1593	885	502	664	499	713	2353	4194	3320	1799	2025	2746	2073	3088	566	1010	676	362	148	1226	845	949	902	965	1594	808
18	616	1693	802	457	249	1307	981	999	1073	754	1433	753	499	648	333	644	842	518	1065	1506	428	1145	615	1627	892	545	637	519	628	2102	4065	3519	2079	2102	2663	2127	3140	558	969	767	237	249	1294	856	919	1072	735	1371	885
19	583	1627	818	413	275	1493	943	918	1070	937	1518	858	482	579	509	748	790	553	1038	1242	731	1167	608	1599	859	459	646	448	622	2344	4365	3246	1586	2083	2639	2097	2989	674	922	649	379	194	1204	962	885	952	658	1642	763
20	646	1810	885	354	238	1402	1085	871	1139	838	1589	822	526	596	467	806	864	759	956	1439	816	1055	618	1607	808	557	590	485	788	2113	3985	3297	2001	2284	2584	2082	3051	625	944	755	282	191	1054	921	909	985	717	1464	825
21	780	1678	907	469	338	1575	1128	1051	1059	860	1565	825	459	500	395	714	810	893	890	1389	613	1055	535	1743	815	552	671	474	678	2226	4212	3192	2081	2181	2820	2169	3130	550	979	678	318	189	1319	866	918	1058	730	1417	859
22	685	1693	888	470	275	1516	984	1092	1202	803	1396	799	530	637	516	632	883	730	1086	1422	730	1188	598	1680	834	576	663	573	781	2310	4180	3140	1795	2164	2569	2052	2954	594	836	719	288	288	1303	834	947	900	880	1478	773
23	689	1613	869	447	314	1454	1086	1072	1066	861	1525	710	409	514	427	701	814	841	1116	1407	888	1107	664	1477	749	456	520	316	721	2254	4201	3257	2073	2149	2926	2224	3309	629	937	689	339	266	1148	960	884	1062	742	1378	873
24	629	1505	899	436	206	1455	1075	923	1069	835	1584	739	548	648	418	723	803	870	925	1573	637	1131	662	1514	903	481	552	466	738	2139	4050	3007	1704	2084	2499	1993	3012	569	936	780	311	209	1223	737	916	966	758	1489	780
25	630	1678	958	457	291	1332	1021	1097	1201	789	1476	709	576	533	485	617	759	463	1087	1270	635	1049	570	1449	790	505	643	415	818	2122	4250	2684	1683	2096	2786	2403	2950	523	945	652	400	145	1395	943	971	972	731	1465	789
26	503	1777	892	399	267	1513	1074	995	1098	801	1456	749	478	574	441	676	864	724	976	1448	645	1104	602	1420	790	616	670	503	643	2458	4283	3270	1776	2162	3130	1828	3016	628	946	743	360	146	1308	818	1067	975	822	1507	889
27	600	1726	845	411	138	1189	945	962	945	765	1410	853	458	492	325	785	837	805	946	1555	682	937	595	1317	767	562	669	474	707	2063	3994	3078	2166	2301	3101	2038	2973	620	801	747	412	202	1224	908	818	956	699	1451	955
28	613	1635	969	420	319	1200	1006	967	976	753	1514	793	516	565	451	693	811	791	846	1255	777	1100	687	1325	744	487	546	384	764	2320	4162	3082	2024	2229	3266	2200	2828	685	935	470	363	249	1116	1047	694	1011	878	1462	837
29	722	1777	936	392	133	1385	1145	998	1193	893	1594	715	424	566	489	679	809	797	955	1575	692	1108	718	1613	844	543	582	372	759	2065	3785	2914	1825	2375	3197	1999	2897	520	1045	633	373	231	1163	1010	984	951	709	1631	924
30	619	1592	913	433	215	1453	1079	1137	1072	876	1506	812	620	513	482	712	949	742	1081	1387	638	1154	610	1383	807	538	613	501	714	2107	4239	3195	1549	1934	3286	2354	2931	570	887	733	340	201	1371	953	918	968	739	1439	875
31	640	1815	958	429	240	1374	1023	1112	950	850	1492	681	528	531	503	644	660	558	996	1375	633	1086	599	1489	803	534	647	456	539	2375	4351	3277	2075	2146	3010	2116	3098	594	933	601	359	327	1317	984	997	969	690	1634	821
32	596	1648	993	359	216	1368	1196	883	1061	785	1487	819	509	586	493	634	696	695	1010	1384	670	1188	563	1547	817	536	608	426	637	2155	3936	3160	1788	2074	2901	2119	3042	628	981	560	354	232	1338	981	1033	990	983	1363	707
33	530	1680	962	376	230	1168	1169	904	1243	831	1381	816	602	570	396	731	793	560	983	1242	933	1100	540	1461	840	545	569	478	726	2059	4173	3044	1618	2005	3100	1920	2906	604	953	549	348	204	1306	847	739	1026	789	1474	774
34	573	1666	864	239	288	1252	1154	1014	951	834	1496	753	466	486	513	697	639	540	929	1426	588	1162	664	1591	937	517	546	449	664	2403	3882	3140	2133	1999	3022	2339	2912	528	898	538	365	169	1303	837	903	908	702	1570	763
35	578	1694	862	452	182	1448	944	929	1010	738	1316	824	429	629	491	688	630	899	1179	1351	834	1104	638	1555	759	474	542	448	660	2271	3981	3128	1709	2141	2947	2071	3049	554	951	632	397	158	1283	893	897	965	876	1543	776
36	695	1607	974	362	214	1239	1115	1107	1060	847	1524	806	460	519	511	691	881	807	1080	1484	537	1088	599	1714	848	511	650	494	807	2357	3957	3076	1897	1950	3049	1916	3033	560	880	630	341	202	1373	981	983	919	655	1573	893
37	751	1534	813	376	287	1055	982	955	1144	866	1446	779	533	643	481	727	791	501	1190	1601	773	1180	534	1568	901	463	654	495	642	2234	3834	3016	1910	2084	2631	2315	3197	577	917	649	272	222	1369	944	888	941	847	1512	806
38	622	1543	735	426	321	1348	1008	930	1133	786	1419	846	571	599	435	653	680	922	928	1345	630	1113	627	1361	973	495	582	479	803	2334	3968	3210	1900	2175	2757	2276	2973	560	1029	714	299	283	1285	939	785	829	798	1380	818
39	621	1671	990	438	239	1350	991	913	1175	764	1531	798	576	542	481	666	896	755	1069	1365	479	1136	603	1454	821	518	553	479	711	2243	4012	3235	1863	2064	2610	1997	3058	573	970	749	380	107	1049	885	879	986	824	1446	798
40	614	1672	892	361	330	1388	1159	952	1194	758	1521	873	530	531	434	716	687	759	997	1454	613	1104	604	1544	780	507	691	450	699	2242	3927	2890	2009	2184	2950	2066	3178	542	943	549	438	196	1288	856	932	1077	904	1361	824
41	619	1671	882	365	279	1176	1084	1076	1087	858	1528	665	494	527	582	674	727	705	853	1334	611	1219	648	1317	823	438	634	418	740	2079	3816	3262	2000	2096	2919	2047	3191	666	954	728	352	172	1237	858	847	1077	921	1520	917
42	565	1656	861	539	162	1208	1000	991	1111	829	1399	753	419	600	424	640	841	727	1023	1439	626	991	602	1362	790	547	545	451	721	2319	3988	2863	1804	2141	2941	2184	2937	487	955	701	464	322	1291	926	900	954	681	1442	819
43	616	1604	921	468	273	1400	1052	998	1159	848	1455	862	420	576	455	828	820	829	941	1426	623	1015	549	1422	835	427	605	485	731	2149	3741	3150	1732	2231	2722	2118	3215	523	1057	697	326	160	1077	911	914	1039	839	1442	780
44	695	1565	886	470	248	1198	909	1041	1025	979	1515	942	559	563	396	683	933	748	989	1380	679	1143	637	1490	937	541	567	415	798	2389	3930	3283	1887	2249	2927	2117	3141	607	952	739	317	156	1380	909	908	979	668	1402	918
45	558	1661	844	412	283	1421	1058	879	1146	956	1565	790	532	552	538	765	696	820	1076	1281	697	1027	590	1395	755	488	610	489	614	2175	3842	3264	1811	1931	3112	2190	3020	631	992	696	383	249	1289	658	925	934	947	1546	853
46	655	1670	834	383	258	1441	1022	877	1036	844	1495	841	540	611	534	686	804	756	1066	1180	536	1018	746	1545	835	474	551	458	736	2343	3883	3014	1785	2048	3104	2030	3032	640	911	677	423	234	1344	924	490	858	986	1468	800
47	633	1648	814	389	353	1323	1010	964	1050	738	1568	741	404	546	404	767	586	997	1080	1262	536	1125	646	1566	802	500	613	486	764	2514	3788	2860	1902	1988	2689	2219	2981	548	1061	587	366	191	1289	875	922	953	770	1488	714
48	620	1564	861	404	220	1378	1113	985	1124	760	1451	680	587	532	505	762	740	702	1048	1513	750	1110	597	1440	821	495	617	480	625	2407	3824	3267	1924	2041	2832	2161	3224	532	968	788	338	264	1331	933	864	1041	680	1480	825
49	608	1561	803	339	231	1330	1113	930	1071	786	1494	804	469	640	506	707	821	731	917	1274	614	1137	633	1543	874	486	724	395	763	1947	3923	3210	1876	2012	2848	2008	2978	531	920	729	327	275	1274	936	996	891	724	1418	933
50	661	1616	855	480	269	1330	1122	1102	1034	859	1478	680	567	578	495	710	917	732	924	1086	510	989	465	1601	743	501	587	441	618	2335	4045	2880	1704	2137	2941	2209	2927	522	979	614	346	251	1280	1049	880	1044	953	1612	860
51	667	1508	933	384	225	1290	997	1031	1117	829	1498	797	401	471	410	764	656	669	1000	1403	570	1127	588	1485	856	447	600	495	721	2188	3748	3115	1634	2263	2924	2016	3461	595	901	686	350	232	1238	804	861	1005	816	1487	719
52	615	1622	910	426	214	1365	1033	1031	1141	762	1699	770	568	511	355	668	588	595	875	1322	613	1161	658	1522	863	533	613	429	673	2258	3902	3333	1674	2143	3176	2260	3168	658	992	708	324	167	1153	972	924	912	674	1512	716
53	590	1544	890	352	212	1504	1063	1051	1043	752	1517	793	564	634	366	630	701	577	1066	1355	709	1104	610	1290	821	548	474	450	726	2387	3863	3460	1870	2554	2823	2227	3205	558	915	694	308	167	1463	814	920	1026	753	1486	755
54	566	1768	949	351	191	1292	956	1075	999	789	1546	660	518	618	522	605	897	870	951	1300	739	1079	676	1413	834	519	732	515	689	2175	3851	3216	1722	1994	3003	2124	3221	592	1013	746	306	259	1367	840	915	894	812	1410	863
55	597	1681	934	373	286	1185	1090	1066	1096	995	1623	794	505	530	480	681	549	855	916	1087	687	1085	583	1527	818	526	604	573	839	2263	3676	3373	1742	2233	2842	2245	3134	562	864	665	435	197	1329	929	811	1000	772	1431	720
56	640	1507	974	425	192	1345	1048	1118	1116	776	1656	724	470	499	504	726	716	710	1001	1204	571	1085	684	1489	801	430	605	420	670	2174	3978	3248	1960	1961	2960	1983	3013	651	890	677	392	313	1369	961	1005	838	792	1461	816
57	554	1560	838	371	239	1430	1015	954	1184	851	1434	795	549	537	480	724	825	437	1028	1470	645	1120	613	1564	839	474	592	443	610	2237	3734	3315	2024	2702	2805	2010	3007	576	973	728	318	300	1341	858	934	1015	801	1512	762
58	588	1546	810	164	163	1380	1037	1022	1090	883	1646	787	472	585	419	769	823	475	975	1407	742	1115	676	1517	877	479	609	514	628	2099	3781	3294	1883	1900	3088	2248	3137	614	891	693	258	195	1174	900	881	1030	740	1509	944
59	711	1609	867	347	247	1225	982	1155	1153	795	1411	877	571	647	434	699	771	595	917	1458	855	1170	610	1551	803	526	608	404	696	2228	3860	3193	2001	2136	2953	2081	3018	523	904	806	266	240	1288	833	777	1034	958	1389	846
60	747	1516	940	479	345	1378	935	971	1131	849	1458	789	572	618	434	571	779	619	928	1474	826	1195	533	1507	852	565	576	494	768	1899	4178	3068	1763	2342	3013	2263	3037	526	1062	734	206	187	1186	914	595	941	868	1434	864
61	660	1387	916	385	222	1164	1024	804	1108	806	1620	907	530	646	505	628	854	913	805	1337	550	1011	650	1577	816	607	634	475	681	2089	3939	3158	1904	2302	3022	2120	3123	629	960	700	321	144	1433	1029	900	1012	718	1478	889
62	646	1534	930	357	196	1337	1042	971	1172	848	1574	705	579	571	453	717	885	743	1045	1345	779	972	594	1519	801	561	632	448	669	2196	4277	3279	1794	1975	3071	2322	3044	643	1010	681	321	296	1351	869	806	1059	770	1420	814
63	582	1679	986	390	177	1298	1041	901	1025	783	1436	803	504	592	447	659	803	839	946	1337	591	1055	664	1350	824	572	656	497	787	2327	3925	3317	1736	2386	2970	2182	3198	573	882	634	351	189	1305	844	956	854	706	1496	790
64	648	1472	811	382	222	1148	1087	1014	1042	785	1468	812	541	573	404	807	920	725	1017	1477	668	1078	566	1514	756	483	587	575	707	2286	3707	3438	1799	2051	3077	2097	2970	567	1086	751	358	253	1224	835	955	1016	655	1519	733
65	685	1571	910	411	287	1227	978	945	969	819	1500	793	502	752	426	831	655	768	1041	1400	732	1088	769	1741	873	581	677	469	725	2289	3886	3123	1732	2316	2760	2178	3104	611	834	647	332	161	1343	870	897	1000	845	1473	876
66	612	1513	920	318	124	1294	886	1122	1115	792	1462	729	407	534	437	690	766	557	869	1306	558	1019	742	1409	762	458	632	508	714	2190	3998	3347	1856	2093	3088	2115	3010	633	988	597	441	208	1424	912	807	890	685	1312	852
67	577	1453	871	388	358	1229	1076	657	1107	877	1382	824	534	583	450	633	674	582	845	1449	702	1139	616	1403	776	590	594	376	752	2277	4038	3214	1740	2130	2849	2044	3008	561	925	761	351	197	1260	619	622	929	839	1617	792
68	589	1631	809	443	234	1373	1155	1164	1122	860	1524	739	440	463	470	770	769	754	1020	1309	739	998	609	1312	809	525	468	394	686	2299	3818	3067	1558	1894	3003	1955	3110	569	1038	673	256	235	1085	894	482	961	928	1473	848
69	568	1532	941	398	161	1213	1163	1014	1135	823	1488	829	564	566	575	736	879	737	1017	1412	656	1073	706	1486	844	531	602	351	738	2312	4210	3320	1879	2177	2899	2115	3228	678	941	729	322	176	1160	916	1043	1006	768	1424	795
70	536	1613	821	420	301	1400	994	982	1011	782	1514	690	521	619	460	640	857	886	1027	1043	624	1109	589	1295	941	610	602	431	735	2065	4225	2890	1998	2105	3033	2051	2992	476	846	712	366	257	1254	1075	798	983	859	1338	813
71	576	1573	820	348	151	1385	1110	974	1150	873	1439	813	461	666	480	643	919	395	958	1352	657	1084	656	1350	909	526	704	521	759	2245	4339	3327	1869	2064	3026	2131	3098	586	908	706	307	213	1343	962	969	965	877	1323	826
72	642	1525	804	418	134	1125	1050	999	1098	783	1477	804	629	682	580	690	919	615	999	1301	740	1062	611	1645	758	462	602	371	694	2326	3416	3095	1746	2069	3062	2013	3078	532	961	635	296	289	1283	989	745	1082	708	1276	744
73	624	1423	829	430	232	1317	965	926	1049	753	1391	822	503	579	438	650	820	691	926	1349	477	1039	657	1635	747	550	565	475	743	2259	4046	3096	1557	2080	2997	1899	3049	482	954	754	431	210	1229	855	833	975	724	1383	860
74	626	1491	982	379	306	1072	981	1055	1031	823	1457	803	400	508	457	603	928	805	951	1140	817	1024	639	1473	850	472	565	405	730	2234	3879	3092	1750	2028	2780	2272	3123	508	968	682	378	166	1318	810	1043	1018	783	1508	886
75	620	1482	767	411	348	1203	1075	1076	1002	802	1473	753	459	564	456	596	588	893	1015	1438	821	1028	643	1636	765	563	623	528	696	2090	4134	3197	1712	2178	2815	2255	3107	543	844	703	315	209	1223	923	907	932	737	1516	800
76	594	1436	888	390	249	1052	945	952	1044	714	1520	786	566	609	384	718	794	862	1016	1383	844	1022	630	1523	844	438	595	444	649	2327	3906	3132	2073	2313	3105	2143	2966	565	895	668	296	200	1142	851	830	984	860	1472	871
77	615	1495	789	443	259	1312	1021	1065	1097	856	1491	703	472	701	479	722	885	662	1069	1464	764	1054	569	1553	831	439	549	418	557	2215	3776	3178	1626	2089	2933	2087	2893	692	945	727	260	147	1236	874	1031	1004	744	1380	868
78	609	1543	891	411	134	1370	1117	874	1247	647	1446	732	535	538	564	654	763	493	1013	1141	551	1089	746	1454	772	464	572	480	714	2168	4021	3182	2030	2297	3010	2028	3170	497	798	790	275	176	1222	855	872	941	989	1426	802
79	562	1419	925	561	205	1304	1022	1068	1074	856	1519	713	451	651	418	702	735	451	1028	1271	769	964	679	1432	829	531	489	428	590	2422	3786	3071	1573	1989	2797	2149	2459	520	917	694	327	221	1155	793	926	859	884	1598	779
80	675	1409	758	416	272	1259	996	1027	1165	742	1416	792	535	577	414	722	747	660	957	1126	620	986	675	1590	794	507	550	414	601	2419	3399	3103	1947	2244	2960	2050	3226	447	980	721	303	309	1265	997	796	922	1050	1531	847
81	600	1423	866	401	240	1431	1009	1062	1114	758	1427	728	483	526	641	720	806	574	1062	1437	768	1078	660	1670	828	457	645	510	634	2006	4203	3307	1702	2143	2769	2017	3259	524	933	785	245	169	1195	947	964	943	816	1488	861
82	591	1410	810	282	200	1297	980	939	956	798	1498	773	435	465	455	715	765	544	1045	1350	749	1079	613	1516	848	568	572	556	637	2239	4242	3076	1689	2554	2907	2074	3036	607	1034	663	335	273	1323	785	927	995	774	1409	816
83	632	1563	892	459	320	1349	1120	1070	1124	810	1550	819	487	537	427	712	784	654	931	1308	662	1106	635	1407	861	527	562	431	595	2237	4291	2993	1916	1961	2748	2032	2836	668	983	647	338	207	1271	819	730	846	812	1639	756
84	593	1418	796	370	256	1358	1084	1085	1016	918	1425	705	508	607	428	752	615	764	1017	1340	573	983	670	1638	778	521	618	458	754	2182	3977	3162	1634	2310	2745	1931	3060	610	925	638	228	172	1358	903	893	1037	746	1441	867
85	514	1272	784	407	208	1256	1058	953	1014	858	1607	657	467	540	338	726	731	876	939	1036	608	1004	639	1442	864	583	629	481	618	2299	3877	3184	1816	2094	3114	1969	3218	493	945	667	367	295	1190	1022	985	927	827	1379	774
86	758	1492	780	386	216	1259	1001	1037	1092	808	1456	745	480	563	466	594	736	809	928	1408	462	1055	702	1348	854	540	485	446	693	2013	4056	3217	1824	2084	2846	2099	3171	544	1051	705	301	158	1362	848	841	1054	811	1499	829
87	619	1432	888	345	188	1283	990	1039	1069	851	1485	788	473	632	324	815	726	651	983	1510	929	1003	645	1319	843	489	658	414	585	2335	3978	3093	1901	2108	2903	2201	3174	568	804	614	278	226	1291	932	832	1041	886	1584	895
88	585	1472	797	481	279	1387	1037	1023	987	822	1526	697	470	496	383	606	750	868	925	1313	642	1081	579	1440	800	554	555	511	710	2282	3726	3202	1806	2235	2763	2009	3152	619	837	614	340	158	1291	933	992	936	831	1581	814
89	612	1470	826	392	213	1324	1062	983	1107	795	1542	784	514	622	470	694	718	602	954	1336	651	1147	589	1526	904	462	572	508	702	2487	3726	3288	1857	2228	2867	2052	3009	606	1001	784	337	185	1247	880	917	1106	907	1484	860
90	527	1622	803	415	239	1165	1096	1028	1087	730	1434	759	517	562	433	732	638	433	924	1394	807	1121	635	1471	797	464	665	408	714	2065	4071	3083	1783	2042	3022	1960	3255	655	1001	681	412	136	1236	870	612	990	842	1513	839
91	567	1389	849	435	268	1336	989	948	1146	758	1327	843	524	675	477	705	855	772	969	1261	708	1075	570	1487	727	532	666	472	629	2389	3435	3187	1723	2281	3113	2119	3191	535	967	721	310	139	1398	876	809	939	810	1372	764
92	555	1530	995	413	261	1397	987	1012	966	836	1590	791	313	612	415	620	595	835	911	1376	672	1049	567	1464	865	489	617	473	671	2065	4138	3165	1686	2211	3214	2066	3223	546	1064	737	352	242	1339	969	965	1062	834	1492	796
93	669	1551	799	357	268	1542	1025	1001	1232	731	1400	765	482	589	522	676	665	739	833	1351	600	967	599	1420	828	538	547	560	659	2200	4135	3282	1746	1959	3399	2274	3032	576	1039	751	314	249	1076	1012	1013	908	738	1552	807
94	743	1439	861	402	271	1254	991	1100	1003	821	1442	678	433	518	484	666	592	720	982	1606	793	1087	698	1534	814	492	708	459	653	2189	4135	3134	1979	2071	3293	2196	3236	552	943	805	312	194	1286	874	781	910	716	1565	830
95	451	1454	931	477	190	1276	993	943	944	766	1479	905	526	595	375	727	798	855	854	1240	859	994	629	1406	932	480	552	446	653	2112	3855	3297	2071	2137	3361	2068	2941	453	994	718	477	180	1238	895	693	1016	631	1487	846
96	633	1340	703	391	195	1367	1027	1037	1134	854	1494	857	545	526	507	691	465	596	1076	1170	592	1044	602	1608	857	555	598	498	599	2212	4048	3126	1876	1964	2972	2287	3158	459	891	697	314	204	1040	908	1000	988	818	1591	804
97	607	1409	768	377	209	1432	1026	525	1182	885	1410	811	521	507	455	742	910	451	946	1304	767	1091	754	1522	851	519	570	524	637	2111	4087	3001	1936	2162	3560	2130	3065	699	980	628	233	60	1264	942	1081	1014	642	1483	812
98	588	1365	788	389	326	1332	986	1026	1194	808	1531	746	485	550	544	807	852	472	1004	1364	550	1049	652	1687	828	454	667	492	719	2342	3892	3261	2015	2000	3185	1949	2830	515	915	569	329	172	1249	810	1035	1063	831	1463	833
99	585	1331	781	465	207	1380	1115	1069	1012	743	1578	740	441	602	461	811	759	772	1077	1483	661	1069	594	1370	787	534	535	514	677	2398	3978	3101	1877	2133	3429	1949	3091	618	919	664	367	224	1307	974	913	1024	851	1419	919
100	600	1339	809	434	277	1205	1013	1048	1081	878	1438	725	522	528	502	619	618	805	974	1044	734	1110	523	1466	850	534	712	511	678	2318	4119	3301	1677	2241	3217	2073	3280	550	999	730	384	285	1302	942	632	926	692	1478	727
101	607	1415	929	415	160	1401	1056	1006	1077	802	1492	785	576	576	467	660	714	732	954	1323	767	1044	625	1494	860	566	584	530	724	2061	4201	3096	1788	2050	3154	2267	2951	660	1066	642	398	188	1316	887	972	992	751	1528	858
102	691	1616	856	600	392	1360	1113	1119	1060	785	1652	848	606	648	515	680	952	532	1096	1507	636	1173	670	1764	830	566	642	587	631	2369	4353	3511	1920	2276	3289	2330	3028	548	1035	682	488	250	1247	803	954	1008	695	1685	897
103	891	1781	870	676	538	1266	1267	976	1050	904	1832	996	745	488	710	705	901	591	1266	1513	683	1016	733	1671	1146	773	692	652	575	2022	4160	3334	1904	1867	3543	2514	3064	740	978	726	510	282	1313	962	876	954	672	1745	1005
104	1053	2156	916	691	548	1389	1305	1052	1052	783	2229	1306	974	670	797	699	1419	637	1623	1764	568	1038	576	2113	1403	962	745	831	695	2224	4397	3712	1910	2206	3402	3266	3104	806	1024	683	487	288	1210	969	891	1073	743	2026	1387
105	1152	2481	841	914	466	1351	1555	1103	1221	816	2474	1655	1197	809	1083	705	1916	874	1924	1919	793	1108	711	2314	1596	992	728	932	605	2454	5232	4199	1975	2260	3816	3872	3096	974	1215	673	869	360	1448	922	993	952	768	2520	1630
106	1326	2561	988	1059	642	1426	1385	821	1121	896	2610	1970	1135	761	1073	689	1493	1098	2179	2145	503	1056	525	2768	1767	1060	797	944	713	2523	5134	4476	2193	2489	4244	4490	2943	1051	1197	805	773	574	1395	990	1102	1035	1031	2469	1965
107	1386	2845	1129	1112	528	1449	1629	1174	1152	768	2777	2081	1184	872	1189	714	1598	972	2442	2026	750	1045	569	2888	1880	1047	861	1087	678	2701	5292	4693	2105	2109	3999	4894	3029	1124	1306	662	645	398	1360	768	1154	1161	844	2824	2173
108	1301	3158	1195	1170	626	1586	1640	1166	1223	879	2743	2028	1361	790	1216	698	1521	1001	2521	1998	563	1056	655	2848	1857	1093	913	1174	653	2669	6130	4545	1889	2279	4126	5203	2980	1081	1564	860	1016	508	1445	828	874	1111	793	3015	2198
109	1630	3483	1198	1081	639	1705	1195	1249	1127	832	2922	2128	1284	711	1117	764	1999	999	2958	1956	652	1064	699	3099	2267	1176	921	1106	607	2783	6379	4553	1607	2146	4108	5307	3019	1189	1575	722	1039	476	1247	793	868	1200	818	2971	2365
110	1600	3320	1200	1122	650	1831	1730	1281	1029	751	2984	2390	1414	873	1345	698	1531	1116	3050	2049	638	1084	567	2636	2059	1121	885	1248	688	2846	6462	4789	1901	2302	4396	5499	2953	1368	1494	816	1111	518	1565	1047	1038	1161	719	2952	2254
111	1619	3392	1344	1254	690	1656	1625	1288	1131	783	2957	2228	1480	781	1407	669	1836	980	3198	2011	723	1140	509	2815	2053	1149	749	1279	707	2791	6589	4795	2263	1875	4440	5729	3115	1294	1575	692	981	514	1625	1158	961	1219	709	3059	2411
112	1586	3720	1309	1140	646	1691	1621	1421	1292	734	3142	2282	1407	803	1488	762	1651	1127	3197	2018	662	1027	598	3090	2249	1098	818	1422	663	2528	6604	4418	2096	2137	4298	5999	3032	1252	1657	727	825	514	1616	1099	836	1204	956	3336	2450
113	1454	3736	1212	1162	675	1677	1712	1325	1285	964	3797	2492	1305	880	1431	707	2263	1265	3284	2167	469	1013	582	3184	2197	1069	917	1191	678	2851	6931	4857	2277	2335	4640	5914	3175	1404	1560	924	993	588	1751	1221	1249	1132	774	3273	2525
114	1585	3745	1461	1198	747	1832	1340	1331	1248	950	3331	2412	1346	887	1179	861	1701	1338	3225	2143	438	1102	552	2735	2498	1150	872	1219	593	2947	6948	4968	2195	1922	4120	6158	3003	1401	1784	886	1152	432	1538	927	1395	1150	657	3245	2539
115	1509	3908	1335	1271	707	1769	1810	1467	1230	794	3419	2524	1562	862	1351	721	2150	1255	3217	2266	943	1134	596	2972	2410	1265	850	1334	534	2962	7188	4866	2055	1904	4449	6154	3091	1267	1751	837	861	684	1498	961	1341	1144	763	3444	2662
116	1536	3978	1357	1209	696	1822	1650	1387	1346	868	3362	2465	1466	802	1278	733	2384	1225	3216	2313	645	1199	736	3087	2414	1169	945	1258	550	2970	6710	5079	2306	2463	4561	6224	3032	1232	1776	849	862	588	1373	1131	1378	1210	784	3308	2600
117	1563	3868	1412	1162	713	1709	1808	1415	1190	819	3600	2675	1446	825	1457	689	2306	1270	3259	2295	590	1133	623	3386	2602	1137	894	1366	562	2975	6703	5042	2363	2133	4467	6027	2870	1277	2023	847	922	622	1681	1250	1246	1331	995	3219	2700
118	1686	4027	1608	1129	694	1827	1640	943	1268	966	3336	2707	1511	860	1419	625	2180	1237	3349	2337	655	1261	641	3059	2465	1220	900	1300	593	3024	7007	4900	2164	2153	4620	6436	2849	1439	1941	841	1013	534	1660	1259	1319	1203	902	3467	2683
119	1492	4010	1601	1248	661	1906	1175	1370	1202	842	3629	2630	1464	675	1478	626	2123	1396	3252	2210	900	1207	563	3168	2561	1349	881	1355	652	3162	6915	5177	2159	2296	4762	6495	2923	1268	2020	909	1034	570	1524	1355	1158	1380	913	3578	2778
120	1473	4058	1513	1214	735	1896	1694	1422	1167	784	3657	2863	1604	958	1447	648	2380	1259	3329	2310	805	1178	594	3533	2648	1284	865	1257	665	3247	7497	5148	2322	2037	4799	6273	3071	1261	1893	995	1158	601	1754	1193	913	1316	1006	3596	2687
121	1666	4120	1567	1207	750	1988	1906	1379	1152	785	3376	2803	1611	721	1453	611	2397	1279	3210	2343	713	1216	767	3145	2568	1248	872	1230	615	3189	6863	5335	2245	2099	5176	6605	3042	1521	1978	1023	894	628	1536	1035	1305	1033	789	3808	2875
122	1567	3947	1572	1214	702	1865	1786	1257	1299	867	3724	2828	1582	902	1391	721	2448	1371	3206	2374	715	1168	517	3192	2501	1260	967	1361	709	3097	6865	5112	2297	2099	4948	6574	2806	1496	2005	912	927	612	1575	992	886	1128	718	3587	2811
123	1470	3980	1602	1141	706	1746	1855	1393	1210	767	3591	2849	1471	774	1398	698	2685	1463	3336	2356	789	1213	757	3634	2726	1245	909	1319	639	3021	6757	4850	2354	2366	4924	6386	2712	1456	2045	874	978	712	1765	956	1296	1244	782	3421	2708
124	1492	3990	1437	1265	793	1897	1759	983	1215	871	3698	2813	1535	783	1476	702	2554	1330	3150	2269	784	1070	658	3102	2754	1289	924	1358	591	3236	6877	5198	2286	2385	4963	6312	2844	1490	2088	1072	1133	523	1712	1095	1296	1192	877	3661	2726
125	1554	4104	1608	1296	736	1816	1415	945	1210	769	3643	2742	1439	930	1416	729	2475	1485	3283	2367	584	1175	675	3244	2609	1376	883	1295	628	3024	6850	5257	2169	2130	5225	6486	2592	1519	2047	893	961	552	1677	1278	1365	1262	832	3524	2855
126	1612	4094	1734	1146	683	1997	1722	1007	1205	791	4264	2805	1396	860	1579	780	2399	1378	3404	2328	538	1195	566	3480	2795	1129	890	1365	619	3180	6912	5408	2303	2670	4897	6453	3094	1538	2192	973	896	464	1668	951	1311	1304	895	3571	2896
127	1596	4130	1623	1240	754	1925	1199	825	1040	774	3894	2887	1544	1009	1460	824	2526	1477	3240	2318	636	1241	610	3708	2708	1277	992	1262	695	2909	6970	5231	2367	2007	4663	6021	2997	1521	2194	988	932	511	1721	1377	1447	1172	932	3607	2791
128	1674	4144	1602	1156	702	1943	1871	1550	1228	754	3835	2860	1589	953	1482	804	2433	1416	3460	2420	854	1177	667	4005	2766	1266	967	1361	707	3123	7163	5433	2196	2214	4878	6629	3186	1422	2241	947	1075	530	1788	1262	1397	1215	744	3627	3039
129	1520	4035	1404	1175	679	1846	1665	1308	1244	882	3948	2985	1625	991	1551	754	2349	1464	3301	2451	682	1186	661	3368	2686	1323	885	1329	601	3267	7845	5276	2235	2189	4793	6477	2987	1560	2266	1050	1094	576	1905	1031	1114	1242	762	3492	2646
130	1573	4051	1421	1069	655	1861	1854	981	1292	796	3901	3045	1432	829	1409	705	2361	1460	3223	2383	744	1129	630	4048	2717	1342	1051	1360	618	2907	7162	5550	2221	2570	4784	6646	2570	1454	2458	781	1121	605	1799	1264	1416	1197	727	3786	2833
131	1443	3989	1387	909	676	1847	1973	908	1219	805	4071	2964	1503	1017	1474	692	2295	1479	3150	2354	450	1258	667	3443	2745	1374	945	1305	720	3000	6956	5523	2209	2213	4710	6390	3044	1379	2253	925	989	504	1792	1276	1315	1033	837	3660	2798
132	1560	3975	1495	1105	810	1980	1975	1084	1132	877	4018	2822	1461	1000	1444	659	2518	1538	3087	2531	695	1081	641	3395	2800	1378	975	1279	698	2956	7321	5413	2297	2226	4889	6495	3286	1414	2200	1060	1092	588	1744	1304	1547	1358	784	3818	2618
133	1446	4057	1541	1287	660	1942	2046	1538	1191	778	4116	2951	1490	788	1395	708	2348	1372	3053	2463	754	1145	627	3850	2632	1308	908	1350	695	3250	7201	5210	2198	2123	4665	6607	3261	1439	2345	1029	1156	619	1751	1251	1286	1289	737	4053	2763
134	1581	3980	1509	1111	761	1814	1802	1048	1288	806	4150	2926	1522	882	1491	630	2321	1373	3093	2436	791	1218	685	3344	2827	1178	1005	1289	618	3074	7256	5451	2128	2598	4886	6423	3150	1364	2286	1088	1127	568	1834	1196	1369	1295	707	3817	2880
135	1551	3932	1348	1017	602	1839	1870	1522	1191	785	3935	3027	1542	973	1366	710	2531	1508	3007	2411	970	1128	644	3396	2829	1364	979	1271	600	3054	7068	5406	2128	2129	5074	6446	3039	1488	2396	984	893	605	1945	1098	1384	1228	825	3572	2782
136	1457	3951	1499	1190	523	1891	1857	962	1324	843	4076	2913	1515	1017	1522	827	2715	1339	3218	2518	496	1150	623	3516	2785	1294	1157	1410	733	2963	7171	5479	2418	2428	4800	6471	3084	1408	2462	1025	1077	632	2006	1010	1257	1344	1007	3821	2931
137	1438	4028	1565	1085	752	1938	1998	1673	1180	932	4045	3023	1455	1111	1495	691	2339	1537	3090	2138	505	1080	660	3475	2850	1405	1074	1348	564	3022	7377	5578	2106	2470	4560	6279	3145	1516	2399	873	1122	561	1891	1099	1368	1240	791	3740	2832
138	1457	3892	1523	1025	709	2188	2198	1027	1170	724	4313	3050	1505	1153	1471	747	2571	1535	3091	2505	636	1150	741	3726	2842	1244	1120	1275	568	3146	7771	5462	2197	2070	4658	6241	3079	1367	2336	981	970	596	1769	1331	1058	1147	753	3896	2988
139	1365	3973	1427	1113	635	1975	2134	1394	1144	727	4168	3287	1529	1131	1584	699	2420	1368	2721	2424	750	1286	727	3885	2701	1280	1080	1287	607	3102	7194	5281	2144	2164	4906	6252	3271	1394	2474	1008	1121	572	1844	1008	1114	1226	772	3771	2871
140	1501	3751	1555	1078	628	1979	1928	1209	1334	815	4281	3050	1469	1040	1365	773	2427	1677	3061	2694	618	1154	544	3592	2766	1337	1062	1259	665	3161	7697	5404	2158	2326	4711	6269	3316	1375	2235	971	1126	565	1717	1092	1348	1203	905	4224	2949
141	1561	3935	1589	1110	667	2029	1952	1051	1324	867	4298	3151	1427	1001	1434	597	2300	1320	2888	2571	741	1221	688	3425	2782	1292	1091	1330	600	2945	6953	5650	2430	2309	4789	6453	3197	1448	2343	1031	1054	541	1898	1487	1476	1244	934	4399	2658
142	1537	4027	1605	1174	713	2023	2016	1217	1326	861	4286	3014	1581	1099	1304	562	2387	1428	3122	2564	690	1282	740	3788	2918	1313	1194	1335	640	3176	7542	5455	2300	2220	4702	6525	2984	1291	2441	933	1142	468	1733	1372	1417	1355	780	4327	2732
143	1359	4046	1771	1055	644	1914	2088	1592	1392	813	4124	3066	1443	1090	1352	696	2486	1473	3143	2304	662	1165	625	4028	2861	1251	1080	1306	583	3208	7409	5537	1853	2296	4740	6054	3000	1320	2479	932	898	485	1849	1230	1137	1331	785	3823	2741
144	1499	3919	1807	1076	640	2172	1856	1579	1288	756	4272	2994	1474	1060	1425	661	2382	1655	2913	2500	610	1165	713	3631	2742	1381	1082	1276	686	3154	7544	5829	2234	2261	5006	6280	3154	1365	2381	960	847	456	1818	1371	1397	1248	756	4042	2783
145	1414	3810	1684	1027	719	2089	1979	1127	1270	772	4059	2808	1401	1040	1380	716	2433	1538	3079	2686	624	1166	558	4020	2710	1370	1192	1191	563	3383	7500	5628	2113	2724	4629	6453	3220	1404	2629	1099	1035	485	1955	1243	1430	1198	842	4191	2849
146	1403	4160	1714	1153	694	2032	1949	1539	1264	747	4201	2948	1510	862	1377	684	2438	1549	3081	2494	867	1193	579	3912	2625	1289	1152	1262	646	3054	7446	5621	2104	2409	4602	6521	3114	1314	2505	981	943	499	2047	1347	1140	1400	741	4220	2870
147	1588	3913	1740	1094	664	2003	1977	1288	1273	826	4039	3005	1459	1074	1452	647	2488	1694	2930	2604	773	1050	653	3673	2778	1322	989	1298	590	3448	7587	5564	2231	2468	4752	6582	2871	1383	2404	1102	807	513	2055	1123	1190	1225	976	4199	2983
148	1545	3917	1622	1085	657	2096	1876	1167	1266	828	4218	3058	1421	1230	1364	602	2494	1398	2905	2497	871	1011	636	3544	2817	1375	1230	1212	671	3278	7463	5186	2183	2272	4799	6006	3055	1398	2527	1106	1015	481	2086	1371	1428	1199	667	4103	2841
149	1456	3911	1636	1050	660	2067	1934	1169	1138	852	4462	2961	1461	1293	1323	784	2319	1431	2928	2485	818	1282	567	4027	2730	1204	1258	1271	613	3406	7438	5449	2069	2104	4935	6089	2833	1340	2467	1125	1047	523	1961	1127	1325	1367	925	4135	2680
150	1413	3658	1741	1050	574	2100	1910	1432	1338	849	4306	3064	1350	1173	1386	655	2489	1561	2911	2510	750	1151	651	3618	2856	1270	1175	1241	696	3294	7202	5267	2084	2218	4788	6227	3003	1401	2609	1196	1150	589	2065	1171	1461	1223	809	4181	2735
151	1413	4031	1776	1130	577	2010	1971	1617	1174	789	4432	3003	1455	1167	1311	658	2495	1573	2944	2616	758	1119	530	3799	2772	1280	967	1165	702	3360	7340	5605	2316	2096	4565	5984	3088	1280	2603	1077	1042	546	2114	1448	890	1329	799	4327	2833
152	1455	3901	1615	1030	717	2131	1784	1201	1197	782	4319	2936	1372	1128	1345	683	2398	1600	2682	2460	687	1302	674	3866	2806	1326	1133	1207	646	3171	7250	5413	2187	2595	4877	5865	3217	1351	2756	1052	940	306	2032	1149	1100	1310	821	4126	2857
153	1380	3780	1676	1079	664	2267	1882	1162	1193	881	4384	2981	1374	1375	1358	768	2249	1571	2825	2570	571	942	694	3904	2866	1297	1145	1332	647	3263	7284	5333	2020	2567	4649	6150	3058	1200	2766	1155	820	452	1968	1096	1527	1220	899	4406	2813
154	1402	3803	1729	953	557	2214	1640	1200	1355	865	4587	2938	1414	1184	1212	718	2418	1568	2772	2730	753	1214	573	3750	2666	1275	1080	1174	715	3459	7653	5412	2118	2118	4725	6293	3127	1396	2455	1055	941	625	2007	1228	1255	1167	761	4382	2754
155	1423	3821	1704	1026	602	2133	1962	1206	1294	868	4299	2936	1574	1236	1314	639	2549	1472	2783	2578	751	1187	675	3679	2793	1241	1188	1253	667	3361	7285	5341	2070	2079	4730	6134	3048	1312	2541	1113	957	472	2011	1399	1426	1403	863	4372	2748
156	1508	3850	1556	1059	531	2281	1864	1649	1184	892	4232	2913	1467	1177	1304	708	2405	1493	2668	2602	567	1168	685	3817	2813	1200	997	1105	604	3392	6884	5644	2233	2202	4988	6340	3068	1398	2628	1029	954	597	2137	1361	1380	1199	695	4444	2930
157	1349	3677	1732	923	592	2404	1886	1111	1254	832	4459	2922	1497	1257	1348	774	2278	1388	2776	2578	781	1328	575	4263	2696	1304	1150	1221	700	3257	7155	5502	2154	2170	4503	6172	2961	1362	2744	1006	873	481	2114	1589	1143	1142	792	4198	2717
158	1362	4008	1785	1035	651	2375	1993	1181	1179	922	4309	3020	1440	1228	1360	696	2483	1589	2634	2462	778	1236	732	3710	2853	1226	1175	1337	624	3154	7395	5212	2395	2353	5033	6320	3258	1325	2701	1121	820	469	2069	1112	1224	1240	668	4398	2673
159	1464	3700	1753	1004	536	2392	1852	1173	1114	905	4192	2959	1438	1006	1385	737	2306	1448	2498	2634	577	1234	703	3687	2785	1321	1167	1216	708	3105	7079	5292	2052	2214	4824	6045	2969	1291	2778	1049	1019	530	2014	1144	1126	1285	939	4413	2809
160	1408	3701	1596	912	660	2475	1946	1105	1213	706	4382	2879	1469	1274	1202	729	2418	1315	2633	2470	753	1274	704	3863	2618	1162	1113	1164	560	3185	7089	5547	2232	2260	4959	6952	3225	1252	2625	1003	1047	535	1987	944	1436	1165	710	4225	2711
161	1502	3755	1676	1062	601	2312	1828	1172	1245	838	4442	2955	1381	1014	1397	774	2612	1682	2951	2408	588	1028	607	3661	2554	1254	1277	1100	576	3362	6751	5744	2185	2305	4616	6835	3156	1303	2686	1083	863	598	1665	1060	1495	1280	711	4479	2791
162	1321	3655	1741	1038	598	2300	1807	1240	1199	732	4671	2943	1413	1150	1328	789	2333	1552	2421	2473	642	1243	615	3739	2731	1196	1225	1251	703	3362	6802	5321	2190	2156	4653	7116	3177	1381	2803	1051	921	461	1927	1439	1259	1341	781	4456	2905
163	1514	3769	1625	1017	442	2464	1754	1322	1210	757	4391	2999	1411	1198	1327	751	2128	1478	2606	2547	625	1188	600	3713	2847	1270	1096	1156	610	3266	6917	5593	2197	2455	4886	6888	3071	1207	2721	1060	978	467	2015	1493	1418	1271	903	4233	2660
164	1410	3771	1760	920	478	1955	1996	1280	1316	881	4441	2891	1410	1184	1275	731	2140	1530	2843	2606	888	1210	619	3869	2509	1305	1156	1284	559	3092	7139	5500	2138	2092	4822	6856	3220	1205	2949	986	1028	488	1938	1088	1216	1363	877	4327	2871
165	1453	3845	1751	943	459	2333	1762	1221	1249	762	5039	2824	1286	1189	1343	777	2222	1515	2714	2591	660	1144	583	3765	2724	1212	1122	1132	727	3147	7068	5418	1738	2450	4736	6751	3327	1393	2727	1082	955	549	1981	1411	1475	1197	803	4542	2816
166	1486	3765	1657	1001	489	2374	1833	1191	1198	816	4395	2833	1413	1104	1394	697	2540	1284	2881	2551	829	1318	666	4260	2982	1213	1372	1247	615	3187	6864	5645	2043	2565	4576	7166	3167	1394	2636	1128	898	509	2056	1464	1239	1387	964	4089	2743
167	1326	3721	1666	1053	539	2354	1824	1167	1128	740	4255	2804	1334	1167	1355	766	2433	1531	2593	2600	726	1132	742	3773	2737	1211	1193	1239	549	3121	7071	5541	2224	2486	4636	7062	3126	1202	2713	1161	995	477	2140	1048	1603	1306	813	4590	2814
168	1450	3874	1671	924	598	1949	1751	1165	1214	772	5038	2656	1415	1205	1311	757	2424	1433	2813	2686	801	1113	724	3909	2776	1139	1192	1154	664	3381	7107	5391	2066	2181	4867	7110	2650	1287	2927	1144	863	466	2058	1442	1200	1295	695	4516	2451
169	1499	3808	1454	890	434	2181	1754	1774	1231	772	4367	2796	1487	1222	1292	701	2077	1628	2770	2218	639	1079	663	4493	2725	1302	1252	1207	681	3288	7498	5550	2112	2253	4544	6820	3174	1212	2806	1146	986	644	2073	1442	1223	1271	905	4426	2607
170	1486	3741	1706	965	635	2332	1848	1161	1302	680	4282	2724	1332	1072	1239	850	2285	1386	2457	2602	718	1157	731	3733	2641	1239	1276	1237	719	3424	7139	5620	2037	2399	4695	7069	2866	1099	2961	1063	932	482	2108	1492	1279	1234	832	4558	2635
171	1444	3804	1682	1050	471	2406	1732	1217	1346	807	4363	2694	1441	1223	1192	694	2547	1457	2304	2728	707	1159	723	3892	2590	1254	1232	1111	552	3034	6890	5541	1749	2001	4717	6933	3074	1281	2926	1135	871	531	2041	1473	1564	1268	1013	4513	2735
172	1357	3477	1548	939	600	2239	1597	1285	1110	858	5009	2808	1443	1200	1254	606	2540	1443	2463	2484	599	1158	653	3678	2632	1233	1223	1210	636	3231	6771	5316	2081	2029	4672	6959	3201	1273	2937	1137	910	493	2056	1530	1206	1100	802	4404	2621
173	1304	3827	1660	940	625	2248	1889	1433	1307	684	5192	2854	1431	1157	1269	779	2378	1454	2825	2357	637	1120	603	3808	2565	1150	1200	1225	628	3514	6939	5404	2177	2314	4611	6880	2883	1311	2852	1048	1074	451	2152	1449	1677	1304	829	4449	2649
174	1243	3634	1732	1004	557	2301	1792	1840	1237	700	4933	2846	1390	1174	1340	662	2395	1560	2443	2510	627	1098	631	3851	2729	1186	1204	1133	640	3340	7199	5154	1865	2535	4725	6741	3110	1289	2892	1119	946	468	2151	1412	1718	1221	736	4432	2517
175	1399	3581	1727	948	428	2414	1795	1173	1258	771	5113	2802	1296	1241	1239	666	2389	1314	2694	2286	888	1123	705	3872	2732	1177	1142	1005	610	3290	7036	5512	2341	2437	4690	6483	3044	1305	2929	1092	922	390	2124	1116	1217	1329	810	4410	2590
176	1451	3619	1686	974	502	2294	1631	1242	1236	982	5060	2815	1365	1268	1190	673	2349	1520	2567	2598	652	1011	700	3835	2619	1217	1314	1082	694	3437	7284	5152	2109	1870	4424	6762	2967	1242	2880	1093	933	488	2173	1066	1199	1271	899	4529	2384
177	1350	3732	1680	840	551	2265	1731	1180	1172	836	4923	2676	1269	1105	1239	683	2086	1419	2585	2632	813	1018	643	4024	2804	1146	1302	1185	638	3215	7354	5443	2097	2560	4638	6564	2611	1310	2877	1233	928	482	2099	1115	1465	1265	827	4497	2749
178	1458	3768	1539	809	450	2392	1782	1386	1212	676	5183	2661	1175	1163	1125	754	2136	1387	2340	2474	875	1044	618	3894	2521	1311	1293	1149	638	3265	7207	5280	2038	2326	4602	6870	2883	1223	2901	1113	640	461	2092	1453	1364	1209	893	4375	2479
179	1311	3337	1666	996	402	2156	1776	1312	1264	826	5255	2600	1291	1337	1279	654	2302	1555	2375	2555	716	1094	618	3886	2570	1260	1216	1053	673	3201	7059	5326	2011	2124	4609	6581	2988	1286	2950	1211	846	371	1953	1424	1269	1371	914	4410	2452
180	1250	3722	1700	827	450	2290	1721	1303	1309	910	5106	2750	1227	1100	1258	777	2352	1351	2566	2567	775	1180	561	3980	2619	1288	1316	1117	638	3241	6976	5519	2249	2365	4821	6757	3010	1175	2943	1191	1025	358	2064	1077	936	1226	894	4588	2779
181	1332	3511	1776	975	437	2275	1728	1182	1211	790	5123	2697	1314	1113	1215	575	2181	1551	2623	2667	688	1230	658	4068	2494	1239	1238	1118	651	3323	7069	5111	2056	2244	4691	6553	3140	1193	2988	1232	925	345	1926	1436	1204	1234	969	4532	2541
182	1303	3644	1628	928	457	2182	1629	1241	1272	806	5134	2675	1350	974	1260	678	2245	1435	2476	2637	690	1042	596	3844	2668	1150	1294	1134	572	3309	7062	5320	2337	2203	4745	6741	2562	1208	3077	1296	879	358	1975	1087	1291	1301	773	4202	2782
183	1420	3567	1637	911	570	2245	1756	1283	1237	838	4315	2817	1278	1108	1299	655	2106	1540	2620	2421	481	1232	766	4120	2631	1110	1250	1152	577	3244	6919	5092	2071	2276	4851	6672	2947	1104	2845	1317	948	452	2103	1147	1004	1315	742	4573	2569
184	1426	3610	1824	983	556	2189	1677	1306	1232	801	5221	2743	1308	1124	1215	754	2330	1465	2328	2574	731	1079	537	3904	2702	1256	1454	1131	583	3188	6627	5257	2094	2785	4814	6710	3135	1150	2938	1259	937	600	1795	1442	1283	1324	961	4362	2420
185	1439	3573	1634	844	500	2084	1764	1285	1247	696	4943	2761	1280	1183	1238	716	2350	1404	2334	2491	671	1121	609	4022	2620	1188	1339	1013	630	3213	7060	5333	2091	2246	4946	6455	3173	1179	2939	1174	928	450	2043	1124	1547	1167	817	4336	2495
186	1315	3476	1812	983	659	2258	1776	1221	1277	731	5156	2684	1226	1019	1148	753	2239	1416	2398	2486	660	1202	739	4229	2547	1235	1208	1248	716	3193	6876	5358	2012	2688	4644	6607	2900	1209	3007	1212	788	450	2125	1343	1292	1232	769	4592	2731
187	1393	3627	1662	815	541	2178	1632	1191	1157	737	4849	2564	1292	1023	1140	692	2080	1608	2603	2548	896	1191	693	4123	2656	1053	1218	1117	657	3190	7088	5308	2264	2600	4860	6243	2956	1093	2829	1281	882	535	2077	1449	1261	1294	904	4456	2506
188	1292	3487	1748	882	484	2268	1623	1708	1219	783	5174	2764	1346	1208	1326	654	2273	1444	2506	2407	577	1123	625	3902	2653	1273	1410	1032	632	3132	7188	5343	2321	2842	4763	6397	3114	1248	2954	1198	827	410	2277	1524	1365	1277	637	4140	2652
189	1379	3531	1675	825	404	2212	1688	1388	1140	855	5108	2726	1098	1152	1214	665	2141	1426	2363	2454	628	1016	744	3999	2647	1239	1297	1064	634	3170	6544	5142	2170	2153	5032	6682	3024	1270	2990	1266	850	552	2331	1188	1301	1319	694	4368	2524
190	1246	3422	1763	895	555	2386	1680	1336	1300	761	5004	2743	1335	1303	1104	766	2230	1478	2289	2526	831	951	691	4063	2531	1216	1282	1117	674	3332	6828	5072	2270	2306	4853	6247	3081	1250	3147	1362	736	440	2175	1514	1613	1391	758	4398	2616
191	1438	3354	1782	832	554	2267	1566	1300	1152	769	5028	2676	1363	1165	1114	631	2182	1500	2492	2582	589	1098	660	4099	2636	1112	1348	1006	662	3159	7153	5151	2136	2444	5057	6315	2893	1192	3046	1275	1023	473	2274	1383	1271	1205	789	4334	2593
192	1436	3529	1683	910	599	2299	1555	1198	1195	806	5253	2537	1328	1300	1295	663	2008	1657	2468	2606	735	1055	583	4131	2452	1085	1213	1267	697	3099	7096	5287	2036	2310	4633	6438	2979	1170	2887	1303	876	462	2424	1483	1534	1392	733	4399	2501
193	1299	3418	1718	819	475	2240	1678	1594	1119	769	5040	2594	1360	1254	1115	802	2209	1517	2386	2427	386	1096	585	3749	2496	1114	1332	1178	709	3132	6948	5018	2172	2640	4522	6155	2918	1151	3069	1265	832	482	2269	1429	1492	1297	794	4391	2480
194	1308	3556	1681	921	546	2179	1777	1180	1214	765	4964	2700	1401	1288	1140	809	2241	1486	2453	2446	830	1097	621	4022	2531	1082	1358	1193	654	3361	6901	5258	2085	2261	4787	6491	3346	1067	3050	1418	899	490	2336	1666	1255	1258	765	4275	2438
195	1415	3476	1643	957	639	2243	1678	1603	1182	758	5187	2739	1183	1297	1153	668	2247	1474	2357	2462	655	1067	555	3933	2619	1104	1340	1169	680	2976	6934	5295	2136	2557	4769	6386	3275	1157	3129	1334	922	399	1920	1618	1276	1262	707	4332	2460
196	1427	3469	1791	997	450	2239	1768	1839	1223	794	5141	2745	1197	1214	1282	735	2193	1486	2468	2607	500	1042	558	3963	2544	1079	1230	1105	638	3271	6794	5141	2061	2516	4722	6308	2939	1165	3013	1341	894	422	2291	1474	1235	1340	923	4141	2505
197	1261	3222	1733	943	392	2248	1651	1379	1187	759	4766	2655	1264	1267	1281	639	1957	1432	2237	2609	552	976	731	4008	2651	1381	1312	1083	688	3045	6797	5044	2276	2427	4444	6229	3030	1268	3081	1455	919	419	2298	1449	1291	1310	763	4386	2342
198	1099	3333	1790	858	475	2263	1594	1271	1173	778	4931	2364	1178	1187	1226	741	2061	1514	2412	2645	717	1182	624	4024	2728	1045	1400	1142	713	3175	6351	5152	1730	2659	4776	6134	2884	1171	3072	1404	754	380	2294	1527	1519	1168	744	4178	2534
199	1337	3310	1710	923	508	2187	1578	1384	1205	723	5070	2647	1305	1150	1187	715	2100	1624	2423	2616	678	1101	670	4314	2531	1101	1438	1002	659	2876	6668	4935	1919	2324	4603	6141	2979	1200	3170	1529	913	433	2290	961	1775	1255	830	4149	2534
200	1269	3281	1836	900	399	2343	1672	1358	1285	740	4867	2651	1283	1097	1124	798	2324	1486	2443	2485	851	1031	624	4107	2758	1142	1414	1046	710	3241	6638	5163	2010	2355	4729	5979	2710	1153	3192	1387	718	513	2283	1391	1298	1331	870	4193	2432
201	1271	3300	1815	827	510	2185	1545	1148	1317	848	4833	2601	1269	1259	1166	781	1970	1530	2342	2561	702	1090	628	4114	2462	1109	1356	1023	601	3202	7066	5262	2002	2277	4706	6271	3157	1261	3137	1495	883	402	2228	1386	1341	1245	811	4108	2407
202	1313	3357	2041	822	379	2095	1694	1201	1233	808	5091	2620	1204	1153	1293	757	1979	1530	2343	2405	622	1103	661	3943	2635	1096	1411	929	681	2912	6583	5105	2048	2632	4621	6145	2978	1159	3018	1582	927	500	2251	1446	1533	1299	715	4157	2445
203	1266	3307	2069	919	461	2221	1534	1308	1157	825	4874	2557	1176	1171	1193	691	2060	1371	2332	2643	620	1111	696	3915	2418	1033	1201	951	733	3091	6467	5088	2201	2199	4825	6038	3123	1144	3097	1398	951	361	2158	1445	1320	1308	1012	4367	2482
204	1308	3233	2076	850	528	2256	1639	1923	1272	785	4786	2677	1126	1280	1185	640	2044	1466	2321	2530	626	1101	580	3926	2493	1088	1369	1072	562	3087	6342	5002	2033	2518	4479	6147	2999	1158	2865	1571	941	384	2311	1296	945	1201	936	4241	2418
205	1118	3094	2043	860	476	2076	1543	1236	1164	877	4821	2619	1227	1070	1126	725	2003	1412	1998	2490	597	982	600	4176	2501	1079	1284	1001	741	3124	6584	4975	2051	2232	4413	6006	2596	1168	3042	1453	841	413	2130	1436	979	1211	764	4163	2491
206	1226	3164	1868	787	463	2189	1532	1276	1283	905	4795	2552	1238	1112	1169	679	1974	1589	2092	2615	765	1214	650	3858	2430	1020	1061	1003	678	3029	6566	5155	2083	2468	4555	5722	3176	1200	2807	1425	1012	459	2192	1291	1268	1321	822	4111	2468
207	1306	3049	1793	759	358	2061	1519	1211	1138	675	4807	2490	1109	1312	1068	715	2244	1497	2316	2511	517	1022	764	3806	2478	1013	1288	1082	612	2920	6455	4819	2124	2513	4502	5921	3032	1189	3073	1396	801	481	2226	1326	1184	1263	659	4065	2457
208	1090	3077	1712	828	484	2153	1471	1189	1162	803	4806	2578	1054	1080	1071	680	1836	1267	2181	2318	800	1164	549	3817	2467	1026	1374	959	637	3019	6605	5182	2105	2267	4474	5869	3019	1066	3123	1380	929	336	2222	1388	1445	1248	702	4039	2470
209	1221	3074	1877	757	440	2133	1479	1235	1214	768	4628	2503	1157	1193	1050	671	1897	1489	2270	2415	840	1043	683	3714	2401	1118	1263	998	638	3021	6320	4784	1963	1877	4725	5715	3058	1182	2885	1384	943	412	2251	1315	1275	1248	795	4234	2440
210	1257	3201	1703	840	424	2255	1457	1190	1252	699	4699	2548	1175	1010	1078	644	2017	1537	2279	2329	613	975	632	3680	2492	1005	1291	957	649	3018	6723	4972	1844	2335	4566	5737	3284	1236	2870	1398	952	371	2133	1301	1267	1149	973	3961	2332
211	1211	3011	1778	762	459	2402	1409	1174	1036	736	4582	2501	1078	1167	1116	681	1511	1387	2145	2495	598	959	674	4153	2485	930	1389	1042	645	2860	6257	4814	1761	2281	4419	5403	3056	1353	2718	1318	914	386	2153	1291	1130	1326	942	3735	2394
212	1176	2897	1716	778	492	2022	1472	1185	1131	853	4475	2317	1035	1030	1087	658	2054	1392	2225	2326	873	1083	610	3779	2378	925	1174	921	651	2890	6410	4623	2081	2171	4431	5524	3004	1113	2856	1471	869	498	2110	1165	1371	1078	711	3961	2399
213	1186	3078	1688	732	352	2080	1476	1217	1158	785	4619	2413	981	1055	1108	640	2078	1430	2188	2338	589	1051	536	3716	2254	1002	1304	1002	604	2899	6560	4916	2148	2175	4454	5655	3197	1109	2816	1389	796	458	2170	1296	830	1196	818	3910	2291
214	1244	2916	1656	718	357	2148	1403	1739	1115	723	4504	2406	1050	1001	1044	728	2233	1514	2134	2363	788	1018	633	3718	2286	863	1195	997	658	2920	5918	4718	1973	2090	4160	5592	2899	1262	2777	1392	885	405	2077	1306	1535	1101	617	3761	2340
215	1104	2861	1659	740	512	1990	1415	1240	1108	675	4623	2510	967	1049	915	763	1795	1389	2136	2278	910	1030	681	3561	2447	1128	1279	1054	761	3013	6336	4680	2110	1930	4221	5447	2952	1134	2760	1346	865	308	2096	1136	1396	1057	816	4505	2315
216	1091	2987	1819	726	301	2088	1449	1102	1128	886	4390	2471	907	1109	1124	666	2021	1384	2109	2318	589	1069	656	3775	2315	846	1186	893	674	2593	6250	4811	2112	2396	4411	5476	3033	1318	2711	1327	917	368	1936	1146	1425	1220	628	3872	2203
217	1143	3101	1830	724	400	1901	1252	1605	1156	858	4469	2339	938	1114	1061	756	1695	1354	2008	2437	607	946	678	3851	2452	1067	1254	918	630	3039	6308	4867	2011	1799	4268	5339	3229	1202	2799	1380	612	444	2033	1149	1293	1169	745	3928	2448
218	1200	2834	1771	773	494	2012	1457	1122	987	941	4421	2425	1004	1095	1033	783	1927	1336	1989	2272	650	961	568	3632	2267	868	1134	961	645	2912	6186	4794	2002	2447	4220	5358	2858	1261	2666	1227	607	377	2080	1118	1214	1107	714	3664	2296
219	1165	2873	1781	818	309	2065	1394	1740	1168	745	4331	2322	886	1121	993	695	1732	1322	2032	2382	562	1085	423	3579	2417	835	1279	994	629	2875	6208	4658	1621	2620	4175	5220	2911	1227	2646	1182	833	332	2175	1300	1386	1088	906	4116	2220
220	1075	2803	1681	797	362	2044	1342	1269	1035	747	4275	2345	1001	1121	953	634	1888	1574	2054	2260	652	972	651	3504	2199	923	1230	927	568	3074	6144	4672	1920	2276	4242	5321	3006	1184	2465	1356	595	404	2121	1225	1186	1195	830	3885	2147
221	1034	2742	1693	816	476	1944	1344	1051	1236	1087	4335	2427	890	1028	928	583	1997	1299	2047	2280	815	991	613	3483	2236	943	1260	1037	720	2849	6122	4669	1768	2509	4151	5234	3068	1084	2562	1245	830	298	2076	1199	1544	1127	866	3699	2103
222	1149	2951	1522	673	389	1947	1247	1148	1176	717	4250	2301	890	1062	1078	614	1686	1336	1939	2378	758	987	646	3703	2363	829	1243	844	604	2862	6069	4687	1916	1949	4102	5123	2652	1161	2430	1321	846	283	2017	1204	1166	1140	1011	4071	2160
223	1183	2737	1562	691	287	1991	1340	1322	1025	738	4235	2231	932	1058	943	664	1859	1311	1858	2237	684	1043	534	3554	2202	861	1301	1027	626	2913	6255	4965	1977	2310	4229	5256	2865	1170	2587	1395	702	384	2043	1163	1320	1159	655	4124	2258
224	1050	2650	1649	727	366	2061	1313	1600	1042	861	4260	2249	806	982	1023	706	1896	1367	2226	2371	624	944	492	3672	2415	843	1280	1004	578	2952	5863	4384	2037	2078	3851	5339	3013	1091	2680	1248	838	454	1993	1222	996	1097	879	3490	2140
225	1082	2781	1606	776	433	2095	1200	1177	1068	826	4018	2305	991	1002	951	709	1800	1402	2039	2175	748	894	617	3388	2182	812	1283	973	621	2837	6193	4439	1771	1883	4337	5328	2890	1141	2420	1275	749	286	1956	1186	1208	1138	677	3601	2138
226	1223	2596	1671	668	363	2164	1380	1183	1197	803	4119	2226	896	950	1044	720	1892	1364	2052	2389	666	990	544	3348	2069	882	1045	950	624	2644	6249	4375	2109	2083	3942	5058	2407	1149	2455	1193	706	377	1981	1198	1467	1209	961	3444	2367
227	1075	2656	1638	759	246	1840	1317	1687	1096	806	4133	2343	847	1133	1099	784	1660	1282	1889	2124	649	1055	649	3474	2158	830	1279	882	658	2831	6142	4713	1992	2103	4203	4996	2856	1216	2665	1347	792	469	1861	948	811	1111	889	4122	2233
228	1193	2693	1508	668	305	1972	1192	943	1222	726	4411	2075	811	929	995	797	1707	1319	1942	2085	612	881	499	3296	2164	805	1192	882	686	2755	5725	4490	1900	2374	4145	4638	3103	1026	2547	1322	791	410	1904	1063	1018	1081	841	3980	2104
229	1153	2725	1571	652	258	1856	1262	1004	1023	767	4070	2260	934	980	905	877	1675	1194	1989	2293	548	922	656	3286	2216	846	1128	873	602	2800	5993	4606	1915	2212	3975	5190	2638	1228	2527	1364	718	415	1980	1095	897	1067	661	3927	2062
230	993	2510	1506	782	233	1604	1322	1022	1185	799	3966	2231	695	1031	841	686	1818	1442	2174	2323	645	907	686	3268	2384	744	1397	854	676	2146	5663	4494	2017	2153	3747	4997	2975	1088	2526	1272	690	362	2022	1147	1259	1084	723	4009	2204
231	1139	2436	1550	663	323	1813	1146	1024	986	751	4123	2329	713	947	947	730	1664	1218	1732	2120	827	947	661	3307	2151	784	1260	846	579	2722	5883	4655	1952	2112	4091	4785	3172	1079	2278	1357	680	360	1865	1108	807	1071	789	3846	2050
232	961	2630	1663	582	360	1868	1267	1570	1044	677	4035	2165	820	964	1029	729	1648	1289	2050	2257	643	827	722	3165	2139	671	1041	889	648	2852	5939	4587	1966	2072	3810	4915	3054	1039	2323	1318	696	339	1922	1003	919	968	715	3820	2094
233	998	2348	1440	659	295	1833	1214	1651	994	838	3965	1958	776	1048	943	672	1690	1328	1839	2412	960	899	732	3320	2175	744	1090	944	641	2616	6013	4338	2099	1824	3875	4801	2949	1097	2463	1283	821	418	1979	1075	927	1071	866	3750	2044
234	1056	2494	1628	648	288	1927	1276	1348	1110	758	3979	2182	714	945	893	668	1789	1266	1672	2200	786	1075	552	3215	2151	803	1220	869	761	2785	5868	4403	1934	2085	4057	4977	2967	1143	2244	1065	641	238	1874	1088	977	1089	832	3952	2069
235	1032	2628	1540	657	332	1912	1163	1138	1161	689	4112	2039	804	987	959	742	1627	1313	1835	2082	582	946	613	3329	2097	866	1059	780	578	2963	5681	4429	2014	2106	3837	4903	3116	1125	2392	1279	800	457	1946	1171	817	1202	866	3816	2006
236	1078	2493	1523	660	288	1840	1362	1004	1033	807	3974	2162	755	943	965	651	1621	1317	1615	2108	600	926	736	3356	2066	722	1211	896	653	2741	5829	4333	1566	2602	3794	4969	3040	1088	2364	1275	740	323	1920	1032	813	1042	928	3282	2067
237	1016	2404	1582	716	270	1903	1259	1513	1078	723	3867	2030	704	1038	890	690	1620	1292	2151	2158	533	903	664	3261	2036	744	1068	840	664	2922	5509	4423	1813	2325	4291	4792	3229	1017	2276	1311	603	273	1944	1131	930	1151	611	3702	2000
238	989	2473	1545	611	384	1919	1301	1434	1128	841	4046	2217	781	872	910	697	1611	1218	1920	2084	775	966	674	3161	2070	746	1185	895	682	2805	5732	4501	1964	1911	4046	4699	2873	1007	2368	1240	719	343	2017	1076	796	1027	824	3236	2184
239	1154	2406	1438	734	303	1979	1232	1010	1088	830	3954	2141	739	927	866	827	1531	1187	1758	2085	661	930	698	3368	2222	714	1239	782	617	2563	5565	4429	1927	2381	3790	4759	3240	1097	2303	1302	740	265	1875	1089	966	1051	736	3790	2139
240	1049	2250	1624	663	364	1948	1545	1460	1017	760	3907	2055	725	1024	889	694	1443	1249	1620	2014	801	958	644	3186	2079	640	1097	713	528	2415	5624	4290	2026	2066	3828	4806	2981	913	2263	1235	656	364	2006	1114	1308	1056	705	3768	2012
241	1001	2410	1443	749	301	1835	1146	1542	1147	885	3783	2194	667	900	941	684	1679	1309	1758	2237	671	936	676	3182	1994	796	1090	776	648	2886	5664	4216	1876	2100	3747	4873	2923	991	2267	1175	750	265	1789	1005	1232	1164	925	3722	1958
242	1018	2148	1500	619	190	1635	1278	1003	1094	758	3836	2150	703	971	888	688	1726	1240	1645	2091	689	935	743	3294	2014	773	1045	828	549	2610	5699	4407	2040	2093	3814	4459	3028	970	2244	1202	731	378	1838	1001	1210	1076	885	3429	1853
243	1125	2368	1336	594	313	1937	1206	962	1135	822	3815	2079	795	1029	942	801	1670	1270	1910	2339	704	998	734	3318	2088	661	1136	804	648	2491	5366	4424	1860	2486	3815	4049	2928	991	2166	1178	695	292	1910	1045	898	1147	718	3071	1978
244	952	2466	1399	509	329	1929	1209	1009	1101	768	3847	2150	650	955	864	767	1601	1204	1910	2251	887	922	589	3090	2093	710	951	929	595	2728	5586	4358	2009	1866	3803	4482	3058	1038	2129	1260	741	348	1841	1115	879	1035	779	2987	1987
245	988	2340	1440	667	247	1684	1198	944	1134	832	3753	2047	804	970	849	802	1858	1267	2004	2165	851	905	716	3159	1996	775	1011	842	575	2744	5610	4122	1770	2332	3733	4505	3042	1091	2302	1217	672	232	1975	982	1204	1043	743	3568	1937
246	905	2140	1396	572	228	1886	1202	1517	1179	902	3732	2266	707	868	832	625	1635	1398	1864	2197	722	888	516	3188	2039	745	1055	919	671	2816	5370	4290	1941	2274	3636	4472	3051	945	2101	1077	658	263	1873	994	1360	1081	740	3666	1889
247	874	2156	1365	540	171	1826	1197	1312	1115	821	3697	2073	722	833	807	767	1518	1326	1873	2142	862	916	611	3172	1988	740	1082	811	717	2516	5413	4275	1812	2221	3876	4493	3081	1052	2103	1131	665	243	1882	1011	1159	1027	847	3663	2100
248	940	2289	1297	589	327	1916	1246	1406	976	771	3614	2105	641	969	835	628	1524	1172	1609	2147	770	1049	603	3022	2069	681	1099	807	716	2484	5448	4349	1846	2299	3686	4283	3040	1047	2151	1163	822	339	1929	1026	1240	1065	662	3544	1908
249	979	2083	1470	610	362	1777	1194	1577	1046	722	3589	2097	595	809	772	713	1611	1318	1751	2129	733	952	768	3189	1923	657	1082	900	677	2084	5578	4514	1949	2089	3569	4347	3045	943	2191	1247	652	404	2005	1094	988	1133	803	3534	1999
250	1078	2188	1314	625	268	1830	1204	1533	1034	765	3530	1950	747	828	760	690	1554	1266	1759	1979	817	832	621	3052	1907	693	1266	819	577	2508	5365	4421	1764	2088	3762	4156	3021	1105	2029	1185	685	336	1977	1004	1236	1151	921	3010	1978
251	964	2140	1452	592	294	1921	1166	1005	1045	1038	3550	1888	684	878	888	728	1021	1277	1803	2036	621	1079	694	3129	1942	601	920	789	609	2703	5414	4309	1857	2378	3555	4333	2704	945	2014	1177	647	265	1737	1011	768	1111	742	3643	2052
252	894	2130	1384	609	233	1766	1211	953	1034	783	3623	1784	679	858	853	652	1610	1275	1453	2155	733	865	553	2816	1892	637	1032	789	615	2553	5679	4293	1921	2389	3799	4286	2946	987	2192	1272	690	286	1950	998	1110	1082	789	3371	1911
253	936	2179	1455	637	247	1911	1329	1415	1147	770	3502	1868	650	978	836	651	1582	1238	1852	2095	623	917	668	3111	1835	686	1110	857	666	2559	5398	4258	1972	2261	3645	4212	3297	987	2022	1167	667	243	1837	978	1236	1082	943	3459	1728
254	971	2162	1374	456	333	1719	1268	961	1005	682	3600	1979	703	884	882	712	1805	1123	1947	2020	589	948	617	2869	1901	683	1157	739	608	2642	5503	4147	1852	2102	3924	4499	2950	1020	1959	1134	686	315	1952	1044	870	1124	718	3440	1942
255	948	2100	1455	479	241	1845	1228	934	1111	794	3558	1963	612	811	798	822	1593	1175	1626	1737	785	971	790	3051	2055	733	1226	829	605	2271	5426	4234	2040	2184	3749	4003	2965	909	2085	955	614	301	1775	1102	809	1148	916	2765	1944
256	950	2113	1327	528	207	1733	1196	1024	942	844	3519	1949	638	840	722	737	1454	1257	1713	2148	677	1038	561	2897	1889	571	1060	789	812	2525	5208	4353	1785	1989	3560	4286	2879	897	1929	1114	534	235	1780	988	1168	1029	778	3389	1919
257	939	2124	1420	550	267	1727	1142	1397	947	695	3470	1925	674	893	857	603	1731	1305	1762	2149	626	978	649	3000	1688	570	1236	765	622	2624	5338	4141	1548	2160	3732	4129	3187	912	2039	1215	706	295	1870	1018	1169	1054	807	3418	1825
258	909	2064	1399	576	258	1796	1090	952	1008	830	3539	1948	587	884	708	781	1549	1295	1587	1980	823	903	563	2888	1955	711	984	784	662	2547	5243	4307	1841	2360	3725	4202	3083	994	1834	728	579	312	1740	1003	1187	1153	741	3385	1721
259	847	2279	1365	604	302	1752	1194	1066	1009	875	3558	1886	627	897	928	659	1429	1365	1526	2011	896	976	594	3026	1801	719	989	693	636	2573	5333	4402	1950	2224	3492	4143	2879	973	1902	1135	542	232	1824	1028	1122	1010	819	3322	1730
260	825	2064	1312	571	295	1744	1203	1351	1095	882	3469	1795	596	794	750	634	1460	1076	1470	2054	625	922	603	2766	1919	663	1063	787	473	2534	5201	4514	1758	2291	3772	4046	3022	842	1907	1276	582	264	1762	1008	1336	1055	953	3172	1846
261	1030	1854	1259	513	229	1859	1263	1527	1031	800	3421	1924	517	808	714	765	1733	1150	1702	2143	520	1062	723	2896	1847	628	1262	859	679	2276	5209	4805	2054	2137	3723	4144	2945	789	1867	1144	537	299	1437	1009	1171	1104	770	3345	1693
262	953	2070	1296	521	321	1926	1189	744	986	824	3314	1848	585	855	792	587	1763	1157	1564	1807	585	904	449	2912	1900	609	964	761	638	2481	5309	3996	1749	1900	3691	3891	3051	785	1885	1204	480	204	1693	969	1200	1017	888	3308	1876
263	860	2081	1213	379	241	1660	1203	881	1054	827	3361	1902	470	853	760	594	1208	1223	1845	1814	526	1005	572	2933	1909	600	998	562	695	2459	5275	4521	1846	2023	3818	4034	3198	969	1795	1007	648	300	1671	1085	1238	986	744	3279	1722
264	859	2034	1412	596	197	1777	1237	937	1143	746	3161	1760	666	777	726	695	1447	1195	1728	1959	736	983	658	2882	1814	633	921	659	604	2588	5162	4421	1822	2281	3710	3899	2579	911	1875	1354	511	225	1534	1016	1216	1047	1081	3409	1811
265	899	2006	1460	532	147	1707	1336	840	964	776	3372	1778	508	881	747	648	1605	1246	1624	1957	669	977	618	2947	1915	632	968	703	777	2641	5259	4252	1923	2469	3610	3811	2994	955	1847	1116	663	317	1569	1081	1164	1083	849	3245	1824
266	872	1972	1456	515	223	1468	1144	861	961	682	3428	1691	633	837	765	747	1456	1190	1854	1947	828	780	545	2683	1806	602	930	770	750	2559	4965	4158	1486	2122	3525	3853	3228	907	2029	1107	747	235	1684	1022	1110	934	916	3190	1831
267	892	1933	1252	540	204	1701	1123	1128	1055	803	3269	1943	648	841	667	705	1237	1085	1375	2080	816	880	606	2916	1755	695	1019	750	724	1948	5073	4036	1932	2089	3669	4048	3095	1037	1900	1057	532	176	1783	1047	1265	1071	897	2889	1706
268	886	1947	1454	525	196	1745	1216	1478	948	723	3170	1892	632	835	709	605	1470	1072	1562	1777	600	1002	556	2774	1686	505	830	682	657	2445	5093	4193	1792	2432	3455	3892	3120	947	1723	996	577	330	1649	1047	1359	1054	719	3185	1825
269	729	1959	1425	416	174	1908	981	1417	1114	759	3357	1846	538	791	707	637	1100	1141	1516	1877	814	940	643	2856	1712	575	1072	738	726	2337	4665	4078	2060	2548	3724	4092	2592	832	1831	1116	520	253	1807	971	1220	1072	778	3132	1639
270	991	2039	1412	575	280	1841	1133	1317	887	812	3110	1773	616	810	727	747	1550	1368	1744	1823	863	905	674	2815	1736	625	1025	582	694	2071	4844	4137	1887	2163	3720	3866	3200	865	1907	1067	620	320	1715	905	1170	1011	665	3154	1789
271	866	1926	1281	552	176	1690	1097	809	1022	753	3124	1750	546	867	721	677	1551	1221	1600	1955	575	1002	592	2823	1743	514	949	686	648	2594	5158	3940	1987	2250	3416	4068	2939	937	1801	1153	626	238	1705	1092	1188	1013	699	3015	1528
272	815	1913	1307	599	210	1719	1107	1343	999	770	3165	1622	627	842	858	705	1243	1173	1451	1923	596	866	630	2690	1748	578	929	684	617	2141	4879	4116	1598	2052	3603	3634	2892	1055	1667	1136	555	269	1659	1149	1116	1015	876	3015	1662
273	856	1807	1381	576	226	1775	1060	1406	1019	842	3257	1744	572	744	594	655	1509	1077	1738	1862	624	835	613	2784	1837	511	957	670	744	2216	4966	3967	1835	2027	3720	3720	3073	829	1852	1160	556	243	1693	1010	1171	1108	827	2959	1787
274	841	1989	1303	596	175	1546	1138	1378	1143	901	3094	1890	466	728	715	733	1369	1017	1451	1903	783	896	625	2738	1695	597	993	753	591	2363	4714	3788	2116	1992	3315	3787	2987	824	1797	1160	535	261	1839	1080	1084	1134	749	2918	1783
275	840	1857	1201	518	298	1606	1146	1267	1058	593	2924	1637	604	852	781	581	1403	1168	1658	1869	651	946	663	2981	1654	575	862	651	747	2452	5155	4230	1959	2141	3589	3846	3210	879	1667	1051	657	282	1681	863	933	1101	574	3045	1686
276	850	1931	1293	486	254	1514	1087	792	1085	684	3108	1630	605	791	638	639	1542	1082	1645	1836	698	877	643	2804	1758	503	895	644	624	2158	4839	4053	1918	2013	3454	3560	3229	919	1789	1043	645	268	1772	929	1131	1019	703	2873	1613
277	917	1866	1274	595	220	1690	1025	852	1064	845	2979	1733	491	812	663	693	1267	1153	1522	2087	611	988	552	2619	1650	458	1022	763	673	2417	4655	3859	1866	2227	3503	3684	2709	824	1792	1197	585	165	1753	1048	1120	1032	735	3033	1896
278	935	1930	1245	471	239	1751	1169	1379	1028	787	3082	1634	527	749	624	695	1290	1120	1654	1724	643	912	675	2894	1674	650	1001	647	657	2477	5004	4214	1915	2226	3289	3418	2986	923	1818	1058	530	243	1623	848	1219	906	894	3028	1607
279	879	1862	1382	442	152	1627	1116	1051	944	821	2877	1636	615	744	780	639	1264	1057	1620	1612	792	1033	557	2785	1590	479	1010	700	614	2347	4955	3854	1815	2298	3462	3768	2854	874	1749	1089	617	172	1641	1073	1029	940	851	2906	1674
280	771	1820	1375	471	189	1601	1154	1368	937	703	2981	1750	510	730	692	751	1442	1013	1623	1814	636	902	647	2809	1876	589	1029	638	615	2320	4703	4039	1752	2018	3423	3503	2945	830	1705	1212	462	241	1564	1026	1056	1001	995	2816	1862
281	751	1730	1390	485	255	1748	1132	808	938	930	2938	1786	450	893	785	808	1302	1224	1444	2088	609	859	549	2721	1619	524	950	724	740	1997	4833	3723	1871	2029	3522	3281	3029	898	1799	1060	568	75	1772	1054	799	950	768	3051	1744
282	962	1821	1276	521	207	1694	1244	1310	958	733	2925	1677	502	737	662	660	1115	1093	1554	1682	596	977	679	2665	1700	534	966	712	561	2535	4777	3948	1901	1927	3588	3551	3031	949	1693	1068	405	208	1761	1036	1121	1095	1001	2809	1660
283	662	1939	1346	472	199	1744	1121	787	1030	724	3016	1589	555	810	731	597	941	1083	1426	1831	808	916	645	2557	1636	483	941	753	819	2270	4769	3903	1884	2390	3235	3500	3102	778	1722	1204	506	278	1668	1050	1085	927	666	2794	1637
284	833	1660	1231	459	183	1829	1166	981	1145	683	2952	1609	500	860	630	807	1278	951	1737	1897	550	998	653	2684	1620	576	878	630	762	1975	4856	4001	1903	2324	3824	3621	3217	778	1630	1040	448	202	1701	832	1086	958	679	2718	1453
285	755	1769	1294	500	244	1387	1148	1427	1067	838	3016	1588	573	815	666	720	1152	1025	1451	1898	760	949	603	2695	1677	557	978	602	484	2029	4961	3640	1654	2070	3588	3592	2941	839	1650	1080	592	253	1733	1059	1196	950	826	2882	1634
286	790	1879	1229	447	208	1748	1036	835	978	734	2766	1724	474	864	588	745	1196	988	1658	1866	630	811	696	2474	1618	583	1005	669	686	2068	4835	3676	1726	2143	3363	3594	2923	888	1581	1003	562	239	1707	962	1163	1064	847	2885	1653
287	777	1761	1294	478	147	1711	1096	767	957	727	2804	1484	537	815	677	646	1181	1016	1598	1744	746	897	774	2635	1608	586	863	741	616	2139	4650	4045	1838	2135	3624	3427	2802	906	1541	1142	549	177	1687	991	1061	1090	809	2652	1584
288	800	1805	1266	478	70	1728	1113	944	917	731	2834	1632	560	861	679	662	1235	1036	1408	1917	572	1006	773	2552	1596	467	978	574	652	2401	4532	3921	1883	2238	3662	3475	2696	798	1742	1006	500	343	1566	1009	1081	928	730	2795	1537
289	858	1794	1260	469	158	1576	996	794	1045	770	2812	1593	488	713	653	684	1196	876	1349	1848	671	916	634	2661	1426	507	901	666	611	2167	4753	3812	1878	2389	3481	3414	2656	837	1585	1190	544	264	1750	929	1102	1069	775	2885	1582
290	750	1897	1176	432	262	1515	1005	1072	1100	862	2831	1519	558	733	750	635	1396	1133	1357	1950	656	731	717	2732	1510	470	987	583	565	2374	4791	3998	1695	2255	3430	3613	2702	727	1722	1146	584	212	1681	894	1203	1112	888	2782	1520
291	794	1706	1250	535	256	1614	1032	1395	1006	808	2898	1583	446	831	637	675	1407	1100	1432	1916	704	903	542	2360	1565	538	915	619	581	2513	4654	3970	1799	2131	3500	3390	2687	961	1472	1071	470	248	1575	898	1108	1032	735	2624	1584
292	794	1651	1190	477	184	1617	1073	1346	1070	907	2546	1690	424	745	821	664	1290	1027	1408	1916	706	1011	740	2554	1619	507	1106	788	609	2307	4703	3607	1947	2397	3386	3432	3333	874	1587	1049	572	220	1663	1083	1081	977	742	2813	1485
293	788	1708	1286	431	159	1615	1119	1293	1002	779	2684	1629	518	812	714	656	1149	1115	1431	1820	791	918	607	2443	1591	506	963	656	597	2337	4742	3733	1678	2147	3443	3448	3040	743	1573	973	448	233	1682	1030	1161	917	896	2644	1604
294	828	1518	1259	386	239	1534	1130	1278	932	734	2775	1499	488	798	696	675	1361	1076	1303	1872	715	975	762	2582	1589	404	1003	606	553	2229	4461	3775	1884	2020	3600	3428	2674	864	1662	1046	430	211	1532	950	1138	1009	759	2649	1565
295	748	1601	1154	300	216	1614	1083	893	974	665	2672	1507	431	810	726	768	1389	1056	1425	1920	515	945	832	2502	1539	480	959	679	688	1997	4821	3651	1750	2195	3387	3071	3100	768	1539	1066	582	280	1613	941	1273	1040	688	2664	1566
296	760	1692	1305	313	146	1582	1057	828	1082	876	2715	1533	473	822	674	735	851	1046	1444	1851	628	980	668	2483	1554	558	721	658	653	2146	4570	3912	1951	2209	3516	3269	2722	741	1467	994	484	208	1565	1027	966	929	905	2744	1524
297	837	1752	1144	469	207	1578	973	1235	1014	758	2627	1723	601	773	671	760	1269	991	1417	1903	623	881	568	2629	1647	453	1018	604	684	2101	4443	3774	1752	2545	2998	3387	2572	818	1508	1039	468	313	1271	880	1015	1058	730	2758	1461
298	824	1578	1226	501	240	1468	1053	1068	1074	734	2721	1585	429	704	574	665	1509	1185	1559	1976	737	847	643	2538	1525	489	805	569	597	2437	4762	3896	1738	2035	3376	3703	2703	737	1594	1057	484	117	1598	944	778	1110	723	2622	1471
299	875	1617	1227	363	215	1581	986	1362	872	787	2583	1693	513	765	504	743	1383	1034	1380	1775	695	935	621	2527	1496	516	902	621	577	2294	4588	3574	1979	2068	3396	3311	2854	885	1614	1153	544	213	1605	896	1124	881	899	2730	1452
300	672	1666	1171	475	132	1684	956	1323	1033	820	2661	1446	546	691	503	684	1109	991	1365	1709	953	981	488	2662	1549	562	1055	642	607	2454	4363	3903	1718	2396	3472	3293	2705	813	1674	1095	487	165	1599	807	1074	916	755	2728	1509
301	854	1633	1205	455	224	1367	1090	1367	975	806	2542	1514	463	772	629	646	1036	1023	1513	1747	855	927	608	2298	1442	488	849	643	676	2178	4434	3943	1851	2345	3578	3146	3092	818	1557	1152	465	256	1595	1009	1126	1036	808	2686	1420
[truncated: 61 more columns]
