# Supplementary material for: Reliability of an interneuron response depends on an integrated sensory state
Source: eLife. 2019 Nov 13;8:e50566. doi: 10.7554/eLife.50566 (PMC6894930; doi:10.7554/eLife.50566)
Supplement: Figure 4—source data 1. [file elife-50566-fig4-data1.xlsx]

## Sheet: GlutKO
Figures 4CtoG, 4S-1A, 4S-1B, 4S-2N, 4S-2O
AIA::GCaMP5A F(A.U.)
Stimulus:	AWA::Chrimson
Genotype:	WT
N:	1	2	3	4	5	6	7	8	9	10	11	12	13	14	15	16	17	18	19	20	21	22	23	24	25	26	27	28	29	30	31	32	33	34	35	36	37	38	39	40	41	42	43	44	45	46	47	48	49
Frame (Pulse at 100)
1	274	404	79	237	200	65	232	478	289	289	410	487	310	143	373	524	260	188	181	-9	561	505	505	599	397	316	335	412	299	384	220	118	527	363	322	295	303	164	219	210	140	531	279	308	273	187	233	138	95
2	358	402	107	250	154	196	319	495	309	239	411	456	322	160	372	501	222	207	237	132	478	413	489	608	349	335	427	384	359	360	330	99	485	337	340	310	301	174	218	180	254	354	245	331	303	255	231	206	223
3	267	266	173	344	198	216	379	447	232	349	438	440	368	186	349	460	216	179	175	258	608	404	467	387	217	411	483	372	215	369	271	127	511	411	331	252	345	210	271	76	202	506	367	161	303	267	261	128	52
4	214	384	183	245	167	345	337	295	269	322	301	431	330	160	411	489	96	278	151	141	624	429	475	548	250	338	296	361	290	328	189	192	438	339	281	336	281	178	217	221	237	437	342	382	296	226	257	227	116
5	383	332	103	203	79	200	278	515	258	248	495	450	351	119	324	529	187	291	230	107	657	637	457	540	275	249	165	500	275	247	224	162	365	443	340	276	329	168	169	240	208	405	298	276	275	82	284	157	148
6	336	382	148	388	293	199	367	476	279	332	329	351	312	111	277	461	186	212	301	218	643	473	497	574	258	237	308	332	373	445	205	98	519	397	220	310	430	163	205	97	220	423	323	301	275	140	339	176	181
7	199	432	196	162	253	211	333	485	235	306	334	371	322	242	345	463	291	257	212	122	747	371	393	501	295	337	293	416	236	369	279	103	471	464	328	234	376	293	173	204	246	428	232	398	319	143	217	155	70
8	351	353	90	381	230	298	264	462	257	280	386	357	290	99	318	372	137	154	308	152	649	441	439	676	404	461	350	339	372	267	251	180	374	396	371	273	402	205	321	217	215	456	362	278	171	123	305	289	162
9	176	368	181	202	371	254	165	465	294	236	321	313	338	245	399	439	240	231	157	232	561	506	364	490	335	361	185	449	331	321	295	220	498	444	284	226	395	204	210	142	248	503	340	416	236	162	309	231	94
10	345	279	139	315	194	162	297	467	213	228	379	394	275	160	302	413	205	213	193	227	582	421	326	457	331	303	502	334	216	364	162	102	491	342	269	276	265	185	193	215	220	345	295	309	237	226	381	171	225
11	306	320	168	406	247	195	344	526	290	405	392	480	291	79	326	479	127	182	263	174	571	576	449	507	223	215	225	395	244	247	279	198	416	368	308	309	362	213	177	173	273	276	256	239	206	169	378	94	167
12	359	360	149	293	309	150	414	457	305	250	330	355	298	125	398	400	285	167	267	182	600	335	418	573	245	438	333	474	383	332	281	112	376	300	295	355	341	196	229	146	274	496	260	338	199	189	300	143	200
13	352	434	163	282	291	127	312	394	332	318	378	336	373	257	424	471	227	105	162	218	454	514	408	499	339	357	379	466	266	396	339	188	598	472	287	274	360	134	251	189	271	447	298	290	263	134	190	140	191
14	254	378	151	426	209	140	287	520	228	335	386	383	274	154	337	518	264	336	251	62	508	353	356	456	382	523	550	531	277	387	298	192	412	471	286	251	329	314	267	177	235	373	321	357	217	221	344	244	168
15	307	358	226	336	244	311	235	440	292	359	435	281	365	181	344	456	247	260	198	165	520	409	551	490	246	405	493	490	238	415	273	261	580	394	350	354	451	213	263	188	256	433	340	262	253	155	274	319	128
16	318	434	172	304	300	143	321	460	284	292	378	433	410	167	348	401	200	163	216	135	522	448	409	396	208	469	351	362	238	324	189	96	359	367	252	301	392	213	287	139	163	467	246	314	196	98	347	216	61
17	222	336	226	345	395	160	348	426	243	394	306	373	348	134	355	385	166	145	321	297	612	398	436	493	246	386	504	572	269	222	293	170	466	344	328	301	503	258	282	182	198	339	321	408	258	179	187	219	145
18	200	433	207	250	280	172	318	467	241	330	439	393	356	244	340	393	193	223	250	215	512	501	399	436	247	388	464	342	314	335	196	138	387	390	242	247	367	283	287	223	223	542	314	343	207	150	348	285	225
19	240	339	177	270	173	138	309	570	377	364	393	317	302	290	379	428	274	156	204	168	581	352	392	313	153	528	643	312	251	318	283	143	432	458	325	252	312	263	195	107	278	395	349	217	248	198	291	154	182
20	380	430	150	288	237	189	315	465	230	284	423	387	329	115	428	445	218	252	168	200	560	541	329	490	265	383	338	386	281	304	258	176	566	477	246	292	302	263	215	265	221	350	277	333	219	153	251	169	100
21	302	294	97	393	282	196	283	405	288	247	456	322	363	260	447	455	249	222	287	124	579	467	451	394	257	291	482	339	266	406	313	192	526	429	251	286	367	165	352	193	225	351	353	407	282	146	330	99	139
22	255	386	57	205	158	114	295	427	257	304	310	411	394	188	370	305	164	219	202	198	567	317	346	455	186	568	412	391	290	317	243	115	562	564	363	347	341	269	165	267	158	305	279	315	154	150	84	209	87
23	299	311	193	152	167	302	323	492	251	248	377	371	455	167	471	327	230	270	136	239	545	555	416	387	247	388	419	447	301	368	256	131	380	516	277	371	224	244	171	130	189	408	296	260	261	155	230	201	161
24	184	366	201	175	291	257	305	410	323	345	253	409	379	100	434	312	190	245	154	228	498	447	373	561	179	310	305	530	245	385	385	155	418	436	502	273	349	255	205	206	225	511	194	218	299	163	301	230	82
25	443	290	212	304	275	212	346	373	181	383	327	404	415	95	488	478	218	180	238	197	536	509	435	431	286	287	522	496	215	419	214	124	510	450	258	340	386	220	218	146	237	551	338	447	226	174	166	77	208
26	407	328	304	290	212	208	329	378	227	296	353	306	320	208	448	410	235	292	209	72	451	412	457	399	261	423	537	394	264	232	282	130	505	436	393	336	355	249	237	139	204	424	291	272	188	272	314	58	184
27	377	355	317	221	334	345	307	384	226	283	437	286	376	212	327	501	200	248	153	189	587	478	468	536	159	375	582	370	275	360	271	163	414	464	326	258	461	212	156	181	255	380	226	354	233	153	334	162	130
28	261	272	203	309	282	137	333	527	309	320	346	271	313	192	530	375	260	226	228	140	588	469	474	372	291	248	438	591	311	371	257	213	488	472	312	315	333	170	301	102	293	348	333	217	281	171	363	225	75
29	328	404	292	339	174	177	380	562	179	363	395	340	324	146	334	518	163	185	241	216	530	475	539	555	125	317	381	527	232	391	216	226	484	507	218	184	331	320	185	183	242	430	309	271	252	111	259	210	46
30	203	282	297	224	191	161	235	469	317	364	359	333	334	107	345	430	183	212	289	203	546	459	492	484	138	203	460	384	227	387	335	147	391	342	280	320	394	245	193	196	306	398	311	267	226	109	363	224	187
31	256	409	408	236	227	195	363	420	141	319	406	488	340	185	465	615	260	240	217	209	529	617	605	468	147	150	444	482	276	365	273	183	555	307	210	291	452	131	294	107	154	379	362	240	260	62	254	211	122
32	304	389	264	290	268	190	290	555	338	315	342	410	375	190	425	781	162	181	271	170	662	543	670	442	224	270	356	460	256	302	239	186	493	433	309	257	357	297	209	212	239	413	333	262	272	166	375	244	198
33	313	377	188	328	357	287	397	321	239	291	411	411	321	222	445	752	128	205	141	240	585	472	836	430	107	524	468	449	191	351	315	148	487	404	214	271	407	147	189	195	206	382	319	385	151	189	273	93	138
34	322	361	174	348	209	221	295	452	275	283	407	498	398	98	393	684	228	276	232	248	437	408	848	453	178	406	427	401	275	328	333	210	570	413	355	273	389	168	249	226	312	349	184	242	300	161	186	210	180
35	247	376	264	413	301	276	410	457	392	322	421	420	352	200	344	781	189	182	170	207	589	636	790	319	154	309	528	396	240	362	185	271	395	416	252	183	404	147	192	140	167	372	227	297	274	252	312	285	82
36	437	301	407	403	277	234	238	404	261	262	316	241	318	107	392	836	203	193	231	201	506	470	971	425	326	409	444	305	209	325	293	162	425	347	484	294	311	244	190	182	254	387	213	376	280	142	330	249	208
37	328	360	198	303	113	235	328	497	269	295	363	286	419	193	428	743	245	220	203	162	594	466	846	476	124	242	412	333	258	324	322	160	446	347	294	307	389	234	230	211	360	444	291	316	284	136	289	176	226
38	254	302	197	254	182	313	295	405	277	335	275	449	441	190	348	708	133	174	246	163	630	515	877	423	215	357	508	426	243	258	275	164	522	401	225	304	475	226	236	141	278	364	233	247	239	151	362	109	102
39	334	359	174	383	208	199	281	478	312	395	456	445	275	188	394	803	202	188	209	229	504	463	709	466	196	325	457	383	311	346	278	160	504	364	277	219	342	253	188	155	276	329	286	339	271	109	332	186	109
40	304	309	318	241	274	170	319	435	250	338	380	439	455	125	376	671	99	229	170	278	674	549	761	343	191	477	498	396	255	385	288	165	480	330	318	263	435	261	132	187	133	382	194	290	254	135	351	232	108
41	307	426	280	238	346	287	279	444	286	259	464	430	349	194	375	778	152	166	301	258	677	544	749	466	131	350	489	413	145	290	195	176	410	336	338	322	342	183	202	163	168	480	251	265	281	132	293	262	131
42	307	358	283	362	317	157	247	385	282	273	345	393	277	93	426	654	270	211	259	148	551	458	545	544	190	447	485	382	351	460	301	167	424	291	287	286	346	195	208	167	334	367	265	382	322	171	331	223	101
43	432	313	306	373	268	253	277	482	365	301	364	334	354	244	290	695	186	149	172	202	599	392	620	568	218	219	418	488	235	294	278	156	343	354	255	187	453	232	271	170	297	428	183	312	265	213	292	241	116
44	292	483	302	361	276	195	328	408	323	297	373	323	382	190	340	677	147	155	226	132	519	391	670	453	30	478	363	392	159	382	262	259	541	299	294	341	413	270	227	185	299	358	268	288	301	168	317	125	220
45	308	396	194	313	355	151	338	507	280	324	398	460	352	258	347	670	166	138	165	229	635	504	578	513	106	256	419	454	217	407	208	238	431	264	304	371	397	223	202	92	235	382	225	346	259	244	301	199	204
46	235	421	222	275	105	233	361	453	315	354	451	306	347	122	378	565	157	121	310	220	656	451	562	498	122	379	614	302	169	302	351	136	510	287	369	202	370	218	217	52	218	453	166	381	218	185	298	192	135
47	196	385	220	228	323	167	413	452	238	311	407	463	378	162	396	571	166	144	180	182	555	452	533	458	187	392	394	386	295	399	229	127	410	250	324	307	358	219	212	119	114	462	262	260	207	185	324	142	43
48	350	372	300	230	264	319	273	510	277	400	388	387	417	244	354	664	235	253	217	143	628	463	531	520	171	334	399	473	299	363	184	141	391	274	320	258	387	219	189	148	208	337	247	192	268	207	324	214	122
49	304	407	331	299	337	238	264	413	209	256	413	474	322	242	336	568	247	194	321	196	508	496	532	444	241	321	528	464	234	289	347	137	426	285	252	267	352	218	220	162	307	324	322	285	271	141	394	253	84
50	364	523	226	226	393	196	233	437	292	373	331	374	276	94	381	520	236	225	321	147	433	470	481	466	138	391	505	360	382	339	196	113	527	195	399	252	341	203	220	161	188	345	189	309	294	146	337	160	205
51	249	435	201	251	211	287	283	411	235	283	317	375	335	113	256	563	235	192	261	197	507	456	533	507	176	396	553	378	239	371	265	181	423	341	237	358	373	294	284	228	306	414	200	297	218	212	254	314	147
52	295	293	341	420	303	166	329	441	167	394	469	304	405	258	354	582	189	227	236	266	654	413	533	577	275	428	444	349	265	245	287	172	390	202	316	253	400	241	205	158	345	320	333	256	266	168	349	236	175
53	272	380	215	251	236	256	276	461	256	273	390	416	315	235	336	375	189	194	329	156	530	551	486	329	201	370	517	348	146	337	218	235	459	275	368	324	423	208	243	109	168	303	174	273	174	140	288	244	185
54	353	397	266	221	377	167	276	471	296	302	422	391	330	126	379	634	198	190	296	156	679	512	434	563	346	376	566	434	211	325	211	173	556	200	350	326	366	233	324	123	273	400	353	294	233	142	309	178	92
55	270	304	300	324	226	254	268	433	222	360	281	302	373	195	250	610	231	185	280	131	662	363	544	572	194	352	566	461	355	369	168	97	488	234	373	277	352	250	250	120	186	341	235	227	177	210	268	139	203
56	377	352	199	289	185	200	339	477	202	332	502	504	266	182	378	553	245	287	343	217	581	490	522	507	204	322	439	382	272	391	272	157	397	279	326	435	366	191	253	218	359	307	242	289	192	120	354	174	239
57	224	300	263	278	291	186	375	399	213	153	386	297	306	77	334	435	254	112	203	247	547	459	362	562	112	284	397	440	326	389	294	94	505	305	357	359	327	164	239	144	270	539	159	322	208	286	373	185	206
58	273	449	211	372	239	196	448	429	331	342	414	433	278	227	344	558	220	100	280	180	504	525	379	634	326	418	556	342	309	345	214	204	477	288	326	269	309	221	327	231	352	470	216	351	212	98	340	249	130
59	303	506	201	433	276	176	356	527	296	300	371	376	401	161	354	497	281	265	321	216	564	453	573	443	270	360	488	387	421	491	348	205	457	231	260	314	428	145	284	164	269	411	213	379	277	134	208	244	118
60	259	441	248	308	336	139	263	512	202	383	348	383	324	171	347	487	156	121	305	199	524	455	588	591	407	562	474	423	272	397	253	172	454	355	366	219	397	135	243	206	230	423	171	291	300	147	334	154	153
61	297	395	275	303	196	168	316	469	246	348	390	409	340	145	294	534	194	346	434	196	516	458	387	588	285	405	446	420	249	336	330	173	435	288	294	193	361	208	269	187	290	469	200	201	213	178	308	246	237
62	347	428	133	257	219	165	287	504	227	405	385	353	337	137	233	504	266	344	382	200	629	460	437	526	318	404	574	424	343	307	216	138	445	284	260	344	392	229	304	140	230	401	217	376	317	122	379	176	238
63	371	290	245	348	101	167	384	468	313	358	422	336	402	312	376	518	331	276	432	241	524	437	452	450	297	416	483	301	222	343	253	73	513	247	314	341	344	191	245	280	271	402	296	327	304	135	338	160	204
64	289	360	277	294	343	253	198	444	300	266	384	480	318	176	318	462	223	288	437	205	537	468	471	415	410	430	501	481	199	351	316	58	446	237	326	258	290	247	221	142	221	398	269	322	259	188	455	213	159
65	284	402	192	320	259	146	241	571	216	327	413	342	480	182	189	508	233	325	434	125	557	530	386	478	199	288	503	424	264	300	173	173	478	261	285	288	375	223	233	142	287	337	249	356	217	269	330	146	135
66	222	309	282	197	264	229	332	438	175	249	491	387	371	156	325	447	189	367	462	221	568	505	425	527	270	359	447	341	305	424	253	142	413	178	291	395	337	198	139	239	287	299	199	227	181	203	293	207	130
67	281	386	254	367	287	238	332	418	246	262	463	355	384	120	286	490	197	352	470	163	543	416	431	521	234	543	445	319	267	399	330	140	491	220	457	269	304	181	231	93	258	410	256	347	265	132	325	72	164
68	271	348	300	228	286	326	263	474	298	238	284	367	383	184	240	455	211	383	396	233	624	467	429	649	381	441	435	373	256	330	290	174	486	142	324	190	464	208	276	205	179	398	173	259	250	148	307	246	99
69	186	354	223	394	296	151	299	403	249	306	447	311	379	163	337	456	250	361	524	214	519	408	410	582	309	313	331	405	281	411	186	180	448	290	307	299	358	252	244	177	250	420	266	295	289	222	325	249	58
70	308	336	230	323	279	156	373	444	307	227	320	337	470	174	272	398	162	412	262	221	432	475	462	495	150	404	426	308	369	448	320	102	630	386	306	237	372	260	318	187	236	383	256	288	330	117	352	207	149
71	292	477	238	378	222	152	310	436	289	358	364	440	350	160	290	448	233	443	432	277	510	528	419	469	270	357	365	326	270	288	218	228	454	242	275	358	391	199	268	179	253	472	169	379	270	182	225	160	125
72	300	393	217	254	183	214	398	403	295	341	450	450	343	145	317	500	158	383	445	84	604	603	487	546	189	407	473	338	250	301	255	96	537	221	254	223	440	213	196	153	254	449	303	512	197	270	312	177	126
73	326	368	248	299	242	214	286	429	280	439	343	482	315	146	305	391	211	375	491	162	583	485	424	533	265	428	406	450	277	278	213	131	391	365	306	273	345	211	358	267	279	412	247	264	245	144	351	340	42
74	260	315	137	320	344	207	214	421	256	284	357	530	372	215	330	450	214	395	444	181	622	500	314	480	149	401	450	359	226	321	272	169	519	243	335	253	335	253	343	127	210	394	220	376	198	190	361	205	99
75	225	395	287	240	321	229	246	384	289	304	312	525	318	224	307	422	128	423	511	159	567	451	423	375	111	393	590	338	282	458	224	136	487	152	346	248	285	249	298	236	243	405	242	369	133	170	341	196	229
76	278	399	282	349	371	266	291	416	352	314	315	376	317	142	311	487	267	334	407	177	646	379	503	606	130	272	459	480	290	182	185	191	479	213	349	278	379	306	283	215	307	394	258	390	111	171	287	264	66
77	270	315	204	292	279	334	334	513	306	248	454	523	364	158	423	491	208	314	460	103	612	560	416	591	194	280	463	266	298	321	188	108	327	218	316	273	303	123	291	125	276	439	254	308	251	218	351	241	86
78	334	330	248	479	262	121	222	476	287	297	372	474	397	150	483	529	249	256	469	189	559	463	448	496	250	216	344	337	180	495	247	153	522	285	341	306	415	237	209	214	313	405	280	300	365	239	244	174	239
79	234	385	272	216	175	201	315	457	280	248	434	320	316	86	274	483	144	300	394	155	541	443	387	514	159	195	401	358	335	398	243	121	539	427	328	212	343	182	327	74	200	427	179	293	279	239	329	222	140
80	254	379	188	346	169	363	360	457	287	350	329	439	415	131	333	473	196	315	410	102	434	362	325	504	107	262	518	410	183	316	227	153	465	255	339	267	497	208	270	164	202	316	272	274	222	205	266	104	160
81	275	421	272	433	192	140	339	474	293	360	315	414	314	253	377	451	225	281	472	180	487	442	429	613	224	228	462	399	171	377	290	163	429	235	357	292	387	187	332	236	351	512	244	334	279	130	282	201	158
82	238	374	277	309	121	166	354	413	305	325	384	428	508	222	338	417	200	298	488	77	476	426	511	505	250	319	607	449	297	313	175	228	391	228	400	340	307	195	225	185	145	415	277	265	265	136	364	170	45
83	411	445	209	287	273	202	272	431	283	398	422	339	370	153	376	477	233	335	462	99	598	463	308	550	19	346	605	495	357	362	294	66	494	267	327	263	269	172	166	138	183	392	267	289	379	242	358	192	82
84	330	396	242	369	192	175	362	439	214	410	310	447	305	288	271	463	242	309	455	227	543	467	337	463	217	261	547	396	218	307	306	135	459	293	243	305	256	176	239	209	222	401	105	314	192	178	339	179	163
85	277	311	282	294	286	228	310	448	329	301	405	440	305	268	276	538	102	361	597	213	553	503	452	499	239	240	555	389	222	361	280	71	574	220	298	281	350	170	209	178	205	405	258	371	229	155	392	65	86
86	324	383	290	309	179	223	318	425	231	334	409	343	330	180	357	533	291	247	406	217	477	531	440	595	145	287	427	300	333	375	236	211	517	318	303	349	349	255	230	113	240	401	292	286	294	224	297	318	150
87	286	490	323	328	278	255	409	451	243	478	278	347	378	187	370	519	134	319	389	216	496	426	429	458	131	219	386	350	283	354	189	200	543	263	264	281	363	240	187	191	226	335	235	216	247	303	259	126	148
88	304	291	150	340	264	126	314	509	284	308	330	361	385	137	304	415	183	204	458	93	488	558	396	483	159	406	521	348	245	386	262	151	496	223	267	300	396	195	180	296	291	323	200	296	258	193	358	0	116
89	170	333	171	292	319	258	363	479	298	355	401	447	311	160	312	461	230	176	383	162	541	521	412	565	207	437	473	504	271	313	311	121	479	237	288	281	339	309	277	119	223	508	251	268	303	275	235	314	141
90	338	370	172	317	201	170	212	384	285	307	474	352	245	147	375	409	249	184	441	195	459	484	284	537	108	388	533	449	242	317	255	241	505	261	313	155	322	204	183	110	290	295	360	418	236	190	410	191	116
91	288	339	231	285	198	291	258	487	242	359	313	473	386	266	313	469	135	256	328	213	491	415	504	608	162	401	457	423	279	430	177	154	430	309	226	294	417	218	240	224	256	293	231	367	198	175	274	273	119
92	313	440	197	309	315	149	369	462	245	398	315	382	492	189	298	408	162	233	305	198	465	576	445	432	237	423	543	305	374	296	201	190	437	274	383	361	370	249	241	227	246	385	263	252	192	230	248	258	110
93	221	375	255	385	143	306	358	424	215	377	296	465	372	206	313	383	216	275	416	187	597	382	416	494	81	354	399	426	225	343	273	115	546	253	276	231	322	259	216	87	247	321	288	257	150	156	469	196	284
94	363	365	337	360	303	255	427	438	247	319	257	330	353	214	279	460	144	245	332	180	562	490	417	421	139	315	524	557	209	367	241	157	553	236	251	294	415	178	226	153	284	427	307	218	207	71	350	234	194
95	215	398	212	152	242	66	283	472	312	373	404	465	381	201	278	415	234	200	395	163	552	535	479	614	146	449	613	481	233	382	230	94	539	400	363	318	317	181	190	160	198	434	198	325	150	158	166	185	136
96	355	313	132	254	201	231	325	511	221	359	434	455	375	196	316	454	174	186	385	184	400	366	400	499	212	531	512	594	253	307	339	224	488	396	373	264	416	211	221	152	363	407	230	253	266	180	353	212	86
97	332	313	169	353	354	255	315	410	285	306	418	397	331	252	283	526	171	292	375	152	561	422	335	553	74	398	412	670	237	346	350	197	506	603	239	315	338	270	226	276	239	313	270	302	213	179	300	309	49
98	307	387	221	226	228	237	371	447	246	292	423	457	288	207	385	453	226	222	340	191	566	506	394	443	37	538	569	497	240	330	245	260	431	445	437	280	430	251	221	163	304	502	252	352	234	203	371	251	62
99	474	407	295	361	264	185	253	464	204	303	274	344	420	112	378	444	217	171	373	66	503	453	383	674	137	448	445	783	349	376	218	147	522	400	214	234	444	253	215	153	323	378	331	270	273	248	306	177	133
100	421	302	292	435	285	274	329	427	354	229	335	375	315	188	272	446	200	218	471	148	493	495	333	530	252	404	488	437	281	256	241	183	437	412	400	349	447	180	201	177	124	388	230	272	207	299	415	173	97
101	328	354	251	354	276	238	418	505	344	340	354	495	383	139	362	459	153	195	436	150	488	392	323	559	153	404	380	611	232	414	182	169	520	522	384	361	373	216	258	215	174	333	244	376	240	135	421	247	126
102	322	294	179	286	277	211	321	513	197	354	239	371	326	226	296	443	190	230	465	142	536	469	353	650	99	533	534	732	273	419	253	156	439	500	375	360	332	305	339	80	259	415	256	262	293	221	374	185	186
103	226	277	198	320	268	290	359	409	266	266	297	353	378	210	307	349	222	304	417	206	506	443	437	498	166	367	439	533	259	440	251	79	376	554	355	284	363	292	255	194	235	326	208	346	281	207	257	238	147
104	157	353	127	303	210	245	280	480	240	288	354	482	222	151	344	409	275	285	524	151	357	495	379	630	225	488	547	568	367	483	198	128	432	593	181	239	354	188	168	97	292	376	251	336	216	196	401	212	158
105	304	356	276	273	211	175	343	556	302	362	364	358	364	118	382	459	193	334	452	222	569	466	279	520	142	574	565	572	293	513	253	215	397	504	355	277	335	251	274	153	296	400	242	243	161	178	383	153	128
106	322	393	275	310	245	336	254	505	228	398	344	343	254	224	360	452	143	272	579	162	493	515	328	667	144	355	526	663	289	490	287	199	404	635	349	298	316	222	225	100	188	348	174	300	226	195	378	239	192
107	268	314	85	251	202	114	400	447	296	332	473	463	390	82	322	417	204	240	582	86	464	379	416	610	225	467	548	550	212	373	255	114	499	550	267	312	366	243	277	201	182	392	345	286	305	232	342	244	92
108	326	378	245	318	212	201	238	370	293	462	357	389	265	267	273	332	259	185	579	160	478	539	485	739	125	383	585	618	329	409	278	108	566	535	211	362	351	135	149	216	196	356	300	265	354	195	382	229	84
109	406	368	186	297	295	104	321	528	386	356	382	398	371	210	314	447	172	306	603	168	545	525	408	648	138	389	392	642	216	328	381	219	379	575	395	356	397	223	290	87	287	351	245	371	236	255	296	294	181
110	278	472	94	393	210	136	336	486	423	367	396	454	276	161	364	403	250	217	480	58	515	386	463	539	246	363	461	748	265	387	254	96	384	670	265	337	374	269	231	279	334	491	293	316	225	214	231	251	72
111	448	447	263	286	348	159	225	445	430	457	337	470	422	156	346	395	210	273	550	110	529	476	385	606	158	436	475	681	328	596	311	124	567	536	322	370	327	253	189	88	260	437	230	381	280	214	332	351	84
112	437	547	164	338	318	82	198	384	435	397	379	449	414	172	433	396	201	206	449	226	491	474	521	509	102	462	497	749	295	424	267	244	355	546	240	394	383	251	203	135	179	370	198	157	160	328	334	354	228
113	678	751	228	146	497	276	215	458	300	548	398	567	382	152	352	428	257	209	493	126	513	372	407	609	232	343	501	798	287	486	282	128	454	502	266	284	477	179	254	167	151	328	288	321	239	244	352	229	160
114	696	943	217	304	575	166	311	445	385	400	312	391	473	262	406	455	196	263	333	121	589	550	570	649	309	336	596	646	227	505	179	114	411	479	373	198	529	220	256	122	213	473	216	302	315	293	280	391	71
115	610	834	315	328	579	148	220	490	373	411	331	482	349	198	286	404	254	254	443	119	626	520	665	700	324	362	448	701	328	598	341	141	470	442	429	267	403	206	221	248	236	403	302	297	218	284	306	388	253
116	724	915	234	378	531	244	263	493	407	433	418	359	362	127	400	439	227	368	430	161	593	438	736	544	295	466	418	534	251	616	320	238	429	547	238	269	363	312	283	255	307	526	160	291	201	298	290	378	224
117	715	855	178	248	605	279	413	457	329	495	336	439	357	105	433	451	131	268	327	146	694	455	668	758	345	505	518	881	270	564	173	128	353	634	306	285	332	237	226	210	273	395	241	369	242	258	361	344	200
118	761	822	255	299	653	255	290	457	422	443	395	404	341	36	404	402	208	291	465	98	669	471	650	431	306	406	477	780	262	484	178	201	300	624	285	382	403	261	234	188	194	403	418	323	201	236	369	401	148
119	639	875	231	308	543	103	309	468	482	481	325	278	394	214	328	322	254	366	445	98	581	340	626	637	277	423	420	731	243	539	216	197	439	455	311	343	356	245	248	133	166	384	340	370	176	344	338	429	59
120	595	863	300	362	640	288	259	547	508	501	326	374	356	120	425	512	238	352	392	81	552	434	690	510	381	431	527	659	308	509	227	148	429	484	206	301	287	347	227	265	166	343	231	361	201	286	277	460	198
121	726	930	300	307	607	229	295	517	418	707	390	395	301	248	498	466	259	460	429	195	584	386	650	717	297	433	452	814	256	505	190	215	454	499	370	284	334	176	189	169	234	368	271	256	280	377	321	525	207
122	588	719	349	400	617	231	380	553	420	555	312	426	390	166	424	400	200	340	371	199	499	498	733	608	316	328	522	790	289	563	211	241	499	509	281	304	375	204	289	10	259	480	279	308	196	252	337	468	202
123	733	832	265	457	592	365	290	542	352	608	393	348	429	125	446	475	199	329	479	190	461	494	656	609	322	431	669	857	239	476	199	209	503	560	328	300	338	300	310	204	221	435	346	266	154	286	333	579	152
124	702	811	234	293	475	195	351	376	528	500	396	460	340	209	448	413	287	384	398	119	724	452	715	708	257	362	567	898	190	516	225	102	459	553	365	287	249	202	213	190	213	420	299	282	206	331	228	511	110
125	589	684	275	383	342	197	329	409	385	650	265	415	343	81	465	395	250	368	358	105	545	574	629	656	313	435	536	888	291	621	258	174	434	583	256	295	409	322	257	168	202	367	349	405	146	369	372	500	172
126	613	650	324	400	630	65	187	605	341	440	459	371	419	167	504	493	243	329	429	33	591	467	761	578	380	414	461	830	243	545	117	178	352	437	331	224	393	293	160	180	175	433	218	248	213	292	364	683	257
127	520	620	325	311	427	218	290	455	388	541	516	368	390	220	492	450	199	437	454	131	605	593	778	682	334	390	457	747	342	509	327	251	496	317	312	286	308	319	224	301	244	518	232	503	198	272	344	441	239
128	599	529	228	497	536	135	328	450	469	553	311	492	329	197	540	363	171	341	509	131	551	551	714	526	396	275	401	751	316	560	383	126	550	415	269	331	316	240	214	212	175	411	279	331	197	280	369	473	235
129	635	485	247	602	526	304	468	457	366	442	438	463	388	163	481	429	244	406	596	107	506	485	751	633	431	311	474	928	288	570	259	158	563	478	376	323	341	231	242	282	175	395	297	591	239	224	309	541	352
130	510	576	322	508	539	151	421	457	499	463	424	385	359	201	492	527	208	334	549	231	636	461	750	477	443	467	500	896	163	557	199	141	395	435	320	264	349	245	209	155	217	504	277	352	253	234	340	505	235
131	573	640	176	512	424	199	427	541	360	398	477	401	328	334	490	514	185	354	628	183	490	388	550	454	432	411	578	763	239	591	303	148	428	489	389	283	407	404	174	136	121	425	241	378	241	243	300	600	287
132	506	481	319	556	485	123	312	485	389	457	349	397	345	152	494	524	206	304	545	93	577	439	798	502	460	435	507	667	280	499	287	156	613	412	194	233	426	274	237	156	256	490	281	409	217	204	330	438	276
133	465	511	256	510	405	233	323	330	637	646	388	434	281	102	508	744	187	265	561	130	546	497	664	682	417	410	592	958	322	482	201	137	550	483	389	227	277	307	293	204	282	310	369	339	221	169	275	593	288
134	458	571	178	427	396	237	314	344	478	390	418	436	372	77	460	582	200	250	503	202	577	411	478	634	434	458	641	834	237	419	224	177	465	410	505	207	388	311	214	205	258	554	395	521	213	226	406	606	334
135	404	566	194	564	319	236	364	462	516	494	379	383	363	173	509	717	266	367	452	120	641	546	589	512	480	371	357	694	249	410	249	200	459	417	443	225	335	224	242	272	218	455	384	398	235	170	420	430	242
136	512	476	341	490	361	255	392	497	421	483	288	393	381	75	441	659	241	231	510	90	582	461	728	507	293	533	627	859	237	516	185	159	385	549	474	238	363	383	273	235	198	505	340	328	340	182	313	571	315
137	377	480	216	431	477	326	414	417	492	427	314	413	455	172	410	728	202	245	497	176	505	463	682	541	359	331	471	750	336	548	268	238	439	527	554	305	314	305	282	170	239	463	469	444	183	293	361	605	254
138	567	399	313	558	445	231	418	553	442	412	350	395	371	101	404	735	269	244	541	219	458	492	510	539	400	334	555	838	307	449	320	163	456	504	379	272	325	304	249	220	209	512	411	325	211	178	320	552	319
139	559	621	260	407	467	241	391	426	370	493	286	408	435	63	480	783	231	369	442	159	616	366	612	452	526	418	498	645	272	491	301	219	533	495	475	187	330	366	227	197	352	348	412	335	180	209	292	524	362
140	472	437	267	548	497	266	486	515	437	435	337	393	420	148	462	820	220	319	406	51	458	388	507	607	331	431	503	903	263	506	279	188	422	575	386	292	268	337	207	144	175	467	451	330	164	227	371	657	298
141	381	585	122	501	572	220	321	515	434	476	392	523	379	183	408	652	178	264	506	84	486	504	519	457	214	383	467	743	245	457	258	224	496	483	417	309	307	330	268	224	305	413	413	334	212	198	347	518	335
142	457	314	253	541	502	215	351	552	419	491	427	547	443	170	411	592	220	335	487	150	591	466	625	418	386	389	415	982	262	437	230	235	476	570	292	212	352	332	238	197	265	390	383	334	247	113	348	522	255
143	465	554	255	594	466	136	353	435	461	380	368	417	307	99	435	607	226	243	438	106	468	379	630	573	349	413	439	938	327	556	327	169	462	585	438	319	410	282	263	301	287	502	445	422	168	272	360	505	183
144	409	368	257	498	444	283	451	504	476	407	455	462	293	168	382	552	258	332	465	157	541	517	609	440	285	446	505	913	281	489	279	269	448	515	503	277	392	302	161	331	246	318	377	313	114	216	400	465	268
145	422	367	357	514	558	115	399	497	379	422	350	503	479	111	516	647	250	243	532	138	493	445	517	635	259	294	608	645	311	540	231	230	512	529	320	243	331	399	216	218	316	436	401	315	233	245	304	522	268
146	318	450	211	555	385	200	391	532	384	506	370	465	432	94	496	779	153	342	566	100	554	412	492	532	254	598	491	708	278	500	323	187	431	543	470	344	397	306	309	152	281	384	436	309	256	173	383	550	339
147	377	408	257	434	485	216	355	499	409	373	336	409	369	121	476	573	198	280	457	144	377	438	582	616	338	443	398	689	276	584	215	279	475	556	503	289	374	292	200	64	247	392	403	375	150	252	381	540	334
148	467	345	247	568	473	410	388	490	376	413	224	387	345	234	447	717	230	217	550	128	522	542	503	485	208	470	441	875	298	397	288	261	496	529	449	330	406	330	335	246	402	399	508	324	138	264	275	438	211
149	375	362	261	429	398	286	423	560	318	546	326	430	469	124	401	710	210	253	544	90	502	408	447	655	292	527	474	829	262	563	212	196	494	571	409	255	307	327	295	97	215	506	464	343	209	328	387	384	237
150	362	433	314	406	429	228	343	593	323	453	377	389	382	205	543	563	258	242	558	41	580	430	526	197	149	313	540	684	251	417	334	149	533	504	325	318	308	292	221	281	191	321	455	530	150	283	383	350	230
151	369	215	297	451	428	153	397	571	423	399	389	361	364	115	528	624	249	232	506	146	556	510	512	443	206	401	414	708	274	561	261	134	397	476	435	294	357	300	337	120	272	487	352	379	289	307	375	406	261
152	327	273	295	524	422	209	385	473	416	454	441	365	310	219	441	473	282	227	634	117	567	468	430	482	160	486	620	736	315	490	184	133	542	564	408	358	372	241	247	113	242	434	487	458	267	209	299	399	280
153	424	386	267	513	397	222	431	460	282	421	409	398	381	259	466	608	224	317	636	184	489	357	493	547	216	508	445	647	228	393	232	257	431	447	383	331	414	213	257	115	241	485	479	394	193	196	311	279	223
154	389	296	265	527	414	293	411	484	375	487	322	441	347	163	279	528	241	228	630	154	448	413	540	522	402	513	521	626	265	494	260	250	508	444	403	266	357	307	233	115	274	380	427	486	246	233	445	477	180
155	272	286	169	456	470	351	523	448	481	536	267	317	406	148	373	595	167	231	555	122	478	415	427	621	207	453	417	686	282	357	236	231	477	600	394	302	322	224	249	164	221	469	433	333	278	148	265	300	246
156	494	260	293	477	417	329	518	648	336	564	409	361	359	134	449	499	246	248	544	159	643	338	507	448	254	377	385	731	264	500	326	238	514	487	369	281	438	308	171	105	259	409	374	330	299	221	311	329	171
157	380	366	296	428	326	347	426	426	334	468	508	380	488	188	415	564	283	230	627	186	481	502	281	527	178	347	389	700	332	440	284	268	498	482	435	228	305	326	252	225	212	390	358	305	232	216	317	448	240
158	364	437	318	398	487	236	556	477	422	513	401	420	415	207	387	517	202	244	609	182	497	530	357	631	205	400	595	653	272	386	147	209	398	486	391	340	397	326	262	138	270	463	375	383	211	226	359	380	142
159	406	288	295	300	562	245	319	459	369	476	353	400	496	190	335	646	249	251	557	182	520	458	416	600	131	460	590	578	303	517	250	173	489	412	408	389	455	222	215	131	291	525	319	350	185	223	302	339	116
160	336	310	98	335	330	207	413	405	379	497	285	459	301	327	405	609	235	286	538	195	499	394	353	574	98	299	534	633	300	434	290	167	479	517	329	173	378	366	205	151	211	441	295	423	202	254	273	265	128
161	400	322	226	236	398	264	376	459	450	481	402	400	386	301	409	426	237	275	544	126	537	417	486	617	232	289	592	581	322	451	360	144	360	451	428	273	280	260	216	186	236	485	304	361	188	229	423	336	14
162	227	393	327	354	305	353	478	532	242	417	373	543	332	87	387	574	306	282	470	45	561	433	447	587	148	362	509	513	232	453	244	235	599	444	379	374	471	275	175	139	226	495	298	285	289	187	346	250	151
163	379	362	345	427	371	120	363	431	346	457	433	422	343	271	412	620	270	206	417	88	538	498	465	578	278	198	438	569	344	449	232	273	527	462	266	240	416	362	209	223	235	635	345	458	261	151	326	336	100
164	368	385	204	384	241	211	402	435	327	553	345	352	287	175	318	553	220	205	637	118	545	391	504	303	215	458	578	541	298	437	249	140	569	390	417	373	394	263	187	123	263	448	377	253	195	171	392	335	115
165	273	332	336	428	348	267	488	318	363	477	436	405	334	161	295	494	307	253	538	228	567	414	667	426	177	372	719	560	286	505	376	235	468	398	304	267	457	227	223	161	289	368	414	309	296	239	371	218	155
166	323	208	164	399	290	239	407	496	416	441	311	350	253	126	378	544	335	253	459	229	483	525	392	487	140	363	551	572	235	523	270	313	394	383	366	248	390	312	149	202	354	404	301	370	217	112	215	244	146
167	354	246	312	410	406	214	357	430	341	317	378	317	343	186	354	498	336	312	455	115	433	412	548	455	57	313	648	606	268	424	275	302	441	383	351	212	400	295	271	158	237	410	333	388	243	266	268	338	140
168	329	221	194	391	407	376	367	442	340	378	324	368	296	183	401	531	329	256	482	160	510	495	631	540	113	298	369	470	296	480	208	190	471	255	426	315	365	282	243	181	200	377	274	427	253	260	352	277	247
169	277	315	228	390	394	224	375	550	337	347	380	376	353	128	366	529	410	200	443	255	518	401	549	386	222	252	575	425	239	518	304	206	481	458	456	240	382	281	240	89	244	373	304	382	194	173	260	266	141
170	348	273	385	325	377	177	391	561	434	414	352	375	439	297	377	416	333	172	455	127	405	479	505	591	188	158	473	569	200	483	236	248	499	420	352	270	401	305	164	78	212	466	273	418	305	226	266	314	80
171	409	290	233	386	294	86	495	435	255	401	450	414	297	150	387	622	501	245	510	120	466	414	639	595	312	348	377	503	277	525	287	245	431	439	412	314	360	338	244	158	210	591	307	459	294	220	234	183	117
172	333	386	273	262	276	182	256	512	357	473	356	299	413	149	354	519	396	333	573	66	432	555	527	504	246	281	538	426	262	503	295	172	351	334	449	262	246	280	220	146	239	425	405	410	227	192	398	345	57
173	219	333	166	354	163	363	449	469	417	444	395	347	324	192	393	570	429	337	483	167	570	462	588	346	276	253	681	461	266	443	369	220	380	431	330	361	325	215	157	198	242	328	238	305	146	176	366	276	146
174	280	316	181	352	234	250	428	397	303	436	363	376	403	118	399	566	343	347	614	173	573	431	649	527	244	205	525	421	277	456	288	297	451	519	475	317	483	228	162	184	240	512	241	323	230	202	350	104	126
175	213	259	382	395	273	167	411	510	295	294	425	437	406	215	277	501	273	263	497	231	492	504	526	468	197	232	432	486	307	535	263	233	423	336	234	217	341	217	268	207	285	505	274	294	247	220	453	317	140
176	253	224	191	345	341	129	389	376	336	411	398	344	406	192	491	586	347	324	448	93	515	449	461	589	201	206	407	341	278	519	220	209	442	391	378	219	377	234	255	105	235	331	293	395	179	189	309	276	97
177	265	358	248	397	346	114	520	409	313	409	313	339	348	95	337	553	250	371	485	141	567	470	511	567	66	162	683	369	238	583	211	183	469	347	418	363	386	200	263	153	150	460	196	372	240	223	472	173	124
178	211	379	247	434	265	38	419	468	242	428	384	472	366	167	290	557	265	305	546	35	555	535	563	319	134	221	516	522	323	473	320	196	486	383	465	386	300	270	233	216	246	492	314	327	287	127	330	171	116
179	236	292	294	329	356	197	430	413	271	387	381	448	327	199	410	460	348	358	499	142	565	393	541	371	216	92	354	412	284	507	262	176	590	389	348	272	316	233	253	282	165	417	355	330	174	253	320	190	152
180	309	362	204	272	403	241	322	441	322	296	348	382	407	160	355	437	297	337	433	120	594	430	385	448	306	191	388	454	369	441	284	130	414	308	344	270	297	247	166	74	318	488	248	456	262	141	405	166	121
181	299	223	257	370	328	178	343	346	284	518	458	396	332	191	378	474	298	275	496	204	545	389	499	483	198	223	402	424	362	595	240	97	547	392	315	260	332	320	290	144	162	479	287	247	260	98	375	273	189
182	336	235	304	292	416	252	318	317	351	466	408	322	362	120	337	404	237	374	437	104	585	454	447	428	194	154	394	287	258	341	315	257	576	342	336	246	460	201	250	138	150	516	316	344	231	225	363	292	142
183	270	275	251	349	369	242	369	418	302	447	301	348	354	93	233	353	346	312	488	286	514	473	520	592	165	138	378	486	297	408	310	256	619	369	327	301	430	172	200	173	226	465	244	317	249	134	332	180	153
184	309	305	298	374	335	71	372	490	373	345	367	317	384	209	437	567	306	415	446	121	489	388	589	473	205	333	573	360	295	346	224	147	578	275	308	296	358	313	162	198	179	501	364	323	147	215	315	213	89
185	194	218	250	297	341	240	339	548	290	422	407	415	397	208	367	481	301	240	563	117	509	403	572	465	163	238	278	461	276	506	343	200	485	272	328	355	358	230	168	149	359	435	314	295	250	246	380	223	209
186	321	314	218	275	351	238	536	528	339	361	379	377	320	124	333	456	313	325	520	139	577	467	487	450	182	241	376	483	279	536	276	228	540	451	294	303	382	302	175	209	224	461	322	322	242	152	409	275	142
187	283	267	302	365	257	124	409	446	302	493	494	361	279	166	324	432	322	373	443	159	524	487	406	463	123	266	598	334	245	586	290	313	456	323	369	287	376	254	206	227	234	404	262	312	194	233	504	245	96
188	399	386	165	263	280	220	454	450	339	373	355	374	342	143	430	387	265	220	424	220	578	444	518	472	243	247	446	335	291	357	264	169	495	293	381	195	360	198	228	163	188	486	249	250	305	292	386	190	131
189	372	335	311	296	298	269	408	448	364	481	351	508	437	150	381	415	324	370	498	55	557	411	550	578	148	332	417	431	318	419	339	207	500	323	298	313	347	198	230	184	291	543	329	298	251	136	385	220	163
190	295	265	274	251	317	221	385	513	336	408	404	340	370	11	357	511	235	334	530	160	565	470	383	429	177	309	582	472	212	350	333	179	523	275	234	223	411	180	211	168	279	567	309	310	148	248	434	211	104
191	250	311	224	331	232	219	298	591	291	466	363	305	421	164	385	472	181	274	405	240	568	407	422	549	203	206	470	499	226	539	204	135	413	366	310	311	384	305	185	147	236	456	350	258	193	235	314	231	144
192	254	337	256	296	256	274	501	489	215	386	418	338	418	184	324	526	191	274	383	139	536	457	402	473	156	260	451	538	187	489	220	186	504	232	331	278	426	263	212	160	144	509	273	380	162	252	441	198	159
193	260	313	84	406	266	232	320	388	334	362	412	472	313	198	389	363	321	306	444	128	538	470	430	425	193	384	391	501	299	505	187	163	416	302	313	247	370	202	285	240	251	476	391	307	200	171	431	294	178
194	333	265	289	353	386	142	394	506	291	334	422	399	371	143	349	464	189	273	311	173	329	456	319	614	103	152	427	474	258	524	263	147	437	353	362	278	486	245	263	176	230	432	195	297	258	155	328	274	191
195	339	307	178	306	241	259	531	597	333	396	369	366	407	209	352	442	334	210	324	100	497	499	461	420	200	140	408	541	281	366	282	233	457	360	339	335	412	179	300	171	197	555	294	354	194	204	564	255	95
196	363	291	178	343	241	134	369	512	323	443	252	371	400	253	354	461	196	413	419	78	470	414	472	397	169	167	508	678	255	388	288	219	350	263	253	291	369	177	231	180	192	420	271	358	263	106	523	252	117
197	306	338	263	387	274	153	424	402	304	405	316	408	394	208	398	488	386	313	380	177	575	524	574	409	93	274	528	558	267	456	199	331	558	184	309	319	370	123	177	166	242	428	221	456	226	205	541	165	65
198	452	248	247	319	398	61	438	447	305	429	436	363	240	158	427	562	278	445	334	173	584	468	483	430	198	133	638	446	279	410	227	108	548	266	336	307	481	247	247	209	282	456	253	309	236	271	358	226	223
199	363	238	172	403	284	207	405	465	449	378	294	448	375	95	442	586	369	474	349	51	550	471	485	566	133	228	497	519	397	385	213	166	486	207	392	363	397	271	168	134	229	594	285	345	167	220	302	206	166
200	532	297	277	305	313	176	355	484	335	404	473	474	312	132	409	545	175	458	291	141	525	474	474	356	249	233	550	392	274	390	315	308	376	233	304	332	225	246	223	143	141	520	221	330	247	155	503	228	74
201	384	279	225	279	385	118	501	539	319	381	402	360	397	252	439	617	264	435	285	45	487	403	494	448	119	180	392	537	197	450	224	241	450	218	320	305	413	182	176	128	161	500	236	352	167	235	522	169	108
202	428	213	220	418	285	330	446	493	393	335	387	374	410	134	376	484	278	385	320	100	525	475	402	433	179	262	415	428	301	417	313	64	550	323	261	329	300	293	212	175	256	455	171	219	259	306	496	173	163
203	317	250	378	410	338	177	339	431	278	446	374	434	352	175	350	604	227	428	378	113	607	502	393	427	128	143	569	493	263	498	232	161	465	280	262	292	331	220	205	212	300	397	284	307	257	268	367	127	158
204	371	233	334	362	309	207	301	435	310	273	435	433	352	236	399	596	338	410	270	67	607	520	436	369	18	254	361	334	241	429	221	99	499	227	384	353	355	230	273	85	313	470	283	307	177	290	440	235	159
205	260	209	186	306	385	165	458	408	318	330	380	264	385	189	371	643	231	492	328	129	454	429	388	392	253	226	444	341	263	326	188	163	390	235	313	178	382	231	225	294	258	377	265	336	188	198	360	181	130
206	366	243	140	284	341	232	398	507	347	291	406	393	381	138	330	608	261	438	258	240	510	432	357	531	119	96	471	465	320	327	239	96	343	201	268	329	401	321	161	247	320	441	329	340	208	156	506	259	219
207	381	240	215	374	274	177	485	398	429	321	497	344	404	204	338	618	324	489	267	54	427	404	452	443	140	116	563	374	287	377	350	178	550	347	170	292	401	351	202	132	304	518	231	317	116	172	502	172	153
208	229	225	348	341	281	166	347	484	279	399	299	379	300	188	359	491	224	417	274	136	517	440	448	361	237	-17	302	415	306	331	229	195	490	288	327	242	387	333	271	198	277	503	327	376	293	190	448	199	311
209	371	252	209	471	264	239	335	561	356	489	403	396	303	189	235	561	377	393	280	132	507	543	239	298	230	377	520	415	289	345	324	160	515	287	329	259	331	331	225	186	339	533	234	341	161	174	455	207	90
210	248	270	254	419	219	251	392	366	260	307	465	272	412	229	337	569	305	297	227	214	527	425	230	450	265	379	580	584	335	425	210	299	360	239	334	252	465	197	226	125	116	480	273	249	154	95	523	261	173
211	318	367	334	327	278	396	185	442	303	310	329	423	346	117	358	504	228	453	278	221	585	482	276	518	145	330	480	472	258	339	261	231	416	271	304	252	339	271	243	167	285	543	320	283	236	177	518	120	105
212	272	302	288	303	396	200	314	439	261	300	313	365	401	165	331	459	179	408	226	139	610	533	307	510	248	340	490	465	226	440	191	269	424	265	389	353	270	236	263	256	239	342	369	266	153	266	471	195	201
213	247	326	290	300	241	265	391	439	262	354	326	444	337	172	371	527	125	350	335	141	658	448	199	469	106	421	525	418	293	336	303	140	493	210	265	228	405	273	215	213	265	683	233	308	234	158	485	147	135
214	291	151	224	395	298	181	377	477	302	365	297	405	355	151	295	483	203	326	166	92	577	434	394	548	173	520	525	359	269	415	231	227	418	216	243	205	347	337	205	148	222	489	248	374	150	252	359	264	122
215	348	182	74	402	285	268	332	402	318	331	381	410	363	236	295	467	273	409	183	164	668	431	611	545	145	380	508	445	369	312	296	224	380	246	361	267	306	257	189	114	234	460	161	449	105	75	476	167	83
216	337	232	256	420	391	170	349	479	164	313	426	366	328	194	311	495	221	362	250	67	626	528	504	514	210	390	457	433	236	313	222	195	551	220	255	294	389	313	120	170	95	454	254	291	216	205	509	156	96
217	306	245	268	410	276	193	336	480	276	316	305	369	374	263	442	420	264	326	177	186	582	576	501	515	76	263	443	403	249	496	129	153	419	183	209	207	290	304	125	119	212	508	218	329	247	132	318	158	129
218	174	412	179	377	360	211	320	508	265	387	317	401	305	167	296	568	189	325	221	170	541	409	631	471	272	329	460	337	299	334	329	156	382	287	178	261	433	189	237	213	191	389	204	394	209	182	529	164	173
219	198	211	271	365	218	186	352	540	351	295	395	338	331	309	334	327	150	353	197	74	578	491	382	449	163	448	540	479	156	370	295	147	492	209	345	267	424	283	173	171	295	454	178	241	207	105	478	200	132
220	308	329	157	456	312	218	403	434	304	321	394	411	259	134	367	478	250	385	217	155	604	342	568	445	234	470	428	409	203	348	246	281	405	248	276	364	410	155	244	199	173	412	214	285	235	170	405	267	151
221	251	266	214	237	292	246	291	557	118	314	492	387	353	138	396	432	297	360	168	176	715	443	390	378	175	257	464	479	277	491	228	62	328	286	240	304	415	214	208	186	239	381	226	309	222	210	357	300	195
222	320	248	248	305	226	174	300	497	268	317	391	376	380	65	316	454	255	323	281	156	553	516	497	408	198	468	520	400	290	331	268	200	363	222	357	259	416	266	184	152	234	402	178	363	252	178	464	136	107
223	298	241	230	319	354	185	321	389	234	319	402	252	305	197	261	412	186	344	225	78	542	494	556	558	230	316	503	383	235	253	260	89	486	229	199	264	336	284	160	188	281	422	278	419	228	196	466	221	108
224	318	210	304	318	414	129	237	613	227	288	467	302	343	220	239	409	163	196	192	118	538	391	448	420	259	335	424	305	220	369	255	111	359	162	373	274	396	233	191	207	232	533	144	295	169	246	366	231	215
225	273	284	170	294	359	299	344	469	346	299	396	452	301	185	242	385	227	231	189	67	587	501	478	547	217	274	366	386	252	497	155	178	396	262	274	263	408	352	231	204	204	442	280	325	178	161	422	159	87
226	409	243	233	329	301	208	252	469	284	312	398	486	361	170	400	601	261	226	166	204	570	488	518	296	140	457	524	426	281	398	245	223	444	261	244	418	319	217	230	157	196	446	261	366	238	130	391	214	171
227	337	296	171	219	283	141	363	504	320	303	383	390	317	189	401	477	108	194	186	105	328	487	377	486	122	316	489	463	230	410	321	183	327	347	287	259	296	285	292	146	277	531	155	365	254	109	476	135	24
228	269	392	268	358	294	226	266	491	215	275	349	499	340	250	356	426	158	416	154	128	498	442	428	564	218	429	417	455	201	315	344	104	375	238	320	144	343	278	240	224	186	469	166	358	281	140	544	233	86
229	291	200	169	396	250	204	271	511	264	314	494	352	349	97	407	552	193	351	271	113	599	330	317	336	127	581	412	413	296	416	315	104	544	289	340	253	387	389	158	170	232	409	219	304	231	212	406	211	183
230	342	290	318	400	239	298	180	459	234	360	396	452	333	61	340	365	185	186	236	76	595	455	369	593	179	510	420	362	301	419	245	139	390	173	332	379	537	204	216	167	178	344	308	299	293	225	337	166	99
231	321	252	102	310	257	303	306	369	372	348	309	390	295	246	351	424	225	313	149	128	564	406	330	560	157	574	529	301	257	473	234	132	477	231	231	288	379	276	249	123	249	420	218	291	175	192	477	84	132
232	363	389	313	286	301	274	315	521	284	371	408	402	337	233	451	351	198	271	155	168	599	430	397	443	198	537	425	346	220	419	169	196	331	178	275	232	363	208	293	126	266	490	195	268	246	177	370	288	147
233	354	260	138	404	226	114	262	510	341	353	311	514	338	139	364	441	299	281	231	144	602	437	310	654	83	523	565	406	255	408	319	97	432	211	369	326	281	173	172	268	174	517	140	308	196	225	431	189	88
234	304	265	237	417	215	416	277	418	317	327	371	467	363	115	321	497	211	347	230	58	582	401	391	650	195	473	424	319	272	343	290	193	396	184	264	318	340	238	239	170	286	454	241	328	264	228	399	252	107
235	270	263	306	424	274	193	340	457	204	384	350	440	353	256	364	375	255	261	152	74	528	507	417	455	145	356	542	364	305	344	328	187	345	180	314	349	382	234	159	220	136	460	207	252	215	207	376	121	122
236	294	309	180	256	357	344	202	412	229	294	375	479	222	151	295	422	154	214	176	89	603	453	353	621	227	389	688	410	258	342	346	144	477	167	185	246	323	250	282	236	162	486	270	292	255	178	323	140	46
237	301	233	239	360	271	244	317	476	238	370	327	407	401	89	436	328	214	301	189	32	503	331	348	610	220	199	474	334	209	332	217	185	321	255	333	293	479	218	138	94	233	561	270	373	249	145	363	161	76
238	305	307	179	367	293	333	359	568	307	315	338	457	329	175	362	521	259	250	134	203	590	503	311	549	190	415	687	392	253	245	234	183	423	151	296	247	433	200	191	244	375	492	328	342	225	187	402	181	143
239	360	248	179	262	292	202	309	451	213	228	322	373	375	153	357	514	244	306	151	176	599	467	273	527	128	376	470	359	313	338	286	171	322	297	287	157	303	220	284	197	266	565	168	346	265	160	378	235	113
240	354	350	316	324	423	216	269	475	337	380	364	570	403	166	332	345	187	403	227	140	612	561	455	625	213	509	546	388	239	383	316	168	415	321	348	310	310	268	207	170	293	448	165	290	216	91	472	206	104
241	191	283	234	386	338	226	386	442	255	402	336	441	354	254	375	390	286	251	259	171	485	483	339	575	198	378	402	337	333	309	182	138	518	221	268	218	376	214	200	193	229	394	236	361	192	227	365	255	88
242	301	205	141	335	389	230	220	502	322	250	287	384	335	235	337	463	108	340	126	89	515	356	433	610	83	398	309	307	334	364	205	173	375	292	272	248	387	213	271	156	189	461	277	249	204	175	367	71	232
243	335	174	197	317	341	279	383	521	259	360	410	452	384	228	316	398	180	240	141	175	529	506	433	592	84	515	512	287	350	406	278	192	476	219	319	242	403	240	280	339	260	464	254	214	350	148	389	168	110
244	245	309	231	349	230	181	338	557	164	283	295	343	328	139	290	408	185	287	217	194	516	416	258	543	136	389	434	433	235	396	296	135	422	262	294	266	362	309	134	228	245	535	204	309	189	219	274	183	122
245	357	202	310	355	260	196	248	362	218	245	431	364	345	91	347	373	233	168	202	161	544	409	432	449	16	381	374	306	292	307	200	283	331	228	240	270	363	253	135	145	176	439	381	292	263	61	397	213	108
246	297	353	285	277	213	209	343	430	287	341	294	526	410	156	421	451	267	246	171	99	489	475	403	611	242	388	556	378	323	392	206	93	362	189	166	281	401	300	201	127	197	448	297	327	185	197	360	199	133
247	232	195	275	289	352	261	275	466	252	293	382	422	374	239	434	492	159	226	184	179	527	471	478	481	207	310	451	389	167	285	255	153	475	244	269	320	340	254	162	223	189	461	296	380	287	163	393	224	58
248	317	265	209	402	205	312	246	495	334	209	312	442	397	80	342	415	117	278	164	203	557	513	284	538	186	390	507	415	338	280	313	195	451	260	358	407	298	215	213	118	213	457	226	264	182	203	262	225	87
249	336	226	219	327	-2	207	234	469	175	305	400	428	280	202	259	348	191	305	133	187	586	550	392	529	187	313	586	363	238	319	317	201	351	123	247	262	346	292	226	177	286	396	257	273	263	205	243	203	221
250	305	219	252	201	249	348	348	424	250	277	284	468	289	178	311	501	181	297	130	158	493	467	386	510	200	259	448	301	273	341	240	168	387	245	309	319	309	189	133	152	292	524	279	316	229	182	396	228	160
251	405	208	190	362	268	313	280	477	375	391	306	417	446	159	486	405	192	231	199	161	540	506	517	488	240	327	484	398	193	514	250	166	384	285	320	348	288	278	219	226	247	470	311	221	275	207	407	189	247
252	413	343	238	391	233	320	294	517	278	361	329	357	252	149	299	539	156	265	158	71	477	541	362	530	123	272	501	326	277	255	286	200	406	193	260	320	290	209	183	140	143	592	264	308	197	81	270	99	100
253	281	263	325	267	268	200	218	485	271	431	291	360	343	168	325	434	193	244	196	133	541	444	449	488	164	346	470	398	327	330	234	89	431	242	270	362	396	321	195	154	326	505	274	387	172	154	306	183	143
254	316	167	142	324	218	335	136	453	156	260	447	352	388	214	274	424	214	159	135	148	420	461	417	452	132	345	375	225	305	359	286	116	399	200	348	346	406	236	178	109	264	525	171	359	243	159	287	150	230
255	381	258	254	345	324	213	285	476	189	220	385	398	366	160	433	502	217	289	152	139	394	453	373	462	143	490	675	302	333	305	271	84	381	259	230	224	348	249	240	182	244	399	233	321	148	179	282	128	133
256	195	285	289	288	264	252	179	432	227	326	388	423	369	119	385	387	175	179	226	167	577	516	316	471	83	443	459	341	355	346	258	140	353	127	260	184	358	121	221	250	278	456	279	249	248	184	438	280	139
257	269	290	145	322	180	229	189	548	317	282	380	447	353	155	366	320	210	198	180	217	594	376	314	545	210	416	413	275	267	420	307	127	493	278	288	314	257	299	233	94	249	419	167	406	240	181	405	244	142
258	220	277	272	344	315	159	133	374	357	416	479	323	374	218	392	386	249	156	164	167	502	580	435	517	158	237	560	324	304	332	266	181	386	201	227	269	376	347	178	117	168	402	152	300	190	238	414	191	99
259	375	259	237	254	243	288	281	509	270	262	410	435	328	207	303	403	249	184	172	123	513	432	382	531	94	345	548	412	215	406	365	116	433	220	380	212	317	344	148	136	195	517	173	344	161	227	411	191	207
260	304	373	295	374	205	180	280	418	232	305	356	331	282	126	334	440	118	250	185	210	500	469	293	530	76	239	520	326	323	299	294	224	406	176	291	300	323	173	204	101	204	566	291	277	152	134	369	225	147
261	324	148	273	416	281	248	345	475	284	277	359	381	316	90	388	372	241	239	252	51	562	514	393	392	245	339	514	424	341	390	262	169	397	238	237	291	438	290	173	181	231	522	181	260	142	180	391	237	233
262	272	220	239	280	244	317	309	477	281	229	388	415	377	142	407	406	167	176	121	209	590	416	446	463	72	329	561	319	196	298	245	155	439	242	175	296	333	263	206	172	307	520	290	357	132	145	370	222	209
263	282	269	257	402	405	258	221	529	325	389	400	487	385	222	304	471	195	277	199	194	560	511	253	507	131	429	536	324	303	429	257	111	390	225	264	259	364	233	228	106	236	383	188	273	229	156	300	13	107
264	259	171	183	389	192	184	330	518	263	247	446	361	423	202	309	358	234	156	103	164	502	508	501	495	158	292	556	285	283	296	287	128	422	132	312	261	377	294	243	233	217	579	283	358	308	67	318	153	56
265	388	284	84	204	306	180	394	416	223	315	394	382	362	159	285	489	188	234	160	42	559	544	361	595	157	398	592	424	249	431	331	102	365	98	276	285	317	218	244	194	348	531	239	325	171	220	398	217	156
266	276	197	262	364	326	281	343	397	212	389	353	451	326	209	364	487	206	154	110	50	499	423	448	428	12	257	491	295	237	301	199	87	440	241	240	269	398	188	291	146	257	524	240	336	249	149	470	233	120
267	320	211	239	218	364	222	282	447	227	246	335	407	403	176	311	449	193	133	228	174	453	389	389	511	149	422	453	474	263	256	228	101	471	273	379	194	339	282	118	232	290	615	288	339	256	148	478	229	104
268	328	314	208	495	352	288	254	421	249	315	291	351	252	199	358	367	165	249	188	28	508	485	388	394	164	431	488	408	303	235	430	162	380	263	380	303	410	263	219	164	253	388	253	288	305	170	390	288	128
269	316	193	95	217	316	311	252	452	251	368	390	334	335	137	304	370	305	255	157	156	544	456	381	504	109	341	609	556	274	420	360	234	476	184	192	308	444	267	202	248	248	465	362	300	209	168	312	118	149
270	275	290	78	307	408	315	298	346	375	353	283	478	444	117	410	452	168	215	174	124	642	418	367	453	196	287	517	292	378	348	231	142	463	199	205	248	359	175	231	59	250	553	165	317	200	244	314	154	188
271	390	351	239	337	423	303	313	355	149	394	337	419	343	219	374	456	256	274	94	138	537	475	409	298	137	293	434	443	248	361	269	231	402	275	273	289	342	183	237	125	211	567	162	282	243	241	339	271	127
272	319	236	111	402	419	303	383	525	269	284	371	330	486	82	274	431	279	206	132	248	537	567	535	480	99	399	512	372	217	307	289	200	394	255	312	306	248	223	221	246	149	427	139	329	279	277	322	147	146
273	166	177	256	373	291	186	262	368	297	296	351	314	312	163	277	398	183	229	143	101	419	400	366	590	214	475	564	317	326	388	210	153	439	266	256	242	403	219	151	247	165	440	227	305	206	223	434	195	116
274	355	322	236	208	394	254	341	524	171	202	395	425	387	116	397	449	169	138	132	184	485	531	463	585	182	382	484	423	245	426	305	108	434	245	364	242	411	310	121	179	227	477	209	317	274	189	332	115	202
275	223	219	228	417	345	309	318	454	231	299	342	355	233	207	394	420	160	146	128	27	389	454	362	503	191	267	510	409	253	383	279	155	512	193	378	330	269	386	269	220	271	568	230	282	253	112	399	129	135
276	321	296	283	305	299	335	246	417	304	347	588	312	403	132	272	411	153	186	181	153	503	454	382	497	138	224	495	303	215	227	301	92	333	212	378	261	280	208	219	235	163	546	151	268	292	137	271	185	214
277	261	213	240	460	202	212	253	439	355	274	286	426	382	197	380	458	155	124	222	182	495	459	390	503	154	271	444	374	253	221	304	73	435	176	196	247	360	192	208	124	163	542	200	379	297	205	294	167	224
278	266	261	215	329	296	239	294	534	240	335	442	466	391	165	329	385	160	187	129	128	649	476	433	542	147	283	509	359	278	246	253	154	458	147	241	330	388	276	135	194	243	412	157	423	259	208	297	124	202
279	341	323	150	318	355	183	261	456	335	251	432	348	321	196	370	523	93	268	38	178	598	584	275	541	161	295	339	438	406	180	195	155	466	195	204	225	350	220	213	218	278	560	186	309	206	192	352	199	76
280	290	191	250	343	399	277	190	379	263	271	336	373	348	194	322	490	196	153	229	65	579	376	434	556	141	388	473	468	367	258	171	37	566	206	202	338	447	222	146	168	247	496	282	345	217	217	380	178	123
281	365	321	319	291	254	200	316	348	190	391	447	337	332	120	300	471	114	179	92	153	504	470	333	370	14	294	586	375	288	336	125	142	398	103	389	228	427	239	213	116	269	549	233	356	246	32	372	158	183
282	246	211	169	482	396	202	318	451	287	300	336	298	405	62	287	384	283	150	149	62	414	685	457	466	206	263	528	260	402	161	285	186	501	203	252	174	341	241	285	153	246	548	186	398	190	192	323	77	210
283	242	239	178	286	223	215	241	464	152	225	494	420	307	122	429	499	210	125	201	210	382	471	341	505	154	445	522	248	285	396	277	131	437	242	310	332	331	232	259	237	222	501	277	232	269	164	235	104	243
284	353	368	394	359	411	205	233	566	290	294	342	497	478	120	434	409	205	254	129	160	651	422	389	463	166	426	446	436	249	323	301	130	458	217	262	276	322	232	339	180	291	402	329	313	189	115	454	215	206
285	243	271	261	358	280	211	266	414	287	433	360	264	326	115	218	453	139	189	197	145	322	475	493	672	184	422	562	337	282	285	238	161	460	166	299	297	431	232	158	239	151	529	270	200	222	82	323	242	225
286	222	132	294	351	486	218	285	370	340	325	252	374	370	83	397	498	196	242	181	265	549	491	449	479	123	363	596	398	307	293	280	222	384	131	312	330	401	227	230	229	335	485	194	302	195	232	317	154	119
287	229	224	159	274	354	345	332	435	251	324	263	239	328	174	394	503	134	122	183	186	567	498	416	395	147	399	431	382	295	342	166	164	520	184	237	290	310	170	188	180	180	541	243	250	299	166	361	194	153
288	272	357	280	339	205	174	332	634	347	389	407	419	356	272	379	403	54	170	138	110	618	513	310	368	201	302	419	368	298	267	269	148	425	315	187	246	386	278	251	224	280	382	257	320	170	144	384	165	138
289	215	162	231	283	318	143	275	503	303	271	294	321	353	184	411	397	217	191	89	80	518	563	302	379	49	355	355	445	194	282	222	119	365	199	366	275	323	305	199	225	150	518	255	290	217	175	429	229	110
290	287	126	174	477	315	142	191	520	263	279	430	294	356	126	311	433	250	145	145	169	468	415	360	324	118	601	567	323	245	463	257	197	455	240	318	287	389	291	189	256	359	513	274	347	213	132	214	176	54
291	192	238	257	314	353	231	243	430	295	373	437	325	263	148	460	437	226	87	192	118	587	451	340	541	239	339	477	368	340	375	318	182	449	288	251	372	338	239	246	251	254	470	302	275	226	117	246	152	108
292	354	209	360	323	408	226	271	568	241	242	348	323	404	155	309	398	211	194	154	106	348	403	529	562	288	382	470	379	227	166	237	110	349	77	281	163	306	228	217	124	239	547	312	242	230	189	354	268	236
293	277	162	198	457	340	201	261	442	290	288	445	304	333	215	350	564	304	175	164	178	484	513	317	414	198	422	446	358	210	311	298	228	377	152	304	419	350	117	170	137	256	539	195	172	282	84	360	292	111
294	343	240	198	322	303	274	317	487	145	329	256	359	328	268	345	551	161	145	75	185	469	384	477	502	198	347	376	340	241	225	199	341	408	346	220	187	343	337	230	162	134	452	336	287	225	215	388	164	180
295	267	245	262	158	402	158	369	354	319	360	386	331	404	174	382	360	268	170	115	129	475	322	389	444	172	304	402	374	217	317	272	176	438	336	299	290	419	210	246	153	151	452	249	270	259	91	580	199	80
296	250	160	219	493	416	108	380	504	348	355	264	287	374	179	349	358	170	116	55	179	525	520	425	573	98	403	490	439	270	273	275	161	505	175	178	346	358	193	153	173	154	609	192	250	229	177	262	118	176
297	274	154	270	346	303	330	323	450	165	305	484	425	315	99	322	359	109	132	247	161	410	411	344	259	84	339	486	345	247	384	202	145	509	250	222	238	356	213	288	190	220	442	317	266	205	231	310	316	83
298	205	219	343	398	257	314	315	398	244	270	330	405	444	130	335	457	201	129	226	171	480	461	354	463	171	397	409	394	376	287	194	165	545	223	294	290	325	185	205	149	263	670	215	330	155	131	276	165	112
299	334	142	272	328	274	286	319	523	310	355	402	284	399	301	360	366	197	219	186	200	528	583	294	504	220	406	429	401	276	275	155	95	339	162	242	282	321	202	138	250	229	593	221	343	262	225	291	179	133
300	215	157	300	418	341	187	383	546	333	257	303	427	430	196	357	349	184	183	266	213	518	437	313	363	152	396	478	327	276	351	268	102	342	238	325	248	271	283	250	111	324	466	330	266	214	159	410	229	158
301	247	289	198	253	367	234	277	425	324	217	362	293	294	41	367	417	136	107	262	153	557	485	323	383	213	441	433	435	331	321	232	175	562	216	390	345	348	224	152	201	301	504	228	282	171	100	416	136	130
[truncated: 894 more columns]

## Sheet: WT,che1
Figures 4H, 4S-1C, 4S-2P
AIA::GCaMP5A F(A.U.)
Stimulus:	AWA::Chrimson
Genotype:	WT
N:	1	2	3	4	5	6	7	8	9	10	11	12	13	14	15	16	17	18	19	20	21	22	23	24	25	26	27	28	29	30	31	32	33	34	35	36	37	38	39	40	41	42	43	44	45	46	47	48
Frame (Pulse at 100)
1	365	227	326	308	391	369	62	432	217	253	448	386	119	131	348	462	331	535	351	308	307	257	297	256	418	109	297	361	438	360	45	254	239	299	452	251	475	254	326	447	338	523	316	291	460	204	176	226
2	393	86	409	168	471	418	72	425	219	421	530	360	248	60	278	550	387	640	325	415	377	298	266	297	409	174	436	385	381	462	62	368	263	455	483	270	500	215	442	489	232	563	264	253	438	241	229	179
3	515	230	288	345	361	187	107	486	284	305	447	406	221	106	402	450	274	575	371	425	318	222	380	140	330	239	371	482	402	388	35	181	271	352	408	382	455	160	336	524	357	497	408	297	351	227	263	184
4	440	206	326	390	316	162	166	464	152	195	424	226	287	213	356	522	312	559	329	321	387	356	288	116	319	191	299	360	472	433	96	182	198	394	465	283	427	124	343	492	356	582	243	252	420	171	323	128
5	387	176	297	691	369	260	56	338	276	383	472	326	109	222	358	520	266	654	314	357	462	303	276	179	381	234	316	441	365	484	107	326	282	505	500	310	440	191	392	566	334	607	319	318	377	225	234	250
6	456	268	188	403	413	188	134	377	269	275	433	319	238	82	321	488	276	641	356	433	362	247	323	160	488	173	164	380	483	384	-16	289	182	453	486	275	490	261	335	565	320	534	272	274	358	187	318	175
7	293	231	403	608	378	361	37	335	298	276	504	349	123	209	265	380	354	564	306	315	319	222	276	181	416	284	243	464	465	464	48	275	249	271	441	368	460	235	429	518	283	556	314	339	330	220	191	194
8	476	145	309	489	359	95	66	450	182	339	469	321	346	170	375	523	315	702	301	354	368	258	288	281	274	234	240	453	465	295	95	268	274	364	488	302	351	217	363	601	398	646	323	329	489	197	212	214
9	428	134	341	570	340	216	74	357	260	290	491	354	109	236	326	535	368	622	304	308	462	314	247	49	500	143	302	419	399	426	162	306	234	340	549	379	314	190	399	474	358	502	402	258	373	280	322	311
10	417	229	300	668	286	341	79	389	167	358	491	311	181	186	380	579	290	609	325	335	378	188	334	300	467	215	308	423	407	470	81	207	296	396	407	293	419	226	386	486	387	478	349	263	423	226	268	86
11	346	275	303	505	476	432	21	491	205	415	686	297	375	151	373	466	316	620	208	292	426	233	284	123	372	169	415	310	494	417	114	215	219	341	464	422	366	219	404	550	385	519	230	198	411	222	214	203
12	352	142	216	419	377	301	32	270	247	280	472	343	291	187	421	475	299	441	365	339	369	283	264	170	346	216	404	417	397	466	58	226	197	367	641	413	350	235	404	576	308	585	306	301	383	197	295	230
13	414	230	359	230	363	412	78	272	215	398	442	410	228	159	361	436	358	651	321	187	375	304	339	177	391	190	338	384	481	402	60	262	202	362	612	367	484	200	477	513	303	524	255	241	287	283	209	234
14	397	161	336	533	394	309	71	281	227	319	359	475	416	158	326	342	307	598	269	281	394	220	367	200	404	167	374	498	459	395	72	258	166	313	584	298	480	299	401	486	367	458	360	211	446	294	185	224
15	410	197	219	266	266	193	107	289	241	243	493	471	518	240	330	385	308	553	399	310	316	201	318	174	351	114	345	332	400	392	66	222	222	413	509	379	352	261	397	455	342	610	251	327	379	170	363	206
16	459	230	348	255	254	302	53	410	217	267	381	458	373	161	364	411	400	538	325	291	400	334	316	130	447	162	306	261	402	485	107	205	263	244	587	288	411	200	336	567	320	633	273	286	438	264	349	219
17	467	257	242	232	311	292	97	385	320	334	443	419	463	150	275	570	301	533	307	476	327	235	245	167	429	220	272	434	372	451	99	161	171	273	468	331	401	286	344	446	341	548	279	244	451	310	242	146
18	442	193	217	504	362	285	56	358	253	273	508	350	450	130	356	408	353	586	294	301	413	230	300	179	460	166	314	283	399	390	30	188	284	346	418	289	408	190	264	375	377	609	380	316	422	130	343	205
19	448	158	318	140	435	192	141	417	208	363	395	305	391	149	267	427	326	635	325	339	462	330	350	186	349	216	292	436	398	431	117	218	286	365	591	378	478	168	333	523	316	669	321	211	500	258	278	164
20	424	213	264	403	414	252	143	424	288	371	470	439	522	117	286	464	397	557	300	290	358	325	377	187	412	219	312	329	364	406	164	283	262	429	458	343	368	179	340	501	446	575	343	305	410	184	308	279
21	501	163	230	295	445	72	63	450	195	316	412	298	417	72	358	475	341	602	275	330	371	286	295	143	404	175	337	437	412	392	123	221	193	338	518	338	455	252	447	460	321	553	239	289	396	281	283	189
22	503	252	288	194	372	375	58	483	307	367	407	292	519	180	358	556	305	637	377	284	406	191	279	124	433	121	295	349	365	304	196	182	207	335	400	291	383	232	384	481	387	598	355	248	423	313	227	164
23	451	103	275	119	302	320	92	305	166	332	382	338	348	167	380	517	382	755	448	290	287	260	349	256	426	167	273	388	323	433	61	257	230	346	485	325	402	209	483	600	271	553	375	201	411	252	190	180
24	416	235	335	229	299	343	39	375	323	320	496	418	584	100	402	466	356	621	333	323	370	268	305	114	380	179	338	403	351	351	78	277	240	329	446	272	378	206	426	518	353	480	334	368	372	281	253	109
25	353	150	257	127	378	292	134	433	223	339	452	358	387	-5	391	528	401	576	323	345	379	266	254	231	384	222	328	424	435	472	104	150	170	339	526	326	427	256	412	503	308	455	355	364	327	300	212	157
26	414	241	327	274	344	323	150	357	234	338	509	300	457	231	288	335	357	540	372	330	422	213	280	239	353	159	323	341	347	440	61	153	220	447	389	353	435	220	404	498	304	586	280	325	331	277	354	165
27	495	215	198	438	362	271	44	302	228	412	379	252	512	135	388	422	348	576	341	263	376	370	280	281	449	175	374	350	392	427	118	186	231	344	432	318	484	206	279	440	334	493	325	277	458	186	288	90
28	430	222	257	224	243	203	92	248	289	292	603	379	567	106	454	491	332	559	236	253	359	215	242	303	380	203	281	283	380	358	78	221	288	312	531	336	448	101	296	521	322	468	329	374	405	181	301	279
29	397	259	374	207	411	238	125	355	214	431	573	343	385	70	376	477	318	526	372	340	424	291	323	215	392	314	338	365	334	492	59	227	254	413	438	280	427	275	341	459	446	557	303	359	406	319	294	196
30	353	236	206	151	282	259	37	274	206	217	405	421	454	193	413	442	382	562	328	303	317	137	249	237	407	237	336	376	396	529	107	231	194	367	437	402	423	178	382	507	365	567	263	210	515	376	255	312
31	460	231	253	144	361	371	64	365	221	292	522	354	378	206	350	437	304	528	325	331	387	228	348	149	479	177	294	478	348	321	32	185	348	370	547	387	363	130	404	527	384	532	377	230	234	321	263	233
32	463	198	284	245	355	179	87	275	279	348	446	319	460	196	308	370	350	700	347	374	388	242	234	195	424	209	221	424	380	464	92	211	217	364	422	248	406	237	454	432	317	471	329	339	394	179	302	104
33	440	203	271	484	342	350	21	307	288	274	455	521	421	150	408	463	289	595	331	243	508	287	305	179	470	226	281	360	399	498	68	225	223	381	396	270	461	182	411	395	358	621	342	334	385	338	331	224
34	413	257	294	288	347	251	219	253	139	383	402	392	585	107	345	374	401	603	257	408	418	208	298	153	415	212	353	411	409	376	70	182	246	261	492	303	419	210	413	417	360	601	269	297	511	364	263	227
35	325	287	231	614	424	243	111	402	148	275	487	373	404	149	343	509	480	611	299	284	391	153	348	174	404	258	240	467	384	437	146	214	261	371	411	311	347	276	415	489	364	590	290	265	448	254	239	162
36	425	195	295	416	234	181	51	261	230	301	499	353	410	188	321	499	308	555	270	297	454	248	251	215	375	185	360	418	347	283	47	245	172	401	415	414	349	143	367	474	384	522	341	279	435	254	215	133
37	398	125	272	308	358	246	69	342	300	411	436	353	489	222	361	455	342	543	276	348	373	268	173	229	408	178	255	352	501	428	111	190	314	342	442	255	444	170	386	553	424	538	256	340	385	214	287	209
38	457	241	253	503	329	314	19	263	279	356	514	389	402	141	339	440	463	665	295	325	424	252	247	218	418	232	287	459	461	388	57	225	219	460	528	306	244	173	432	528	291	473	262	279	351	366	180	137
39	462	173	259	410	391	154	109	284	277	355	490	338	464	179	396	438	367	613	328	263	387	314	302	227	368	192	293	462	429	428	87	202	211	457	476	282	328	178	423	542	298	542	360	246	393	365	259	183
40	483	214	359	433	399	227	91	289	275	343	444	276	478	142	407	540	353	539	275	315	412	178	278	141	330	201	340	437	393	430	121	147	256	333	435	326	460	178	411	453	315	495	265	312	393	266	213	253
41	372	216	278	446	380	283	84	231	263	312	474	446	443	176	359	401	355	601	321	331	476	181	280	179	383	226	326	443	453	362	66	181	198	414	497	263	333	178	418	414	221	464	264	340	360	244	339	196
42	439	180	331	448	371	221	188	343	349	301	521	391	527	160	330	430	240	565	353	293	262	284	326	197	431	161	296	428	410	458	147	209	163	410	391	322	470	295	342	422	478	544	416	292	344	185	312	209
43	384	227	268	412	299	194	38	317	276	321	532	369	467	90	368	459	285	532	347	326	286	234	367	195	383	215	376	391	334	430	161	208	227	431	463	352	466	161	383	526	248	513	356	243	385	287	362	174
44	434	172	309	327	312	240	42	295	279	287	444	402	467	126	396	513	281	493	409	508	344	275	271	206	433	203	366	437	351	494	45	291	249	421	574	295	437	192	363	506	190	595	379	311	328	219	276	299
45	442	204	310	267	424	289	123	300	210	351	558	289	477	140	380	576	376	618	381	328	433	248	247	197	447	109	360	356	391	488	69	280	278	344	388	299	414	178	335	523	340	602	375	320	358	304	309	216
46	439	234	268	292	326	271	46	286	204	315	502	299	483	102	271	412	415	577	235	299	361	206	340	165	428	233	260	436	343	395	71	180	159	533	553	302	473	134	339	457	331	624	246	277	485	225	247	184
47	342	158	311	419	455	326	3	425	270	289	386	347	510	193	402	386	346	578	346	287	400	345	229	236	469	275	364	394	293	439	35	251	209	435	324	367	378	189	301	498	378	605	331	298	461	223	210	258
48	452	180	303	422	378	181	113	436	189	279	510	480	406	168	412	370	253	596	372	262	376	271	269	202	275	253	347	451	360	367	108	266	267	499	439	440	379	254	427	545	353	586	315	248	411	207	283	161
49	500	216	302	409	394	190	111	384	200	314	416	360	657	150	437	438	386	550	371	332	341	220	289	153	446	108	347	460	418	439	36	165	216	507	513	343	521	237	368	426	194	542	354	271	334	168	309	174
50	456	195	211	365	244	240	39	364	200	344	598	451	505	115	381	470	349	579	351	159	371	233	226	177	418	232	445	489	390	350	87	197	279	431	442	201	413	225	373	375	345	548	306	301	407	338	252	206
51	440	188	355	429	321	205	101	426	221	332	493	450	526	219	341	410	431	612	343	277	345	193	333	225	409	182	298	475	339	355	77	217	171	296	469	291	474	195	394	398	330	546	312	326	482	365	188	196
52	409	185	327	455	436	313	109	305	150	380	397	396	302	213	355	472	361	617	379	299	450	230	311	282	359	193	292	476	435	291	28	180	226	477	475	269	408	248	336	487	393	522	290	367	345	201	250	252
53	420	260	174	304	321	206	86	275	206	354	527	282	499	133	388	473	305	563	330	306	446	266	292	269	402	301	297	359	397	471	0	295	253	402	508	262	462	238	387	392	277	466	329	363	400	303	225	259
54	490	256	258	304	369	300	108	288	187	411	431	481	550	142	455	387	384	607	359	241	326	195	323	177	485	255	302	407	326	376	24	242	271	429	503	378	495	169	386	484	399	537	290	307	479	356	327	267
55	422	264	245	317	412	212	45	371	236	365	544	356	468	190	474	464	348	513	335	331	367	261	389	128	433	189	264	499	408	371	26	325	272	439	570	381	357	157	291	366	313	605	379	386	401	294	361	135
56	530	225	240	345	396	210	59	426	279	290	517	289	441	55	405	459	262	501	372	276	357	208	309	115	457	172	363	546	432	487	87	298	240	466	402	359	383	221	418	449	242	512	381	408	542	251	280	134
57	474	187	206	305	437	237	62	566	149	308	593	421	538	145	375	376	290	733	371	347	407	218	425	283	358	205	342	371	368	393	49	211	238	507	516	240	463	174	374	488	250	480	288	371	360	355	237	113
58	374	131	294	330	429	162	31	364	293	348	476	322	488	53	293	526	265	686	285	446	472	262	243	263	419	156	321	498	375	382	46	297	211	424	558	328	390	288	390	448	368	666	306	357	423	230	393	196
59	365	208	275	381	351	195	20	380	216	308	441	331	481	120	341	441	274	595	319	275	281	339	235	226	468	226	348	441	445	415	36	236	181	262	515	256	390	250	329	512	330	667	369	315	393	247	125	271
60	417	232	261	277	340	228	52	352	208	259	476	304	447	187	351	582	338	605	309	331	382	324	288	187	434	306	228	421	424	488	101	271	293	454	536	317	484	203	426	529	300	563	222	331	394	293	192	149
61	450	209	203	435	430	212	40	353	205	450	399	321	411	229	265	442	255	600	318	351	366	246	326	152	408	171	392	451	305	352	11	216	265	344	400	323	498	178	375	459	399	510	274	395	368	234	209	244
62	410	190	228	436	309	181	142	412	226	287	514	352	460	165	286	508	308	598	264	301	317	303	341	200	432	221	319	475	376	454	113	190	279	525	410	324	407	163	394	435	390	551	306	285	422	243	254	191
63	321	163	295	449	279	207	84	213	239	334	447	352	294	99	324	410	331	778	313	325	360	250	211	161	375	196	441	413	465	449	90	252	197	422	414	381	337	274	381	433	331	518	267	345	409	223	211	265
64	374	257	281	513	299	216	120	271	193	378	532	381	420	185	423	519	417	577	272	379	260	259	187	180	479	240	286	409	421	405	51	342	318	454	362	366	384	245	415	488	251	642	319	369	460	166	412	193
65	393	164	238	419	275	297	110	393	270	350	508	300	423	239	325	406	309	554	273	394	365	209	222	253	380	270	415	459	472	427	23	218	240	324	394	294	321	236	349	516	329	615	314	360	385	264	236	242
66	447	208	270	543	401	294	84	244	188	382	538	375	396	184	454	421	363	589	340	242	326	384	328	319	404	161	294	404	366	359	54	219	237	324	363	411	441	191	378	412	339	571	337	316	348	222	360	301
67	396	200	276	466	343	198	82	290	336	305	467	320	480	191	296	601	348	604	212	303	401	291	303	234	429	157	337	337	490	335	111	218	234	402	537	427	361	201	341	455	338	570	253	384	403	305	272	285
68	511	277	227	613	327	247	56	342	220	334	431	311	450	129	415	420	298	561	301	294	349	284	296	159	443	219	282	413	407	424	52	240	234	379	389	313	390	202	440	486	490	591	302	343	479	141	218	111
69	441	137	274	516	354	208	131	330	267	335	589	391	323	164	375	568	390	604	244	278	268	209	369	206	487	180	329	392	370	410	108	244	371	450	498	391	410	206	324	475	306	491	397	304	396	315	342	261
70	441	243	320	476	417	295	171	348	265	394	631	397	384	78	450	462	312	502	283	354	503	263	301	201	364	161	346	504	408	463	126	260	213	447	519	379	498	232	313	492	394	637	292	299	295	250	248	192
71	404	214	272	484	337	168	140	289	300	416	510	459	369	180	347	469	347	559	364	328	495	227	216	136	437	214	412	414	415	416	65	271	255	333	457	368	392	242	401	431	326	616	365	242	333	237	225	180
72	412	205	219	399	371	180	105	535	256	294	559	368	392	98	372	463	284	566	403	315	301	237	198	195	377	192	294	517	399	512	145	301	218	472	427	286	402	200	518	520	358	544	346	229	451	289	222	168
73	415	227	293	441	385	153	42	270	232	379	507	390	423	152	432	384	367	445	335	353	376	299	299	204	448	220	334	417	463	355	139	275	164	328	441	255	484	140	305	392	329	593	351	235	412	241	240	151
74	407	146	284	399	301	237	221	355	179	302	458	403	368	80	367	481	431	604	278	354	291	289	281	140	378	154	443	412	413	414	38	243	173	473	412	434	440	268	398	564	325	563	405	216	319	236	221	197
75	423	254	198	541	387	195	60	423	210	355	364	308	300	208	397	490	361	585	351	361	346	262	333	267	355	215	383	343	303	446	16	242	162	396	444	333	408	252	355	374	253	421	323	317	411	267	258	243
76	462	283	256	485	343	265	103	331	246	390	427	359	405	125	353	410	321	572	356	336	447	221	213	267	377	194	320	403	470	471	94	297	191	368	396	313	332	268	449	439	422	594	262	342	443	222	272	161
77	427	180	315	586	222	308	55	345	201	292	429	380	381	127	344	532	389	509	361	268	359	250	222	138	361	166	383	382	413	403	37	185	206	383	447	311	423	131	314	442	385	530	352	441	375	212	157	217
78	358	240	200	998	424	189	31	430	188	367	495	373	382	166	334	588	355	709	391	209	300	286	314	216	427	234	448	404	425	484	95	265	256	365	398	373	277	167	389	492	316	489	319	276	369	194	208	118
79	388	279	240	890	321	346	32	382	223	433	585	330	351	143	362	404	356	589	300	229	427	192	186	189	406	229	230	452	465	502	56	254	312	415	629	330	532	155	322	400	329	464	364	292	393	277	403	166
80	379	215	276	962	333	292	30	360	178	311	413	293	398	165	400	486	211	608	317	299	399	314	252	255	387	200	271	361	432	457	92	280	190	440	496	343	371	188	376	456	277	554	248	248	365	367	344	175
81	330	247	180	901	435	185	45	432	209	329	396	288	350	132	439	436	342	544	372	268	339	267	245	250	581	152	405	448	330	414	96	278	212	378	496	257	478	149	400	428	309	588	201	292	491	206	289	174
82	309	230	263	810	313	205	61	238	194	409	517	448	381	113	404	535	441	598	220	258	413	210	302	219	331	264	343	411	418	386	90	344	239	474	486	271	432	250	343	483	328	598	394	342	397	272	178	242
83	331	254	264	827	385	242	69	424	230	310	451	324	347	205	331	472	398	578	351	309	338	218	306	149	435	185	360	423	395	483	44	272	271	339	452	363	435	202	287	590	362	491	257	322	460	348	327	159
84	372	142	241	894	372	320	65	402	270	496	501	230	283	146	385	406	282	675	380	277	406	303	304	159	468	218	364	601	307	337	109	353	176	331	443	298	441	236	322	425	399	544	286	386	395	294	197	175
85	351	197	264	846	403	481	105	327	226	451	544	357	408	108	342	441	372	536	293	340	299	336	393	225	401	147	352	457	471	443	129	243	260	341	471	323	391	200	299	434	342	534	333	241	280	277	364	172
86	375	168	266	732	395	480	63	302	232	465	315	320	315	126	297	419	350	582	471	307	434	229	342	296	463	225	411	441	447	534	139	217	245	454	446	320	476	204	402	474	462	617	257	238	354	284	261	128
87	421	140	184	683	313	488	11	402	237	546	350	348	395	143	186	484	300	675	291	281	415	147	269	166	526	235	366	372	372	385	119	337	234	351	459	333	392	173	416	516	327	594	326	328	439	186	316	229
88	373	157	293	787	352	501	65	418	292	405	407	447	227	105	305	580	371	666	347	339	340	241	261	221	417	150	329	441	349	392	60	341	195	370	428	313	442	101	395	413	211	667	301	287	462	311	218	155
89	331	156	161	830	365	433	54	329	296	443	403	371	416	182	346	456	362	832	368	278	524	283	282	232	350	191	237	351	328	445	93	200	213	439	539	435	446	240	339	313	411	569	342	304	375	275	214	210
90	323	174	182	846	284	395	105	361	266	484	515	292	383	201	359	505	378	838	303	311	373	257	393	171	388	182	300	409	297	427	18	286	274	444	462	369	402	194	211	458	319	543	253	320	459	232	206	195
91	349	250	168	768	326	483	87	375	184	447	508	301	414	197	355	532	338	1142	302	287	324	247	347	162	446	266	363	343	478	341	64	178	330	426	499	295	438	250	268	474	401	583	273	178	474	182	212	172
92	327	200	213	634	330	549	149	298	181	402	369	468	302	154	340	383	471	1150	389	312	289	288	285	113	397	178	374	557	381	422	59	326	266	337	400	315	424	203	340	515	238	588	355	372	416	240	284	126
93	376	155	291	746	392	500	33	356	69	392	390	402	372	190	592	445	399	1150	351	321	383	277	317	222	555	175	332	341	396	447	78	241	262	397	505	374	382	195	344	425	377	546	291	332	412	191	251	166
94	355	219	274	654	335	357	32	344	135	479	612	326	362	102	407	472	320	1115	388	304	308	307	430	216	461	199	296	394	304	344	38	266	264	407	446	290	411	203	337	427	301	669	323	333	406	169	337	86
95	451	211	210	644	368	447	147	302	224	507	446	207	347	208	330	518	269	1068	317	239	346	292	394	218	405	176	308	454	413	385	65	247	243	413	449	354	471	232	189	611	356	588	343	301	471	209	305	186
96	338	199	268	603	407	459	104	309	188	443	434	276	480	138	372	435	406	1093	386	256	475	322	299	155	417	226	280	490	460	451	127	274	156	414	396	371	495	172	297	458	339	594	307	298	419	243	330	208
97	349	254	284	525	288	553	133	256	191	481	450	389	515	141	459	443	384	1013	428	396	288	283	188	163	423	269	394	346	402	447	108	255	193	373	363	290	396	136	374	400	363	600	368	252	346	200	220	172
98	399	192	275	617	330	551	32	255	259	400	450	369	364	115	345	518	412	1061	384	283	322	227	282	219	455	327	325	390	369	378	90	246	212	452	400	231	332	189	288	457	411	590	402	300	428	280	292	161
99	287	104	127	583	432	477	104	217	268	386	423	320	393	84	307	450	380	1135	296	357	425	315	340	178	460	146	364	482	425	389	132	309	248	365	364	291	475	222	355	504	451	591	337	319	451	222	238	263
100	414	176	205	634	295	555	47	271	196	460	345	306	368	171	331	514	447	957	456	260	396	201	259	160	428	254	349	401	469	473	112	191	313	363	416	324	344	172	304	534	462	608	304	271	402	338	275	252
101	329	229	151	598	387	506	105	260	233	580	501	303	353	73	371	511	577	971	366	284	435	160	410	257	447	221	338	481	358	532	96	233	226	449	429	350	426	286	332	371	295	521	272	301	326	131	221	195
102	359	296	204	508	265	540	39	331	219	338	345	402	365	225	289	453	411	979	438	441	468	250	292	240	393	213	304	427	400	456	187	239	251	311	428	241	363	211	315	426	225	626	332	281	339	131	314	243
103	384	199	239	672	385	516	106	395	205	438	492	377	316	167	302	459	517	999	267	290	345	208	356	195	391	188	401	343	382	389	154	280	173	374	408	209	366	319	261	454	334	526	285	354	408	270	191	168
104	350	141	235	635	366	423	18	370	302	447	558	348	416	288	343	504	460	1055	343	234	439	258	340	243	363	289	266	495	384	478	56	280	356	380	507	360	466	326	293	429	390	481	331	225	311	239	243	136
105	384	176	310	663	410	528	39	216	135	465	559	272	367	147	333	425	460	972	464	234	299	172	190	128	421	154	359	396	443	456	63	258	238	286	429	295	324	113	272	516	329	502	344	278	378	269	250	172
106	408	166	166	608	383	450	82	280	230	394	580	373	359	233	392	523	430	869	404	312	391	200	287	300	316	165	384	412	414	395	181	280	173	319	512	324	415	227	355	447	375	465	267	332	435	332	131	237
107	422	244	277	617	389	564	85	484	249	473	641	385	221	346	429	482	472	858	417	269	466	226	297	206	402	265	270	468	458	422	31	223	249	367	580	224	413	179	386	338	411	594	307	307	387	228	258	97
108	391	206	336	633	305	419	35	359	200	471	682	402	380	226	417	490	485	996	312	372	573	291	281	244	397	182	290	376	517	393	113	260	229	345	528	298	357	218	326	423	318	555	349	328	379	316	290	145
109	520	239	259	625	336	501	72	415	173	460	653	376	452	217	399	531	526	868	473	343	640	170	260	203	385	235	279	394	406	364	33	315	260	389	541	302	404	119	403	385	472	509	341	289	388	404	306	128
110	675	149	310	811	306	427	7	438	228	426	684	395	435	281	393	513	479	1007	414	404	653	217	234	122	425	208	215	543	364	305	66	269	213	381	654	353	392	220	333	454	378	540	231	374	489	366	298	226
111	716	179	310	860	325	510	75	382	221	521	806	404	407	193	410	477	453	916	353	253	829	264	260	254	329	166	341	648	349	427	84	320	222	346	741	324	499	172	284	402	366	554	312	355	534	381	274	203
112	673	247	265	1046	382	539	16	423	159	450	772	320	539	221	562	435	501	1113	379	324	931	278	261	251	396	193	451	755	430	362	137	256	220	487	614	338	475	118	345	415	418	565	334	296	344	429	249	112
113	653	227	320	990	380	519	85	483	152	461	708	326	451	189	383	383	519	1046	449	313	801	255	234	203	358	166	272	785	428	414	66	329	271	679	690	273	407	109	288	440	489	480	296	310	424	533	206	210
114	782	182	201	1005	352	434	82	373	256	466	630	322	396	222	527	448	459	867	257	326	761	267	392	254	352	184	297	781	392	411	20	279	227	641	559	376	435	195	302	506	476	539	344	261	453	411	210	209
115	641	190	206	1125	387	485	95	346	244	463	572	293	395	312	564	505	440	1001	447	369	777	294	321	234	494	211	375	862	427	394	73	307	255	618	610	307	422	203	344	471	483	522	319	263	356	504	252	155
116	741	211	272	976	369	565	59	458	180	353	733	309	466	291	657	405	481	1009	384	227	940	209	236	252	467	199	399	731	382	352	113	315	247	773	553	306	429	295	380	488	403	440	325	316	386	433	296	123
117	725	226	255	902	419	445	107	412	184	405	668	337	359	292	489	495	375	1002	373	326	910	217	216	248	414	177	412	912	339	467	84	283	240	634	582	308	566	269	366	484	427	521	332	326	388	314	201	126
118	669	190	260	936	287	476	72	492	174	460	800	328	417	425	532	472	425	848	399	262	839	257	420	290	445	198	428	873	289	386	59	191	230	580	547	301	661	343	339	579	360	564	231	271	432	383	217	159
119	719	197	317	877	345	450	72	390	230	481	692	277	434	306	455	503	366	856	363	355	780	306	272	247	406	212	462	781	320	391	104	261	275	585	609	402	555	176	326	418	360	647	432	374	452	416	207	117
120	719	166	283	1039	291	446	153	610	230	385	659	367	505	303	480	528	648	927	350	334	837	255	321	361	363	203	286	765	439	456	68	239	187	500	555	249	618	239	352	502	488	659	296	269	461	403	271	95
121	701	217	397	969	400	429	107	486	216	409	703	346	322	271	501	460	433	731	368	415	859	326	352	170	440	156	345	806	475	417	20	276	204	669	639	340	539	253	400	349	389	826	311	390	443	302	248	194
122	575	310	250	981	404	460	64	471	255	461	683	328	491	347	568	435	501	945	464	330	880	305	280	239	480	249	307	817	366	348	48	397	259	617	500	328	502	163	347	417	242	956	416	294	351	441	386	135
123	651	204	179	827	437	433	59	496	220	419	535	389	490	276	428	525	474	832	387	333	803	97	330	289	465	294	210	774	391	408	94	262	226	526	688	312	654	228	402	492	322	984	400	289	388	382	298	142
124	613	155	333	955	303	387	8	443	177	408	774	380	426	262	527	466	461	942	434	271	725	146	361	265	340	233	277	735	318	390	103	232	243	599	563	256	529	209	336	427	475	982	341	401	518	470	370	188
125	692	296	192	924	300	428	130	457	196	435	705	394	355	338	436	513	532	853	362	433	838	246	395	265	544	185	272	644	384	355	189	278	235	614	533	328	559	173	448	470	533	934	322	387	403	366	245	220
126	508	249	307	1058	312	428	85	531	256	386	522	421	386	290	549	430	562	908	330	328	906	317	362	259	371	244	324	709	424	334	62	310	296	587	599	297	510	203	406	391	470	998	407	282	454	253	342	269
127	578	197	247	870	269	444	152	375	239	531	695	291	463	318	448	434	491	955	350	348	697	265	337	261	390	209	316	689	393	506	97	285	341	433	636	326	427	189	418	530	381	1102	407	373	425	390	157	150
128	559	265	241	957	307	408	90	500	240	490	603	310	421	262	458	470	528	940	470	273	693	278	410	156	452	195	313	656	408	410	154	231	198	510	525	396	495	317	237	599	454	992	377	261	307	366	295	232
129	576	188	288	941	368	577	89	552	247	407	738	403	461	279	546	461	573	885	552	323	611	311	364	189	365	269	355	615	384	362	111	263	250	415	744	376	572	219	333	418	397	857	432	234	258	326	254	204
130	463	243	277	847	385	431	57	496	230	652	712	289	430	213	582	524	461	979	417	305	738	265	266	224	428	304	224	637	360	478	105	349	256	486	638	403	489	172	319	359	390	907	350	285	551	313	332	180
131	578	209	258	819	488	380	50	512	158	403	712	501	345	221	520	428	474	960	335	362	692	208	271	278	574	205	380	670	443	435	146	171	226	413	642	254	533	219	213	378	568	954	410	343	412	363	289	195
132	635	154	311	792	363	475	151	543	194	498	638	463	449	178	486	475	455	838	362	249	686	327	350	125	439	161	316	576	415	434	132	348	309	443	580	306	382	207	364	468	499	827	406	376	534	515	263	90
133	633	226	349	860	334	507	68	428	209	518	685	299	467	218	458	502	535	953	398	283	704	298	306	215	512	213	360	698	453	525	122	293	247	521	479	309	590	159	278	446	572	856	346	250	424	401	365	272
134	595	234	353	904	410	476	46	527	280	383	809	363	347	289	404	551	518	930	297	349	668	262	373	241	383	277	371	588	390	389	66	251	270	507	579	321	502	236	381	491	476	895	438	315	343	364	218	180
135	560	224	418	848	237	464	141	557	213	498	624	307	424	174	540	499	435	866	442	405	684	228	333	287	436	127	424	634	272	559	101	255	272	397	624	288	518	278	398	543	444	743	392	193	477	312	256	237
136	744	217	482	771	312	410	104	500	312	385	745	433	440	288	476	371	431	866	395	314	653	139	340	187	456	162	322	693	518	396	84	279	233	483	635	340	565	194	324	487	505	805	372	199	498	458	261	117
137	775	228	456	629	502	546	64	427	225	444	759	286	411	186	536	406	352	989	390	343	570	268	318	244	398	221	271	791	450	414	78	319	247	447	466	341	434	168	296	505	558	942	365	276	367	371	159	184
138	732	253	488	781	322	454	100	522	183	404	757	320	377	165	456	405	434	1028	301	372	595	236	280	213	370	283	357	864	422	389	139	304	269	395	659	408	505	217	354	447	463	807	460	201	446	393	233	213
139	769	204	495	777	342	551	103	455	269	381	762	268	405	243	384	477	397	1228	406	268	673	358	317	194	451	212	370	861	408	414	78	210	237	465	536	317	523	228	282	459	482	880	386	331	408	344	342	231
140	835	198	489	791	397	434	130	512	223	469	606	395	271	252	429	504	454	1145	403	247	591	251	351	192	365	207	361	931	332	421	131	272	255	461	593	330	459	210	319	458	456	799	329	327	347	411	364	172
141	872	146	425	707	369	449	62	438	305	463	815	252	445	266	399	491	494	988	400	314	623	199	327	227	417	258	205	968	334	430	135	319	218	572	412	281	562	256	292	445	382	731	404	248	378	382	222	168
142	776	266	464	707	422	417	-3	494	230	377	773	367	269	304	444	432	449	1031	402	310	595	159	313	170	352	228	348	1008	365	394	95	230	301	437	512	365	436	168	347	431	494	683	404	321	407	437	206	214
143	691	143	494	583	382	323	125	527	222	466	724	316	415	292	429	561	475	966	398	347	589	206	309	137	514	283	354	956	331	427	138	210	188	502	527	412	568	317	311	481	389	895	422	238	308	503	261	213
144	751	266	487	787	413	486	80	598	249	409	672	261	346	229	341	406	487	1040	345	287	522	250	350	176	396	227	300	944	411	495	117	260	293	457	665	375	390	166	302	477	552	664	377	279	358	468	302	158
145	727	271	447	727	439	506	73	514	242	539	796	283	390	348	434	443	493	813	487	326	573	220	347	248	545	267	295	869	344	454	52	300	320	423	508	334	377	265	279	527	509	700	331	298	322	340	366	65
146	743	186	466	679	426	485	104	310	232	478	680	402	369	336	436	424	506	1065	496	324	552	328	287	172	429	241	445	879	396	466	13	318	307	467	533	257	365	212	413	451	384	701	402	336	422	391	231	216
147	712	222	519	659	441	519	176	591	241	413	673	407	426	340	271	453	428	944	273	308	546	283	311	324	356	249	307	906	270	475	80	291	302	562	598	341	478	186	341	457	461	745	377	283	347	425	265	160
148	799	195	564	565	440	432	155	557	203	364	760	466	420	277	337	498	475	871	478	359	441	285	216	206	397	195	407	938	449	490	89	361	262	553	470	342	453	245	349	522	461	621	387	287	400	483	179	169
149	783	246	496	682	425	419	147	473	201	412	718	287	393	379	379	460	418	894	348	382	507	346	231	184	440	171	323	997	405	422	169	370	290	526	562	340	370	198	296	460	354	551	410	394	293	357	313	182
150	836	285	569	664	378	539	88	486	176	454	594	301	435	308	391	490	517	1048	399	320	413	248	450	257	424	212	371	1056	470	436	130	370	279	501	418	250	448	207	286	524	534	596	391	276	256	379	350	172
151	608	270	530	485	480	539	92	557	237	528	768	262	340	292	345	432	350	1144	414	313	428	263	277	291	437	227	386	778	435	357	134	331	251	542	537	236	393	266	392	566	380	749	397	337	455	467	289	217
152	694	204	682	546	429	572	86	468	213	444	728	293	333	400	449	598	456	1241	318	348	582	283	329	236	305	275	307	848	389	446	82	338	245	388	628	258	419	294	241	350	433	664	321	306	395	362	291	255
153	646	269	624	766	373	453	151	640	185	472	606	460	464	317	360	537	438	1194	435	460	474	265	303	85	334	254	348	825	395	420	83	357	212	532	525	283	398	244	361	474	421	474	437	375	292	292	351	220
154	696	184	492	615	398	439	105	536	246	277	780	414	338	296	403	531	439	1214	276	262	505	258	319	245	438	232	335	878	334	404	59	383	268	556	540	263	606	187	413	413	449	605	416	350	374	329	304	198
155	691	285	545	485	406	596	65	481	164	476	778	353	298	349	395	492	399	1080	289	332	533	245	238	218	459	199	268	887	321	392	145	392	293	507	557	300	427	246	457	497	441	664	446	370	328	340	270	110
156	728	193	588	641	429	509	40	438	198	446	759	300	397	225	388	461	433	1133	419	433	476	242	323	276	457	219	387	814	461	462	126	332	251	490	511	277	477	226	398	515	494	716	327	239	395	382	284	156
157	724	233	550	660	466	491	111	568	254	502	489	345	432	341	395	453	388	1075	448	385	458	192	286	222	421	280	325	879	402	415	161	368	264	402	477	339	429	250	297	478	403	668	380	288	353	320	351	216
158	738	204	574	767	455	552	4	417	227	356	708	262	325	236	267	422	314	1057	488	232	574	240	379	280	397	208	348	840	463	442	132	350	263	396	509	291	385	182	311	484	366	660	282	285	450	310	212	172
159	754	206	554	775	477	625	88	544	194	508	830	421	431	189	379	461	444	1206	411	214	456	193	392	149	435	258	361	722	365	346	142	395	317	355	522	265	410	174	288	524	445	621	342	277	474	368	303	137
160	573	213	637	662	339	491	62	623	216	433	622	373	458	308	306	441	446	1048	493	387	488	310	315	314	374	226	268	822	414	273	127	421	306	337	573	382	458	200	329	570	404	550	384	373	454	396	332	160
161	620	150	540	952	438	509	79	485	170	480	512	391	374	291	278	444	394	1100	494	378	407	254	254	187	486	286	361	939	432	397	117	365	200	454	371	368	452	308	303	527	474	669	392	341	376	341	321	128
162	523	137	553	878	485	573	61	491	186	473	637	413	272	267	355	365	397	1049	362	177	397	239	369	260	465	168	372	833	432	449	181	392	309	350	515	301	526	207	360	444	402	544	372	306	422	171	312	161
163	750	184	449	557	386	484	45	491	260	459	604	374	441	335	413	536	420	975	375	317	513	303	279	187	439	268	299	874	363	389	58	398	322	461	471	237	480	249	355	500	406	546	444	252	442	301	268	198
164	602	333	516	581	410	533	111	529	270	400	698	422	284	205	389	509	439	970	455	342	617	186	299	313	465	239	408	934	416	414	110	352	203	404	529	282	375	240	359	431	448	688	318	213	393	375	321	229
165	696	133	617	652	411	490	46	538	227	506	716	350	366	282	358	484	465	1006	376	342	617	218	350	232	393	210	356	838	437	448	58	393	260	417	430	339	422	240	317	516	498	567	381	359	409	303	384	248
166	573	199	599	607	411	521	7	518	203	455	786	275	316	274	375	519	392	982	391	333	425	233	343	160	487	216	308	886	301	414	157	345	187	378	468	323	355	211	288	474	349	644	446	276	423	319	332	96
167	579	208	574	684	319	521	88	535	168	534	661	347	479	324	375	427	452	929	380	346	405	326	290	229	387	262	327	839	332	467	87	433	203	361	580	352	436	251	294	478	352	619	387	237	444	318	239	237
168	565	285	555	678	427	544	147	584	296	416	634	295	455	201	342	561	495	974	369	309	570	243	306	277	486	260	364	836	489	397	60	441	279	484	586	302	389	231	258	547	387	606	279	271	415	335	212	156
169	600	259	456	651	436	541	58	512	196	520	687	317	539	321	305	458	342	1033	452	341	544	300	285	246	531	224	322	879	405	527	90	426	283	326	468	403	419	197	346	502	364	548	382	224	400	322	309	164
170	445	209	595	638	346	570	69	474	191	426	657	322	417	283	335	539	427	875	436	330	638	355	219	238	410	300	380	962	411	402	121	361	254	350	532	244	378	188	303	560	418	651	414	327	405	426	253	232
171	545	285	579	461	364	516	48	550	136	432	792	395	422	279	417	391	345	979	423	386	570	200	345	190	463	295	378	838	474	329	10	384	350	375	514	223	449	228	372	443	334	518	342	283	454	445	254	172
172	568	243	635	639	334	492	84	606	193	488	781	290	279	279	296	467	466	914	498	363	498	184	368	262	460	204	334	834	452	427	82	319	335	483	464	316	370	211	334	398	332	654	314	283	434	396	271	108
173	508	95	474	531	431	486	119	515	159	375	841	435	365	188	332	502	491	909	408	348	344	307	281	162	341	212	300	746	435	373	140	377	231	289	613	333	358	158	315	491	425	480	343	342	411	407	189	234
174	461	271	527	582	470	540	113	435	201	461	1222	435	271	285	372	445	463	869	438	357	503	257	390	229	456	232	340	782	459	352	157	342	268	259	547	326	324	137	255	439	351	602	358	324	371	349	262	256
175	618	310	531	590	388	509	57	525	241	474	622	345	324	299	301	438	410	939	457	446	574	243	292	157	404	310	274	840	406	414	140	406	284	371	411	313	382	295	328	516	468	576	327	299	378	353	288	308
176	510	226	561	539	501	487	88	465	204	455	671	336	413	264	298	444	495	787	315	336	456	258	322	207	409	235	455	605	302	398	-18	447	299	350	445	476	519	252	472	434	391	574	298	265	426	288	313	116
177	450	187	618	540	437	544	71	452	281	484	815	304	410	296	345	421	462	878	404	392	378	307	341	236	366	218	362	748	355	455	56	316	320	343	461	264	464	215	283	502	417	508	434	320	488	322	278	168
178	530	153	562	498	433	450	69	438	241	443	700	449	396	206	336	502	423	844	398	403	369	272	337	291	345	256	368	618	437	345	55	368	249	317	519	178	417	232	296	447	340	561	271	375	442	284	353	256
179	551	136	662	587	484	508	153	584	188	418	793	371	511	234	325	525	395	852	433	381	432	349	283	209	363	238	278	592	427	480	136	434	332	261	541	365	426	200	342	532	444	601	389	287	373	268	154	211
180	431	179	529	433	390	590	81	527	169	481	730	359	417	118	327	533	459	759	449	306	446	254	273	264	368	202	394	736	386	432	162	453	323	354	413	202	440	224	456	431	417	517	422	302	390	284	270	75
181	483	79	598	464	394	670	48	637	250	405	659	288	427	255	414	479	316	603	425	426	561	245	439	215	345	243	303	667	348	486	110	503	432	256	626	253	409	178	388	485	405	590	395	320	535	376	422	249
182	490	190	605	414	436	521	135	465	257	412	661	295	517	205	382	411	427	813	385	306	507	227	325	133	511	278	347	578	423	430	134	392	305	315	397	409	505	203	367	556	415	682	328	292	382	231	306	125
183	483	202	624	434	410	682	-15	519	329	380	718	228	387	254	304	581	463	789	412	392	535	205	266	110	400	212	321	546	356	504	2	427	292	320	584	339	458	143	351	517	465	606	311	268	415	342	245	191
184	513	238	675	398	357	578	126	515	247	428	755	344	486	214	297	504	334	840	324	365	587	208	326	294	398	184	251	550	398	450	135	344	325	365	592	268	445	261	350	473	367	586	333	293	442	407	254	153
185	571	272	644	491	317	700	77	495	252	378	690	396	369	167	327	455	460	710	302	296	564	226	310	261	487	186	356	566	372	366	105	362	188	327	669	373	566	229	456	440	374	507	401	429	426	183	230	218
186	518	262	635	540	398	575	75	481	163	430	684	326	363	168	257	564	435	789	432	435	359	175	281	234	529	142	258	608	374	476	34	430	296	235	693	331	677	177	387	429	368	618	444	378	371	312	288	267
187	499	224	626	481	354	640	86	554	107	527	532	395	407	306	309	589	497	614	358	387	474	227	358	216	371	215	365	543	385	541	123	422	304	346	515	325	492	267	336	431	360	580	317	297	452	256	250	203
188	590	212	545	503	423	659	28	569	242	465	662	413	476	229	325	414	488	728	404	319	429	266	306	184	333	164	327	485	392	306	170	378	199	239	464	301	495	218	438	487	400	567	302	347	491	284	476	177
189	476	243	622	460	384	673	133	519	275	393	714	264	420	216	332	533	452	660	423	335	436	315	284	245	381	212	375	582	358	396	132	430	282	247	478	289	538	165	348	405	402	655	337	304	414	209	257	153
190	694	201	528	480	434	599	71	592	199	487	730	314	396	196	360	621	537	758	449	307	417	315	260	233	462	230	324	546	490	413	94	341	274	294	685	389	495	99	308	501	406	492	327	259	360	259	355	232
191	594	206	588	455	494	636	62	630	237	403	678	327	420	143	326	410	541	801	385	268	333	229	288	206	320	187	300	627	426	415	51	364	305	261	579	351	504	170	244	438	331	553	415	325	467	361	315	167
192	629	264	537	522	438	721	18	628	211	445	670	361	419	226	393	371	486	671	360	342	467	278	320	239	388	244	366	530	394	399	157	326	258	292	514	417	612	171	302	426	206	596	418	316	409	351	340	219
193	556	232	590	434	357	598	56	654	217	554	643	337	335	235	193	472	409	675	381	350	374	294	253	178	327	209	319	629	399	411	125	375	193	356	719	309	562	201	469	501	334	529	413	307	429	210	335	127
194	654	202	499	385	492	690	42	616	132	459	592	250	461	262	381	542	405	853	349	254	316	178	285	231	399	281	331	413	372	426	-43	352	248	242	564	337	638	183	248	420	405	629	384	222	467	175	322	216
195	654	202	664	431	359	783	29	739	190	484	606	333	441	153	326	432	516	938	378	391	470	257	277	200	497	172	303	571	412	405	42	490	274	276	704	339	618	176	376	543	328	452	314	239	388	215	309	194
196	547	292	627	482	379	646	131	775	246	434	773	376	380	116	326	602	484	793	416	272	418	181	329	166	441	203	393	512	378	361	66	330	277	197	590	378	574	223	453	555	396	565	196	254	487	234	253	234
197	647	171	589	281	355	715	25	554	273	583	670	334	510	107	313	469	421	729	405	301	490	232	318	167	407	254	363	464	436	446	-11	348	246	181	614	355	652	172	514	569	369	603	447	309	405	218	189	136
198	549	100	470	499	441	576	58	636	286	427	710	277	399	153	343	449	433	834	314	346	548	218	298	253	404	243	330	456	374	472	50	300	348	211	566	321	545	247	384	507	276	539	253	214	486	183	196	255
199	477	220	462	382	507	606	54	693	209	431	694	257	509	248	299	383	522	820	444	401	506	321	248	224	391	223	303	549	398	420	113	319	271	266	535	343	535	245	465	582	322	527	346	382	333	211	219	135
200	560	209	556	389	407	631	102	661	190	487	743	345	483	246	325	444	488	832	343	397	454	309	388	134	399	297	322	458	376	435	76	306	230	325	703	425	473	209	392	463	387	557	391	307	518	357	318	219
201	592	214	482	437	411	573	45	743	151	431	582	344	279	154	422	512	326	784	347	359	433	241	318	214	466	171	224	429	372	408	109	303	222	210	785	329	517	225	467	435	393	485	367	272	406	263	207	292
202	457	264	489	466	429	630	14	643	257	369	705	368	275	209	443	361	586	717	394	373	418	245	335	120	493	143	332	442	477	429	87	320	346	184	558	278	623	259	432	494	323	498	358	295	474	193	251	214
203	516	165	448	403	358	614	41	529	212	393	534	302	468	226	423	452	475	734	407	272	448	266	340	136	429	187	308	415	407	338	41	339	303	259	514	349	451	118	419	511	391	491	314	390	462	306	232	214
204	513	159	474	551	409	565	17	599	202	454	621	431	512	242	376	514	424	731	219	393	414	303	349	180	400	262	330	516	377	404	84	353	214	243	599	265	521	302	340	491	386	531	338	227	425	162	290	183
205	505	149	513	396	422	594	76	566	270	412	604	369	364	207	249	486	400	790	332	374	392	311	392	190	464	252	376	465	411	425	158	339	267	211	659	289	503	182	412	449	272	565	238	277	473	266	238	83
206	490	277	480	370	377	554	89	550	289	393	645	348	542	200	319	468	421	804	267	342	406	237	325	264	465	245	334	486	402	419	-4	287	217	195	471	322	541	127	400	455	317	492	280	332	531	192	374	255
207	486	233	490	461	454	519	60	685	259	367	641	283	450	213	338	517	465	718	355	472	365	247	312	155	443	157	396	463	437	470	86	296	223	186	558	328	465	252	384	528	353	611	377	253	445	169	243	194
208	503	174	565	372	375	540	122	619	228	368	611	423	430	217	388	443	485	615	342	454	460	225	391	289	312	260	320	491	308	415	141	303	340	143	437	268	446	211	407	508	363	545	418	373	455	314	211	222
209	498	204	522	410	347	467	104	586	247	352	620	334	452	215	250	532	416	740	252	374	445	259	282	72	411	244	345	462	408	379	98	309	228	251	558	313	433	210	321	519	338	567	269	317	422	217	297	167
210	404	197	409	360	325	542	123	513	298	288	552	336	352	183	457	523	391	699	349	415	428	264	331	113	387	121	274	412	441	464	101	324	297	289	517	288	517	279	341	431	352	425	220	248	369	272	376	131
211	463	161	479	549	317	523	124	573	220	335	617	277	426	200	355	532	435	701	307	338	350	257	233	204	539	173	223	333	391	439	103	303	202	153	465	196	369	149	340	563	308	443	329	205	566	269	312	286
212	478	218	456	463	458	487	102	652	181	303	627	375	448	105	334	424	338	686	402	359	385	256	346	164	375	236	359	523	362	498	172	318	197	278	580	243	661	260	468	496	274	641	346	349	483	305	318	139
213	436	143	361	469	474	526	65	559	240	344	417	426	397	299	384	563	395	681	326	370	387	319	346	229	445	164	316	417	248	446	114	287	210	176	518	419	532	136	284	481	407	621	276	376	379	188	246	179
214	423	256	419	346	379	540	-20	619	230	259	490	357	364	250	382	601	432	680	366	495	396	214	349	244	474	165	381	449	361	396	87	240	176	112	480	244	471	229	394	472	227	559	321	288	413	341	287	213
215	546	207	345	436	286	511	80	601	232	273	390	344	536	153	319	500	400	711	333	439	352	317	365	219	478	212	405	523	378	394	80	332	158	168	531	360	492	186	346	467	482	508	328	211	433	257	293	194
216	469	197	518	395	382	541	64	818	218	409	452	263	415	180	223	524	317	525	359	336	363	193	371	210	420	188	389	440	307	389	61	245	251	208	450	279	427	197	287	435	253	446	313	338	369	216	415	195
217	588	164	440	424	377	557	26	547	277	383	474	348	437	171	427	542	488	639	299	441	413	238	235	192	436	156	337	404	464	437	150	379	346	151	495	190	430	218	271	542	263	357	313	278	421	240	313	158
218	341	162	493	406	368	524	64	644	194	357	396	348	472	205	421	475	459	615	247	344	405	190	298	214	428	224	357	307	420	386	156	302	199	199	581	344	591	261	379	536	331	465	316	349	441	221	353	201
219	419	275	505	481	439	512	105	643	196	411	422	316	533	217	313	514	399	672	346	290	489	295	380	113	447	156	266	362	503	438	103	300	254	169	456	220	465	132	351	449	424	552	307	369	378	208	276	285
220	498	216	442	435	351	634	69	581	284	329	518	308	405	180	379	548	376	679	229	338	371	282	221	313	397	310	347	524	431	487	44	297	237	117	520	396	524	226	426	452	421	591	381	369	358	196	327	289
221	471	236	460	460	365	460	41	607	169	365	492	268	471	71	345	436	474	541	300	354	330	176	286	134	420	194	269	475	474	479	95	321	235	208	539	298	487	258	302	410	354	505	301	286	346	162	288	203
222	531	223	351	459	404	471	80	696	204	413	361	285	370	178	398	493	404	640	314	362	425	261	315	172	449	185	317	461	407	351	115	297	250	252	447	343	427	171	384	503	299	522	291	347	429	179	312	336
223	338	284	434	313	402	493	120	609	80	391	417	447	419	187	351	501	374	505	320	341	397	315	293	125	358	213	311	533	377	434	103	213	297	191	421	468	468	204	286	442	263	560	335	303	374	279	276	253
224	454	129	412	460	388	427	91	648	232	398	470	328	316	203	418	535	442	618	324	228	376	241	329	170	378	223	354	449	488	437	69	280	312	174	401	235	410	192	405	394	358	584	385	285	491	199	241	282
225	439	160	352	407	408	535	114	665	238	387	492	323	397	136	430	587	368	572	283	453	311	215	329	198	458	238	404	368	435	404	189	314	234	243	471	317	378	276	339	576	316	504	349	341	394	270	353	239
226	422	187	498	425	438	578	102	676	146	264	438	326	363	266	389	476	262	571	348	484	398	325	269	105	524	114	324	509	420	392	91	339	290	200	421	291	363	146	417	476	406	489	356	282	484	317	273	198
227	418	272	373	480	375	550	53	769	191	284	357	357	406	134	379	526	415	667	302	308	383	236	278	184	439	187	347	449	400	411	76	238	325	165	403	331	407	196	397	514	398	530	302	267	492	219	359	247
228	434	176	455	436	501	461	101	702	91	310	475	333	338	183	293	555	391	636	407	369	469	291	327	195	512	202	351	334	459	530	34	266	332	238	438	326	391	190	328	472	373	601	194	354	374	346	217	170
229	407	235	433	373	414	373	136	713	249	303	460	359	480	185	361	504	329	587	430	314	356	285	392	257	354	198	296	502	398	447	83	317	264	189	402	256	455	189	315	528	321	602	265	306	368	312	228	188
230	345	140	406	470	413	496	7	651	203	238	386	257	497	172	364	532	404	533	293	291	387	221	294	160	418	222	373	409	422	439	75	360	203	233	356	320	351	215	297	469	340	513	307	216	458	185	372	226
231	421	231	439	398	445	423	151	579	258	306	366	385	351	179	397	569	364	586	303	265	318	258	298	164	486	167	387	506	472	401	67	302	191	245	472	323	377	226	428	456	367	590	312	274	409	220	268	209
232	411	177	428	414	383	475	113	796	226	340	578	331	415	80	300	437	334	580	301	312	396	199	225	246	423	212	281	496	340	409	90	346	272	488	482	271	391	283	420	465	398	568	352	362	367	116	303	164
233	464	211	486	390	384	530	88	615	202	279	360	201	386	151	405	548	310	510	363	345	371	240	315	219	439	242	341	473	378	411	80	249	222	228	476	257	391	294	356	472	322	548	207	237	418	229	324	180
234	436	201	294	370	432	351	105	605	267	409	410	407	354	136	373	484	373	496	380	357	490	277	344	118	420	246	285	434	470	401	152	273	207	341	496	336	409	153	348	460	332	542	258	298	415	249	306	184
235	382	120	360	482	380	475	-14	854	174	324	442	368	400	162	271	490	301	517	304	224	285	175	223	213	411	207	324	435	408	401	95	323	300	252	327	284	411	286	357	487	317	576	280	202	514	210	225	244
236	357	156	548	532	421	337	73	582	163	353	542	394	469	183	401	458	340	627	376	333	374	201	258	166	413	211	442	473	393	510	126	311	238	282	509	364	442	217	328	486	388	598	307	335	297	258	231	134
237	346	279	406	373	391	409	136	561	175	247	424	227	337	171	386	501	341	582	244	315	362	147	254	116	418	183	358	476	437	457	114	253	230	272	404	334	378	198	332	498	402	650	240	326	453	159	239	280
238	366	181	374	308	409	363	97	811	201	354	359	336	401	238	340	562	313	630	352	387	355	219	273	241	446	183	360	437	476	440	87	349	241	336	557	225	466	139	332	423	440	518	335	292	409	178	191	186
239	343	153	513	496	369	488	43	579	148	265	515	312	368	168	341	531	369	543	316	374	326	203	397	129	440	192	303	449	367	409	83	350	196	225	463	344	362	124	326	513	399	486	326	234	306	159	280	175
240	342	144	356	409	372	453	106	663	195	284	434	366	331	193	341	447	342	506	277	360	514	276	320	190	407	203	274	441	455	454	156	234	197	275	429	306	360	275	388	530	396	431	311	223	316	161	268	185
241	393	128	414	390	381	469	124	575	203	328	274	334	293	185	287	549	420	657	309	322	334	189	349	118	326	98	264	383	341	417	131	235	227	294	404	381	438	223	376	440	350	603	271	288	422	270	339	169
242	349	135	413	353	378	372	76	547	305	260	457	240	252	260	474	507	400	612	250	326	287	237	361	225	459	246	294	343	431	467	63	140	264	270	452	294	401	207	340	484	343	507	366	270	445	229	278	161
243	364	281	446	405	486	356	65	380	317	374	505	278	404	112	293	548	242	527	265	207	393	264	326	188	446	136	333	466	482	384	112	336	297	301	452	273	391	246	388	425	377	567	328	204	522	245	334	103
244	322	56	245	409	449	438	74	612	217	357	239	270	487	233	305	491	447	531	335	286	326	303	313	216	385	253	359	457	349	411	74	338	359	327	426	362	350	215	306	495	357	545	442	301	536	129	360	208
245	347	184	256	417	398	491	88	380	142	311	406	310	447	146	382	429	409	552	282	231	482	188	308	205	419	219	305	425	385	421	129	237	218	236	421	224	386	237	427	453	293	586	329	237	371	194	128	168
246	383	173	227	416	312	446	50	568	177	350	480	287	335	145	301	427	343	523	314	216	500	260	249	170	440	272	438	446	379	498	-32	256	289	315	412	344	453	245	401	547	398	398	391	251	349	199	343	240
247	353	78	276	355	460	406	53	571	200	398	403	372	509	174	356	378	324	516	303	333	328	197	321	134	474	189	294	435	416	575	132	340	247	254	524	330	394	229	378	438	363	564	354	298	429	189	258	269
248	417	227	263	368	437	468	56	468	285	339	543	347	363	129	329	627	278	483	248	312	404	285	317	189	378	210	400	323	405	315	128	358	389	260	498	297	408	144	337	469	443	563	361	219	389	256	253	109
249	420	265	313	456	440	374	47	407	215	435	548	333	440	191	347	521	400	635	282	335	453	298	337	277	427	192	293	429	347	507	78	284	274	342	334	338	387	165	382	396	421	372	298	321	340	274	202	166
250	273	178	222	527	413	373	109	387	172	359	591	280	275	194	356	468	328	659	337	319	377	186	292	184	473	179	335	464	381	423	130	340	182	365	451	236	386	128	365	480	389	566	352	288	413	186	339	250
251	399	171	309	386	375	411	141	287	297	308	476	381	421	208	308	426	358	559	304	314	425	295	306	206	476	181	345	370	468	333	99	266	221	373	438	286	358	162	384	545	268	613	273	294	394	245	292	199
252	496	169	254	405	396	423	72	229	217	329	438	306	318	172	388	494	449	582	282	317	404	220	233	73	429	206	455	421	418	475	85	128	281	267	345	225	399	141	345	435	330	656	362	228	414	272	298	207
253	365	181	240	469	365	486	66	667	226	282	416	333	466	151	284	562	329	552	253	291	442	216	225	211	403	162	370	382	416	404	100	267	262	252	385	255	390	227	353	501	380	533	311	286	467	226	234	202
254	292	200	295	462	438	550	157	449	188	358	428	243	357	271	408	582	376	612	355	386	451	211	277	216	502	101	403	381	472	414	50	265	214	269	526	247	225	180	291	413	414	637	359	321	387	284	287	198
255	394	244	229	410	453	358	78	332	236	329	442	307	411	220	351	479	343	603	291	319	446	367	372	198	476	141	267	382	311	486	140	269	180	335	523	400	375	307	339	442	295	491	321	285	547	210	239	181
256	354	220	259	340	383	396	60	392	311	420	401	421	356	162	371	572	350	561	326	307	372	216	318	157	426	246	450	425	327	411	87	157	281	283	355	423	438	207	304	396	295	563	314	252	296	185	283	182
257	507	195	305	376	473	409	71	318	158	305	454	280	444	260	282	450	352	530	347	244	405	305	164	213	519	160	365	478	481	491	36	323	258	381	475	323	466	195	196	435	356	544	287	265	440	220	267	235
258	360	82	250	359	376	452	117	381	181	295	410	361	414	118	281	443	333	527	291	311	395	340	304	215	450	189	430	444	388	269	11	335	232	261	481	328	400	156	379	432	387	580	371	252	438	229	349	221
259	385	236	366	417	402	405	140	406	263	308	483	353	338	172	307	456	344	457	297	280	384	234	361	239	547	153	398	442	370	336	35	317	309	235	507	428	431	139	336	470	397	616	384	267	455	250	294	193
260	363	228	248	418	389	425	81	348	176	330	382	293	263	189	354	440	397	492	322	329	369	233	256	97	496	210	377	483	501	363	-3	317	261	191	413	327	376	177	316	533	292	601	329	231	423	240	203	74
261	449	205	299	547	497	472	20	306	238	338	433	383	404	162	396	538	316	558	305	297	389	255	266	198	470	177	428	337	406	392	39	261	166	253	379	342	449	201	396	546	322	585	296	232	465	164	300	74
262	399	177	279	397	377	434	116	320	235	352	278	277	374	230	377	523	446	528	299	251	411	252	209	206	425	185	302	367	428	458	114	290	200	334	427	314	358	169	350	566	326	650	288	280	394	177	334	211
263	351	258	372	393	407	411	52	331	233	314	400	213	445	134	352	469	361	642	294	305	367	227	363	222	512	171	312	495	419	477	65	351	263	294	461	354	423	280	377	452	438	626	239	249	381	218	272	228
264	459	123	400	347	446	381	77	410	237	320	438	447	392	136	345	422	291	544	303	350	392	263	207	246	469	196	327	343	442	454	92	241	303	371	385	354	492	186	418	357	404	717	380	240	381	282	250	333
265	422	214	451	426	518	325	79	212	197	288	419	388	320	183	386	485	268	532	302	293	305	290	344	97	432	90	374	404	475	384	52	189	206	217	526	328	399	258	393	543	343	535	342	245	434	208	317	111
266	416	260	579	389	468	413	72	314	175	393	372	313	365	181	336	624	367	512	335	303	553	282	315	181	552	157	421	388	439	454	125	395	162	305	468	272	371	236	283	377	321	565	288	306	465	329	180	173
267	435	127	478	404	464	543	109	398	204	397	407	277	430	114	394	437	330	593	316	256	348	269	257	136	495	92	399	374	487	428	100	308	245	304	418	268	439	164	385	505	404	667	305	258	423	134	313	322
268	340	191	702	441	462	445	108	460	187	369	407	345	313	111	360	481	245	583	379	216	436	269	320	209	473	156	409	465	437	521	99	250	305	295	401	300	452	143	393	524	355	584	174	299	356	152	235	239
269	289	198	570	321	334	401	42	344	237	414	406	240	382	209	354	416	313	558	378	305	425	236	424	173	536	149	372	431	476	415	19	287	170	227	479	282	384	198	451	540	359	670	242	334	450	186	247	141
270	316	218	579	321	502	413	109	246	195	317	522	291	331	141	365	587	334	581	302	242	345	296	332	107	422	197	307	553	402	461	124	296	270	277	535	407	352	159	224	428	435	646	330	229	360	212	233	287
271	374	187	661	372	451	430	93	301	133	421	424	258	297	200	471	386	408	455	280	268	466	203	264	216	518	194	327	409	380	515	98	294	225	309	435	380	371	316	370	423	341	601	360	284	376	190	313	171
272	436	210	533	384	395	502	59	341	171	376	546	353	319	109	357	405	329	525	305	321	342	205	270	168	497	195	413	458	429	487	83	241	193	350	360	302	502	229	385	382	395	635	347	172	461	189	289	221
273	324	183	568	442	363	407	57	342	295	304	433	327	425	176	465	467	363	535	291	335	389	173	204	135	439	201	368	392	456	572	92	288	250	289	486	350	444	170	407	402	377	715	327	296	441	168	314	147
274	420	179	406	316	410	457	87	333	154	399	384	370	351	182	306	476	365	650	284	258	412	239	233	155	473	171	455	472	484	455	38	283	274	294	390	281	383	318	262	502	391	537	209	249	347	242	151	206
275	374	135	448	379	361	460	22	329	231	304	503	325	349	189	330	391	304	648	313	270	312	251	329	101	410	147	427	378	487	401	109	339	311	282	472	385	401	230	366	440	367	617	319	314	307	309	313	269
276	368	192	606	336	414	405	129	653	258	348	389	380	346	148	331	437	484	529	383	283	348	183	272	148	475	194	363	369	471	419	109	293	173	339	440	285	470	215	319	487	320	600	261	342	419	163	192	189
277	381	160	299	561	507	429	55	319	248	413	517	335	458	233	346	480	215	534	311	262	340	161	122	210	588	261	323	465	527	461	120	269	183	285	384	457	428	107	398	430	388	512	315	273	457	312	391	173
278	350	254	307	425	403	469	104	485	208	371	337	263	438	258	348	559	449	497	341	312	364	227	333	214	531	223	293	362	392	521	95	244	292	272	378	282	429	231	276	585	377	526	219	375	456	231	267	119
279	267	253	396	363	572	542	52	337	217	391	394	325	477	162	299	447	318	594	327	306	437	245	278	214	484	179	373	416	368	518	113	257	254	216	484	235	532	354	381	398	415	648	331	300	371	287	299	265
280	404	210	535	362	444	424	64	366	269	345	572	416	472	117	325	511	241	578	299	355	327	271	350	167	508	218	349	484	463	481	92	284	301	257	516	349	346	180	285	449	323	620	311	251	399	221	358	135
281	426	211	477	293	417	406	85	407	271	471	429	241	461	209	322	472	307	645	257	340	364	180	268	159	405	208	374	373	472	535	150	377	309	262	465	223	389	282	209	450	364	611	297	318	434	271	226	181
282	399	206	474	441	428	427	134	352	334	352	418	306	431	57	376	486	427	689	265	284	408	270	294	217	424	150	380	521	448	387	96	249	233	319	468	351	395	188	360	446	378	675	333	329	494	310	236	65
283	357	150	442	424	417	448	60	397	333	307	439	274	491	204	374	421	300	569	302	330	378	231	384	232	337	175	339	515	415	461	117	263	271	300	310	381	431	218	326	422	284	553	273	165	420	115	281	180
284	377	281	276	470	359	484	51	332	285	313	422	337	269	94	328	505	207	628	446	269	515	179	308	145	482	185	307	388	380	422	117	304	163	315	390	273	399	119	355	482	244	658	271	312	321	209	387	232
285	389	161	462	448	421	472	17	379	307	418	436	373	366	241	273	488	276	623	323	249	407	253	213	253	492	157	417	506	482	425	121	300	254	305	446	278	435	244	386	523	380	553	426	257	378	242	378	282
286	376	236	396	397	367	495	62	344	168	415	561	370	381	191	439	590	449	556	333	353	456	292	189	150	505	207	297	435	450	348	101	341	249	289	459	285	429	114	343	506	398	527	359	273	407	176	204	249
287	430	269	406	351	335	453	78	360	193	305	443	235	409	200	423	421	317	567	260	348	420	277	355	204	422	152	387	368	534	445	118	299	192	246	490	414	354	218	401	405	250	778	349	236	419	227	290	241
288	401	156	381	364	524	443	108	291	299	353	433	439	421	186	254	495	174	682	312	313	364	310	300	197	412	143	310	548	341	512	117	215	237	259	415	236	457	223	383	441	345	550	345	289	333	215	359	153
289	404	190	336	409	463	407	6	369	199	349	505	245	421	245	347	469	278	594	401	348	425	283	220	128	444	191	466	492	441	475	73	291	309	249	405	361	459	300	356	485	366	586	346	259	427	197	291	270
290	396	186	414	399	435	412	70	382	164	287	527	336	406	144	302	518	343	657	353	389	393	194	206	210	479	236	317	306	480	470	58	312	258	458	560	271	324	316	283	630	268	489	328	213	356	319	256	218
291	485	203	463	435	452	495	106	382	282	353	519	353	329	202	307	573	368	654	344	281	344	222	148	241	383	151	285	403	440	451	59	294	319	266	431	352	394	198	382	441	344	587	250	312	463	263	278	187
292	422	212	339	413	410	435	119	354	284	331	387	414	311	198	385	532	419	641	231	341	318	216	292	144	482	275	264	472	463	443	117	262	241	304	461	349	332	168	326	552	381	530	301	255	445	205	272	171
293	415	271	465	439	504	519	73	364	215	288	381	303	334	191	363	484	409	584	222	338	362	193	286	130	484	250	299	300	386	444	77	257	228	150	395	296	471	325	330	471	375	534	319	352	404	258	246	167
294	367	230	356	392	449	365	20	382	248	378	421	346	464	104	415	492	426	580	337	416	373	212	288	187	431	123	309	375	512	373	140	356	245	398	395	328	392	166	317	367	365	496	374	244	413	180	319	175
295	337	211	431	396	446	330	96	320	223	251	382	270	438	130	340	467	427	622	368	311	378	335	331	217	501	138	344	429	424	491	27	229	234	322	514	402	437	217	314	535	263	519	385	346	437	239	251	119
296	488	170	452	424	471	382	48	344	212	368	449	377	471	171	319	540	305	590	397	270	379	249	282	160	472	235	290	463	422	539	105	268	157	297	572	311	422	207	312	483	390	543	347	310	468	287	281	261
297	427	179	503	295	401	421	72	410	184	364	407	303	421	214	348	614	320	670	339	373	355	176	309	174	401	169	327	425	542	533	112	348	214	284	432	318	419	152	399	526	342	521	293	321	395	167	342	76
298	388	239	305	385	405	434	29	277	148	341	457	313	355	138	434	395	384	690	359	299	502	266	206	118	475	240	361	418	483	492	128	289	268	295	422	269	427	178	293	485	324	624	263	306	365	194	240	109
299	377	220	404	417	463	404	69	282	280	442	472	454	322	235	390	474	316	544	240	388	424	248	266	108	378	59	383	457	529	404	115	277	289	359	504	360	393	208	374	517	337	563	349	238	359	273	348	138
300	423	170	407	363	400	487	95	314	242	300	511	347	367	143	388	487	315	465	334	250	418	265	261	230	500	199	360	491	490	350	88	261	279	179	540	239	370	182	285	470	390	704	307	188	340	336	292	230
301	410	171	327	437	443	402	39	258	259	370	552	287	402	88	355	580	296	542	267	305	395	153	280	206	482	179	410	471	494	459	17	240	322	354	540	280	435	190	302	400	350	662	204	239	383	257	330	243
[truncated: 96 more columns]

## Sheet: AWC,ASE unc18 Rescue
Figures 4I, 4S-1D
AIA::GCaMP5A F(A.U.)
Stimulus:	AWA::Chrimson
Genotype:	WT
N:	1	2	3	4	5	6	7	8	9	10	11	12	13	14	15	16	17	18	19	20	21	22	23	24	25	26	27	28	29	30	31	32	33	34	35	36	37	38	39	40	41	42	43	44	45	46	47	48	49
Frame (Pulse at 100)
1	269	432	508	442	707	346	234	149	199	378	498	515	237	335	63	297	451	448	554	217	708	164	265	223	341	280	222	105	149	289	383	306	288	338	309	106	894	323	379	205	342	486	506	499	679	171	317	85	248
2	268	439	498	497	706	286	279	56	250	395	386	457	336	299	161	273	455	431	440	93	566	206	245	263	287	316	240	166	167	170	377	251	324	295	318	153	774	343	273	158	302	388	464	566	741	268	143	109	154
3	230	391	385	566	791	266	250	138	202	427	477	483	241	192	211	283	444	459	557	304	578	108	369	291	214	348	245	126	67	182	423	328	388	357	443	134	889	318	290	211	366	440	444	593	578	237	266	12	194
4	193	467	436	578	675	204	316	39	94	517	440	465	241	280	185	263	505	484	502	266	573	164	193	249	404	308	166	144	124	239	371	325	246	320	330	122	919	273	346	222	397	337	413	545	710	321	222	140	270
5	310	421	558	531	659	250	238	50	154	566	496	451	312	297	162	209	492	643	449	259	634	45	361	255	260	253	290	181	135	257	577	347	353	404	350	156	865	252	274	218	385	564	336	498	593	269	243	28	178
6	292	458	378	524	667	270	313	82	76	482	491	388	224	298	203	387	347	476	393	223	552	127	306	211	277	236	261	195	123	205	334	330	318	431	313	159	765	338	325	180	312	465	346	639	624	231	192	100	206
7	264	451	469	498	752	289	193	146	236	481	388	393	313	356	108	282	510	434	443	272	619	65	296	139	294	338	263	150	94	195	419	316	422	269	332	34	857	290	333	179	253	478	355	645	665	216	244	214	202
8	176	454	481	672	804	323	239	112	160	524	549	397	233	279	232	317	448	430	450	229	580	180	253	226	339	211	225	139	130	188	407	310	340	282	361	256	722	298	379	230	347	474	382	423	715	243	310	123	223
9	247	439	498	548	658	303	254	196	175	440	506	356	272	369	130	288	480	462	520	214	594	98	182	130	300	313	334	139	156	240	490	309	321	386	377	103	827	230	405	149	322	534	367	482	787	344	216	62	137
10	360	497	462	511	562	368	197	153	236	424	339	386	296	364	146	287	453	351	464	264	628	136	302	228	274	321	206	123	82	153	382	231	331	322	355	117	754	358	485	211	283	392	423	515	603	284	232	82	111
11	314	347	455	592	786	277	187	18	179	599	483	443	255	279	140	311	492	334	410	235	599	171	271	203	282	293	324	125	173	236	381	309	288	196	343	122	717	270	285	126	426	448	334	594	652	223	187	103	150
12	253	396	457	374	652	214	216	132	89	462	422	442	301	261	149	337	403	459	459	225	540	150	271	181	251	264	236	138	150	182	341	281	266	399	355	211	891	284	303	257	306	349	400	551	688	224	103	61	171
13	386	451	403	691	678	222	179	138	171	391	568	369	402	378	203	327	437	398	492	222	607	133	268	299	222	256	258	76	49	135	429	328	392	289	359	240	792	246	361	197	319	341	371	578	590	240	254	101	168
14	153	440	451	618	638	218	207	123	86	405	509	478	315	335	99	329	415	420	452	158	594	129	353	257	325	361	205	143	2	228	457	331	288	365	347	180	730	406	360	183	311	432	529	488	586	245	257	104	125
15	252	449	475	582	646	262	249	132	150	483	502	585	284	343	136	398	486	401	425	226	624	79	211	210	245	339	256	132	139	247	342	277	307	293	330	155	747	349	388	199	367	393	363	529	654	202	228	117	153
16	315	427	393	624	682	297	329	38	246	378	507	483	249	333	86	323	443	485	387	269	469	152	228	193	298	300	187	80	135	231	447	341	379	354	311	104	661	345	346	210	296	459	375	542	701	235	228	132	200
17	399	449	474	535	704	346	334	30	159	375	541	417	192	341	199	322	428	435	456	265	618	96	259	207	236	307	248	90	171	144	416	321	293	386	421	84	711	319	345	166	276	488	447	508	684	281	223	137	133
18	360	369	341	459	679	311	310	62	118	489	496	328	253	431	104	389	397	397	459	188	548	192	215	209	306	256	272	121	164	190	456	286	326	325	325	186	779	300	404	251	369	447	362	524	634	202	240	100	226
19	356	398	402	512	694	355	285	84	204	481	407	417	318	276	56	237	453	514	580	151	579	132	305	174	391	231	198	147	146	183	385	294	262	309	259	69	702	301	283	251	336	470	347	536	723	222	155	125	187
20	291	380	474	514	744	202	263	117	154	426	523	375	299	339	153	340	438	416	358	242	613	102	202	200	300	269	342	128	83	223	391	304	379	425	318	145	733	292	376	224	311	597	453	566	708	236	248	80	166
21	272	375	410	542	654	247	202	102	180	419	583	376	247	337	128	406	496	377	487	136	509	157	223	259	273	324	219	173	148	225	364	312	343	325	367	157	724	195	315	234	233	403	382	494	689	320	211	61	184
22	187	307	392	593	610	241	144	101	132	446	584	453	365	375	133	404	317	571	409	222	635	148	250	330	360	210	206	217	136	182	418	297	322	352	303	179	622	386	355	258	256	474	460	422	650	249	215	76	142
23	251	462	462	433	779	346	225	101	247	441	453	361	297	325	98	341	310	438	564	221	514	93	207	206	274	323	188	109	53	269	427	357	256	304	270	186	680	369	347	313	338	474	519	505	764	324	204	196	172
24	365	366	366	645	660	266	215	151	196	407	393	399	275	279	200	307	473	431	423	267	617	127	240	276	303	327	140	162	171	252	332	281	371	332	303	184	595	254	365	209	359	494	518	615	591	341	270	92	155
25	321	410	396	531	697	297	297	122	181	440	416	504	191	339	203	394	414	283	449	251	428	129	240	267	332	294	249	172	98	177	365	373	363	390	325	123	636	300	353	239	355	421	413	496	637	324	342	6	118
26	319	463	330	546	705	331	157	170	210	371	422	464	261	429	87	392	370	433	374	190	605	77	262	215	307	277	277	171	181	215	365	362	349	336	368	120	672	335	357	267	434	483	467	555	795	284	253	144	282
27	268	466	364	567	738	205	243	24	121	432	430	354	250	334	220	348	446	303	467	219	503	222	218	139	223	326	148	145	133	184	421	366	255	339	305	184	638	356	411	176	378	318	522	446	578	257	246	174	100
28	222	451	437	568	598	337	244	118	110	525	455	324	280	343	190	246	400	319	479	242	541	143	293	186	292	204	231	110	130	160	395	264	336	299	332	108	729	255	371	132	278	422	476	565	597	162	295	27	223
29	410	398	396	568	569	333	209	127	170	470	389	432	274	376	90	287	467	430	425	233	522	110	255	248	206	254	180	160	125	176	471	357	298	285	413	156	621	315	336	250	276	498	496	431	663	261	209	29	247
30	198	430	551	553	661	216	165	132	98	458	474	384	208	364	113	370	374	405	508	114	687	123	242	212	246	252	253	168	122	217	419	381	305	356	296	122	642	273	272	248	347	427	436	470	607	202	268	80	153
31	301	487	513	506	670	272	242	0	200	386	321	557	195	393	152	399	410	360	522	146	597	198	263	187	287	441	251	193	171	193	413	336	367	326	362	147	560	283	323	249	291	357	427	505	707	270	218	79	191
32	266	514	324	638	665	250	251	116	145	475	498	374	236	357	116	361	411	525	481	232	534	136	371	159	337	348	173	98	101	150	366	286	239	371	320	114	594	352	259	204	314	362	425	591	705	299	273	99	246
33	299	437	436	643	698	425	276	122	197	467	489	464	374	319	171	254	408	502	369	244	636	145	238	146	205	458	204	137	112	266	473	330	238	346	399	129	629	316	275	145	243	406	475	619	659	306	219	125	262
34	222	426	519	605	810	228	310	34	297	628	455	414	330	383	61	359	496	438	442	190	528	95	156	187	294	547	245	83	163	273	375	308	334	394	316	152	680	288	376	188	303	373	508	533	575	237	162	53	212
35	278	406	504	618	631	336	201	88	172	436	512	548	286	381	199	271	513	445	473	229	508	132	167	239	233	489	250	222	96	190	319	375	293	249	360	135	691	270	319	218	328	460	450	465	703	347	230	29	199
36	299	547	386	534	607	310	276	81	163	441	550	630	289	361	129	293	513	395	419	243	484	189	258	197	264	513	283	155	135	229	374	301	430	328	292	229	651	251	304	207	239	449	442	421	767	160	289	99	252
37	244	388	451	590	616	284	213	119	189	461	399	355	296	312	165	255	404	485	402	214	536	69	291	278	378	500	184	150	97	185	419	320	375	277	258	142	621	390	235	241	296	419	427	570	775	288	277	90	128
38	328	526	485	623	654	354	272	-17	234	358	430	479	364	333	178	367	369	395	498	255	503	169	297	253	377	587	230	87	74	212	382	248	339	364	327	136	587	359	428	127	354	502	476	517	592	290	311	66	132
39	342	413	372	649	693	267	259	91	146	454	474	473	146	273	219	321	415	508	442	305	645	132	251	202	368	478	249	171	95	172	438	320	309	311	359	136	711	298	415	174	401	450	313	552	720	235	273	136	124
40	348	378	368	621	660	321	294	102	118	548	438	473	327	328	126	204	426	358	486	241	586	154	306	203	325	472	223	167	98	191	375	291	306	487	352	259	703	335	309	273	314	446	582	529	638	254	234	131	171
41	338	390	447	520	621	236	246	58	201	516	541	411	274	184	100	331	493	399	406	226	597	108	161	280	396	460	317	178	99	251	378	233	330	542	301	150	625	280	348	235	328	516	544	513	701	329	129	133	206
42	300	429	455	549	724	245	383	132	141	513	484	467	281	264	86	301	409	548	455	206	529	126	258	285	341	533	225	180	186	290	387	330	319	510	341	168	614	274	365	171	295	431	414	527	697	290	197	69	213
43	386	379	360	387	561	366	310	26	136	522	399	405	309	135	145	343	461	395	452	237	475	118	209	256	341	432	185	129	98	253	482	314	267	500	320	173	595	261	383	142	349	392	458	443	654	357	186	78	227
44	276	422	366	573	556	301	204	106	213	320	531	407	178	278	57	340	516	400	461	251	448	177	235	200	325	463	187	153	176	176	447	362	428	629	329	133	631	312	329	207	316	453	408	507	723	229	196	130	166
45	331	508	442	576	585	279	234	80	202	496	411	483	252	171	101	184	461	425	441	136	523	110	250	201	423	463	177	75	126	223	390	319	383	561	362	234	582	310	388	173	367	457	456	527	663	246	302	106	244
46	309	467	363	487	689	206	299	76	182	540	453	475	343	282	147	262	438	487	372	205	544	178	251	265	293	468	272	131	110	206	399	158	337	544	262	199	654	264	321	249	266	418	561	447	591	317	220	70	275
47	306	482	408	535	608	288	260	109	244	507	470	393	328	285	176	262	393	499	459	290	631	82	239	224	236	378	264	110	82	215	449	342	283	562	343	134	542	285	333	199	287	529	401	528	597	265	323	54	164
48	262	400	391	622	558	287	243	68	260	383	359	436	210	194	160	343	445	464	454	225	480	56	218	226	391	441	197	166	172	166	458	287	349	546	343	171	604	367	281	186	343	464	479	509	687	265	306	106	189
49	295	367	428	542	635	277	317	106	230	381	562	541	236	272	184	372	414	447	440	275	545	153	240	264	350	392	208	166	135	237	371	315	311	512	386	176	589	269	306	197	325	481	471	392	679	284	197	142	273
50	184	479	404	584	614	188	192	162	233	436	503	364	316	236	162	293	479	518	493	303	541	160	231	168	246	406	192	195	134	183	269	366	296	531	338	228	608	329	361	207	332	372	461	574	755	259	212	86	205
51	230	434	548	646	678	280	190	144	198	513	433	366	343	283	129	409	478	446	460	235	530	201	206	248	437	293	258	43	164	255	409	328	341	547	317	150	679	369	248	267	228	475	477	485	631	318	335	90	156
52	254	543	412	513	601	214	318	72	201	438	422	394	287	218	128	346	346	454	389	262	537	190	218	220	414	360	156	174	186	224	350	232	433	507	315	202	495	397	371	240	350	362	473	478	666	200	215	195	195
53	292	376	564	677	545	289	229	118	212	456	477	439	297	179	106	341	384	259	356	202	567	169	264	262	363	438	183	40	104	133	531	317	317	578	328	164	603	379	385	216	396	431	438	630	635	142	240	132	171
54	340	359	421	516	678	333	199	48	198	490	495	478	234	237	123	293	503	406	453	207	525	71	216	190	440	419	250	112	117	210	421	316	351	541	277	38	631	283	338	249	193	523	621	460	724	271	257	39	207
55	272	570	313	517	554	276	270	164	228	573	355	381	396	238	190	303	464	477	477	233	450	236	217	281	368	375	244	104	117	145	370	238	325	556	310	261	511	318	314	245	389	470	449	536	615	290	287	146	170
56	344	384	419	401	544	269	210	102	152	391	439	479	186	268	73	280	390	450	399	255	630	91	264	244	326	385	267	149	129	221	447	405	375	624	300	225	686	290	335	148	499	410	484	490	716	253	324	60	241
57	265	492	401	478	596	252	212	133	172	332	382	579	202	332	196	321	457	475	500	230	510	227	232	246	365	356	299	140	72	217	424	285	292	454	470	158	630	300	339	206	335	565	392	515	635	290	233	92	263
58	354	399	435	497	581	242	248	36	163	492	381	308	333	357	220	271	372	479	500	220	529	203	275	212	350	303	159	116	65	196	434	306	425	608	384	116	683	363	285	162	360	371	400	506	707	242	330	185	245
59	359	476	459	506	541	225	272	126	173	456	418	377	176	231	148	397	395	406	508	117	459	250	260	290	377	275	251	86	147	238	377	351	369	565	307	175	551	289	296	325	278	472	411	543	609	199	198	93	192
60	356	457	492	318	628	300	337	21	149	503	496	471	236	196	124	269	446	400	384	265	545	194	256	198	383	321	239	151	92	301	386	377	286	581	339	145	591	241	357	281	326	449	501	457	655	241	283	92	274
61	312	323	460	521	755	351	200	130	163	389	578	461	126	223	177	318	407	409	426	227	526	209	226	282	390	196	310	60	74	221	341	301	314	572	274	103	540	242	414	155	389	512	524	494	624	262	285	98	183
62	258	465	336	632	658	282	357	21	308	539	422	499	332	171	139	330	295	466	415	240	534	141	245	227	354	354	209	169	161	260	379	303	382	546	298	120	549	346	331	215	206	478	541	451	512	327	243	189	159
63	286	492	492	449	772	191	247	107	177	477	512	310	354	242	202	399	420	300	423	269	475	106	203	174	408	278	189	117	113	215	352	420	359	544	316	108	588	380	297	253	234	505	538	489	726	280	232	181	338
64	181	401	387	450	653	380	269	127	121	472	538	457	251	282	91	355	392	474	454	215	512	175	218	149	450	246	166	72	202	240	349	296	423	566	329	113	607	333	364	162	314	462	554	499	786	265	248	124	158
65	246	448	506	542	638	199	271	60	282	365	478	473	188	344	171	307	389	361	462	181	466	221	183	241	419	304	175	148	173	154	343	305	307	519	236	180	581	277	329	120	390	390	502	470	660	196	244	114	141
66	197	433	486	683	574	376	401	144	185	542	473	436	214	235	121	397	523	503	484	208	583	120	150	238	490	336	153	180	110	249	516	241	218	627	323	183	598	307	375	244	333	361	544	569	680	256	290	76	162
67	273	458	490	585	527	184	287	104	250	358	488	450	201	222	190	353	447	429	502	278	541	153	146	157	378	274	262	202	113	206	404	404	323	494	400	154	566	201	395	193	319	435	610	659	669	354	308	119	247
68	356	501	492	591	558	308	245	20	219	291	492	396	292	228	188	354	417	364	502	176	536	166	206	282	309	352	285	89	105	233	426	316	374	647	427	174	568	422	360	93	384	423	581	496	566	341	231	94	283
69	321	412	349	434	663	322	248	173	130	362	476	548	277	281	125	260	442	521	377	261	571	169	258	231	377	265	256	104	57	193	451	336	309	514	328	163	626	334	362	183	308	454	458	657	684	185	245	170	167
70	269	454	356	570	609	312	296	77	167	354	497	406	190	305	213	375	451	378	470	162	420	91	173	218	325	273	178	78	71	309	482	322	330	582	345	138	700	350	329	248	263	493	460	448	529	288	296	127	216
71	403	600	455	558	652	319	120	106	56	361	480	300	252	197	117	298	381	492	577	310	423	174	129	218	494	304	174	67	95	182	456	271	406	603	272	137	590	193	266	222	331	403	471	500	685	397	192	172	214
72	429	438	482	534	591	297	260	120	75	403	447	393	402	191	186	221	445	444	527	219	594	195	128	221	394	353	127	138	157	187	397	270	308	541	314	88	659	285	340	243	280	481	333	533	625	246	268	121	183
73	287	384	505	505	590	265	275	82	181	503	450	392	322	224	45	356	409	424	634	293	498	225	232	255	376	234	201	179	136	294	459	289	357	558	337	97	630	388	346	156	354	403	459	497	829	243	164	93	153
74	306	394	534	433	786	337	321	8	203	512	423	385	215	139	207	374	410	381	453	304	428	152	197	144	363	267	309	152	192	225	400	305	349	554	300	173	604	349	381	167	287	411	359	492	658	305	214	172	177
75	251	484	447	620	664	253	155	110	204	415	482	392	251	170	206	294	593	417	560	236	457	108	170	274	355	255	307	183	117	221	323	350	332	581	292	80	703	326	367	166	287	347	498	491	690	273	253	23	223
76	282	499	432	527	596	302	210	166	187	426	453	576	353	369	95	279	444	389	560	155	545	91	265	167	342	268	172	149	80	281	464	279	309	553	447	75	622	329	440	206	340	438	409	448	655	331	249	48	205
77	342	452	402	448	589	342	281	-9	273	442	483	453	327	299	241	338	380	439	510	188	576	129	109	164	477	188	184	162	185	286	408	291	346	578	341	164	650	457	368	139	409	429	431	594	706	219	257	41	196
78	348	388	526	420	605	313	302	113	162	405	440	483	181	218	83	352	382	434	567	234	509	125	226	228	412	320	190	134	101	221	374	342	302	581	348	114	651	312	323	75	327	392	474	502	641	281	202	79	143
79	356	481	561	496	579	226	256	182	168	381	461	456	298	239	116	392	470	395	415	48	611	157	228	188	373	258	164	231	183	301	504	298	286	609	375	162	584	247	321	207	320	456	392	554	702	280	232	76	236
80	375	367	522	549	669	294	289	75	178	370	392	408	94	314	86	314	499	494	550	205	561	134	156	158	252	235	291	122	71	220	462	295	290	508	296	233	634	259	328	219	367	463	498	544	625	190	287	159	208
81	321	422	515	573	517	233	263	78	114	406	447	463	261	305	136	288	438	390	601	163	564	156	180	240	396	319	198	114	115	230	303	255	349	493	310	162	606	278	326	223	359	441	400	590	518	206	184	138	202
82	407	338	556	530	723	343	302	16	214	380	394	513	178	224	140	419	445	356	507	213	433	231	196	159	375	275	162	67	171	224	357	251	281	610	302	85	700	286	242	164	211	373	456	494	642	230	336	48	211
83	241	362	546	503	691	197	258	94	163	341	520	358	327	276	162	299	453	506	542	157	627	70	233	200	277	261	143	32	68	161	424	291	262	476	417	104	705	285	341	211	288	401	361	632	583	269	209	144	227
84	331	498	477	418	630	276	251	143	263	413	530	477	338	249	185	454	426	366	497	167	743	202	158	236	391	317	263	16	67	188	439	344	392	555	329	128	670	260	376	270	341	416	506	407	658	233	277	102	212
85	267	468	483	518	613	222	232	96	159	354	469	388	134	392	142	311	500	282	614	176	627	244	195	268	364	243	192	87	140	155	495	261	356	529	242	159	695	407	379	159	389	421	432	511	563	181	282	71	268
86	284	434	464	487	528	235	324	112	130	284	451	397	233	297	133	365	420	360	548	224	545	164	192	315	383	376	260	48	151	305	345	265	362	503	381	133	663	343	393	201	259	420	363	493	674	188	273	71	205
87	312	424	473	596	653	332	282	103	55	424	425	387	304	224	140	303	363	437	504	191	612	165	165	222	446	345	212	147	168	116	439	310	291	538	378	185	614	328	314	242	316	411	456	507	612	223	292	81	120
88	384	489	485	466	607	311	278	96	166	385	536	492	223	240	223	390	422	358	394	257	560	227	280	267	402	286	163	142	188	190	471	287	425	594	265	221	693	318	378	254	220	434	472	638	644	252	224	147	224
89	370	467	440	570	721	283	266	191	191	374	323	388	188	178	123	361	481	445	429	209	638	119	310	205	360	279	251	153	145	270	437	371	330	664	273	108	634	397	340	209	330	427	400	561	640	144	266	125	239
90	238	351	374	496	611	352	357	103	179	458	494	497	240	315	155	327	329	297	486	230	570	131	261	248	340	303	205	200	160	296	359	325	266	633	372	146	580	371	221	250	341	320	493	468	548	320	297	92	101
91	327	333	458	506	591	288	200	117	111	301	378	478	195	338	139	281	441	362	490	138	705	200	274	167	427	307	256	74	115	299	486	229	306	678	354	122	593	230	373	196	340	370	412	649	661	234	317	152	95
92	288	447	581	682	596	331	310	60	121	394	402	434	171	259	111	305	406	456	410	187	574	161	270	146	367	341	283	181	138	242	490	378	333	479	324	111	653	335	379	130	310	460	521	572	783	387	329	95	207
93	253	440	485	586	664	214	211	69	197	427	602	481	304	273	45	326	391	468	453	179	544	116	165	198	333	314	206	157	198	162	596	310	370	673	340	176	570	375	364	209	277	372	435	475	630	296	253	103	183
94	270	353	567	505	677	276	321	162	124	333	449	405	345	223	97	384	316	499	471	172	584	107	343	192	276	259	218	150	82	261	431	311	376	543	360	140	613	329	309	192	315	421	438	490	664	353	215	164	190
95	412	488	433	668	701	387	155	165	191	244	464	538	213	309	61	318	436	494	451	183	534	15	298	289	512	320	261	166	222	279	423	230	449	492	280	104	604	352	432	175	388	312	473	465	631	223	210	63	232
96	325	474	601	542	589	263	264	65	208	343	441	348	177	233	140	385	437	416	491	195	580	173	203	245	373	231	234	137	101	178	479	270	387	606	393	200	699	326	324	280	225	467	408	516	714	275	189	118	220
97	249	383	451	511	534	270	269	139	195	396	559	305	210	161	110	353	418	401	433	165	691	129	213	211	440	277	213	139	134	232	486	249	215	567	272	213	600	267	309	204	307	457	442	459	678	242	217	103	178
98	352	489	484	537	661	237	266	65	216	431	383	478	320	236	151	423	472	420	435	199	576	211	416	259	309	303	194	75	141	267	420	335	288	484	298	90	550	258	322	258	375	430	452	600	694	233	291	98	121
99	264	414	488	505	549	301	277	125	175	357	551	355	242	346	102	425	397	419	538	198	598	153	308	259	349	326	157	81	161	174	405	327	379	588	431	103	673	305	415	279	426	382	423	500	661	169	169	43	276
100	297	410	505	448	600	218	149	115	164	388	511	390	315	281	200	397	383	501	373	164	593	143	289	229	299	278	314	171	40	209	410	344	316	527	351	191	665	326	348	202	319	300	466	510	759	302	246	62	200
101	201	380	535	536	617	251	230	93	235	330	491	454	312	296	90	364	404	481	492	201	617	201	331	266	368	276	195	82	94	267	434	357	300	623	317	68	600	299	286	232	247	416	428	635	588	208	281	117	242
102	338	478	435	493	579	301	288	33	182	400	421	403	329	319	63	363	411	430	433	276	582	143	305	225	357	342	171	92	36	179	369	344	352	672	309	176	552	261	287	180	305	448	419	563	602	248	279	67	184
103	324	420	472	526	521	277	236	98	178	318	587	452	183	261	212	339	513	430	583	166	638	208	252	219	354	320	221	113	157	146	431	262	432	517	370	122	675	274	354	236	362	391	434	487	607	230	318	138	247
104	433	463	481	581	633	243	291	208	170	334	529	462	271	198	162	371	424	511	395	230	656	85	258	257	364	308	211	145	169	187	420	263	328	697	340	155	689	375	390	230	315	457	453	535	618	313	344	99	194
105	443	448	539	566	597	251	264	180	174	409	459	385	284	261	123	366	444	479	423	251	720	146	234	177	351	209	166	175	71	239	477	303	362	468	379	209	635	288	276	143	358	342	367	498	531	275	217	106	222
106	470	434	497	525	606	324	266	140	170	399	507	458	283	353	305	334	483	485	489	180	700	91	352	246	329	304	215	129	133	201	535	434	355	616	329	82	720	310	304	193	188	397	391	474	594	214	191	98	226
107	489	372	432	512	604	423	290	133	132	293	401	411	326	355	175	378	461	468	530	149	641	172	304	212	329	306	253	111	136	112	413	294	459	559	329	248	603	253	373	220	301	498	415	505	560	229	257	110	211
108	431	513	552	475	501	298	375	-2	207	390	471	586	230	255	133	393	434	406	431	236	731	136	360	202	203	232	221	138	180	293	491	331	461	567	371	145	673	270	243	198	278	401	507	628	611	340	210	106	142
109	501	361	504	496	570	299	268	65	183	294	465	565	362	350	155	456	431	451	366	95	730	156	256	200	281	213	237	210	150	229	409	442	390	643	408	166	578	286	295	185	268	438	421	513	541	258	237	15	182
110	501	399	507	545	546	352	187	141	172	302	491	415	211	350	51	380	392	440	409	228	720	109	300	205	286	329	256	284	88	313	428	391	426	534	552	226	691	337	243	243	272	480	461	510	686	333	189	159	201
111	557	440	417	591	708	228	241	103	250	401	481	375	218	259	173	566	471	447	470	228	829	175	285	314	304	345	225	297	166	184	340	404	510	539	642	114	689	267	363	221	314	456	401	523	576	250	254	54	139
112	542	363	334	509	696	347	266	74	229	309	463	487	312	325	234	695	421	383	373	141	968	110	335	218	377	336	181	151	117	246	425	451	495	521	834	160	613	421	312	239	359	382	395	535	681	279	198	99	180
113	559	488	374	578	593	323	254	56	205	303	498	553	251	348	120	641	410	476	500	324	1118	104	291	213	360	290	188	454	85	367	418	496	442	589	954	168	635	333	399	168	342	491	493	525	662	336	198	49	144
114	467	507	415	430	749	397	348	-13	264	321	542	522	425	313	211	691	472	531	366	215	1194	66	255	204	263	206	188	483	168	190	443	435	523	585	887	169	697	242	424	230	310	451	454	455	773	307	278	105	104
115	509	427	451	610	673	363	273	48	296	262	462	515	257	280	117	673	413	516	536	266	1089	78	245	202	299	271	294	470	192	215	523	508	429	562	905	137	584	265	335	215	284	530	404	498	657	275	172	88	167
116	430	392	403	663	607	381	142	43	246	355	402	406	307	314	200	652	509	360	443	329	1216	40	255	176	278	268	234	478	204	217	419	418	507	506	965	267	710	224	291	196	295	472	394	514	728	273	279	104	137
117	645	371	557	544	572	355	264	88	230	447	493	496	256	251	172	619	378	415	455	113	1195	124	325	253	272	304	264	129	138	224	481	382	523	577	946	234	621	324	314	99	305	407	349	458	631	318	173	140	182
118	493	534	542	516	685	440	240	125	327	366	462	476	284	299	135	547	381	412	418	178	1039	185	321	204	251	255	173	516	117	229	454	458	527	641	896	118	677	449	324	218	273	465	463	590	669	282	244	112	61
119	449	288	393	503	609	478	223	30	348	428	355	622	300	270	111	552	456	418	480	258	1163	154	313	247	205	244	143	107	119	230	521	497	516	733	744	149	545	268	373	161	316	313	444	454	578	326	288	82	248
120	551	374	451	556	573	361	218	127	239	384	474	540	358	363	173	567	417	471	449	129	1103	96	225	269	351	265	189	457	115	230	427	402	441	565	846	194	689	337	355	272	249	453	461	518	704	261	228	142	134
121	434	394	450	550	667	385	252	52	294	381	435	824	290	423	144	591	548	553	525	307	1114	201	323	266	284	292	299	516	169	173	467	398	535	543	794	130	761	372	234	276	333	529	464	482	664	233	149	122	120
122	473	365	395	554	639	305	239	129	233	385	535	656	286	454	208	632	445	454	405	170	1068	138	259	198	264	372	233	494	164	199	553	408	559	642	803	184	665	335	385	158	339	465	411	485	602	357	324	46	157
123	456	320	497	550	580	472	234	103	307	500	494	513	255	348	88	599	445	404	413	290	1081	146	227	201	254	287	246	220	127	159	402	496	538	587	890	215	656	234	374	206	260	418	442	515	576	316	246	76	172
124	500	437	420	542	726	333	205	107	229	454	480	467	194	369	133	525	405	420	422	193	975	129	225	191	206	233	267	160	140	240	509	482	605	647	828	167	707	315	345	229	372	391	299	625	597	356	293	116	279
125	405	364	338	490	701	450	226	204	287	262	490	709	213	504	234	500	447	561	449	183	971	139	271	223	406	291	311	467	200	198	490	363	502	613	791	260	686	247	344	93	333	484	486	499	549	340	265	145	168
126	367	442	483	529	571	387	195	82	291	334	508	619	185	377	139	540	432	477	413	299	1101	236	172	268	313	333	294	508	183	250	486	427	520	508	633	212	695	405	461	107	254	371	554	491	679	346	313	95	142
127	480	390	449	518	612	393	267	83	291	449	494	674	319	413	179	506	479	423	362	241	878	127	206	225	285	346	238	481	140	198	565	414	549	588	728	205	734	209	345	238	325	423	255	511	560	377	188	100	157
128	349	594	502	661	594	332	244	161	332	490	409	917	355	365	171	464	403	532	437	200	956	183	268	276	237	296	196	551	182	259	512	429	445	561	810	173	561	214	466	185	244	426	469	566	572	289	224	50	136
129	433	486	352	607	629	429	290	134	333	264	466	750	212	382	129	567	414	551	547	234	863	133	337	177	351	223	249	187	122	318	520	440	455	528	593	290	600	328	482	214	397	549	512	523	607	432	265	188	155
130	432	416	482	483	659	398	268	181	311	387	509	886	238	376	107	515	501	515	471	241	867	187	198	195	378	292	139	501	153	233	505	355	601	774	673	172	599	228	452	163	220	420	459	537	615	348	208	126	217
131	446	397	440	601	661	410	266	150	336	527	523	881	319	375	99	489	522	548	492	301	863	104	265	272	318	342	219	105	121	192	617	509	544	782	634	243	612	216	395	282	240	480	494	587	674	268	336	99	235
132	369	423	307	547	556	361	241	120	365	304	363	920	270	391	130	459	477	556	433	160	794	149	252	232	351	393	267	73	119	203	565	469	565	689	691	268	818	225	477	354	365	398	385	563	749	261	192	105	218
133	444	430	395	559	601	338	242	206	356	383	401	790	218	363	158	513	479	507	463	165	923	181	326	188	356	322	152	172	215	208	549	456	484	951	567	299	617	233	405	238	438	487	473	476	667	321	291	142	179
134	451	529	362	414	842	320	306	84	255	287	468	664	330	441	202	472	505	616	436	122	955	117	244	375	287	288	223	348	105	283	564	495	428	1092	689	218	554	246	471	206	275	436	430	428	634	486	290	132	147
135	424	331	424	486	646	375	228	84	303	387	479	737	303	255	166	473	474	743	430	253	863	195	240	257	289	301	176	456	135	219	551	390	465	1017	555	225	587	256	409	220	181	483	383	505	633	416	238	44	190
136	462	510	457	614	595	404	190	114	325	402	618	680	192	461	258	435	493	661	587	223	884	208	317	201	319	229	241	567	116	219	515	400	530	1118	789	260	693	190	489	147	307	386	483	498	746	246	301	134	174
137	442	531	450	450	608	253	207	137	276	416	546	899	282	487	174	505	450	511	437	201	895	230	322	163	386	341	272	411	177	195	470	320	541	1080	666	276	653	304	406	270	288	397	391	453	597	281	167	147	201
138	372	512	527	559	643	349	345	94	373	328	443	846	260	464	142	521	558	735	514	279	874	218	351	133	336	242	159	468	214	239	506	349	543	983	583	255	643	281	425	133	416	417	447	557	604	296	222	87	196
139	426	451	487	557	525	461	175	212	300	364	371	963	312	407	99	485	425	685	518	211	892	103	221	222	312	441	231	385	199	147	523	337	492	854	597	136	680	291	287	261	344	435	412	591	702	353	276	129	229
140	478	364	330	508	658	409	396	65	312	376	437	929	276	416	207	471	543	573	475	192	981	139	266	154	268	537	251	468	203	208	491	390	559	1020	654	254	650	280	413	202	300	426	399	544	668	274	163	66	253
141	455	428	447	536	576	371	296	149	226	407	495	784	186	458	146	525	468	588	512	307	974	199	185	194	277	450	182	380	167	211	501	383	500	962	658	324	682	261	419	201	359	488	452	432	655	364	235	183	203
142	445	456	328	651	573	417	207	170	281	482	436	661	204	366	184	476	576	739	449	183	975	165	239	161	294	488	157	511	219	269	516	307	548	965	557	255	726	285	357	143	257	383	445	477	670	328	148	133	209
143	432	431	477	484	721	423	285	74	299	437	431	818	273	344	166	439	595	592	434	258	872	152	283	214	350	504	152	386	229	237	391	334	601	956	588	242	739	328	349	253	275	527	488	627	698	317	167	161	228
144	411	389	465	480	602	312	160	93	379	474	517	673	356	488	166	562	507	580	447	238	916	157	281	204	253	464	227	332	176	304	430	352	481	921	708	303	768	271	409	147	296	387	373	418	545	283	191	97	220
145	500	445	430	562	665	322	193	45	315	544	517	667	281	404	143	446	546	578	410	271	1086	129	309	173	324	556	210	408	213	335	356	397	480	967	605	219	879	306	394	213	283	393	421	604	668	379	272	51	157
146	402	344	488	429	630	276	183	149	344	307	449	821	186	420	108	444	483	513	661	182	993	162	310	198	330	401	302	391	171	241	384	362	493	902	560	241	909	335	415	243	297	419	479	421	692	278	199	103	195
147	368	385	436	548	607	361	209	188	319	355	451	872	252	497	134	504	552	584	467	249	1025	119	278	101	409	510	170	452	214	214	498	319	510	810	535	239	788	243	400	124	355	413	542	496	733	296	273	184	131
148	435	360	449	592	713	345	238	94	195	416	425	757	241	379	111	510	506	488	485	295	1111	150	271	134	350	476	250	320	168	216	472	370	512	865	600	342	926	294	460	179	366	332	358	525	636	416	230	186	135
149	525	458	432	491	755	368	236	143	286	406	508	689	280	457	135	386	588	621	496	337	1004	138	260	187	365	526	188	363	168	220	505	455	472	898	614	231	722	162	478	159	264	363	453	548	678	293	263	123	287
150	417	406	338	521	713	330	266	146	263	350	441	615	330	393	45	402	516	528	485	201	937	139	245	102	246	507	165	408	101	217	474	344	444	823	497	253	981	255	437	228	262	514	476	493	713	320	233	157	237
151	515	355	532	509	779	312	240	180	186	361	617	621	304	336	258	418	518	725	460	256	949	109	223	148	349	466	166	370	162	309	487	370	544	775	511	321	841	243	372	156	337	547	459	617	733	338	276	206	192
152	380	435	463	579	618	228	281	222	442	389	656	670	261	437	188	467	602	649	550	286	955	192	271	168	243	523	151	319	129	245	437	347	412	747	616	235	738	231	303	210	377	436	481	516	642	273	299	142	136
153	337	537	426	522	649	296	181	110	320	508	412	567	290	390	143	576	531	690	540	333	1038	185	255	254	346	450	241	380	140	207	529	370	478	758	481	244	792	274	406	257	407	505	413	603	743	384	264	145	225
154	449	369	398	525	565	345	203	21	251	426	514	680	358	361	131	519	535	797	598	246	1017	110	266	178	347	536	180	276	106	211	491	421	516	803	585	316	939	237	435	170	268	457	436	629	682	364	316	71	265
155	512	413	424	474	683	351	306	25	247	458	488	567	335	298	104	394	592	914	509	140	908	140	267	160	288	457	252	223	146	238	445	412	473	826	490	202	709	333	376	237	261	454	413	524	672	316	141	139	203
156	417	434	409	490	694	243	253	164	302	417	524	571	298	453	69	354	565	863	599	228	1005	147	223	206	290	405	211	80	170	242	478	298	471	807	567	278	818	308	363	212	240	448	481	521	647	274	240	94	284
157	547	402	501	565	688	304	274	152	311	392	420	672	357	333	73	503	672	825	527	207	1003	118	327	109	422	489	214	287	179	230	412	303	510	680	450	162	822	294	356	131	328	427	401	566	713	218	335	201	148
158	435	341	399	529	760	337	216	100	360	369	469	601	207	435	240	442	535	842	530	251	948	163	276	182	346	452	245	383	107	288	514	420	473	707	441	241	755	252	421	236	325	484	531	529	748	307	172	18	215
159	427	389	358	418	651	347	318	189	320	427	577	480	292	281	132	479	652	867	556	217	1042	136	314	153	298	500	195	270	160	311	528	356	402	718	511	308	760	295	354	161	281	428	451	469	669	241	232	138	330
160	388	499	349	484	621	302	298	66	299	407	591	644	437	426	93	462	559	907	488	230	1005	102	225	38	237	605	131	230	142	475	503	272	508	689	556	227	800	321	466	237	351	355	356	482	762	295	346	81	202
161	444	336	415	495	554	425	254	78	276	465	510	709	483	349	34	387	599	712	580	232	1086	163	329	122	353	563	316	285	114	540	519	352	413	717	533	264	768	377	432	232	227	459	463	496	673	420	288	66	251
162	422	465	377	614	721	257	372	192	323	510	552	561	577	373	124	484	669	812	502	219	1148	89	364	153	290	529	187	172	166	563	567	269	522	645	502	254	697	301	408	247	387	403	497	497	581	312	235	60	204
163	432	495	367	507	628	290	390	118	281	432	589	553	748	386	132	378	669	698	534	187	1075	145	301	129	295	586	266	248	158	464	393	353	419	708	426	262	737	311	485	212	299	511	340	667	677	318	145	143	149
164	437	458	414	628	622	329	203	105	294	401	542	566	677	363	230	402	607	680	421	253	1046	145	304	171	320	526	189	270	137	591	428	329	471	766	610	217	675	233	480	226	265	392	556	620	607	298	244	104	220
165	349	398	471	537	756	295	240	121	350	552	456	608	826	252	110	544	556	886	541	238	886	120	223	169	268	488	167	253	100	455	451	374	466	750	498	209	775	309	367	198	296	570	363	529	647	294	223	163	151
166	332	301	500	493	574	344	173	113	327	391	626	527	662	282	189	452	459	730	457	253	930	50	341	210	304	583	263	285	154	589	564	340	500	674	544	261	713	212	439	217	385	536	428	456	697	345	228	79	98
167	453	491	417	617	616	406	184	113	382	377	637	669	691	456	188	472	488	695	568	177	965	78	305	118	277	518	298	248	81	527	473	303	465	662	450	163	535	292	467	218	345	471	382	492	702	272	334	143	220
168	495	394	470	566	425	442	294	168	326	303	572	500	616	344	220	428	468	674	417	236	972	147	242	109	284	479	227	110	39	438	405	367	486	656	431	183	768	262	518	227	287	517	348	523	699	333	222	115	194
169	486	414	521	526	584	321	325	223	399	379	562	523	819	355	61	419	518	662	466	170	898	167	255	179	373	473	168	198	171	484	347	320	364	627	448	173	641	287	439	288	349	411	396	495	649	247	245	148	108
170	328	358	445	639	651	376	286	118	350	427	617	469	701	308	155	437	599	685	520	266	1044	119	257	213	343	578	232	257	51	450	568	336	494	641	400	242	649	391	499	153	347	434	366	549	724	351	205	122	237
171	473	434	364	562	729	370	333	85	348	395	550	600	757	320	155	319	549	713	431	264	917	124	264	154	321	536	273	291	132	559	341	312	490	738	427	222	732	283	498	212	257	458	431	630	718	313	204	135	217
172	316	376	457	509	594	283	231	208	295	378	506	598	711	283	167	477	450	765	588	196	982	195	294	133	319	621	240	275	111	404	386	271	453	795	404	157	743	279	428	178	337	420	373	543	692	293	258	109	199
173	408	423	443	603	646	272	280	133	386	379	672	510	614	399	227	524	482	612	574	145	884	196	339	126	341	650	201	186	161	410	362	302	417	789	466	74	663	198	424	211	294	466	395	464	649	315	257	131	157
174	465	371	388	569	522	296	222	137	364	398	574	473	759	331	182	409	484	794	481	160	923	131	375	150	347	519	201	232	130	405	462	323	439	739	397	181	702	291	400	199	284	356	446	550	608	332	211	198	91
175	362	462	375	524	653	287	162	155	378	361	544	436	640	361	113	458	585	645	534	131	913	130	353	91	363	519	208	260	176	417	500	278	378	816	455	189	762	213	411	170	375	424	452	534	688	341	194	97	259
176	432	437	562	577	736	322	259	62	322	332	562	463	581	436	274	390	410	773	641	247	918	165	282	137	307	464	155	306	154	473	401	360	485	889	397	229	622	296	474	270	387	415	373	617	662	235	260	94	218
177	373	449	434	502	612	336	247	113	325	309	484	454	604	344	128	281	575	834	618	125	1072	97	135	124	341	663	268	345	175	442	433	326	488	1056	370	176	699	325	401	278	204	456	462	496	700	189	287	60	138
178	381	387	399	490	760	278	301	76	356	461	578	512	626	373	133	372	501	629	509	204	996	154	253	96	332	554	264	181	127	358	440	350	390	953	409	242	610	300	404	269	265	498	297	592	633	314	237	39	245
179	288	391	404	622	590	319	153	129	325	428	537	608	553	345	166	428	474	784	528	171	959	97	327	89	388	557	238	325	135	306	410	186	514	1040	459	179	676	252	409	153	386	431	369	472	638	322	285	206	227
180	408	408	364	523	649	306	170	96	400	356	507	555	444	261	170	374	546	727	593	174	914	60	176	-7	389	668	206	212	122	289	355	228	485	945	319	233	685	345	457	139	319	484	377	517	555	320	243	53	192
181	383	380	468	602	656	323	278	114	325	519	582	606	577	345	196	350	446	632	541	215	982	44	222	103	347	567	140	370	160	266	418	271	370	981	447	201	577	323	442	212	313	392	485	519	778	273	227	82	179
182	474	351	357	607	621	296	234	163	415	446	460	515	671	328	108	302	540	683	593	211	1125	245	230	40	357	553	132	501	160	327	462	311	354	996	307	163	709	201	401	115	345	540	368	539	581	365	283	98	196
183	390	487	629	576	758	295	170	115	290	290	548	552	706	284	159	407	404	580	693	192	1130	160	283	118	292	578	270	455	63	265	457	261	313	929	393	162	465	287	575	132	269	436	438	532	670	339	300	139	135
184	399	513	474	551	550	325	177	154	332	427	541	520	756	350	128	360	416	729	696	162	983	115	274	140	337	578	233	155	149	326	388	259	418	993	291	132	620	297	498	211	392	435	374	457	734	329	345	192	189
185	374	525	449	534	705	247	268	160	378	408	542	805	657	417	133	449	543	707	628	128	1122	104	260	152	359	517	204	465	150	282	316	364	403	875	381	104	605	279	373	149	351	435	366	500	802	279	191	113	187
186	398	410	393	622	527	398	190	201	413	394	564	574	590	409	142	343	477	648	625	262	1122	104	330	86	295	606	175	334	219	377	394	290	413	998	364	201	633	303	460	188	343	391	364	438	674	277	175	158	70
187	279	530	404	494	644	248	315	153	299	379	555	618	613	339	125	314	414	643	551	169	1135	172	184	126	368	547	167	363	77	303	525	305	355	763	360	106	677	253	377	161	316	367	407	454	769	226	341	136	191
188	244	484	436	521	770	281	176	115	253	437	465	450	594	313	126	371	435	527	675	168	1131	159	315	158	305	533	111	363	180	418	443	240	400	823	396	150	669	289	475	240	197	433	558	581	745	91	268	101	201
189	443	543	456	486	693	228	202	63	341	376	555	586	701	326	91	403	471	592	620	260	1153	170	290	122	264	627	195	399	107	411	366	232	472	831	373	52	624	295	361	251	303	361	394	549	704	284	266	177	200
190	312	432	414	527	748	300	315	110	326	377	493	505	656	319	183	368	597	664	698	188	1126	118	277	118	333	512	112	391	172	272	387	318	420	692	295	247	663	282	412	201	268	328	368	538	710	307	165	167	79
191	422	422	393	553	605	203	137	98	333	392	586	533	597	393	76	259	529	600	615	209	1062	36	190	120	363	494	214	448	120	352	497	289	491	741	410	211	634	362	359	167	322	411	517	493	632	285	219	75	271
192	347	427	440	511	724	368	251	198	356	325	514	475	567	399	179	293	525	586	566	247	1179	111	337	219	355	489	185	368	154	274	526	286	397	835	328	198	615	290	422	205	410	539	417	577	771	263	252	17	307
193	362	435	453	589	697	341	214	113	326	409	515	586	645	284	198	295	542	663	539	204	1106	204	316	97	379	506	177	437	142	297	401	336	414	774	349	123	705	209	354	257	286	440	581	618	644	267	296	155	196
194	341	469	414	524	607	254	166	178	274	302	496	458	579	415	223	274	554	641	641	229	1059	-5	209	44	301	493	224	621	106	214	387	257	389	764	325	184	797	356	378	274	245	487	388	561	661	350	283	215	155
195	366	494	387	522	768	231	245	57	390	415	505	488	567	320	94	330	577	641	594	281	1143	226	369	129	334	527	268	518	211	281	495	357	439	791	388	125	634	254	405	195	273	461	471	531	639	251	281	181	117
196	323	424	477	560	841	310	237	123	303	418	565	571	744	350	252	281	541	439	652	233	1097	-46	334	80	381	457	173	422	130	251	457	161	402	791	330	254	634	355	399	306	409	457	503	580	660	272	309	148	247
197	349	420	421	574	536	372	225	168	255	425	560	424	655	235	67	289	559	727	573	151	1194	135	189	111	296	608	292	579	179	344	407	298	411	773	287	236	648	315	381	187	264	347	419	544	740	230	210	158	206
198	286	449	430	584	601	248	251	111	318	311	378	419	437	292	93	313	607	634	603	193	1152	78	242	21	358	451	161	547	136	311	379	305	435	714	305	176	665	280	461	119	293	477	423	531	762	239	234	127	182
199	421	446	491	584	638	319	265	201	387	426	534	492	646	346	231	343	609	618	536	119	1180	245	306	131	293	656	157	338	65	247	411	237	398	836	201	174	644	360	417	148	339	503	488	615	690	294	214	148	192
200	239	501	388	606	632	352	214	83	376	403	517	523	647	371	99	358	540	673	523	175	1125	122	192	100	310	463	235	483	185	253	478	332	301	755	342	135	639	272	449	235	349	348	504	599	794	316	178	65	203
201	391	302	493	544	594	328	185	130	273	367	421	466	644	348	78	346	483	460	637	262	1103	188	264	111	297	542	255	578	109	249	451	367	428	647	347	75	668	270	477	255	354	374	370	492	702	287	243	69	214
202	431	500	401	722	615	264	140	160	387	369	558	538	609	342	120	380	486	590	589	252	1034	158	294	111	383	543	174	325	77	269	468	257	429	737	451	120	654	237	335	163	254	412	345	436	665	308	131	139	157
203	332	461	458	527	667	432	223	189	299	329	513	439	592	254	107	328	445	487	652	109	946	114	333	15	337	448	230	544	102	222	450	264	362	810	462	98	643	302	425	173	241	395	420	568	647	269	222	242	201
204	394	379	479	575	612	345	321	128	271	424	569	473	396	209	121	298	523	571	515	274	1068	79	187	79	469	424	171	388	126	202	489	399	398	687	420	115	661	316	439	169	296	511	500	560	714	245	209	74	225
205	303	385	505	483	680	217	223	83	243	466	471	347	480	303	119	428	483	643	536	248	969	138	236	24	329	489	339	427	149	351	436	300	388	731	310	137	692	250	344	239	354	404	466	547	622	264	317	138	216
206	403	404	528	557	645	317	294	198	281	358	388	583	537	285	142	344	470	450	449	120	979	164	207	122	425	505	197	485	122	303	487	383	297	734	430	213	560	236	375	269	342	470	347	420	605	217	222	129	176
207	296	337	459	532	649	356	293	169	253	481	532	456	419	263	161	347	560	531	439	262	1048	165	235	65	276	385	222	515	103	242	451	269	408	677	399	246	649	360	422	331	360	495	504	545	704	269	253	131	158
208	338	447	443	494	625	306	277	148	175	441	558	505	438	297	105	286	495	454	572	181	897	161	316	86	433	447	249	369	166	237	422	299	326	552	290	212	655	306	446	147	303	441	515	506	718	236	230	102	223
209	329	488	405	573	694	321	247	120	265	504	432	441	425	273	202	300	495	484	542	227	900	189	281	72	381	347	265	436	118	255	391	325	305	564	340	168	613	238	365	273	271	431	476	575	685	269	203	87	151
210	260	431	511	390	618	422	298	76	215	379	467	456	425	271	194	349	402	473	570	152	930	169	320	-2	394	324	150	418	116	183	429	231	374	713	353	12	630	334	484	109	312	492	488	635	675	227	274	64	148
211	316	357	347	591	799	282	299	89	202	398	351	409	418	381	143	346	391	386	548	196	864	86	208	107	329	490	206	283	135	280	399	238	361	576	312	118	679	262	314	228	279	401	456	674	610	240	169	61	245
212	234	445	420	524	658	369	193	124	107	374	427	490	416	197	249	311	479	464	414	196	972	134	278	86	310	336	206	322	108	343	591	230	320	600	465	192	695	222	391	186	276	445	398	579	757	321	227	90	138
213	352	439	429	383	545	423	249	189	252	390	475	498	435	285	159	265	421	419	500	173	869	115	278	69	318	360	244	433	71	283	489	334	326	655	359	205	621	261	312	262	328	426	450	603	806	246	278	128	141
214	208	414	528	619	662	374	199	81	180	317	403	566	610	125	91	267	357	409	546	196	839	60	297	97	368	354	226	452	62	206	423	335	315	667	320	157	574	320	350	161	239	487	446	598	766	343	231	91	96
215	300	372	430	595	547	362	361	123	181	434	487	383	504	268	107	370	395	483	516	159	855	117	244	48	321	271	161	350	75	260	423	316	362	683	340	159	541	238	431	213	290	556	463	563	792	274	248	121	239
216	322	408	532	485	752	380	249	140	216	316	469	391	440	142	202	226	488	500	383	211	919	112	317	30	312	397	164	395	85	256	315	259	330	573	326	159	568	259	473	194	391	396	416	529	643	390	320	124	182
217	360	464	352	585	591	313	243	113	214	366	407	562	457	226	70	349	390	434	490	188	875	154	203	105	381	276	191	290	70	297	461	220	372	596	379	224	570	301	296	257	361	339	489	448	617	277	247	71	217
218	246	463	439	565	546	210	288	133	90	446	548	360	422	157	134	306	368	529	482	186	877	94	276	75	366	331	288	292	99	239	407	291	413	668	280	173	635	402	477	221	402	539	421	524	700	262	255	88	219
219	343	416	516	577	633	407	172	166	152	452	286	433	481	170	154	357	378	475	469	245	867	65	246	49	332	398	205	388	101	188	426	296	291	705	329	209	512	358	350	203	352	449	509	536	793	288	293	74	170
220	289	370	416	592	721	340	295	186	184	379	394	441	370	229	148	311	399	399	603	226	821	135	299	8	374	303	199	298	85	267	409	244	383	579	408	177	686	288	407	212	316	454	425	448	638	221	288	63	298
221	287	367	492	606	710	170	186	17	211	399	404	411	405	152	69	321	451	425	445	239	831	151	239	126	358	307	182	223	81	364	425	331	399	601	361	160	665	354	346	198	311	475	397	481	610	281	236	79	158
222	331	397	499	536	681	265	177	115	237	439	516	370	544	93	142	356	485	482	463	261	879	57	274	103	312	394	257	312	58	190	462	360	316	608	396	166	516	298	366	230	282	550	444	553	606	254	301	54	238
223	258	476	597	517	672	289	194	117	214	380	390	297	516	121	182	261	407	365	553	129	735	155	199	113	302	253	166	341	91	171	406	342	456	616	448	102	686	248	381	259	299	470	405	487	603	221	305	140	193
224	309	508	569	590	667	278	302	176	208	354	357	364	443	140	155	283	427	430	464	201	812	149	284	79	331	356	202	186	94	281	488	370	324	695	445	120	600	381	372	185	334	353	337	546	688	275	222	149	156
225	352	444	495	502	588	252	203	89	209	365	376	501	422	78	144	287	438	422	511	205	813	95	224	69	378	352	197	176	82	130	439	419	261	590	364	147	608	353	340	219	365	456	353	477	634	224	220	0	127
226	230	359	551	528	705	258	296	33	243	315	341	414	421	186	168	316	449	378	498	286	776	199	239	97	430	263	282	240	127	284	434	331	210	568	380	180	629	295	337	209	376	455	485	478	781	302	305	59	162
227	308	393	361	475	562	240	259	80	164	448	488	395	369	203	136	359	377	472	405	141	790	158	270	209	423	248	192	304	51	255	488	378	370	598	385	170	653	402	331	268	245	348	388	486	647	189	185	131	203
228	330	399	427	567	550	249	307	61	313	325	356	389	375	154	115	357	504	483	389	316	827	157	204	103	462	178	207	354	81	258	451	338	342	615	409	148	669	334	419	177	361	526	455	495	687	282	229	49	153
229	360	472	564	532	594	289	238	130	186	301	546	381	441	118	144	331	503	404	405	275	680	152	250	74	331	239	309	319	67	256	447	238	347	588	336	315	493	394	333	103	358	411	448	609	718	178	281	138	167
230	294	511	569	452	693	307	266	71	240	506	364	297	407	202	154	321	433	336	365	180	769	148	213	132	284	158	190	225	141	265	518	184	327	605	332	123	650	273	369	223	301	347	404	439	607	247	217	160	237
231	431	506	545	677	686	310	148	224	193	332	532	315	438	159	208	380	456	478	400	130	724	154	161	67	351	285	184	239	103	156	473	396	364	580	475	148	628	289	371	165	330	513	359	617	722	216	273	168	149
232	315	475	332	570	612	283	275	106	155	490	430	382	348	155	129	318	483	358	402	299	635	78	226	91	292	309	265	306	173	201	403	313	343	565	314	170	710	331	262	184	308	500	460	523	680	199	235	103	213
233	302	435	428	486	627	298	258	65	125	217	415	345	447	159	106	352	424	304	399	218	662	109	167	59	458	280	199	127	94	216	376	422	227	576	420	101	663	270	364	188	307	428	418	478	749	203	276	69	146
234	390	449	488	476	738	165	218	66	166	482	487	458	374	136	182	347	451	394	396	226	667	137	131	94	327	220	137	164	36	229	438	276	353	636	386	121	593	324	360	246	304	600	421	455	730	237	353	119	86
235	289	408	465	603	720	333	279	157	124	387	538	404	482	106	89	369	422	560	440	212	628	164	61	55	442	184	157	174	71	200	461	327	268	612	374	133	673	269	321	257	259	479	340	435	678	283	343	30	214
236	338	441	531	639	714	337	238	133	182	433	445	457	391	52	159	328	507	428	515	207	747	166	96	87	249	374	304	292	135	223	384	349	332	631	280	172	569	294	401	246	391	477	508	579	649	200	241	129	168
237	382	531	490	486	749	292	272	29	221	365	500	292	384	124	122	298	550	348	497	270	583	158	123	111	303	215	256	148	80	215	514	263	241	636	466	146	663	256	257	176	389	493	467	539	756	253	245	110	176
238	262	407	430	507	621	284	207	151	244	399	508	405	333	158	172	294	429	366	451	290	638	156	123	76	387	252	225	206	103	237	437	327	391	558	372	45	619	312	351	163	254	402	414	615	604	236	295	54	204
239	366	401	497	553	557	352	148	123	228	354	443	356	389	130	147	234	411	427	492	334	594	222	62	94	451	310	206	278	134	200	467	376	388	644	403	242	634	350	450	251	303	419	432	528	669	256	332	118	239
240	282	497	385	546	731	242	218	110	138	374	493	342	373	77	50	265	397	495	539	195	558	202	271	123	297	235	209	178	123	230	451	320	366	666	421	147	556	319	316	214	257	415	425	581	608	337	215	117	124
241	144	521	472	608	647	299	127	153	148	383	383	454	362	85	89	337	405	453	375	209	747	327	340	122	300	254	181	177	171	264	448	317	317	600	244	225	658	215	335	225	359	438	417	447	712	262	180	75	236
242	324	493	513	567	687	254	236	44	163	207	584	501	375	140	151	363	443	441	370	179	631	184	246	41	251	259	85	208	54	174	528	309	365	575	376	122	576	287	328	174	367	398	459	450	633	219	280	119	205
243	258	447	468	633	636	241	302	118	151	449	574	363	382	108	131	336	404	388	456	267	596	155	263	103	343	287	143	98	-25	197	561	344	291	515	353	164	585	353	402	141	309	356	413	438	661	275	324	92	250
244	384	382	430	478	656	339	173	109	95	314	481	396	416	153	136	308	453	416	505	245	689	181	301	169	409	263	207	223	115	278	554	317	317	570	336	213	543	162	319	242	392	452	530	567	686	258	305	95	167
245	314	477	458	614	645	265	263	104	120	369	521	404	370	165	234	347	402	351	435	272	577	124	255	71	360	244	220	228	68	221	470	271	320	769	336	163	631	266	359	226	428	485	472	502	596	175	299	110	193
246	322	374	385	650	757	264	323	78	169	344	476	447	381	93	194	278	475	296	430	251	612	151	306	131	360	340	218	208	84	241	586	266	424	585	420	175	567	372	315	195	281	410	474	510	652	292	245	53	171
247	252	384	378	524	643	274	264	64	138	298	441	391	347	157	106	338	440	383	418	231	637	132	418	97	310	270	193	220	177	213	476	331	280	593	362	144	631	335	322	121	309	446	543	551	658	285	230	112	155
248	199	497	481	534	638	251	231	115	234	409	455	400	411	111	146	365	387	436	511	139	640	149	134	98	282	322	211	77	69	244	497	240	343	565	434	140	676	325	364	191	371	432	334	474	556	203	226	92	162
249	223	434	410	528	539	236	303	109	165	422	442	316	351	114	144	363	476	457	385	239	585	194	244	84	314	221	215	209	120	188	425	361	389	563	346	121	635	220	326	133	348	412	409	647	481	292	233	122	250
250	342	404	435	569	663	341	291	139	168	369	430	187	392	184	121	236	430	370	489	244	580	97	236	140	272	236	204	122	97	227	544	361	355	460	347	183	546	228	297	166	332	349	488	523	763	248	297	187	140
251	276	478	363	490	573	242	229	80	131	399	452	481	284	411	164	281	356	342	442	206	607	89	313	104	302	197	212	210	133	169	385	323	391	571	322	159	781	339	277	207	321	451	477	476	620	281	168	68	198
252	302	416	520	418	795	303	220	107	215	388	427	441	395	260	149	347	448	399	311	188	509	146	213	107	336	291	207	141	86	249	462	242	306	583	461	129	740	367	379	180	361	334	483	583	714	313	271	50	179
253	301	456	499	510	659	269	253	112	150	357	473	469	395	167	177	258	345	306	436	273	674	148	321	90	325	279	175	128	85	141	488	399	357	671	305	191	530	233	165	252	343	356	490	507	660	215	224	231	171
254	332	421	402	591	717	276	315	203	135	359	385	375	392	291	186	402	406	374	407	143	733	134	201	1	334	402	215	214	27	199	495	326	385	530	407	179	516	321	380	178	239	476	394	564	593	216	209	118	151
255	182	342	497	602	599	330	282	158	143	467	531	370	379	410	153	330	497	465	428	244	564	86	176	109	343	303	153	138	50	186	530	307	293	629	318	187	648	335	380	201	322	455	429	455	759	243	242	90	116
256	216	429	422	642	614	297	282	33	193	283	449	505	404	251	168	303	439	320	375	160	723	182	222	19	324	293	238	155	101	192	521	320	254	632	415	143	681	289	431	232	245	468	353	484	687	382	232	122	111
257	300	475	414	582	655	235	151	130	108	384	409	337	263	352	191	315	419	374	385	224	633	179	261	217	313	320	313	140	124	129	487	317	341	535	381	177	676	300	292	200	291	565	432	528	677	242	280	53	167
258	264	454	406	419	649	258	206	223	175	377	275	351	343	278	162	268	417	395	434	164	632	178	313	183	298	264	260	161	118	187	481	256	324	690	408	143	619	319	246	218	361	522	406	490	729	291	277	109	152
259	163	441	511	561	711	293	203	28	184	396	449	363	441	449	241	282	314	330	298	208	658	126	186	176	420	236	251	126	137	218	472	356	266	657	337	112	589	269	327	229	205	481	554	481	548	212	240	136	163
260	274	421	457	574	602	158	212	102	154	376	504	488	257	390	137	250	359	468	502	226	725	159	270	194	298	224	271	163	133	164	479	242	287	562	407	223	640	265	375	226	284	463	324	412	750	266	223	95	117
261	280	346	405	616	562	223	174	159	254	404	324	453	378	244	87	214	387	356	345	212	556	216	271	214	270	226	294	166	96	214	463	351	345	639	337	193	611	325	303	179	314	473	375	465	693	276	198	106	271
262	289	447	438	573	649	287	263	92	275	293	566	427	354	336	148	298	444	376	359	304	647	88	317	197	430	232	270	138	141	184	502	271	360	613	414	112	576	309	333	89	375	389	507	604	607	412	228	107	72
263	272	409	493	559	640	182	299	69	133	360	472	418	453	325	123	353	354	389	391	204	643	146	325	254	405	308	170	137	74	205	599	289	335	553	402	155	622	339	324	128	403	388	368	455	659	192	234	88	58
264	181	438	359	527	703	303	253	89	171	387	355	349	316	240	182	403	426	375	472	225	567	164	369	229	316	362	223	198	71	256	452	277	355	590	406	221	626	254	326	252	413	488	479	457	651	337	247	130	166
265	220	459	493	547	681	340	250	92	121	381	490	449	413	321	124	267	430	302	443	150	626	109	264	224	396	289	143	192	119	151	514	364	332	560	401	135	574	222	294	210	404	367	467	486	739	307	321	167	75
266	253	487	432	659	583	320	338	121	192	414	471	459	326	220	184	314	454	370	351	189	653	112	294	193	394	223	277	138	112	192	407	193	301	522	273	166	671	403	337	263	289	438	465	473	719	177	307	102	168
267	337	359	531	549	653	267	245	130	101	392	395	349	390	313	221	258	469	428	452	244	510	193	250	191	310	314	212	117	105	241	350	356	314	592	358	108	641	358	394	266	347	434	429	544	765	237	279	140	92
268	206	416	429	624	647	272	151	80	74	348	584	378	408	341	210	307	506	361	397	237	507	102	382	201	360	231	193	78	31	155	486	280	333	506	369	145	630	403	361	260	400	491	392	464	663	312	333	151	46
269	268	430	473	566	657	320	258	169	148	415	600	422	331	244	108	323	422	525	361	313	613	186	347	200	287	316	225	150	-9	226	397	306	413	582	457	186	591	308	386	248	243	449	533	501	634	326	263	135	15
270	253	368	469	669	691	285	196	153	194	366	505	409	371	199	215	379	394	397	383	217	591	161	344	187	302	330	161	122	108	221	449	274	252	506	335	166	630	283	343	210	415	485	352	518	765	260	225	92	73
271	288	490	430	441	620	252	269	64	88	382	567	295	288	316	135	366	473	327	412	344	655	176	299	122	290	296	167	170	68	227	466	253	314	555	421	183	597	325	344	176	336	390	379	475	693	234	291	136	14
272	269	459	453	581	659	206	303	78	107	437	333	365	387	399	101	231	496	342	396	169	760	215	529	213	378	317	202	139	60	209	347	336	386	617	378	140	590	224	262	240	379	478	351	457	674	266	286	110	-2
273	387	470	470	604	675	348	369	62	199	550	245	486	242	331	151	314	344	299	332	207	784	53	339	170	247	266	94	126	82	225	469	410	302	522	404	112	647	317	312	189	269	368	431	590	669	252	279	113	7
274	305	352	579	563	714	311	265	61	36	388	301	195	343	290	145	273	574	406	454	266	831	146	483	194	338	279	243	101	140	239	394	287	275	517	340	74	565	284	354	243	393	382	449	566	731	307	296	110	27
275	250	410	429	496	663	231	255	68	125	492	325	349	304	271	179	330	543	268	381	242	828	80	389	190	331	214	220	89	120	272	517	300	349	493	336	173	623	343	360	273	253	501	455	393	620	259	284	106	39
276	297	433	515	469	659	256	188	127	117	409	311	381	353	410	188	245	419	394	398	200	833	80	433	239	237	164	164	107	129	220	439	297	333	589	389	241	671	277	384	235	340	462	465	434	751	251	240	170	27
277	290	338	508	564	699	265	197	101	172	315	278	563	275	414	92	358	348	503	473	281	935	112	422	214	290	149	191	188	71	198	482	270	303	626	322	198	545	284	409	147	337	476	432	500	832	293	210	79	188
278	300	404	502	578	672	245	195	10	127	348	265	366	451	327	106	313	485	377	382	190	1002	154	478	167	320	329	198	92	122	178	495	449	325	561	264	296	639	347	220	215	319	518	399	459	772	314	196	79	192
279	289	447	507	482	579	271	250	103	114	355	341	342	388	275	92	298	416	411	456	249	969	53	429	223	444	273	251	39	71	233	677	313	291	667	470	45	530	246	388	197	478	450	395	404	734	248	326	51	125
280	282	344	474	430	759	288	269	125	94	388	308	352	357	307	220	405	408	375	409	235	871	192	385	179	338	256	235	136	144	224	512	208	422	555	338	160	677	277	336	177	271	400	493	476	651	167	330	151	94
281	227	394	429	503	696	181	278	17	173	331	263	589	462	393	147	324	501	350	486	251	923	180	334	148	296	293	168	237	79	190	529	339	256	561	393	151	580	256	261	205	269	427	416	518	659	279	268	145	62
282	309	458	453	585	674	239	257	152	-6	500	380	529	415	438	158	244	481	271	451	248	891	130	301	176	331	306	262	152	154	267	476	251	308	590	402	224	601	293	340	221	358	451	408	507	779	255	116	66	154
283	322	408	572	499	814	251	302	142	22	339	346	421	310	249	186	260	405	418	453	179	883	169	333	212	354	313	170	78	40	262	413	314	287	567	380	128	653	270	318	207	333	406	445	469	618	194	246	84	56
284	343	330	587	378	660	259	285	24	66	409	247	387	360	317	177	313	434	373	464	221	881	60	439	78	306	255	125	141	103	218	533	270	365	649	390	192	606	295	417	247	330	353	374	400	695	249	309	62	132
285	299	392	554	544	675	273	334	95	101	299	303	416	346	258	121	305	421	398	364	252	924	175	315	80	486	272	228	121	75	273	390	344	335	562	367	154	582	283	380	229	319	610	474	526	712	273	255	119	235
286	298	458	521	649	663	279	291	193	13	465	359	368	321	209	86	218	413	346	425	264	960	221	365	146	411	255	183	163	93	275	452	301	360	536	360	192	601	318	325	214	341	404	396	630	595	234	174	101	167
287	289	467	564	548	653	304	236	84	50	460	335	436	311	300	189	318	405	314	370	223	848	150	212	204	346	291	255	202	81	178	571	280	306	482	324	178	603	250	344	216	259	477	397	522	677	256	237	136	135
288	288	436	476	509	633	341	225	67	12	314	276	381	361	229	162	366	496	279	382	186	949	182	310	198	352	245	250	152	86	170	482	264	365	542	313	122	577	359	338	247	273	436	433	484	613	315	211	130	120
289	308	419	510	537	682	290	282	107	167	381	329	421	409	400	69	320	445	498	419	185	924	142	381	197	332	213	188	126	93	217	494	306	296	537	373	137	518	292	272	279	309	543	313	478	599	163	183	85	243
290	246	426	523	632	556	274	221	85	183	367	341	429	418	372	106	318	465	327	386	217	820	128	235	215	373	213	190	129	174	92	440	303	346	606	368	140	627	269	370	300	354	467	349	457	704	206	252	144	156
291	341	482	434	606	617	277	269	107	194	300	396	405	283	259	129	278	414	405	353	290	836	187	300	165	305	398	237	144	87	190	488	285	374	606	436	223	560	409	358	231	307	515	470	569	674	209	215	97	192
292	329	446	475	537	765	317	206	101	216	353	351	416	434	334	177	316	403	472	449	211	868	154	320	166	376	293	180	80	106	236	430	292	336	522	393	166	478	285	410	161	401	560	474	512	649	199	243	48	189
293	304	448	474	442	637	312	251	142	186	297	294	424	337	114	181	260	344	436	390	192	766	235	240	222	424	307	189	161	81	211	482	353	248	561	333	107	618	257	346	190	329	550	415	550	808	146	224	123	106
294	345	385	608	439	571	240	210	56	228	278	293	443	413	386	167	318	474	394	410	128	847	132	363	158	194	222	123	174	68	223	538	372	419	543	457	169	533	313	380	167	316	410	399	589	572	295	252	70	144
295	395	333	470	560	710	281	140	114	229	426	252	296	326	293	183	282	459	439	329	289	867	180	330	142	324	234	231	63	166	179	453	304	333	626	384	142	531	308	446	226	361	436	429	516	647	213	238	42	184
296	279	414	404	614	505	184	247	124	128	349	147	363	333	297	230	317	500	403	357	205	763	127	262	213	406	252	93	148	191	158	504	285	352	542	339	156	655	294	310	186	437	516	422	395	796	229	173	54	182
297	359	417	477	624	696	219	270	118	204	413	266	472	332	305	91	311	390	372	375	244	760	81	319	243	320	318	199	174	130	235	478	315	316	601	355	145	648	322	303	343	297	385	370	562	715	204	281	126	229
298	291	416	561	592	685	303	247	97	121	396	295	476	299	362	161	355	442	435	335	201	701	174	260	258	413	215	187	142	97	249	423	353	317	465	331	272	590	265	293	203	312	428	524	481	670	283	266	96	181
299	334	515	388	494	580	229	354	85	66	272	294	435	412	303	123	285	495	373	430	358	827	119	359	140	366	318	207	157	125	149	497	362	370	632	401	206	596	332	405	238	414	462	455	407	613	145	214	76	157
300	328	374	458	495	643	312	221	160	157	357	413	373	356	309	181	278	478	318	440	281	790	205	358	152	307	310	261	205	63	271	471	283	275	586	394	126	611	288	310	174	115	473	323	524	526	222	411	143	139
301	297	483	566	395	735	349	226	35	215	439	205	417	377	330	183	319	538	392	574	216	777	126	298	174	332	279	165	147	143	247	373	359	325	580	355	187	617	354	344	330	362	429	339	412	695	187	237	105	229
[truncated: 289 more columns]
