# Supplementary material for: Reliability of an interneuron response depends on an integrated sensory state
Source: eLife. 2019 Nov 13;8:e50566. doi: 10.7554/eLife.50566 (PMC6894930; doi:10.7554/eLife.50566)
Supplement: Figure 5—figure supplement 2—source data 1. [file elife-50566-fig5-figsupp2-data1.xlsx]

## Sheet: AIA,AWA,ASK to 1.15uM dia
Figure 5S-2A
Stimulus	1.15 µM dia
	Video 1				Video 2				Video 3				Video 4
Frame (Pulse at frame 3000, 3600, 4200)	AIA	AWA	ASK		AIA	AWA	ASK		AIA	AWA	ASK		AIA	AWA	ASK
1	148.6	205.2	204.2		144.5	203.2	188.4		166.8	342.9	199.7		152.1	227.4	176.4
2	149	204.9	195.2		144.8	185.6	194.7		170.8	350	198.5		152.8	225.6	174.2
3	148.2	204.4	201		144.8	200	190.4		170.2	351.1	201.1		152.5	233.1	175.5
4	148.2	201.4	195.8		146.2	197.6	196.6		167.6	355.1	198.2		153.5	236	171
5	149.1	200.8	197.2		143.1	199.2	193.8		171.9	354.1	202.4		150.2	222.6	172.9
6	150.7	201.5	193.4		144.6	200.1	195.2		172.8	352.5	197.1		152.5	224	172.5
7	149.6	201.6	192.2		144.2	194.6	195.7		173.2	350.5	201.6		152.4	226.7	171.3
8	149.2	193.9	195.2		148.9	205.5	196.7		167.7	349.8	200.8		152.4	226.9	174
9	148.9	209.4	199.8		149.1	204	207.2		170.7	353.4	201.1		153.9	227.7	174.9
10	151	200	200.2		151.6	210.5	219.1		167.9	348.8	202.3		150.9	227.3	174.1
11	148.7	202	200.9		149.3	224	237		170.9	344.2	204.4		154.1	232.4	175.2
12	147.1	200.1	203.5		152.2	228.6	249.8		169.6	346.4	198.8		152.3	226.4	172.4
13	150.6	199.9	195.9		153.5	227.2	268.4		169.8	338.1	201.7		153.3	230.9	172.1
14	150.1	199.4	193.2		156.9	231.5	275.6		163.4	342.5	195.1		152.3	223.5	172.3
15	146.8	202.9	196.1		157	242	286.8		164.8	332.1	200.7		152	229.7	171.4
16	151	214	203.5		158.6	246.8	287.7		169.4	340.3	203.8		151.8	226.1	171.9
17	150	200	189.8		158.2	257.8	299.9		168.2	339.7	198.5		152.5	236.7	172.3
18	148.2	196.1	204.2		158.9	244.9	297.4		163	335.3	197.7		151.3	222.2	169.5
19	151	210.2	194.1		160.4	254.6	310.5		167.4	339.5	198.4		153.1	228.6	170.7
20	149.2	190.6	197.5		160.8	256.8	308.7		169.7	341.5	203.2		154.3	224.4	171.9
21	149.4	199.5	195.1		160.6	256.6	315.4		169	336.3	200.7		153.6	228.4	168.8
22	149.6	206.6	194.1		160.4	256.5	313.1		165.8	335.1	197.4		154.2	222.9	174.8
23	147.8	195.9	195.8		162.6	257.9	323.9		165.2	332.2	203.1		152.4	222.5	171.1
24	148.3	197.6	189.2		161.5	257.4	330.7		164.4	328.8	199.9		152.7	221.8	171.6
25	149.9	204.5	202.6		163.9	263.9	327.1		171.2	331.9	203.7		154.3	227.8	174.6
26	149	196	197.4		162.8	256.8	325.4		168.1	330.5	206.9		153.5	221.5	171.8
27	151.2	212.9	195		165.6	276.6	320.6		168.2	328.5	203.6		151.5	225.4	169.2
28	149.2	203.4	191.2		163.7	264.1	321		169.5	336.8	206		152.7	226.1	166.6
29	148.8	200.5	191		163	264.1	321.9		166.2	323.9	206.1		152.6	225.3	166.4
30	149.6	201.5	187.1		161.3	262.2	328.3		168.7	332.8	202.9		152.4	227	168
31	147.5	198	194		158.2	263.8	324.9		165	326.6	205		153.4	229.6	165.9
32	148.3	206	190.8		161.3	270.9	320.8		166.7	331	206		151.5	227.9	173
33	149	206.1	192.4		160.7	258.5	326.9		169.8	328.3	205.9		151.3	234.2	172
34	151.2	195	190.5		159.8	259.8	316.6		166.1	331.2	204.2		152.5	227	166.2
35	150.4	199.9	188.4		160.4	260.6	324.9		164.9	320.5	202.9		153.3	226.9	170.3
36	149.4	202.5	192.5		160.8	256.1	331.3		165.9	319.2	207.7		151.5	225.4	170.1
37	150.8	193.8	183.2		158.8	261.4	319.9		166.7	322.8	204.9		153.8	225.8	167.9
38	153	195.9	190.9		161.6	255.1	316.6		163.7	319	203.8		153.7	225.2	168
39	149	200	189.4		159.9	256.1	323.6		165.7	317.9	201.9		152.2	227.5	168.9
40	146.5	196.5	188.2		161.5	254.9	323.7		165.9	322.2	205		153.9	224.8	165.9
41	150.6	194.5	187.4		156.9	249.1	317.9		163.2	321.1	206.5		151.2	222.9	168.5
42	147.1	201.4	181.2		159.3	246.1	318.3		164.3	318.2	205.3		153.3	225.8	169.2
43	148.9	200.2	185.4		157.8	246.9	312.8		167.3	319.2	208.8		150.6	223	169.4
44	149.7	196.6	178.5		159.7	245.4	315.1		166.3	325.2	204.3		152	221.7	165.8
45	149.1	198.9	179.8		158.8	255.6	308.8		163.5	315.8	207		150.1	224.1	167.4
46	149.6	205	188.2		161	242.8	311.9		164.4	315.7	206.1		152.3	224.7	165.3
47	148.3	201.5	178.6		159	259.5	315.4		161.8	320.2	211.4		150.7	224.8	166.2
48	151.2	205.9	183.5		161.9	249.1	308.2		165.2	316.3	209.9		152.1	223.3	164.5
49	148.1	197.6	179.1		164.4	248.4	306.6		164.6	313.6	211.6		151.1	224.2	163.6
50	150.8	211.1	180.9		161.8	249	297.2		161.9	316.7	211.4		151.5	222.6	166.6
51	147.5	199.6	179.6		164.8	248.6	296.6		161.4	309.8	209.1		151.7	221	169.8
52	148.4	195.9	183.5		162	247.6	301.2		165.8	309.5	209.9		152.6	227.3	168.5
53	149.7	204.1	180		167	248.2	296.2		163.6	305.2	209.4		151.5	230.5	166.1
54	150.2	201.8	178.2		166.8	252.4	306.1		160	306.7	208.7		150.4	228.2	166.9
55	149.7	190.5	181.6		169.9	255	295.9		162.8	305.1	209.7		150.2	223	167
56	147.8	199.6	180.8		168.8	246.5	303.4		161.1	307.4	210		149.9	230.5	166.4
57	148	203	181.8		170	249.5	303		164.6	302.9	208.7		153.6	224.9	166.7
58	149.3	206.5	179.9		173.8	261	297		164.5	266.8	222		154.4	226.7	167.8
59	150.2	207.6	187.4		173.1	260.8	302.8		162	292.3	211.2		153.8	226.5	168.3
60	148.6	207.1	183.4		173	269.5	301.2		161.5	298	211		151.7	228.2	167.2
61	149.4	210.6	175.5		175.6	260.6	311.1		160.8	295.5	212.5		153.5	227.6	167.8
62	149.8	200.2	185.9		177.8	260.2	302.1		161.9	297.7	214		151	227.6	168.9
63	149	204.6	184.6		182.1	265.9	311.4		161.8	305.2	212.8		152.3	231.9	169.1
64	147.9	198.6	190.6		178.9	256.8	297		164.6	295.9	210.3		151.3	229.2	166.7
65	147.9	197.4	186.9		185.1	263	297.8		166.2	268.8	216.6		152.5	228.3	169.9
66	148	202	184.4		180.7	271.6	310.3		163	302.3	215.1		151.4	232.9	168.3
67	149.8	201.4	190		182.7	270.2	297.9		162.6	304.5	216.5		151	234.8	169.1
68	148.4	208.1	188.6		187.1	272.9	296.2		161.9	303.9	208.2		151.7	223.1	169.9
69	150.9	203.6	190		186.9	268.4	287.2		165.1	305.6	214.2		151.4	229.2	170.6
70	148.7	200.5	192		183.6	263.4	295.1		162.4	309.9	210		154.7	228.8	171.6
71	148.5	198.1	195.2		184.7	284	295.3		164.4	312.2	212.6		152.7	228.5	169.6
72	148.6	203.2	191.9		183.1	254.2	303.6		161.1	303.2	212.5		151.7	229	170.2
73	149.1	198.9	194.4		182.7	259	306.4		160.3	314.3	209.2		151.5	225.4	169.1
74	146.9	209.2	187.6		182	253.1	294.3		163.2	314.1	210.8		151.4	227.3	168.1
75	149	194.5	191.6		181.9	252	301.1		161.8	310.8	213.8		150.7	229.2	168.9
76	147.3	196.2	193.6		176.5	251.4	298.6		160.4	308.2	211.4		151.2	225.8	169.9
77	149.9	202	191.4		177.8	258.1	301.1		163	317.7	211.8		150	234.2	169.7
78	147.6	198.2	185.5		174.6	260.1	299.9		161.9	311.9	212.4		151.9	231.4	170.3
79	147.8	204.8	183.9		174.6	252.5	294.4		162.7	308.5	214.8		151.2	228.2	168.1
80	148.4	209.6	183.9		172.9	254.5	295.8		166.3	275.3	214.4		149.7	226.7	171.3
81	146.8	198.5	190.5		171	264.9	290.6		162.8	310.5	212.9		151.8	233.7	171.1
82	148.2	202	176.5		168.5	251	294.2		164.9	308.6	214.2		151.7	227.9	169.9
83	149	204.6	190.5		167.7	265.1	294.2		161	300.9	214.2		152.7	230.8	171.5
84	150.4	207.8	191		165	257.9	293.9		161.3	308.3	210.2		152.6	226.8	171.5
85	147.7	203.8	191.1		165.4	248.2	293.7		163.1	301.6	211.4		149.9	228.6	169.7
86	146.6	195.5	185.6		164.4	254.5	289.5		162.5	303.4	216.4		151.5	226.6	168.9
87	148.4	203.6	187.8		161.1	254.4	281.3		165.1	307.5	212.4		151.9	227.5	172.5
88	148.5	201.1	187		157.9	248.8	279.7		164.8	295.9	211		151.1	225.9	170
89	149.2	196.4	195		158.6	251.4	287.1		162.4	305.3	215.9		151.9	232.1	169.8
90	147.7	194.4	182.2		156.9	248.9	283.4		163	307	210.5		151.3	224.3	171.2
91	145.9	207	180.8		158.9	250.1	285.9		164.3	270.8	214.1		152.2	233.4	170.7
92	147.5	203.9	193.4		154	248.9	281.8		164	304.1	209.6		152.7	227.9	169.6
93	147.1	207.1	181.1		153	243.6	267.3		164	276	214.1		152	227.1	168.6
94	148.2	202.2	188.8		153.8	245.4	265.6		162.2	299.8	216.2		152.7	231.6	170.1
95	148.1	207	178.6		156.2	242.2	272.1		166.2	306.8	216.5		153.2	227.3	172.4
96	148.9	204.9	182.5		158.1	244.4	263.3		164.3	305.3	211.2		150.7	228.6	171
97	148.3	202.8	183.8		157.7	238.6	268.4		162.6	303.2	213.1		149.8	225.4	169.8
98	148.9	207.2	195.2		156.9	239.1	264.9		162.4	309.9	209.3		150.3	226.8	172.8
99	149.4	197.6	187		153.6	246.9	273.5		162.8	310.9	216.7		152.6	228.2	172.5
100	148.4	208.9	195.6		157.1	242	272.7		163.3	313.8	211.6		150.3	233.1	171.4
101	149.5	194.6	177.9		155.4	247.9	263.8		161.1	313.7	210.1		153.1	232.9	171.4
102	149.2	201.6	186.8		154.7	242.6	275.1		162.8	313.1	214		152.1	229.1	171
103	149	203.5	186.9		154.4	238.4	272.9		163.4	318.4	212.9		151.8	233	173.5
104	150.2	198.8	184.5		154.6	233.1	261.3		163.8	319.4	215.9		152	232.9	173.5
105	148.9	202.1	181.1		154.8	234	265.2		161.1	317.6	215.8		150.8	231.7	176.7
106	148.1	196.8	191.9		154.9	234.8	258.9		164.7	324.4	216.3		152.8	227.4	175.8
107	149.9	198.9	188.6		154	241	254.6		163.4	319.3	213.7		153.1	232.6	174.9
108	149.3	199.1	184.5		153.7	246.6	253.1		163.1	329.7	213.5		152	227.8	171
109	149	197.2	184		154.7	244.6	250.1		165.4	319.4	212.4		152.3	238.1	176
110	150.6	206.6	184.2		154.9	246.4	250.2		162.9	327.8	212.7		152.8	234.4	172.3
111	148.9	205.8	182.4		155.9	240.4	252.9		164.2	331.3	211.8		151.7	224.9	169.5
112	150.9	202.8	182		155.9	236.4	253.9		164.2	330.5	213.3		153.1	227.4	173.5
113	149.2	197.9	182.5		157.8	241.5	264.2		162.4	328	211.6		151.7	226.2	173.1
114	150.5	200	189.4		157.5	238.9	262.4		164.2	321.6	209.7		151.1	222.8	172
115	149.8	205	194.1		158.9	244.8	257.8		163.7	316.4	210.6		151.6	220.9	170.9
116	148.7	203.6	188.4		158.3	241.5	259.8		162.7	312.2	207		152.9	229.1	172
117	148.8	201.2	187.5		157.4	238.6	259.8		160.2	317.3	213.8		153.6	225.1	173.8
118	149.5	207.1	188.9		156.1	233.5	264.4		161.7	309.4	209.8		151.2	226.2	172.6
119	148.1	209.5	184.9		160.6	247.1	261.1		159.3	308.1	208.5		152.2	226.4	173.4
120	150.3	204.9	192.4		156.1	239	265		162.9	309	211.1		151.6	223.9	172.2
121	148.7	201.6	193		152.1	239	255.1		163.5	312.4	211.2		151.4	232.8	171.3
122	148.6	199.1	186.2		159.7	234.4	257.6		167.6	304.2	210.5		152.9	233.3	173.7
123	149.1	201	184.5		157.7	235	260.2		160.9	299.3	210.4		151.4	222.2	171.1
124	150.7	198.4	182.9		157.7	238.1	258.5		160.4	298.9	211.2		150	221.6	175.4
125	151.3	206.8	184.8		155.8	249.9	263.5		163.4	294.7	213.2		150.9	222.7	172.2
126	149.9	208.1	191.6		156.8	231.4	258.7		162.6	293.8	212.7		150.9	228.8	170.9
127	150.2	203.9	194.4		156.9	239	261.9		160.2	295.3	206.4		150.4	231.8	171.9
128	148.8	207.9	188.8		155.8	233.9	258.2		164.4	291.1	206.8		151.9	225.1	170.6
129	150	202.8	194.4		156.2	240.6	249.6		162.6	292.1	210.7		150.9	223.8	172.7
130	149.2	197.2	190.4		155.5	239.8	254.6		162	286.4	212.4		150.3	230.1	172.6
131	148.9	202.1	186.5		157	230.9	250.5		161.4	284.5	208		149.1	230.2	171.3
132	152.7	204.9	188.9		152.9	240.2	247.4		161.2	277.2	206.3		150.4	225	169.5
133	149.8	201.1	192.6		153.9	229.9	242.9		163.2	278.5	205.3		151.2	229.6	169.1
134	150.6	198	185.2		153.8	230.1	246.4		161.2	279.8	206.3		150.5	231.9	172.2
135	148.5	203.8	186.6		155.2	233.1	249.1		163.6	274.8	204.6		150.3	230.3	171.3
136	147.9	195.1	186.2		155.9	234.6	247.9		161.3	272.8	204.6		153.1	229.7	169.5
137	150.4	199.6	181.4		154.2	236.8	241.2		164	275.5	204.5		152.1	230.4	172.9
138	149.6	196.6	184.4		153.8	237.6	241.9		162.8	279	208.1		151.6	229.5	170.5
139	148.1	201.8	185.2		157.4	241.1	242.9		160.4	272.3	207.5		153	227.1	172.2
140	148.9	205.1	192.8		155.2	236.5	242.8		163.2	268.2	202.4		149	231.8	173.9
141	149.7	207.1	186.8		154.2	237.8	253.7		157.7	271.1	204.7		151.8	232.5	169.7
142	148.4	191.4	189		155.4	224.5	248.4		158.1	271.2	208.3		149.1	223.8	171.3
143	148.2	203.2	190.9		154.4	228.9	247.6		163.8	266.9	202.1		147.7	222.5	171.2
144	148.8	199	190.1		157.9	236.2	251.1		160.4	269.2	204.2		152	230.4	173.2
145	150.7	203.9	183.8		153.9	237	250.7		161.4	268.8	205.8		153.8	226.4	171.1
146	150.4	198.6	190.1		156.8	230.5	258.4		160.6	268.7	203.4		149.5	226	168.3
147	150.3	200.2	191.5		157.5	232.5	263.9		161.5	267.2	204.1		151.6	225.1	171.4
148	149.9	205.4	181.6		155.3	232	273.3		161	266.3	207		149.6	225.6	170.9
149	148.8	200.4	188.8		158.2	233.8	270.8		161.5	269.2	201.9		150.5	220.9	170.2
150	151.5	207.5	195.4		153.3	238.2	285.4		162.6	259.9	202.5		150.6	223.2	168.2
151	150.7	204.1	185.4		155	227.5	276.6		159.2	268.4	206.8		151.7	230.1	170.6
152	151	198.2	189.8		157.2	241	288.2		157.9	260.1	202.6		151.2	227.4	167.3
153	149.7	200.8	189.5		157.2	241.1	287.6		161.6	263.2	201.8		151.8	229.3	170.7
154	150.5	199.1	176.5		157.3	231.2	290.4		160.7	261.5	200.7		151.1	228.1	167.4
155	148.7	202.2	182.5		158.9	230.8	302.5		158.8	256.7	203.7		149.8	225.6	169.4
156	149.8	204.1	189.9		157.5	227	300.1		160.9	250.2	201.7		152.4	230.5	168.9
157	150.4	206	192.1		160	231.5	307.7		160.5	255	202.9		153.4	225.4	170.2
158	150.2	212.6	187.2		155.2	234	298.3		159.2	256.7	200.4		150.5	225.3	167.7
159	149.8	206.1	186.9		156.9	221.1	310.3		161.9	258.8	202		151.9	227.2	167.1
160	149.2	205.1	192.9		158.5	230.8	301.9		159.6	254.3	202.3		149.6	225.8	168.1
161	148.1	206.4	185.9		155.4	224.2	308.6		159.3	254.1	197.9		151.1	226.8	168.3
162	147.1	198.5	185.5		157.5	233.8	307.6		157.3	248.9	204.7		151.9	231.9	167.5
163	147.1	197.9	186		155.5	235.9	307.6		162.5	239.7	203		152.4	221.9	169.2
164	149.1	198.1	187.5		155.2	234.9	302.2		162.2	254.4	205.9		152.5	225.3	168.3
165	148.1	202.4	183.1		157	229.8	307.8		160.5	248.8	204.2		149.7	221.5	171.7
166	148.9	210.8	187.8		156.9	234.4	306.3		160.4	252.8	201.3		152.9	236	169.4
167	149.6	197.1	186.9		153.2	234.8	308.6		159	254.3	203.3		151.7	231.5	171.2
168	149.2	205.9	185.9		155.3	228.2	309.1		163	248.5	201		150.7	228.9	170.9
169	149.2	198.8	186.9		155.5	233.4	314.8		158.1	253.4	202.8		149.5	227.8	170.5
170	148.9	209.6	191.2		154	231.2	312.8		162.2	247.2	201.9		151.5	227.7	170.4
171	148.8	200.6	187.5		156	231	311.2		160.2	249.9	201.4		152.3	229.9	167.7
172	150.1	206.5	186.5		154.6	232.1	314.4		161.5	255.5	203.3		151.7	230.5	171
173	150.3	205.9	188.1		152.8	233.8	309.5		159.4	254.7	205.7		151.1	229.4	164.7
174	149.1	197	186.2		155.1	237.9	316.3		158.5	252.6	202.4		151.5	229.1	167.5
175	148.6	203.9	189.2		153.8	229.2	318.8		157.6	250.2	199.2		151.2	229.9	171.9
176	151.1	199	184.5		152.3	227.2	307.1		159.9	250.4	200.3		150.5	229.1	170.1
177	148.9	203.8	185.2		154.4	230.1	307.6		160.1	252.4	200.5		152.2	225.2	171.7
178	149.9	209.4	192		152.6	226.2	301.6		159.7	252.2	197.2		150.9	237.4	169.5
179	150.1	208.1	176.8		153.8	231.6	300.8		159.8	252.1	200.2		153.2	235.1	170.3
180	149.9	203.4	182.8		154.7	231.8	303.7		159.9	249.9	203.4		150.2	232.9	168.6
181	149	208.6	185.2		155.6	231.2	308.2		162.8	250.2	198.4		151	227.8	170
182	151.4	202.8	191.8		156.2	235.6	306.5		162.7	252.4	198.8		150.4	233.9	167.2
183	148.6	203.1	180.9		154.1	231.6	306.5		161.7	251.4	200.1		149.8	227.8	172.1
184	150.7	208.8	182.1		158	230.1	300.6		160.8	252	200		149.7	226.6	170.6
185	150.4	202.8	189.1		158.4	232.6	303.8		156.9	251.8	199.2		152.2	230.6	168.8
186	152	205.8	186		152.7	229.2	305.4		160.4	252.2	198.2		152.2	227	166.3
187	151.6	208.1	192.1		154.6	230.4	298.1		158.8	249.6	200.3		153.1	226.9	166.7
188	150.9	207.6	181		152.5	224.5	298.5		161.1	250.6	200.3		152.7	230.7	167.8
189	150	202.1	185.1		151.6	234.8	300.1		161.9	249.4	197.4		152.8	232.4	168.1
190	149.9	205.1	187.5		156.3	229.2	303.3		159.5	253.8	199.2		153.3	233.5	171.2
191	150.8	206	188.5		154.6	233.4	298.6		159.4	250.9	200.2		154.2	231.1	168.8
192	150.3	206.1	182.5		156.1	225.5	290.3		160.1	241.9	205		151	237.5	171.6
193	151.1	199	184.1		154.9	231.6	294.6		158.9	252.9	200.8		152.5	234.1	168.7
194	151.2	203.6	182.5		153.1	224	292.5		160.7	253.6	197.5		152.9	232.4	172.4
195	152.1	213.4	185		153.9	227.2	293.1		157.8	260.4	197.7		152.8	227.6	168.7
196	151.3	208.4	184.6		153.4	218.2	287.6		159.4	255.7	195.3		153.7	231.4	169.1
197	152.7	201.2	178.8		152.6	226.2	285.9		159.8	260.3	201.3		151.1	234.1	168.7
198	152.3	208	181.4		156	231.2	289.5		159.4	254.4	196.3		151.4	228.9	167.9
199	150.7	202.9	186.6		154	219.2	286.6		160	253.8	193		152.6	229.2	166.7
200	151.6	207.4	185.9		153.7	224.6	282.6		158.3	254.6	196.8		152.9	231.4	169.4
201	151.9	205.6	186.5		155.8	219.8	293.9		160.5	255.6	198		151.7	237.9	164.5
202	150.4	200.4	187.4		152.9	230.9	280		159.8	251.4	196.6		151.9	233.8	169.5
203	152.4	211.5	191.1		154.4	218.8	294.2		159.2	254.3	198.9		150.9	234.2	167.8
204	152.7	211.4	185.1		154.9	222.6	287.2		161	255.2	195		151.6	233.1	169.2
205	150.5	215	189.5		154.8	218.2	296.6		161.7	256.4	195.1		153.3	229.1	167.8
206	152.8	201	192.4		155	224	283		159.8	253.4	194.4		153.3	227.9	166.3
207	152.8	208.4	199.4		153.6	232.4	299.8		161.2	256.2	195.6		152.8	235.7	171.4
208	152.1	208.5	189.4		155.3	221.5	297.5		159.9	251	199.8		150.3	232.2	165.2
209	152.9	210.4	191.9		154.1	211.6	290.4		158	261.9	195.3		151.4	227.5	165.1
210	152.2	198	197.2		156.8	221.9	291.1		161.2	253.5	193.1		150.8	223.4	170.7
211	152.1	211.1	194.8		153.5	219.6	285.3		158.8	255.2	195.3		152.4	228.4	166.9
212	152.6	207.8	196.8		153.4	218.1	288.4		160.8	260.7	191.6		152.6	231.9	164.1
213	152.6	205.6	201.4		154.2	220.1	290.4		157.6	257.5	190.5		151.2	233.6	165.9
214	152.8	208.5	194.6		153.1	214.8	291.9		159.2	259	192.7		150.6	229.6	166.1
215	153	208.6	200.1		151.2	223.1	291.9		160.8	254.1	191.2		151.5	228.9	167
216	152.4	209.1	193.8		153.1	216.9	291.6		160.2	250.5	192.1		150.9	230.1	166.4
217	152.9	208.5	202.2		153.2	217.1	290.4		159.6	254.5	193		151.4	230.5	165.2
218	153.9	200.1	199.1		155.4	210.9	293.3		160.2	253.8	193.3		151.3	231.8	169.4
219	152.9	202.5	197.9		154.5	216.5	288.2		160.9	253.6	190.8		152.2	232.4	165.8
220	153	209.2	200.6		153.6	217.2	285.6		162.2	256.1	190.5		151.7	235.3	167.6
221	154.7	210.4	201		154	209.1	281.6		162.3	256.7	187.6		149.7	238.3	166.5
222	151.9	203.9	199.1		151.8	214.2	279.6		160.9	253.7	188.5		150.2	230.1	170.4
223	152.6	200.4	197.8		150.8	224.1	292.1		159.6	256.2	187.2		152	232.4	173.6
224	151.5	203	195.8		153.4	209.6	281		156.8	250.9	186.3		151.1	235.8	173.7
225	151	205.5	196.2		154.8	228.2	285.6		161.7	254.9	188.8		151.6	235	167.6
226	150.6	215.4	190.4		153.5	221.4	274.7		158.9	256.6	189.8		150.5	233.1	167.7
227	152.1	204.5	194.9		154.5	217.5	272.9		159.9	255.9	187.1		149.8	234.5	169.3
228	152.7	208.1	204.6		154.8	211.9	284.3		159.9	250.4	188.7		152.5	233.8	166.6
229	152.1	210.8	202.1		155.8	216.4	271.9		159.6	251.5	189.6		152.2	235.9	165.8
230	151	211	193		150.6	230.4	279		157.3	252.4	187.2		152.4	231.4	171.5
231	153.1	209.9	204.8		151.2	216.9	272.8		160.3	248.6	188.2		151.8	233.1	166.6
232	150.8	215.4	200.4		150.8	218.4	272.3		160.1	248.6	189.5		150.6	226.1	166.9
233	149.4	210.8	199.9		153.7	220.1	268.8		158	252.9	191.2		154	232.9	169.4
234	151.2	206.1	193.8		153.9	222.9	263.6		159.6	244.4	189.8		152.3	231.6	167.9
235	150.8	205.4	201		155.5	220.9	269.7		160.8	247.2	191.5		153.4	232.8	169.9
236	148.9	214.4	200.4		153.6	223.9	271.9		163.1	248.4	186		151.7	235.8	169.8
237	149.2	204.5	209.4		151	225.4	274.2		163.6	251.8	186.8		152.5	234.2	169.9
238	151.2	207.4	201		151.2	210.2	269.9		160.7	257.7	189.8		150.6	235.5	167.1
239	151.4	194.1	215.1		150.7	224.8	261.8		160.1	257.2	188.7		152.6	233.2	171.2
240	150.7	210	207.1		150.5	213.6	267.2		161	256.3	188.6		151.2	229.4	169.7
241	150.7	197.5	213.4		150.9	211.8	266.2		162.6	258.8	189.2		150.7	233.7	170.6
242	152.3	208.1	203		151	211.2	268.4		159.2	261.9	185.9		151.3	239.8	168
243	150.1	203.4	206.8		149.5	221.6	265.6		161.7	259.3	182.8		152.3	227.6	171.1
244	151.6	207.8	204.9		151.8	219	270.3		163.4	257.3	185.3		153.4	225.6	171.8
245	151	214.8	212.5		153.9	218.5	265.5		159.4	263.9	183.9		150.1	229	168.3
246	150.3	207.4	199.5		153	218.6	266		161.8	258.5	185.7		152.6	237.2	170.6
247	151.3	201	203.8		152.9	215.6	264.8		162	266.1	185.9		152.3	230.8	166.2
248	151.6	207.1	204.8		152.8	220.9	276.8		160.7	260.7	185.2		151.4	231.6	167.4
249	150.3	201.9	207.8		154.2	218.6	268.2		160.4	256	185.4		151.1	228.9	169
250	149.9	210.9	205.8		149.3	213.8	277.6		158.6	258.9	184.5		153.1	231.6	170.7
251	150.7	204.6	212.1		152.2	215.9	274.1		160.4	260.1	182.4		151.7	229.4	172.4
252	149.5	202.6	213.1		153.9	219	269.1		160.8	253.7	180.1		151.5	226.5	168.9
253	152.2	201.4	200.4		151.4	212.5	268.7		157.1	257.5	180.8		151.4	228.4	171.2
254	150.3	205.5	204.4		155.4	221.2	260.7		159.9	256.4	181.8		151.1	228.8	172.8
255	151.7	201.5	207.6		151.8	219.4	264.4		160.1	257.7	177.3		150.8	228.2	168.6
256	148.4	209	202.6		152.2	213.6	267.1		159.8	256.7	182		151.7	228.4	170.2
257	148.9	204.1	206.4		150.6	213.6	264.2		160.8	251.1	181.1		153.9	228.2	172.8
258	150.3	201.6	211.5		153.3	208.2	267.8		161.3	257.6	180		153.2	228.5	169.4
259	149.6	195.4	204.2		152.5	217.9	265.9		162.1	250.7	182.8		152.9	237.7	174.2
260	149.9	210.2	202.2		151.9	215.8	262.9		160.2	254	180.9		152.2	232.8	173.5
261	150.4	206.8	204.4		154.1	219.4	265.2		160.5	250.7	185.2		152.1	229.7	171.8
262	151.7	199.5	209.6		151.2	213.1	260.3		158.8	254.1	183.4		151.8	227.9	171.2
263	149.4	200.9	201		151.2	211.6	262.3		162	252.7	181.6		151.3	223.7	171.1
264	151.2	204.1	201		150.3	219	263.2		158.1	253.2	183.2		151.1	227.9	175.7
265	149.4	199.6	204.5		151.1	219.2	266.8		157.6	253.2	184.9		152.4	224.4	173.2
266	149.9	204.8	202.4		151.4	200.8	260.3		157.2	254.3	186.4		150.9	227.8	173.9
267	149.3	207.4	201		150.8	211.2	257.7		159.3	248.9	183.5		151.2	226.9	176.6
268	149.8	204.5	198.5		152	211.2	252.6		157.3	251.5	185.9		152.3	229.5	174.5
269	150	202.2	212.4		155.2	208.9	257.2		160.3	254.9	185.4		151.1	230.8	173.7
270	149.3	190.8	207		151.3	211.5	253.8		157.4	249.6	192.8		152.4	226.7	171.4
271	150.5	197	204		151.4	202.9	259.1		160.7	252.6	186.3		153.9	227.4	173.9
272	149.4	195.9	206.4		150	218.4	262.8		159.4	249.3	189.6		150.3	228.1	174.5
273	151.3	198	203.9		154.1	218.1	252.3		160	253.6	187.6		152.3	230.7	174.6
274	151.4	206.5	201.9		151.5	213.1	257.9		161	251.5	193.4		152.9	220.5	174.4
275	149.6	199.1	208		152.1	211	255.8		160.6	250.8	189.8		153	233.1	174
276	150	202.2	206.9		151.7	220.5	252.4		160.4	250.6	192.2		149.4	225.7	176.4
277	147.8	197.9	211		153	211.4	255.4		160.8	252.4	192.2		152	228.2	173.4
278	148.5	205.1	199.8		151.6	210.2	254.2		155.5	248.6	188.6		153.1	231.8	173.4
279	148.9	196	201		154	207.8	264.9		162.4	251.4	191.5		151.4	226.8	171.8
280	149.4	205.4	204.4		152.8	214.4	257		160	250.6	190.6		152	228.7	176.2
281	151.3	204.8	208.2		150.2	223.5	255.2		158.2	249.1	190.7		150.7	230.6	169.8
282	148.3	201.8	198.1		151.7	215	256.9		158.7	252.3	186.2		152.3	230.1	172.7
283	149.4	197	208.1		149.3	216.5	255.2		162.9	250.1	189.7		151.7	227.1	173
284	148.4	200.8	207		148.9	208.9	263.4		161.8	252.8	190.9		151.6	232.3	172.8
285	150.6	208	203		151.3	213.2	262.6		159.4	248.5	189.7		154.1	224.3	169.9
286	149.1	204.5	203.5		152.3	221.6	256.6		161.7	254.6	193		153.4	226.9	171.8
287	149	202.1	200.1		153.8	210.6	257.6		162.1	254.8	191.9		153.3	227.5	172.3
288	149.1	201.9	197.5		153.2	216.1	250.8		157.8	257	193.2		153.4	230.2	173.7
289	149.3	202.1	202.6		150.1	219.8	251.1		161.8	253.5	191		151.6	230	172.6
290	149.4	200.6	206.5		149.8	214.9	259.3		157.8	257	196.5		153.6	232.5	172.3
291	148.7	209.4	204		148	210.9	258.8		159.9	261.9	192.4		153.6	229.5	172.4
292	149.2	204.9	194.2		150.5	220.5	250.7		161.3	255.8	196.4		153.2	227.9	173.8
293	149.6	209.8	191		151	208.5	250.6		162.5	262.6	195.3		152.4	232.3	172.8
294	147.9	204.9	195.6		150.8	222.2	253.8		159.1	257	196.2		151.8	225.5	172
295	149.8	201.9	195.9		151	215	246.2		161.8	262.8	195.6		152.2	231.8	171.4
296	148.9	205.9	200		152.7	217.8	247.4		157.9	259.1	195.4		152.1	225.2	172.5
297	149.5	209.8	194.5		152.1	209.9	252.8		160.1	260.2	196.2		151.5	229.8	172.1
298	149.2	201.6	191.8		150.1	214	244.4		162.6	262.7	189.4		152.2	225.9	169.4
299	150.1	210.2	197.8		153.9	212	251.2		163	259.1	193.8		152.5	229.4	171.1
300	148.1	205.5	199.4		152.2	217.4	238.9		162.2	261.4	191		151.7	224.3	171.4
301	150.3	205.5	200.9		150.5	219	245.6		161.3	264.2	192.3		153.1	225.6	174.1
302	150.6	203.5	201.2		151.2	219.2	245.9		157.1	258.4	190.5		151.2	231.4	170.7
303	149.7	208.8	201.6		154.8	214.8	240.5		161.8	258.5	194		151.1	227.6	169.2
304	151.7	211.1	203.9		152.8	210.8	238.5		164.1	261	195		153.5	228.8	172.7
305	149.2	212.4	201.8		146.8	218.4	241.6		163.2	270.1	196.5		151.7	228.9	169.3
306	147.9	210.6	206.1		149.8	223.9	245.9		161.8	263.7	193.9		149.5	222.8	167.8
307	147.3	209.4	200.1		152.9	222.2	243.6		161.5	263.5	194.8		153.6	225.2	171.7
308	148.3	208.2	203.4		151.2	214.9	246.8		160.2	255.1	195.5		151.9	226.2	173.9
309	147.2	206.9	191.2		151.8	225	241.2		163.6	257.6	191.2		150.1	224	168.4
310	148.6	206.1	206.9		154.7	215.6	243.4		160	255.9	190		152.9	224.4	171.1
311	149.6	198.1	207.1		150.9	226	248.4		158.8	254.6	192.6		152.5	227.4	172.9
312	147	206.8	211.2		153.2	216	242.3		161.9	255.7	194		152.6	225.2	171.8
313	150.4	208.9	214.9		148.4	218.6	241.1		163.7	263.4	193.6		150.7	230.2	169.9
314	147.7	202.6	208.9		149.5	215.1	241.5		163.7	261.5	198.9		151.1	223.4	172.9
315	148.9	203.5	201.6		152.6	212.9	243.8		162.7	263.6	196.1		152.1	227.9	171.2
316	149.2	204.4	214.8		151.6	215.4	234.1		161.5	258.4	194.3		151.6	232.5	169.4
317	149.6	206.1	211.6		149.9	216.4	234.2		159	260.4	192.1		152.1	226.2	170.8
318	147.7	200.6	214.1		152	219	237.8		159	257.6	195.4		152.2	225.1	172.5
319	149.4	201.4	207		149.6	217.1	234.9		161.2	261.4	195		151.6	223.8	174.1
320	149.1	202.1	198.5		152.2	228	230.5		162.3	263.5	194.6		152.8	229.8	171.7
321	148.9	200.5	206.4		152.6	211	233.8		162.9	261.6	195.8		151.4	219.2	171.5
322	150.3	205	206.9		151.8	212	236.4		162.3	261.3	193.8		152.2	221.1	169.4
323	148.7	196.9	207.5		151.7	219	229.4		162.9	257.3	194.8		152.1	222.8	172.8
324	149	209.1	204.2		151.2	210.8	225.9		160.9	253.1	196.4		153.9	221.8	170.9
325	146.9	202.8	203.8		152.9	204.4	226.4		163.8	253.3	193		153	226.8	171.2
326	148.7	204.5	206		150.8	220.2	226.6		163.4	253	192.9		153.9	220	171.7
327	149.9	207.8	202.2		152.8	219.5	229.5		162	248.2	193		152.4	223.8	167.9
328	147.6	205.9	202.6		149.1	221.8	231.8		159.8	252	194.2		156	227	170.4
329	149.1	200	199.8		150.2	206.8	231.9		161	248.9	196		153	224.6	171.6
330	147	202	202.1		151	214	236.9		158.4	249.7	193.7		154.2	227.5	168.1
331	148.7	204.6	198.2		153.9	213.9	244.3		161	248.2	194.8		153.3	227.2	171.8
332	150.6	206.5	205.5		152.3	212.8	245.7		158.2	244	194.3		154	223.2	170.3
333	150	197.6	209.6		151.6	217	247.9		162.8	245.8	196.9		154.2	221.1	167.6
334	149.7	196.8	204		153.4	212.1	254.8		165.7	244.1	196.2		151.7	217.7	168.7
335	149.7	201.4	206.8		149.9	214.4	249.2		163.3	250.5	197.2		152.4	231.5	166.5
336	149.2	209	199.1		152	216.9	239.3		161.1	249.6	193		151.6	229.1	167.5
337	150.5	210.1	192.4		148.3	209	248.3		164.6	245.6	194.7		152.6	219.6	166.8
338	149.5	197.8	196.5		149.5	212.2	253.2		162.6	247.2	195.3		154.9	230.3	170.3
339	147.5	205.1	191.2		149.4	207.6	249.5		162	244.3	191.7		153.3	228.5	169.1
340	150.3	204.5	200.5		147.6	214.6	247.1		163.8	248.9	194.4		153.6	226.5	171.1
341	148.7	206.4	205.2		151.4	213.8	246.4		165.4	240.4	195.4		152.7	223	172.8
342	149.2	203.6	194.5		151.1	213.2	244.9		160.3	242.3	198.7		153.4	228.3	167.2
343	148.4	206.1	190.9		148.9	223.4	242.8		164	241.4	191.5		153.8	228.9	173.5
344	149.1	205.2	200		152.2	226.1	247.8		166.5	250	192.2		150.4	224.8	167.9
345	148.8	204.8	199		151.2	216.9	245.8		165	253.1	197.9		153.2	227.3	169.2
346	148.2	198.9	196		150.2	224.4	247.8		159.7	240.9	194.9		152.2	229.4	174.4
347	147.5	206.5	202.9		149.9	218.5	243.2		163.8	242.9	192.3		155.4	223.8	173.8
348	149.6	199.9	205		149.3	218.8	238.9		161	244.8	197		151.5	232.1	171.9
349	149	206.1	200		151.7	213.6	247.8		161.3	246.9	192.4		154.2	227.4	177.2
350	149.5	205.8	206.2		150.5	217.9	248.6		162.2	244.2	197.1		154.1	228.2	174.4
351	150.4	203.5	205.4		153.4	216.9	243.6		166	240.8	193.8		153.6	234.1	173.6
352	152	213.4	201.9		151.5	209.6	246.4		161.5	243.6	189.9		150.6	226.9	176.4
353	149.2	196.4	198.1		151.8	222	243.9		161.8	244.4	193.7		151.8	227.9	173.6
354	149.9	203.8	195.4		150.7	213.4	243.3		164.5	246.5	193.5		151.4	223.5	174.7
355	148.7	208	197.9		149.6	216.6	236.6		163.5	249.8	190.9		152.4	223	170.5
356	147.1	195.8	192.9		150.4	211.1	234.6		162.2	243.3	191.6		151.6	231.6	176
357	150.4	201.5	192		151	218.8	238.2		161.7	246.4	196.6		152.5	230.3	175.8
358	148.7	199.8	193.1		152.2	208.5	238.4		160.6	247.6	192		152.7	224.6	173.3
359	148.5	206.8	195.2		154.4	219	241.2		161.1	247.2	194.1		152.6	227.8	176.1
360	147.1	198.8	190.6		151.1	218.5	230.6		160.6	249.7	194.6		152.9	230.9	175.7
361	147.1	192.8	187.2		147.9	210.6	231.8		160.1	245	196.1		152.9	229.4	173.4
362	149.6	201.8	194.8		151.2	217.1	228.7		163.6	245.2	192		151.7	227.4	178.5
363	149	200.9	189.5		147.7	207	226.8		163.8	241.7	198		151.9	226.6	176.5
364	147.9	198.8	190.9		151.6	218.8	229.8		161.7	242.9	191.8		149.2	230.1	174.2
365	149.4	205.5	191.6		151.2	213.2	230.1		159.2	241.4	193.7		151.8	227.5	171.8
366	149	196.6	195.5		146.9	205	228.2		161.9	238.2	193.6		153.7	228.7	172.2
367	147.1	205.5	183.5		151	212.8	226.9		158.8	237.1	194.6		150.2	229.2	173.9
368	149.2	205.5	192.9		150.5	212.2	226.3		158	238.8	192.6		151.3	231.3	172.6
369	149.3	197.4	186		152.9	219.4	221.6		156.4	235.8	193.3		152.1	228.3	172.1
370	147.2	200.2	197.1		150.6	209.9	229.3		159	237.5	194.8		152.6	229.7	173.4
371	147.2	199.8	182.6		150.2	216	223.3		156.6	238	192.9		152.4	232.3	178.5
372	146.8	198.2	175.6		152	210.1	222.8		158.2	239.9	193.4		150.3	229.7	173.9
373	147.4	202.2	189.6		150.8	210.2	232.1		156.7	239.6	195.8		153.3	227.1	171.2
374	148	207.9	190		153.9	216	228.8		160.7	238.3	194.9		152.2	225.9	175.6
375	146.5	200.1	187.1		148.6	215.2	223.4		158.3	237.9	193.5		152.2	242.1	172.2
376	146.2	196.6	187		151.5	213.2	229		160.8	238.7	193.6		151.5	233.3	174.4
377	147	198.8	183.5		151.9	213.5	232.8		163.8	236.8	199		153.6	221.6	174.3
378	146.7	199	188		152.1	207	233.5		157.1	242.5	194.2		153.8	232.6	174.6
379	148.8	198.9	194.2		148.8	207.9	234.8		163.4	241.4	191.8		151.1	234.6	173.6
380	146.4	196.2	179.2		149.6	218.6	234.6		160.3	244.9	191.1		152.7	224.1	173.1
381	147.7	202.8	182.5		148.5	209.6	236.1		161.4	250.8	194.5		154.2	236.9	178.9
382	145.3	202.8	183.5		151.8	206.6	231.9		159.8	246.1	193		152.1	231.6	176.4
383	145.9	199	187		150.3	206.1	231.4		159.8	247	195.3		151.9	228.6	176.1
384	147.3	190.6	177.6		152	209.1	225.9		160.5	246.1	194		150.3	239.2	172.3
385	147.3	196.4	185.8		148.7	213.4	225.8		161.4	250.9	194.9		150.7	226.8	175.5
386	148.2	199.1	186.9		150.5	212.2	235.6		157.4	254.3	193.3		151.2	228.5	173.6
387	148.3	200.1	179.5		150.3	200.5	232.4		162.5	256.2	192.8		152.5	229.5	173.6
388	148.7	194	189.9		150.4	204.9	229.2		161.8	260.1	192.5		150.2	236.8	176.9
389	147.7	202.9	180.9		152.2	210.8	230.1		162.4	256.8	196.6		149.3	227.6	173.1
390	149.5	205.5	184.1		148.9	216.2	228.8		161.4	262.2	187.8		151	229.9	175.6
391	146.6	193.1	184.6		150.3	211	231.1		158.1	257.6	194.9		151.8	233.2	173
392	147.6	200.2	183.5		150.7	214.1	226.8		160.4	260.3	193.3		151.1	227.2	175.5
393	147.1	199.8	180.8		149.5	215.4	230.9		161	263.9	195.2		152.8	224.8	174.1
394	146.9	203.8	185		151.2	212.2	229.9		163	262.9	192		151	225.2	172.5
395	147.2	202.6	179.5		153.3	211.1	237.4		160.2	268.8	192.9		151.8	232.2	171.6
396	147.4	198.5	189.9		150.5	216.2	234.2		161.2	265.1	194.5		150.4	236.2	172.6
397	146.7	198.1	181.5		150.8	217.9	235		162.7	267.9	196.1		150.4	229.1	173.1
398	148	197.4	177.6		151.6	209.6	232.6		166	265.9	193.2		151.4	228.9	171.4
399	147.5	190.6	189.2		149.3	209.9	229.3		161.1	264.4	193		150.7	234.7	172.7
400	147.2	202.2	182.9		150.3	213.9	229.7		163.6	259	193.1		151.5	225.4	170
401	147.2	199.1	180.2		150.1	204	240.5		160.7	254.3	192.4		150.3	230.3	170.5
402	149	202.5	191.6		150.4	209.9	234.4		164	254.7	192.2		149.9	226	171.8
403	147.5	200.5	183.2		151.2	208.6	244.9		163.5	260.7	187.6		152.2	229.6	170.7
404	150.6	201.9	185.5		151.6	211.2	242.6		160.1	254.1	194.2		151.4	230.5	170.8
405	149.2	197	185.1		151.6	208.1	245.9		162.5	258.3	192.2		149.4	234.2	170.2
406	146.5	200	181.6		151	205.2	242.2		165.8	253.1	190.2		151.1	228.8	170.8
407	145.7	195.9	185.1		150.1	203.8	235.6		162.7	250.5	193		151.3	230.5	170.4
408	146.4	196.5	178.8		148.6	210.6	248.8		161	255.4	190.2		149.8	228.8	170
409	146.6	197.2	186.9		149.5	210.4	246.6		163	248.6	193		149.8	228.6	170.7
410	147.8	196.1	186.6		148.7	206.4	253.4		160.1	251.1	191		150.3	231.3	169.4
411	147.7	200.8	190.1		147.1	211.9	241.2		161.1	248.7	195.4		151.4	228.7	168.5
412	148.9	196.9	195.6		149.9	208.2	245.9		161.8	246.6	190.1		149.4	226.5	169.8
413	148.8	196.6	180.8		149.8	212.9	245.7		159.2	245.9	194.3		149.8	227.2	172.7
414	149	201.4	192.8		151.6	207.8	245.2		161.1	243.2	190.4		148.7	226.5	166.3
415	147.7	201	187.9		150.1	213.9	240.3		161.7	243.6	192.6		149.1	227.9	169.5
416	146.3	208.5	191.9		148.2	210.9	247.4		158.3	241.5	193.4		150.4	224.3	171
417	147.3	207.4	183.1		151.4	214.6	240.7		159.1	240.1	190.7		149.3	228.5	168.1
418	149.3	204.1	184.1		149	201.5	235.1		160.5	239.2	190.6		150.1	230.5	169.7
419	146	190.9	191.9		150.4	209	236.8		160.4	245.8	194.8		149	225.5	169.3
420	146.7	194.2	185.8		148.1	201.6	240.5		159.7	242.8	191.9		152.3	223.9	166.9
421	147.4	206.9	186.8		151.5	204.9	231.6		158.9	243.8	189.8		153.2	231.9	168.9
422	148.6	201.4	189.9		148.3	216.2	232		161.3	245.3	193.7		150.5	228.9	166.7
423	145.9	196.8	185.6		147.9	204.1	227.2		161.8	238.2	193.5		152.7	230.1	167.1
424	148.5	204.9	188.4		153.2	203.5	223.1		161.7	240	193.7		150.3	228.6	168.2
425	147.2	209.9	187.5		148.6	205.8	224.2		162.2	240.6	193.5		151.7	223.8	165.3
426	148.3	196.1	182		149.5	199.8	221.6		162.6	243.2	189.6		150.2	222.5	169.5
427	149.5	213.5	187.2		150.8	210.8	215.3		162.7	240	194.5		149.9	228.4	168.8
428	148.1	202	189.2		153.4	209.8	217.7		162.8	241.8	193.8		149.5	225.4	169.5
429	148.6	205.4	191		151.3	211.6	218.6		162.9	244.5	192.9		154.3	230.1	166.9
430	145.7	203.2	183.9		149.3	213	214.4		161.3	246.7	190.5		149.4	219.7	169.9
431	148.9	188.6	186.9		151.2	206.6	209.1		163.3	244.3	194.2		151.2	232.3	166.4
432	145.3	198.9	190.8		152	210.1	209.8		159.5	243.3	195.7		151.4	222.7	169.2
433	146.8	203.2	203		150	202.5	203.3		166.2	237.8	190.9		152.2	228.8	168.2
434	147.3	199.5	188		151.7	200.5	206.1		161.2	244.8	195.4		151.3	230.4	167.2
435	146.4	197.1	195.9		152.5	217.2	206.4		165.5	238.8	192.8		150.8	223.2	171.1
436	147.9	205.2	192.9		150.2	213.4	206.6		159.9	240.5	194.6		150.1	229.1	169.3
437	147	196.1	195.4		148.4	214.2	199.8		162.2	240.3	193.4		151.1	222.8	165.2
438	146.5	208.1	189.1		151	205	198.2		160	237.8	192.5		149.9	226.1	164.7
439	146.9	197.9	195.4		148.1	205.8	201.9		162.1	240.3	192.8		150.1	224.9	170.4
440	146.3	202.8	196		150.6	201.5	196.4		162	235.8	194.5		150.9	224.6	170.7
441	147.7	207.1	197.5		149.4	216.1	200.1		159.4	235.9	195.3		150.7	229.8	165.1
442	147.8	193.5	199.2		152.2	206.2	195.6		161.7	236.8	191.5		153.8	221	166.8
443	147.7	202.9	199		150.8	208.6	187.3		160.9	232.9	194.6		153.1	226.2	166.7
444	147	197	190.2		149.8	209.2	195		158.6	237	191.9		150.5	224.7	164.8
445	146.4	210.2	188.5		148.8	200.1	194.6		160.9	234.8	195		151.3	225	168.5
446	149.2	201	200.6		150.5	207	189.5		162.4	239.8	193.1		151.1	226.2	164.7
447	149.7	194.9	194.5		149.7	205.4	194		162.3	239.2	192.6		152.5	227.2	169.2
448	146.9	200.6	198.4		150.9	210.8	187.8		164.2	239.3	195.4		149.9	225.9	165
449	148.7	198.6	198.9		150	203.2	192		160.2	238.3	193		152.6	225	170.6
450	145.6	194	191.9		151.8	211.4	188.1		160.5	238.3	194		150.9	223.7	168.6
451	146.7	198.4	192.9		148.3	205.1	192.2		162.8	242.2	196.9		151.7	224.3	166.9
452	147.2	199.1	195		145.2	206.2	184.8		163.1	239.4	192.6		150.9	221.6	169.1
453	145.9	206.1	195.1		148.4	207.4	191.1		163.6	241.9	190.7		150.8	222.6	165.4
454	147.4	205.6	192.4		149.5	195.6	185.4		160.6	246.8	192.5		151.6	223.8	167.2
455	147.6	206.4	190.6		148.5	201.5	183.8		158.3	241.2	195.2		150.7	226.7	168.1
456	146.5	200.6	192.4		151.1	207.6	186.1		160.7	243.3	193.5		152.1	226.6	169.5
457	148.1	202.1	197.2		151.1	202	183.2		163.5	245	196.9		152	228.5	170.1
458	147.7	199.9	190.8		149.5	200.9	186.2		160.6	243.5	194.8		151.5	225.2	169
459	147.5	201	188.6		143.8	200.8	188.7		162.2	243.1	194.3		151.3	223.9	163.2
460	146.1	200.1	189		148.4	208	187.3		160.6	243.1	191.9		152.4	227.5	169.5
461	146.2	200.9	193		150.7	197.9	189.6		159.1	240.2	192.1		152.5	221.6	167.2
462	147.8	197	197.2		149.7	202.8	188.4		160.4	241.6	193.8		152.5	230.6	165.8
463	146.7	207	199.8		151.2	201.9	190.9		160.5	241.7	192.9		151.2	231.5	163.7
464	145.4	196	199.6		150.1	205.2	189.6		159.6	239.2	191.3		151.2	225.5	166.5
465	146.7	194.4	196.1		150.9	207	188.4		164.1	235.7	191.1		152.4	221.2	167
466	147.3	198.2	197.9		148.6	197.9	190.4		159.3	245.8	188.9		150.8	231.9	167.3
467	146.7	190.5	199.9		146.4	203.2	179.8		162.7	243.6	191		152	225.4	167.2
468	146.2	199.9	209.5		151.3	199.6	186.3		162.8	241.8	191.7		152.7	228.5	165.4
469	145.8	199	200.9		148.6	199.1	192.8		161.1	241.9	190.1		153.1	219.7	165
470	148.3	199.6	198.6		150.2	204.6	186.8		159.8	240.5	191.1		150.6	228	166.1
471	147.6	199.5	211.4		150.6	195.1	183.5		159.5	242.8	191.2		152.2	222.3	167.6
472	147	197.1	198.9		145.9	204	188.8		157.8	244.1	190.4		152.3	220.8	167.7
473	147.6	195.1	206.5		147.4	203.2	184.6		160	244.8	193.1		151.8	221.8	164.6
474	148.5	198.9	212.1		146.6	196.4	183.1		159.2	244	192.1		150.5	225.1	163.3
475	147.5	204.5	202.4		149.2	203.9	180		162.2	237	190.3		152	222.6	164.6
476	147	196.5	205.2		149	202.4	182.2		161.7	242.1	195.3		152.3	219.4	159.2
477	149	204.8	206.9		147.4	200	185.9		161.4	243.3	196		151.1	221.5	165.4
478	146.8	197.5	208.8		148.3	195.9	177.6		161.2	238.4	192.3		151.6	224.4	165.6
479	146.4	196.6	202.6		148.3	198.8	183.4		162.1	243.4	193.4		151.5	224.1	164.9
480	147.9	199.8	204.4		145.7	203.6	179.6		160.6	244.1	195.4		153.6	224	165.1
481	147	195.4	200.1		146.9	198.4	181.4		159.7	246	195.9		153.8	217.2	166.7
482	147.9	201.8	208.1		147.8	201.8	178.5		161.2	242	192.4		150.7	223.1	163.8
483	147.6	202.2	210		148.2	203	179.1		160.7	243.8	194.8		152.8	226.5	164.2
484	148.8	202	199.4		148.9	199.6	174.4		158.2	242.4	190.9		150.7	226.2	164.4
485	148.1	206.4	202.6		146	198	174.4		161.8	244.2	197		151.1	224.2	165.3
486	147.8	197.8	202.8		147.2	196.5	175.2		164.5	237.2	193.9		150.8	223.2	164.8
487	146.5	193.9	202.9		149.3	197.9	178.2		160.1	241.2	195.6		149.9	226.1	166.5
488	147.4	197	202.9		148.6	206	178.1		160.8	242.1	195.4		150	228.1	169.9
489	146.3	204.9	204		147.5	204.8	173.3		160.5	245.1	196		150.7	231	168.3
490	148	203.9	206.9		148.4	202.9	174.7		161.3	239.6	192.9		152.1	223.4	165.1
491	146.9	201.8	198.6		148.7	205.2	177.2		161.2	242.5	195.5		150.5	225.4	166.8
492	146.4	201.8	200		146.8	203.2	177.7		161.8	240.9	197.1		152.1	225.7	171
493	146.2	195.1	199		147.6	202.8	177.8		163	243.8	197.5		151.3	227.9	171.9
494	146	194.5	200.9		151.2	197.6	180.1		159.9	245.1	195.9		153.4	226.2	169.5
495	147.1	197.6	202.9		147.5	205.9	178.6		162.7	237.5	196.1		151.8	227.9	169.5
496	145.1	191	194.2		149.2	199.2	176.9		162.1	246.3	198.7		151.4	224.8	170.3
497	146.7	203.8	191.4		147.2	202	173.2		161	246	196.2		150.6	223.4	169.4
498	148.5	203.1	191.1		148.8	201.2	174.8		162.1	244.2	197.8		150.3	226.5	172.2
499	147	198.5	199.1		148.6	207.1	173.5		156.2	248.1	193.8		152.2	222.9	172.9
500	148.2	198.1	199.6		146.6	192.8	178.8		162.7	241.2	195.8		152.7	224.8	172.1
501	149.1	199.9	190.2		148	200	174.3		164.8	240.4	197.4		150.8	229.5	173.6
502	146.6	199.5	185.2		150.9	200.1	175.9		164.6	238.8	197.1		152.9	228.9	168.3
503	147.8	201.5	191.6		148	200	176.1		161.2	243.6	195.9		150.9	228.9	173.2
504	147	198.8	192		146.4	204.5	179.9		161.5	239.4	196.7		150.4	228.2	169.9
505	147.8	200.6	188.8		148	196.1	180.2		163.2	242.1	191.8		152.1	221.4	171.7
506	147.6	191	189.6		148.1	205.8	176.4		162.7	246.2	199.1		152.6	226.7	166.8
507	147.4	200.4	187.6		149.8	196.6	184.9		161.7	247.7	194.9		150.8	224.9	170.8
508	146.9	200.4	184.4		147.9	204.1	183.9		161.3	241.3	192.6		148.4	224.4	171
509	146.7	196.9	187.6		148.6	200.1	179.6		161.1	245.9	197.6		152	226.6	171.7
510	147.5	200.9	190.6		146.9	199.9	189.1		165.6	239.6	196.8		152	225.4	169.4
511	149	196.9	185		148.8	202.6	188.7		161.2	235.4	195.8		152.6	223.1	172.7
512	148.7	208.2	189.5		148.1	195.5	185.2		161.5	237.6	198.7		150	222.6	172.6
513	148.8	197.6	191.8		151.3	208.1	188.4		161.3	240.6	198.6		149.4	225.5	165.4
514	148.7	207.2	184.2		148	201.2	186.8		159.2	242.1	195.7		150.9	225.5	166.4
515	149.9	201.4	194.2		146.4	197.4	187.3		163.2	237.8	194.9		150.1	230.5	169.4
516	147.5	202.5	184.1		147.3	193	185.8		163.7	246.6	199		151.5	227.4	168.6
517	146.2	201.8	183.1		148.3	194	184.4		159.9	240.4	200.4		150.3	221.1	169.6
518	147.2	197.6	186.9		148.3	200.9	185.9		161.2	243.6	195.5		152.6	223.9	166.2
519	148.9	201.9	181.2		147.8	197.2	186.3		162.2	238.8	195.4		152.3	224.6	165.7
520	145.6	198.9	177.5		145.6	197.6	184.8		159.5	238.1	199.3		151.5	226.4	172.2
521	146.6	198	185.9		148.6	210.1	185.6		161.1	242.6	197.8		148.6	225.2	165.3
522	147.6	198.5	186.1		146.9	195.4	187.5		164.2	239.5	198.8		150.8	225.8	170.6
523	146.4	200	180.2		148.8	199.1	189.1		162.3	237	198.3		150.2	219.9	170.4
524	147.8	198.2	182		148.4	204.2	186.4		164.9	237.7	198.7		150.2	225.5	168.2
525	146	191	189.6		146.9	200.1	191.6		161.5	238.7	204.1		150.9	221.2	166
526	146.3	197.4	184.5		150.1	203.1	182		162.2	236	202.2		151.9	223.5	168.9
527	148.4	204.8	186.8		149.3	202.2	186.6		162.1	238.5	207.4		151.4	226.8	169.6
528	148.6	201.4	183.1		147.4	204.5	187.2		164.3	233.4	201.8		150.5	224.1	169.4
529	148.5	207.6	181.4		149.7	207	183.8		164	235.2	204		151.4	223.8	170
530	146.5	205.5	185.1		147	199	186.8		159.8	240	202.4		151.1	224	171.5
531	148.6	191	178.8		147.4	206.9	184.1		163.2	232.2	206.2		152.5	225.6	176.3
532	146.5	201.1	177.4		149.6	204.1	182.2		160.9	236.5	208.5		153.7	227.4	172.4
533	146.8	199.2	178.5		150.9	212.9	183.3		162.7	237	204		150.1	228.8	167.9
534	146.8	199.2	181.9		149.5	214.5	183.9		162.5	233.9	203.8		151.3	229.4	168.1
535	147.2	200.6	175.2		149.3	204.9	181.4		160.7	239.4	210.8		152.8	229.2	171.1
536	145.8	202.9	178.5		148.4	202.2	183.9		163.8	231.7	204.6		153.5	227.1	169.2
537	146	190.1	169.1		146.7	217.1	178.9		161.2	240.6	205.9		149.9	224.1	170.4
538	146.4	196.5	176.4		149.6	207.1	184.4		161.1	236.6	204		153	225.6	171.6
539	147.5	196.2	179.9		154	205.1	184.2		161.5	237.7	209		152	224.5	167.4
540	147.1	196.2	172.5		147.6	210.5	178.4		163.5	238.9	208.8		151.4	224.1	169.9
541	146.6	199.8	174		152.9	211.2	182.8		161.6	240.7	205.1		151.5	225.1	171.9
542	147.7	206.9	179.1		149.2	203.2	174.6		163.6	231.1	206.2		151.2	224.4	166
543	148.1	199.1	174.1		150.4	207.5	182.1		162.4	242	207.3		152.2	223.1	169
544	148.5	201.2	183.1		149.9	207	179.7		162.9	232.8	200.7		151	224.6	169.4
545	147.5	200.1	176.2		151.1	209.2	184.9		161.3	236.2	204.5		151.9	221.5	170.4
546	146.6	194.8	189.6		151.8	214	180		164.7	234.6	204.2		150.6	218.5	171.8
547	146.5	196.9	174.5		148.9	210.2	178.8		161.4	237.2	206.7		152.1	226.7	171.5
548	148	211.5	183.2		151.7	202.1	174.3		160.5	235.6	200.6		150.7	226.2	169.6
549	147.5	192.6	172.1		150.5	212.5	183.1		164.5	239	201.9		150.1	222.1	172.3
550	148.9	200.6	174.8		148.8	201.5	181.1		160.5	238	203.7		152.5	223.8	170.5
551	147.4	197.1	173.5		148	213.6	180.9		161.2	234.4	201.4		151.1	229	170.5
552	146.4	203.2	174.9		149.7	212.8	180.6		161.2	238.3	203.2		150.5	220.7	172.1
553	147.8	203	178.4		150.8	207.8	185.9		161.1	233.2	205.5		151.7	225	168.8
554	147.5	199.8	176.9		147.5	205.5	182.9		162.7	236.3	201.2		150.4	222.8	171.4
555	147	199.8	180.1		147.9	208.1	180.2		164.7	235.5	209.5		150.4	225.8	174.3
556	148.2	203.9	183		152.4	211.4	185.7		163.7	233.4	208.1		152	229.7	171.4
557	148.1	201.9	177.6		149.2	204.4	184.2		159.9	234.2	205.8		152.7	225.2	172.1
558	146.6	196.4	182.2		149.4	204	181.6		161.4	238.9	206.5		150.9	228.2	171.4
559	148	201	185.4		148.7	219	187.6		159.7	235.5	204.4		151.2	224.1	170.6
560	148.1	197.9	183.8		149.7	206.6	182.2		160.6	237.2	203.1		151.7	217.9	171.9
561	149.4	191.8	187		151	211.1	188.6		162.7	237.4	205.8		152.6	225.8	173.3
562	148.3	201.4	183.5		148.6	216.6	187.8		161.1	240.9	206.8		151.5	223.4	170.3
563	148.4	197.5	182.8		150.9	204.1	187.2		161.7	236.8	205.5		150.4	224	173.8
564	147.8	204.4	192.9		150.7	213.8	181.8		163.2	236.7	208.3		150.1	219.1	174.7
565	148.8	208.8	185.9		148.9	208.1	175.1		161.2	239.9	207.2		152.4	222.3	172.1
566	148.5	201.2	189.8		149.7	210.8	183.3		159.4	237.4	209.7		152.5	218.2	173.3
567	147.2	195	194.1		149.8	206.2	178.8		161.5	235.2	204.4		151.2	228.3	169.9
568	148.1	203.8	187		148.8	205.2	183.9		161.7	245.8	210.4		151.6	222.3	169.8
569	149.4	200.5	192.8		149.1	204.9	175.7		159.9	238.8	208.4		150.3	224.5	171.1
570	148.7	205.1	191.6		149.7	206.8	176.4		160.2	242.8	210		150.3	229.3	172.1
571	147.2	211	189.1		149.4	208.1	180.9		160.7	242.8	210.6		150.4	223.2	169.9
572	147.6	195.2	186.6		147.6	212.1	181.3		161	251.8	211.2		150	228	168.8
573	147	198	183.1		150.6	208.1	176.9		159.2	238.9	212.2		151.3	224	172.4
574	148.4	198.9	187.4		150.4	205.6	175.4		161.5	250.8	210		150.9	220.9	168.8
575	145.9	199	188.6		150.8	201.4	178.8		161	247.5	209		151.3	220.8	171.1
576	146.7	204.8	182.4		148.5	206.1	177.5		162.6	247.4	206.9		151.1	225.1	172.2
577	147.9	198.2	186.2		151.1	200.9	177.3		162.8	251.1	213.5		150	221.1	168.2
578	146.9	202.1	193.8		148.8	218.6	175.4		161.7	247.3	210.5		149.8	218.8	171.5
579	148.4	201.5	194		150.4	207.4	174.3		164.5	250.3	209.7		152.3	225.2	170.3
580	148.7	204.4	193.1		150.5	209.5	170.3		161.1	249.3	213.2		151.7	224.2	172.3
581	145.3	201.6	187		150	204.2	175		165.6	248.2	206.8		152.1	227	170.8
582	146.6	204.1	182		149.8	204	175.4		164.8	250.4	205.8		152.4	219.2	167.1
583	147	209.5	190.1		149	204.5	171.2		163.5	254.4	210.3		152.2	228.6	171.8
584	148	196.6	190.8		149.5	204.9	174.7		161.9	253.7	206.7		153	222.1	171.7
585	147.6	200.6	189.9		148	198.9	172		163.7	255.2	212.1		151.8	218.9	171.6
586	148.1	215.5	194.8		149.9	208.2	171.1		163.2	253.4	209.1		150.9	225.9	171.5
587	147.4	206.9	185.2		149.4	199.4	172.5		164.3	254.2	205.2		151.8	227.1	170.5
588	147.4	210.4	196.4		149.7	203.6	174.4		159.9	249.4	205.3		150.3	223.6	170.5
589	147.6	200.1	189.9		148.8	210.5	170.8		164.5	254.1	204.8		153.6	222.7	171.3
590	148.5	205.2	185		148.9	207.8	174.9		164.5	245.2	204.7		153.2	224.2	171.9
591	146.3	205	174.8		148.4	205.8	172.4		163.9	250.2	206.4		152.2	226.3	169.8
592	148.7	199.8	188.1		149.9	212.9	171.1		159.6	247.5	205.3		152	223.7	170.4
593	148	204.1	189.2		151.8	203.8	169.6		164.4	245.4	202.7		151.8	229.7	169.4
594	149.5	207.5	180.6		150.9	205.2	170.4		162	245.2	195.6		153.1	222.6	169.8
595	145.8	204.9	186.2		151	201.4	172.8		161.1	242.6	200.4		152.3	219.7	167.5
596	147	202.5	189		150.8	202.8	172.1		160.5	237.3	194.9		152	229.1	171.5
597	144.8	200.2	183.5		150.5	208.1	174.3		161.2	247.4	200		152.1	221.6	171.6
598	146.4	203.5	177		152.8	203	171.8		158.5	241	198.9		151	223.1	167.5
599	149.9	201.9	184.4		151.9	210.8	172.1		162.8	244.7	200.4		151.1	217.5	171.1
600	148.3	212.1	182.9		152.3	206.8	172.8		158.4	239.3	199.3		151.9	224.8	170.7
601	146.1	199.5	187.6		149.7	206.5	169.9		157.6	241.6	193.8		151.2	220.5	169.1
602	147	200.1	177.9		151.4	213.4	169.4		160.3	240.3	199.8		150.5	221.8	166.9
603	147.7	197.6	186.1		153.3	215.4	173.6		162.1	248.2	199.2		150	222.2	169.4
604	148.9	204	184.9		151.9	217.5	173.5		160.4	238.7	195.5		151.9	217.4	168.9
605	146.6	209.2	181.9		149.8	211.6	170.2		162.9	249.3	198.5		150.1	222.5	167.8
606	148.7	204.2	186.2		151.2	211.9	174.7		160.7	242	194.3		151	220.6	170.3
607	147.1	196.2	186.1		148.2	214.4	166.4		161.2	245.8	195.7		152	224.1	167.4
608	148.4	204.2	183.2		150.8	212.2	170.9		160.8	243.4	193.3		150.4	217.4	168.2
609	148.6	211	189.5		151.2	212.2	173.4		160.2	241.7	195.6		152.4	222.8	166.7
610	148.5	211.4	183.5		150.4	215.2	173.3		158.8	248.2	192.4		149.6	219	168
611	148.2	204.5	184.8		152.1	210.8	171.3		161.3	239.5	190.9		153.5	229.4	167.5
612	148.8	205.5	184.1		148.6	219.5	168.5		162.2	245.9	195.6		150.9	225.5	169.1
613	147.9	204.2	184.6		152.6	209.4	169.6		161.4	240.3	193.8		150.8	220.9	168.1
614	145.5	207.5	193.8		146.6	217.4	169.6		163	241.9	190.6		151.5	223.5	169.1
615	146.9	210.1	187.8		152.4	204.9	170.7		160.8	246.7	191.9		150.8	221.3	167.9
616	149.2	195.5	183		150	212.1	169.9		158	239.8	190.6		151.9	222.3	167
617	150.6	206.9	183.5		148.8	211.9	171.4		163.1	247.7	194.9		149.9	222.2	165.5
618	146.5	202.5	191		149.9	208.4	170.9		163	238.2	192.3		150.4	223.3	167.4
619	149	199.2	189.8		149.1	209.4	171.1		162.9	236.4	192.1		150	230.1	167.9
620	147.6	213.8	184		150.2	211	172.9		162.7	243.6	194.3		150.4	224.2	164
621	146.2	202.4	184.5		152.9	210.5	174.6		162.3	234.8	191		151.9	216.5	168
622	149	203.8	188.5		148.1	218.9	175.1		160.2	245	192.8		149.5	222.1	167.7
623	146.6	201.6	195.8		149.4	210.1	174.4		159.5	246.5	194.1		150.4	217.4	168.8
624	148.9	203.9	193.5		150.2	213.5	171.1		160.8	244.8	194		151	232.9	164.9
625	147.2	205.2	190.9		151.6	212.6	174.1		163.8	239	192.8		151.1	222.8	164.2
626	146.4	206	192.4		148.2	206.9	176.8		161.1	241.8	196.8		150.5	223.8	168
627	147.3	199.2	189.5		151.5	217.8	180.2		162.2	246	190.7		151.2	221.6	165.4
628	145.7	202.9	179.8		149.9	222.1	174		165.2	246	193.2		150.9	221.2	164.3
629	147.9	202.8	186.4		150.3	209	172.1		164.9	249.9	191.4		152.5	224.8	164.7
630	149.1	208.9	182		150.6	216.9	170.8		162.4	244.8	191.3		150.2	228.8	165.6
631	148.4	199.2	194.4		151.2	209.5	174.3		166	245.1	195.2		150.7	227.1	165.1
632	147.6	206.4	183.6		148.4	215	172.9		163.5	250.3	193.8		150	230.6	167.1
633	147.2	199.2	184.8		151.2	216.6	175.1		162.8	252.6	192.9		152.4	227.1	162
634	147.9	205.4	186.1		147	209.8	171.2		161.8	250.6	194.7		152.8	229.9	165.2
635	147.7	209.8	174		149.9	212.4	172.9		165.8	248.7	194.8		149.9	228.9	164.6
636	147	198.1	180.1		147.9	207.1	173.6		164	247.8	193.8		149.8	223.3	163.8
637	146.3	195.9	196.8		149.6	211.1	173.7		163.4	252.2	194.1		150.6	222.9	164
638	148.6	206.1	189.9		152.2	198.9	172.3		164.4	250.6	196.4		149.5	221.2	167.1
639	147.6	205.6	175.2		149.1	205.6	174.3		159.7	246.3	195.8		150.2	226.5	164.3
640	146.4	199.2	181.5		150.7	206	176.2		163.6	250.9	192.4		150.5	226.9	165.4
641	149.4	212.4	176.1		149	212.5	174.7		167.9	249.8	195.1		152.2	233.3	166.4
642	145.6	208	183		150.8	200.8	172		164.5	252.4	195		151.9	230.8	168.4
643	148.4	200.6	185		148	209.2	172.9		164.2	250.6	193.6		150.3	231	166.5
644	147.4	198.4	181.4		151.1	217.2	171.4		163.4	254	194.4		151.4	221.6	165.1
645	146.5	208	176.9		152.9	206.6	170.7		163.8	248.9	191.2		151.6	226.9	167.3
646	148.9	199.6	177.2		151.4	213.8	173.2		161.3	253.3	191.2		153.6	229.1	165.8
647	146.9	195	182.4		154.1	208.2	173.5		163.8	250.2	189.3		151.4	224.1	168
648	146.2	204.6	185.2		150.8	215.5	172.5		163.7	247	187.8		151.5	232.6	166.9
649	148.7	206	181.4		150.2	210.5	174.1		164.1	249.1	189.4		150.9	229.9	169.2
650	146.7	196.2	186.8		150.1	212.1	176		165.8	248.2	189.6		150.6	225.4	166.7
651	148.2	203.1	190.6		148.4	206.1	171.9		162.5	247.8	190.9		150.3	228.9	167.6
652	148.4	201.4	182.5		150.6	203.8	173.1		163.4	242.2	187.1		150.2	231.2	167.8
653	147.9	198.6	187.2		150.2	207.2	173.2		165.2	247.6	194.4		151.3	227.2	168
654	145.9	204.5	181		149.4	207.5	170.9		162.6	245.5	188.2		154	233.4	166.2
655	148	204.1	191.5		148.6	208.4	171.6		165.9	243.2	189.8		151.9	229	170.6
656	147.2	193.8	183		149.4	202.4	170.6		163	244.8	189.7		151.3	223.2	165
657	147.7	196.6	189.9		148.3	206.1	173.3		160.2	241.8	189.5		152	228.1	166.5
658	146.6	203.1	187.4		152.1	208.4	167.8		162.9	242.5	186.5		151.7	228.1	166.4
659	145.3	200.8	185		147.7	198.8	168.6		159.2	246.1	188.1		153.8	230.4	166.6
660	148.7	205	189.5		149.8	210.9	172		163.8	239.5	186.1		153.2	226	167.5
661	146.9	198.5	187.9		151.2	205.6	165.9		160.1	243.1	186.3		150.8	232.9	166.2
662	146.4	202.4	181		148.6	210	170.7		160.4	239.8	183.9		153.1	224.3	169.1
663	148.1	206	193		150.9	209.5	169		165.3	247.8	188.1		152.1	227.5	168.7
664	146.1	203.1	184.8		149.5	210.1	171.3		162.9	246.1	183.9		152.6	230.8	166.6
665	146.9	197.9	188.4		149.7	198.9	176.1		161.9	244.7	190.4		152.5	227.1	167.4
666	146.3	196.4	183.4		148.4	205.4	177.4		159.4	246.3	186.7		151.8	224.4	167.8
667	147.7	204	182.4		147.8	200.1	171.1		162.4	242.3	182.7		151.9	227.5	169.8
668	147.6	200	189.5		148.2	204	171.6		164.9	241.8	183.1		152.9	226.9	168.1
669	147	209.1	191.4		147.8	205.2	169.8		162.1	240.7	187.4		152.5	224.8	167.8
670	148	193	183.2		150	210.8	171.6		161.6	239.9	184.5		151.1	229.6	169.4
671	147.9	203.9	185.6		149.7	203.4	169.2		163.5	236	186.9		152.1	236.8	169.6
672	148.3	199.6	183		150.4	209.8	167		161.5	236.3	187.6		150.1	222.9	168.6
673	145.2	200.2	178.1		150.6	203.4	170.5		163.2	237	183.8		151.5	228.9	169.3
674	147	196.9	185		149	205.5	170.5		161.6	231	183.9		151	230.4	172.6
675	147.1	201.2	184.9		150.3	204	174.4		160.6	235.8	181.4		152.4	227.4	170.1
676	147.1	198.5	188.1		149.8	201.2	167.4		161.4	240.1	182.6		149.6	225.2	170.2
677	145.2	195.9	188.1		147.6	200.5	168.6		164.2	238.3	182.3		151.8	222.9	169.4
678	146.3	204.1	179.8		149.6	203.4	166.1		161.6	240.8	182.5		152.1	226.5	170.8
679	147.6	202.1	185.9		149	202.2	167.8		164.1	235.5	182.6		152.8	231.7	173.5
680	146.5	189.8	183.2		149.4	206.6	169.6		164.2	238.4	180.8		151	227.5	169.4
681	146.8	209.4	182.1		147.1	204.4	172.3		163.2	246.9	180.8		153.9	228.4	174.5
682	145.6	197.9	187.5		148.6	197.2	170.3		164.4	239.6	185.3		151.9	229.6	174.1
683	145.7	203.2	177.2		149.5	189.4	172.1		161.4	240.4	185.1		152	223.5	170.1
684	147.5	195	184.8		148.5	201.8	168.3		165.8	241.3	182.2		152.5	223.3	174.1
685	145.4	204.2	182		146.2	198.1	171.7		162.7	243.9	181.5		151.3	229.2	172.3
686	147.2	202.1	177.4		149.9	204.6	173.2		163.8	241	182.6		152.5	225.5	170.5
687	146.4	197.4	188.5		150.8	200.2	171.9		164	239	180.5		151.1	226.2	169.6
688	144	190	184.2		150.6	201.8	169.8		161.1	238.6	176.8		151.9	224.4	170.9
689	147	201.6	181		151.6	199.9	168.4		163.9	243.1	179.2		151.5	225.2	173.9
690	145.7	199.5	189.5		149.3	203.6	175.1		162.6	237.2	181.9		152.4	222.8	169.9
691	146.2	203.5	179.4		145.9	198.5	169		161.9	234.1	181.9		152	228.1	172.3
692	146.1	203.9	178.4		147.9	204.6	166.2		161	241.4	180.5		150.1	220.8	175.6
693	146.5	202.9	180.1		148	196.1	172.8		163	242.9	182.2		152.1	235.3	171.1
694	147	201.2	183.6		147.6	205.5	171.2		161	242.1	181.3		150.3	225.9	171.3
695	146.1	208.4	182.1		150.7	205.2	171.6		162.8	238.6	178.6		153.1	224.8	172.4
696	148.3	197.6	183.2		149.4	201.1	170		163	237.5	180.2		150.9	217.2	175.4
697	146.9	200.6	183.1		146.9	199	167.8		162.9	239.3	180.7		151.6	224.8	173.1
698	145.7	202.6	179		149.4	200.6	169.7		162.2	238	179.1		151.4	228.8	171.1
699	146.3	205.5	179.9		149.4	205	170.2		163	237.6	178.2		151.1	226.4	171
700	148.8	206.8	188.5		145.7	206.5	170.2		164.4	238.8	181.1		149.7	223.9	168.9
701	147.4	206.4	184.5		146.5	200.2	168.6		161.1	240.9	183.2		152.1	221	172.6
702	148.5	210.2	190.5		145.9	203.8	172.5		163.3	241.1	181.8		148.7	227	173.1
703	148.8	203.8	177.6		149	201.2	166.2		163.4	247.5	184.5		151.8	223.1	166.5
704	147.2	201.6	177.4		147	202	169.2		161.8	243.8	185.7		151.7	224.8	173.3
705	145.3	197.6	183		147.5	201.4	164.6		160	245.3	184		151.2	221.9	171.1
706	149.3	197.2	181.4		147.4	204.2	169.1		162.4	252.8	186.1		150.6	221.7	170.1
707	145.8	198.1	185.8		144.9	194.6	169.1		162	247	186.8		151.3	222.2	171.7
708	147	200.6	186.8		149.1	199.4	170.3		161.2	254.9	181.9		150.3	226.7	172.1
709	145.4	208	180.2		146.8	200.4	171.2		164.9	252.3	186.6		150.3	226.9	171.6
710	146.3	200.8	178.8		149.4	207.5	167.2		163.1	248.2	185.6		151.8	224.3	172.4
711	146.3	200.9	185.1		147.2	194.1	172.5		161.2	252.7	187		150.1	226.8	172.3
712	148.6	208.1	176.6		149.3	204.5	175.8		160.7	253	183.8		150.5	224.4	173.5
713	147.5	205	178.1		148.9	199.2	169.2		159.3	250.8	185.2		152.3	225.4	173.3
714	148.2	199.6	179		149.2	200.2	173.4		162.2	246.3	183.6		151.4	223.9	171.1
715	146.4	209.1	186.9		149.2	196.9	170.5		163.3	252	185.5		151.6	222.5	176.4
716	147.6	203	183.2		146.4	194.5	170.9		159.2	245.2	184.9		151.7	227.8	175.6
717	146.8	208.8	186.5		146.1	200	172.1		161.2	241.2	183.5		151.4	231.1	171
718	144.6	199.2	174.8		148.7	193.6	169.2		162.7	240.6	182.4		152.2	225.9	173.4
719	146.9	199.8	183.5		149.8	196.4	170		156.4	239.4	182.9		152.8	226.2	172
720	147.3	204	182.2		150.2	191.2	173.9		159.9	240.2	179		150.1	221.8	174.9
721	147.1	208.5	177.6		148.3	198	173.8		160.4	248.4	178.8		152.2	225.8	172.5
722	147.3	203.8	183.2		149.6	199.2	169.5		160.4	234.7	181.7		150.9	215.7	176.6
723	148.8	201.1	181.1		145.6	204	168.4		161.1	243.8	181.9		151.4	225.1	172.2
724	146.4	203.5	182.9		147.4	198.5	170.9		160.6	242.4	177.4		150.2	230.2	174.2
725	146.7	197.9	182.6		148.4	197.9	170.8		160.3	242	179.8		150.5	229.3	173.1
726	147.7	202.8	185.6		147.8	198.4	166.5		163.4	243.3	180.4		150	223.6	173.3
727	146.6	200.4	189.6		145.8	193.8	169.7		162	245.7	178.1		151.5	224.7	170.6
728	147.4	201	190.2		148.8	192.1	164.8		160.8	236.2	184.1		150.6	226.9	172.3
729	146.7	205	185		149.9	202.1	169.6		160.9	238.3	180.6		151.2	232.4	173.4
730	148.1	199.9	189.1		149.1	201	167.1		159.5	237	176.7		149.6	223.1	170.3
731	146.7	201	195		148.4	194.9	168.8		160.3	237.6	178.6		149	229.2	169.4
732	148.6	205.2	191.4		149.9	195.4	168.1		157.9	239.6	174.4		149.7	225.9	169.3
733	147.7	202.2	193.2		149.1	197.2	164.6		160.2	237.6	177.2		149.3	228.7	171
734	148.7	205.5	195.1		150.1	194.5	172		157.5	238.8	177.5		148.3	227.1	170.9
735	147.8	196.2	201		150.3	196.6	165.6		162.9	238.4	181.6		151.7	223.7	171.6
736	148.2	201.6	199.5		149.5	197	166.2		164.1	237.1	181.2		150.7	221.8	171.4
737	147.3	203.4	197.6		149.4	197.9	166.4		159.5	236.7	176.5		148.3	224.1	168.6
738	148.5	205.1	197.8		149.3	191.6	168.4		160.9	240.3	174.1		150.6	228.7	171.1
739	148.2	205.4	208		150	194.6	168.6		161	235.6	175.6		152.5	220.1	172.2
740	148.1	199.1	198.6		150.2	198.6	166.5		161.8	240.3	175.6		149.9	221.9	169.8
741	147.8	197.9	202.9		150.5	193.4	172		157.5	244.5	174.9		150.6	225.6	169.9
742	147.6	202.4	208.5		147.8	205.2	175.7		159.8	232.2	177.7		150.1	228.8	172.3
743	149.4	201.9	194		148.4	201.6	170.1		162.2	237.4	177.7		150.9	222.3	167.8
744	147.4	201.1	196.6		150.4	203.9	173.4		158.9	236.9	178.7		151.6	226.8	171.7
745	146.6	208.2	208.4		149.7	201	173.4		161	232	175.4		149	227.7	168.6
746	147.9	198.4	201		150.9	203	174.5		160.3	240.4	175.9		149.4	221.9	168.4
747	149.1	200.8	199.2		151	199.2	169.5		160.8	244.5	176.6		149.4	226.4	168.3
748	148	204.4	200.1		150.9	200.4	168.8		163.5	240.5	175.8		151.4	224.3	166.7
749	147	200	201.1		150.5	205	175.3		162	240.4	178.3		148.9	230.3	168.3
750	147	193.8	206.1		149.6	207.4	166.2		162.8	248.7	177.9		149.9	226.2	165.5
751	146.1	201.9	198.6		150.2	196.1	175.6		158.7	244.9	174.4		150.8	220.2	167.3
752	148.9	196.5	201.1		149.4	194.4	168.8		162.1	243.6	175		149.9	224.6	170.7
753	146.8	202.8	208.5		151	198.5	168		161.3	241.1	174.8		149.4	224.1	167.9
754	147.3	207.5	204.6		149.3	198.9	171		159.7	243	173.1		150.2	227.4	169.3
755	148.2	195.6	206.6		151.1	209.9	172.8		162.2	249.2	178		151.6	225.8	169.3
756	147.3	210.2	212.1		149.1	199.8	174.4		161.5	246.8	176.3		150.9	221.5	166.7
757	147.4	203	210.5		151	198.2	176.3		160.7	241.1	171		152.2	230.7	166.5
758	147.5	200.6	203.9		149.4	199.5	173.4		159.6	247.3	172.2		148.6	222.5	168.3
759	147.6	200.9	202.9		152.8	203.1	174.7		164.2	242.6	173.1		153.2	230.3	172.4
760	148.4	197.9	209.6		149.5	198.9	174.5		160	240.1	171.5		151.8	222.5	168.3
761	148	205.5	208		151.2	199.9	173.6		161.7	241.5	174.2		151.3	223.8	167.8
762	147	201.2	199.8		150.2	204.4	173.3		160.5	241	167.8		151	228.2	165.2
763	148.4	199.4	200.4		150.3	202.8	175.1		161.6	232.1	176.7		149.8	227.5	168.1
764	147.6	202.2	202.5		150.2	203.8	169.8		160.9	238.3	174.9		150.6	226.8	166.9
765	147.7	199.9	205.8		153.4	199.6	174.1		159.2	239.2	170.3		147.5	224.9	171.1
766	146.9	205.9	203.9		151.4	198.9	175.1		162.8	233.1	175.1		150.2	230.1	166.3
767	147.2	215.4	202.1		150.8	202.1	176.8		160.5	241.2	174.1		150.9	220.6	163.9
768	148.6	200.2	210.1		150.4	197.4	174.1		159.8	237	174		149.1	216.5	167.2
769	146.8	198	200.1		152.3	206.1	178.1		158.1	241.2	172.3		151.4	220.3	168
770	146.2	192.9	202.9		150.5	207	175.6		160.4	235	174.6		147.7	225.6	169.4
771	144.5	206.1	204.5		151.8	203.9	177.2		160.7	243.6	175.6		151.1	224.9	166.9
772	146.5	200.4	205.4		152.3	201.8	173.4		157.6	236.9	175.5		149.1	222.2	168.6
773	147.6	201.5	200.6		149.8	205.1	174.6		160	239.5	177		151.3	217.1	166.2
774	146.5	202.5	200.1		148.6	196.5	175.3		159.2	231.8	176.1		151.4	220.4	163.7
775	147.6	204.2	194.5		151.3	190.1	170.6		161.2	238.9	174.1		150.9	220.9	167
776	146.9	202	194.9		148	199.6	173.2		158.5	237.6	173.3		150.7	224.5	168.5
777	146.8	206.1	192.9		150.8	195.8	172.5		158.4	235	173.8		151.5	228.9	169.4
778	146.3	198.8	204.6		148.6	200.4	177.2		160.3	237.8	174.5		147.5	227.1	167.4
779	149.5	196.2	193		148.8	200.9	169.8		161.2	233.2	175.7		150.4	226.6	168.8
780	144.4	196.5	196.6		150.4	193.6	175.5		159.7	233.1	174.6		150.5	221.7	165.1
781	147.7	196.9	204.1		148.4	203.5	177.4		159.4	238	176.8		150.8	224.9	167
782	147.3	196.9	198.6		149.9	208	174.4		164.3	235.4	174.6		152.1	226.6	164
783	149.5	202.9	196.6		154.1	191.5	171.7		161.6	239.2	175		150.5	226.1	168.6
784	147.9	191.6	199.8		150.5	198.9	174.7		162.5	237.8	176.8		150.9	225.1	167.2
785	149.3	192.6	199		149.5	196.2	170.6		162.4	235.4	174.7		149.2	220.7	166.1
786	146.5	198	194.6		148.8	194	172.5		161.6	238.8	176.1		150.1	226.4	168.3
787	145.4	202.8	198.5		149.9	203.9	172.1		161.7	234.9	172.8		150.5	215.9	167.9
788	147.2	194.2	206.1		146.1	192.6	169.2		163.8	241.8	175.5		149.4	225.7	167.6
789	147.4	198.6	206.2		146.9	192.4	171.3		160.8	236.1	173.7		150.8	228.2	169.2
790	146.8	204	201.9		146	187.6	172.2		162	237.7	175.6		149.7	221.8	168.3
791	147.9	204.2	202.1		147.2	196.2	174.6		162.2	236.7	179.9		147.9	228.7	171.9
792	146.5	197.2	202.1		147.7	191.2	173.2		160.4	230.9	177.4		150.8	223.6	170.8
793	149.5	190.1	206.9		149.4	203.8	170.8		160.9	235.9	175.8		150.3	227.7	172.4
794	148	205	208.6		147.5	188.8	170.4		163.2	237.9	177.4		150.9	227.3	170.7
795	147.7	201.4	211.8		149.4	189.4	172.6		164.1	240.5	175.8		149.6	226.8	168.1
796	147.7	198.2	210		148.4	188.4	172.2		162.1	240.8	178.9		149.2	223.2	173.7
797	146.7	196.1	201.1		147.1	191	169.1		162.9	241.8	177.9		150.1	224.5	173.1
798	147.5	191.9	213.2		145.2	205	173.8		159.2	240	175.6		149.5	226.6	174.3
799	148	197.9	210.2		147.9	189.8	171.6		161.8	240.9	177.7		149.2	225.8	174.4
800	147.8	199.8	211.9		146.6	201.9	171.8		160.7	240.6	175.5		150.4	221.1	175.6
801	148.1	202.1	207.8		149.6	194.4	174.2		165.3	239.7	176.6		150.1	219.9	176.6
802	148.5	202.5	202.4		147.5	199.1	169.8		164.7	239.4	177.8		149.3	221.7	174.9
803	147.1	197.5	203.2		148	201.5	171.7		162.9	237.7	173.9		148.8	223.3	175.5
804	148.3	204.1	204.1		145.7	194.8	168.8		162.4	237.2	172.9		148.7	219.9	176.2
805	147.3	198	203		147.1	193	172.5		160.5	239.8	176.2		149.7	221.9	175.9
806	147	201.9	198.4		148.1	200.6	176.7		163.8	238.4	173.8		148.7	220.8	175.5
807	147.6	199.2	201.4		148.4	201.1	173.8		163.8	241.7	173.8		151.5	216.3	172.4
808	147.7	196	196		147.7	197.8	175.9		162.9	239.8	173.9		149.8	226.1	176.1
809	145.7	204.6	197.4		148.8	189.8	174.9		161.8	238.3	176.3		149.6	219.9	174.9
810	147.5	200	191		146.1	197.4	170.2		162.7	236.5	172.3		148.4	224.4	169
811	148.4	197	198.6		147.1	195.2	177.1		161.2	235.1	171.9		150.3	220.7	176.9
812	146.8	198.4	196		149.1	202.6	173.8		161.5	240.8	175.8		151.1	221.6	172.9
813	146.4	202.2	196		151.3	190.9	177.9		163.2	239.5	178.9		150.9	222	174.1
814	147.7	198.9	201.8		146.4	203.4	176.1		161	247.9	176.7		149.7	223.1	172.1
815	147.6	202.8	195.4		146.5	199	174.4		164.3	243.7	177.6		149.5	216.9	175.2
816	148.9	195.2	192.2		146.6	200.5	178.9		164.4	241.4	177.3		149	220.7	172.5
817	148.3	199.2	189.9		148.3	198.1	177.8		164.1	241.7	178.8		150.3	220.7	176.4
818	146.8	201.4	187.4		147.9	196.2	182.1		164.5	242.6	171.9		148.6	220.9	174.8
819	147	207.1	188.9		148.7	195.9	176.8		163.6	245	178.2		150.4	224.2	173.5
820	148	204.4	192.5		148	193.4	174.2		160.4	251.1	182.2		150.4	222.3	174.1
821	145.9	201.9	189.5		146.4	202	171.9		162.1	245.3	176.8		151.5	224.2	177.3
822	148.5	200.4	194.5		148.4	194.4	174.6		163.2	243.2	179.4		150.1	222.9	174.1
823	145.3	202.6	182.4		146.6	197.2	172		162	247.1	179.4		150.7	224.4	171.4
824	146.8	202.1	186		149.7	188.8	176.4		160.7	250.3	182		148.9	218.4	173.8
825	147.7	191.8	193.4		147.8	201.2	174.4		166	246.3	181.8		151.4	222.9	173.9
826	145.9	196.8	186.1		147.8	200.8	171.3		163.9	252.8	183.8		149.5	220.9	173.9
827	146.7	196.5	180.8		146.6	193.4	168.9		161.6	252.3	183.1		151.7	221.6	172.4
828	147.1	197.5	181.9		146.9	196.8	175.1		162.4	259.7	179.2		149.4	220.9	175.9
829	147	195.2	192		146.5	195.1	171.1		162.5	252.4	184.1		151.3	229.1	175.8
830	146.1	204.9	186		147.6	199	169.6		163.2	255.5	184.2		150.3	224.6	172.3
831	146.7	195.6	178.8		146.8	195.2	167.6		162.6	257.8	188.1		148.8	223	175.6
832	145.8	206.9	185.8		149.4	188.4	171.5		164.2	256.3	180.3		149.6	223.9	172.9
833	145.7	197.1	182.8		147.7	202.9	172.9		165.5	256.6	186.7		149.7	223	175.1
834	148.7	207.9	189.2		148.2	199.2	173.8		163.6	258.7	186.8		149.4	223.5	170.7
835	148	199.9	184.2		148.6	196.5	171.9		166.5	258.2	183.2		151.2	220.7	172.9
836	145.1	193.1	182.4		147.4	200.1	168.8		164.6	255.3	182.5		149.1	221.6	173.3
837	144.2	199	184.2		147.5	200.4	166.6		166	259.4	184.9		150.6	224.2	171.2
838	147.1	202.5	189.1		147.9	198.6	167.6		166	258.7	186.5		151.3	227.4	169.4
839	147.1	200.8	181.2		150.2	190.5	168.1		166.4	255.6	187.7		149.7	217.2	173.3
840	146.8	201.4	191		148.1	192.1	166.8		166.1	255.2	186.5		150.4	221.1	170.2
841	146.7	198.1	185.5		147	195.9	173.6		165.6	259.3	185.9		151.7	226.4	170.4
842	148	196.1	183.6		147.4	194.8	164.2		164.3	261.1	187.4		149.7	218.2	171.6
843	147.4	207.1	190.4		149.1	195.1	169.8		164	261.2	184.9		149.8	223.3	169.7
844	147.3	197.4	186.5		147.3	202	173.4		163.3	257	186.1		149.9	225.2	169
845	147.2	202.4	185.5		147.9	194.6	163.2		165.4	259.2	185.3		150.6	224.4	168
846	147.7	195.8	191		146.8	193.6	168.5		162.2	259.9	189.8		150.8	219.4	170.1
847	149	200.5	190.9		148.4	199.2	172.6		162.9	262.8	189.4		146.5	222.1	167.4
848	145.5	193.8	183.2		150.6	197.6	166.8		163.1	260.7	186.7		147.9	222.9	168.6
849	147.3	198.8	187.5		147.2	191.9	169		163.6	265	190.1		148.2	218.6	166.4
850	149.3	193.5	190.2		148.9	200.2	173.3		162	262.3	189.6		150.8	226	165.6
851	147.4	197.8	190.6		146.2	189.8	164.2		162.7	259.1	191.8		149.3	219.5	168.2
852	147.2	200.2	187.4		144.6	195.1	168.4		162.4	256.9	186.3		150.7	222.9	167.6
853	147.7	193.5	192.1		147.2	195.9	172.4		164	255.3	190.7		149.6	226.6	165.9
854	147.9	198.6	188.8		146.7	195.4	162.6		161.1	258.6	193.3		148.9	223.8	169
855	145.6	199.6	179.4		147.2	195.9	163.6		162.2	260.7	192.8		149.7	219.5	167.8
856	145.2	202.8	185		147.1	195.8	169.8		163.7	257	194.6		149.8	222.5	168
857	145.5	197.6	186.4		147.3	197	164.3		164.4	253.3	195.8		148.9	219.4	165.2
858	148.3	196.9	187.2		148	200.9	169.1		162.3	252.7	196		149.6	227.1	165.1
859	145.4	201.2	185.5		148.1	193.9	168.9		163.5	252.3	195		150.4	221.9	165.7
860	146.1	200.5	180.6		146.9	196.2	166.1		166.1	254	194.4		150.9	221.8	165.5
861	146.8	193.9	185		147.8	198.4	167.9		163.2	257.7	195.8		150.4	228.9	167.7
862	149.7	203	185.9		145.4	188.6	168		166.9	252.2	195.1		148.4	218.9	168.6
863	147.4	202.1	184.6		146.2	199.2	168.8		165.5	253	194.3		149.4	228.5	169.4
864	146.4	197	182.6		146.3	194.4	172.5		163.2	257.7	198.8		149.4	218.2	169.3
865	146.1	203.6	182.4		147	193.5	166.7		165	253.5	197.2		151.1	226.3	165.6
866	146.3	191.9	186.9		147.9	193.6	173.1		164.2	254.7	198.2		150	220.2	168.2
867	147.3	198.1	189.2		148	192.1	165.1		164.8	249	200.8		147.6	213.6	167.7
868	147.1	202	186.8		144.7	200.5	162.2		164.8	250.9	197.8		148.7	227.5	170.6
869	147.5	197	180.4		145.8	203.6	169.2		164.3	254.7	197.4		148.5	219.5	169.3
870	147.6	200.8	185.2		146.4	188.1	165.4		160.7	250.2	202.9		151.9	218.4	171.3
871	147.4	199.9	187.5		148.1	201.5	161.4		166.2	256.1	196.7		148.8	218.6	172.5
872	146.7	203.1	190.9		145.3	202.1	173.1		160.5	254.9	199		150.1	226.1	172.9
873	146.3	199.9	181.8		147.2	197.6	159.1		161.8	252.8	199.8		149.2	223.6	172.6
874	145.7	202.6	185.1		145.3	196.5	166.4		164	257	201.6		148.8	218.9	170.2
875	148.6	198.1	188.1		147.8	194.4	165		164.4	257.8	201.8		150.1	220.8	174
876	147.2	201.4	182.4		145.2	192.1	164.6		164.8	254.8	200.1		150.3	228.3	177.4
877	144.4	200.9	193.8		146.1	194.6	165.9		163.2	257	202.6		150	224	172.1
878	148.2	198.1	181.2		143.5	196.5	166.6		164.8	260.2	205.4		147.7	220.7	176.7
879	146	193.9	186.9		146	198.6	166.9		167.2	257	205.4		151.6	227.4	172.4
880	146.2	199.1	185.2		147.4	190.6	169.4		168.1	256.7	200.8		148.5	221.1	175.9
881	148.2	195.5	187.5		147.2	194.6	165.6		166.6	262	205.8		149.3	212.7	176.8
882	148.7	200.6	191.4		145.3	190.8	166.2		164.2	258.4	206.9		151.1	216.7	172.6
883	149.5	208.4	190.2		148.9	198.1	168.8		164.5	257.9	203.1		150.5	222.8	175.1
884	146.7	203	190.1		145.9	195	169.7		161	259.2	205.7		151.4	231.5	174.9
885	144.1	207	188.9		145.1	197.4	168.9		168.9	255.4	202.5		151.4	223.9	174.5
886	147.3	198	189.6		145.6	192.9	164.9		169.5	265.9	204.4		150.8	216.7	176.4
887	148.5	194.2	190.8		145.8	192.9	170		164.1	259.6	202.8		152.2	226.9	175.4
888	146.9	195.6	193.2		147.6	195.5	165.1		170	263.2	201.9		151.6	222.1	177.4
889	146.9	193.4	182.2		146.5	194.4	170.2		165.4	256.8	196		151	228.5	177.8
890	147.8	200.2	191.2		144.1	186.4	165.1		164.5	255.8	202.7		150.7	221.8	178.7
891	145.9	203.2	192		149	197.1	169.4		164.8	258.3	204.2		148.7	227.9	180.3
892	145.5	201	192.5		148.2	192.6	171.6		165.2	254.8	200.2		150.6	225.1	179.3
893	147.1	195.2	197.1		146.1	190.5	168.4		164.3	256.2	199.5		150.2	224.3	175.5
894	148.1	201.8	200		150	200	170.6		164.8	254.5	203.5		149.8	225.1	179.3
895	148.7	199.8	202.8		147.4	192.6	170.7		166.4	253.4	198.4		150.3	225	175.6
896	148.2	193	197.9		146.7	194.9	170.1		161.7	259.2	201.2		150.5	219.4	177.6
897	146.7	199.8	191.6		147.2	198.5	170.9		165.2	251.5	201.2		151.8	219.2	180
898	146	193	196.2		149.2	191.2	175.2		160.4	255.1	200.9		148.4	225.8	177.4
899	144.8	193.9	197.4		146.6	192.9	173.4		164.8	255.2	200.6		150.3	229.4	176.1
900	147.5	202.8	194.6		146.9	189.9	171.3		163.8	252.1	203.6		149.6	226.6	178.3
901	147.8	201.6	191		144.2	188.6	174.4		166.6	252.5	200.4		151	226.4	174.6
902	146	198.1	195.4		148.6	192.8	174		165.6	251	199.2		150.4	225.1	177.1
903	146.2	200.6	199.8		146	188.5	169.5		169.6	264.3	207.4		149.2	225.1	180.4
904	148.1	196.2	200.9		144.8	187.8	180		167.2	257	206.3		152.3	228.2	178.1
905	147.2	203.5	195.8		147.3	190	170.2		169.2	265.5	203.5		150.7	218.2	176.4
906	146.8	195.8	189.8		150.2	186.5	172.8		164.8	293.7	202		150.6	222.5	174.7
907	147.9	202.6	194.4		145.9	193.2	175.1		167.8	268.4	207		150.4	224.6	179.1
908	147	192.4	194.8		146.7	193.1	172		171.8	275.5	214.5		151.4	224	178.5
909	148.2	192.1	192.9		144.6	190.6	181.5		163.1	271.8	213.4		149.5	225.1	178.8
910	148	200.2	200.6		145.4	200.6	178.1		167.4	279.4	210.9		148.9	225.5	179.6
911	148.6	205.9	197.4		144.6	187.1	177.9		165.9	311.7	216.2		147.3	225.9	175.2
912	147.7	201.8	197.8		147.6	191.5	172.9		169.5	277.9	214.8		150.9	218.5	174.1
913	146.8	196.5	196.8		149.6	194.6	176.7		170	279.8	214.1		151.3	223.7	174.4
914	146.1	199.8	193.6		146.5	192.1	175.2		167.1	278.8	220		151.1	226	173.5
915	147.1	203	199.4		149.8	199.4	175.7		166.8	279.8	214		149.4	216.9	177.3
916	147.3	197.2	194.6		148.6	195.8	177.7		167.4	276.8	214.7		150.3	224.7	173.5
917	148.6	194.2	189.9		148.9	198.6	172.6		169.4	277.5	220.2		150.9	220.4	172.7
918	147.8	196.2	193.8		149.1	191.4	176.5		167.1	278	220.8		148.6	214.5	176.8
919	147.2	200.1	195.2		145	189.2	177		167.2	276	221.2		149.4	223.9	174.4
920	148.7	203	191.6		146.7	185.6	177.4		166.8	275.6	216.2		151.8	220.7	174.6
921	146.9	200.6	201.8		150.2	192.1	173.9		168.2	277.1	218		149.4	224.7	178
922	148.1	197	197.1		147.4	194.6	177.3		166	278.4	220.9		150.3	220.9	175.1
923	146.9	202	198.5		147.5	199.9	178.4		166.6	270.9	218.6		151.2	219	176.9
924	144	192.2	193.9		148.1	187.5	178.3		167.9	267.8	220		149.1	224.9	175.4
925	148.3	200.5	206.8		147.8	195.4	180		167	266.2	220.1		150.5	219.3	172.1
926	149.6	196.9	201.4		147.9	194.1	176.4		167.6	268.7	222.9		149.1	227.4	174
927	147.6	195.5	195		146.1	191.9	179.9		165.7	266.1	226.4		150.6	220.9	170.6
928	147.7	194.4	198.1		148.2	188.8	172		165.9	276.4	231.9		150.4	222.5	172.6
929	148.3	207	199.4		148.6	196.4	177.8		166.7	266.7	222.4		151	222.6	173.6
930	147	202.8	197.2		146.5	194.2	174.6		167	268.5	225.2		149.1	224.4	170.6
931	145.8	206.1	201.4		150.7	189.2	174.1		164.9	268.4	222.1		151.3	223.5	173.1
932	146.7	206.8	194.8		147.2	195.5	179.9		164.4	263.1	220.9		149.8	226.2	172.8
933	147	199.5	195.6		146.6	197.6	179.9		165.9	264.9	232.2		148.1	223.6	169.1
934	148.7	200.1	192.6		147.9	196.9	182.9		161.8	262.7	226.3		151.8	217	169.6
935	149.9	198.1	204.6		146.3	197	182.8		163.9	259.9	231.9		149.8	217.8	170.4
936	148.5	198.2	196.2		147.2	188.5	184.1		165.1	264.1	223.6		150.9	226.8	165.9
937	148.7	200.6	200.8		148.8	192.9	185.7		165.8	267.4	232.1		148.2	224.9	165.6
938	147.6	202.9	200.2		145.7	192.4	181		166.3	259.9	231.9		151.6	223.9	170.7
939	148	198.2	191.1		146.8	192.5	185.4		167.8	260.1	235.1		150.1	226.4	166.1
940	146.4	202.1	201.5		147.8	196	186.8		162.9	259.2	230.4		148.3	227.2	168.9
941	147.1	201	197.6		145.2	184.8	190.6		164.2	252.3	234.3		148.9	225.4	168.6
942	146.9	199.5	193		145.7	192.6	191.3		163.8	261.8	240.1		152.1	224.5	167.2
943	146.9	201.6	196.5		148.2	184	186.8		166.2	255.1	237.8		150.3	222.6	169.1
944	147	199	203.8		147.3	192	194.1		162.3	253.5	240.5		150.1	219.4	169.5
945	146.5	202.6	197.9		145.2	190.8	191.4		161.6	252	239.7		150	226.6	171.3
946	146.9	198.1	191.1		147.2	194.2	191.8		166.1	254	242.5		149.4	225.1	168.3
947	148.1	191.5	193.6		146.3	198.5	188.4		164	254.7	242.8		149.6	223.2	166.8
948	148.9	198.8	186.6		145.1	186.8	192.5		163.8	247.7	244.3		148.5	221.8	169
949	148.1	205	196		146.2	194.4	191.7		162.2	252.3	243.5		150.7	221.6	169.8
950	147.5	201.2	201.1		146.1	188.4	192.6		162.1	245.9	238		149.4	230.6	163.5
951	146.9	201.9	189.4		147.7	193	192.7		163.3	245.2	245.4		150.8	221.9	169.5
952	146.8	208.8	196.2		145	186.4	187.8		160.6	249	244.9		150.4	225.4	169.2
953	145.4	198.9	198.2		145.2	188.9	189.7		162.9	250.6	243.4		149.9	223.2	167.6
954	147.2	203.4	196.5		146.9	195.2	184.2		162.5	249.2	247.4		149	224.1	166.3
955	147.7	198.1	191.8		150	189.1	190.2		160.9	246.1	248.9		149	226.4	167.4
956	147.7	195	198		147.3	193.2	183.4		161.4	244.3	245.9		150.6	225.7	168.2
957	147.3	202.6	189.5		147.9	194	187.2		164	248.2	248.9		153.5	229.4	167.5
958	148.6	197.5	191.8		144.9	195.8	189.6		165	243.5	250.9		151.6	230.4	169.7
959	149.3	198.1	190.8		145.8	194.9	183.4		166.6	247	248.3		149.9	227.7	169.3
960	144.3	197.9	188.5		146.3	194.2	184.6		162.3	248.4	249.3		151.7	227.4	167.4
961	147.7	200.8	190		146.8	187.1	181.9		161.1	245.8	249		151.3	226.1	165.8
962	147.7	200.8	186.1		147.4	195	178.8		165	248.1	245.2		151.3	233	166.7
963	147.4	191.1	191.1		147.2	191.9	182.4		165.8	244.1	244.8		148.5	224	168.1
964	145.5	202.8	180.2		147	189.9	184.3		160.5	247.8	248		149.2	228.8	167.5
965	146.6	203.5	187.6		145.4	189.6	183.2		164.8	243.5	245.8		149.1	230.6	169.2
966	147.5	198	185.4		148.6	188.2	186.5		161.3	248	245.4		149	240.2	168.9
967	146.7	205.8	187.1		147.8	197.8	185		162.2	253.2	252.7		147.6	228.5	169.4
968	146.7	203.8	194.4		146.4	196.5	176.9		163.5	244.7	246.6		151.3	233.2	168.4
969	147.1	197.2	191		145.4	189.9	179.4		161.8	248.9	251.5		153.8	230.5	168.1
970	148	200.9	190.9		145.9	197.2	183.1		160.5	246.3	251.7		152.8	223.5	169.2
971	145.6	200.1	182.1		147.6	186.6	178.2		161.7	242	243.6		150.3	232.8	166.5
972	144.3	202.8	185.1		144.7	192.9	184.6		163.9	246.5	250.8		151.6	229.8	168.6
973	148.5	198.9	186.2		147.4	196.8	181.4		159.9	247.3	245.6		151.8	233.7	168.8
974	147.4	202	188.2		147	193.5	182.9		162.2	242.5	243.8		151.4	233.9	166.3
975	147.9	191.8	184.8		147.1	190.2	180.4		160.4	248.3	251.3		149.7	236.7	168.2
976	147.8	203.6	182.6		145.7	202.4	179		160.6	251.8	252.7		151.9	234.6	167.6
977	147.2	193.9	182.9		147.8	196.2	178.3		158.2	239.5	246.2		148.7	233.4	170.5
978	148	198.6	191.8		148.9	194	184.9		163.5	242.2	246.2		152	233.9	172
979	148.4	197.6	181.6		147	196.5	177.9		160.3	241.2	249.6		152.1	230.5	174.1
980	148.4	204.6	186.5		146.4	189.1	180.8		161.6	242.2	250.6		153.3	229.2	171.1
981	147.2	199.6	187.8		150.1	192	181.9		165	238.6	243.8		152	228.4	172.7
982	146.8	203.8	181.1		144.5	193.4	174		163.2	246.5	251.7		153	229.6	171.9
983	148	200.4	181.4		147	191.5	176.7		162.4	245.4	245.2		151.6	234.3	171.4
984	148.7	205.2	180.9		149.7	193.9	177.3		158.9	242.6	246.4		154	238.6	172.6
985	148.4	197.2	186.4		148.8	190.6	177.3		163.8	244.5	243.2		153.5	232.1	169.8
986	144.7	196.5	178		144.4	192.5	183.8		161	248	247.5		150.9	229.2	169.8
987	145	210.5	181.5		145.1	184.1	176.9		164.8	244.8	248		149.9	232.4	171.7
988	146.8	192.6	183.8		147.9	193.9	181.8		160	247.6	243.1		151.9	231.1	168.2
989	146.8	197.2	178.8		148.2	192.8	174.1		162.1	246.4	246		149.7	236.9	172.1
990	146.1	195.2	184.5		145.8	201.1	179.9		163.5	240.5	243.6		151.9	236.2	169.8
991	145.1	194.5	180		147.5	193.2	178		163.6	245.2	249.6		154.1	238.7	170
992	147.4	197	180.2		144.7	190	176.1		162.2	240.7	246		151.4	235.5	172.1
993	146.9	197.2	183.9		145.8	191.6	178.7		162.5	244	245.2		152.4	234.6	169.8
994	146.7	201	182.6		148.7	193.4	177.1		159.4	247.1	241.7		151.6	236.2	169.7
995	146.8	202	188.2		144	184.9	171.1		160.2	246	246.9		151.8	233.2	171.9
996	149.3	204.9	183.2		148.2	197.2	171.9		159.2	244.2	247.6		150.6	229.4	170.7
997	148.4	190.2	178.6		147.2	193.4	177.8		160.6	242.4	244.5		151.2	242.1	171.6
998	146.8	195.8	181.2		143.9	185.6	171.2		162.6	236.1	235.9		151.6	236	169.3
999	149	209.8	180.9		149.2	201.4	173.2		162.2	241.9	239		152.3	235.5	172.4
1000	147.6	195	188.8		147.2	195.1	172.8		163.4	243.4	233.7		151.7	235.9	169.8
1001	145.3	200.5	183		146.3	188.8	177.5		163.1	238.7	235		152.6	237.8	169
1002	146.1	198.8	179		146.5	198.8	171.1		162.7	239.1	243.8		153.2	231	168.9
1003	146.5	207	176.5		146.5	198.4	169.4		163	234.7	236.2		152.3	234.1	169.3
1004	147.7	195.8	183.4		146	189.5	175.2		161.2	241.5	240.4		152.8	231.4	170.5
1005	147.8	198.4	191.9		146.7	185	176.2		162.8	235.9	234.4		151.4	237.4	170.4
1006	145.6	198.5	179.6		145.9	195.5	177.2		157.9	238.5	238.2		153.3	231.7	168.8
1007	146.7	197.6	187.6		147.1	194.4	175.2		163.1	233.2	234		151.3	232.6	170.1
1008	145.8	194.8	186.1		145.8	183.6	177.2		161.6	236.7	237.8		153.7	230.8	170.5
1009	148.8	190.8	189.6		146.8	198.8	179.1		161.3	235.1	237.3		152.2	232.3	169.1
1010	147	206.8	184.2		145.4	191.6	179.6		161.1	228.3	230.2		149.9	235.7	167.1
1011	146.8	208.6	187.8		144.8	194.2	174.2		161.8	240.3	238.8		152.7	232.3	168.3
1012	146.7	201.1	186.6		147.2	192.1	184.4		162.1	240	234.8		152	233.3	172.8
1013	146.3	197.2	185		143.9	188.8	185.3		164.8	234.2	231.5		153.5	228.5	171.7
1014	148.9	205.1	181.4		145.3	191.8	179.2		162.8	237.5	231.2		151.2	225.1	173.5
1015	147.2	204.6	178.4		147.1	195.6	187.5		159.6	239	240.7		151.6	235.5	168.9
1016	146.8	198	197.9		144.5	196.1	184.2		161.5	238.9	232.4		153.2	227	169.2
1017	148.5	194.5	186		146.5	195.5	185.5		159.4	241.7	237.4		153.7	231.2	168.8
1018	147.3	200.4	195.4		144.1	196.8	184.1		158.9	235.3	241.5		149.8	233.5	173.4
1019	146.8	199.9	176.2		145.2	187.6	188.8		159.1	239.3	234.3		150.7	229.3	171
1020	147	203	184.5		147.8	204.1	193.1		161.5	236.2	234.8		154	234.1	171.8
1021	143.9	200.6	181.9		145	185.8	191.6		161.4	234	235.2		152.2	231.4	170.8
1022	148.8	195.8	186.4		142.3	193.4	189.4		158.5	236.1	240.1		154	228.2	169.8
1023	148.5	206.4	186		144.9	196.6	197.6		160.3	238	238		151.5	229.2	173.8
1024	145.9	196.2	186.1		145.6	199	194.5		160.8	236.6	230.4		154	226.1	172.1
1025	147.4	197.1	181.1		144.4	187.1	191.5		162.4	237.7	241.2		153.5	233.8	172.9
1026	147.1	205.9	170.9		145.1	191.6	197.9		160.2	238.3	242.6		155.3	227.1	174.4
1027	147.1	194.9	176.9		148.6	199.1	199.6		159.5	238.8	238.4		153.6	227.7	171.4
1028	147.2	200.5	178.6		147.3	189.4	200.6		159.7	239.5	239.8		150.3	221.5	171.3
1029	146.7	200	180.4		146.6	198.5	203.3		161	239.9	242		151.6	232.6	172
1030	147.2	195.1	180.4		146.3	190.5	198.9		159.7	242.5	237.3		150.1	229.8	171.4
1031	144.9	202.4	176.5		145.4	197.9	198.7		162.3	236.3	236.9		151.4	226.5	171.6
1032	147.8	194.5	178.2		144.3	188.8	200.1		162.2	239.1	239.8		152.4	226.7	171
1033	145.6	191.8	173.8		146.6	191	198.1		163.1	240.7	238.8		151.5	230.1	173
1034	147.3	198.2	186.8		148.4	200.9	203.8		161.9	243.9	233.1		149	222.6	170.3
1035	144.7	200.4	179.8		147.6	192.4	206.4		162.6	242.3	240.2		152.5	226.7	172.4
1036	149.4	200.5	177.2		148.1	206.5	204.1		159.9	243.4	236.6		150.5	226.5	173.6
1037	146.8	204.4	176.8		146.3	190.4	202.4		161.1	244.3	235.5		153	234.4	173.9
1038	148	197.1	171		145.9	196.5	201.9		160	244.8	239.9		150.3	234.7	171.8
1039	147.1	198	171.6		147.3	198.1	200.3		158.8	245.7	236.5		152.2	230.4	172.2
1040	145.7	200.8	180.4		146.2	187.1	195.6		158.8	242.1	237.3		152.6	231.8	169.6
1041	146.4	195.5	171.4		145.3	188.5	205		160.6	248.8	239.2		152.3	233.1	174.1
1042	146.8	196	175.5		147.6	192.6	202.4		162.3	238.1	238.8		152.4	225.9	171
1043	145.5	192	168.8		148.2	197.1	202.2		159	236.6	237		151.1	231.3	170.8
1044	143.8	198.6	172.9		147.1	197.5	207.1		161.1	239.4	232.7		151.7	225.1	175.9
1045	146.6	205	177		144.6	196.8	202.8		162.6	244	236.8		150.8	228.2	170.8
1046	148.6	198	170.8		146.2	192.4	200.6		156.9	240.3	236.5		152.8	231	174.6
1047	146.6	197.4	167.2		148.2	197.4	209.9		160.8	241.1	236.7		152.1	228.9	173.3
1048	146.9	199.1	168.4		144.7	190.5	202.5		160.2	235.5	234.4		152.2	225.6	174.2
1049	146.1	201.4	180.4		147.3	195	210.2		160.3	239.3	234.1		153.3	237.8	176
1050	146.7	197.1	169.1		146.3	188.4	205.6		163.2	240.4	238.8		151.6	231.6	171.7
1051	148	199.2	172.6		147.4	197.8	206.6		161.9	237.9	235		152.7	228.7	171.3
1052	147.3	206.6	167.4		145.9	192.9	206		163.8	238.5	235.4		152.8	236.9	173.6
1053	148.3	197.8	176.5		145.2	196.9	199.3		157.9	238.6	233.6		153.3	230	174.4
1054	145.2	198.1	169		144.9	191.8	199.8		160.9	242.6	231.3		151.2	233.5	170.9
1055	146.2	190	167.5		147.8	191.4	210.5		158.7	236.7	233.2		150.6	233.7	173.5
1056	144.8	201.1	167.5		147.3	192.2	202.1		161.2	233.7	231.9		151.4	225.1	170.6
1057	146.6	197.8	178.9		144.8	191.9	197.6		163.4	237.5	234.5		152.6	231.9	172.9
1058	146.3	195.5	168.2		143.6	195.9	205.7		164	239.5	231.9		152.8	232.5	174
1059	146.1	197.5	174.9		148.1	189	198.9		160.5	243.3	230.5		150.3	234.6	175.8
1060	145.6	203.1	171.1		146.3	189.6	197.6		160.4	236.2	235.3		151.4	235.1	173.8
1061	145.8	198.1	179.2		145.4	184.2	200.6		164.8	239.9	229.7		150.1	228.4	172.1
1062	146.1	204.4	176.8		143.8	192.8	194.5		164.2	236.8	225.9		149.2	235.9	172
1063	145.5	199	169.2		143.7	190.5	201.1		164.6	243.6	228.8		152	229.5	175.3
1064	148.2	195.8	169.4		146.4	193.2	198.1		162.4	237.9	226.7		149.6	235.7	177.8
1065	146.2	191	173.6		147.5	193.9	200.6		163	236.6	226.6		152.1	231.5	173.8
1066	146.1	198.1	168.8		146.4	189.6	199.4		161.7	238	231.2		152.7	228.3	175.2
1067	145.4	196.4	178.4		146.2	193	198.9		160.7	236.8	226.6		151.2	232.2	169.9
1068	147	199.9	172.9		144.5	193.6	197.1		160.5	233.8	225.6		149	231.1	175.5
1069	147.1	192.9	181.4		149.2	193.6	198.4		165.8	235	229.6		151	228.8	177.3
1070	147	201.4	179.4		147.8	185.8	196.7		159.7	237.5	228		151.2	231.6	170.5
1071	145.1	201.1	176.2		146.5	197	194.1		161.7	233.1	221.8		150	231.1	170.5
1072	147.5	189.6	173.5		145.1	193.8	195.6		166.5	236.9	228.9		152.3	232.2	176.2
1073	145.2	192.6	172.5		146.7	196.4	192.1		166.4	238.3	222		152.1	233	173.4
1074	146.3	196	176.8		144.6	194.9	190.5		161.1	239.9	225.9		150.8	230.5	172.3
1075	144.1	196.8	176.9		148.2	198.5	191.3		160.2	240.2	228.7		151.6	232.8	178.1
1076	146.2	201.2	179.4		146.8	190.2	190.2		161.6	244.1	226.9		153.4	234.9	173.1
1077	144.6	197.5	182.6		149.4	191.4	187.2		164.2	232.3	222.3		151.8	233.8	174.4
1078	145.4	196.4	175.8		145.1	201.5	195.6		161.1	236.9	216.7		154.4	234	173.6
1079	146.3	199.9	176.5		145.7	202	196.6		162.3	242.4	221.3		150.5	226.4	175.9
1080	149.3	192.1	180.8		145.6	197.9	199.3		159.6	237	220.2		152.6	228.9	170.6
1081	147.2	195.2	184.5		146.4	196.1	193.4		161.6	241.1	215.6		150.2	231.8	174.3
1082	147.1	196.9	181.1		145.8	197.1	193.7		160.3	243.1	211.9		151.7	235.9	173.8
1083	146.8	198.2	180.4		144.3	192	191.1		162.2	242.3	214.3		151.9	234.9	172.6
1084	148.5	202.6	182.6		146.4	195.5	190.8		159.6	239.7	208.2		151.3	236.9	170.8
1085	147.1	198.2	183.5		145.6	197.5	188.4		163.7	243.3	207.8		150.3	230.4	172.2
1086	147.8	200.1	181.4		144.2	190.6	188.8		163.4	242.7	206.6		150.9	236.6	171
1087	146.6	189.8	185		146	190.5	189.8		163.4	238.7	197.2		150.1	237.6	170.9
1088	147.1	200.4	184.6		149.6	200	190.2		159.4	242.3	202		151.2	230	174.6
1089	147.4	193.6	182.6		148.5	193.2	184.1		158.7	237.5	199.6		150.2	232.2	173.9
1090	147	200.4	188		146	194.5	187.1		163	245.5	200.5		149.6	231.6	172.9
1091	146.6	198.8	181.5		145.5	198.9	187.1		161.5	241.8	198.8		150	232.1	173.6
1092	144.9	204.8	186.8		145	201.1	185.1		162.2	251.8	194.8		150.7	239.9	172.1
1093	146.7	197.6	186.5		149.6	185.8	177.8		163.6	238.5	190.6		150	232.4	174.3
1094	144.3	194	186.2		144.4	195.9	184.5		162.1	239	189.5		149	237.1	170.6
1095	146.2	197.4	185.8		145.1	189.5	180.4		161.7	246.8	190.1		149.5	228.8	174.5
1096	146.8	196.8	179.5		146.4	192	182.7		160.7	244.2	190.4		150.3	229.9	173.2
1097	145.9	197.1	189.1		148.4	195	184.2		159.6	239.4	188.7		149.2	225.2	175
1098	146.1	199.2	179		145.4	196	180.4		160.6	244	186.8		149.9	232.8	172.7
1099	147.7	207.2	184.6		145.1	188.9	175.8		163	245.7	188.1		149.5	223.9	176.3
1100	146.1	205.9	187.4		147.8	192.9	174.9		160.6	241.4	185.1		151.8	236.3	174.8
1101	145.4	199.6	195.4		146.2	191.4	174.6		161.9	242.7	184		151.2	228.7	174.7
1102	148.2	199.6	186		144.8	188	176.7		161.1	239.5	184.3		149.4	232.1	173.1
1103	146.9	204.6	185.2		146.4	196.9	180.7		163.8	241.8	184.1		150	235.4	173.4
1104	147.9	199.5	186.4		147.3	191.9	172.2		164.3	243.8	182.6		150.6	227.1	176.4
1105	147.2	206.9	183.9		147.8	192.5	175.7		161.6	240.7	181.8		148.8	231.5	174.1
1106	146.3	201.9	181.1		147.7	194.5	173.2		162.4	242.2	182.5		149.7	232.2	174.7
1107	145.3	190.2	187.1		144.9	199.2	174.8		160.7	244.4	178.6		151.7	231.1	177.4
1108	146.7	202	188		145.3	195.2	174.2		161.6	238.8	178.7		150.8	230.6	173.7
1109	147.1	204.4	193.5		143.6	194.1	177.4		164.7	244.9	183.3		151.8	230.9	170.9
1110	147.4	209.2	196.9		145.1	189.9	170.7		157.8	243.9	178.9		150.8	231.1	176.2
1111	147.3	195.8	195.9		145	191.5	174.8		162.3	239.4	180.5		149.9	229.4	176.8
1112	146	195	197.9		146.9	192.5	176.4		160.6	233.4	175.5		149.1	230.8	173.1
1113	145.5	192.6	187.2		146	195.1	172.2		164.1	236.9	178		151.1	234.1	177.1
1114	145.7	208.9	192.8		144.4	198.2	175.6		160.9	240.6	174.9		150.1	233.1	172.1
1115	145.4	198.5	192.2		144.4	194.4	172.6		160.4	240.1	173.2		148.3	236.2	174.3
1116	146.8	205.9	193.2		146.1	197.4	179.5		163.5	240.8	172.1		150.5	229.2	171.7
1117	147.9	202.2	198.2		145.6	195.4	176.4		161.6	234.4	174.6		150.7	232.2	174.1
1118	146.3	200.4	191.5		147.3	184.1	170.8		165.8	241.6	174.9		149.6	233.9	173.2
1119	146.5	201.5	201.2		146.2	195.1	179.9		162.2	242.8	173.5		150	232.9	170.1
1120	146.1	201.1	201.8		146.9	196.5	178.3		162.7	241.1	175.8		151.3	235.4	169.8
1121	143.6	201.4	196.4		145	187.1	170.8		161.3	235.3	174.9		149.3	231.7	175.8
1122	146.8	212.4	197.1		147.9	190.6	173.6		161.4	236.6	173.7		149.7	226.3	169.6
1123	145.3	203.6	194.4		146.4	187.9	175.1		163.2	231.5	171.8		151.9	235.4	169.7
1124	146.9	204.9	209		145.2	193.4	177.3		165.3	235.6	169.9		151.8	233.2	171.6
1125	145.2	207.1	199.9		145.8	192.1	178.2		165.9	233.9	170		149.2	229.5	169.5
1126	146.2	200.6	201.5		144.5	196.4	170.8		165	240.3	169.6		152.5	234.6	175.1
1127	146.2	197.5	200.8		146.3	196.8	171.8		164.5	238.8	170.5		151.4	231.5	169.1
1128	147.5	203.2	198.8		144.7	185.6	177.4		162.2	236.9	171.7		151	239.8	168.2
1129	148.1	209.6	204.4		146.5	191.6	170.3		165.4	235.4	168.9		150.8	222.6	171.1
1130	147.1	203.9	211.1		145.3	188.8	173.5		161.6	233.1	164		152	230.9	167.6
1131	147.2	195.6	206.4		146.4	189.8	172.1		160.7	236.1	171.3		151.6	233.4	170.7
1132	145.1	210.9	202.5		146.7	196.1	173.6		164.9	233.4	165.6		148.9	231.9	169
1133	146.6	201	209.4		144.2	199.9	174		163.2	234.4	169.4		151.1	229.6	168.1
1134	146.8	204.6	206.2		146.5	192	170.1		164.2	239.7	164.6		149.3	230.7	171
1135	149.3	202.2	206.9		146.8	194.6	176.6		163.7	239.2	169.4		151.9	226.2	169.7
1136	146.5	203.2	211		144.4	186.8	175.7		165.2	240.2	170.1		150.8	235	171.9
1137	146.3	198.8	206		143.4	190.8	174.6		163.2	238.4	167.4		151.5	228.5	168.4
1138	146.6	204	210.8		147.2	192.4	173.1		165.8	239.6	164.6		149.9	229.8	168.8
1139	144.9	204.1	203.8		145.3	191.9	174		164.2	236.8	165.7		150.3	231.9	171.9
1140	146.6	197.1	209.8		145.7	186.2	176.2		163.8	235	166.8		151.2	227.6	170.2
1141	147.1	200.9	203.1		147.9	189.5	168.8		164.8	237.3	166.2		151	226.6	166.9
1142	147.3	207.1	211.8		144.6	195.1	175.6		165.5	237.4	167.7		149.1	226.9	171.4
1143	147.3	208.6	212.8		144.6	196.6	171.8		162.1	231.2	166.6		151.3	230.4	167.7
1144	147.8	194.8	210.1		148.1	187.6	171.4		163.4	236.4	163.4		150.4	225.6	172.2
1145	147.6	200.9	210.5		144.9	194.4	172.1		161.6	240.4	168.6		149.7	223.7	171.8
1146	145.3	199.6	202.8		147	192.5	170.2		163.7	241.3	170		150.8	229.3	170.9
1147	148	197.9	212.5		148.4	185.6	169.9		162.7	241.2	167.9		150	220.5	170.9
1148	148.1	196.2	207.2		146	200.5	172.8		165.2	241.9	166.4		148.5	228.5	175.5
1149	146.9	204.4	208.2		146	192.5	172.6		161.2	244.2	165.6		150.2	228.9	171.1
1150	148	200	210.6		147.3	191	171.1		163.4	236.1	174.1		149.5	226.1	168.9
1151	149.2	199.5	211.2		147	190.9	172.3		162.9	240.2	165.5		150.3	228.6	173.9
1152	146.7	202.1	212.8		143.7	188	169.1		162.2	240.5	166		148.5	229.7	171.8
1153	146.3	193.4	216.9		147.6	193.2	172.6		165.6	227	170.2		149.6	229.1	171.4
1154	147.7	201	215.8		146.2	197.5	160.3		162.2	235.1	166.3		150.3	233.1	173.4
1155	148.1	199.6	216.9		145.1	193.2	168.8		162.1	232.8	171.8		147.8	236.8	171.6
1156	146.9	198.6	211.6		144.2	191.8	161.9		161.3	235.8	168.1		149.6	229.1	175
1157	148.2	196.8	210.6		144.5	186.2	168.5		163	237.5	165.2		149.2	224.9	170.4
1158	145.2	197	217.9		145.2	185.6	165.1		163.3	232.5	171.4		149.7	226.2	171.7
1159	145.9	204.6	221.9		147	187.6	164.2		164.3	235.5	166.7		151	232.8	172.7
1160	146.3	204.2	215.5		144.1	189.6	165.4		165.3	237.4	168.2		149.9	231.5	175.5
1161	146.9	196.4	223.1		146.5	191.2	169.8		163	232.9	171.8		149.7	234.4	175.6
1162	148.7	211.5	217.8		144.9	190.2	168		165.2	237.5	166.8		150.5	227.4	175.3
1163	146.8	197.1	226.2		145	187.9	165		163.1	236	169.5		151.4	226.1	175.8
1164	148.5	201.5	217.4		147.3	190.5	163.6		161.1	237.4	170.1		150.2	224.6	173.8
1165	148.4	207.1	231.4		145.7	190.8	169.7		161.5	239.8	170.7		151	232.1	179.5
1166	148.9	207.6	229.1		143.7	187.1	168.4		162.3	233.3	171.6		150.7	232.4	173.9
1167	148.9	203.6	218.5		143.9	188.8	171.8		157.8	232.4	166.6		152.1	227.7	176.2
1168	148.4	196	226.6		143.1	196.6	167.6		161.7	237.5	171.5		152.7	225.9	175.6
1169	148.5	201.8	220.8		144.6	189.5	169.5		168.7	236.9	167.7		150.3	227.8	174.5
1170	148	206	230.8		145.8	194	165.6		163.2	237.3	167.3		149.8	227.9	175.6
1171	146.9	197.9	225.4		143.6	189.9	170.1		162.3	233.3	164.4		149.4	227.8	178.4
1172	146.7	198.5	224.4		145.4	193.2	170.7		160.7	235	166.2		147.8	227.8	174.5
1173	148.3	203.8	225.6		146.5	188.2	171.1		162.2	235	170.7		148.7	230	178.3
1174	147.6	202.9	218		144.7	192.5	170.8		161.5	236.8	169.2		148.5	232.6	179
1175	147	208.2	215.1		143.8	190.6	168.1		161.5	236.1	168.2		149.7	228.9	176.1
1176	146.2	200.4	220.6		146.9	190	169.9		162.9	232.5	167.7		151.3	234	179.7
1177	148.1	201.2	223.2		146	190	172.2		163.5	238.5	166.8		152.5	228.8	174.1
1178	147.7	202.9	218.5		144.8	188	168.4		161	233.4	168.4		148.4	228.7	174.8
1179	150	207	227.6		146.9	192	169.6		162.6	236.9	166.2		150.8	221.8	177.9
1180	148.5	210.4	227.1		146.2	191.9	168.1		162.6	237.1	169.8		149.6	225.2	175.2
1181	149	200.8	234.1		147.6	187.1	175.7		162	239.2	165		150.2	223.1	180.4
1182	147.7	195.1	225.8		144.6	180.8	173.5		161.8	236.3	167.2		148.6	227.6	178.1
1183	148.4	211.5	229.1		143.6	192.1	171.6		162.2	233.6	166.8		149.9	228.5	179.8
1184	147	200.8	222		145.4	188.9	171.4		157.2	240.3	168.3		148.7	222.2	178.2
1185	146.8	205.9	229.1		147.5	196.8	173.5		158.7	242	164		150.3	223.5	178.9
1186	147.8	194.9	223.1		143.2	189.2	176.3		162.6	238.8	163.2		151.9	225.4	175.9
1187	149.4	208.2	228.2		143.9	188.4	173		159.2	239.1	166.3		153.3	218	178.6
1188	147.1	200.6	227.2		147.4	190.4	174.6		159.8	242.3	169.5		151.9	224.4	179.1
1189	147.3	205.4	230.4		146.1	188.8	173.8		161.2	234.1	170.3		149.1	228.9	178
1190	147.1	217.5	218.8		143.3	195.6	170.8		163.8	238.3	165.8		150.1	224.4	176.3
1191	146	195.6	221.2		145.1	188.1	168.3		158.3	241.3	165.7		149	227.6	178.5
1192	146.9	210.5	224.9		145.4	193.9	174.9		160.8	238.4	165.2		147.9	223.9	181.1
1193	147.1	205.4	222.8		146.8	193.6	170.2		160.8	239.7	165.3		150	223.2	177.2
1194	148.4	196.5	221.6		146.1	187	172.2		162.6	241	166.1		150	218	178.9
1195	146.4	202.6	227		144.3	191.6	171.6		161.5	234.9	163.5		150.4	226.4	179.9
1196	148.3	203.8	223.8		148.1	191.5	175.7		162.7	240.7	165.5		148.8	221.1	174.6
1197	146.6	199.4	208.8		147.6	184.6	174.7		159.6	235.7	164.8		150.4	218.5	178.4
1198	145.4	199.5	220.5		147.5	194	173.2		158.1	240.7	164.9		150	220.3	174.4
1199	147	204.1	219.5		146.1	193.6	179.5		159.7	236.6	164.2		151.2	227.5	176.4
1200	146.4	197	214		147.6	189.1	175.1		160	240.5	166.9		149.7	222.8	176.1
1201	147.1	205.9	212.2		144.7	191.1	172.3		164.4	240.5	163.9		151.3	226.8	176.6
1202	147.7	202.5	214.9		145.8	190.2	168.4		160.5	235.5	164		149	222.2	176.4
1203	146.1	206	214.1		146.9	189.8	167.9		160.5	233.9	165.9		148.8	224.5	169.6
1204	147.1	208.6	220.6		147	196.6	169.8		163.1	237.8	165.3		150.1	223.2	174.7
1205	146.8	207.1	219.2		143.3	192	171.8		160.6	239	165.8		152.1	223.7	172.7
1206	145.8	205.6	218.1		148	187.4	166.9		160.4	233.6	166.3		150	218.9	172.4
1207	146.4	197.2	210.9		146.6	193.1	168.2		161.3	239.8	165.2		148.5	224.3	175.5
1208	147.4	200.1	220.2		145.7	195.4	171.2		164.3	241.1	169.8		149.5	224.9	173.9
1209	147	200.8	216.6		146.2	188.4	174.3		163	238.8	167.9		150.1	229.6	175.9
1210	144.4	202.8	219.8		145.4	189.9	172.6		160.5	240.2	167		149.9	225.8	174.7
1211	146.9	202.9	219.1		144.4	193.6	167.6		164.5	239.2	168.6		150.9	224.4	172
1212	145.8	194.1	214.6		146.7	188.6	167.9		160.3	240.7	168		150	221.2	175.4
1213	145.9	200.1	210.4		146.5	189.2	166		165.6	232.4	164.9		150.9	223.5	180.1
1214	146.9	208.1	212.1		146.7	197.8	170.5		164.5	236.6	169.9		149.8	217.3	175.7
1215	148	206.2	206.8		147.7	183.5	170.4		160.7	233.9	168.1		150.7	219.9	173.9
1216	147.6	198.5	211.5		150.2	197.4	174.5		162.1	230	168.4		148.5	224.5	174.8
1217	146.6	197.6	208.5		146.5	195.1	169.9		160.6	229.7	170.5		150.6	222.7	177
1218	147.4	202.8	217.2		146.6	193.9	169		157.6	233	173.3		149.4	222.5	174.4
1219	145.4	206.1	201.8		147	198.5	166.5		160.4	235.9	171.1		149.6	218.1	171.7
1220	146.9	196	207.6		147	195.2	168.1		156.7	231.4	173.6		151.8	225.5	173.6
1221	146.5	202.4	205.2		148.7	194.2	169.2		159.6	232.5	170		147.5	215.2	170.7
1222	144.7	204.9	201.2		149.7	192.2	167.2		162.7	235.8	176.2		152.2	229.1	174.8
1223	148.7	204.9	198.5		149	194.1	176		158.5	233	174.8		148.7	223.2	172.6
1224	146.4	198.2	195.8		147.4	194.9	170.7		160.5	235.8	176.3		150.2	218	171.8
1225	144.5	201.8	203.2		146.4	191.8	169.7		160	232.9	177.7		150.8	228.6	173.7
1226	145.7	201.8	205.6		149.6	194.8	173.3		158.9	235.2	179.2		151.1	223.9	171.8
1227	146.1	198.9	192.5		147.5	195.2	168.1		161.3	229.5	180.8		152	223	174.7
1228	147	204.1	200		148.1	193.1	173.5		159.5	236.1	177.4		150.2	228.1	170.8
1229	148.2	205	201.4		148.9	195.4	171.8		162.9	237.4	177.1		149.5	225.2	171.9
1230	145.6	205.4	190.2		148.9	188.9	173.9		162.2	231.5	178.3		149.9	222.9	172.5
1231	146.3	198.6	192.2		147.1	196.8	171.4		161.3	234.4	182.2		152.8	226.5	176.6
1232	146.1	199.1	190.9		147.5	196.9	170		157.9	230.5	179.6		152.7	223.2	172.2
1233	147.4	199.8	192.1		146.2	191.9	171.1		162.2	231.5	182.1		150.8	226.2	175.5
1234	145.8	205.1	199.8		148	191.4	173.6		158.7	237.5	182		149.6	219.1	173.4
1235	148.1	201.1	180.4		147.8	194.2	168.2		161.4	237.6	180.8		148.9	222.6	172.8
1236	144.7	198.6	188.2		148.7	192.6	169.6		160.2	239.3	181.1		152.1	221.4	175.4
1237	146.4	207.9	187.2		147.4	200	171		158.7	231.2	178.9		150.7	225.9	176.3
1238	145.3	206.4	191.9		148.9	189.1	174.4		157.8	228.2	182.1		151.2	222.8	177.1
1239	145.2	192.9	190		148.6	193.6	173.9		158.9	236.3	178.1		150.2	222.5	175.2
1240	146	201.8	192.4		147.7	201.6	169.8		160.4	236.2	181.3		149.4	223.8	177.2
1241	145.4	199.9	189.6		148.1	199.8	177.3		160.1	232.8	178.9		150.8	217.2	175.9
1242	144.5	196.9	184.9		147.1	202.1	171.9		162.3	238.6	181.5		149.6	221.1	177.4
1243	147.3	205.5	183.8		149.4	199	179.3		163.5	237.7	179		149.4	220	180.2
1244	147.9	201	182.8		147.4	188.9	172.4		160	241	180.7		148.7	227.4	173.9
1245	145.6	200.6	187		148.3	199.6	177.2		161.5	233.8	180.7		149.7	225.7	176.4
1246	145.9	208.2	180.9		150.8	192.1	179.6		161.2	237.9	182.4		149.1	223.7	178.4
1247	145	201.9	186.6		150	190.6	176.9		161.3	238.7	181.5		150.6	225.8	175.8
1248	146.8	194.1	181.6		146.5	200.6	176.2		160.8	237.8	183.7		149.9	230.1	179.1
1249	144.2	194.6	190		146.4	193	175.6		162.1	238.2	180.8		148.3	219.1	179
1250	146.5	199.8	186.5		146.5	187.2	182.2		158.6	234.4	181.2		149.4	221.2	176.9
1251	145.8	196.4	184.2		147.8	193.2	179.1		159	236.2	183.3		150.9	224.9	175.1
1252	147.3	199.9	185.6		148.2	191.1	180.2		157.7	237.3	181.4		148.7	218.6	174.8
1253	145.8	200.9	187.8		147.1	199.9	182.8		162.5	235.8	184		149.3	222.8	175.1
1254	146.9	202.6	178.8		148.5	192.6	180.3		163.8	237.1	182.9		148.6	218.9	172.2
1255	146.6	195.9	184.2		147.7	193.9	181.3		161.8	239.7	182.1		148.7	224.6	172.6
1256	146.7	195.4	181.1		147	188	179.6		158.7	238.5	179.2		149.1	226.3	174.6
1257	148.2	204.5	181.9		150.6	199.9	180.4		160	236.2	179.5		149.6	228.1	170.5
1258	147.8	200	180.4		149.3	191.2	181.4		160.4	237.3	177.6		149.9	221.3	171.6
1259	145	206.4	184.6		150.5	185.8	178.4		163.5	237.7	180.9		149.5	229.5	171.6
1260	147.8	206.4	181		149.1	193.2	183.8		158.3	233.6	182.8		149.9	218.8	170.6
1261	145.6	207.6	182.4		147.1	198.2	180.2		157.6	236.2	183.6		150.2	221.4	171.6
1262	145.5	204.1	190.5		149.9	190	186.9		160.6	237.5	176.5		150.3	220.7	169.9
1263	144.4	195.6	178.9		147.9	196.6	188		163.8	235.9	179.6		149.3	228.2	172.3
1264	146.9	194.2	176.6		147.9	191.8	183.1		159.2	237.2	179		149.6	220.7	169.5
1265	144.9	205.9	177.4		147.7	202.9	185.6		160.5	237.3	174.1		149.4	223.9	171.6
1266	146	199.4	181.9		145	190.1	194.2		161.9	236.4	177.3		150.5	224.5	170.8
1267	149.2	197.6	180.8		147.8	190.9	192.9		162.2	233.5	172.7		151	228.5	173.3
1268	146.4	197.9	184.1		146	194.6	193.4		163.9	234.9	175.1		150.1	226.8	168
1269	146	202.1	176.8		148.3	196.8	193.2		162.3	230.1	174.8		150	225.4	169.5
1270	145.4	205.1	176.9		147.8	189.6	195.9		162.1	233.8	174		151	228.1	170.7
1271	145.9	183	181.2		146.6	191.9	193.7		158.4	234.3	176.5		149	231.6	170.4
1272	146.4	199	183.5		147.9	197.1	199.1		162.7	234.3	175.3		150.9	224.7	169.1
1273	146.3	200.1	181		144	185.8	193.9		162.3	239.5	173.4		148.9	223.2	171.6
1274	146.6	203.5	176.6		147.3	190.9	190.9		160.3	232.8	174.7		150.8	229.1	168.6
1275	147	190.9	179.2		146.3	194.8	194.9		162.7	233.7	174.9		148.5	227.9	165.3
1276	145	201.6	185.6		146.8	187.9	196.1		161.2	235.4	170.5		150.5	225.6	168.3
1277	145.6	193.5	173.5		150	193.1	200.6		162.2	237.4	173.9		151.1	212.8	169.6
1278	147.8	203.6	182.6		144.8	192.1	195.1		158.7	239.3	172.5		149	223.2	166.9
1279	145.3	199	172.5		146.5	189.9	191.1		163.1	235.3	171.1		148.9	220.8	170.4
1280	147.7	200.9	175.9		146.5	188	198.6		162.6	237.4	167.8		151.4	223.7	171.8
1281	145.2	203.4	175.6		148.2	189.8	198.2		159.1	234.6	171.5		150.3	226.8	170.2
1282	146.2	197.1	180.6		147	184	194.9		157.1	238.9	172.5		149.1	222.4	166.6
1283	148.9	196.5	179.4		145.7	197.6	197.9		159.9	233.9	171.7		151.2	225.9	166.1
1284	146.8	208.4	178.6		148.1	194	194.6		159	240.2	170.3		150.7	223.5	164.9
1285	147.2	198.6	174.1		145.2	190.6	197.7		163.8	240.9	171.9		150.1	216.9	170.7
1286	147.1	197.1	166.5		148	199.5	198.5		161.4	240.4	173.6		150.8	222.4	164.9
1287	149.4	205.5	176.6		148.1	188	193.9		163.8	238.6	177.3		149.6	218	165.6
1288	146.1	206.9	169.9		148.6	194.2	198		163.4	238.7	176.4		149.2	214.8	165.1
1289	148	200.9	168.4		148	191.2	199.1		162.8	241.9	177.1		148.6	220.8	166.6
1290	148.7	198.9	171.4		147.1	188.8	196.9		162.7	237.5	175.5		151.4	224.9	160.8
1291	146.5	203.1	171.4		145.9	193.5	193.5		161.1	240.4	174.5		153.1	218.6	165.6
1292	146.6	202.6	173.6		147.2	190	188.6		161.4	241.6	174.5		149.5	217.8	167.7
1293	147.2	196.2	168.4		147.9	191.8	192.5		161	241.1	173.5		150.3	225.1	164.7
1294	148	198.9	170.8		146.2	191.2	185.2		159.7	237.4	180		148.2	220.8	162.7
1295	146.9	204.9	178.5		148.6	201.9	187.9		160.5	237.6	178.1		148.8	218.9	166.6
1296	147	203.6	165.5		146.3	198.8	186.1		160.4	237	177.6		151.3	222.7	164.1
1297	146.8	201.9	174.1		147.6	196.6	190.4		159.1	243.2	176		151	216.2	163.5
1298	148.5	205.2	174.6		146.1	193	185.4		159.2	237.4	178.2		149.5	226.2	163.4
1299	146.4	203.2	167.6		146.8	185.5	188.1		160.2	238.8	177.4		149.2	224.4	164
1300	147.2	199.4	168.2		148.8	187.4	182.9		162.1	238.2	177.8		150.6	223.8	166.7
1301	145.3	203.1	166.1		146.4	191.5	187.6		159	240.9	176.4		150.9	217.9	166.8
1302	144.9	202.4	172.9		148	193.6	183		161	240.5	174.9		149.1	218.5	162.9
1303	147.8	199.4	177.5		144.2	193.2	184		161.1	234.1	174.6		150.3	222.5	168.2
1304	147.7	202.9	172.6		148.5	185.2	178.2		157.5	240.7	177.1		149.6	219.1	163.7
1305	145.9	198.9	179.8		147.4	195.9	181.3		163.2	237.1	172.8		149.9	222.1	166.3
1306	148.2	202.4	173.2		149.1	196.4	185.2		158	237	178.9		150.5	222.2	165.3
1307	147.3	192.4	172.9		145.7	189.9	181.5		161.4	238.4	174.8		150.6	224.3	163.9
1308	146.2	208.4	170		148.4	193	179.3		157.9	236.1	173.4		149.5	218.6	163.5
1309	146.6	202.5	168		146.3	189.4	174.4		163.5	234.4	174.1		150.8	223.2	165.4
1310	146.9	196.1	173.1		146.5	191.1	180.8		161.3	238.7	174.6		150.8	225.8	166.4
1311	147.6	198.4	167.5		145.2	194.5	181		165.3	236.1	172.4		150.2	226.2	162.7
1312	149.1	203.6	175.1		144.9	197.1	178.4		160.1	233.6	173.8		149.4	218.7	165.9
1313	147.5	201	165.6		146.1	192.9	176.4		164.1	239.1	175.7		150.1	225.5	162.9
1314	145.5	200.6	173.4		145.7	195.6	176.9		161.7	235.3	172.9		150	221.8	165.4
1315	147.1	195.2	168.4		147.2	193.6	175.1		163.5	238.1	171.7		148.7	225.4	164.8
1316	145.8	199.5	174.6		145.1	195	179.8		162.5	235.8	172.9		151.3	227	168.9
1317	147.7	199.1	168.8		146.8	189.9	176.8		161.4	237.2	171.7		150.8	219.9	165.7
1318	148.9	198.9	175		144.1	189.8	169.5		162.6	239.7	170.4		150.1	218.3	167.6
1319	147	195.5	168.2		148.1	188.2	172.2		160.2	237.5	172.9		149.7	222.8	170.7
1320	147.8	202.5	169.9		146.9	188.6	171.9		162.8	238.1	175.3		149.6	226.3	165.7
1321	147.4	200.9	170.1		146.8	194.1	172.2		162.1	244.3	168.7		151	223.2	164.2
1322	147.4	211.5	170.9		147.2	189.5	178.8		160	235.1	175.4		148.6	221.6	166.5
1323	145.8	198.1	170.5		148.3	191.4	175.7		164.5	238.8	172.3		149.6	224.8	165.1
1324	146.8	203.8	174.2		146.9	192.8	173.3		161.7	243.7	170.8		150.4	217.6	165.7
1325	146.1	198	170.6		144.8	190.1	176.8		159.4	235	172.3		151.8	221.3	168.8
1326	146.2	202.1	167		147.1	187.8	178		161.5	237.9	169.9		152.4	221.5	167.4
1327	147.6	197.1	169.1		145.5	191.6	179.8		162.2	244.8	169		149.8	221.9	165.6
1328	148.6	205.6	171.9		145.1	196.9	178.3		161.7	245.2	171.2		148.8	230.5	168.9
1329	147	199.4	168.8		145.7	196.6	175		160.2	242.3	169.2		149.2	223.9	169.6
1330	148	204.5	172.1		146	191	174		162.8	237.8	170.9		149.6	222.6	168.8
1331	146.3	206.4	171.2		148.4	192.2	173.5		161.4	244.3	169.5		149.7	220.1	168.4
1332	148.2	196.5	164.1		147.2	188.9	178.1		158.7	244.7	170.2		152.5	221.9	166.3
1333	146.9	202.9	169.6		146.4	192.8	179.7		162.2	242.3	171.9		150.4	223.1	169.2
1334	146.8	210.6	172.2		148.6	191.8	178.7		161.8	243	171.1		152.4	225.9	165.2
1335	147.4	203	170.8		146.9	187.2	178.9		160.5	244.2	169.7		150	222.4	167.8
1336	146.5	205.8	167.9		147.9	187	178.7		160.8	241.8	169.6		150.2	222.8	168.3
1337	146.1	205.6	165.4		145.9	201.1	172.2		161.8	238.7	171.1		150.7	225.5	167.5
1338	146.9	212.4	170		146.8	190.2	174.2		160.1	242.2	168.3		150.4	221.4	169.6
1339	147.5	193.8	163.2		147.3	196.1	177.2		162.2	241.5	170.3		153	220.5	168.7
1340	148.7	202.6	173.5		146.3	195.4	175.9		160.9	237.9	172		150.1	217.9	166.1
1341	144.3	196.9	169.9		144.6	188.6	174		163.2	245.3	172		150.7	225.9	167.1
1342	146.5	217.1	178.1		146.1	191.8	170.9		160.9	239	168.6		150.3	223	167.8
1343	150.1	203.9	164.8		145.2	193.2	175.3		160.3	237.1	169.2		150.8	223.6	169.9
1344	144.2	200.1	166.8		143.4	191.1	175.8		161.8	239.6	173.7		150.7	226.8	168.9
1345	145.5	204.5	166.2		146.9	194.4	176.8		163.7	242.8	168		153.8	226.5	165.1
1346	146.1	199.8	172.1		147.3	191	174.6		164.4	241.7	166.3		149.7	221.1	166.4
1347	144.5	199.2	171.8		147.3	188.1	170.3		162.7	241	173.8		152.5	229.2	164.1
1348	147.1	200	164.6		145.2	192	172.3		162.7	239.7	174.2		150.6	222.1	165.1
1349	146.2	202.5	167.9		147	191.2	172.9		161.5	241.9	170.9		150.8	228.6	168.8
1350	147.3	203.9	170.1		145.6	200	174.8		162.6	235.4	169.8		152.1	225.3	168.5
1351	146.2	194.8	171.9		146.8	194.9	173.1		164	240.9	171.4		150.8	218.5	171.4
1352	147.5	209	161.6		148.6	193	170		163.4	233.4	171.3		152.1	224.5	168
1353	146.8	202.8	172		147.2	186.2	172.6		162.3	239.2	172.9		150.2	222.8	171.1
1354	147.8	206.1	175.8		145.5	187.9	169.9		158.8	240.4	169.6		147.9	219.7	169.1
1355	147.4	196.5	168.2		145.6	186.1	176.6		159.2	236.9	170.3		150.3	226.5	170.1
1356	147.8	200.1	173.1		145.8	201.1	175.7		159.7	238.3	173.2		151.3	227.7	170.6
1357	147	201.8	171.9		146.4	195.6	172.7		162.7	238.8	172.3		149.9	224.8	166.2
1358	146.9	195.4	173.2		144.9	198.6	171.7		159.5	239	173.8		151.2	218.9	170.1
1359	146.6	197.2	179.5		148.5	192.5	166.6		158.9	238.3	172.8		151.3	223.5	172.1
1360	147.2	195.4	169.5		147.5	192.9	170.7		159.9	235.1	173		152.8	221.3	167.1
1361	146.5	195.4	166.8		144.6	191.8	168.3		159.8	237.2	167.4		149.4	220.9	167.2
1362	145.4	204.6	170.8		145.7	193.2	169.9		160	234.6	171		152.8	225.8	168.1
1363	147.1	203	171.5		147.1	193.5	167.7		162.8	238.9	172.6		148.9	230.3	170.9
1364	146.1	200.6	172.2		145.2	187.8	173.7		160.8	232.4	174.8		149.6	219.5	169.2
1365	144.8	199.4	176.6		149.1	187.5	171.9		162.4	238.3	169.9		151.2	223.2	171.8
1366	147.4	212.1	179.6		147.3	189.2	172.5		159.2	235.9	174.6		150.3	223.5	168.7
1367	147.6	205.9	171.4		145.9	193.1	167.6		158.8	234.4	173.5		152.2	217.2	172
1368	146.2	206.8	176.8		145	195.4	170.8		161.4	234.8	172.6		151.2	221.9	169
1369	147.3	204.9	183.8		144.2	185.4	172		161.2	229.2	169.4		152.3	226	170.1
1370	147.1	195.4	175.8		146.8	197.9	170.3		162.8	237.4	172.1		150.1	218.4	173.3
1371	145.1	200.9	184.8		146.7	189.4	172.8		162	232.1	175.3		150.5	219.9	173.3
1372	148.5	191.4	183.6		145.9	192.8	166.2		159.2	234.9	171.7		151.8	229.2	172.2
1373	144.9	201.2	181		146.5	189.2	175.6		162	238.8	173.6		153	226.6	173.2
1374	146.9	204.2	191.1		145.8	187.8	171.3		158.1	232.3	175.6		150.8	219.4	171.9
1375	146.8	202.9	181.5		144	191.4	171.2		157.7	237.9	176.4		149.2	221.6	174.8
1376	147.1	197.8	177.8		144.2	190.9	171		161.6	234	175		152	226.5	176.9
1377	144.7	203.4	179.6		145.4	186.9	169.8		163	232.5	174.8		151.8	218.9	175.4
1378	146.3	200.5	193		146.2	186.4	165.8		161.9	233.4	176.4		150.9	221.1	174.1
1379	145.7	202.2	182		146.3	188.2	171.2		160.9	237.5	170.3		150.3	220.2	175.3
1380	147.6	195.1	188.6		145.4	189.5	166.8		159.9	238.4	176.6		150.9	220.2	174.7
1381	147.3	190.1	191.2		146.3	184.4	172.1		161.1	226.8	177.1		152.1	228.2	175.6
1382	147.3	196.9	182.4		144.8	188.2	172.6		157.8	230.2	175.8		150.7	220.2	175.8
1383	147.2	196	183.6		145.9	183.1	173.9		160.2	238.5	172.8		152.9	227.2	175.4
1384	149.1	199.9	178		143.3	190.1	173.7		156.9	238.7	177.8		151.1	219.4	171.1
1385	147.6	194.9	185		146.5	191.5	173.7		159.4	233	172.6		151.3	226.4	174.1
1386	148	201	187.1		146.9	184.8	179.6		157.8	236.9	175.2		151.6	223.1	172.7
1387	146.6	202.4	180.5		147.4	192.8	168.8		161.5	228.7	172.6		151	223.4	174.9
1388	147.6	200	191.8		147.4	203.6	167.9		159.1	232.1	172.2		150.6	222.6	171.7
1389	148.7	204	189.4		146.6	196.1	174.2		160.1	238.5	173.3		151	220.2	171.9
1390	146.8	198.1	184		145.2	186	175.6		160	234.8	171.8		150.5	226.6	173.4
1391	145.9	195.9	189.8		144.9	189.5	172.9		161.1	235.1	175.3		151.1	214.5	171.9
1392	147.1	197.6	187.6		146.4	192.4	171.8		158.6	231	176.5		149.7	223.3	171
1393	144.6	204.6	185.5		147.4	195.2	171.3		161.8	229.9	174.4		151.1	221.9	175.1
1394	147.6	203.5	193.2		147.6	192.6	177.6		161	234.6	175.7		151.2	220.1	171.7
1395	145.7	198.8	190.9		147.2	190.4	174.1		157.7	236	177.8		150.9	221.1	176.2
1396	146.6	199	193.1		150.6	191	185.2		161.6	233.3	175.2		150.6	225.8	172.9
1397	145.8	200.4	182		146.8	200.2	180.1		160.9	234.9	176.8		151.3	221.2	173.4
1398	147.9	211.9	193.6		148.2	191.8	177.9		157.7	230	178.2		151.6	227.8	172.3
1399	147.1	200.4	197.6		147.1	194.5	175.2		159	230.7	177.2		150.1	229.6	173.9
1400	148.4	199.6	197.8		147.6	192.5	179.6		162.1	229.8	177.2		150	220.7	174.4
1401	148.3	197.4	206.8		147.6	198.5	178.8		161.2	235.2	180.2		152	224.5	174.3
1402	145.3	199	197.4		145.7	188.5	175		161.8	226.6	178.7		150.2	218.8	177.4
1403	147.8	206.8	199.5		145.7	194.4	174.1		163.2	230.3	178.2		150.2	221.8	174.2
1404	146.6	205.6	206.9		148.3	197.8	177.4		162.7	229.4	182.8		150.6	227.5	171.8
1405	147.3	204.2	201.4		148.2	191	178.4		161.7	232.6	181.9		149.9	222.2	174.7
1406	149.5	199.9	196.5		149.1	191.2	178.8		162.6	234.9	179.2		152	223.6	177.2
1407	148	203.2	210.8		147.9	197.2	181.9		160	232.8	184.5		149.7	222.8	178.9
1408	146.9	197.8	206.6		146.1	196.5	180.1		163.3	233.2	181.1		149.3	221.2	173
1409	144.7	198.9	209.2		147.6	194.6	171.8		160.5	229	182.6		151.8	227.5	177.4
1410	145.7	201.6	206.4		147.8	188.9	183.3		159.6	233.1	181.6		151	220.5	174.8
1411	145.6	208.4	207		145.3	196.9	173.8		161.3	228.2	183.9		151.6	224.9	174.2
1412	145.3	204.6	214.6		149.8	197.8	179.7		164.1	233.4	185.6		150	230.2	172.7
1413	146.6	199.2	203.9		146	189.1	179.6		161.2	241.9	188.5		150.7	225.9	175
1414	147.9	196.4	209.1		146.5	189.2	180		165.4	232.1	190.7		150.4	223.1	175.3
1415	145.8	211	211.2		146.6	193.4	176.8		165	237.2	185.2		149.5	223.2	174.8
1416	147.2	204.6	210.6		145.7	193.2	177.7		161	234.8	190.2		149	222.7	173.9
1417	146.7	206.2	206.5		147.1	192.1	180.8		163.6	232.2	185.3		152.9	220.6	173.9
1418	146.3	203	210		147.7	195.6	180.9		161.4	236	190		150	222.8	171.9
1419	146.6	202.9	201.4		145.1	197.2	177.5		168.2	236.1	188.3		150.1	225.5	174.4
1420	148.8	207	204.1		146.1	191.2	178		161.6	232.8	186.2		150.8	222.5	171.8
1421	145.9	209.5	199.9		147.8	192.1	183.3		163	233.4	189.7		149.3	221.6	175
1422	146.9	199	201.2		143.7	194	179		160.9	237.8	189.8		150.5	216.5	173.4
1423	148	198.2	209.9		146.2	193	175.6		158.6	230.3	190.8		151.5	222.9	175.5
1424	147.4	206.5	205.6		145.5	190.4	177.6		159.4	236.5	184.3		151.7	228.4	173.4
1425	145.4	209.4	200.9		149.1	192.6	180.8		162.2	239.1	186.5		152.2	226.6	170.2
1426	147.2	200.8	199.5		147.1	191.8	182.6		161.9	236.5	184.9		150.8	223.2	173.4
1427	148.3	199.8	203.1		146.2	196.8	176.3		162.8	235.3	188.5		152.6	216.1	172.3
1428	146.6	195.8	203.6		146.3	196.8	185.8		162	239.3	186.5		152.7	223.5	176.1
1429	147.5	199.1	190.8		147.2	193.6	187.2		163.8	233.9	184.8		153.1	232.4	176.2
1430	145	194	203.5		147.2	198.9	183.9		162.6	238.6	187.1		151.5	219.4	177.1
1431	148.6	199.5	204.6		148.7	192.5	181.8		162.8	238.9	185.6		151.9	221.2	174.6
1432	147.8	203.2	195.1		145.8	202.2	184.1		160.6	235.8	186.4		151.1	227.1	173.8
1433	147	206	196.2		145.1	186.2	180.2		162.9	233.4	189.8		152.4	222.5	173.3
1434	146.1	209.2	196.9		146.6	191.1	184.4		158.4	245	184.9		150.9	225.8	169.9
1435	148.7	205.2	197.6		145.9	188.1	177.2		164.2	231.5	187.5		151	226.8	173.4
1436	146.5	201.1	194.2		143.4	184	180.4		159.4	242.3	185.7		151.8	224.2	173
1437	145.2	201.1	194.1		143.8	190.5	180.8		163.2	230.2	187.1		152.6	220.2	172.3
1438	147.1	200.6	193.6		146.7	184.9	181.4		162.2	233.9	185		152.8	220.5	169.7
1439	146.9	203.1	202.9		144.3	190.8	175.6		161.6	242.6	184.8		150.2	228	171
1440	147.4	210.4	191.8		147.7	185.9	174.2		157.7	233.7	181.8		150.5	224.4	174.2
1441	148.3	205.6	196.1		145.2	188.1	178.2		161.7	235.7	187.9		148.2	224.9	174.9
1442	145.5	203.1	196.4		144.3	189.8	178.1		163.6	232	181.3		150.9	223.2	172.3
1443	146.3	208.5	203.8		147.8	188	181.7		159.6	235.2	186.2		151.7	223.5	174
1444	147.1	204.6	195.4		145.2	187.5	175.6		159.6	236.2	184.1		150.4	220.1	174.1
1445	147.4	197.9	197.5		144.6	195.8	183.8		162.3	233.6	186.6		152.8	223.8	173.7
1446	145.2	201.8	199.8		145.4	194.8	183.9		158.9	235.6	186.1		151.7	222.9	175.3
1447	147.8	200.5	195.6		148.7	192.4	178.6		164	239.2	184.5		151.8	223.3	176
1448	147.1	211.1	193.6		144.3	190	179.5		162.1	233.8	185.5		152.1	218.8	176.7
1449	148	205.8	196.1		144.6	189.8	177.4		160.8	237.7	185.2		151	232.5	173.5
1450	147.9	201.6	198.2		148	189.9	175.9		158.8	238.5	182.2		152.2	223.8	176.3
1451	147.8	188.9	194.5		146.6	188.9	179.5		160.2	237.9	184.7		152.3	222.6	173.8
1452	145	205.9	200.6		146.4	188.4	179.5		159.2	242.6	184.6		150.4	226.3	174.1
1453	148.4	197.8	197		147.4	191.5	184.2		161.6	247.3	180.1		153.1	225.8	177.2
1454	147.6	200.1	191.8		146	191.9	183.5		158	243.2	184.8		152	222.6	174.2
1455	146.6	198	201		147.4	192.1	184		162.2	242.3	181.4		150	221.6	174.6
1456	147.4	200.2	196.9		148.1	196.9	180.8		161.1	238.4	178.7		151.1	221.6	178.3
1457	147.4	200	197.4		146.4	196.4	186.4		163.3	236.6	176.5		150.7	223.1	173.9
1458	147.4	198.5	198.5		147.6	195.2	177.8		161.8	239.2	181		151.9	218.9	174.9
1459	146.9	205.5	196.9		146.8	192	184.7		164.1	241.8	178.2		152.7	222.4	172.7
1460	148.6	200	199		147.5	190.2	185.1		163.3	242.4	180		150.6	220.1	176.7
1461	149.2	205.4	195.2		147.5	191.8	181.8		165	240.7	181.4		152.6	222.9	176.4
1462	148.1	210.9	195.9		147.1	189.5	178.8		164.8	240.9	177.4		150.2	221.9	172.6
1463	148.3	202.5	197.4		147.2	193.4	190.3		163.9	240.4	177		151.3	221.1	172.6
1464	146.6	197	203		148	193.8	183.3		159.1	251	175.9		152.6	227.1	173.3
1465	148.6	205.8	208.1		145.6	205.4	185.8		166.1	249.7	182		150.9	220.2	172.2
1466	145.8	198.5	211.4		147.2	190.4	185.8		159.1	250	176.7		151.1	224.7	173.3
1467	144.7	202.6	208.5		144	191.6	181.2		163.1	246.6	179.8		151.6	226.5	172.4
1468	146.8	201	209.4		143.6	186.9	182.2		164.3	244.8	177		152.3	231.6	171.7
1469	145.7	207.4	207.4		145.1	193.6	183.2		162.2	252.6	177.6		152.4	225.9	171
1470	148.1	205	205.5		146.9	190.5	190.8		159	248.4	181.2		152.5	220.6	172.4
1471	148.2	195.5	205.4		144.6	192.5	183		163.2	240.7	177		151.4	224.8	172.3
1472	147	192.4	199.6		147.1	195.1	183		167.1	239.2	173.5		152.3	227.8	172.7
1473	148.2	206.2	199.1		146.1	203.2	186.1		162.2	240	176.5		151.7	218.9	169.9
1474	145.6	192.9	195.1		147.9	187.6	186.8		163.7	251.6	177.1		150.7	222.1	173.5
1475	145.4	203.8	197.5		147.5	186	191.2		163	250.6	178.5		151.3	225.2	171
1476	144.7	196	199.8		146.7	186.2	187.6		164.3	242.3	176.7		153	229.4	169.6
1477	145.4	199.9	196.8		149.2	193.2	185.7		163.6	243.5	176.4		151.6	229.7	174.8
1478	145.9	199.9	193.2		148.8	193.2	188.3		157.8	238.2	179.9		153.6	221.8	173.3
1479	146.8	199.5	197.1		146.8	191.2	183.4		161.5	242.7	179		152.4	228.4	171
1480	145.6	198.6	200.4		144.3	196.2	185.6		160.5	249.3	181.2		153.7	223.1	171.7
1481	145.5	202.1	199		145.1	192	184.4		164.5	238.7	179		151.7	234	171.1
1482	147.4	202.5	200		148.4	188.9	184.1		161.7	242.9	180.2		149.6	227.9	172.1
1483	145.5	202.4	189.9		145.6	192.1	191.4		163.7	238	177.3		153.3	228.6	169.5
1484	146.2	198	189.1		146.1	189.8	187		158.4	240.4	183.3		150.9	231.5	170.7
1485	146.6	210.6	189.4		148.1	190.1	187.6		161.9	238.6	181.9		152.4	226.1	174.5
1486	146.2	200	191		145.6	192.4	190.6		161.1	237.5	181.5		153.3	225.2	176.1
1487	149	199.5	191.6		147.6	195.2	189.2		163.2	238.3	183.2		153.6	230.1	176.1
1488	148	207.2	191.1		145.2	190.1	190.8		163.4	238.6	182.6		154.5	232.7	177.2
1489	147.9	202.5	190.2		144.5	191.8	192.9		165.2	235.7	184.3		152.5	230.5	172.6
1490	147.3	199.9	186.4		148.7	191.1	184.4		163.4	238.4	182.8		153.8	233.4	175.4
1491	145.6	197.2	184.4		146.2	191	187.4		162	239	184.8		154.3	234.2	176.4
1492	146.6	202.2	195.8		148.2	198.2	191.2		164.3	241.2	184		151	229.5	173.5
1493	145.5	203.8	183.6		145.5	191.6	191		158.4	240.7	186.2		152.3	228.4	175.4
1494	148.6	200.5	192.8		148.2	183.5	190.6		162.1	245.8	189.8		151.9	224.8	177.1
1495	146.4	205.9	186.1		146.4	192.1	188.2		162.2	237.1	188.8		151.8	234.9	177.4
1496	144.7	199.4	185		145.9	191.8	186.8		165.5	238.9	189.9		151.3	228.9	177
1497	146	205.5	183.1		145.1	191.9	191.4		163.3	243	192.5		151.9	226.9	176.5
1498	147.4	199.8	189.6		145.7	194.8	185.8		163.2	240.7	193.1		154	231.5	176.1
1499	145	205.8	186.1		144.6	190	186.6		165.6	242.6	190.2		151.3	229.1	175.6
1500	149.3	212.1	192.5		148.7	188.6	182.2		162.5	242.8	193.6		151.9	228.8	173.5
1501	145.6	201.2	178.2		146.4	187.6	185.2		164.4	243.3	191.1		153.1	229.5	175.2
1502	148.3	201.6	182.8		144	197.8	185.2		162.8	238.9	189.8		153	228	178.3
1503	147	201.6	185.9		146	191.6	183.3		161.3	240.9	196.3		151.7	224.6	176.2
1504	147.5	198.5	178.6		147.9	186.2	183.9		164.5	237.1	194		155.9	227.4	177.8
1505	148.4	206	178.9		145.4	193.4	191.4		165.2	239.7	197.8		152.2	226.4	178.4
1506	146.9	194.4	175.4		145.1	194.1	185.4		162.5	237.6	198.2		154.4	226.1	179
1507	148.3	201.5	175		147.2	193.8	190.2		160.7	247.9	194.2		154.1	230.5	175.9
1508	148	201	179		143.4	191.8	190.2		160.9	238.1	194.2		153.2	230.5	178.6
1509	146	202	180.1		146.6	193.2	180.4		160	237.4	195.4		151.2	228.5	177.5
1510	145.9	196.1	178.5		144	189.4	186.2		162	236.9	192.3		151.3	224.9	180.3
1511	146.8	196.6	181.8		146.9	190.6	183.8		162	248.4	195.4		151.9	229.4	181.1
1512	147.3	194.6	172.9		146.3	188.4	185.5		161	239.9	195.2		152.4	231.9	180.9
1513	145.9	198.6	173.2		145.1	192.1	185.2		166.1	239.7	190.9		151.9	228.8	178.1
1514	145.9	200.1	185.9		146.2	192.4	180.7		162.8	248.1	198.6		150.1	220.1	182.1
1515	146.5	201.4	178.2		147.5	190.8	179.2		166.2	238.2	194.2		152.1	223.2	181.7
1516	146.5	197	175.8		144.8	192.8	186.4		164.3	235.9	196		150.3	223.1	177.8
1517	145.5	201.4	175.4		145.1	183.9	184.3		162.1	238	199		150.9	226.4	180.4
1518	147.6	199.8	183.8		145.6	192.5	186.2		163.7	239.6	192.6		152.1	228.2	178.6
1519	147.4	193.2	176.5		146.2	195.2	183.9		162.7	237.3	195		152.8	225	177.2
1520	145	198.4	176.1		145.4	198.4	188.3		162.6	239	197.2		150.1	219.1	180.3
1521	146.2	202.9	174.4		142.8	193.5	183.3		162	244.3	192.1		152.7	219.8	178.8
1522	146.9	193.4	177		146.5	188.6	186.2		164.9	237.3	195.2		150.9	222.4	177.3
1523	148.4	197.5	173.5		146.3	192.2	184.2		161.6	245.7	191.5		152.4	228.7	176.6
1524	147.4	200.5	179.6		144.9	195	186.9		164.1	234.3	188.1		151.4	230	178.8
1525	144.2	194.1	175.1		144.1	189.4	190.8		162.3	233.3	190		151.9	230.6	177.4
1526	145.6	200.9	176.5		145.3	191.2	192.1		161.7	244.6	188.2		150.9	227	175.1
1527	145.3	195.6	181.5		147.8	192.9	185.5		159.2	235.8	186		152.5	230.5	175.5
1528	148.4	199.1	175.5		144.8	190	190.1		160.2	236.6	183.1		152.3	226.7	172.1
1529	146.4	201.8	175.8		145.3	193.9	189.6		159.6	239.2	185.1		151.8	228.9	178.5
1530	147.8	197.8	180.5		145.9	198	192.8		163.8	235.8	187.2		150.8	228.6	179.4
1531	147.5	193	175.4		146.8	195.9	191.5		164	232.4	185.3		150.8	232.7	183.1
1532	148.1	189	168.5		147	192	190.6		163.8	241.8	188.5		153	229.3	175.6
1533	146.3	202.9	172.8		146.9	196.1	195.5		162.2	233.9	186		153.2	233.2	174.3
1534	147.9	199.9	177.5		147.2	193.9	191.2		163.4	233.7	187.7		152.7	222.2	175.6
1535	147	198.8	179.2		145.8	192.1	191		161.1	242.5	182.5		155	226.9	173.7
1536	146.3	194	182.9		146.3	197.9	184.9		160.4	233.6	180.6		153.7	232.9	172.4
1537	147.8	205.8	178.6		147.6	189.8	188.9		160.5	238.1	181.6		153.5	230.1	171.1
1538	147	202.4	173.5		146	194.2	190.8		163.6	234.6	180		152.6	225.2	173.1
1539	148.7	198.9	178.6		146	195	186.5		162.3	240.8	182.6		153.7	222.9	172.9
1540	147.1	203	172.9		148.5	189.9	185.5		160.3	247.6	179.5		152.8	228.1	173.2
1541	147.4	202.4	178		143.6	195	189.8		161.2	234	179.8		153.2	230.8	171.3
1542	147.3	203.9	186		145.1	194.4	186.2		162.8	240	177.6		153.3	229.4	173.1
1543	146.8	205.6	181.9		144.4	188.5	186.5		159.8	239.5	179.9		153.8	226.6	173.1
1544	148.4	202.4	177.8		145.6	194.1	185.5		158.4	237.5	178.2		152.9	223.6	171.9
1545	147.1	201.1	181.4		144.8	188.8	186.6		161.6	234.1	179.3		152.8	230.9	171.9
1546	149.8	205.4	181		147	190.6	179.9		161.4	232.2	176.5		153.2	230.4	171.6
1547	146.7	191.4	181.4		146.9	187.6	188.5		161.2	235.6	177.3		153.7	231.8	172.8
1548	147.4	196.1	176.9		146.9	194.4	182.4		161.2	242.8	177.4		154.6	227.9	172.2
1549	148	190.1	174.4		143.8	188.1	177.9		158.2	242.7	174.5		152.7	229.9	174
1550	148.3	191.2	180.5		142.9	192.1	182.9		158.5	236.7	176.7		151.2	221.4	171.9
1551	149	197.5	176.2		144.5	194.2	179		159.7	239.4	177.2		152.5	230.1	170.8
1552	147.8	202.4	188.4		146.1	194	180.2		159.8	237.3	176.3		153.4	229.8	171.5
1553	148.3	207	188.2		145.2	189.6	178.1		163.2	240.3	176		153.1	227.5	169.3
1554	147.9	202.5	183.4		146.6	193	181.5		163.9	247.5	178.5		151.4	231.3	172.2
1555	147.1	203.5	184.8		146.4	184.6	179.8		161.8	241.9	176.3		153.7	232.7	172.6
1556	147.4	199.6	184.4		147.7	194.9	177.1		160.7	237.2	176		152.7	227.9	171.1
1557	148.4	192.8	187		146.6	189.8	177.6		161.8	240.4	173.5		151.2	227.1	169.5
1558	147.4	203.2	189		146.6	185.4	177.4		162.1	244.3	175.7		153.7	224.2	170.6
1559	145.4	195.2	182		145.3	200.4	180.8		162.8	245.2	173.9		154.7	228.4	172.9
1560	147.7	202	184.9		145.3	194.1	173.8		161.6	242.6	174.8		153.3	221.9	173.8
1561	147.2	198.2	189.1		144.6	195	175.8		162.2	241.7	174.1		151.5	227.5	175
1562	149	192.1	196.2		145.6	184.1	179.2		161.1	244.1	176.2		149.8	222.6	171.8
1563	148	201.9	188		145.8	191	173.3		162.8	240.6	175.5		152.1	223.4	175.1
1564	147.9	197.6	189		147.1	187.5	174.6		158.7	245.3	173.9		151.6	225.4	171.6
1565	145.7	202.9	187.4		146.4	186.5	171.1		163.5	247.4	174.8		152.2	220.5	174
1566	145.8	194.6	193		147.5	190.8	177.2		162	242.9	174.9		151.1	227.6	175.6
1567	147.7	199.6	185.8		146.1	197.5	172.6		162	243.1	172.4		153.5	228.3	172.1
1568	146.2	189.5	180.2		142.6	189.4	173.7		162.5	236.1	172.8		152.3	223.8	176.1
1569	146.3	206.9	196.4		142.9	182.8	172.3		159.7	241.4	175.6		153.4	232.2	176.4
1570	148.7	204.6	192.4		145.1	188.9	169.8		165.9	242.4	174.1		151	229.1	176.4
1571	147.2	192.2	188.6		144.7	179.8	170.1		162.4	242.7	175.2		152.2	224.1	177.7
1572	145.3	205.9	193.9		145.5	181.4	169.4		163.3	245.7	173.8		153	226.9	176.7
1573	146.3	196.5	192		145.4	193	172.4		161.1	238.3	172.4		153.7	225.5	177.9
1574	147	189	192.6		146.9	185	171.2		163.8	240.4	172.5		152.9	221.4	177.8
1575	148.4	199.6	194.8		143	191.8	169.8		162.9	241.5	172.5		151.1	223.1	180
1576	147.2	201.4	193		144.5	190.2	168.7		164.7	237.6	176.6		152.9	228.5	181.6
1577	146	206.8	190.6		143.2	190.6	172.4		161.3	243.1	171.2		152.4	223.9	179.2
1578	145.8	199.1	195.6		144.6	183.2	171.1		159.4	241.5	172		150.8	222	180.4
1579	147.7	198.5	196.4		143.7	191.4	167.7		163.9	235.4	172.4		152.4	225.5	180.6
1580	146.4	197	195.6		144.8	193.8	167.8		159.4	243.3	173.7		149.4	225.6	182.6
1581	146.5	193.2	199.2		145	185.6	167.9		161.7	235.4	173.8		151.5	228.9	179.2
1582	145.5	200.8	192.2		146.9	188.2	170.4		162.7	241.4	170.4		150.1	223.6	182.9
1583	145.1	196.1	202.6		142.8	184.9	165.1		158.2	239.2	175		151	224.2	184.4
1584	148.6	194.5	196.2		144.1	183	168.8		161	232.7	172.1		152.5	225.8	183.9
1585	146.3	197.5	194.9		148	182.6	166.6		159.5	237	171.5		153.2	220.4	184.1
1586	147	199.9	190.6		142	190.6	172.2		162.1	238	173		151.1	222.5	184.4
1587	147.9	200.9	195.9		142.9	191.9	170.4		158.4	237.2	172.8		151.9	227.4	180.2
1588	146.5	192.9	193.4		142.3	189.6	166.3		159.7	236.7	172.7		153.3	222.2	181.5
1589	145.5	201	192.5		146.7	189.5	169.8		163.2	238.1	172.4		153.1	225.1	182.9
1590	146.2	206.5	203		143	183.5	167.2		162.6	236.7	171.4		152.5	224.8	183.7
1591	146.4	195.2	207.2		144.4	187.6	166.1		162.7	241	176.2		153.9	228.4	181.9
1592	145.9	195	194.6		145.2	189.9	172.9		155.9	243.8	173.4		152.5	221.5	183.9
1593	146.8	200	191.6		141.4	182.8	170.5		158	237.2	174.2		153.9	222.5	181.8
1594	147.4	193	197.1		144.7	197.2	170.6		160.9	237	173.3		151.2	218.3	181.3
1595	145.9	204.4	190.9		143.8	192.4	166.9		159.5	233.6	175.4		153	224.9	184.3
1596	146.3	201	193.5		145.1	188.2	165.7		161.6	230.5	174.1		151.4	222.8	181.6
1597	144	194.9	193.5		143.5	192.8	165.7		160.3	244.1	181		153.3	220.5	182
1598	146.9	209.5	198.2		143.7	192.9	170.6		159.5	238.1	176.9		152.4	223.3	181.6
1599	144.9	203.4	191.4		147.6	193	167.6		158	237.8	174.6		152.8	225.6	178.7
1600	145.2	202.8	194.9		142.9	198.4	171.3		158.8	236	176.5		154.5	229.9	176.2
1601	146.9	202.4	200		144.4	188.2	167		161.9	246	180.3		151.8	223.2	180.7
1602	146.6	196.8	190.1		145.2	197.1	164.8		160	235.5	185.9		152.1	220.7	177.9
1603	146.2	195.5	190		145.1	192.2	168.2		160.8	236.8	182.7		151.8	215.8	180
1604	147	198.5	191.5		147.3	185.2	167.6		159.6	231.3	179.3		151.8	229.4	178.9
1605	145.3	196.9	200.8		145.6	191.4	170.4		163.8	237.6	182.2		153.2	225.1	177.7
1606	145.2	195.4	187.2		147	186.2	169.2		159.2	234.2	183.5		151.6	225.1	179.6
1607	147.4	200.6	188.8		144.1	197.8	169.6		162	236.1	181.2		154	222.4	177.4
1608	146.7	197.4	186.4		142.4	187.1	168.9		164.4	235.8	179.5		152	224.4	175.1
1609	146.4	199.6	187.2		146.3	189.2	165.8		160.4	240.6	181.7		152.3	222.5	177.4
1610	143.9	196.2	183.6		144.4	188.2	168.8		159.3	240.6	185.6		152.5	227.1	177.7
1611	148.2	202.6	180.9		145.2	192.6	167.8		160.8	235.7	184.8		152.4	222.1	176.1
1612	145.8	196.5	188		145	190	168.3		160.8	236.1	185.9		152.7	224.8	175.4
1613	145.1	199.2	175.1		144.4	189.2	170.9		161.8	241.8	185.4		149.6	222.8	178.7
1614	145.4	199.5	187.8		146.1	189.2	167.1		164.2	240.2	189.7		151	227.4	176.8
1615	145.2	208.4	184.9		141.9	193.5	166.8		164.9	238.8	189.1		152.9	221.3	175.4
1616	143.6	197	184.9		144.9	194.8	170.2		162.7	242.3	191.9		150.8	225.3	176
1617	142.9	193.9	181.1		144.2	191.6	165.4		162.4	249.8	191.7		154	225.1	175.3
1618	148.2	192.5	183.9		144.9	187	172.9		163.2	240.2	192.7		150.3	220.8	178.8
1619	145.8	201.9	181.1		146.4	188.5	172.6		161.2	239.9	193.1		151.2	228.1	178.6
1620	144.1	199.4	183.1		144.4	186.8	170.7		163.3	237.1	192.5		150.7	224	176.6
1621	146.9	208.2	181.9		145.4	189.5	172.2		163.3	242.8	191.3		153.9	221.5	174.9
1622	146.2	199.4	183.6		144.1	193.9	171.9		166.2	239.9	193.5		150.6	219.1	182
1623	143.6	196.1	176.2		146.2	192.1	174		165.2	241.3	198.2		151.5	216.4	178.1
1624	145.4	195.4	181.4		144.4	191.8	171.8		162.9	236.4	200		150.8	220.1	177.1
1625	146.3	200.4	175.9		145.6	192.2	178.2		164.4	241.1	198		151.3	223.3	179.7
1626	145.7	193.6	180.8		145	189.9	174.8		159.4	242.8	204.4		151.6	221.8	184.6
1627	145.5	197.5	185.5		144.9	193.8	181.4		161.7	234.7	198		150.6	220.9	176.3
1628	144.9	197.8	172		144.6	193	173.8		162	239.8	198.4		150.5	224.4	177.3
1629	146.6	200.2	182.8		144.9	187.9	176.6		162.6	236	195.8		150.4	229.5	176.4
1630	144.3	200.8	177.5		145.9	187	180.4		159.7	240	201.9		151.2	232.5	178.1
1631	145.4	184	182.5		145.3	193	177.9		159.9	245.1	201.4		152.7	222.5	176.1
1632	146.9	198.9	183.6		142.1	196.4	178.2		161.9	245.2	200.2		151.7	222.2	181.6
1633	145.3	191.1	183.2		145.8	191.9	181.9		165.3	240	199.9		151.2	227.4	174.6
1634	145	196.5	178.8		148.9	189.1	178.4		163.6	240.8	199.9		153.4	221.9	173.3
1635	145.9	193.4	178		145.5	192.9	180.8		163.4	238.3	196.5		151.7	220.1	177
1636	147.1	197	179.4		146.3	186.5	178.4		162.5	236.8	199.1		154.4	225.2	176.5
1637	145.6	198.1	182.4		145.2	181.9	183.9		162.9	240.7	194.1		153.1	224.5	173.7
1638	145.6	198.1	176.2		142.9	195	176.4		163.7	246.3	195.5		152.2	222.4	175.3
1639	144.7	196.5	183.1		147.6	193.9	182.6		159.8	238.1	194.5		152.5	226.5	176.7
1640	145.7	196.5	182.6		148	186	180.9		161.9	242	197.7		151.3	225.5	175.4
1641	146.1	200	183.9		145.4	190.4	178.2		162.6	238.9	195		151.5	222.6	177.3
1642	145.3	195.4	189		145.1	194	178.9		160.7	238.9	197.6		152.3	226.7	176.7
1643	144.4	200	190.5		145.9	196.9	179.2		158.7	249.9	190.3		151.5	217.4	173
1644	147.6	194.1	191		144.7	184.9	174.8		157.8	247.8	198.3		152.6	231.8	173.8
1645	145.3	190.5	191		144.5	191.9	179.9		161	239.7	193.3		151.6	221.8	174.8
1646	143.9	198.2	190.9		147.2	195	178.2		163.9	238.9	190.2		154	229.2	172.2
1647	144.5	198.8	194		144	186.1	177.3		161.3	233	193.2		152.8	223.4	175
1648	144.8	191.9	195.5		146.5	187.2	180.4		160	235.3	191.2		151.3	217.2	175.5
1649	144.9	207.2	195.8		146.7	194.5	177.6		161.9	244.7	189.4		152.4	221.2	175.4
1650	146.3	197.6	196.1		145.9	189.4	182		161.7	239.8	190.6		152.3	230.9	171.6
1651	145.8	202.5	198.4		145.4	194.9	181.9		161.5	236.4	190.8		154	227.5	173
1652	145	193.6	196.8		146.1	191.1	181.3		159.8	241.8	191.8		150.9	224.7	171.3
1653	144.9	196.1	193.4		143.8	192	180.2		161.3	237.8	191.2		153.6	222.6	172.6
1654	147.3	198.5	201.5		147.6	189.6	178.3		161.1	248.1	193.7		152.9	226.6	174.8
1655	145.4	198.1	197.5		145.5	201.2	181.5		161.5	235.4	192.9		153.2	227.9	168.2
1656	145.4	196.5	194.6		145.5	195	177.3		162.6	243.6	192.6		152.3	228	167.9
1657	146	203	193.9		144.7	194.1	183.2		161.9	245	186.7		151.3	228.7	170.2
1658	145.9	193.2	197.1		146.2	187.5	178.6		162	243.6	194		152.3	221.8	169.2
1659	146	205.2	207.9		147.4	198.8	184		165.7	239.4	191.7		152.4	225.1	167.9
1660	143.3	200.6	201.2		144.6	198.6	177.2		166.2	236.9	196.3		151.8	232.1	166.3
1661	146.5	197.9	185		145.9	193.1	183.2		162.5	248.4	190.1		151.3	227.2	167.6
1662	144.6	185.8	202		142.9	188.5	182.3		164.4	237.5	189.4		152.7	229.7	169.7
1663	144.8	206.8	193.2		144.8	185.5	182.4		164.5	239.2	191.3		151.2	231.4	173.9
1664	146.9	204.5	195.1		145.2	199.8	182.2		161.6	245.5	191.5		149.6	223.2	170.3
1665	146.9	200.5	190.8		146.8	191.6	184.8		160	244.6	194		150.9	224.9	171
1666	144.9	194.6	194.6		145.9	189.4	181.9		161.2	245.2	191.4		152.4	227	171.9
1667	144.1	196.5	193.5		147.9	189.5	184.6		163.1	238.3	189.8		151.1	225.1	169.9
1668	145.1	204.5	196.6		148.5	192.9	180.7		160	249.2	191.3		154.6	225.2	175.3
1669	145.2	194.1	191.9		144.1	192.6	178.1		160.4	248.6	195.2		152.5	227.4	172.3
1670	146.8	198.8	198		147.2	187.2	181.8		159.2	241.3	194		153.5	226.1	170.5
1671	145.5	197.8	194		144.6	186.1	183		164	241.1	197		151.4	232.5	172.4
1672	145.3	200	190.9		145.3	192.6	180.9		163	239.8	193.4		150.2	220.4	169.3
1673	147	195	195.6		145.2	198.6	181.2		164.4	239.4	192.1		153.7	234.6	172.1
1674	144.4	196.4	187.5		145.2	200.9	182.2		164.3	254.9	190.8		154.4	230.2	170.4
1675	146.4	198.9	193.1		143.7	191.8	180.7		162.2	254.7	193.2		150.9	228.4	169.6
1676	146.1	196.6	191.2		145.6	193.8	179.7		160.8	260.7	193.4		153.6	227.2	171.9
1677	145.6	202.8	184.4		145.6	199.8	183.6		158.8	267.3	192.8		152.6	228.5	173.1
1678	146.1	201.1	190.2		145.9	192.2	184.4		162.8	261.3	189.9		150.4	229.4	169.2
1679	144.3	197	184.1		144	190	184.6		164.6	258.7	192.6		153.8	230.2	170
1680	146.1	204	193		146.6	192.5	181.2		166.4	264.8	189.1		151.9	229.2	170.9
1681	145.4	199.8	196.5		143.3	199.5	187.1		162.1	269.1	186.6		154.5	227.5	170.1
1682	148.1	198.8	192.2		147.6	189.4	186.3		163.2	270.6	187.1		151.4	229.4	169.5
1683	146.4	197.2	189.2		145.8	191.4	184.3		163.4	250.3	193.3		154.2	230.3	169.7
1684	146.9	200.9	196.4		144.2	187.2	188.6		162.3	251.5	188.6		151.4	227	172.2
1685	145.8	196	190.6		147.6	202.1	191.7		160.8	270.8	187.6		153	225.8	174.9
1686	147.3	199.9	187		148.2	186.5	189.6		160.6	268.6	187.1		152.5	228.2	175.1
1687	143.5	196.8	188		145.9	188.9	188.2		162	268.7	188.2		151.5	223.5	169.7
1688	145.6	207.5	183.1		148.1	192.9	187.5		162.4	273.2	185.7		153.1	225.5	172.6
1689	143.9	197.2	185		145.4	199.9	186.6		162.5	269.3	191		152.3	225.2	173.1
1690	145.8	203.8	186.6		148.9	188.1	181.3		163.3	268.2	187.5		153.7	227.4	171
1691	147.2	203.6	187.8		146.1	190.6	187		161.1	274.5	186.8		152.1	228.5	173.6
1692	147.1	196.9	177.9		147.3	196.9	188.6		164.5	250.1	188.5		151.8	225.5	172.2
1693	146	207.1	187.5		144.7	187	193.5		164.6	271.3	185.3		150.4	232.7	170.1
1694	144.4	205.1	196.1		148	194.1	188.1		163.5	266.5	183.2		154	233.4	172.2
1695	145.8	193.8	191.2		147	190.5	195.8		163.3	253.5	193.2		153.1	225.6	176.6
1696	146.7	204.9	186.4		144.9	195.4	186		161.3	265.8	188.5		153.7	229.3	173.9
1697	146.8	206.4	193.5		148.9	190.9	190		159.5	266.8	188.4		151.8	225.5	177.2
1698	147.7	199.5	178.4		147.1	188.2	186.2		162.3	263.3	191.8		151.5	224.2	177.9
1699	145.3	202	197		145.2	193.6	192.9		162.8	268.1	189.7		154.6	229.9	177.2
1700	147.1	187.9	184.9		146.4	193.1	190.9		162.7	267.3	187.3		153.9	225.6	179
1701	145.5	197.1	194.4		147.8	191	192.6		161.8	264.7	186.5		152.1	222.9	177.7
1702	145.1	204.5	193.5		146.4	200.8	195.6		160.6	260.2	190		152.1	229.8	177.1
1703	147.7	201.4	194.2		145.9	188.9	194.3		162.8	267.4	191		151.1	223.2	178.5
1704	145.7	202.9	194.1		146.9	191.5	194.2		162.5	262.8	192.1		150.4	223.6	183.2
1705	145.7	192.6	193		147	200.9	191.3		162.7	265.9	189.9		150.4	219.7	178
1706	145.6	197.8	191.5		145.2	190	190.9		165	259.4	194		153.1	227.2	178.6
1707	147	197.4	197.1		147	193.4	201.4		159.9	262.5	191.4		151.6	234.2	181.6
1708	146.1	197.9	194.2		148.7	196.2	193.6		165	261	195.7		151.5	223.9	182.1
1709	145.8	198.9	198		145.8	187.5	196.6		163.2	260.9	192.3		152.7	224.5	183.8
1710	147.9	193.1	201		146.1	191.1	197.3		161	258.9	191.3		151.5	222.1	181.2
1711	145.3	199.2	186.5		145.9	202.6	199.4		158.7	261.9	188.6		151.5	225.3	182.2
1712	145.3	195.4	201.6		145.5	193.9	197.1		162.1	259.6	189.2		152.6	221.6	180.6
1713	144.2	202.4	193.1		145.6	193.8	196.9		163.3	261.4	190.3		151.9	225.7	184.8
1714	145.5	202.9	189.1		145	192.6	198.5		164.9	255.7	188.5		154.6	222.9	189.5
1715	145.2	203	194.9		147.5	191.1	196.6		160.1	257.3	187		154.3	225.9	189.3
1716	148.1	197.9	204.1		146.2	191.9	197.1		161.1	255.9	188.5		151.2	227.4	193.3
1717	144.6	201.4	183.9		147.2	192.4	194		162	257.4	190.6		152.8	225.8	191.5
1718	144.3	198.9	192.4		145.2	192.9	190.5		162.6	254.4	189.8		151.8	224.8	196
1719	145.9	198.1	191.2		145.9	187.4	187.9		161.4	254.9	189.3		154.3	221.9	194
1720	145.4	199.2	201.8		147.4	191.6	191.6		161.7	255.9	188.2		153.1	219.6	196.1
1721	145.5	194.5	195		145.7	189.1	191.9		159.9	256.8	194.6		154.4	232.4	197
1722	145.8	193	201.5		146.9	197.1	185.1		159.7	257.7	188.4		151.5	224.2	200.1
1723	144.5	200.6	194.2		146.3	191.8	192.7		158.8	259.8	189.8		153.4	228.5	200
1724	145.9	205.6	194.8		144.6	185.8	186.4		161.3	260.6	190.8		156.1	234.9	198.8
1725	145.4	190.9	205.8		147.1	186.2	191.6		163.7	257.8	193.5		153.7	233.9	201.4
1726	143.9	192.8	204.8		145.1	202.8	190.6		160.8	261.6	190.1		153.7	226.1	206.1
1727	145.8	198.9	201		144.8	189.5	191.7		160	261.8	188.6		153.5	232.6	201.3
1728	148.7	198.4	209		142.6	197	190.5		161.5	264.2	191.7		152.8	230.2	204.9
1729	146.4	202.2	198.4		148	186	191.5		161.9	266.3	188.2		153.1	236.2	202.2
1730	146.1	201.6	195.2		145.8	181.2	191.4		162.6	244.5	188.9		155.2	225.8	197.8
1731	144.3	198	200.8		144.1	189.4	193.6		163	263.4	191.5		153	224.8	198
1732	146.4	192.5	197.9		143.2	190.1	191.3		162.6	265	193.7		153.4	228.4	206.8
1733	145	192	204		143.3	192.8	189.1		162.6	259.2	193.7		152.6	227.9	205.8
1734	144.4	193	193.8		143.2	199.6	195.8		160.7	258.8	195.5		151.7	225.6	207.1
1735	144.7	200.4	206.6		146.7	187.8	188		164	262.9	196.3		152.3	234.8	201.5
1736	146.2	189.1	205		145.1	191	191.5		159	258.2	199.2		154.1	230.2	208.1
1737	147.6	198.8	202.2		145.2	188.2	192.4		159.1	262.4	194.6		154.7	238.6	207.1
1738	148.2	196.8	206		144.9	191.9	188.6		162.3	257.5	197.5		151.9	229.8	202.4
1739	144.9	200.6	211		146	191.8	194		162.4	257.2	194.5		152.9	230.1	208.3
1740	147.2	199	210		147.5	194.1	188.6		158.3	263.9	191.7		153.2	228.8	208
1741	147	194.4	207.9		146.5	195.8	187.9		159.4	261.4	197.3		153.1	230.6	200.2
1742	144.6	197.9	209.5		146.1	187.9	188.2		162.6	263.7	202.3		152.2	230.4	205.1
1743	144.6	199.4	209.4		144.9	186.2	190.6		166.1	258.7	195.7		152.8	230.5	203.8
1744	146.6	199.5	208.9		145.9	185.5	191.5		162.4	266.2	200		153.1	232.6	204.3
1745	143.4	200.6	210.4		147.7	188.9	191.1		160.2	264.5	199.6		152.9	235.6	203.7
1746	148.2	194.6	219.4		143.2	185.2	188		158.4	265.7	194.1		152	224.2	202.5
1747	145.4	194.8	217		147.3	191.4	185.4		164.6	268.4	197.8		152.6	231.8	199.7
1748	145.3	190.8	210.1		148.1	188.9	191.1		160.4	264.7	203.9		152.9	232.9	199.6
1749	144.8	198.8	210.8		145	186.4	187.2		158.3	265	204.5		153.2	222.8	201.6
1750	146.3	195.8	210		142.5	196.5	189.2		162.4	262.3	197.9		154.2	228.4	193.4
1751	144.5	193.1	211.4		147.7	189.1	186.6		162.8	262.9	204.4		152.6	238.8	197.7
1752	146.5	199.2	208		147.6	191.2	192.8		161.2	263.9	204.4		153.5	226.6	197.5
1753	144	195.1	207.4		144.9	192.6	190.2		162	257.8	200.5		154.7	230.2	197.9
1754	146.3	198.6	209.8		146.9	195	188.6		161.9	249	202.1		153.9	226.7	197.6
1755	145.4	200.9	207.1		145.7	194	189		159.8	267.5	202		149.6	234.5	197.2
1756	145	203.1	209.4		146.7	197.8	186.4		156.8	251.4	205.8		153	230.8	193.7
1757	146.9	191.8	214.1		143.8	195.5	190		162.3	269.3	204.3		151.1	232.1	191.2
1758	146.2	200.5	213.8		143.6	188.4	188.6		162.8	263.1	205.8		151	231	189.1
1759	144.6	196	213		144.6	196.4	186.2		160	265.1	200.1		150.9	239.9	190.8
1760	145.1	199.6	216.5		146.5	192	187.4		160.5	265.9	204.1		153.6	233.9	189.6
1761	146.7	193.1	221.4		145.6	190.6	183.4		164.9	270.2	205.4		151.6	226.5	187.6
1762	146.9	192.5	225.6		145.3	190.8	182.4		162.7	263.5	200		152.7	229.6	184.1
1763	146.4	203.6	221		144.8	191.2	179.1		160.4	262.9	207.4		150.9	231.9	187.9
1764	146.4	191.5	218.2		144.8	185.9	182.8		160.4	267.7	204.3		153.3	231.7	185.6
1765	145.5	204	214.2		147.2	187.5	188.1		164.3	269.7	210.3		152.5	224.4	186.3
1766	146.7	192.9	218		144.3	190.4	186		162.9	262.9	205.1		152.4	229.8	184.7
1767	146.2	194.8	216.2		144.6	187.2	181.1		161.3	265	210.4		152.6	225.4	184.1
1768	145.9	199.5	217.2		141.6	192.9	183.6		163.1	262.3	208.8		151	229.8	187.9
1769	145.5	197.5	219.8		145.5	190.5	186.4		160.3	263.3	205.2		154.4	226.2	187.7
1770	143.4	203.5	218.4		145.2	187.6	180.4		162.7	258.9	204.8		153.2	229.6	184.8
1771	145.1	201.1	214.6		146.1	183	179.9		163.2	260.8	205.9		152.5	230.5	182.7
1772	144.2	194.8	219.2		146.6	186.8	184.9		161.8	261.7	202.8		152	226.4	180.6
1773	146.6	200	208.9		146.1	190	180.5		160.7	261	203.7		153.3	228.9	181.5
1774	147.2	193.8	214.1		145.3	194.8	178.9		163.3	263.4	206.8		153.5	224.4	181.6
1775	145.2	198.8	221.5		144.1	181.5	181.3		164.8	259.8	205.2		153.9	229.1	178.5
1776	144.7	195.9	208.9		145.1	186.6	179.9		163	261.7	204.4		152	222.6	180.1
1777	146.2	200.4	215.8		146	191.5	181.2		162.5	258.2	208.6		151.2	225.3	179.7
1778	145.7	200.1	204.4		145.2	194.4	176.1		160.6	258.2	207.5		153.2	223.5	179.5
1779	144.9	192.8	210.1		144.5	186.5	181.6		160.2	263.8	208.7		151	223.7	179.2
1780	147.8	198.9	204.2		144.6	184.8	179.6		162.4	259.6	204.6		151.9	231.4	181.9
1781	146.6	196	211.6		146.6	198.2	179.1		161.9	260.4	204.2		152.4	220	179.1
1782	145.4	194.1	207.6		146.5	185.2	177.1		160.9	256.6	202		153.2	223.7	182.9
1783	145.7	202.1	200.2		145.6	185.9	179.2		164.2	257.8	197.7		154.6	225.1	180.9
1784	147.3	193.5	203		144.8	186.5	177.9		161.4	259.2	196.4		151.4	221.2	180.7
1785	145.3	203.2	202.4		144.1	190.1	174.2		160.4	256.6	196.9		153.4	226.2	180.8
1786	146.3	194.6	198.9		144.1	193.2	174.2		162.4	258.9	198		152.5	221.6	180.5
1787	146	194.1	201		142.6	192.4	181.5		164	260.3	193.2		152	225.2	184.5
1788	147.1	198.2	195.1		143.2	185.2	176.1		164	257.8	198.6		152.8	225.5	179.9
1789	146	197.8	197.9		146.7	185.1	182.5		160.9	249.8	189.4		151.2	223.5	182.8
1790	146.3	195.2	199.1		143.5	195.2	184.6		162.8	260.8	192.4		153.8	218.7	179.7
1791	148.1	198	191.2		147.8	190.6	183.2		164.5	263.7	193.9		152.8	219	179.9
1792	148.1	200.4	202.2		144.8	185.2	187.2		161.5	267	195.5		152	223.8	180.2
1793	145.8	204.2	200.2		146.7	193.8	178.2		162.6	258.2	190.9		152.1	225.8	179.6
1794	147.1	198.9	196.9		145.6	193.9	188.1		160.7	264.8	190.5		152.2	217.1	180.5
1795	148	200.2	198.5		144.4	188.6	177		165.9	260	190.1		152.2	219.8	180.2
1796	149	194.6	196		144.4	186	180.2		164.7	264.1	187		153.7	222.5	176.8
1797	145.9	197.2	191.9		144.5	194.1	182.1		168.5	251.3	189.5		152.6	222.8	179.5
1798	145.6	197.6	195.9		143.2	187.4	185.3		163.5	257.3	188.3		150.7	218.2	177.5
1799	144	194.9	192.4		143	185.4	187.2		161.1	260.3	188.5		151.5	221.9	179.5
1800	145.5	196.8	193.1		141.8	183	187.9		161.6	262.8	191.9		153.6	220.8	174.6
1801	148	197.4	189.4		141.7	182.8	187.3		164.6	264.9	188.3		152.3	221.3	176.2
1802	145.4	195.4	191.8		142.8	193.2	188.4		159.6	266	190.9		154	220.4	172
1803	145.3	202.8	192.6		140.9	184.9	190.6		160.7	268.1	189.9		151.1	223.1	176.2
1804	146.1	195.5	195.4		144.6	184.9	187.5		162.5	265.9	188.2		151.1	226.2	175
1805	145.6	193.2	195.4		144.7	181.2	188.3		161.4	269.5	190.2		154.2	222.1	175.1
1806	147	197.6	195.9		145.4	188.6	185.4		164.5	270.1	187.3		152.6	222.3	175.9
1807	146.1	200	209.9		144.6	193.5	192.9		163.5	271.2	190.2		151.9	224.8	176.1
1808	146.5	200.8	199.8		144	190.1	189.7		163	273	187.4		153.2	225.2	172.4
1809	147.9	201.6	199.8		144.5	181.9	187.4		164.2	272.6	190		151.8	221.8	175.9
1810	146.1	199.1	195.6		141.4	192.6	187.1		163.2	274	188.9		153.1	217.8	170.6
1811	147.2	198	187.5		144.5	185.9	200.2		164.6	280.2	191.2		150.3	225.1	171.5
1812	146.7	201.4	187.5		143.7	188.6	193.9		161.8	273.3	190.2		153.1	217.8	173.4
1813	147.4	209.6	188.5		140.1	191.8	188.6		159.9	275.8	194.5		151.5	226.3	174.1
1814	144	194.9	195.2		143.5	191.6	193.8		161.2	276.1	194		153.6	215	172.1
1815	145.9	210.4	192.9		143.9	191.4	194.4		165.4	280.9	190		151.1	226.7	171.2
1816	144.7	199.8	189		141.1	184.6	194.2		160.4	278.5	193.9		151.9	222	170.3
1817	147.8	203.1	191.4		143.3	193.8	196.2		162.5	276.8	195.6		152.1	217.6	172.2
1818	145.3	202.1	180.5		144.3	190.9	189.9		165.9	280	192.4		152.8	221.9	171.6
1819	144.5	198.1	190.1		143.2	185	187.1		167.3	264.5	194.3		153.1	228.3	173.6
1820	147.7	197.8	183.9		142.9	192.2	192.4		159.3	261.9	192.2		151.5	225.4	170.9
1821	146.3	200.2	180.9		143.7	185.5	188.6		159.8	273.3	193.7		152.3	226.4	171.5
1822	145.5	200.1	180.2		143.1	190.4	187.9		161.3	273.5	188.1		150.7	229.9	173.8
1823	145.4	201.6	183.1		144	187.9	187.6		160.6	272.1	192		153.7	226.6	170.5
1824	144.5	188.8	180.5		143.9	189.2	190.6		162.1	267.1	189		151.2	221.4	172.4
1825	145.8	198.4	182		145.9	192.5	188.1		159.2	273.9	189.8		150.4	218.7	175.4
1826	145.6	198.4	183.5		141.4	186.2	187.5		163.5	282.6	189.2		150.7	221.8	172.1
1827	147.9	207.5	172.8		143.7	193.4	189.4		160.3	264.8	187.3		151.3	223.9	173.1
1828	146.2	198.1	187		142.3	190.2	188.3		161.7	274.8	186.6		152.7	224.6	173.1
1829	147.4	202.6	178.9		144.2	191.9	183.3		159.7	276.6	192.6		153.1	222.4	174.6
1830	147.5	201.4	185.5		144.6	183.4	187.2		161.7	275.8	183.1		152.5	229.2	174.7
1831	146.2	204.5	178.6		143.6	187.1	187.4		164.2	280.7	188.5		152	224.1	170.7
1832	148.1	200.9	177.4		144.8	190.4	186.6		164.5	278.8	187.8		152.1	219.8	171.4
1833	144.3	203.1	180.2		144.4	187.6	186		163.2	279.5	188.1		152	219.9	173.7
1834	146.1	197.4	176.9		143.8	188.4	184.6		162.8	275.7	186.6		152.3	220	172
1835	146	203.1	175.8		146.2	199.1	179.6		159.9	278.5	190.4		150.6	226	171.4
1836	147.5	192.9	183		145.4	185.9	179.9		162.5	276.7	185.6		151.9	221.4	170.6
1837	146.3	197.8	174.6		145.4	189	180.3		158.8	275.7	185.9		149.4	221.7	170.2
1838	145.3	193.8	178.6		141.5	188	180.8		160.3	275.1	190.1		153.1	222.6	174.4
1839	145.1	211.4	176.9		143.6	182.9	185.8		158.3	274.1	182.1		151	224.5	170.2
1840	145.6	200	178.6		144.4	186.8	182.6		162.3	262.8	186.6		151.7	224.2	173.3
1841	145.8	199.2	174		143.1	191.5	181.4		161.2	271	187.3		153.9	222.6	171.2
1842	146.6	197.4	183.5		141.8	184.4	184.1		159	273.3	183.9		153.4	221.8	171.6
1843	147.5	202.6	178.4		143.7	193.9	177.4		162.2	273.5	186.4		151.8	222.4	170.3
1844	145.8	204.6	177.8		144.3	187.4	179.5		161.2	272.7	184.6		151.8	226.1	171.2
1845	147.1	194.2	177.1		141.6	181.8	182.9		162.5	271.2	182.2		149.4	219.1	170.9
1846	146.2	196.9	182.8		144.6	190.5	182.2		160.7	274.6	182.7		149.7	220.3	169.6
1847	147	203.8	178.8		140.1	184.4	175.4		159.1	274.8	182		150.1	223.5	169.9
1848	146	201.9	171.6		142.5	186.1	181.2		159.9	278	182.6		153.8	216.7	171.6
1849	146.3	200.5	175.9		143.9	182.6	184.9		157.5	276	184.3		150.4	228.4	173.4
1850	147.7	198.6	184.2		142.9	188	184.9		161.5	279.8	186.4		150.9	221.8	175
1851	147.4	197	181		144.3	184.9	183.6		157.5	281.6	181.5		151.4	224.9	170.6
1852	147.8	191.4	181.4		142.8	184.2	185.1		161.3	276.2	182.7		151	218.5	175.3
1853	146.6	193.4	177.8		141.7	187.6	184.3		162	277.7	185.3		153.1	220.4	173.1
1854	144.7	195.6	183.8		141.4	184.8	183.5		158.4	276.8	182.2		150.8	220.5	171.2
1855	145.7	199.4	187.1		144.1	185.8	179.5		161.6	278.8	187.2		151.2	221.5	172.2
1856	147.6	195.2	193.4		144.4	187	182.2		158.6	275.4	185.8		148.7	221.3	172.1
1857	146.8	204.6	185.6		143.5	196.9	182.4		161	278.4	183.4		151.6	220.9	170.7
1858	146.3	200.8	186.9		144.9	195.6	179.9		161.2	277.3	188.8		151.7	220.4	173.8
1859	148.8	205.9	192.4		142.3	186.6	185.5		162.5	275.3	188.1		151.6	220.6	172.9
1860	146.6	190.2	195.5		144.2	185.9	183.1		160.7	277.4	188.6		152.2	222.1	175.5
1861	143.8	203.2	194.6		144.4	187	179.4		160.5	279.6	190.8		152.1	227.2	171.7
1862	146	201.9	185.4		145.1	190.1	182.2		160.2	275.8	185.4		151.2	219.4	172.2
1863	144.3	199	188.5		143.9	188.9	182.6		158.5	274	192.9		151.7	223.3	174.6
1864	147.3	200	194.8		142.7	181.4	185.3		160.8	274.2	193.7		150.1	221.6	172.6
1865	148.4	194	192.5		145.1	186	182.1		160.5	274.9	189.1		152.1	221.9	172.7
1866	146.2	195.6	201.4		144.1	190.2	180.6		158.8	276.3	188.7		149.8	226.4	174.4
1867	147.7	194.6	194.4		146.2	185.4	177.3		156.9	259.3	186.9		152.2	228.1	170.4
1868	144.9	195.6	196.4		144.9	195.2	178.9		160.9	274.9	191.6		152	222.6	168.9
1869	145.5	206.6	191.1		144.7	188.2	181.4		158	264.4	187.7		152.7	225.1	170.3
1870	146.6	206	199.9		144.3	190.2	177.6		159	266.8	187.2		150.3	217.9	171
1871	147.8	204.5	191.9		141.1	196.6	180.8		159.9	265.5	185.4		153.4	223.4	169.1
1872	147.9	194.9	198.2		143.9	181.1	176		156.2	261.8	184.3		149.8	221.2	174.7
1873	148.3	208	196.4		145.6	185.2	176.8		161.6	256.3	184.4		150.2	218.2	174.2
1874	146.8	199.9	207.8		147	189	178.9		159.6	268.1	187.7		151.3	220.8	168.7
1875	146.4	205.9	206.9		141.8	193.2	173.4		160.7	266.8	189.6		150.9	217.8	169.6
1876	148.4	198.6	205.2		145.4	194.5	172.7		164.4	266.9	193.3		152.2	223.1	171
1877	147	193	204.5		142.4	187.9	170.1		162.8	253.9	189.5		153.9	219.9	171.7
1878	146.9	203.5	208.6		144.8	195.1	172.4		158.3	269.8	191.8		153.6	212.5	177.6
1879	147.4	205.5	207.6		144.6	190.5	172.3		159.5	267.9	189.1		152.5	221.1	178.3
1880	148	205.5	213.1		141.9	185.9	174.3		159.8	272.4	192.1		155.1	223.2	174.5
1881	145.9	202	196.6		142.1	181.1	171.1		160.2	270.5	196.8		153.2	225.9	173.1
1882	145.9	201.6	212.2		144.1	185.9	180.3		159.8	273.8	194.2		152.6	227.2	173.8
1883	145.6	213.4	197.5		146.5	181.9	172.5		158.7	277.7	198.1		150.9	227.4	171.8
1884	146.7	200.1	201.8		140.9	193.9	177.6		162.8	271.9	201.2		148.8	222.9	171
1885	146.5	196.6	204		144.1	191.4	176.4		162.5	277	197.6		150.5	225.3	173.3
1886	147.9	201.4	199.9		143.8	185	179.1		160.4	281.8	196.4		151.9	219.3	172.3
1887	146.1	199.6	203.2		143.8	191.8	172.8		160.4	281	193.7		152.6	229.2	176.2
1888	146.5	210.4	201.6		144.4	187.5	172.2		161.6	275.4	198.1		152	221.2	171.1
1889	148.4	197.4	193.4		145.3	187.8	179.9		164.7	274.6	196.7		150.6	221.4	172
1890	147.4	205	192.9		144.1	190.2	171.4		162.8	272.8	199.4		151.3	223.2	172.5
1891	145.8	204.1	195.8		144.6	187.6	173.9		158.2	270.4	202.3		151.3	224.4	172.4
1892	148.1	206.6	200.4		144.1	188.8	175.9		160.2	268.2	196		151.8	221.7	172.4
1893	147.9	199.6	203.9		144.3	186.2	178.6		162.5	266.8	204.3		150.4	220	170.1
1894	147	198.6	196.8		142.1	187	175		161.8	271.7	201		150.7	216.1	168.6
1895	149.3	195.9	197.2		144.4	188.1	179.5		159.3	260.9	200.4		150.9	224.2	173.3
1896	146.8	202.5	199.4		146.8	194.5	181.1		159.9	264.7	200.3		151.3	214.6	167.5
1897	147.4	200.9	195.4		143.2	194.4	174.5		159.5	267.1	197.5		152.2	220.2	167.4
1898	146.7	205.1	195.5		142.2	177.4	173.6		159.9	265.6	199		151.5	223.4	167.6
1899	147.7	205.9	200.6		141.9	194	174.9		159.1	260.5	204.4		151.1	221.4	169.2
1900	146.7	207.6	196.4		145	189.9	179.3		160	260	202.5		150.7	222.7	167.1
1901	148.9	197.4	197.9		143.3	192.5	171.5		163.9	256.2	201.1		153.1	222.1	169.4
1902	146.8	197.8	194.8		142.9	186.1	183		159.3	254.1	197.8		152.8	217.9	170.9
1903	148.1	195.4	192.5		144.8	190.2	176.8		158.6	258.4	198.3		150.3	221.5	168.8
1904	148.6	202.8	196.1		143.2	195.8	178.4		160.6	261.4	202.3		150.6	221.7	169.6
1905	147.9	203.8	199.5		144.3	186.2	182.2		158.3	253.1	198.1		152	218.9	169.6
1906	146.4	204.8	191.9		142.8	188	182.9		157.3	255.2	204		152.6	221.6	170.1
1907	145.3	209.4	193.4		146	191.8	180.6		163.1	262	200.2		152.1	216.4	170.5
1908	148.8	211.9	185.9		144.4	185.5	182.1		161.2	261.2	203.8		152.2	225.3	167.9
1909	146	203.4	194.6		143.3	192.5	181.1		160.3	260.8	202.8		151.8	219.6	170.2
1910	147.8	195.5	187		142.2	183.1	178.8		162.4	265.5	204.8		151.5	220.9	173.8
1911	147.4	196	182.1		144.4	191.5	184.8		160.1	247.2	198.2		153.9	221.8	170.6
1912	146.5	200.6	190.2		143.9	194.2	178		157.7	263.2	200.9		152.6	217.1	169.9
1913	148.9	206.5	188.4		141.7	186.9	175.5		159.1	264.2	201.3		151.3	218.5	172.4
1914	147.2	208.9	193.2		142.8	185.9	174.4		158.6	262	203.2		151.4	214.4	174.1
1915	146.4	200.1	189.2		142.9	183.1	175.9		160.4	263.5	204.5		150.3	218.2	169.7
1916	147.9	204.9	181.8		142.2	192.9	178.1		160.4	267	204.3		153.6	218.2	171.4
1917	148.5	205.5	190.5		143.2	184.6	174.5		160.5	264.2	204.2		150.3	220.1	173.1
1918	147.4	206.6	189.6		146	187.1	177.8		161.3	264.1	201.3		152.6	217.8	173.4
1919	147.6	203.4	184		146.1	189.4	169.4		156.6	263.7	204.7		155.1	221.9	170.1
1920	148.1	197.1	192.5		141.4	183.9	170.6		155.2	269.8	202.8		152.6	216.9	171.5
1921	147.7	201.1	192.4		144.1	185.6	173		159.9	266.2	208.8		152	221.2	168.2
1922	149.9	201	186.9		140.2	198.9	167.4		158.2	270.1	205.2		152.7	224.3	174.9
1923	147.1	202	185.1		143	184.4	173.6		158.4	270	202.1		153.4	224.7	174.4
1924	147	207.8	186.9		143.2	183.4	171		159.5	268.2	198.4		152.8	218.5	175.4
1925	149.2	190.4	184.5		144.8	187.4	172.4		161	271.5	198.1		152.3	217.9	170.7
1926	148.2	194.5	180.9		142.9	185.2	173.1		159.4	267.9	196		152.1	226.8	172
1927	148.4	203.2	180.5		139.9	180.4	166.6		160.3	272.2	197.3		152.8	222.5	173.6
1928	148	194.6	180.5		142.5	184	168.1		166.5	269.6	195.5		153.8	223.4	171.6
1929	146.8	203.2	185.1		143.5	183.6	169.1		159.2	265.5	195.2		152.3	223.1	172.1
1930	148.9	199	181.6		142.9	190	176.2		161.9	269.9	195.4		152.4	225.5	173.5
1931	147.3	204.5	183		142.4	185.8	173.2		158.4	267	191.6		154.8	224.9	170.6
1932	146.9	205.8	180.9		143.6	186.9	168.6		161.2	265.5	190.3		153.4	223.5	172.9
1933	145.6	200.8	182.6		143.9	184.5	171.4		159	270.6	189.8		152.2	228	168.3
1934	148	200.1	186.9		143.2	183.4	174.1		159.2	269.1	184.8		152.3	229.2	171.6
1935	147.3	198.4	185.1		146	192.8	173.6		162.2	273.4	193.2		151.8	212.8	169
1936	145.7	197.8	193		143.2	189.8	168.2		161.6	272.2	191.8		152.5	222.8	173.1
1937	148.5	201.6	180.4		143.8	186.6	170.9		160.4	268.2	188.1		152.5	217.6	169.4
1938	147	204.1	184.2		144.6	185.9	169.8		157.5	272.9	189.8		154.1	224.1	174.6
1939	147.4	199.5	178		142.2	191.1	171.3		161.7	269.5	186.2		152.3	221.7	173.7
1940	148.6	206.8	186.1		145.2	192.6	173.2		158.1	272.4	187.2		153.5	223.1	169
1941	147.7	199.6	186.9		144.4	182	172.9		159.6	275.8	190.2		150.4	222.5	173.1
1942	145.8	201	180.9		140.4	183.9	167.8		160.4	272.5	182.2		151.2	222	170.6
1943	146.1	205.6	186.2		143	191.1	170.1		160.3	273.6	183.8		153.4	221	174.5
1944	145.7	203.2	175.8		145.8	184.1	166.7		165.1	274.2	185.3		151.7	225.4	172.1
1945	149.1	196	190.5		141.8	190.4	170.4		161.4	278.2	182.7		152.4	218.9	171.8
1946	147	192.2	181.2		141.3	190	169.4		158.9	270.9	184.3		153	228	170.9
1947	146.8	204.8	182.9		143.4	195.1	168.8		161	273.2	186.3		154.1	218.3	169
1948	147.3	205	186.6		142.3	184.4	168.4		160.9	275.2	185.2		150.6	221.5	174.1
1949	149.3	210.1	180		142.1	195.9	173.5		163.5	271	181.9		151.8	219.1	173.4
1950	148.2	197.5	185.4		143.8	188.4	175.6		162.4	270.4	179.3		153	229	174.7
1951	146	203	184.5		143.8	193.2	170.7		160	269	184.2		150.1	222.4	170.4
1952	147.7	197.2	189.2		144.8	193	169.8		159.7	273.4	181.1		151.9	219.4	175.6
1953	146.3	203.4	177.5		143.6	184	167.9		159.6	268.8	183.9		153.8	223.8	173.7
1954	146.5	200.5	182		142.3	182.2	175.1		160	275.2	185.1		151.9	225.7	173
1955	147.4	202.1	187.6		145.6	184.9	172.6		162.9	276.2	182.5		153	224.5	174.3
1956	147	204	177.9		145.7	183.4	173.6		161	269.9	182.2		151.4	218.1	174.8
1957	145.8	201.5	176.6		144.6	186.9	173.1		163.5	269	181.5		152.9	221.9	170.3
1958	145	207	177.4		143.5	182.2	172.2		160.2	272.5	179.9		151.8	218.8	171.6
1959	147.1	202.8	177.5		143.2	182.1	173.9		161.9	267.9	178.5		152.6	226.5	175.4
1960	148.1	203.9	181.1		143.2	184.4	176.1		162.8	272	176.6		152.6	220.4	176.6
1961	144.9	208.8	186.8		143.9	190.6	171.1		164.1	273.1	178.1		154.7	221.8	172.9
1962	146.3	196	175.4		141.6	194.5	172		166.3	278.4	180.7		153	224.1	174.7
1963	147.3	202.9	177.1		144.6	196.2	172.8		162.3	274.8	177.5		153.4	223.9	176.1
1964	144.9	202.6	178		143.7	195.1	173.8		162.2	264.8	177.7		151.5	219.8	173
1965	146.8	201.1	173		143.6	184.9	174.4		161.8	270.6	176.2		152.4	217.5	177.1
1966	145.4	207	174.5		145	190	169.2		162.5	266.3	179.2		149.9	220.1	177.1
1967	145.9	191.6	182.2		143.9	190.6	174.5		162.5	269.9	179.2		152.2	226.6	173.5
1968	146.1	199.6	175.1		146.3	190.1	172.9		162.9	269.5	181.7		153.5	213.6	178.3
1969	146.4	203.2	182.6		144.6	185.4	174.2		164.7	272.4	179.4		151.7	220.9	175.4
1970	145.9	201.1	180.5		143.5	183	175.2		162	264.3	176.5		152	217.2	176.5
1971	146.1	196.2	173.4		144.5	192.6	173.6		162.2	269.2	180.3		152.6	219.8	176.8
1972	148.7	197.8	179.8		141.3	189.5	169.9		159	266	177.8		151.8	216.5	177.1
1973	146.8	190	178.5		142.2	187	173.9		161	264.8	178.8		152.8	219.4	175.3
1974	146.1	202.8	172.5		145.1	193.2	174		160.9	265.4	177.7		153.2	218.4	175.6
1975	145.1	197.2	185.8		147.1	191.1	178.5		160.7	259.4	179.4		151.2	218.3	173.9
1976	147.1	198	175.5		145.6	195.4	175.9		164.2	263.9	179.7		152.9	219.2	175.6
1977	145.3	198.9	186.1		146.2	187.4	178.4		164.6	255.2	174.3		153.1	222.5	177.6
1978	147.7	191.8	179.8		142.6	190.6	177.2		164.5	263.8	181.1		152.6	222.8	175.7
1979	146.3	199.2	175.8		145.3	190.2	177.9		160.3	263.1	177		151.4	219.2	175.2
1980	145.8	205.8	172.8		144.2	186.5	180.3		163.8	258.2	178.2		152.4	221.8	174.8
1981	147	199	180.9		143.3	185.1	179.2		164.2	261.3	178		153.1	222.6	176.4
1982	147.1	199.1	171.9		144.7	186.9	183.6		166.8	262	178.5		151.9	218.1	176
1983	145.6	198.8	172.5		142	194.2	181.9		163.8	259.2	180.1		152.8	222.8	177.7
1984	145.9	196.6	180.5		143.1	191.8	177.6		163.8	263.1	180.2		153.6	224.4	176.7
1985	146.9	202	173.6		141.1	197.9	182.6		161.2	265.9	177.4		151.2	220.2	175.7
1986	148.2	197.9	174.1		143.8	189.6	185.8		162.8	263.4	176.5		151.3	221.5	176.5
1987	146.6	197.6	182.2		142.4	186.9	182.4		161.9	263.1	175.2		152.8	224.2	177.2
1988	146.6	196	190.4		145.2	186.4	187.8		162.7	263.7	176.1		153.2	224.1	174.4
1989	147.3	195.9	180.6		144.8	187.4	188.8		159.8	261.5	175.4		152.2	225.8	174.3
1990	148.1	201.4	181.5		145.3	187	186.8		163.5	263	177.1		154.6	226.9	171.2
1991	147.3	197.6	183		144.9	185.4	189.9		163.5	265.3	173.9		153.2	223.3	174.3
1992	149	198.6	178.5		143.9	194.1	189.3		159.9	263.1	178.3		152.9	223.1	173.8
1993	145.5	201.5	186.1		146.5	189.5	190.6		161.5	261.1	176.5		153.3	220.1	173.1
1994	147.2	198.4	181.9		147.5	184.4	188.7		160.6	265.1	173.5		152.5	227.1	174.9
1995	148.7	207.9	179		142.6	185.4	191.1		163.7	268.5	175.7		152.5	221.1	172.8
1996	145.9	203.6	183.6		143.6	186.1	192.1		162.1	264.2	172.8		153.4	222.2	173.5
[truncated: 2,804 more rows]

## Sheet: AIA,AWA,ASK to 11.5 nM dia
Figure 5S-2A
Stimulus	11.5 nM dia
	Video 1				Video 2				Video 3
Frame (Pulse at frame 3000, 3600, 4200)	AIA	AWA	ASK		AIA	AWA	ASK		AIA	AWA	ASK
1	171.2	250.8	433.9		170.4	242.4	251.6		193.7	378.2	265.8
2	169.4	244.6	425.1		166.2	245.9	247.1		193.9	363.5	261.8
3	168.8	244.4	439.9		163.2	243.1	243.7		193.2	352.6	252.7
4	165.8	243.1	413.1		163.4	239.1	241.6		190.6	350.8	261.8
5	167.3	252.8	407.4		164.5	239.3	239.3		190.2	351.8	254.2
6	167.6	247.2	412.1		165.4	250.1	233.6		191	351.8	256.3
7	164.2	238.6	410.8		166.6	240.5	238.7		190.4	339.3	256.2
8	165.8	240.4	415.2		164.5	243.2	236.5		187.5	342.4	258.3
9	162.3	239.8	404.4		163.8	238.8	239.9		188.3	319.8	241
10	165	238.3	398.6		164.1	242.7	231.7		188.9	339.8	249.7
11	163.9	238.8	403.8		164.1	239.4	234.6		186.7	327.6	254.9
12	162.2	240.2	387.2		161.5	242.1	230.9		185.7	336	238.2
13	162.5	240.4	394.7		163.9	238.2	229.1		187.5	325.6	247.7
14	161.6	232.8	389.1		163.7	240.3	229.6		184.2	330.1	243.3
15	162.2	241.4	389.9		161.3	236.5	226.1		185	311.3	245.1
16	161.2	234.8	388.5		158.3	232.4	223.6		183.8	323.3	239.2
17	164	237.1	388.6		160.3	231.4	225.5		185.6	322.5	238
18	161.6	232.7	390.9		162	239.1	224.4		183.4	324.1	232.3
19	160.9	238.2	384.1		159.5	240.4	221.7		183.7	324.1	233.2
20	160.7	235.3	387.2		159.4	233.6	221.5		183.1	319.9	234.8
21	159.5	232.3	380.4		163.8	236.6	219.4		181.6	320.8	229
22	162.6	234.8	380.6		164	240.2	217.7		181.3	316.2	233.6
23	160.6	231.4	367.8		160.1	230.9	222.2		182.3	312.1	236.2
24	159.8	230.8	379.6		159.9	229.6	218.6		182.2	314.8	229.4
25	159.6	226.6	380.7		161.2	235.1	221.3		182.1	315.8	230.9
26	160.1	226.6	380.6		162.1	234.1	219.7		179.5	300.8	220.2
27	159.9	226	385.1		161.2	235.9	221.6		181.1	313.8	230
28	161	226.3	388.4		162.8	240.1	219.5		180.9	313.4	222.4
29	161.8	227.6	386.4		162.3	236.1	217.1		181.2	308	224.8
30	158.6	234.8	382.2		160.1	238.8	221.7		184.6	296.8	222.3
31	158.3	225.4	375.9		163.1	236.4	223.9		180.2	307.5	222.9
32	159.6	229.4	385		162.3	241.7	228.3		183	306.7	220.4
33	158.8	223.7	384.1		160.5	240.4	228		184.5	289.5	212.7
34	159.9	227.7	371.9		163.1	239.7	234.3		182	302.3	218.9
35	161.7	226.9	378.1		161.9	238.6	228.9		182.6	299.3	220.8
36	160.7	223.1	376.1		161.2	244.2	233.3		181.1	308.8	227.9
37	160.3	234.7	381.9		159.2	244.1	226.8		181.3	307.6	215.3
38	157.1	225.8	368.1		160.8	241.4	233.2		184	310.8	217.8
39	159	224.5	362.6		160.3	240.2	237.3		178.4	298	221.8
40	157.2	233.2	386.1		161.1	235.9	237.6		179.5	297.4	210.1
41	158.2	226.2	351.6		160.6	241.4	238.9		181	293.4	204.8
42	158.4	232	356.4		160.3	244.5	239.6		179.3	292.6	201.6
43	158.7	233.9	354.6		159.2	239.8	236.4		178.2	296	208.8
44	158.7	230.1	354.6		158.6	238.1	242.8		175.7	295.2	204.8
45	160.7	227.6	370.8		158.7	237.4	238.9		176.9	294.2	201.1
46	159.9	227.4	361.6		158	238.2	238.9		176.3	288.5	203.3
47	159.7	227.2	360		158.3	240.1	240		177.7	290.3	197.7
48	160.4	225.3	362.9		157.8	235.9	238.1		178.5	282	207.5
49	160.6	229.9	350.7		157.7	232.9	236.1		176.6	290.9	207.9
50	160.6	233.8	360.9		159.1	235.4	238.4		177	285.8	197.6
51	160.2	227.9	342.8		158.6	232.9	241.1		177.8	287.8	205.6
52	160.3	235.3	362.9		157.6	233.9	238.9		174.6	293.2	204.7
53	158.2	225.6	352.8		159.2	234.1	241.1		175.2	284.4	192.8
54	159.8	228	354.1		157.2	234.9	241.2		174.7	287.8	195.7
55	157.8	233.6	351.4		160.7	238.2	245.9		177.5	284.7	198.6
56	160.4	226.6	348.2		159	228.5	238.3		178.9	272.1	200.8
57	159.5	232.7	349.6		160.8	230.8	241.7		179.6	278.4	201.2
58	157.4	228.5	346.8		158.1	233.1	242.5		176.7	281.2	203.8
59	157.4	234.2	350.1		158.7	235.6	242.9		177.9	287.8	201.3
60	158.2	230.6	353		159.8	238.2	247.1		176.1	275.8	198.6
61	157	231.1	361.4		161.5	231.6	251.2		174.4	284.2	199.2
62	158.7	232.8	342.4		157.9	234.8	250.7		173.3	277.8	202.3
63	158.8	233.8	347.9		159.4	237.5	250.8		178	278.9	204.3
64	158.7	227.3	353.9		157.9	235.6	258.8		177.1	280.8	208.8
65	159.2	235.2	365.2		158.9	234.6	260.1		173.7	279.8	192.5
66	157.6	231.4	356.1		157.5	232.8	263.8		178.3	283.3	198.2
67	157.7	228.2	362		158.4	237.1	259.5		178.1	275.8	200.6
68	156.3	230.9	361.9		160	238.6	265.7		175.1	278.8	195.5
69	157.1	227.8	353.1		158.5	238.4	272.1		175.7	269.7	204.7
70	157.9	227.8	356.5		158.7	244.3	266.3		172.9	276.3	203.5
71	156.6	226.9	355.2		160.6	233.6	267		175.5	281.2	195.4
72	154.8	220.6	342.2		160.3	241.3	262.4		175	284.2	192.8
73	155.9	227.8	349.7		160	240.9	268.5		175.5	279.8	192.4
74	155.1	228.5	350.8		162.3	239.6	266.4		175.2	263.9	189.3
75	155.9	226.4	351.8		158.2	240.2	263.7		175.7	283.8	193.4
76	156.3	232.2	354.4		159.1	246.1	264.9		175	273.1	189.4
77	158.8	233.4	352.7		157.8	242.2	268.1		176.7	277.9	196.2
78	156.5	232.8	346.8		157.6	247.4	263.1		175.1	287.9	201.8
79	157.2	225	351.7		161.1	243.8	267.4		175	282.9	196.2
80	155.8	229.1	350.5		160.1	249.8	264.5		176.7	278.9	194.8
81	157.3	229.5	347.4		158.9	250.4	265.2		173.9	282	200.7
82	158.3	228.3	340		158.3	245.9	264.7		172.6	282.6	196.5
83	153.8	229.2	343.1		159.3	248.1	272.8		177	275.9	198.5
84	158.1	226.8	345.4		159.1	257.9	275.1		175.9	283.5	196.2
85	158.2	231.2	346.2		160.7	259.8	274.3		174.9	264.4	190.5
86	156.5	232.8	342.9		159.9	265.6	272.6		174.6	278.7	197.1
87	156.2	231.6	348.1		162.8	268.8	264.9		176.7	274.3	199.8
88	155.6	228.5	348.3		161.9	262.5	263.9		174.9	282	192.2
89	159.1	231.6	344.1		161	266.2	260.2		175.9	279.6	196.8
90	157.5	232.8	345.9		161.1	266	260.8		174	278.3	194.6
91	158.1	229	354.8		159.4	270.4	263.7		174.2	283.3	200.4
92	157.4	229.1	348.6		160.8	271.2	259.5		174.7	274.7	187.8
93	155.1	232.1	343.1		159.5	270.2	254.2		175.1	284.2	197.5
94	155.2	229.8	335.9		159.5	264.3	253.2		175.4	282.3	199.4
95	157.7	234.6	351.9		158.9	266.2	252.9		173.9	281.2	196.1
96	156.4	230.8	339.7		160.6	266	252		174.4	282.5	194.8
97	157.2	237.8	347.8		160.1	270.4	251.8		175.4	281.8	193.9
98	156.1	236.6	360.4		161	259	251.3		174	284.1	194.2
99	157.2	236.1	347.8		159.5	262.5	246.5		178.2	291.8	200.8
100	155.5	233.9	356.4		158.5	261	251.4		176.6	280.8	197.4
101	156.3	235.3	354.7		160	266.5	251.4		175.4	284.6	196.2
102	154.9	235.8	355.1		158.9	263.8	249.3		177.2	287.2	197.7
103	156.6	227.8	363.1		160.1	260.5	253.5		174.6	292.3	190.7
104	156.8	228.1	366		158.5	259.7	247.2		175.1	282.6	200.7
105	157.4	229.2	378.7		158.5	258.9	252.1		176.3	285.5	200.4
106	156.9	234.3	366.6		160	261.2	249.6		175.3	286.3	195.9
107	159.8	230.4	368.6		156.5	253.1	251.3		175.6	287.7	198
108	157.6	230.6	369.1		157.9	260.4	252.9		176.8	291.6	196.2
109	156.3	232.3	367.8		156	256.1	248.7		176.4	284.9	196.1
110	155.6	227.3	371.9		158.7	255.6	249.6		175.8	295.8	196.3
111	157.2	235.5	380		159.9	251.3	254.4		173.8	289.4	193.2
112	157.2	229.6	373.1		158.8	257.6	243.9		173.8	284.9	201.9
113	156.5	229.2	371.1		159.9	248.4	245.3		173.1	284.9	191.1
114	158.2	230.6	369.3		157.9	253.4	239.7		174.7	282.8	200.1
115	156.3	233.3	374.5		158.1	258	244.5		175.4	287.3	196.2
116	157.6	232.3	378.8		160.8	252.1	242.9		172.9	286.9	191.9
117	156.6	228.1	385.4		159.2	250.7	244.8		174.9	285.9	193.2
118	156.5	229.6	381.2		157.7	249.7	236.7		172.9	281.4	196.8
119	155.5	230.6	375.8		158.8	247.6	241.4		175.8	281.6	194
120	155.6	223.6	376.8		158.8	248.6	232		173.7	290.2	196.3
121	156.1	235.4	372.8		157.1	249.4	233.6		175.2	284.8	198.6
122	155.4	224.8	375.8		160.1	249	235.8		175.9	293.8	193.1
123	155.8	233.1	379.2		157.9	244.1	235		172.9	311.8	203.3
124	155.6	227.7	382.9		159.9	249.9	227.9		176.3	292.3	198.5
125	154.5	231.7	380.2		159	244.4	230		174.4	298.2	191.2
126	155.7	222	378		156.8	252.8	228.1		174.9	286.8	190.4
127	155.3	235	374.4		159.3	246.4	226.8		175.3	298.4	204.2
128	155.7	223.7	374.6		158.9	247.9	226.2		175	287.2	193.8
129	157.7	229.5	378.8		158.8	241.5	221.6		174.5	307.4	205.4
130	155.3	228.5	381.8		159.9	250.1	223.6		176	286.9	190.4
131	154.2	225.4	373.6		160.9	245.8	224		173.5	287.7	198.7
132	152.5	223.2	381.8		159.3	248.7	216.6		177.1	276.9	197.5
133	154.5	231.6	365.8		161	245.2	225		174.6	293.3	197.2
134	154.9	231.4	379.1		160.1	251.1	219		177.7	289.1	202.9
135	154.7	227.9	370.8		162	242.1	221.5		176.3	295.3	198.3
136	155.6	226.4	372.1		158.5	249.3	219.5		177.1	289.1	199.2
137	155.9	232.4	377.3		160.1	247.3	222.9		177.5	299	198.1
138	154.3	229.2	371.2		157.6	243.2	223.8		178.9	286.6	195.4
139	156.6	232.5	368.6		160	254.8	226.1		177.4	280.2	201.8
140	154.1	235.2	370.9		158.6	241.5	232.2		178.1	295.3	197.1
141	154.7	231	369.2		158.7	246.6	223.6		179.5	283.8	199.7
142	156.6	227.7	373.6		159.6	243.4	230.1		179.2	296.2	200.4
143	151.2	225.7	374.4		160.4	242.1	230.8		177.7	292.8	196.7
144	154.9	234.1	365.2		159.9	244.8	231		179.6	291.2	204.2
145	154.2	234.1	368.9		158.1	254.8	236.5		178.6	277.8	198.2
146	152.8	231.4	370.4		157.9	247.5	231.9		178	288.2	200.1
147	152.9	227.2	366.8		158	242.4	236.1		179.8	292.4	214.2
148	153.4	233.6	365.9		159	241.9	235.5		178.8	286.2	203.4
149	154.8	232	365.6		160.7	243.9	234.9		178.9	287	202.8
150	154	231.3	371.1		158.3	244.7	237.2		180.9	282.7	202
151	155.9	233.6	364.7		158.4	238.4	231.8		175.9	291.9	215.2
152	155.9	234.5	369.9		157.5	243.9	232.8		181.5	280.6	203.7
153	155.4	233.9	368.1		158.6	240.6	230.4		178.2	285.4	208.4
154	156.9	231.1	361.6		158.7	241.6	231.4		178.2	284.7	197.8
155	156.2	233.5	358.9		157.6	240.2	229		176.2	283.8	209.4
156	154.6	231	368.4		157.8	246.1	231		177.9	286.3	197.5
157	157.4	234.6	368.8		160.6	252.1	229.5		180.8	275	207.1
158	155.7	242.4	368.8		158.4	248.4	229.6		179.5	285.2	210.9
159	156.4	241.8	340.9		159.2	258	226.9		181.1	287.7	206.6
160	156.9	239	350.4		160.1	253.8	228.8		179.2	284.7	196.9
161	155.4	234.9	372.1		158.5	258.5	231.2		179.9	276	198.7
162	159.2	239.4	355.3		158.6	253.9	229.8		178.9	285.9	214.2
163	155.7	238	353.4		158.2	255.1	232.9		180.3	280.6	208.7
164	156	237.8	352.2		158	255.9	225.2		177.9	278.2	203.2
165	158.2	231.2	356.1		158	255.5	229.7		178.6	291.9	208.5
166	160	239.9	354.9		156.8	254.2	225.2		179.2	279.4	206.3
167	159.2	237.1	362.6		158.7	248.4	223.2		178.4	278.8	200.5
168	159.1	237.2	364.1		157.2	254.3	232.2		179.2	275.4	203.2
169	159	238.5	369.7		157.2	254	221.8		180.4	276.9	206.4
170	158.7	232.8	357.6		158.6	250.1	226.6		178.6	292.2	208.7
171	160.9	239.6	370.4		157.9	256.1	220.4		179.9	280.5	202.7
172	160.6	238.4	367.8		157.3	252.9	222.7		180.3	290.2	203.1
173	161.5	236.4	368.7		157.5	249.8	224.7		180.2	278.8	200.1
174	163.5	239.8	376.9		158.2	253.3	222.2		179.1	284.8	195.1
175	164.4	230.9	366.3		157.6	256	221.6		180.7	277	202.4
176	166.4	239.8	378.8		157	249.9	220		183.3	277.9	204.3
177	168	252.5	370.1		157	259.4	221.7		182.9	280.4	205.4
178	170.6	257.3	367.4		156.6	261.1	219.9		185.6	271.5	202.6
179	168.8	251.9	364.1		155.3	263.1	216.6		195.2	274.6	202.5
180	169.2	257.4	375.1		157.5	249.2	218.2		197.8	287.6	216.5
181	167.8	257.1	368		157.9	258.7	222.4		203.1	281.6	205.3
182	170.3	251.2	368.6		156	258.7	221.1		200.3	288.8	200.1
183	167.3	257.1	376.1		156.8	259.5	217.4		198.8	274.8	193.8
184	169.1	260	378.4		157.3	253.6	221.6		198.8	287.5	200
185	173	258.8	386.5		157.2	259.9	220.6		196.7	280.9	207.8
186	171.2	264.1	383.4		156	260.5	224.5		196.3	277.1	202.2
187	173.4	260.4	373.4		158.5	254.1	220.1		196.5	280.5	203.8
188	173.2	259.3	373.9		158.3	262.2	218		191.7	279.1	204
189	173.3	265.5	372.6		157.5	259.5	219.9		190.6	278.3	210.7
190	171.4	264.9	351.1		157.1	255	217.2		189.4	274.5	201.8
191	174.9	258.4	348.1		159.4	256.2	217.9		188.5	275.2	209.6
192	174.4	256.1	370.2		156.1	264.2	219.5		187.1	265.4	194.7
193	171	253.6	343.4		157.3	253.7	217.6		185.6	272.3	199.7
194	172.4	256.8	352.5		156.5	259.4	214.7		186.2	280	204.9
195	170.9	255.4	353.1		158.9	259.4	215.3		183.5	270.7	201.3
196	170.7	263.9	354.8		156.2	266.8	213.2		182.7	273.6	198.7
197	171.7	256.2	353.2		158.4	267.8	216.3		182.7	267.2	199.9
198	169.7	255.1	350.8		158	264.2	213.7		180.3	265.8	204.8
199	171.8	261.7	350.5		156.8	260.2	205.1		180.2	264.8	205.4
200	169.2	252.1	353.6		158.4	262.7	210.9		180.2	275.3	203.7
201	173.7	252.6	358.6		155.8	267	210.1		179.9	272.4	202.1
202	171.7	261.8	346.1		157.5	269.5	208.5		180.2	270.9	201.6
203	169.5	260	346.6		158.6	258.6	206.8		178.3	270.8	199.2
204	171.8	254.5	346.8		156.2	258.9	207.2		178.5	260.1	201.6
205	172.6	255.8	339.8		157.1	258.1	204.2		178.5	268.1	204
206	173.2	247.2	344.4		158.6	259.3	204.5		177.7	270.7	206.3
207	171.9	250.7	345		158.1	255.6	206.2		173.8	264.2	204.9
208	173.6	256.7	346.3		155.4	258.4	203.6		176.5	267.6	204.5
209	173	252.1	350.8		157.4	255.1	205.3		173.2	265.2	196.8
210	169.2	249.3	341.2		156.8	258.1	208.9		176.2	265.2	202.5
211	169.8	247.3	340.4		156.7	256.1	207.8		173.6	273.1	198.3
212	169.2	254.2	340.5		157.3	254	203.1		172.7	266.9	202.8
213	167.5	245.9	342.6		159.2	251.2	208.2		174	267	203.8
214	168.4	252.2	338		157.4	253.6	208.2		174.4	269.5	203.8
215	166.6	247.9	350.2		156.6	254.2	205.6		172.9	254.8	191.4
216	166.4	248.1	332.2		157.4	254.2	208		171.5	269.1	195.4
217	168.3	241.9	340.3		158.5	248.6	209.2		173.5	265.3	202.4
218	166.3	243	337		158.3	245.7	211.8		172.6	261.8	205.4
219	164.4	242.2	337.9		159.9	251.4	210		171.9	267.2	200.6
220	162.5	244.7	341		160.2	241.4	208.1		169.7	265.4	202.8
221	161.6	238.8	340.6		156.2	246.9	203.2		170.7	264.8	195.9
222	166.5	252.7	338.2		157.7	246.4	210.6		170	263.5	194.8
223	164.8	247.2	333.9		159.6	251.6	210.6		171.4	262.2	201.2
224	163.5	244.4	342.4		160.2	250.1	212.7		170.5	268.8	202.7
225	162.6	243.7	349		158.1	250.6	208.5		170.8	263.2	205.3
226	164.9	243.3	340.9		158.1	244.1	206.2		170.1	260.2	203.8
227	161.7	242.4	352.6		157.3	253.6	211.6		168.2	249.9	192.7
228	163.7	247.1	358.1		159.6	248.9	213		169.4	261.6	200.7
229	162.8	245.2	352.4		160.5	252.8	212.9		170.2	251.9	191.8
230	162.8	239.2	340.1		156.4	256	212.8		170.6	267.5	206.5
231	162.2	243.2	327.4		160.3	249.2	213.8		169.2	265.8	208.4
232	167	242	347.8		160.5	252.4	216.9		168.9	250.4	197
233	165.1	240.9	344.1		158.8	255.4	219.8		167.8	249.8	194.6
234	160.9	250.4	334.8		160.2	253.8	220.4		168.7	259.3	201.1
235	163.2	251	334.3		162.8	246.7	223.4		167.9	249.6	200.8
236	161.8	242.9	329.2		158.9	248.9	225.2		168.9	256.7	193.9
237	164.1	247.5	332.1		159.2	252.9	227.3		168	267.3	204.5
238	161.3	241.4	331		161.1	252.7	229.5		167.5	259.6	195.8
239	163	250.3	340.8		160.4	254.1	229.4		169.1	266.2	199.2
240	161.1	245.4	333.6		161.2	258.6	237.7		168.7	272.4	209.9
241	161	243.5	331.6		159.8	253	237.9		168.4	267.9	206.3
242	161.3	244.5	341.2		159.3	251.8	237.1		169.2	271.8	201.2
243	162.9	242.2	340		162	253.2	246.9		168.9	252.8	198.2
244	163	239	333.9		160.9	257.5	243.5		172.4	276.8	211.5
245	158.5	261.2	334.6		161.2	254.8	245.2		175.4	258.8	207
246	160.4	260.9	342.2		158.4	250.9	243.4		178.9	266.8	207.9
247	160.7	242.9	347.8		159.5	256.6	242.5		178.7	258.8	193.8
248	160.3	236	356.1		161.4	251.4	245.1		182.9	262.4	200.8
249	159	257.4	329.1		159.1	254.4	245.4		187.1	280.4	208.9
250	160.6	257.9	325.5		160.2	252.8	247.5		188.1	273.4	208.2
251	157.8	258.3	328.1		159.7	253.9	245.1		184.7	270.6	215.4
252	158.2	256.3	324.2		159.9	251.6	245.2		184	258.2	199.8
253	159.6	254.1	327.4		161.6	245.1	247.7		184.3	273.6	215.2
254	160.2	248.2	325.2		159.7	251.2	248.5		181	265.8	214.8
255	161.2	247.8	330.8		161.4	247.6	250.7		181.1	258	198.2
256	156.3	249.2	334.5		159.2	245.4	249.8		183.3	256.4	201.6
257	159.9	253.8	327.1		159.5	249	250.9		179.2	253.4	201.2
258	161.9	252.2	343.2		158.2	254.8	255.5		181.3	270.7	206.4
259	160.2	249.4	333.6		160.5	256.5	247.5		180.2	257.2	196.9
260	160.2	251.3	342.9		158.8	250.8	248.3		181.5	263.8	202.5
261	161	244.9	339.9		160	260.5	251.8		182.5	263.8	210.6
262	160.3	241.1	351.4		162	252.1	247.4		180.1	263.8	209.4
263	160.9	240.4	350		159.6	249.6	247.7		178.5	258	194.6
264	159	249.6	348.8		158	256	247.6		178.3	254.8	195.8
265	158.5	242	329.9		159	259.5	251.4		177.2	269.1	210.2
266	158.6	240.4	336.3		159.6	257.4	244.8		174.6	268.8	214
267	161.4	242.2	341.2		159.4	259.4	243.7		176.1	264.4	208.9
268	160.5	243.2	327.3		159.8	255.4	245.4		176.5	262.2	210.2
269	162.6	241.4	335.8		160.1	263.6	243.1		174.9	265.1	209
270	158	239.4	344.1		159.3	261.7	241.4		174.2	253.9	190.7
271	159.4	242.4	348.6		159.1	260	242.5		172.8	267.2	202.1
272	158.4	235.2	345.2		158.8	264.1	233.5		173.6	266	207.2
273	160.5	244.4	341.5		159	265.9	240.6		174.8	253.5	197
274	159.2	234.4	342.5		159.7	269.5	235.2		172.6	272.2	196.1
275	159	243.2	336.1		161.3	262.5	239		172.9	266.8	205.3
276	160.9	240.7	351.1		159.6	261.4	236.7		170.5	263.6	196.7
277	160.4	244.4	348.1		160.6	270.7	236.3		172.9	268.3	206.7
278	160	238.2	347		158.8	257.6	237.8		171	276.6	202.4
279	160.1	240.9	333.3		159	261.4	237.3		171.2	259.5	203.8
280	159.2	239.4	328.2		159.8	262	231.6		169.6	252.6	193.3
281	159.9	248.2	327.1		160.8	257.9	233.6		168.7	265.8	205.6
282	159.8	240.3	335.9		158.4	259.5	235.2		168.6	274.1	199.4
283	158.8	253	337.1		158.2	262.6	239		169.2	268.2	205.7
284	159.5	254.6	332.6		159.3	262.6	234.6		168.8	267.7	203.2
285	159	250.1	337.2		159.8	255.1	230		170.2	263	199.3
286	156.4	249.9	342.2		159.7	257.1	237.5		170	265	203
287	160.1	250.1	340.1		158.4	263.2	233.6		168.3	270.7	200.4
288	159.4	252	344.1		158.6	252.4	236		171.1	260.6	200.9
289	158.6	248.3	340		158.9	255.9	235.6		167.8	264.2	199.8
290	159.2	251.2	323.5		159.9	258	232.7		169	272.9	199.6
291	160.7	253.3	325.3		160	252.2	231.2		168.4	263.8	199
292	159.2	248.2	335.9		159.7	255.7	234.9		168.4	271.7	196.1
293	160.6	250.5	327.9		159.1	256.6	232.1		167.8	270	203.3
294	159.1	245.1	329.8		159.5	259.6	233.1		167.2	261.8	196.4
295	160.7	245.5	335.3		157.5	259.4	231.1		167.5	261.1	200.6
296	160	248	341.4		157.6	256.5	231.1		166.6	269.8	197.7
297	159.1	250.6	340.9		159.2	253.6	231.8		169	266.5	199.8
298	160.4	243	342		158.9	249.4	227.1		166.5	266.5	204.6
299	161.8	240.9	345.4		160.5	253.9	227.4		166.8	263.5	203.7
300	159.5	245.4	344.3		160	248.2	221.2		166.4	265.3	197.9
301	159.9	245.2	344.1		155.9	253.1	228.1		166.3	277.2	205.9
302	163.3	245.3	338.4		157.9	252.6	223		166.2	266.8	201.6
303	159.9	244.1	346.9		158.7	251.9	225.7		167.6	263.8	205.2
304	160.4	242.3	348.5		156.1	249.7	225.6		165.2	267.3	202.8
305	159.3	241.1	335.1		158	252.9	226.7		167.1	255.9	202.5
306	155.8	240.8	334.1		157.9	250.6	224.4		164.5	267.4	201.9
307	162.9	244.8	338.4		160.4	253.9	219.2		166.7	262.7	202.4
308	160.5	247.2	343.1		158.3	248.4	221.9		166.6	271.4	206.5
309	160.7	237.7	344.6		159.4	255.4	221.6		166.1	277.7	204
310	161.2	232.5	339.2		157.4	246.2	215.9		167.3	269.1	200.8
311	155.2	240.6	340.5		158.7	256	223.6		165.9	275	208.4
312	159.9	242.7	352		157.5	259.4	219.3		168.2	273.2	197.8
313	160.9	243.9	350.9		157	257.5	216.7		165.4	267.7	201.3
314	160.2	240.3	357		157.1	252.8	215.3		167.6	264.8	198.2
315	159.5	236.1	348.1		157.6	265.4	216.5		166.9	272.2	203.6
316	160.4	231.6	351.1		158.4	264	214.6		166.9	267.2	205.1
317	157.3	254.9	344.1		158.2	265	219.2		166.6	268.2	207.7
318	158	252.2	339.3		157.7	264	213.2		169.1	264	204.9
319	158	249.1	352		157.6	265.6	218		167.7	263.9	212.1
320	157.8	244.2	349.1		156.8	264.1	214.4		168.9	272.2	208.9
321	160.9	248.2	344.4		159.4	265.3	215.1		169.9	273.2	205
322	159.4	245.2	357.4		158.3	264.5	213.4		167.4	265.2	205.6
323	157.5	247.2	349.9		156.4	264.9	218.6		167.3	268.8	205.1
324	158.3	239.4	352.4		156.4	267.9	219.9		166.7	278.7	219.2
325	158.2	245.4	357.2		157.3	262.2	216.8		168.2	273.4	209.4
326	158.1	244.4	351		159.9	269.5	220.7		169.5	266.5	211.3
327	160.1	242.8	348.5		158.7	265.4	217.4		169	282.4	216.2
328	158.7	245.9	343.4		156.3	265	218.5		168.8	272	211.9
329	158.4	239.1	338.3		158.1	265.5	219.9		167	264.3	206.4
330	158.8	235.5	342.6		156.8	257.9	219.9		168.3	269.4	213.3
331	157.1	238.3	344.2		159.8	261.5	221.7		169.9	268.2	208.6
332	157.8	235.8	346		159.8	262.4	222.3		168.5	270.1	215.3
333	158.8	235.6	328.9		159.5	258.5	219		169.6	270.5	212.7
334	159	237.1	336.9		157.8	260	222.4		169.1	268	208.7
335	159.1	231.9	344.3		159.3	263.1	225.3		168.6	262.7	210.1
336	158.8	236.3	344.9		158.3	262.3	228.1		167.4	268.5	209.5
337	160.6	230.4	336.3		157.1	260.5	229.6		169.2	259.6	213.2
338	159.6	233.6	326.2		155.4	256.6	230.2		167.7	264.8	215.2
339	160.9	244.2	322.5		157.4	254.8	239.2		168	266.9	201.2
340	159	230.9	329.4		157.5	261.3	233.1		166.8	275	206.9
341	159.9	236.5	328.2		155.6	265.6	235.4		170	278.2	207.2
342	160.8	233.5	326.8		155.2	255	235.9		168.5	265.2	200.9
343	158.7	224.8	328.8		157.7	257	239.1		168.1	267.3	206.6
344	160.1	231.4	323.4		154.8	257	237.3		167	267.2	204.2
345	158.9	243	318.2		156.1	250.4	235.3		167.6	269.2	206
346	157.1	243.9	306.9		155.9	253.4	235.5		166	264.6	206.8
347	159.1	241.2	319		157.8	250.9	235.6		167.4	269.3	208
348	159.8	243.1	307.2		156.6	251.2	232.8		169.5	270.9	208.2
349	158.3	237.9	313.9		155.4	250.8	237.3		168.3	259.8	205.2
350	158.7	240.7	316.2		157	246.6	232.2		166.6	272.2	203.8
351	160.4	246.5	307.8		159.2	251.1	236.1		166.5	262.2	197.9
352	160.6	241.6	311.7		159.3	250.2	234.4		166.8	257	197.8
353	158.2	248.4	318.3		156.3	254.9	231.9		166.7	271.9	200.7
354	162.3	246	316.7		156.6	254.5	232		167	270.1	192.2
355	160.7	237	315.1		157.5	252.5	234.6		165.3	264.4	207.1
356	164	241.4	310.2		155.2	253.6	233.9		164.4	274.8	205.8
357	160.6	243.6	303.4		155.7	251.4	231.1		164	267.6	196.2
358	159.8	240.7	311.4		156.7	254.1	235.1		169.1	268	198.2
359	157.3	235.6	313		158.6	248.9	233.7		166.8	268.2	198.6
360	159.5	241.8	317.1		155.1	248.2	236.4		168.7	263.2	198.1
361	158.9	233.8	306.4		157.2	247	237.8		170.2	273.2	200.8
362	158	239.9	317.4		158.9	258.5	238.3		168.2	266.7	201.2
363	157.4	237.2	316.4		157.4	251.3	235.5		167	260	197
364	157.1	236.3	320.6		156.6	247.8	235.4		166.8	266.2	192.2
365	160	236.6	323.4		159.8	250.6	237.8		167.8	265.3	195.7
366	159.2	241.4	319.4		155.5	247.1	236.3		166	265.5	200.6
367	158.2	236.4	324.5		158.1	247.4	237.2		167.3	262.9	198.5
368	159.5	233.1	332.3		158.1	248.1	237.5		166.7	261.4	193.8
369	160.3	232.1	330.6		156.5	241.8	236.9		166.9	260.5	200.9
370	162.2	235.1	325.4		155	245.9	237.3		167.6	264.3	201.9
371	157.8	244.2	337.4		155.6	242.6	240.7		166.3	265.1	192.8
372	159.1	247	333.6		156.3	241.4	240.5		168.4	262.2	202.4
373	158.8	251.2	338.4		158.6	242.5	238.6		167	267.8	195.3
374	160.8	244.3	333.8		156.8	243.4	237.9		168.8	266.5	196.8
375	161	257.9	337.2		155.5	246.7	233.9		168.3	271.2	202.5
376	159.6	254.2	336.6		157.1	241.9	238.3		167	265	201.2
377	160.8	251.9	343.3		158.1	237.7	239.5		167.9	264.5	203.2
378	158.8	248	347.9		156.6	241.4	236.9		168.3	265.2	203.1
379	159.4	250.3	341.4		153.3	243.8	237.9		168.6	267.2	203.5
380	161.4	250.7	352		156.2	239.6	238.5		168.5	270.7	198.8
381	160.2	255.9	336.7		158.3	244.4	241.4		167.4	256.4	204.7
382	161.4	252.8	348.7		156.1	249.3	238.1		168.1	257.8	205.5
383	159.7	252.8	340.7		157.2	248.2	240.6		170.4	260.3	211.2
384	158.7	250.3	347.8		156.3	242.1	237.6		168.3	262.3	207.5
385	160.1	255.8	351.3		157.5	239.6	235.7		166.5	257.2	203.9
386	164	254.4	353.6		157.5	242.1	233		167.8	260.2	199.2
387	162.3	252.8	340.9		158.6	241.2	237.2		168.7	259.8	203.5
388	162.9	252.2	356.6		156.5	248.1	231.4		166.6	257.8	207.3
389	160.9	254.8	356.8		157.2	246.6	235.8		166.7	260.9	204.1
390	163.3	256.9	357.6		158	245	232.8		167.3	259.8	210.2
391	161.9	246.6	357.3		158.8	239.9	230.6		167.3	266.2	210.6
392	161.5	246.6	369.3		156.7	239.5	231		168.8	267.8	202.8
393	163.9	255.8	360.7		156.7	243.6	232		168.5	263.2	202.9
394	163.6	255.8	354.2		158.9	246.6	231.9		168.1	274.5	201.7
395	162.8	254.7	357		155.1	241.5	228.1		168.9	261.7	201.3
396	164.7	254.1	351.9		158.9	243.5	229.5		167.6	261.6	202.8
397	164.4	253.1	350.2		158.8	239.8	228.1		169.2	267.1	202.8
398	162.7	249.5	354.1		156	243.8	223.4		168	274.6	200.8
399	164.3	243.6	364.9		157.2	238.4	227.5		166.1	268.1	203.7
400	163.1	247.8	369.7		156.7	244.7	229.9		166.9	269.7	198.1
401	163.8	244.1	365.5		157.7	239.4	229.3		169	272.5	196.2
402	166.7	243.6	359.6		161.1	241.2	230.3		166.7	261.3	203.3
403	165.7	243.6	368.6		157.6	245	231.8		169.8	267.9	201.7
404	164.9	246.2	357.4		156	244.8	227.3		167.3	264.5	195.6
405	167.2	252.9	362.2		156.2	245.1	225.2		168.9	268.1	204.7
406	164.9	245.2	358.6		156.8	246.9	227.1		169.8	268.7	202.6
407	165.3	250.6	352.4		158.6	243.3	232.8		167.2	278.9	210.9
408	165.1	242.7	350.6		157	241.2	226.9		168.9	260	194.7
409	164.6	241.6	357.9		157.1	246.4	226.8		167.4	264.2	200.7
410	163.5	263.4	350.4		155.4	245.1	228.3		163.2	263	199.2
411	162.9	269	356.2		158.1	244.8	229.7		166.6	267.5	200.7
412	164.1	242	346.1		159.6	247.3	227.1		167.5	263.2	204.2
413	163.9	237.9	352.8		157.3	247.9	227.4		169.2	275.8	210.1
414	162.9	259.9	359.4		157.3	250	224.8		167.2	274.3	195.3
415	164.4	260.6	346.4		158.3	244.9	229		166.7	257.9	190.9
416	160.6	254.2	350.2		155	248.9	227.1		169	270.1	212.2
417	161.3	254.9	340.5		155.9	252.1	232.1		169.3	271.8	213.2
418	161.6	252.8	341.8		158.1	254.1	228.1		169.1	259.7	199.3
419	161.6	264.2	348.8		158.5	257	232.1		166.6	275.3	211.3
420	160.6	261.4	336.1		158.9	249.7	233.4		168.1	276.3	203.4
421	160.7	258.9	339.4		160.1	257.4	232.6		168.8	265.3	203.8
422	161.6	258	326.4		158.4	253.9	237.4		168.7	271.4	207.8
423	161.6	257	336.5		158.6	254	240.5		170.9	268.2	204.1
424	160.7	254.9	337.1		160	247.5	243.8		167.6	257.3	197.8
425	164.2	259.3	331.5		159.1	258.1	239.4		169.6	263.4	198.5
426	161.7	263.1	338.6		158.8	251.8	240.9		169.6	267.2	202.4
427	162.5	256.2	336		158.4	247.8	240		170	264.9	194.9
428	159.8	255.7	336.6		157.8	252.2	239.9		170.7	275.2	204.7
429	160.2	256.9	339.4		158.6	249.1	242.9		168.3	262.2	200
430	160.9	256.8	329.6		156.2	248.3	238		168.7	265.3	195.5
431	160.5	251	339.7		158.4	248.9	242.1		167.5	256.6	196.9
432	161.3	254.9	334.3		158.7	252.9	242.9		170.3	271.4	197.2
433	158.1	260.5	332.2		157.8	249.1	241.4		168.1	277.1	205
434	159.1	250.5	321		157.2	251.1	240.9		169	269.2	195.4
435	162.2	250.5	337.6		157.8	247.1	239.3		170.6	262.9	203
436	158.6	253.3	352.2		156	245.9	236.7		168.4	261.9	198.2
437	157.3	250.1	346.4		157.7	245.1	242.6		169	260.6	194.2
438	158.1	248.1	340.5		158.1	248.9	242.1		169.5	264.7	197.4
439	158.4	256.2	346.1		156.4	241.6	245.9		169.8	261.2	194.6
440	157	250.5	342.8		157.8	240.2	243.3		169.1	268.6	196.6
441	159.5	244.8	341.7		156.7	241.4	240.8		169.4	278.4	199.8
442	157	247.4	337		157.5	243.1	244.9		167.3	270.6	200.8
443	157.6	250.6	341.4		156.9	240.2	244		169.5	270.6	195.4
444	156.4	256.3	344.1		156.9	239.4	243.8		167.2	268.1	194.4
445	157.5	262.2	341.4		156.2	242.6	244		169.6	271.4	193.7
446	157.7	249.2	348.8		157.3	242.5	247.3		168.8	269.5	202.4
447	158.6	254.4	339.5		156.6	248.8	242.9		169	274.4	203.4
448	158.6	253.6	340.3		156.5	238.1	247.6		168.1	267	198.6
449	156.7	251.9	352.6		156.1	237.1	245.9		168.2	262.6	193.2
450	157.9	249.8	350.3		156.3	236.9	248.3		169.3	272.1	200.6
451	156.3	249.5	346.4		156	238.5	245.7		168.7	269.7	192.5
452	155.9	251.8	349		155	244	241.6		171.3	270	200
453	159.2	252.1	341.4		158.2	237.9	248.4		166.7	278.4	207
454	159	254.9	352.9		157.3	235.9	247.2		167.6	252.8	186.8
455	157.4	243.7	349.1		154.5	239.3	243		170.3	263.2	197.2
456	154.9	245.6	350.4		157.4	236.5	241.4		166.4	264.6	195.8
457	158	249.9	350.9		155.7	239.9	244.6		170.7	258.5	203.8
458	158.2	248.8	350.1		156.5	235.9	241.1		168.8	260.5	187.1
459	157.5	247.6	333.8		155.4	238.9	243.6		167.4	257.2	192.9
460	158.9	256	343		155.8	237.9	237.2		166	254.7	196
461	158.5	252.5	337.1		156.9	237.4	238		167.8	260.7	189.8
462	156.1	248.9	342.7		155.5	235.2	237.1		170	255.3	195.7
463	158.4	252.9	344.2		156.6	238.4	239.1		167.7	259.4	192.8
464	157.7	252.8	347.1		154.5	233	236.5		165.5	260.6	194.8
465	156.6	247.3	353.7		154.9	236.6	234.5		168.3	243.5	192.4
466	157.1	239.9	337.7		156.3	235.1	231.4		166.9	254.8	193.9
467	156.7	252.1	351.2		156	232.4	236.4		169.9	265.6	202
468	156.8	245.2	350.4		154.6	235.2	227.6		169.1	265.8	201.3
469	155	248.4	346.6		153.6	232.9	230.3		169	265.2	200.2
470	157.5	242.9	352.2		156.1	240.4	230.4		169.2	270.5	202.2
471	155.8	242.8	346.1		156.4	227.4	226.4		166.9	270	200.9
472	159.5	241.9	349		154.3	232.5	223		168.9	262	200.2
473	158.6	241.9	354.6		157.1	235.9	220.3		169	265.1	198.2
474	159	241.7	358.4		155.9	230.5	219.5		168.2	275.6	196.6
475	159.5	242.8	357.9		155.6	231.7	222		167.2	266.2	196.8
476	160	238.5	357.9		155.5	225.8	216.9		167.3	271.1	192.9
477	158.6	236.2	358.8		155.5	236.2	219.3		168.4	267.7	196.5
478	155.9	240.3	350.8		156.8	232.9	212.9		166.7	258.2	189.2
479	159.3	238.4	361.7		154.2	231.4	216.1		170.2	268.7	198.3
480	157.3	243.2	355.9		155.4	227.1	213.9		170	270.2	204.8
481	158.7	229.9	351.8		155.7	233.1	210.9		168.3	276.7	197.9
482	160.4	239.6	362.6		155.2	233.4	213.3		165.8	271.8	194.2
483	159.5	242	348.2		152.2	238.1	211.6		169.2	268.2	201
484	159.4	234.1	353.2		154.7	228.1	209.6		168.8	279.3	197.4
485	158.3	236.4	343.6		156.8	232.6	208.6		169.2	271.8	195.5
486	160.9	240.9	356.9		159.2	233.7	208.6		168.8	268.8	197.8
487	159.9	243.4	353.1		153.5	225.8	207.7		167	264.7	199.1
488	157.9	237.6	354.2		154.1	229.6	207.7		167.9	273.7	200.1
489	159.1	247	350.6		153.9	231.5	206.6		167.3	272.8	189.2
490	158.8	236.5	355.1		154.1	232.2	207.1		167.1	278.6	199.9
491	157.7	246.8	351.2		154.9	233.4	205.6		168.4	268.5	199.8
492	156.8	259.1	358.2		155.5	231.4	206.6		168.9	269.5	195.7
493	156.1	265.7	356.1		155.7	231.8	205.6		166	268.2	203.5
494	160	240.3	352		155.1	232.5	203.7		168.9	269.8	203.8
495	159.8	255.3	358.8		156.3	235.6	207.4		168.3	280.3	198
496	158.1	258.9	372.3		155.5	232.1	210.4		167.9	277.5	196.2
497	158.5	254.7	361		157.3	236.6	207.5		167.6	272	199.8
498	157.3	260.2	362.5		157.8	241.1	210.6		166.7	275	195.8
499	158.2	263.2	351		154.7	233.6	209.8		168.8	266.4	197.8
500	158.5	263.8	343.6		154.6	237.1	209.6		166.2	280.1	196.8
501	157.8	262.2	342.1		156.1	237	211.6		168.4	270.2	197.2
502	159.6	259.1	348.6		156.8	231.8	210.8		168.6	277.1	200.8
503	156.8	260.2	353		156.5	234.4	209.1		165.5	267.8	202.1
504	158.8	266.4	352.6		153.5	240.1	207.4		167	269.8	201.2
505	156	259.2	353.1		155.2	236.2	208.6		165.7	283.9	194.1
506	157.3	264.8	358		155.7	232.9	208.7		166	272.2	195
507	159.6	262.3	355.9		155.8	239.9	208		167.3	277	194
508	161.4	260.4	359.4		153.9	231.1	209.7		167.6	272.8	195.6
509	162	264.7	356.9		153.4	235.6	206.9		168.3	268.6	194
510	159.2	266.7	351.6		154.8	233	208.8		167.7	273.1	205.2
511	161.3	262.9	354.5		154.8	235.2	211.2		168.2	274.8	196.5
512	159.2	258.9	354.6		156	233.2	205		166.7	266	199.2
513	159.9	261.9	350.1		156.2	232.9	211.9		166.2	272.8	202.4
514	159.2	255.6	358.7		157	240.8	213.6		168.5	271.2	197.8
515	159	256.1	361.4		155	236.7	210.2		167.6	265.8	195.6
516	159	258.1	361.8		155.5	235.9	206.3		164.3	261.6	200.1
517	158.8	260.4	352.8		155.4	231.6	206.8		166.4	261.5	191.9
518	159.7	262.7	368		156	236.2	206.4		166.1	267	198.9
519	161.3	248.6	356.9		156.7	237.8	211.4		168	267.8	197.9
520	157.7	256.8	350.2		154.4	236.9	210.3		168.3	266.4	198.9
521	158.3	252.8	346.5		156.2	230.1	214.4		167.5	265.3	199
522	158.7	251.2	353.6		155.5	230.4	209.9		167.8	265.8	193.8
523	158.8	249.4	353.6		158.4	240.9	207.6		164.6	262.5	200.8
524	158.5	253.2	350.4		158.4	235.3	210.9		169.6	262.6	203.8
525	160.1	262.2	349.8		156	236.4	210.1		166.7	267.2	193.8
526	158.4	251.9	352.9		157.2	240.3	207.2		168.1	273.3	192.6
527	159	257.4	340.7		156.4	236.6	207.4		167.2	271.3	193.5
528	159	251.2	354.7		157.6	235.4	204.1		167.1	266.7	204.8
529	159.1	258.1	351.4		156.1	230.3	204		166.9	269.4	194.1
530	161.4	256.5	349.2		154.7	236.4	203.1		166.2	263	189.2
531	160.4	258.2	343.2		157.1	229.3	200.6		165.2	268.6	190.4
532	157.4	260.9	341.4		155.7	238.3	208.6		167	264.9	194.2
533	158.4	253.2	342.3		159.2	233.4	204.4		167.5	263.8	192.8
534	159	258.7	343.3		154.8	225.6	202.6		166.3	264.8	195.8
535	159.6	256	355.3		154.8	231.4	199.5		166.4	260.3	196.9
536	159.3	260.6	345.6		156.6	230.3	200.8		166.3	261.5	190.8
537	156.7	252.1	347.4		156.2	231.8	204		166.2	265.8	192.2
538	157.6	253	357.6		155.1	233.6	202.7		167.7	260.7	197.6
539	158.8	253.1	346.1		155.8	237.9	202		167.5	257.6	195.4
540	161.7	251.7	345.1		156.3	230.6	201.5		166.4	268.5	194.9
541	158.3	248.7	347.6		157.2	234.8	199.2		163.8	261.6	191.4
542	157.6	251.2	348.1		157.3	230.9	203.2		167.4	265.8	196.9
543	160	248.8	344		157	235.1	204.5		165.4	264.1	194
544	159	248.4	344.9		156	234.7	208.6		163.5	263	195.7
545	159.4	249.1	343.2		156.1	236.9	206.5		167	264.2	197.7
546	159.2	247.5	342.8		156.1	234.8	207.9		168.7	256.9	202.8
547	157.9	248.1	331.1		157.8	232.7	210.2		167.7	268.2	192.6
548	159.1	245.3	331.9		156.9	231.6	211		166.4	262.2	198.8
549	157.9	252.8	337.9		156.3	231.3	209.6		166.5	261.5	197.5
550	158.3	251.1	339.4		159.7	233.8	206.2		167.3	267	197.7
551	158	250.6	338		158.7	237.7	213.5		167.1	268.8	200.6
552	159.6	249.8	333.9		157.7	232.6	208.9		166.1	266.8	199.2
553	157.4	248.5	325.9		156.1	237.7	208.7		166.7	262.3	195.1
554	160.8	254.9	332.3		157.1	231.6	211.5		167.9	265	191.2
555	159.6	253.8	330.4		156.7	237.1	211		167	261.2	200.8
556	159.4	247.9	324.4		155.9	230.9	210		169	266.8	196.3
557	158.9	243.6	328.4		157.3	240	210.6		167.2	268.4	194.2
558	160.4	254.8	329.1		158.2	241.8	215.6		167.5	270	205.5
559	160.2	253.4	324		159	239.2	213.6		167.8	273.6	202.6
560	162	254.1	310.5		156.4	241.5	217.1		168.2	268.1	206.1
561	158.9	251.4	314.3		157.6	240.6	213.4		168	272.5	197.6
562	159.9	243.6	313.7		154.5	239.4	216.2		169.5	272.9	195.4
563	161.2	252.4	321.8		157.5	243.4	217.1		171.4	273	200.6
564	159.1	249.5	315.4		157.8	241.9	216		172.4	274.4	199
565	160.2	254.6	321.4		153.6	241.1	215.4		166.9	275.8	200.4
566	161	244.9	310.6		158	245.6	216.2		170.5	271.5	195.1
567	161.1	253.4	320.8		156.2	238.6	217.5		167.9	283.6	202.7
568	159.3	254.6	312.9		158.2	236.3	225		169.3	288.1	205.6
569	161.5	246.8	318.1		156.7	244.4	223.3		168.6	273.8	192.2
570	160.5	253.8	313.2		156.9	246.4	218.4		168.6	282.4	198.5
571	161.5	248.2	315.3		157.2	245.2	219.2		168.6	275.7	206.6
572	162.5	244.3	327.3		156.6	240.3	219.4		166.5	282.8	205.2
573	159.2	249.9	305.1		157.1	243.1	217		167	275.2	200.8
574	161.9	248.5	303.4		156.8	233.6	222.9		166.2	272	199.7
575	160.4	254.1	315.6		157.2	242.2	222.9		166.4	282.6	196.2
576	161.6	250.1	311.4		157.1	236.3	224.4		165.4	269.8	198.8
577	160.5	254	309.6		157.2	236.9	222.1		163.9	276.8	197.7
578	164	255.6	314		155.7	241.9	220		166.9	277.2	197.9
579	163.3	253.8	314		157.6	239.6	221.4		166.4	277.3	196.4
580	164.1	246.7	312.2		157.7	241.1	224		164	285.9	204.8
581	162.6	252.2	312.4		157.1	243.9	222		164.6	275.5	202.9
582	160.9	246	316.1		157.1	247.4	218.1		165.8	274.4	199.8
583	160.8	249.5	308.6		158.4	249.1	223.6		166.2	276	201
584	157.8	249.4	319.2		156.6	245.1	220.6		166.3	274.8	192.9
585	161.2	250.6	329.4		155.4	244.9	219.5		166.3	276.7	196.3
586	161.8	251.7	317.2		156.9	237.4	215.8		167	276	199.7
587	160.8	243.9	320.4		156.8	241.2	217.6		165.4	272.7	200.7
588	161.1	247.4	319.8		157.1	247.2	219.2		164.9	283.7	203.5
589	159.4	242.6	311.4		155.7	249.4	214.7		164.9	281.8	202.2
590	159.7	243.2	318.9		156.6	243.6	215.8		163	273.5	206.5
591	159.2	265.9	320.8		155.6	245.1	214.7		164.7	267	191.7
592	159.6	247.2	312.6		157.9	241.4	210.2		165.9	274.2	196.3
593	158.2	274.7	310.6		155.6	245.8	215.6		164.4	267.5	199.9
594	157.5	265.3	313.3		156.5	246.6	217.1		165.9	270.7	201.8
595	158.3	261.9	308		157.8	242.4	211.1		166.8	280.2	198.2
596	158.5	266.7	310.3		156	239.9	213.1		167.2	287.5	202
597	156.4	264.9	306.5		156.8	236.9	211		165.2	279.5	216.1
598	158.8	266.2	305.8		157.4	239	216.3		164.8	279.3	211.9
599	157.8	263.9	304.2		157.3	233.8	213.1		168.7	280.7	208.3
600	156.6	267.9	310.6		156.4	238.5	210.9		166.3	290	208.8
601	156	263	307.8		155.5	243.9	213.1		164.5	281.4	209.6
602	156	267.6	303.9		157	238	211.4		164.9	285.6	206.9
603	158.4	266.6	309.3		156.5	240.9	211.6		162.3	286.4	201.8
604	156.8	267.9	302.8		156.5	237.6	210.4		167	300.8	213.4
605	157.4	259.4	312.1		156	243.6	213.8		164.6	282.9	205.1
606	155.6	260.2	303.6		158	244.9	207.9		165.8	290.2	207.8
607	157.2	265.5	306.7		157.5	243.4	207.2		165.8	290.2	202.6
608	158.8	260.4	315.3		158.3	243.1	207.5		164.8	276.2	197.7
609	155.2	268.1	313.8		157.1	240.4	214.1		165.5	287.3	207.8
610	156.8	265.2	316.9		158.1	242.2	212		164.5	281.8	196.9
611	158.5	266.8	324.8		156.9	245.1	211.9		164.7	286.8	208
612	158.4	257.9	320.3		159.5	246.5	213.4		162.9	285.7	197.8
613	156.9	264.8	319.2		157.5	235.6	214.4		165.5	284.9	204.6
614	154.6	260.9	324.5		159.2	247.5	212.8		166.9	287.8	200.2
615	156.3	258.4	333		158.1	245.9	212.5		164.3	284.8	201.9
616	155.8	260	315.6		155.6	239.3	211.1		163.8	282.5	196.4
617	157.6	257.2	322.8		157.9	241.4	211.4		165	284.8	201.7
618	155.7	261.4	328.1		157.6	242.9	215.7		163.4	292.7	200.6
619	156.2	262.8	320.8		156.9	247.9	210.1		167.4	286.9	194.2
620	158.2	256.4	335		159.2	241	210.8		165.3	294.9	190.6
621	158.9	262.2	339.1		157.3	240.8	212		166	285.1	195.7
622	156.7	259.6	334.8		158	243	209.4		167.6	285.5	201.3
623	156.8	258.6	340.2		155.3	238.6	209		164.8	292.8	200.6
624	154.6	260.5	332.3		156.6	242.1	209.7		163.9	281.5	191.4
625	156.8	257.5	332.4		156.1	234.5	206.5		164.5	293.7	194.5
626	157.7	260.9	336.4		159.7	244	212.5		166.6	286.3	196.8
627	157.2	260.4	341.4		156.2	236.1	208.7		163.3	284.8	195.2
628	157.7	262.1	328.8		159	236.1	213.4		165.8	294.6	191.7
629	156.8	261.7	332		157	243.9	215.3		165.5	286.1	196.7
630	156.1	258.2	333.2		157.6	236.9	211.9		164.1	297.5	193.7
631	159.9	260.7	334.1		157	239.4	216.2		164	291.2	200.1
632	156.6	253.4	328.7		155	236.6	215.9		166.8	279.1	195.5
633	156.2	262.4	332.8		158.5	240.1	214.9		162.7	283.4	196.2
634	158.2	251.1	338.8		158.2	242.6	219.6		166.3	281.6	197.3
635	158.2	251.8	331.8		155.8	234.9	218.6		164.3	289.6	190.2
636	157.7	259.1	337.4		157.8	234.1	220.8		165.1	279.7	195.8
637	158.3	254.7	332.8		156.6	231.5	221.9		165.5	289.9	190.4
638	159.1	255.8	332.7		156	233.9	222.1		167.8	289.2	193.5
639	159.2	256.1	333.4		156.6	235.4	220.1		166.5	289.8	195.6
640	156.5	254.8	345.7		155	234.8	222.7		166.3	294.2	190.1
641	153.9	252.4	333.2		157.7	234.9	219.2		167	288.2	199
642	159.1	257.5	347.2		157	240.6	221.4		164.6	286.2	192.8
643	157.3	257.7	343.8		154.9	243.1	219.2		165.2	297.6	197.2
644	158.3	251.9	343.8		156.5	241.6	221.5		165	297.4	197.6
645	155.8	260.4	348.2		159.4	242.1	220.8		167.9	291.2	193.4
646	157.7	250.8	336.4		157.4	243.9	220.7		166.1	280	189.2
647	158.5	253.2	347.5		157.4	244.8	220.6		166	280.7	188.7
648	157.3	253.8	338.2		159.9	250.9	221.3		165.9	273.8	188.2
649	157.9	255.4	338.4		158.7	246.6	223.9		165.9	292.3	196.4
650	157.1	250.1	336.7		157.6	241.6	223.3		166.5	285.1	192.7
651	157.6	256.3	346.9		154.6	241.6	222		166	279.9	185.9
652	159.7	246.8	340.1		157.8	241.8	222.4		166.6	281.3	194.2
653	158	256.8	343.9		157	245.4	222.4		166	296.2	192.7
654	157.6	257	345.2		156.1	238.6	225.6		165	277.8	191.4
655	157.5	256.1	337.3		158.5	242.1	222.8		164.4	277.8	192.2
656	159.4	253.9	351.1		156.9	238.9	224.4		167.1	286.8	189.3
657	157.4	263.9	343.6		157.2	246.6	224.9		168.4	274.8	198.2
658	157.8	255.5	344.3		156.9	239.2	223.4		165.9	292	194.8
659	159.4	247.1	347.8		155.1	242.8	228.4		166	276.8	195.7
660	159.3	249.5	344.9		158.6	243.5	229.8		162.1	283.4	197.4
661	159.9	257	345.2		155.8	242.4	231.4		165	265.1	188.8
662	157.7	250.4	348.8		156.6	247	225.6		165.6	281.5	190.1
663	159.6	252.6	348.3		157.8	247.4	229.4		163.8	282.3	194.8
664	157.5	250.9	344.1		159.2	248.2	230.8		166.4	265.7	187.4
665	159	249.9	345.7		159.8	246.4	227.5		165.5	278.4	198.8
666	157.9	256.4	345.8		158.1	244.7	227.4		166	287.7	197.7
667	162.1	252.4	347.4		156.9	243.4	228.6		165.9	286.9	194.8
668	161	260.7	359.1		158	242.9	231.2		165.8	287.2	195.2
669	161.2	266.4	341.8		159.5	244.6	227.2		166	287.1	195.8
670	159.9	259.2	344.6		158.5	247.3	228.4		167.4	290.6	202.6
671	162	263.8	345.5		159.5	247.2	231.2		165.4	293.2	194.8
672	164.7	261.1	349.9		159.6	251.7	231		166.8	278.3	196.2
673	161.4	247.2	344.4		160.3	259.6	235.5		166.2	282.2	200.2
674	164.5	260.6	357.8		157.1	248.2	233		164.8	284.2	188.2
675	161.4	260.2	355.6		157.5	251.8	232.2		164	285.3	197.9
676	161.4	253.1	352.1		158.9	253	234.3		166.3	293.8	195.7
677	160.6	257.6	351.4		158	252.4	234.4		166.9	286.8	201.1
678	161.2	254.6	343.2		158.3	254.4	236.8		164.7	278.8	194.2
679	161.9	257.9	357.9		160.1	249.8	234.4		166.9	283.2	198.6
680	161	259.2	359.9		158.5	252.4	236.2		170.1	289.6	198
681	160	264.2	352.6		158	252.2	242.6		167	284	197.8
682	161.6	257.5	352.7		157.1	252.8	236.9		166.1	290.2	190.8
683	159.3	253.5	345.2		157.4	254.9	240.5		168.6	270.7	193.1
684	160.4	256.2	358.5		159.5	253.4	242.1		166.8	273.7	196.7
685	157.7	254.1	343.4		158.4	255.1	243.5		167.3	266.4	188.2
686	159.7	252.8	359.7		157.3	255.4	240.6		169.5	274.8	189.3
687	159.3	251.2	350.9		160.2	254.6	245.6		166.1	286.2	197.8
688	158.1	251	352.9		158.4	256.6	246.5		165.4	278.1	197.5
689	159.2	250.8	351.5		157.5	252.7	249.3		166.6	263.9	199.2
690	159.3	251.1	347.8		156.2	256.6	247.6		169.2	266.8	197.8
691	160.5	249.2	344.9		157.8	256.9	252.4		167.4	273.5	195
692	158.4	248.4	362		157.9	253.6	245.4		168.6	267.1	188.5
693	158.1	252	353.9		156.9	254.7	248.1		166.7	271.8	192.2
694	159.2	249.8	355		157.2	253.8	242.5		170.2	269.3	197.7
695	159.3	252	362.1		156.6	252.7	240.7		167.8	274.8	206.8
696	158.1	253.3	360.1		155.9	248.5	242		165.3	267.8	197.7
697	157.2	255.6	368.1		157.4	243.5	239.7		168.5	282.3	198.4
698	158.6	251.9	367.6		157.3	249.2	242.5		165.4	276.7	190
699	159.3	256.4	366.4		155.3	254	241.4		168.6	274.3	196.2
700	158.1	249.9	362.7		157.2	249.1	242.3		167.9	271.7	195.7
701	158.8	249.4	371.4		158.4	248.6	245.1		166.2	267.1	203.7
702	157.4	257.7	367.3		158.6	257	238.4		165.3	278.3	200.2
703	159.2	253.2	364		157.8	248.4	244.2		166.4	259.9	192.8
704	160.8	247.9	364.2		158.9	251.8	241.9		167.6	262.8	200.9
705	157.3	252.2	374.5		160.4	253.2	245.8		166.7	259.6	196.2
706	158.7	255.4	369.2		160.2	254.1	246.7		166.7	265.8	192.3
707	160.9	251.9	368		158.9	250.1	251.1		165.2	274.3	197.5
708	159.5	258.3	380.9		159.6	254.5	244.2		164.6	264.5	192.2
709	162.4	248.9	374.6		159.4	255.6	245.2		165	270.1	194
710	162.5	254.6	370.1		158.8	255.9	246.8		166.2	278.7	199.9
711	164.4	256.9	375.3		158.4	258	248.5		166.3	268.5	200.9
712	161.7	260.9	367.4		159.8	254.2	246.3		167.1	262.1	192.3
713	164.2	265.6	380.1		158.4	250.6	247.2		167.5	267.8	202.4
714	162.6	253.8	380.6		160.1	252.4	250.1		163.2	278.8	200.7
715	164.1	262.4	375.1		157.8	251.5	247.4		165.8	259.8	199.6
716	162.5	268	376.5		159.2	253.9	250.5		166.2	261.2	195.4
717	162.6	259.1	375.1		159	253.9	246.6		167	264.8	194.9
718	164.6	256.4	371.2		157.9	253.8	247.8		164.2	270.2	186.9
719	166.3	261.8	371.9		158.6	257.9	245.6		166.6	286.9	192.3
720	166.3	260.2	372.1		157.8	252.9	243.6		166.3	278.2	194.8
721	167	266.2	370		159	259.1	247.2		164.7	276.8	194.4
722	173.4	270.5	366.7		157.7	250.7	247		165.3	279.6	198.8
723	172.4	264.1	366.1		160.9	256.6	255		164.8	270.3	195.9
724	171.2	262.4	367.6		159.9	262.1	246.7		166.2	281.6	197.7
725	169.8	263.9	366.1		159.7	268.1	257		165.4	273.4	196.3
726	168.2	258.2	368.6		158.8	266.3	247.1		167	261.2	195.1
727	167.9	262.2	361.9		157.5	264.1	253.6		165	282.7	192.6
728	168.3	258.8	377.7		159.2	268.2	247.4		166.5	267.8	198.1
729	169	274.9	365.4		158.3	270.6	255.3		164.6	287.2	198.9
730	167.7	256	368.7		158.1	267.2	253.7		166.1	277.3	199.9
731	167.2	266.6	359.9		158	272.9	257.6		166.9	273	197
732	163.4	258	359.2		157.8	264.7	254.7		166.3	265.2	195.6
733	167.6	263.1	363.2		158.6	274.1	250.8		164.9	265.2	186.8
734	164	267.4	360.1		158.2	272.6	253.7		168.9	272.5	199.2
735	165.1	261.6	364.1		161.9	280.6	254.2		167.2	270.1	196.2
736	164.3	262.6	358.1		159.2	281.5	258.1		165	276.5	196.6
737	167.8	257.6	357		158.7	278.5	256.4		167.7	263.9	200.2
738	165.3	258.2	357		162	286.4	256.9		169.1	273.5	206.6
739	163.8	266	353.1		163	287.1	263.9		168.3	265.7	208.3
740	163	266.2	354.8		160.2	282.4	256		166	267.4	204.9
741	164.5	269.1	363.6		159.3	289.7	256.6		168.2	266.7	205.4
742	164.6	265.5	349.5		159.4	282.5	260.9		167.5	275.6	208.2
743	163.8	268.1	352.3		158	287.1	254.4		168.3	266.2	208.8
744	161.9	262.2	347.9		158	283.5	258.3		168.2	273.4	211
745	163.3	273.1	358.6		157.7	280.8	263.3		168.8	274	208.6
746	163.6	266.8	354.9		159.7	284.6	261		168.5	267.9	210.8
747	163.4	260	351.9		159.9	287	262.9		168.1	268.1	208.8
748	162.8	263.5	357.4		159.6	282.6	262.6		168.8	264.9	212.4
749	163.4	267.5	353.6		160.2	279.4	261		168.4	272	208.1
750	159.7	265.4	344		159.9	284.2	266.8		169	263	215.1
751	161.8	258.3	346.4		160	278.1	267.4		168.5	262.2	211.3
752	161.4	258.9	347.5		160	282.5	269.3		167.2	264.7	206.5
753	160.6	255.1	342		159	282.9	268.6		170.8	268.1	207.4
754	162.1	263	348.5		159.3	278.8	265		169.1	266.3	213.9
755	162.3	248.7	348.9		157.1	272.5	270.9		169.8	269.9	210.8
756	162.5	256.8	345.2		158	275.1	268.8		169.6	270.9	221
757	162.5	259.9	336.4		160.3	280.4	269.4		167.5	272.8	209.2
758	160.3	250.7	349.5		158.6	276.5	269.5		169	272.2	219.2
759	159.8	256.7	348.2		160.1	273.3	266.5		170	273.5	212.9
760	164.6	265.6	341.2		157.9	264.4	264.4		169.4	264.2	212.2
761	163.2	254.7	337.8		159.9	273.8	263.7		168.5	273	217.9
762	161.8	257.1	346.9		158.5	270	259.4		168.4	275.7	217.3
763	160.3	248.6	336.4		157.1	265.6	261.7		169.7	271.8	214.2
764	163.6	252.9	341.6		159.7	271.1	261.8		168.7	272	209.1
765	161.8	257.2	343.9		159.7	269	262.4		169.8	273.8	221.6
766	161.2	257.4	337.1		158.4	274.5	268		170.4	275.1	211.7
767	159.3	254.6	342.8		159.4	264.3	261.5		168.7	275.8	218.5
768	161.7	243.5	345.6		158.8	274.3	261.6		169.9	272.2	209.7
769	162.2	247.9	337		160.4	266.5	258.8		172.5	262.2	213.1
770	162.4	252.8	340.6		158.5	267	261.4		171.9	267.4	220.7
771	162.3	255.8	344.8		157.8	261.5	263.1		171.6	277.2	217.4
772	160	257.2	339.1		160	267.5	258.1		172.6	280.4	210.9
773	161.3	254.9	345.1		159.2	276.8	260.6		172	263.5	207
774	162.4	245.8	344.9		160.9	269.3	255.3		170.6	274.8	223
775	163.2	247.1	346.4		159.6	273.9	254.3		172.3	280.1	218.2
776	163.3	246.1	344.5		158.5	266.7	259.6		171.2	278.7	222.6
777	161.7	247.7	351.8		159.6	266.2	258.2		172.1	275	226.4
778	160	249.2	345.2		158.5	265.5	254.7		172.8	268.1	210.8
779	162.4	245.1	340.8		160.4	261.5	252.4		169.3	280.8	218.7
780	160.3	246.9	342.1		157.8	264.5	255.9		173.6	275.3	228
781	160.7	245.3	344.9		160.9	262.2	255.1		171.9	273.2	225.2
782	160	245.2	339.6		156.5	258.5	254.4		174	274.4	234.3
783	163.7	239.2	341.2		158.4	259	253.7		171.7	270.2	226.7
784	159.6	237.7	340.1		159.5	259.4	248.6		173	275.9	230.8
785	158.9	247	336.8		158.3	260.8	248.8		173.9	270.9	226.7
786	158.3	236.4	338.5		160.7	263.4	248.2		172.7	282.3	222.4
787	161.2	240.6	326.2		158.9	261.8	248.1		173.5	270.7	227.9
788	161.1	244.1	331.2		158.3	254.6	248.5		175.3	274.1	228.4
789	161.2	242.2	333.9		157.5	263.5	252.3		172.9	278.4	224.6
790	160.1	246.3	330.9		160.5	261.4	252.2		174.5	278.1	226.1
791	162.2	242.8	336.1		159.7	257.8	249.9		175	271.2	227.8
792	160.6	245.8	323		156.8	259	252.8		173.7	272	231.2
793	159	247	327.9		158.8	264.4	246.9		172.8	277.6	221.7
794	160.6	236.2	322.6		159.1	261	251.4		172.7	278.4	229.1
795	158.5	245.2	328		158.5	260.9	253.4		173.8	282.9	229.4
796	158.2	255.8	317.4		158.3	258.8	250.6		172.3	280	219.2
797	159.1	242.3	328.4		159.2	259.5	253.6		172	288.6	229.8
798	159.4	237.4	324.8		159.5	258	255		173.9	292.1	222.2
799	158.2	244.2	321.6		158.6	260.4	250.1		175.3	287.5	224.9
800	158.8	239.3	316.7		158.1	263.8	248.9		172.9	284.5	219.8
801	159.8	238.9	329.2		158.2	263.9	253.1		173.5	285.4	220.5
802	160.1	236.9	321.9		159.6	267.4	255.9		173.9	290.6	225.6
803	158.2	240.9	314.9		158.7	259.2	257.9		173.9	285.9	220
804	159	244.4	318.2		158.1	262.2	254.5		174.8	278.4	215.7
805	160.8	239.4	323.6		159.6	264.8	260.3		173.5	291.4	218.1
806	160.5	241.3	321		158.3	272.6	260.9		174	283.5	217.3
807	161.1	244.4	316.6		160.9	259.9	259.7		173.4	287.9	213.7
808	158.9	239.5	318.4		161.8	268.5	264.8		173.5	285.7	212.8
809	158.3	234.3	312.1		160.6	269	261.3		173.8	281	218.7
810	159.8	243.5	314.4		159.9	262.5	261.9		174.2	281.3	216.2
811	157.1	238.7	325.8		157.7	270.5	267.1		173.9	286.8	212.3
812	159.1	237.6	318.8		159.1	265.1	264		172.6	290	221.3
813	159.1	236.6	313.3		158.5	269.8	266.1		172.3	286.1	212.4
814	158.3	244.2	309.6		159.5	265.1	263.5		173.3	290.8	219.2
815	160	240.9	307.2		158.4	266.2	265.9		171	284.2	210.8
816	156.7	240.4	316.2		158.5	269.5	258.4		171.6	290.3	210.8
817	159.6	241.9	305.2		157.7	275.6	260.5		173.6	282.3	214
818	160.5	237.3	311.5		160	278.2	260.9		173.2	290.6	213.4
819	157.6	236.7	318.7		160.6	271.6	261		170.3	286.8	209.4
820	156.2	238.3	319.4		163	266	256.3		170.3	280.9	211.5
821	159.6	245.8	317.6		159.7	271.6	254.3		172	290.2	207.3
822	160.5	240.4	320.8		160.4	272.1	248.1		171.2	272.8	209.3
823	159.7	240.3	319.2		162	264.8	251.1		171.3	270	213.2
824	158.1	236	321.3		160.7	263	248.5		171.3	278.3	214.2
825	160.9	234.3	323.2		159.4	267.6	249.4		171.2	282	208.4
826	157.9	231.8	320.7		161.2	259.5	243.7		171.8	284.5	211.3
827	159.8	238	324.7		160	271.9	244.4		171.6	286	213.2
828	156.8	233	321.2		159.1	262.6	243.1		172.8	271.8	206.5
829	157.9	239	325.2		161	263.3	241.4		171.9	283.4	207.2
830	156.8	256.1	325.2		160.9	262.9	241.7		171.5	280.2	215.2
831	161.3	248	336.2		158	266.6	239.4		170.8	270.6	208
832	157.3	235.2	321.8		159.5	262.9	238		172.3	275.8	207.7
833	160.1	238.7	325.1		159.3	264.1	241.6		170.7	277.6	211
834	156.1	235.9	325.3		159.9	259.7	240.7		172.1	277.5	208.3
835	159.1	241.2	324.3		161	263.1	236.2		173.1	276.1	210.5
836	157.1	235.7	313.3		158.5	256.2	233.7		171.8	275.2	210.2
837	159.5	237.9	319.4		160.7	253.9	236.9		171.3	283.2	209.8
838	156.1	245.4	326.9		157.9	255.1	229		172.8	270.6	205.2
839	157.4	236.4	327.8		158.5	255.6	230.9		171.1	283.4	207.2
840	159.3	242.3	319.4		158.6	260.6	232.5		171.1	276.2	212.8
841	158.1	236.6	314.3		159.3	252.8	227.1		172.4	272.2	207.6
842	156.5	234.4	323.4		159.1	259.5	227.9		171.3	271.8	212.7
843	158.8	251.9	310.4		160.9	262.3	229.6		172.7	274.8	203.9
844	159.8	237.8	319.6		160.1	255.2	223.6		173.3	273.4	205.4
845	158	238.4	318.6		159.7	257.9	222.1		170.8	279.7	208.3
846	156.4	229.8	308.9		162.1	263.2	222.7		173.2	284.8	208.5
847	158.7	235.6	308.4		161.3	262.8	223.5		172.6	273.8	207.7
848	159.4	242.2	306.9		161.2	262.5	220.2		174	273.2	209
849	159.6	240.1	315.1		160.2	265	220.5		169.2	277.9	203.7
850	160.5	242.6	309.6		160.2	260.6	222.2		170.7	277.9	219.1
851	159.4	244.4	315.8		162.4	265	221.2		172.7	289.9	209.3
852	159.4	232.4	307.1		162.2	265.2	219.3		172.3	272.8	215.2
853	160.3	244	308.9		163.5	264.9	220.2		171.1	277.3	207.8
854	158.1	237.9	310.2		160.4	269.5	221.8		171.5	273.6	217.4
855	158.9	253.9	308.7		164.3	266.8	219.3		172.4	274.2	211.9
856	157.3	234	310.9		163	265.2	216.4		172.5	271.6	209.6
857	158.3	236.9	303.7		161.4	269.4	217.4		170.2	275.6	210
858	159.5	240.4	314.9		163.4	254.7	214		170	273.7	211.8
859	156.7	236.2	320.5		163.9	263.9	217.2		173	269.4	206.2
860	160.2	242.4	317.8		163.6	265.8	214.4		172.8	269.5	214.9
861	156.1	238.1	303.6		164.3	272.4	217		172.9	272.8	224.6
862	158.8	245.2	307.6		162.3	257.5	214.6		172	279.3	224.5
863	157.6	237.7	316.9		162.3	265.5	214.1		171.4	271.2	218.2
864	157.1	237	311.1		161.1	265.3	207.1		173.7	276.3	215.8
865	157.5	246.8	313.9		162.2	264.4	206.2		169.9	273.8	219.8
866	156.6	255.2	301.1		162.3	263.4	208.2		172.4	279.1	212.5
867	157.5	260	313.6		160.7	257.4	211.1		172.2	275.7	213.4
868	158.1	235.4	312.5		160.9	258.5	210.4		173	270.6	212.3
869	159.7	241.3	314.3		159.8	252.3	208.2		170.3	279.8	214.7
870	158.7	242.6	313.8		161.7	251.9	207.1		171.2	270.5	216.8
871	158.5	255.2	303.6		161	258.1	205.4		172.2	277.8	212.9
872	159.5	240.8	311.5		159.1	254.1	207.4		169.6	280.8	224.7
873	157.9	237.9	301.2		159.9	250.1	202.7		172.8	268.7	205.9
874	157.8	238	304.7		158.7	248.6	208.5		172.2	280.3	217.4
875	157.8	241.1	303.4		160.3	258.6	203.9		170.9	290	209.4
876	158.1	244.9	293.7		159.6	258.5	202.4		173.6	284.4	212.1
877	163.2	241.2	300.2		158.6	247.6	200.7		171.4	279.1	209.7
878	157.1	233.6	297.9		159.3	247.4	199.2		172	289.7	212.6
879	160.4	248.3	295.8		157.9	244.6	202.4		169.3	279	217.8
880	159.1	236.9	295.4		158	249.9	201		171	283.9	220.2
881	157.1	249.5	285.9		156	245.3	200.9		172.9	285.5	213.2
882	160.2	235.3	289.1		156.7	251.1	198.6		172.1	281.6	214.6
883	157.1	248.2	291.7		157	237.8	198.6		171.3	279.8	205.2
884	158.8	234.9	289.3		159.1	243.3	200.4		170.7	284.1	208.5
885	157.7	250	289		160.4	249.8	197.3		174.1	276.3	207.3
886	158.6	231.9	288.8		158.9	248.1	197.8		173.3	281.1	208.1
887	160.7	234.4	290.6		159.9	247.4	201.3		172.4	277.7	210.8
888	159.3	236.8	293.4		156.9	249.3	198		171.4	277.3	206.9
889	160.2	245.1	284.7		157.9	242.4	196.3		170.2	284.4	215.2
890	158.8	235.7	286.2		156.5	240.5	198.4		170.2	278.2	201.6
891	159.5	228.8	275.7		156.2	245.1	196.6		168.5	277.9	201.8
892	157.4	253.1	271.4		158.1	241.2	196.1		169.6	275.1	208.2
893	159.4	248.2	276.4		156.8	245.1	195		170	276.5	201.9
894	156.7	244.4	270.3		157.1	242.4	197.1		170.5	277.2	208.4
895	158.3	253	269.8		157.2	238.9	196.8		168.8	271.8	203.8
896	156.9	246.9	268		158.5	240.2	198.8		171.6	268.3	210.8
897	161.5	235.6	271.8		155.4	228.3	195.3		169.9	273.4	208.6
898	162.7	247.1	263.1		158.6	238.7	194.5		169.4	266.9	206.8
899	163.3	247.5	261		159.4	246.9	195.1		170.7	273.8	203.2
900	162	246.1	265.2		154.7	246.6	192.5		170	268.8	206.3
901	164	246.9	265.1		157.7	240.4	201.4		170	263.6	207.8
902	163.5	245.2	263.1		156.8	238.3	194.7		166.4	271.4	200.8
903	162.9	249	272.6		157.7	240.5	201.7		167.8	267	197.2
904	162.5	246.8	258.2		156.9	240.8	198.2		168.4	268.9	199.7
905	162.5	246.6	264.4		157.1	238.3	198.8		169.8	270.2	204.3
906	165.1	235.7	270.8		155.7	240.6	204.1		169.6	272.4	202.3
907	162.3	250.9	264.9		156.5	239.9	204.3		167.9	276	196.1
908	162.8	247.6	265.6		156.7	241	205.6		167.4	271.2	203.1
909	162.2	244	268.2		157.8	233.6	204.2		169	266.8	202.8
910	160.1	245.8	269.3		156.7	234.4	204.9		169	270.9	203.3
911	161.7	223.5	273.1		156.4	234.3	205.1		169.6	274.6	195.8
912	163	228.4	272.9		155.8	237.1	207.7		169	275.1	201.7
913	161.8	242.2	271.7		156.5	233.4	206		171	268.2	198.1
914	160.6	246.1	270.6		156.7	238.7	207.1		168.8	282.7	207.8
915	157.9	247.9	273.4		154.2	240.1	210		172.2	279.2	202.2
916	159.3	242.6	268.8		154.2	239.4	206.8		169.5	276.1	198.6
917	157	242.4	265		156.3	236.9	210.1		170.5	275.2	200.7
918	156.8	247.7	269.4		154.3	234.2	209.8		170.5	273.2	197.2
919	159.8	247	274.6		155.1	235.9	206.5		169.8	270.6	197.1
920	157.3	243.9	269.6		155.3	236.3	209.3		168.3	277.8	190.4
921	159.6	242.9	277.2		156.3	233.6	210.1		171.5	269.8	195.2
922	161.1	227.6	282.8		156.7	237.6	208.8		169.1	276.8	197.1
923	157.3	245.4	286.1		154.1	238.4	208		168.5	272.1	196
924	157.9	245.9	291.4		155.6	240.8	209.7		170	278	192.5
925	159.5	243.9	291.4		155.8	231.9	209.5		170.2	280	199.2
926	156.7	242.5	286.8		154.6	236.8	203.6		170.4	279.3	197.9
927	157.8	237.5	294.1		153.5	237	209.1		169.5	283.7	196.1
928	158.8	244.8	288.4		155.1	238.2	210		169.7	280.7	191.7
929	158.5	244.2	295.6		154.6	243.6	214		170.6	284.8	201
930	157.1	245.9	292.3		157.1	244.2	211.6		170	289.2	198.2
931	156.9	238.1	294.1		157	233	212.5		170.7	284	195.6
932	157.9	245.4	291.6		154.8	245.8	212.4		171.2	291.2	211.1
933	156	239.6	286.6		155.4	233.4	212.7		168	286.8	201.1
934	159.5	238.7	290.1		155.4	231.9	215.1		170.6	288.4	190.6
935	155.9	240.5	293.6		154.6	236.6	212.9		171.3	286.2	191.5
936	154.8	249.6	289.1		153.3	242.9	213.1		169.8	289.4	197.2
937	157.3	246.9	296.9		155.8	241.5	211.4		170.3	297.1	210.1
938	156	243.3	287.2		156	245.4	211.6		169.3	273	198.2
939	160.3	237.6	288.4		154.2	245.5	210.9		169.6	290.5	204.9
940	157.7	239.8	292.2		154.9	249.3	210		171.6	284.5	199.8
941	158.2	241	293.2		154.1	247.4	213.8		170.9	295	206.9
942	156.8	238.6	282.4		154.8	248	210.3		171.5	282.1	195.8
943	156.4	236.1	294.2		155.8	247.2	212.3		173.4	283.2	201.6
944	156.1	240.6	286.3		156.2	246.2	212.3		169.1	289.2	207
945	158	240	294.9		154.3	247.3	212.4		170	294.1	206.7
946	157.9	235.7	288.6		156.6	257	216.3		171.3	292.8	191.5
947	156.8	233	291.4		158.2	248.1	217.2		171.5	287.8	192.2
948	156.1	233.6	287.4		155.1	254.2	216.1		169.5	287.2	213.1
949	156.1	233.6	287.3		154.8	251.1	217.1		170.8	284.1	196.2
950	159.2	231.5	289.1		156.3	249.1	218.8		169.9	280.2	195
951	156.3	233.3	291.9		156.3	246.8	220.5		171.7	281.1	194
952	155.9	231.3	294.9		153.9	249.2	219.7		172.4	274	193.5
953	155.6	228.8	297.1		157.3	252.1	217.6		170.3	279.8	199.3
954	155.9	235.6	291.2		155.5	253.2	217.4		171.2	283.1	197.8
955	156.6	227.2	296		154.9	255.1	221.7		170.3	286.2	191.2
956	156	232.4	303.1		155.7	251.1	225.1		171.9	282.8	196.8
957	155.3	226.8	298.9		154.9	245.1	220.1		170.6	287.8	198.1
958	156.7	229.4	302.9		155.8	252.6	228		172.9	277.7	199.9
959	156.5	227.6	297.7		156.4	252.1	222.4		170.3	284.4	188.3
960	155	227.8	296.1		155	250	227.6		171.8	275.1	199.2
961	156.9	229.4	299.5		157.7	247.2	230.5		171.3	273.7	192.9
962	157.5	229	305.5		154.6	248.2	227.7		171.9	282.2	199.2
963	155.8	235.8	307.6		158.1	245.6	229		172.1	285.4	198.3
964	156.2	232.6	307.4		154.8	249.6	226.5		171.9	282.2	190.8
965	155.4	231.2	299.1		154.2	249.5	231.7		170.8	269.3	199.8
966	154.7	232.6	309.6		154.2	249.5	232.5		173.1	285.3	196.2
967	157.1	228.6	309.2		155.3	247.8	232.6		170.6	273.4	198
968	154.2	237.1	294.2		155.9	252.4	234.5		171.3	275.8	194.8
969	156.2	234.8	302.5		154.5	254.2	234.5		171	279.8	196.2
970	156.3	237.2	301.7		155.5	242.7	231.5		170	277	196.8
971	156.9	236.9	297.5		154.3	244.4	236.1		170.7	277.1	195.6
972	155.2	230.9	298.5		153.9	245.3	234.6		170.4	274.2	194.4
973	156.2	237.2	297.7		155.8	244.1	235		170	275.2	192.7
974	154.6	231.1	295.2		154.7	252.4	237.4		171.6	276.2	195.5
975	156.4	240.9	300.2		155.8	245.5	236.3		172.1	267.1	196
976	154.4	233.2	304.1		153.9	243.4	234.9		170.2	278.2	192.2
977	154.2	228.2	290.8		154.9	244.1	236.9		173.2	277.8	196.5
978	155.5	230.2	290.7		156.1	242.9	234.5		170.5	277.8	191
979	152.6	235.6	296.2		155	244.9	231.4		170.9	274.1	194.8
980	155	231.1	301.3		157.2	247.3	231.6		169.8	277.6	195.2
981	153.2	234.4	302.9		153.4	247.8	230.9		171.9	282.2	192.8
982	155.4	238.4	300.8		157.1	245.2	228.9		171.5	276.9	190.8
983	155.4	240.1	300.4		156.4	245.6	229.9		171.4	276.6	192.5
984	156.3	240.4	299.5		154.1	244.9	229.8		169.5	275	185.2
985	154.9	239.6	306.7		156.2	240.6	235.9		170.7	266.9	191.1
986	152	231.9	302.1		155.1	244.1	225.5		172.7	271.2	189.6
987	154.1	233.9	302.6		155.4	242.9	221.5		170.5	279.9	199.8
988	155.4	240	308.5		156.6	243.2	225		170.3	277.6	198.2
989	155.7	237.1	306		152.8	242.5	225.9		169.6	273	190.2
990	155.5	235.6	302.6		155.2	238.4	220.5		170.3	286.1	188.2
991	153.2	244.4	303.1		154.5	243.1	225.5		170.7	270.8	191.3
992	154.8	244.7	300.9		154.4	242.6	223.5		170	284.8	185.4
993	154.5	240.8	317		155.8	241.6	226.4		170.5	269.2	194.3
994	153.7	234.4	311.9		156	238.5	221.1		169.2	269.4	183.6
995	150.6	243.2	310.4		154.8	236.6	220		169.2	274.3	197.7
996	154	237.2	322.6		155	232.5	218.6		168.3	271.3	187.6
997	153.9	240.3	313.5		155.1	241.1	218.2		169.6	269.8	186.9
998	153.8	233.9	312.8		154.8	241.4	217.3		169.1	262.6	188
999	151.9	242.6	317.4		155.8	237.9	221.9		168.6	269.2	191.6
1000	155.7	239.2	318.4		155.6	237.8	223.3		169.7	269.2	192.7
1001	155.5	240.6	311.4		155.2	237.8	223		168.2	269.3	190.3
1002	154	244.6	324.6		155.7	240.8	224.5		168.4	269.8	199.8
1003	156.5	236.5	314.2		154.3	242.8	224		169	269.3	195.6
1004	155.1	240.5	316.9		154.4	242.4	224.5		170.8	272	199.2
1005	156.1	240.1	327.2		156.6	246.3	228.6		170.3	270.3	185.5
1006	156.6	241.6	324		155.8	248.9	228.5		168.8	262.4	193.4
1007	155.7	237.9	317.9		157.3	252.1	229.6		170	261.4	195.2
1008	156.5	242.2	332.1		154.8	250.4	230.2		167.2	270.4	196.9
1009	156	233.4	336.3		156	247.1	233.2		169.6	276	190
1010	154.7	234.9	329.3		157.9	250.2	230.6		169.9	272.8	199.8
1011	155.3	244.9	326.7		155.4	245.9	235.7		168.9	273.2	191
1012	155.4	244.1	325.4		154.4	248.4	233.7		171.4	268.2	204.5
1013	155.5	243.3	327.6		157.7	240.6	231.8		169.6	270.4	201.6
1014	155.7	238.1	326.2		153.4	249.5	229.7		172.1	257.4	199.8
1015	155.9	245.2	331.7		153.4	246.6	229.6		170.8	264.4	208.9
1016	156.7	244.2	324.6		155.4	247.6	225.3		169.6	265.4	202.1
1017	154.2	240.1	334.9		157.4	244.6	226.1		171.3	263.6	188.2
1018	155.2	245.6	316.8		156.7	244.5	225.1		170.6	265.8	207.5
1019	155.9	242	332.5		155.6	242.5	225.6		170.8	280	199.4
1020	154.5	244.7	329.3		156.4	242.4	222.8		171.5	266.5	189
1021	155.4	251.8	319.2		155.5	239.6	225.9		170.9	278.5	201
1022	154.2	242.7	321.2		155	241.8	226.7		173.3	277.2	201
1023	156.3	249.1	333.2		156.6	241	223.5		171.1	271.1	198.2
1024	155.3	249.6	335.2		156	243	230.7		170.7	267	203.2
1025	155.2	246.6	326.9		155.8	244.4	230.5		171.6	269.8	199.2
1026	156.2	247	333.4		157	243.4	228.9		172.7	270.7	199.6
1027	154.5	250.4	326		156.4	241.8	233.4		172.9	271.7	200.8
1028	155	246.2	326.1		156.4	241.5	233.4		172.1	270.5	199.1
1029	153.6	247	328.1		154.8	243.2	228.6		171.5	282.8	205.7
1030	154.7	248.6	325.7		153.9	237	225.4		172.7	282.2	206.4
1031	154.7	247.9	334.8		156.3	239.2	229.6		171.6	278	198.7
1032	154.5	244.6	318.7		155.8	241.4	229.4		171.5	274.8	207.4
1033	153.7	247.1	328.4		156.6	238.9	230.6		173.3	276.5	208.8
1034	156.6	248.3	338		155.2	234.9	226.7		171.8	282.8	209.6
1035	155	249.7	333.6		156.1	234.6	232.8		171.7	279.4	207.2
1036	156.9	251.1	339.2		156.6	233.2	236		173.3	275.9	210.3
1037	155.6	244.6	346.3		154.9	233.6	233.5		171.5	281.2	206.4
1038	156.7	252.8	340.6		156.8	243.5	229.6		172.1	287.2	205.4
1039	156.2	250	335.8		158	239.4	235.1		173.7	267.1	207.4
1040	157.5	250.9	346.4		157	240.7	235.9		170.6	285.2	207.5
1041	156.8	255.9	342.9		154.8	232.9	235.2		173.2	271.8	193.5
1042	157.6	246.8	346.9		157.6	233.1	241.5		172.7	285.1	200.9
1043	156	248.2	341.6		155	244	238.5		171.9	285.8	202.5
1044	156.7	253.5	342		155.1	238.2	241.1		173.6	275	204.9
1045	155.3	245.8	335.6		154.7	240.2	239.4		173.4	267.6	199
1046	156.1	243.1	348.8		157	236.5	234.1		171.9	286.2	202.6
1047	159.1	245.9	359.6		157.7	241.8	238.8		171.9	269.2	205.8
1048	155.9	244.8	340.8		153.8	239.2	236.2		172.2	284	208.4
1049	157.4	245.8	346.6		154.3	239.6	234.8		171.1	273.7	201.8
1050	156.3	252.1	349.4		156.1	244.8	233.4		174.8	284.5	207.6
1051	156.3	240.3	342.6		155.7	243.2	230.3		170.5	269.9	200.8
1052	155.8	242.5	343.2		153.9	239.1	229.9		171.3	276.8	200.8
1053	155.6	251.7	344.6		155.5	240.9	230.3		172.3	281.8	203.1
1054	158.4	247.1	337.4		156.2	244.6	228.4		172.9	280.1	195.8
1055	156.2	247.9	343.8		154.7	241.2	227.7		172.2	277.9	194.8
1056	155.4	247.9	333.6		154.7	242.5	233.9		170.6	272.4	193.9
1057	157.4	251.7	340.6		155.4	245	228.6		172.6	269.5	200
1058	157.4	244.6	347.2		154.8	246.5	230.4		174.4	280	202.2
1059	156.4	249.5	351.6		156.7	240.9	226.7		173.9	272.1	192.5
1060	157	247.5	346.1		157.4	248	230.2		172.2	268.8	190.5
1061	156.1	239.5	344.2		157.6	241.9	231		171.7	278.2	190.8
1062	155.6	245.1	338.8		154.5	243.2	232.1		170.9	267	197.8
1063	156.3	255.3	346.9		157.8	249.2	234.2		173.1	275.1	198.2
1064	155.6	247.9	346.5		158.7	242.6	235.8		170.9	276.8	204.3
1065	154.3	247.2	343.2		159	245.6	237.6		173.6	284.3	198
1066	155.1	250.1	346.4		159	247.9	242.7		171	273.5	193.7
1067	156.5	240.5	349.8		158	240.3	239.9		171.1	271	193.4
1068	157.5	252.2	338.4		157.4	242.7	239.8		171.7	272.1	199.8
1069	155.7	250.7	338		157.5	241.8	242.5		172	271.6	192.4
1070	156.6	244.9	348.9		156.1	241	237.6		170.2	267.1	195.6
1071	157.2	247.8	345.8		158.6	247.4	239.9		169.3	272.8	193.8
1072	155.1	239.1	347.9		157.9	251.9	243.6		170.4	263.7	195.4
1073	155.3	249.9	349.1		156.7	236.2	243.2		172.2	271.7	192.6
1074	155.8	242.7	338.9		156.4	244.1	238.2		173.9	272.7	196.1
1075	154.6	240.9	348.9		157.8	244.6	244.2		171.1	271.5	195.8
1076	152.3	247.3	342.9		158.6	244.8	247.4		172.7	266.6	194
1077	155.3	242.8	333		156.9	245.1	245.9		170.6	277	194.6
1078	156.9	246.3	349.4		156.2	247.9	243.3		172.8	271.5	194.8
1079	155.3	246.3	345.9		156.1	248.6	244.9		171.8	271.4	195.6
1080	155.7	248.4	350.4		156.3	250	246.7		172.5	264.4	194.7
1081	156.3	249.4	344		159.5	253.6	250.1		170.2	268.7	200.2
1082	156.6	249.9	350.7		157.5	257.9	250.7		171.1	271.1	193.2
1083	157.2	246	342.4		158.9	258.5	251.2		174.2	269.8	197.6
1084	155.9	251.2	344.9		156.8	255.9	251.6		171.9	275	197.5
1085	155.2	247.9	336.1		155.6	254.9	258		169.7	272.8	197.6
1086	155	252.1	351.9		157.3	254.5	261.8		170.4	271.5	193.2
1087	157.5	242.8	339.6		157.9	258.6	261.7		174.1	261.3	198.3
1088	157.2	246.6	342.9		157.2	255.4	257		172.4	266.7	196.6
1089	155.9	249.9	342.6		157.4	254.4	259.7		172.1	255.3	192.6
1090	157	244.9	333.6		156	254.9	259.4		171	272.8	193.1
1091	158.7	249.6	348.2		156	251.6	259.6		170.6	261.8	192.8
1092	155.4	245.6	338.9		155.8	255.4	261.9		169.5	267.8	198.9
1093	157.7	250.5	336.4		158.3	257	261.4		168.7	272.1	193.4
1094	156.7	248.6	332.9		158.3	257.1	263.9		172.2	270	198.8
1095	156.6	243.6	341.8		156.7	252.3	261.6		170.8	270.3	191.3
1096	155.3	244.8	338.4		157.1	244.9	270.8		170.5	270.7	205.1
1097	155.2	249.4	334.2		155.3	254.4	272.2		169.8	265.6	197.2
1098	156.9	247.5	329.2		156.9	248.1	263.7		168.7	274.2	192.3
1099	157	247.7	333.1		158.2	249	272.1		169	262.8	196.8
1100	157.7	247.2	331.6		157.9	255.2	274.6		168.7	278.2	191
1101	158.2	246.5	334.2		158.2	253.8	274.5		170.3	281.4	188
1102	154.7	247.9	335.5		156.5	255.5	277.3		168.8	265.6	194.2
1103	157.1	249.2	335.7		157.7	251.6	269.1		169.7	276	201.6
1104	155.1	250.1	326.7		156.2	261.1	277.8		169.8	275.6	197.8
1105	157.1	249.4	318.4		158.5	250.6	270.7		170	276	207.8
1106	156.4	248.1	328.1		159.6	254.9	266.6		170.1	274.2	198.8
1107	154.2	237.4	319.1		154.8	256.8	267.1		166	281.1	202.4
1108	157.3	241.6	315		155.7	252.9	270.4		168.3	282.4	197
1109	156	248.4	321.1		155.8	252	264.5		168.8	274.9	201.2
1110	156.8	245.1	318.9		155.9	259.5	266.1		168.7	278	207.7
1111	158	248.9	315.1		157.4	256.4	257.8		167.8	278.8	197.2
1112	158.6	241.1	311		154.6	254.9	262.8		169.2	277.2	206.2
1113	155.9	245.4	312.4		158.2	259.5	260.2		170.1	272.1	203.2
1114	155.5	236.6	317.7		157.9	264.5	259.9		166.9	270.5	205.2
1115	155.4	235.6	311.8		158.2	267.1	265.2		169.5	265.5	199.9
1116	156	244.2	307.6		156.3	258.6	259.8		167.2	272.7	201.1
1117	156.7	242.2	305.7		157.9	265.9	254.5		170	275.2	207.5
1118	158	243.6	304.1		155.5	265.4	246.6		167.1	276.5	212.7
1119	158.1	239.4	306.9		155.7	259.1	249.2		167.5	275.5	210.8
1120	157.7	238.4	306.1		154.9	260.8	248.3		167.7	271.2	207.8
1121	157.5	239.1	301.7		156.6	259	243.6		165.8	265	205.2
1122	157.4	238	308.1		155.9	263	242.3		165.5	272.1	212
1123	157.5	245.9	310.1		155.2	251.2	231.8		170.2	270.5	204.1
1124	155.3	236.8	307.8		155.7	255.1	238.4		169.9	265.5	196.7
1125	154.7	236.7	313		158.2	253.4	237.6		167.5	255.1	195.7
1126	155.8	239.4	309.1		156.3	257.3	235.3		168.6	262.3	196.5
1127	156.1	241.8	305.6		153.8	256.1	228.4		169.9	268.9	203.7
1128	160.8	243.2	315.2		153.3	252.8	231.1		168.4	282	212.1
1129	155.4	241.7	306.8		155.8	253.9	224.6		169	263.8	203.8
1130	154.9	240.9	314		156	255.6	225.4		167.8	268.5	214.2
1131	157.6	239.6	311.5		156.4	254.6	231		167.2	266	211.1
1132	156.2	243.2	317.2		156.2	249.6	218.7		170.5	268.3	214.4
1133	156.6	234.9	306.9		158.2	255	218.9		167.3	259.2	200.1
1134	155.5	240.9	300		156.8	249.6	218.9		170.8	268.2	211.8
1135	155.3	243.8	312.2		155.9	247.8	218.5		167.1	265.6	213.1
1136	155.2	238.2	299.7		154.6	248.6	214.2		166.6	268.1	209.2
1137	156.4	237.9	305.1		155.7	250.4	213.2		169.3	273.4	217.2
1138	155.8	241.4	308.2		154.3	247.8	214		171.2	265.5	215
1139	157.1	232.7	311.2		156.7	242.2	212.1		168	270.2	200.9
1140	157.2	241.5	312.4		156.5	242.3	213.8		170.5	269.7	212.2
1141	154.3	232.1	304		156.8	242.5	212.2		171.6	266.6	211.5
1142	154.3	232.8	312.2		155.1	241.6	207.5		172.4	282.8	215.3
1143	154.8	243.8	305.3		156.6	245.6	209.2		174.2	272.4	212.4
1144	153.6	236.8	297.5		159.4	242.1	213.2		176.6	271	207.8
1145	155.8	238.8	307.6		156.5	240	211.9		175.8	270.6	218.9
1146	155.3	236.3	310.8		156.3	249.6	210.1		176.7	266.7	216.2
1147	154.8	236.7	307.3		158.3	243.6	209.7		173.8	265.6	215.9
1148	155.7	237	308.6		156.6	240.4	212.6		176.3	270.8	217.8
1149	153.5	241.9	302.3		158.2	241.6	213		173.2	266.8	212.1
1150	154.9	225.6	315.6		158.7	239	211.3		173.5	272.8	214.8
1151	155.2	239.3	319.2		159.7	237.9	212.1		171.7	269.2	207.9
1152	153.5	241.4	310.7		157.5	235.4	207.7		170.7	261.7	211.9
1153	155.7	239.9	317.6		157.9	247.4	211.4		172.6	263.3	211.6
1154	155.4	237.2	311.3		157.8	242.8	209.9		173.4	270.7	217.2
1155	152.7	236.2	311.3		157.9	238.6	214.2		173.2	271.9	209.2
1156	154.2	231.1	322.1		158.3	238.8	214.5		168.9	262.8	216.2
1157	156.1	238.8	329.2		158.5	236.6	219.9		170	271.9	216.5
1158	154.5	235.9	324.6		158.9	238.4	219.5		171.6	276.8	213.2
1159	152.6	235.6	327.2		155.4	237.6	219.5		167.4	269.4	214.1
1160	153.7	231.6	322.8		157.6	238.6	221.1		168.3	265.2	214.2
1161	154.4	232	319		158.3	241	223.7		169.3	277.8	218.6
1162	154.1	245.3	329.4		155.4	248.6	221		167.6	264.5	213.9
1163	152.9	236.2	332.6		157.6	243.9	228.9		169.7	272.2	210.4
1164	154.9	231.6	329.9		155.8	243.4	226.3		167.3	275.3	220.4
1165	151.9	232.2	336.1		157.6	239.4	226.6		168.6	271.8	215.2
1166	152.3	241.4	342.1		157.7	248.8	226.9		166.8	277.2	210.8
1167	153.8	243.2	342.6		156	244.7	228.3		168.2	277.6	211.7
1168	154.6	238.5	330.5		158.1	245.1	228.6		167.4	276	213.8
1169	154.8	233.9	338.7		156.2	245.4	228.7		165.6	272.9	209.8
1170	153.8	229.2	342.4		155.6	240.1	228.7		169.8	266.2	205.9
1171	154.9	242.8	344.8		156.9	243	226.9		173.3	270.4	208.4
1172	154.4	238.8	342.9		155.2	240.4	225.8		178.4	281.4	209.2
1173	153.3	243.5	337.1		157.4	243.8	225.1		183.3	277.6	213.1
1174	152.9	235.8	341.9		154.1	241.9	228.6		189	283.3	212.2
1175	154	240.1	350.9		156.2	243.6	231.7		189.7	281.7	201.6
1176	154.7	238.1	357.6		155.7	241.1	224.6		192.4	283	207.7
1177	153.5	234.4	338.8		155.1	239.6	232.5		192	273.3	207.3
1178	156.2	229	341.3		155	243.9	228		191.6	274.7	208.1
1179	153.4	232.1	348.5		157.3	244.4	224.9		194.4	275.7	209.1
1180	152.9	226.1	348.6		156.2	241.9	225		192.9	272.8	206
1181	154.2	232.7	350.4		158	244.8	230		197.7	283.3	206
1182	154.6	230.5	347.4		156	236.9	232.1		199.6	273.1	202.1
1183	153.1	236.4	351.3		156.9	245.4	228.4		201.1	270.7	204.5
1184	153.2	239.9	358		157.3	236.6	224.4		197	278.1	210.1
1185	152	231.1	348.1		156.3	238.8	219.9		197.2	272.1	202.8
1186	153.3	236.7	347.1		155.9	241	224.1		193.2	273.8	205.2
1187	154	233.9	352.4		156.3	238	229.2		194.6	279	197.9
1188	153.1	231.2	349		153.6	239.6	231.2		195.3	271.7	209.2
1189	152.9	235	348.2		156.4	233.1	225.3		190.8	278.1	197.2
1190	155.4	237.6	342.5		155.1	240.1	227.8		193.3	263.7	197.8
1191	155	234.4	352.6		155.7	237.8	233		188.2	271.7	203.3
1192	154.7	234.2	346.2		154.8	235.6	227.5		187.2	271.7	191.3
1193	155.9	236.4	344.6		153.5	237.6	233.5		186.8	279.2	203.1
1194	151.8	232.4	342.4		155.6	238.8	230.4		184.7	275.8	200.3
1195	151.8	240	344.6		154.8	238.2	236.3		182.1	282.5	197
1196	153.4	234.1	345.1		153.7	235.1	228.3		182.8	278.9	199.7
1197	154.4	242.9	337.6		155.7	235.7	234.4		182.7	279.7	204
1198	154	236.6	341		156.2	242.4	235.3		178.8	269.3	200.7
1199	152.9	243.9	337.9		156.3	239.1	237.5		177.9	274.8	197.6
1200	153.5	233.2	329.1		156.4	235.4	236.3		177.2	282.3	204.8
1201	153.9	231.8	332.2		156.4	240.9	233.6		177.9	273.5	196.9
1202	154.3	231.5	342.6		153.7	237.6	236.5		175.4	276.2	197.6
1203	154.4	231.9	331.1		155.3	241	234.3		175.9	272.9	204.7
1204	151.7	234.4	326.5		155.4	241.1	235.6		176.9	284.2	204.6
1205	155.1	231.7	333.4		155	231.6	234.5		173.6	276.8	199.5
1206	154.1	238.4	331.8		157.5	245.1	237.3		171.5	285.3	194.2
1207	153.8	234.1	332.4		154.4	240.8	240		172.3	269.2	195.4
1208	152.6	228.8	321.1		155.9	238.9	234.1		171.6	278.7	196.4
1209	155.6	230.8	313.4		155.8	233.7	233.7		169.3	279.4	200.5
1210	153.9	233.6	333.8		153.9	234.9	231.6		172.7	277.1	203.2
1211	153.3	235.8	321.8		152	242.5	235.4		170.3	278.5	190.2
1212	154.7	235.9	329.8		155.6	237.8	234.3		169.2	282.2	193.3
1213	154.4	231.9	326.4		152.4	244.5	232.7		167.8	277.1	194.3
1214	154.2	232.3	327.7		153.4	247.2	236.4		169.9	274.8	194.7
1215	154.9	236.6	331.2		154.5	242.9	230.4		169.3	273.8	192.3
1216	153.3	239.7	329.8		155.1	239.1	237.4		169.9	279.5	182.5
1217	152.4	231.9	331		156.1	244.9	237.4		169.6	271.6	195.8
1218	155.6	237.4	325.7		155.1	235.1	235.1		167.4	279.8	205.7
1219	155	236.9	323.7		154.1	244.1	238.8		167.7	273.4	191.4
1220	155.3	237	324.4		155.1	238.3	236.9		167.2	268.6	192.1
1221	155.1	234.6	323		155.8	235.6	239.1		164.8	274.9	192.2
1222	154	234.7	328.9		155.4	235.9	240.2		167.2	279.3	190.1
1223	155.3	226.1	330.6		153.4	237	236.1		167.5	279.8	192.7
1224	154.8	232.6	323.8		153.5	236.1	236.4		167.6	274.2	191.4
1225	158.4	227.1	333.8		156.7	234.4	236.2		165.8	272.1	197.2
1226	155.3	235.7	324.1		157.1	241.2	237.3		166.2	283.2	193.5
1227	154.7	231.7	336.2		156.4	244.8	235.1		167.2	281.3	190.7
1228	157.1	235.4	333.2		153.3	236.1	235		166	263.7	190.4
1229	155.1	233.1	334.6		155.3	239.6	236.5		165	267	190.5
1230	155.2	237.9	323.2		154.2	237.6	239.4		166.3	282.7	187.4
1231	158.6	236.2	327.1		154.9	239.2	238.7		167	280.1	190.1
1232	155.4	234.8	342		154.6	245.8	236		167.2	268.2	190.8
1233	155.7	236.6	333.1		152.8	239.8	238.8		166.3	271.6	189.7
1234	157.2	236.6	333.6		153.4	237.9	236		165.2	269.8	192.8
1235	156.5	234.3	338.5		152.4	239.2	236.9		165.4	267	190.2
1236	154.6	233.9	335.2		154.5	239.7	239.3		166.9	276.2	186.3
1237	156	235.5	335.2		156.7	242.8	240.8		165.2	268.8	188.7
1238	157	234.6	335.9		154.7	242.3	241		165.5	276.4	187.2
1239	157.7	232.8	336.6		154.2	238.9	236.1		162.9	280.5	186.1
1240	156.3	244.9	339.7		154.7	243.4	242.1		165.4	277.7	190.4
1241	157.9	235.7	344.8		152.7	231.4	242.4		163	274.4	189.6
1242	157.2	234.8	328.7		154	238.4	242.8		166.7	273	191.4
1243	158.4	243.2	337.7		155.1	241.4	250.1		166.8	276.8	192.8
1244	156.8	242.8	335.5		154.9	234.1	249.3		165.5	276.8	191.4
1245	158.9	245.1	344.2		155	239.4	256.1		165.8	273.7	191.4
1246	159.8	239.1	336.1		155.7	250.6	248.6		166	262.3	193.3
1247	156.7	235.4	337.2		156.8	249	257		167.1	275	186.9
1248	156.6	240.9	348.4		155.2	243.1	256.9		168.3	278.5	187.2
1249	158.7	240.1	344.1		153.9	240.1	255.3		167.6	270.9	188.8
1250	154.4	235.9	342.2		154.7	242.2	259.1		169.9	270.1	188.8
1251	157.3	250.7	340.5		157.8	246.6	254		168.3	270.3	191.3
1252	160	242.6	348.7		154	244.1	254.9		171.1	265.5	190.9
1253	159.6	238.5	347.2		154.8	247.1	258.8		169.2	264.8	188.1
1254	158.7	238.7	355.6		154.5	247.2	257.3		169.7	264.6	190.5
1255	159.9	240.6	357.9		154	247.5	254.2		169.9	264.7	182.5
1256	161.2	237.3	349.3		154.6	244.6	255.4		170.7	273.1	186.8
1257	157.4	244.9	350.8		154.6	243.6	254.7		169	266.2	190.9
1258	160.5	240.4	347.9		156.5	244.3	254.6		168.2	272.5	186.1
1259	161	241.1	353.9		155.4	249.4	258.2		169.4	267.5	184.5
1260	157.9	237.6	346.6		155.2	240.8	252.3		166.2	274.2	188.7
1261	156.6	236.4	361.1		156	247.4	251.2		169	269.6	186.2
1262	158.3	244	348.2		155.2	246.1	251.6		166.1	269.8	187.1
1263	158.2	240.8	346.8		154.4	240.5	247.7		164.7	288.3	190.4
1264	159.6	247.2	360.4		156.7	241.9	242.4		167.9	270.8	188.9
1265	158	238	344.1		154.1	250	242.9		166.3	273	194.7
1266	157.2	237.6	351.7		154.1	247.3	240.8		168	278.5	187.8
1267	159.1	242.8	351.7		157.8	244.4	241.7		165.6	264.2	192.2
1268	158.6	244.4	350.2		156.8	240.5	239.9		165.2	268.8	185.3
1269	158.8	241.2	350.6		154.5	246.5	235.7		166.9	277.5	190.2
1270	157.4	236.5	354.2		157	248.4	235.8		165.6	276.3	187.6
1271	160.1	240.3	352		154	251.1	236.2		166.4	281.6	191.2
1272	156.8	237.8	348.9		156	248.9	229.6		165.2	273.6	188.9
1273	158	239.1	343.8		155.2	253.5	230.1		166	274.2	189.8
1274	157	238.9	350.7		156.3	249.7	231.1		165.6	261.6	185.9
1275	158.9	237.9	340.1		156.7	242.6	231.8		165.9	270.7	189.8
1276	158.9	242.6	341.4		155.9	249.8	226.1		163.5	276.3	188.2
1277	158.6	240.7	341.7		156.8	250.4	228.2		164.7	269.5	183.8
1278	159.4	231.6	343.2		155.8	256.8	229.6		166.9	274.8	184.8
1279	158.1	238.1	339.6		157.9	248.8	228.2		165.6	271.7	191.1
1280	159.5	240.8	339.8		156.1	249.2	229.6		167.1	266.5	189.8
1281	158.8	240.1	335.9		155.8	243.2	229		167.4	266.2	180.9
1282	158.2	238	342.2		156.1	249.9	225.1		168.1	277	188.2
1283	157.7	244.9	339.1		154.9	246.8	229.6		167.1	267.2	181.6
1284	160.6	238.9	338.9		153.9	241.8	228		168.2	269.8	188
1285	159.3	236.2	340.1		154.5	247.6	225.9		168.5	271.6	187.8
1286	160.5	246.6	339.8		154.1	255.4	233		165.8	267.9	183.4
1287	159.2	246.2	329.4		157.7	247.8	229.7		165.3	281.4	181.9
1288	161.1	240.8	339.9		155.2	243.9	236		166.2	276.5	187.8
1289	158.8	238.7	330.8		154.9	248.1	235.6		168.3	268.7	191.3
1290	160.6	239	333.6		158.3	246.2	234.6		170.1	267.4	192.9
1291	160.6	238.8	335.8		155.1	248.6	231.7		169.3	268.9	186.4
1292	159.6	236.7	325.4		154.4	240.9	238		171.9	269.7	187.5
1293	160.1	239.8	337		155.4	247.5	235.6		170.2	269.6	185.3
1294	159.5	240.1	330.2		156.6	258	239.5		170.7	271.8	192.8
1295	158.7	248.8	326.6		154.7	245.6	240.4		169.8	270.8	180.4
1296	158.6	240.8	315.8		155.3	254.1	238.2		169.4	275.3	190.7
1297	159	240.2	329.9		156.9	260.5	250.3		169.4	280.6	190.8
1298	157.9	234.6	324.3		158.6	259.8	247.3		171.7	267.3	187.3
1299	159.9	237.2	320.8		155.8	241.3	250.2		170.9	273.2	192.1
1300	159.6	241.2	331.5		156.5	245.4	248.2		169	275.9	190
1301	160	242.2	322.2		156.6	251.3	251.3		168.8	264.6	186.4
1302	161.7	238.8	324.1		156.6	256.5	255.4		168.7	254.2	188.1
1303	158.2	238.1	326.2		155.8	239.8	245.5		169.3	263.1	192.2
1304	160.4	236.8	327.6		156.6	250.2	254.6		169.9	270.3	190
1305	159.7	240.9	324.4		156.1	242.5	250.3		167.6	263.3	191.5
1306	158.4	239.8	324.9		156.4	262	257.1		165.3	277.3	193.5
1307	157.4	238.8	325.5		154.8	229.8	251.4		166.7	265	185.5
1308	157	247.4	331.4		155.4	241.9	261.2		165.5	261.1	192.6
1309	155.5	236.2	324.9		156.4	244.9	253.7		168	266.9	187.8
1310	159.9	236.8	317.5		156.3	245.8	260.3		166.2	270.3	188.2
1311	158.9	236.6	317.9		157.4	258.4	258.9		166.4	265.4	190.8
1312	157.7	230.9	319.1		155.6	258.7	257		168.2	270.7	186.5
1313	157.9	237.7	319.1		156.5	260	267		167.1	268.3	184.3
1314	155.3	241.9	307.6		155.4	249	257.9		166	265.8	184.9
1315	157.9	228.7	319.3		157.3	257.1	258.8		165	267.7	192.3
1316	157	230.3	319.2		153.8	244.8	257.8		166.5	275	186.7
1317	158.3	235.4	307.8		156.2	249.9	252.6		165.9	273.1	184.7
1318	157.2	237.6	318.5		157.5	264.9	261.5		165.3	270.7	192
1319	155.8	230.2	315.5		156.1	250.6	256.4		165.9	269.3	190.9
1320	157.8	231.4	314.9		155.1	244.9	253.2		164.1	270	182.8
1321	157.4	232	322.7		155.1	262.5	262.4		168.5	270.6	197.3
1322	158.2	236.8	308.9		156.3	267.4	257.4		167.8	274.2	191.6
1323	158.5	232.4	308.7		156.4	246.1	251.4		166.4	268.2	190.2
1324	160.1	231.2	311.4		156.4	255.2	256.8		167.3	273.3	191.8
1325	156.7	241.9	306.8		156.4	254.1	257.5		164	270.7	185.8
1326	155.6	225.6	309.8		157.2	241.2	255.8		165.6	269.8	187.7
1327	158.7	230.1	308.4		157.8	270	261.8		166.5	267.8	190.8
1328	156.4	234.2	304.8		155.9	266.7	260.7		163.6	264.9	187.2
1329	156.9	235.1	310.2		155.4	242.9	257.6		164.4	267.5	189.2
1330	158.1	229.7	301.4		156.7	251.8	257.6		166.1	276.7	189.6
1331	158.3	233.5	308.9		155.7	264.9	266.1		164.4	273.1	192.3
1332	157.3	233.5	312.8		157.9	265.9	265.2		167.6	270.9	184.9
1333	159.9	235.3	310.8		158.5	269	261.9		165.9	265.9	193
1334	159.5	236.4	302.2		158.3	269.5	262.8		167.3	268.8	189.9
1335	159.3	230.6	304.6		158.5	240.9	259.5		168.5	267.9	193.2
1336	156.7	234.9	307.4		157.5	270.6	265.5		166.9	274.7	191.5
1337	160.4	237.2	306.5		159.2	268.2	263.6		167.4	275.3	194.9
1338	159	235.6	303.4		159.2	273.8	261.3		166.9	272	195.3
1339	157.4	237.1	297.2		159	250.1	253.9		168.2	274	194.2
1340	157.2	233.6	304.4		159.4	268	259		167.5	269.7	194.9
1341	158.8	236.8	308		159.8	266	253.9		166.7	265	187.8
1342	157.9	230.9	298.9		156.6	250.4	251.9		166.3	281.1	183.8
1343	157.9	229.9	302.2		158.2	267.7	254.8		169	272.5	191.2
1344	157.7	235.6	297.7		160.1	265.1	260.6		167.8	268.2	194
1345	160.2	238.7	305.9		159.3	257	258.5		171.9	272.3	185.2
1346	159.4	231.7	301.9		158.2	248.1	247.4		173.8	273.4	189.1
1347	158.8	232.8	305.3		159.3	261	256.4		176.8	266.2	192.8
1348	159.2	232.8	308.4		158.9	262.7	256.4		175	280.7	193.3
1349	159.9	234.2	306.1		157	242.6	249.4		173.8	270.8	192.8
1350	161.1	237.2	312.6		158.8	257.1	251.2		174.7	271.9	192.2
1351	158.4	231.2	305.8		159	258.9	252.5		174.6	279.4	189.1
1352	160.2	235.7	307.8		155.5	245.1	245.5		171.8	273.3	185.2
1353	158.2	232.4	314.4		157.7	260.7	249.9		173.4	269.7	201
1354	161.4	240.6	321.9		156.9	242.4	247.6		171.7	271.3	187.8
1355	161.5	234.2	314.4		156.6	249.8	251.3		170.8	268.2	197
1356	162.2	234.8	305.9		158.3	262	252.9		170	270.6	194.4
1357	159.4	240.2	314		159.9	256.8	248.3		169.4	272.7	199.9
1358	160.4	233.6	320.4		155.7	245.1	242.1		169.7	274.8	195.8
1359	162.2	238.2	321.5		158.7	241	242.3		170.2	271.8	188.8
1360	158.1	235.2	317.9		157.1	256.1	250.9		168.1	269.1	190.7
1361	159.1	233.5	329.6		158.1	246.8	247.5		170.5	285.4	192.7
1362	159.9	231.8	313		157.3	249.5	244		169.2	269.9	193.2
1363	162.1	237.6	324.6		159.5	245.4	244		170.9	272.4	188.9
1364	161.4	240.8	317.4		157.2	243.7	237.3		171.5	282.2	201.7
1365	160.4	236.1	324.2		158	239.2	237		171.1	271.2	193.8
1366	161.2	242.2	326.6		155.1	239.6	232.5		172	267.9	189.6
1367	159.1	234.5	320.4		157.7	250.9	234.6		169.2	281.4	200.9
1368	159.7	237.6	318.2		156.3	248.6	238.4		171.8	273.9	192.2
1369	157.1	237.4	312.8		153.9	248.6	228.3		170.6	278.7	196
1370	157.5	231.9	315.1		156.3	247.4	232.1		171.8	271.6	192.2
1371	158.6	225.4	325		158.3	251.5	232.1		175	276.2	189.7
1372	160.4	235.2	316.9		155.7	247.2	231.9		177.8	274.3	196.6
1373	161	235.3	314.3		156.4	250.4	228.2		178.9	267.8	194.8
1374	159.4	228.8	317.9		155.8	234.9	223.8		183.3	266.2	191.2
1375	158.8	235.1	314.5		154.4	236	229.6		179.4	270.1	192.7
1376	159.5	225.2	332.4		156.1	235.4	218.9		179	273.4	191.6
1377	156.6	233.7	322.2		157.4	243.8	225.2		179	266	193.1
1378	156.9	228.3	308.1		156.7	245.6	226.2		176.2	264.2	187.7
1379	158.2	229.7	317.8		154.1	232.1	216.2		176.2	260.1	189.3
1380	158	229.6	308.6		156.1	244	218.4		177.8	264.9	190.4
1381	159.3	225.7	310.3		156	239.9	218.7		174.2	271.2	185.7
1382	158.4	230.2	314.2		156.6	245.7	217.7		173.8	261.8	191.9
1383	157.6	234.6	321.2		156.1	235.8	211.5		173.7	269	193.4
1384	158.9	224.4	312		157.6	231.7	210		172.2	263.6	198.5
1385	159.8	230.7	310.4		157.4	241.8	213.8		171.8	269.6	190.8
1386	158.4	227.8	310.7		154.5	234.6	206.1		170.7	269.2	194.2
1387	160	231	305.1		158.2	246	211		169.8	276.1	197.1
1388	159	228.7	308.9		155.8	242.7	207		169.4	269	198.8
1389	157.4	228.9	308.1		155.3	230.9	204.2		166	272.2	196.3
1390	159.4	224.2	303.7		155.9	237	210.6		167.7	264.5	198.2
1391	157.1	229.2	304.6		156.5	242.1	208.1		167.8	267.3	189.4
1392	158.8	227.5	303.4		156.4	243.4	211.7		167.3	264.4	197.5
1393	159.2	227.1	306.3		158.1	242.3	209.9		169	270.9	192.8
1394	157.8	234.9	288.4		155.3	240.9	208.9		166.7	259.9	184.8
1395	156.1	234.7	287		158	244.5	212.9		167.8	258.2	200.2
1396	160.6	227.5	296.6		157.5	239.4	212.3		168.9	262.5	201.8
1397	157.3	246.3	285.6		155.5	238.4	208		167.2	272.2	200.2
1398	161	234.5	297.5		155.7	238.6	209.9		167.2	264.2	196.2
1399	156.9	235.8	295.6		156.4	242	208.8		168.7	278.3	202.3
1400	157	243.2	284.6		154.4	234.4	210.7		169.2	280.5	192.6
1401	157.3	247.1	288		156.1	247.5	208.9		169.4	272.2	197.2
1402	159.5	225.4	289.6		152.8	244.6	211.4		170.4	273.4	200.2
1403	158.9	234.8	286.5		157.4	240.2	208.2		168.9	277	197.6
1404	157.6	229.2	282.6		154	246.1	207.9		170.2	274.6	194.4
1405	158	243.4	277.8		154.4	236	206.5		170.2	273.2	204.9
1406	155.6	227.1	279.9		155.7	241.2	213.1		169	271.8	194.4
1407	160.2	229.8	286.4		156.4	243.1	212.4		168.4	281.2	199.3
1408	155.7	232.8	277.9		154.6	239.2	212.4		170.3	271.2	195.3
1409	158.8	226.5	279.2		155.3	234.8	208.8		168.4	273.9	199.7
1410	157.3	226.9	283.7		155.9	240.8	211.9		167.9	273.9	202.2
1411	156.9	239.7	273.9		152.9	231.6	210		169.4	273.5	193.6
1412	158.6	234.2	271.6		154.7	246.9	210.6		167	269.8	200.1
1413	155.5	241.8	270.5		154.7	241.4	211.1		167.4	281.5	200.3
1414	154.2	244.6	270.1		153.7	242.1	210.2		168.7	272.5	194.3
1415	156.4	240.1	270.6		154.8	241.2	209.4		167.9	281.1	197.7
1416	156.1	241.4	274		153.6	245.2	213.9		167.6	277.2	196.1
1417	155.5	243.7	266.9		154.2	239.6	207.8		168.2	289.1	203.4
1418	154.9	246.6	268.6		155.3	233.3	210.6		164.7	268.5	198.8
1419	156.9	247.2	270.4		152.6	241.4	215		167.7	278	191.9
1420	155.4	234.7	265.8		153.5	238.5	210.5		167.9	272.7	196.9
1421	156.5	226.9	269.5		153.4	232.1	212.5		164.5	277.2	198.5
1422	155.4	223.8	263.1		154.7	247.4	210.4		166.1	272.3	195.5
1423	154.6	239.1	268		153.1	237	210.6		168.2	272.2	199.7
1424	156	238.4	271.6		153.3	238.1	212.8		168.3	274.8	197.8
1425	155.9	241.3	269.5		154.3	247.2	217.4		169.4	274.2	201.8
1426	152.8	237.9	274.9		154.9	248.2	218.6		167.5	271.8	199.2
1427	153.7	247.1	262.2		154.1	248.1	219.1		166.7	277.2	191.4
1428	154.1	239.5	266.4		156.7	247.6	211.8		166.8	270.1	199.4
1429	155.6	236.4	267		155.6	249	217.2		168.7	277.9	189.6
1430	153	238.8	262.5		154.1	254.1	216.2		169	271.3	196.8
1431	153.4	239.3	269.9		156.1	254.6	224.3		170.6	277.2	196.4
1432	156.5	239.3	269.8		158	253.2	221.8		169.9	269.8	196.7
1433	154.9	222.5	279.3		154.9	245.9	219.1		169.6	280.1	195.4
1434	155.7	232.9	276.9		154.1	247.4	224.6		170	286.2	195.5
1435	153.1	240.2	274.6		155.8	252.1	222		167.4	290.5	196.7
1436	151.7	241.9	263.9		155.1	243	215.6		172.5	278.7	198
1437	156.1	227.2	278.2		155	240.9	216.7		171.3	278.8	184.5
1438	155.8	245.2	272.1		155.5	248.4	224		171.3	284.3	190.3
1439	154.5	242.9	278.7		153.7	244.1	216.7		171	287.1	192.9
1440	153.4	237	268.4		154.8	247.6	224.5		169.5	295.2	193.4
1441	155	227.4	273.8		155.1	241.7	217.9		170.7	290.7	197.3
1442	154.5	247.8	279.6		155.4	242.4	219.9		170.5	290.1	196.8
1443	155.2	247.1	276.9		154	240.2	215.8		169.9	284.4	200
1444	154.9	240.6	283.6		154.4	234.9	218.4		172.9	289.2	190.8
1445	155.6	227.9	288.5		154.3	247.1	219.1		169.8	287.2	190.9
1446	155.1	229.6	283.6		156.2	242.4	215.4		170.3	286.9	194.3
1447	151.4	245.4	286.7		155.2	243.4	215.8		171.4	287.3	195.2
1448	154.3	231.4	283.4		152	237.9	212.4		171.3	288.4	191.8
1449	154.2	242.4	289.6		154.4	246.9	219.4		170.5	293.1	194.4
1450	153.9	228.6	296.1		152.4	241.6	217.9		175	285.8	188.4
1451	153.8	245.1	287.3		155.8	235.9	210.4		174.2	276.3	191.3
1452	153.1	247.4	295.4		156.3	240.2	215.8		173.7	281.1	193.6
1453	152.3	247	301.1		152.9	237.1	210.3		172	273.7	197.2
1454	152.7	240.4	289.2		154.9	239.8	209.7		173.6	284.4	188.9
1455	153.6	246.6	292.4		157.2	245.1	212.9		172.2	284	194.6
1456	153	246.2	300.9		156.2	244.6	211.6		173.4	278	190.7
1457	153.6	244.3	298.7		155.2	248.4	214.3		170.9	283.2	191.4
1458	156.2	247.4	290.8		152.4	237.5	208		172	285.2	194.3
1459	154.4	230.1	296.5		155.3	240.2	211.3		174.4	279.7	195.1
1460	155.6	225	304.9		155.5	240.1	207.4		170.4	281.8	189.8
1461	154.9	248	295.4		155.5	244.4	206.5		172.2	275.9	192
1462	154.4	236.1	294.2		154.6	245.9	211.4		171.5	281.5	195.3
1463	154.7	247.2	304.6		153.5	238.2	209.9		173.1	273.6	191.9
1464	156.2	248.4	293.6		153.2	239.6	205.2		171.2	281.6	194.6
1465	156.5	229.2	295.4		154.1	234.6	211		173.5	287.7	197.1
1466	156.8	251.9	293.8		153.5	238.2	208.5		173.4	282.7	192.3
1467	156.3	251.3	293.3		153.8	234.4	212.1		172.1	277.8	192.4
1468	152.5	246.1	289.7		154.8	243	211.7		172.6	279.8	193.2
1469	153.4	245.6	285.1		155.4	237.8	212.1		171	279.9	196.6
1470	153.4	250.6	295.8		153.8	238.1	209.1		171.2	283.3	188
1471	155.2	240	299.4		151.9	247.2	210.6		169.7	274.3	188.5
1472	154	234.8	291.9		154.5	236.4	209.1		170.5	281.4	192.8
1473	153.9	232.5	290.9		154.5	251.8	214.5		169.9	282	191.6
1474	158.1	233.3	287.6		155.8	243	207.4		170.3	279.2	192.5
1475	155.4	238.1	290.4		152.8	240.3	210.6		167.4	290	191.3
1476	156.2	231.2	300.7		155.2	237.8	209.5		166.9	273.8	185.1
1477	155.5	251.6	280.8		154.6	243.8	211.1		169	292.2	190.8
1478	156.3	255.1	289.4		154.3	235.8	211.6		167.7	273.8	184.8
1479	155	233.5	283.4		153.2	244.6	211.2		168	279.2	183.9
1480	153.2	259.7	282.4		153.6	245.4	213.8		166.3	273.5	191.9
1481	155.3	250.9	276.3		155.2	241.6	203.8		168.2	287.3	197.8
1482	155.4	256.2	280.6		154.5	240.4	206.1		166.4	287.6	190.8
1483	157.3	231	288		156.4	242.9	204.9		169.5	279.8	193.4
1484	159.6	233.6	292.1		153.2	239.9	200.3		168.6	273	188.1
1485	154.7	254.8	273.1		151.8	237.1	201.8		166.7	274.4	187.8
1486	154.3	258.6	281.9		152	240.6	204.9		167.7	273.6	191.8
1487	158	235.6	288.3		153.6	238.9	201.5		165.8	279.1	188.4
1488	154.6	234.6	287.8		153.3	242.2	195.7		169.3	283	183.4
1489	157	246.6	280.5		152.9	240.2	204.1		168.6	269.1	189.9
1490	153.8	250.2	287.1		153	235.2	200.7		170.4	280.6	192.7
1491	157.6	246.5	281.7		156.1	240.4	204.7		167.7	280.1	189.5
1492	157.2	231.8	287.1		154.9	240.6	206.7		167	282.7	184.3
1493	157.3	235.4	278.2		152.7	239.4	199.8		166	280.5	191.1
1494	153.1	250.4	282.1		155.2	241.6	206.4		167.9	276.2	187.1
1495	155.6	223.9	293.2		154.2	241.3	203.9		165.4	282.8	189.1
1496	156.4	225.2	280.5		154.1	234.1	203.3		169	278.8	187.2
1497	156	230.3	285.4		153.7	233.1	202.8		168.6	274.9	192.1
1498	154.3	249.3	286.6		153.1	235	204.4		169.2	288.2	188
1499	155.4	241.5	281.1		152.7	239.4	201.9		170.9	275.8	194.9
1500	154.1	225.8	280.6		154.2	238.3	202.9		173.6	281.1	193.2
1501	155.9	226.2	295.4		154.6	232.6	204.3		176.4	286.9	187.1
1502	153.8	226.3	287.8		155.6	236.5	213.2		171.6	288.7	199
1503	155.7	225.2	291.2		154.8	236.9	207.7		174.6	280.5	190.2
1504	154	238.2	286.1		153.2	232.4	207.6		169.8	284.8	187.6
1505	155.7	229.1	288.1		154.6	237.1	210.4		171.6	278.8	191.7
1506	155.4	227.6	280.8		154.5	231.6	212.7		170.4	275.2	185.1
1507	151.9	243.1	279.9		154.8	238.1	210.8		168.3	278.2	191.2
1508	154.8	226.4	277.6		153.6	229.4	213		169.9	278.7	195.4
1509	152.4	239.2	276.5		153.5	232	215.1		167.5	285.3	191.5
1510	157.1	233.7	275.8		152.8	233.6	214.5		168.1	278.9	186.3
1511	155.3	228.4	278.3		154.7	234.5	215.6		169.2	279.4	186.3
1512	157.8	224.9	279.4		153.6	229.1	215.5		169.1	278.9	190.8
1513	155.5	238.1	272.1		153.2	236.1	215.9		166.8	284.6	195.5
1514	155.3	237.4	264		154.2	228	220.4		168.6	289	188.8
1515	156.2	243.6	269.9		152.9	233.6	216.7		167.6	274.4	194.3
1516	157.3	239	270.8		153.7	228.1	218.4		166.7	277.1	188.7
1517	157.6	229.8	274.2		153.3	227.5	217.6		165.4	282.8	193.9
1518	154.2	243.2	260.4		154.4	231.1	216.5		166.4	277.8	187.3
1519	155.9	227.3	274.9		154	230.8	221.7		170.3	278.9	184.7
1520	152.7	225.1	269.2		152.7	234.6	222.1		169.3	280	192.4
1521	154.8	226.1	262.4		155	234.4	223.9		168.4	280.5	191.9
1522	155.8	224.8	263.8		154.1	236.4	225.9		174.2	284.2	191.5
1523	153.9	227.6	269		154.1	236.1	225.1		173.9	276.8	190.5
1524	154.4	225.7	266.3		155.6	233.8	231.6		172.5	291.4	192.6
1525	154.8	226.7	262.9		155.4	239	227.4		173.3	275.8	184.8
1526	155.7	238.7	258.8		152	230.1	227.8		171.1	279.2	185.5
1527	154.7	240	255.6		155.1	232.2	226.9		169.4	278.8	189.8
1528	154.8	227.4	262.1		154	233.3	229.9		171.1	272.5	187.5
1529	154.7	225.6	262.1		153.8	229.9	232.9		170.2	274.2	191
1530	157.6	226.4	253.3		154.6	235.2	237.9		170.3	268.9	184.6
1531	155	221.8	258.2		155	236.8	243.3		167.3	275.8	193
1532	155.2	229.1	250.1		154.3	234.5	235.3		167.3	275.8	196.4
1533	156.7	219.4	250.4		153	233.7	236.6		167.1	271.5	187.5
1534	155.2	222.2	254.1		152.3	235.7	238.6		166	268.5	189.8
1535	155.6	223	254.9		154.3	236.1	240.2		166.9	272.9	197.2
1536	153.3	224.2	252.8		154.1	234.8	234.6		165	278.6	190.6
1537	155.8	222.6	257.3		155.4	237.1	236.1		166.6	267.3	188.3
1538	155.9	221.9	255.9		154.7	237.1	236.1		168.4	277.1	187.2
1539	155.7	218.4	261.9		155.7	231.8	241.3		166.4	281.8	188.1
1540	154.6	225.7	258.2		153.8	232	237.9		166.4	278.2	190.9
1541	156.4	228	248.8		153.9	237.5	235.5		165.7	281.2	189.2
1542	155.2	226.1	257.6		151.8	240.4	242.3		167	276.6	189.7
1543	154.3	243.6	256.4		152.9	236.5	242.4		164.4	280	190.7
1544	154.8	238.1	256.9		154.4	239.2	236		166	278	194.4
1545	154.6	229	257.8		151.9	239.9	237.7		164	270.9	195
1546	153.5	224.6	261.1		153.4	239.9	238.3		166.1	283.8	190.1
1547	153.9	243.6	267.2		154.3	236.1	232.8		165.3	271	198
1548	153.8	222.2	276.8		154	236.9	233.7		166.3	277.8	197.5
1549	155.9	223.2	268.4		153.8	238.1	239.7		164	272.2	200.6
1550	156.6	229.2	273.2		156.9	235.6	239.1		166.6	276.1	197.6
1551	157.1	225.1	283.6		154.7	232	238.2		164.8	275.7	195.9
1552	156.4	223.6	281.8		153.2	236.9	234.5		165.2	276.9	204.2
1553	156	223.4	285.2		154.8	234.6	240		168.6	276.8	195.2
1554	155.2	235.5	274.8		154	237.3	237.3		166.2	281.6	202.5
1555	155.4	239.6	279.1		153.4	228.9	239.5		164.5	272.8	194.6
1556	152.5	242.9	290.6		155.7	237.6	241.1		166.6	276.9	197.8
1557	155.8	224.6	287.1		155.2	234.8	240.3		165.9	274.2	199.8
1558	153.4	237.6	288.8		155	234.6	242.3		166.6	279.5	201.2
1559	154.8	238.9	290.5		153.4	232.4	237.7		168.1	268.4	206.4
1560	155.9	221.2	297		156.5	238.1	238.7		167.3	270.7	204.1
1561	154.4	229.9	301.8		155.2	232.2	238.4		164.4	276	191.4
1562	154.8	244.6	295.8		152.7	227.3	237.7		166.3	287.6	199.7
1563	154.1	236.8	296.1		154.2	229.4	237.5		168	275.4	199.1
1564	153.8	242.9	297.7		153.2	238.7	240.9		166.8	273.2	203.2
1565	153.9	242.9	305.5		153.3	232.9	240.1		167.7	265.4	194.9
1566	151.4	243.4	297.5		153.6	230.1	243		166.9	275.3	196.3
1567	154.5	229.2	307.2		154.2	227.8	243.8		166.1	280.2	199.6
1568	154.2	243.8	293.2		154.2	229.9	236		167.1	272.8	195.1
1569	153.5	238.1	288		154.9	233	238.3		164.6	273.2	202.3
1570	152.8	238.8	300		157.7	234.6	232.8		165	269.8	198.2
1571	155	238.8	299.4		155.5	233.9	235.4		165.5	277.9	202.4
1572	153.5	247.6	298.2		154.8	234.4	231.6		165.7	275.6	196.8
1573	152.8	235.2	301.9		155.2	236.6	234.2		165.1	265.2	202.5
1574	153.8	246.2	302		156.7	235.6	228.7		167.8	272.2	201.8
1575	153.4	243.1	304.4		157.5	234.1	235		167	269.7	199.9
1576	153.8	245.5	307.1		154.7	234.2	232.6		166.7	280.8	201.8
1577	153	239.9	301.4		156.1	236.7	229.3		167.2	278.4	199.8
1578	153.2	243.8	299.6		155.7	238.2	231.8		166.6	276.9	197.2
1579	155	246.4	303.8		155	233.6	228.7		167.3	263.6	200.2
1580	152.5	249.6	311.4		154.1	237.7	231.5		170	269.7	200.1
1581	153.9	244.8	310.6		157.4	232.4	230.4		165.2	277.3	197.3
1582	154.3	254.8	302.9		153.7	232.8	226.1		164.2	272.2	199.1
1583	153.7	243.9	307.4		155.7	235.4	231.1		165.8	274.6	197
1584	155.6	240.6	304.6		154.1	234.7	229		165.9	267.5	194.7
1585	150.5	239.4	303.9		153.3	237.8	233.1		166.8	277	192.2
1586	154.7	243.3	309.4		153.1	232.3	229.6		166	272.8	195.2
1587	155.3	240.9	305.8		154.4	237.9	232.1		166	274.6	195.6
1588	155.1	238.1	304.8		152.7	236.1	230.5		165.8	274.9	194.2
1589	155.7	245.1	311.1		153.9	239.7	226.8		164.9	273.8	192.8
1590	155.5	242.1	311.5		151.4	236.6	225.9		165.1	275.3	193.4
1591	155.8	242.5	310.2		153.3	239.4	229.6		166.7	278.3	197.4
1592	154.7	238.9	308.2		152.3	230.7	228.3		165.4	271.6	192.3
1593	154	243.8	316.7		153.4	242.1	222.1		165	271	191.6
1594	152.8	238.2	314.1		152.3	238.1	230.9		165	263.8	186
1595	154.6	239.7	313.3		152.2	231	229.9		164.2	274.3	195.4
1596	154.2	241.6	311.1		150.8	231.2	229.4		164.3	270.8	190.7
1597	154.2	237.5	309.6		153.4	238.4	227.2		166	270.1	185.5
1598	155	242.6	320		152.5	235.4	229		165.2	275	189.5
1599	154.5	242.4	315.9		153.5	232.8	231.3		166.8	269.2	193.9
1600	154.1	240.4	319.4		153.6	235.9	226.6		165.9	269.8	195.6
1601	155.4	242.9	326.5		153.1	231.8	229.1		163.5	273.4	183.8
1602	153.7	237.1	327.6		152.9	235.7	222.9		166	267.5	185.2
1603	154.3	239.7	320.4		155.4	231.6	224.9		165.5	278.8	189.2
1604	152.5	241.5	326.6		153.5	233.4	222.3		163.4	274.8	186.3
1605	152.5	240.7	325.3		153.5	237.4	224.7		165.4	265.8	187.8
1606	153.3	239.1	321.6		153.4	233.9	225.1		164.8	265.8	185.4
1607	153.7	239.4	326.1		151.6	229.9	222.1		165.9	257.7	186.3
1608	152.3	249.7	330.7		152.3	230.4	223.8		167	262.4	188.1
1609	152.8	244	324.2		150.6	231	222.4		166.6	268	188.4
1610	152.5	236.7	316.9		151	240.4	212.5		165	268.8	189.4
1611	153.3	243.1	335.9		151.7	233.7	214.8		165.6	264.9	184.8
1612	154	240.6	331.2		153	241.2	211.9		164.2	260.5	185.2
1613	152.8	242.4	334.6		154.4	237.4	217.2		162.9	271.7	186.3
1614	151.7	242.6	330.8		151.3	238.8	216		164.2	261.9	186.1
1615	155.2	245.2	336.4		152.7	233.9	216.9		164.6	269.4	184.9
1616	151.7	236.9	340.1		151.8	239.1	211.7		165.9	268.9	188.2
1617	155.3	232.9	336.3		153.6	244.9	215.6		165.8	265.1	182.5
1618	154.3	241.9	331.6		155	236.9	213		164.8	270.9	186.2
1619	157.1	244.1	336.1		153.9	243.4	216.1		164.3	271.3	187.7
1620	153.4	238.9	342		153.3	238.5	211.6		167.3	266.6	179.2
1621	153.1	239	340.1		153.4	242.9	217.4		164.1	265.4	191.6
1622	152.9	243.6	347.9		153.4	242.8	220.1		165.4	266.8	192.2
1623	156.9	244.9	341.3		154.9	242.1	216.6		165.1	262.2	183.1
1624	154.5	243.6	349.5		155.1	235.8	222.8		165.1	263.4	189.5
1625	152.9	244.2	340.3		153.8	242.6	218.4		164.9	261.5	183.6
1626	154.6	246.2	344.8		153.9	235.5	218.9		166.1	262.4	183.3
1627	154.2	238.7	342.6		153.8	242	221.3		163.2	264.7	183.3
1628	152.9	240.1	344.6		154.5	244.2	221.6		166.8	271.1	188.5
1629	155.1	241.9	345.8		153.9	245.6	224.4		165.4	253.2	178.8
1630	156.4	239.2	348.5		153.6	241.5	222.1		166	259.8	180
1631	152.5	236.4	342		155.3	242.9	226.7		163	262.8	182.4
1632	153.6	243.7	352.1		155.4	245.9	227.4		166.3	266.5	182.4
1633	154.6	243.2	346		155.9	247.6	232.1		164.3	265.6	187.1
1634	155.2	242.6	342.4		155.5	245.6	224.7		166.2	268.2	178.6
1635	156.1	245.9	346		154.9	240.3	225.5		165.1	266	183.6
1636	158.9	242.6	341.6		153.1	242	221.7		165.5	261.2	188
1637	155.3	244.9	356		153.4	238.8	222.2		166.3	261.2	186.7
1638	153.3	247.1	358.2		154.8	245.8	221.9		166.4	260.5	176
1639	156.1	250.6	353.3		154.9	241.9	221.2		167	252.1	181
1640	156.5	247.8	351.4		153.6	242.4	218.7		164.8	259.2	190.2
1641	157.3	244.3	351.8		152.5	239.8	223.3		163.6	262	192.1
1642	156.6	244.5	353.9		152.6	233.2	214.7		165.8	265	187.7
1643	156.1	242.8	356.6		153.3	248.9	214.3		166.9	258.1	183.1
1644	159.4	243.9	359.8		152.9	235	209.6		164.7	265.6	186.6
1645	158	248.1	359.2		155.3	250.2	213.7		164.5	259.7	182.1
1646	155.3	245.8	353.4		153.6	244.5	212.1		167.3	256.7	178.1
1647	158	244.2	358.1		153.4	245.7	215.9		165.8	261.7	187
1648	157.5	249.3	357.4		152.8	247.1	212.4		163.6	259.8	179.9
1649	154.1	237.9	359.4		154.6	250.6	209		165.9	256	183.2
1650	155.3	238.1	357.3		150.9	248.2	209.8		163.6	260.4	189.9
1651	156.9	246.6	361.6		151.9	252.9	208.6		166.1	260.9	180.9
1652	156.9	238.8	360.8		153.3	248.3	209.2		164.8	256.6	178.7
1653	157.3	243	355.1		155.7	255.2	207.1		165.3	260.9	185.5
1654	156.6	241.1	352.9		151.7	253.6	205.8		163.3	259.6	190.7
1655	156	237.1	346		154.7	258.7	208.7		164.2	263.4	184.8
1656	157.6	241.8	351.9		151.4	258	206.4		165.2	265.2	182.8
1657	156.7	239.2	352.6		153.3	265.2	207		165.6	262.7	180.8
1658	156.2	240.2	352.5		151.4	257.6	209.3		164.2	269.7	188.2
1659	157.6	237.9	355.4		152.6	259.2	208.4		163.7	264.7	177.2
1660	155.8	240	350.7		153.7	263.8	207.4		165	262.2	180.4
1661	156.4	242.6	345.2		151.4	265.8	206.7		165.4	264.1	182.8
1662	157.7	249.8	346.5		154.2	259	207.1		164.4	261	189.7
1663	157.9	236.7	343.6		150.7	266.3	200.2		163.6	268.1	178.5
1664	156.5	242.8	346.4		154	268.9	203.2		162.6	270.7	190.4
1665	158.3	243.1	341.2		156.5	268.6	204.5		163.4	260.4	179.1
1666	156.9	243.9	347.4		153	263.5	205.9		163.5	261.8	177.3
1667	155.6	239.9	341.3		152.8	264.1	203.9		165.5	261.8	192.8
1668	154.9	236	340.2		155.9	259.7	200.5		165.7	263.3	178.3
1669	155	242.5	340.7		153.6	264.4	202.1		165	265.9	187.5
1670	157.4	244.2	342.3		155.5	264.5	201.8		165.1	270.2	181.8
1671	158.9	249.4	341.4		155.2	263.4	206.8		165.1	269.5	181.7
1672	158	242.7	339.1		153.9	260.9	198.5		165.3	259.8	187.8
1673	157.2	239.6	339.6		155.2	261.1	201.6		165.6	274.6	186.6
1674	157	245.4	329.3		153.1	261.7	197.9		165	267.7	184.5
1675	157.6	236.7	334.4		155.3	263.6	197.6		163.8	264.5	183.8
1676	157.2	241.4	328.8		154	262.8	195.6		163.8	260.8	188.2
1677	157.4	234.8	323.4		152.9	260.2	202.8		163.9	268.4	179.1
1678	153.6	242.2	325.1		154.8	265.5	203.1		164.5	261.7	186.2
1679	155.9	242.7	320.2		153.9	259.1	204.8		163.8	272.9	183
1680	155.4	243.5	319.1		153.3	259.6	199.5		164.5	275.4	184.7
1681	155.5	234.1	314.9		153.7	260.9	203.2		165.7	264.2	180.8
1682	154.7	241	319.6		153.6	259.4	203.1		164.5	261.3	178.3
1683	158.5	238.7	318.2		153.2	257	203.7		164.6	257.6	182.8
1684	157.3	242.5	315.9		154.6	253.5	207.1		164.7	259.8	180.4
1685	155.9	249.4	312.7		151.8	255	205.7		164.9	269.4	186.2
1686	157.3	243.8	310.4		154.9	258.6	210.1		165	256.2	174.7
1687	158.3	246.2	302.1		154.7	263.8	210.5		162.5	261.8	179.3
1688	156.6	250.2	308.6		154.6	252.6	211.5		165.7	276.3	188.5
1689	158.9	242.5	312.9		152.3	253.8	211.9		165.4	273.8	186.1
1690	158.2	243.8	315		152.4	253.9	219.2		165.3	281	184.6
1691	157.7	252.7	312.6		154.6	251.9	217.8		165.1	277.9	188.8
1692	156.4	253.3	307.3		154	254.7	220.3		167.5	281.4	182.7
1693	158.3	252.4	311.8		153.6	252.4	218.9		166.6	279.1	189.1
1694	156.3	252.7	312.5		153	250.1	221.6		166.3	274.9	185.6
1695	159.5	248.5	313.3		151.4	259.1	221.6		164.7	281.8	187.9
1696	156.4	252.2	316.6		151.9	248.1	227		166.9	275.2	185.7
1697	156.4	252.4	315.2		153.2	252.4	226		167.7	287.2	190.8
1698	158	249.4	314.8		156.1	254.6	227.4		167.2	288.3	188.9
1699	158	259	312		154	248.7	230.4		166.6	283.5	185.7
1700	157.9	250.9	305.9		152	248.8	228.2		167.2	286.5	186.9
1701	158.8	255.2	312.4		153.5	250.7	228.4		166.2	288.8	183.4
1702	159.2	255.3	311.5		152.1	254.1	232.4		168	274.8	179.2
1703	158	250.7	307.5		153.9	248.2	236.2		167.4	282.7	186.8
1704	159.4	259.1	313.2		151.2	251.7	234.4		167	276.2	187.4
1705	155.7	264.6	304.2		155.8	248.6	238.6		165.2	277.8	182.7
1706	157.7	254.3	310.1		152.7	251.6	239.1		167.1	279.2	188.1
1707	159.2	252.2	318.2		154.7	243.6	242.8		168.1	283.2	194
1708	159.4	252.4	311.5		154.8	242.7	237.4		167	277.6	187.2
1709	160	255.1	318.5		155.6	247.1	240		168.3	279.7	189.7
1710	157.5	256.2	323.6		154.7	248.2	243.8		164.7	277.3	182.2
1711	160.5	253.6	319.5		154.4	248.7	242.4		168.2	273.9	186.5
1712	160.5	257.1	330.2		154.2	246.3	247.5		168.1	275.2	185.1
1713	160.3	246.8	325.7		155.7	245.2	247.2		165.6	284.1	186.1
1714	159.8	251	316		154.9	246.8	248.3		166	274.2	185.7
1715	159.3	257.7	323.6		153.3	245.9	242.9		167.8	270.8	175.4
1716	158.3	251.2	321.8		154.9	243.9	243.3		167.1	278.9	186.8
1717	159.5	251.3	326.1		155.1	235.9	243.1		168	283.8	183.2
1718	159.2	249.4	324.7		155.6	242.4	249		165.7	274.1	187.4
1719	159.5	249.2	325.5		154.2	240.2	245.2		167.5	273.3	186.7
1720	156.7	248.8	321.2		154.8	241.4	247.5		167.2	271.2	187.7
1721	158.7	247.9	321.2		154	239.1	242.7		168.7	274.7	179.9
1722	158.4	245.4	320.2		154.8	236.6	243.4		165.3	275.8	177.2
1723	159.5	241.3	318.2		154.1	242.2	244.6		167.4	277.9	181.3
1724	158.4	242.5	321		154.3	238.1	241.3		165.6	279.3	187.2
1725	161	245.9	319.5		155.9	241.4	244.1		165	276.9	180.6
1726	161.4	245.4	318.6		153.2	236.9	245.6		165.5	282.9	186.4
1727	159	252.8	320.3		152.3	237.8	241.3		165.4	271.3	180.9
1728	157	247.4	320.2		156.8	238.9	243.9		167.2	275.7	187.4
1729	159.7	242.4	323.8		152.9	239.6	239.1		167.5	279.9	181.4
1730	159.6	244.7	329.4		153.6	234	243.6		166	291.5	184.6
1731	160.7	246.8	332.9		152.4	238.1	241.5		166.3	273.3	182.6
1732	159	244	336.3		152.3	231.9	242.4		165.5	282.5	181.7
1733	158.4	246.4	330.7		153.4	229.8	236.8		165	285.5	186.4
1734	159.7	246.4	326.4		154.1	237.1	233.1		166.1	272.9	185.4
1735	161.8	244.2	325.6		153.8	239.6	235.7		166.3	283	184.3
1736	160.8	248.8	327.8		152	233.2	241.1		165.4	271.7	177.6
1737	157.1	248.3	329.7		154.5	235.4	239.8		165.7	285.2	179.9
1738	159.6	245	321.4		152.9	238.9	240		166.5	278.4	181.2
1739	158.6	240.3	322.6		152.5	235.6	237.7		165.8	277.8	180.2
1740	159	236.8	328.2		154.2	242.2	242		165.9	280.4	178.4
1741	159.7	244.1	334.5		154.4	227.5	239.9		163.5	280.4	177.8
1742	159.4	244.6	329.3		154.4	228	232.9		165.1	277.2	182
1743	158.3	236.6	311.7		153.7	225	232.7		165.8	277.9	177.7
1744	160.8	243.6	319.9		152.7	231.2	235.1		164.8	272.1	180.2
1745	159.4	237.7	324.9		153.5	229.6	235.1		163.1	272.8	186.2
1746	157.8	247.8	332.1		153.5	230.4	233.1		164.3	270.8	180.7
1747	159	242.1	325.9		156.2	226.9	230.5		163.9	273.8	181.2
1748	158.7	240.5	318.8		152.3	223.8	230		165.5	271.9	181.7
1749	156.8	245.7	323.4		154.3	223.4	233.7		164.1	285.2	185.2
1750	158.7	240.8	325.9		152.5	231.5	232.7		164.1	278.2	191.7
1751	158.7	235.4	324.6		153.1	221.5	232.4		164.8	273.5	181.2
1752	158.4	238.1	321.1		153.8	229.1	230.7		162.9	278.3	178.4
1753	157.3	242	318.7		152.1	226.3	230.9		164.7	275.5	181.1
1754	158.2	236.9	322.2		152.5	227.1	231.7		164.8	277	183.8
1755	157.8	239.2	325		152.2	226.6	224.4		165.8	277.6	181.8
1756	157.7	244	320.8		153.3	222.6	227.4		165.6	275.9	182.1
1757	157.7	237.5	316.1		152.5	225.9	226.8		165.1	276.7	183.1
1758	160.2	245.9	321.2		154	223.4	222.7		166.3	279.5	180
1759	159.1	243.6	328.6		152.6	223.6	228.5		164.2	271.2	181.5
1760	158.6	242.8	320.8		154.2	222.2	226.4		164.7	280.3	188.8
1761	159.3	240.4	323.9		153.7	226.1	223		166	279.7	189.1
1762	156.6	243.7	327.1		151.5	222.7	220.4		165.2	277.2	181.5
1763	158	243.6	326.4		153.6	219.6	215.8		165.5	273.8	181.3
1764	156.1	239.7	332.2		151.7	229.1	216.7		167.2	280.6	188.4
1765	156.2	242.1	322.6		151.3	220.2	217.8		168	278.8	181.7
1766	156.2	250.2	329.4		151.6	223.9	217.5		167.8	276	181.2
1767	158.2	242	336.4		153.2	225	220.7		165.5	266.7	187.7
1768	160.4	248.8	329.8		151.1	223.7	206.3		167.7	266.3	179.6
1769	158.7	244.2	327.4		151.9	217.6	210.3		166.4	278.9	189
1770	159.5	243.7	343.1		152.9	216.4	209.9		166.8	280.9	184.8
1771	155.1	245.7	325.1		151.2	220.2	207		169.3	273.2	179.8
1772	156.4	252.2	342		153.1	219.1	206.1		166.5	274	185.5
1773	156	247.4	327.9		152.3	222.6	207.8		167.6	266.2	187.4
1774	158.7	237.6	329.7		152.9	221.9	209.5		167	276.2	180.2
1775	154.6	249.6	330.4		152.4	219.2	202.6		168.2	273.2	186.6
1776	157.9	246.7	332.9		153.9	225.6	203.3		167.4	283	184.4
1777	158.2	247.3	333.9		152.1	223.6	198.5		167.2	282.8	187.5
1778	158.2	244.9	334.1		151.4	229.4	201.8		167.3	271.8	180.8
1779	157.7	250.8	338.9		152.4	220.6	197.8		168.1	284.3	182.1
1780	155.6	242.5	325.4		151.2	220.9	202.5		165.8	284.2	188
1781	158.3	238.6	333.7		153	225.8	202		166.4	283.2	188.4
1782	155.6	243.4	328.1		151.4	218.8	194.6		167.8	283.2	186.4
1783	158.3	239.9	327.4		151.9	218.2	198.6		166.5	280.8	184.4
1784	156.4	243.1	332.4		152.5	223.2	197.2		166.9	287.6	188.8
1785	158.2	248.2	331.4		151.4	217.1	198.4		168.5	280.7	184.4
1786	155.1	235.4	319.8		152.2	221.6	196.9		168.2	282.2	185.8
1787	156.1	241.6	328.4		154.2	215.9	200.9		168	291.6	187.9
1788	156.4	243.4	320.4		152.6	222.1	196.5		168.6	283.7	187.2
1789	157	241.8	324.2		153.1	219.6	200		166.6	284.1	180.2
1790	156.7	241.9	313.9		151.4	218.8	193.6		168.7	288.5	188.5
1791	157.3	239.6	316.9		153.4	226.1	199.4		167.1	288	188.3
1792	158.3	243.3	328.4		150.3	220.9	195.4		166.8	281.8	181.9
1793	156.2	245.2	321.2		152.6	222.9	202.2		167.7	286.2	182.2
1794	155	250	318.4		150.5	219.6	197.1		166.3	285.8	184.2
1795	156.5	237.8	316.4		151.2	221.1	195.9		166.5	293	185.2
1796	156.7	241.1	310		154.5	223.2	194.1		168	291.3	185.3
1797	153.3	244.2	324.9		152.7	223.4	204.3		167	288.2	191.2
1798	157.1	250.2	320.6		151.5	220.9	195.5		166.5	289.6	186
1799	156.7	243.5	316		151.5	223.4	201		168.2	291.5	186.3
1800	155.4	249.8	311.4		156.4	221.4	206.7		168.3	285.3	185.7
1801	158	237.9	321.8		152.8	222.1	201.8		169	280.5	179.2
1802	160	242.6	312.2		152.8	221.8	200.4		165.7	289.2	178.8
1803	156.3	241.4	311.2		153.9	222.9	204.3		167.5	289	181.7
1804	156.2	245.9	315.9		151.7	222.4	201.9		165.7	281.2	182.2
1805	156.2	241.4	311.8		153	216.6	203.7		167.7	283.4	181.6
1806	156.3	245.1	307.3		152.1	215.9	207.1		167	277.8	182.2
1807	155.7	238.1	306.3		154.7	218.7	206.5		169.5	289.2	188.2
1808	153.8	242.6	307.2		154.5	220.9	206.2		166.9	277.9	177.6
1809	155.3	239.2	314.4		150.5	218.9	211.1		168.4	284.1	187
1810	156.3	241.7	312.4		152.1	220.1	209		169.3	278.7	187.1
1811	156.5	246.7	302.4		151	223.7	210.7		169.2	278.2	182.4
1812	157.8	234.8	300.6		153.2	220.2	215.9		169.3	287.9	180.7
1813	155.4	239.2	302.5		155.8	226.3	221.5		168	282.7	186.7
1814	154.6	237.6	310.6		151.7	223.8	217.7		166.7	285.5	181.1
1815	154.9	240.4	301.8		152.1	221.8	223.1		168.7	285.3	186.9
1816	156.3	236.1	304.4		152.5	217.2	221		170	281.2	181.2
1817	155	235.2	298.9		152.6	226.8	225.6		171	281	180.2
1818	157	240.6	302.9		154.3	220	231.8		168	278.4	188.9
1819	157.9	235.9	300.6		153	223	233.8		167.2	280.2	184.1
1820	154.8	244.2	294.3		153.1	221.4	231.9		169.2	280.4	180.9
1821	155.3	233.4	292.9		152.8	221.5	231.3		168.9	286.8	186.7
1822	155	240.2	308.2		151.6	219	237.5		167.5	283.3	183.8
1823	156.7	242.1	307.9		155	222.9	233.4		167.1	278.4	184.7
1824	154	244.2	306.8		153.7	216.4	232.9		169.3	286	186.3
1825	156.3	240.9	308.4		153.1	228.4	237.9		168.1	275.2	189.8
1826	155.8	245.6	308.9		152.5	221.1	230.9		168.2	277.1	186.2
1827	154.7	249.4	308.4		152.5	218.2	235.7		167.7	275.8	186.5
1828	154.6	244.5	303.6		153.8	221.8	229.9		167	277.5	180
1829	156.6	242.6	319.2		151.5	218.8	227.2		166	283.2	190
1830	155	240.8	312.2		151.9	221.8	222.8		169.6	277.6	184.8
1831	154	246.4	306.5		153.9	221.5	224		167.5	270	186.8
1832	156.4	244.7	310.4		154.4	224.4	225.9		164.9	272.4	186.8
1833	155.1	247.2	316.4		152.7	221.4	221.7		167	281	186.3
1834	156.6	248.1	316.8		152	221.2	221.1		167.5	273.8	187.2
1835	155.9	251	321.4		152.4	220.1	217.4		167.3	277.4	190.2
1836	155.2	243.6	313.1		154.2	221.4	217.9		169.7	276	187.1
1837	155.9	247	320.2		153.4	220.6	217.5		165.4	273.1	182.5
1838	155.7	245.5	319.4		152.7	221.9	210.8		167.4	283	188
1839	155.4	250.1	326.6		152.3	222.9	214.1		166.7	281.5	191.2
1840	153.4	240.6	326.2		151.6	220.9	209.2		165.8	280.1	187.3
1841	154.2	248.4	325.1		153.3	220.8	207.8		166.2	272.5	184.1
1842	155.8	237.8	329.8		152.4	220.2	205.4		166.1	267.1	188.4
1843	154.5	243.2	327.3		151.8	225.1	206.9		168.1	262.8	185
1844	154.6	244.1	334.1		154.4	223.1	203.9		164.6	279.1	185.4
1845	154.6	248.9	326.4		155.7	227.4	207.6		166	267.8	188.2
1846	153.8	244.8	325.4		149.5	217.4	202.8		165.4	272.2	188.7
1847	155.9	239.4	318.7		149.7	219.1	200.9		164.8	268.1	184.2
1848	154.5	229.8	327.9		153.7	220.4	200.1		166.8	270.2	190.2
1849	156.4	244.1	327.2		152.3	221.6	199		163.4	259.8	185.2
1850	153.5	242.3	320.1		153.8	217.2	199.1		167.4	267	190.1
1851	154.4	245.9	312.7		152	223.2	197.8		166.5	267.3	187.8
1852	154.3	244.1	322.1		150.1	223.1	200.4		164	257.3	181.1
1853	154.2	243.7	325.2		150.8	221.4	198		165.3	267.7	186.1
1854	153	238.6	312.8		152.4	223.4	198.2		163.3	271.2	179.8
1855	155.2	249.2	313.2		151.9	228.8	200.4		167.2	268.2	185.6
1856	155	239.9	316.9		150.8	219.1	200.7		165.4	274.7	189.7
1857	153.4	240.2	304.4		151.9	221.3	201.3		164.6	259.5	187
1858	154.9	252.6	309.9		149.9	225.9	199.2		165.7	271.2	189.4
1859	154	244.7	318.6		153.6	224.4	199.1		164.9	271.8	183.4
1860	156.3	237.8	316.8		150.3	217.8	195.3		166.3	261	185.4
1861	155.7	240.1	308.4		154.7	218.9	198		165.4	266.3	184.8
1862	154.9	246.6	312.5		152.6	224	198.4		165.7	272.1	185.2
1863	153.3	245.8	303.1		152	219.8	198.2		164.2	265.8	188.7
1864	153.8	250.4	313.1		153.8	222.2	199.9		166.6	274.9	183.9
1865	155.3	250.2	309		151.7	217.2	198.3		167.9	268.9	185.9
1866	153.8	248.5	299.1		152.8	223.1	201.4		167.8	270.5	179.8
1867	153.6	251.8	297.1		152.3	218.1	202.6		167.2	281.6	183.2
1868	155.1	244.4	299.4		152.4	224.3	199		166.7	279.9	185.6
1869	156.9	248.4	302.2		152.4	227.2	209.9		167.1	274.1	189.4
1870	154.4	240.8	294.3		152.3	226.8	204.9		167.1	269.8	181.4
1871	155.9	244.9	300.4		153.8	223.8	203.2		167.3	273.2	179
1872	153.8	239.3	294.8		151.8	217.9	201.9		167.5	280.7	187.9
1873	156.6	241.7	301.9		155	226.5	204.7		165.6	278.1	181.3
1874	155.1	241.6	294		151.9	222.1	203.6		168.8	273.8	181.7
1875	156.5	240.4	306.1		153.6	215.7	204.6		167.3	275.4	181.8
1876	155.2	243.9	304.2		153	226.7	201.4		168.3	274.9	185.2
1877	154.3	249.1	293.6		153.4	222.1	204.1		167.7	274	186.2
1878	155.6	241.5	297.8		153.6	219.6	202.6		168.1	269.6	186.2
1879	153.9	248.2	300.2		152.5	225.7	203.7		167.7	265.8	182.8
1880	153.9	241.7	302.4		152.1	225.6	205.6		167.7	270.5	175.6
1881	154.6	245.9	304		152.3	225.2	202.4		168.9	274.3	180.7
1882	154.3	246.7	305.6		151.6	224.8	207.4		169.3	271.5	180.8
1883	156.6	253.1	294.3		151.9	222.7	208.4		168.9	267.8	190.8
1884	154.9	247.6	296.9		154.1	221.9	205.4		168	276.9	183.8
1885	156.7	247.4	299.8		153.3	227.8	209.5		167.3	279.1	183.2
1886	155.1	252.2	295.2		153.3	225.4	209.4		168	274	183.2
1887	154.8	247.1	297.8		154.2	226.4	210.9		169.9	278	181
1888	155.1	249.8	292.1		156	222.5	208.8		168.1	279.8	184
1889	155.5	251.8	289.3		154.3	229.9	213.1		169	277.7	192.8
1890	155	249.2	291		153	225.1	214.3		168.1	279.4	180.6
1891	156.1	246.4	293.6		155	229	217.1		167.4	278.5	178.7
1892	154.3	244.2	288.4		152.4	227.2	217.5		170	283.6	186.7
1893	155.7	249.6	298.8		151.9	225.1	211.3		170.3	281.6	188.2
1894	153.1	245.8	296.5		155	217.9	217.4		167	288.1	184.8
1895	155.9	252.1	287.1		154.9	227.9	214.7		170.7	282.2	181.3
1896	155.3	251.8	288.9		152.5	223.7	213.6		169	280.7	181.3
1897	156.9	244.9	294.9		153.2	224.6	211.9		167.6	281.1	181.4
1898	153.5	248.1	294.3		152.9	217.4	214		167.7	276.2	185.6
1899	157.1	244.9	286.4		153	227.1	212.2		170.1	287.2	184.1
1900	156.4	240.2	292.9		151.6	224.8	217.1		169.2	287.7	185.8
1901	154.3	244	287.9		151.5	221.3	216.3		168.2	283.7	178.5
1902	156.2	238	286.7		153.2	221.3	215.4		168.4	277.3	189.7
1903	155.2	241.1	291.1		153.8	216.7	214.6		169.4	281.7	179.2
1904	155.7	243.2	293.7		153	226.5	214		168.3	284.7	182
1905	155.9	241.2	296.2		152.9	224.5	213.7		168.6	289	193
1906	156	240.4	293.1		150.7	219.9	213.9		169.3	279.2	176.8
1907	157.2	244.1	295.6		154.1	225.3	213.6		168.5	277.9	187.1
1908	153.6	241.9	292.5		151.5	222.6	216.6		168.4	282.9	192.7
1909	155.2	232.4	298.2		150.7	222.7	213.2		168.9	287.1	189
1910	156.4	239.5	299.4		152.4	220.2	213.4		167.8	277.2	178.9
1911	155.7	241.6	301.4		152.8	223.9	212.6		170.6	276.2	193.6
1912	157.7	240.6	292.1		153.7	221.4	218.7		167.7	276.7	185.1
1913	156	234.3	299.4		151.7	219.4	215.1		166.4	280.7	189.8
1914	157.4	243.9	302.4		151.9	219.6	216.9		167.3	285.6	184.9
1915	156.4	241.1	301.4		153.6	220.1	213.1		167.1	288.5	189.8
1916	157.3	238.9	308.2		150.3	221.6	208		167.4	278.2	179
1917	155.1	242.9	302.3		151.9	218.6	214		168.5	292.1	184.2
1918	156.8	245.1	299.8		153.7	218.1	214.7		169	283.2	185.3
1919	156.1	239.7	307.8		152.5	221.6	215.3		167	290.8	182.2
1920	157.4	237.5	300.6		152.1	220.9	216.1		168.3	283.8	189.6
1921	157.9	239.6	302.3		152.5	225.2	220.8		166.3	281.8	179.3
1922	158.1	240.4	305.6		153.1	218.4	215		167.9	282.6	176.5
1923	154.7	233.7	304.1		152	222.4	215		166.8	293.1	189.5
1924	157.2	240.4	300.2		153.7	221.6	214.6		165.7	275.2	187.2
1925	156.5	236.1	297.2		151.3	224.3	214.9		167.2	289.3	184.3
1926	155.9	240.9	294.7		154.3	219.1	216		165.4	280.9	187.3
1927	158.4	239.4	300.2		153.2	214.7	220.1		166.6	287.6	182.8
1928	157.4	235	302.6		151.8	219.9	216.6		166.1	293.2	184.3
1929	158.2	246.1	300		152.1	219.1	217.3		164.6	293.8	185.6
1930	157.8	242.8	299.1		152	223.9	215.8		165.8	288.4	187.7
1931	156.3	248.9	303.7		152.3	216.6	215		165.3	278.5	182.6
1932	157.6	247.1	303.2		152.4	225.1	221.6		167.6	288.1	190.7
1933	155.4	241.4	304.9		152.7	218.1	215.9		165.5	282.1	177.2
1934	156.2	249.5	311.2		153.2	216.6	215.9		165.4	273.2	188.8
1935	158.5	249.6	310.4		152.9	228.4	215.7		163.3	285.3	180.8
1936	157.5	245.2	302.8		152.1	228.1	222.4		163.7	283.4	182.3
1937	158.1	246.8	309.4		153.6	222.1	222		164.2	278.8	180.4
1938	158.8	249.1	301.9		151.5	221.6	224		164.7	274.5	189.3
1939	158.1	249.4	310.4		153.8	220.7	217.4		166.6	282.2	183.3
1940	159	250	316.1		154.5	224.3	218.9		165.4	284.2	186.2
1941	158	245.1	317.2		151.5	225.2	218.4		164.6	275.8	178.8
1942	158.7	247.9	316.1		150.9	221.2	220.6		164.8	271.3	178.2
1943	160.5	249.2	311.8		154.5	229.8	218.3		162.5	282.2	183.4
1944	160.8	251.2	311.1		150.7	220.9	214		161.9	274	182.4
1945	157.8	253.2	318.4		152.4	224.6	219.7		163.4	278.7	183
1946	158.3	258	318.9		155.6	227.3	220.4		163.8	274.9	181.6
1947	159.7	243	317.2		155.8	219.9	225.7		166.8	269.3	180.2
1948	160.3	246	324.3		154.1	226.4	226.2		165.8	261.5	180.4
1949	160.6	244.2	327.8		151.6	226.9	224.9		164.2	263.1	177.6
1950	159.9	244.2	318.5		152.6	226.1	230.8		163.4	269.5	184.2
1951	159.6	244.5	323.4		153	218.6	231.3		164.2	274.9	182.1
1952	158.3	249.9	323.8		150.6	222.1	233.3		164	271.2	183.6
1953	160.7	251.9	327.7		152.1	228.9	232.4		163.8	280.9	181.6
1954	159.4	248.9	331.1		151.8	225.6	231.1		161.7	276.8	179.2
1955	156.7	247.1	333.2		155.8	222.1	236.6		163.5	269.4	183.1
1956	159.5	242.1	326.1		152.4	226.4	232.4		163.8	276.9	178.4
1957	164	242.9	340.1		155	222.5	234.6		162.9	270.3	184.2
1958	160.2	250.2	338.1		153.4	225.1	240		164.3	278.8	185.8
1959	161.7	243.6	333.1		152.8	217.6	235.4		163.5	280.6	178.3
1960	160.4	240.8	320.6		152.3	219.8	235.2		163	275.2	179.5
1961	162.9	247.6	333.2		154.8	219.3	237.5		162.8	276.2	184.2
1962	161.9	242	333.4		153.4	223.4	230.7		164.5	275.2	179.8
1963	161.6	248.6	342.1		152.8	224.4	233.7		161.2	263.3	178.3
1964	160.4	247.8	330.7		153.4	223.2	231.4		163.3	272.8	180.9
1965	159.2	250.8	337.3		152.6	223.6	229		163.7	278.1	185.5
1966	159.5	242.7	338.1		152.8	222.7	230.5		163	274.1	181.5
1967	160.7	248.5	334.4		153.6	225.1	230.4		163	253.7	185.2
1968	160.9	249.8	346.5		152.8	217.7	226.1		164.9	261.7	185.1
1969	161.3	240.1	340.9		154.5	221.3	225.5		166.3	262.2	177.2
1970	160.9	244	338.3		152.8	224.1	223		164.1	272.7	185.5
1971	160.4	251.5	340.3		153.8	225.5	230.9		164.5	266.2	179.6
1972	161.7	248.4	345.9		153.1	215.2	224.5		163.7	270.3	185.9
1973	159.9	238.8	333.5		153.3	219.8	226.9		166.5	272.9	181.6
1974	160.8	242.3	338.8		151	218.9	226.1		163.3	276	186.3
1975	160.4	241.5	338		151.5	223.2	222		164	277	183.5
1976	160.5	243.8	335.6		150.7	220.8	215.3		165.4	278.5	185.8
1977	160.2	244.8	334.9		154.7	223.1	219.9		166.5	276.6	185.9
1978	159.7	236.3	333.9		152.8	217.8	221		163.7	279.1	175.6
1979	158.9	244.8	331.9		154.1	218.5	218.8		164	278.8	182
1980	158.9	242.7	326.8		153.5	220.4	216.6		164.1	276.2	183.5
1981	158	237.5	320.8		152.7	219.1	217.3		164.2	270.9	182.8
1982	160.2	244.1	338.3		153.4	221.9	219.1		165.6	281.7	180.3
1983	157.6	247	320.1		154.3	221.2	213.9		164.5	293.6	182.2
1984	159	242.4	320.3		151.5	223.1	218.9		165.4	279.8	180.7
1985	158.2	244.2	311.4		153.6	219.1	219.4		163.5	288.9	180.9
1986	158.5	246	322.4		152.1	216.6	216.6		164.2	293	183.2
1987	157.4	244	324.8		152.2	216.9	216.9		165.5	284.8	185.2
1988	157.6	246.9	322.8		150.3	223.1	215.1		163.2	277.6	179.7
1989	160.4	245.4	318.5		151.1	215.2	223.2		164.2	275.1	184.8
1990	156.2	245.7	318.1		152.3	225.6	218.6		165.2	281.7	180.6
1991	157.1	242.1	310.2		152.7	220.2	224.9		166.2	284.2	182.7
1992	157	241.8	314.1		152.4	222.5	221.2		163.8	282.7	187.2
1993	159	239.1	315.3		152.4	224.4	222.9		167.1	278.2	185.2
1994	157.7	240.3	317.6		152.5	217.2	220.7		167.3	284.4	181.3
1995	157.8	242.4	306.8		153.9	220.5	229.3		164.6	283.6	181.3
1996	158.1	239.6	308.2		153.5	222.2	222.5		167.2	287.8	184.8
[truncated: 2,804 more rows]

## Sheet: AIA,AWA to 1.15uM dia
Figure 5S-2C
Stimulus	1.15 µM dia
	Video 1			Video 2			Video 3			Video 4			Video 5			Video 6			Video 7			Video 8			Video 9			Video 10			Video 11			Video 12
Frame (Pulse at 100)	AIA	AWA		AIA	AWA		AIA	AWA		AIA	AWA		AIA	AWA		AIA	AWA		AIA	AWA		AIA	AWA		AIA	AWA		AIA	AWA		AIA	AWA		AIA	AWA
1	159.2	198		191.2	288.5		153.7	274.7		178	191.5		171.8	190.6		174.8	200.5		142.2	245.3		148.7	233.5		160.9	235.9		164.9	169.7		142.1	167.1		168.9	167.1
2	161.3	195.1		193.5	288.8		154.8	276.3		181.5	196		176.3	187.8		174.9	205.7		141.4	246.9		148.9	235.7		161	230.8		158.1	174		141.1	170.9		169.9	170.9
3	162	192.1		185.2	280.7		154.3	271.1		181.5	187.7		169.3	187.8		174.2	202.7		142.8	239.6		150.6	232.9		159.4	233.2		159.1	171.7		140.6	169.3		165.8	169.3
4	160.7	196.4		188.6	270.8		153.3	268.3		180.8	191.1		173.4	188.6		178.1	203.3		142.9	244.7		150.6	229.5		163.5	232.1		156.4	168.9		139.5	173.4		169.6	173.4
5	160.5	189.9		186	279.7		155.7	279.5		185.8	189.9		175.2	189.2		174.9	203.8		142	242.4		151.3	230.7		160.5	227.6		162	173.1		142.3	169.7		171.5	169.7
6	162.9	192.7		190.1	281.8		154.3	281.7		173.9	189.2		177.8	185.9		180	200.6		140.8	250.7		151	231.4		161	226.7		161.9	172.2		140.2	167.4		167.1	167.4
7	160.7	191.6		193	283.8		153.6	283.4		181.2	194.8		172.2	189.1		170.4	200.4		142.3	239.8		149.1	229.9		158	231.6		155.8	172.6		143.8	168.6		164.3	168.6
8	160.1	194.5		185.6	280.1		155.6	278.5		178.2	189.5		178.4	187.8		176.1	197.9		143	243.1		153.2	231.9		160.1	227.1		158.4	171		143.9	168.4		167.8	168.4
9	156.7	198		188.3	276.8		155.2	279.3		181.8	196.9		174.9	190.9		176.1	197.1		140.1	241.2		147.7	231.5		161	228.9		159.5	170.5		142.7	170.7		166.8	170.7
10	158	192.2		189	283.6		155	275.8		186.2	193.4		171.9	192.8		176.8	200.3		139.2	237.2		149.1	226.5		159.2	232.5		159.6	171.8		144.9	167.3		167	167.3
11	158.7	191.3		184	280.1		154.1	284		181.8	197.3		176.4	193.9		172.5	202.5		141.9	244.9		148.3	231.2		159.6	236.7		160.4	174.9		142.3	167.6		168.3	167.6
12	157.1	193.5		187.7	284.8		153.3	281.2		182.8	191.9		176.5	188.9		169.7	203.3		143.7	245		147.4	234.5		162.8	234.3		159.2	171.1		144.2	171		171.3	171
13	159.3	190.8		192.5	279.8		154.3	297.5		179.5	193.8		175.9	187		169.2	198.3		141.8	243		150.3	232.4		158	231.8		161	175.8		141.4	169.1		165.7	169.1
14	158.9	189.9		191.1	286.4		155.4	296.5		184	190.6		173	191.4		176.4	199.7		142.8	249.6		146.2	230.3		158.6	231.3		160.2	170.9		142.6	169.6		168.9	169.6
15	156.3	189.6		184.2	286.7		154.5	298.4		171	194.3		177.2	192.2		173	202.9		141.8	241.8		149	231.4		159	232.8		160	175		140.5	168.4		168.2	168.4
16	158.2	188.9		189.8	296.5		154.9	278.9		177.7	187		177.1	191.9		173.4	199.4		145.8	244.7		148.9	224.7		160.7	230.6		162.1	172.9		142	169.2		168.1	169.2
17	158.7	186.4		189.2	286.7		157	277		175.7	195.1		170.5	185.8		169.3	204.3		139.4	247.1		152.5	230.5		162.5	227.9		156.4	171.5		144.4	166.7		167.4	166.7
18	157.7	191.5		190.7	293.3		155.9	290.3		184.5	185.8		176.7	186.8		174.2	200.4		140.2	246.8		150.4	224.5		160.7	225.4		155.9	170.4		143.4	166.5		166.7	166.5
19	156.6	189.6		191.7	293.8		157.8	296.3		176.2	188.9		175.2	191.6		171.8	197.9		142.8	241.2		148.9	226.2		159.1	227.2		159	172.4		141.6	167.8		168.1	167.8
20	159.6	192.8		191	285.6		154.6	290		178.2	184.8		170.8	189.9		174.7	200.4		140.6	243.8		150.2	232		160.6	229.1		159.9	173.5		143.2	169		164.7	169
21	159.1	192.5		192.8	290.1		154.6	285.3		174.2	188		174.3	192.8		171.7	197.5		143.6	239.4		153.5	229.7		159.2	225.6		160.2	175.7		145.4	168.5		170.2	168.5
22	159	192.9		185.4	289.2		156	287		182.6	186.6		177.7	192.1		175.6	203.2		141.1	236.1		153	226.8		160.3	227.4		157.5	172.3		143.4	167.4		166.8	167.4
23	158.7	195.9		190	296.2		155.5	291		184.8	186.7		171.7	192.1		172	195.2		141	249.4		152.2	231.8		159.6	224.6		155.9	172.5		144.2	166.8		168.2	166.8
24	158.3	190.1		189.3	291.2		153.5	286.7		180.6	187.3		173.3	190.8		170.3	197.4		142.8	243.7		151.8	233.8		160.8	228.4		158.9	172.9		141.8	164.7		167.3	164.7
25	155.3	191.3		186.5	290.4		155.3	283.5		177.2	189.7		175.2	193.7		170.9	196.5		141.2	244.3		150.3	226.9		157.5	227.7		158.7	170.9		145.4	164.7		166.6	164.7
26	159	183		190.2	292.2		157.9	288.9		178.4	185.3		177.9	194.7		174.6	191.9		141.2	239.3		147.9	225.6		158	222.2		158.2	173.6		142.8	165.9		167.4	165.9
27	153.1	192.7		190.9	293		155.6	286.2		182.2	191.1		180.8	193.3		172.9	197.5		140	242.5		150	226.6		157.3	228.2		159	175.9		146.8	167.9		167.4	167.9
28	158.7	190		192.8	295		156.3	286.9		182.6	191		173.8	193.6		176.4	191.2		139.4	242.3		147.8	229.8		161.7	219.3		158.5	168.7		142.1	168.3		167.2	168.3
29	162.2	189.1		188.7	288.3		156.1	278.5		180	192.5		173.1	191.7		174.9	200.9		140.8	243.8		151.9	231.1		159.9	221.3		157.3	174		143.1	167.6		166.7	167.6
30	163.2	192.8		193.5	292.4		155.7	285.3		179.9	189.2		174	196.1		173.8	201.3		138.8	239.4		151.4	231.3		161	222		160.2	174.6		142	166.2		168	166.2
31	158.6	189.6		187.3	282.4		154.9	288.6		184.8	195.9		176.2	192.8		170.3	190.2		142.2	239.4		148.2	229.1		159.7	223.8		157	173.6		141.9	166.4		167	166.4
32	159.1	191.2		189.5	282.7		156.5	278.4		183.8	191.9		177	198.9		176.4	193.8		139.8	247.4		150	233.4		160.2	220.5		157	170.8		139.7	169.5		168.1	169.5
33	156.7	192.1		193.3	289.5		156	286.5		181.8	186.8		177.1	194.6		173.8	196.4		143.6	244.6		144.4	229.3		160.2	224.2		155.2	174.8		142.7	165.8		166.5	165.8
34	160.2	188.6		192.7	288.1		155.2	279.5		177.9	193.6		172	191.4		170.4	199.3		139.8	237.2		149.9	226.2		159.2	226.9		156.4	174.8		144.8	167		169.1	167
35	158.6	188.6		190.3	283.4		157.6	268.3		176.7	190.8		187.1	191		174	197.8		139.6	248.4		151	230.7		158.9	224.8		158.5	171.2		144.6	167.2		169	167.2
36	159.6	191		184.7	285.9		155.8	284.5		179.8	190.7		177.5	193.9		171.2	192.1		141.4	245.6		151.1	227.2		158.1	227		158.5	177		144	166.6		166.5	166.6
37	161.1	190.7		190.2	289.3		156	283		175	187		178.4	195.1		174.2	194		143.8	237.1		153	227.2		156	226.3		162.9	177.1		145	167.2		168.8	167.2
38	158.7	191		187	288.2		155.5	281.6		176.8	187		173.8	193		170.3	196.2		142.3	239.8		154	229		154.7	218.2		154.6	176.9		146.2	166.2		169.3	166.2
39	157.2	190.3		187.8	278.9		156.2	283.4		179	187.2		177.8	196.5		172.2	198.1		139.4	243.1		151.6	229.9		156.8	226.5		158.1	176.2		146.4	165.2		167.4	165.2
40	158.7	190.9		194	281.4		156.8	281.7		180.5	196.5		180.8	196.9		169.9	193.4		141.4	245.7		147.8	224.5		157.2	220.3		161.5	179.4		145.7	165.8		164.3	165.8
41	156.9	191.5		186	280.3		157.1	283.3		186.7	191.8		174	192.8		173.7	188.6		141.3	244.1		149	227.9		161.1	224		161.4	175.4		145.2	163.8		163.8	163.8
42	160.7	195.4		190.3	279.2		156.6	277.7		185.4	191.8		185	190.6		170	190.9		140.6	243		150.9	233.2		156.8	224.3		158.7	176.4		145.6	168.2		167.7	168.2
43	160.4	194.3		186.5	283.4		156.2	284.2		177.9	186.9		175.6	190.4		167	190.7		143.2	238		148.5	232.7		158	222.3		158.7	176.1		145.8	164		169.5	164
44	159	195		189.1	286.8		155.8	278.5		179.8	191		174.1	194.7		170.1	185.3		140.8	243.7		148.6	230.3		159.1	223.3		158.2	175.7		142.2	165		166.1	165
45	161.7	190.3		181.2	285.8		156.3	284.4		179.7	190.9		174.1	192		166.7	192		141.8	243.1		150.6	230		159.1	227.4		154.5	178.7		143.3	170.2		167.5	170.2
46	161.5	199.8		185.5	292.1		154.9	273.4		181.8	190.3		170.1	191.9		170.2	195.6		142.2	245.7		150.8	233.2		155.8	224.5		156.1	178.4		144.9	165		166.7	165
47	158.6	192		188.8	291.2		154.6	279.4		186.6	194.5		179.5	191.9		169.2	191.2		139.7	247		150.2	227.6		157.7	226.3		160.1	177.2		143.4	168.4		165.2	168.4
48	157.9	194.5		182	288.2		155.8	278.7		180	192.8		180	195.2		170.1	188.6		139.9	245.3		149.1	227.5		158.7	219.9		158	173.8		144.1	168.8		169.4	168.8
49	160.6	188.8		189.4	290.5		155.4	284.3		180.3	192.2		180.7	194.4		165.5	189		139	246.3		149	231.6		156.9	224.7		157.3	177.8		143.3	166.4		169.3	166.4
50	159.3	193.1		188.2	292.1		157.6	280.2		186.2	189.4		178.2	191.2		170.1	191.9		140	247.8		151.1	227.8		161.7	224.2		158.5	176		140.6	165.8		167.4	165.8
51	161.3	196.7		187.7	293		155.5	283		180.1	189.4		179.8	192.9		170.1	191		141	250.3		147.8	227.8		158.6	223.4		158.2	177.4		145.1	166.7		169.1	166.7
52	159.4	193.6		184.9	287.7		157.4	264.9		183.8	190.2		183	195.2		170.8	188		145.1	239.8		152.9	231.1		160.3	229.1		157	175.8		141.3	166.3		168.2	166.3
53	157.1	192		186.7	286.5		158.1	269		176.6	191.2		174.5	195.8		169.4	189.9		144	242.1		150.2	225.8		157.3	222.4		159.1	174.6		145.7	168.8		169	168.8
54	162	193.3		181.8	286.9		155.9	265		176.2	189.6		182.2	184.8		171.7	188.3		141.6	243.9		149.5	232.5		160.7	225		163.5	175		148.5	166		171	166
55	160.3	193		186.8	288.9		156.5	280.8		176.1	190.7		178.1	196.1		169.2	187.7		145.2	245.8		151.3	229.8		159.5	224.2		158.7	177.2		147.8	165.9		166.9	165.9
56	156.8	194.8		185.3	283.2		156.1	276.7		186.1	192.3		175.3	189.8		171.4	183.3		142.6	245.4		150.4	234.7		155.5	224.9		162.3	174.7		145.9	166.5		168	166.5
57	161.8	188.7		182.8	288.1		157.6	279.1		181.2	188.1		167.5	191.2		170.8	188		144	247		149	226.2		158.8	222.2		160.2	171.4		147.3	168.1		170.5	168.1
58	161.9	192.5		185.4	284.9		157.7	271.1		181.8	193.7		178.6	196.7		171.4	188		144.2	245.9		149.8	233.6		161.5	227.9		160.7	177.5		146.8	166.8		170.4	166.8
59	161.6	195.8		185	285.4		158.3	267.9		185.5	194.8		174.5	189.9		173.2	187.1		145.1	242.8		152.3	228.3		156.3	224.2		159.6	176.1		145.2	167.4		169.9	167.4
60	163.2	191.3		183.9	284.6		158.5	265.8		176.6	188.2		180.1	191.1		170	189.6		142.5	241.3		148.4	225.8		156.3	228.6		160.9	175.3		147	166		171.5	166
61	159.8	198		187.1	287.5		156.1	264.5		177.6	188.7		178.7	191		174.6	187.8		144.1	239.9		151.9	233.7		157.5	225		161.3	176.2		142.9	167.3		167	167.3
62	158.9	192.3		184.2	285.6		156.4	265.2		181.5	191		180	190.3		174.3	189.6		145.4	241.9		150	227.6		160.4	226.3		159.7	178.6		146.5	167.9		169.4	167.9
63	158	194.3		185.8	287.3		157	271.9		174.2	193.2		179.2	188.2		174.4	183.2		142	244.9		153.1	224.7		155.1	227.8		156.1	177		145.6	164		172.1	164
64	163.4	193.4		186.8	285.6		157.3	266.3		181.1	191.6		176.6	191.9		172.3	186		143	243		146.3	224.7		154.9	226.7		161.4	173.8		144.9	165.1		168.8	165.1
65	161.1	197.1		185.9	287		157.2	269.5		176.6	193.1		169.2	201.8		172.5	184.9		145.1	243.5		148	229.4		157.3	228.2		157.8	174		145.6	168.9		167.4	168.9
66	158.6	192.8		185.9	278.5		157.5	266.7		186.4	183.3		173.2	182.2		170.9	188		142.2	233.9		148.7	229.8		158.1	218.6		157.8	176.5		144.3	167.2		168.8	167.2
67	159.8	191.3		184.4	281.7		157.4	268.2		183.9	193.8		178.1	193.6		173.9	185.6		143.1	242.8		150.9	233.6		158.2	223.4		157.5	175.8		144.2	164.5		167.2	164.5
68	163.5	193.7		189	277.4		158.6	266.9		178.8	189.4		180	194.8		171.8	186.7		141.5	232.9		150.1	233.2		154.9	234.8		151.2	173.9		142.9	165.7		171.3	165.7
69	163.3	194.8		185.5	288.2		158.7	262		179.8	193.8		169.4	187		175.1	190		139.9	246.7		150.5	230.3		152.2	222.3		158.6	174.5		145.4	166.2		169.4	166.2
70	156.1	194.7		189.7	281.7		156.3	267.5		182.4	191.2		175.7	202.1		171.8	190.3		139.4	243.8		150.8	230.8		158	229.4		160.8	172		143.6	167		167.3	167
71	160.2	191.3		186.1	294.6		156.4	273.9		182.8	188.5		173.5	191.3		174.9	188.7		140.6	242.6		150.1	221.7		156.9	226.2		156.9	174.7		142.8	165.4		169.3	165.4
72	157.6	193.9		187.9	283.3		157.5	272		180.8	193.1		170.9	193.2		174.9	188.1		142.7	241.8		149.8	227.7		153.9	225		160	172.5		143.5	168.2		169	168.2
73	155.8	189.5		183.9	284		159.7	271.1		177.6	183.1		176.9	196.9		172	191		142.8	240.1		148.8	227.9		157.5	224.4		160.4	172.6		145.1	168.1		168.3	168.1
74	156	187.9		187.2	288.1		158.4	264.8		179.2	188.9		179.8	194.5		174	187.5		142	243.8		146.5	227.8		159.3	221.3		161.7	174.7		140.2	166.4		166.2	166.4
75	156.1	193.9		184.5	290.2		158.2	259.5		177.7	192		184.4	183.9		175.8	192.2		142.4	246.4		150	233.4		156.3	227.5		156.3	172		143.4	165.7		164.3	165.7
76	155.6	197.1		189.5	283.5		158.4	265.5		177.7	184.2		172.6	194.4		174.7	192.6		143.6	242		149.2	229.9		155.5	224.6		154.9	171.3		144.4	164.1		170.3	164.1
77	155	191.2		187.5	294.5		158.7	267.1		178.2	192.2		169.6	184.8		171.4	189.4		140.1	248.2		151.3	230.2		157.2	228.6		159.4	175.4		142.2	168.9		166.8	168.9
78	159.4	193.9		186.8	282		157.2	261.5		183.2	186.9		170.8	191.1		175.1	193.5		139.8	245.3		148.8	225.2		158.5	222.6		158.5	173.1		140.8	165.2		165.3	165.2
79	158.7	193		190.8	285		158.4	260.5		176.5	188.3		172.8	192		173.9	191.8		140.8	245.8		148.3	224.1		158.5	227.8		162.6	172.9		142.3	164.4		166.8	164.4
80	160.7	188.9		190.4	295.5		157	261.3		175.8	189.8		170.9	188.5		171.1	188.8		140.4	245.5		148.8	230.4		157.2	230.4		160.6	171.2		138.8	165.9		167.3	165.9
81	156.8	195.4		187	291.5		158.5	266.5		178.3	187.2		177.3	192.2		176.6	188.1		140	243.7		151.2	234		159.7	228.9		154	170.5		143	167.1		168	167.1
82	156.4	196.5		185.7	289.2		159.7	265.4		182.3	184.9		180.8	193.2		173	193.3		142.1	245.6		151	231.8		157	230.7		158.2	172.3		144	167.1		166.6	167.1
83	156.7	192		186.5	290.2		159.3	262.8		183.2	185.2		183.3	188.5		171.4	190.7		144	244.9		145.9	229.2		158	227.4		157.6	173.1		139.4	166.2		168.3	166.2
84	161.1	190.3		187.6	294.2		157.7	265.7		176.7	192.2		179	190.4		174.7	189.6		141	244.3		151.7	236.5		157.9	228.3		159.5	171.3		141.7	166.2		167.2	166.2
85	159.8	188.5		187.1	291.7		159.8	272.8		182.9	191		180.2	195.7		174.8	188		139.8	243.1		149	231.5		155.8	224.6		157.3	175.5		140.1	169		168.3	169
86	158.5	193.2		188.5	289.4		157.4	269.7		182.8	192.7		178.7	202.8		170.3	189.2		142.6	249.9		150.6	234		160.2	231.5		155.3	173.3		144.6	165.2		166.4	165.2
87	159.3	192.6		189.3	297.2		157.2	272.4		180.3	186.2		180.2	196.7		174.2	191		140	255.9		155.2	229.8		156	235.8		158	168.2		138.8	166.1		168.5	166.1
88	161.4	191.3		189.4	296.5		157.4	275		174.8	192		178.6	197.8		174.8	189.1		142	251.4		151.4	232.3		156	226.4		153	172.2		142.4	168.2		169.2	168.2
89	156	191.8		193.7	298.5		159.1	283.4		182.9	188.8		173.8	195.8		167.6	191.1		143.3	249.9		149.3	230.5		155	224.2		157	171		141.3	164.6		166.2	164.6
90	162.3	196.1		190.2	295		158.5	291.4		180	191.2		178.7	196.9		169.7	193.6		137.8	252.2		151.9	232.1		155.5	225.7		157.8	173.3		140.5	168.3		165.8	168.3
91	160.8	193.8		190.4	297.6		160.7	272.7		183.6	189.5		171.3	193.1		175	188		141.5	245.2		149.9	229.5		156.3	220.8		158	173.2		141.4	167.2		168.4	167.2
92	161.6	194.7		192.2	297.5		158.9	290.6		178.8	188.4		179.1	192.3		172	188		140.3	252.9		150.2	233.2		153.3	226.7		161.3	171.8		139.4	165.8		169.2	165.8
93	158.2	193.6		189.2	297.6		158.9	292.2		181.6	190.1		179	195.8		177.1	188		145	244.4		152.7	230.5		154.6	228.4		157.9	170.7		139.6	168.2		170.6	168.2
94	160	191.5		191	298.8		159.6	278.1		180.3	189.2		176.2	197.9		174.4	186.3		144	248.6		153.7	230.9		155.4	224.2		161.7	174.7		140.4	166.9		167.2	166.9
95	164.4	198.6		195.1	302.8		159.2	289.1		180	192.1		181.2	193.8		174.9	188.3		147.1	245		153.1	228.5		159.5	227		159.2	171.3		140.1	164		166.9	164
96	155.4	193.4		192.9	304.1		161.4	273.1		178.4	189.9		178.1	189.2		174.9	190.9		142.9	247.3		151	226.3		154.7	225.3		159.9	173.4		140.6	166.1		170	166.1
97	158.7	193.6		195.6	308.4		158.7	290.5		177.2	190.8		187.6	196.2		175.8	186		143.5	247.9		152.2	228		156.6	222.1		162.4	170.8		141.1	167.2		167.4	167.2
98	158	189		190.6	303.2		160.1	280.7		177.2	192.5		185.6	199.8		175.9	189.2		142.5	247.2		151.5	224.3		157.8	225.4		158.6	170.6		140.4	166.8		166.5	166.8
99	159	188.9		190.7	302.5		159.7	300		185.9	187.8		180.8	186.8		171.8	187.3		143.2	252.8		151.8	227.7		158.3	224.8		158.6	171.4		139.4	167.2		167.7	167.2
100	160	193.9		191.2	302.4		159	285		178.5	193.7		180.4	201.8		177.6	191.3		141.8	249.5		152.9	230.3		156.8	223.2		157	174.1		141.5	164.8		169.2	164.8
101	158.2	191.8		192.1	304.1		161.5	279.6		185.3	184.2		182.2	196.2		173.2	191.4		144	249.8		151.2	229		158.2	218.8		161.9	174.2		141.1	166.7		166.5	166.7
102	159.2	187		190.9	304.9		160.5	281.2		182.2	187.8		177.8	194.4		173.8	190		143.7	246.1		150	231.6		158.2	220.3		156.1	172.2		141.5	166.7		168.5	166.7
103	161.3	194		189	302.8		160.6	286.3		182.7	190.7		180.5	198		170	192.5		142.9	250.9		153.2	239.7		153.8	229		161.9	176.5		142.5	167.1		167.1	167.1
104	161.4	198		197	307.1		159.9	286.4		184.7	186.3		186.1	200.2		172.9	189.8		141.8	256.7		150.3	258.4		154.5	235.6		157.8	174.4		140.6	169.7		168.7	169.7
105	159	197.2		189.9	305.9		158.4	292.2		182.1	192.1		184.3	210.3		177	198.6		139.2	268.3		151.9	286.8		160.5	257.8		157.4	182.7		143.6	173.5		176.2	173.5
106	162.3	205.3		196.9	316.4		160.6	298.5		181.9	194.8		188.3	217.4		174.3	204		142.9	297		152.4	320.8		155.8	289.2		157.9	193.8		141.8	177.5		187.3	177.5
107	159	208.4		193.7	314.7		160.8	298		186.7	199		182.9	228.6		172.5	219		141.7	335.2		151.2	356.2		158.9	323.5		158.9	202.7		143.1	193.7		200.1	193.7
108	161.4	217.9		194.9	320.7		160.1	305.3		182.7	203.7		187.6	243.6		179.6	232.7		146	378.4		153	397.2		159.5	367.1		163.9	219.6		142.3	204.8		213.4	204.8
109	161.1	233.9		194.7	332.2		161.1	312.2		186.9	214		187.9	263.6		193.1	247.2		148.1	429.7		155.7	439.8		158.6	399		161	240.4		140.1	219.6		228.4	219.6
110	158.5	242.6		191.9	340.1		161.2	331.4		186	222		186.4	272.2		198.7	263.1		149.4	472.9		152	482.4		158.8	431.3		156.2	254.1		144.8	232.7		243.3	232.7
111	159.7	250		196.2	345.6		163.7	334		193.3	228.9		180.2	288.8		213.8	276.6		152.6	505.6		153	521.8		163.5	464.4		158.4	269.9		147.7	244.1		252.5	244.1
112	159.7	260.1		194.9	357.9		160.9	339.5		206.8	238.7		186.2	303.4		230.3	285		151.5	541.6		151.2	550.8		162.7	509.4		166.6	282.2		154	257		252.4	257
113	161.2	270		195.3	363.3		162.3	344		228.8	246.8		188.1	305.8		229.1	301.4		156.8	554.7		157.7	588.5		164.4	524.2		163.3	299.3		154.5	267.3		262.1	267.3
114	165.1	280.3		201.9	381.7		161.7	361		250.9	262.2		182.5	315.6		238.9	308.8		155.3	578.9		161.4	609.5		166.5	541.8		164.9	303.6		154.4	272.2		267.5	272.2
115	169.2	285.7		213.1	390.8		161.6	363.2		269.1	276.7		194.2	321.8		245	313.9		154.8	598.7		171.4	641.3		168.8	567		164.9	304.2		157	273.3		273.4	273.3
116	171.3	295		230.9	405.9		160.4	378.7		266.1	279.6		202.2	324.4		248.6	315.8		151.9	623.3		172	655.5		165.5	577.4		166.6	316.2		154.4	277.8		267.6	277.8
117	164.5	303.3		239.6	417.7		162	390.2		264.5	289.2		214.8	332.6		244.1	316.1		157.2	630.2		178.9	670		166.8	589.7		177.5	313		160.8	282		271.3	282
118	164.3	312.4		242	427		160.9	396		265.6	290.8		220.5	343.6		243.7	316.5		159.8	643.8		185.3	691.4		165.5	598.9		176.7	320.9		163.3	282.8		271.5	282.8
119	172.5	314.7		242.4	433.8		161.7	410.9		270.7	292.8		231.9	343		246	318.3		157.4	652.2		185.9	692.7		167.6	604.6		180.3	321.1		161.5	290.1		272.1	290.1
120	171.1	320.3		251.8	449		161.3	412.3		271.1	308.8		226.7	341.6		245	320		159.6	673.5		186	709.3		169.3	625		176.8	325.8		159.5	285.5		272.8	285.5
121	168.9	326.6		275.9	457.8		158.4	423		268.6	304.1		228.1	348.7		243.4	320		160.5	682.1		185.6	714.9		174.8	629.7		186	327.4		164.3	285.9		279.3	285.9
122	167.2	334.7		278.3	467		160.5	437.7		274.3	316.7		230.2	351.5		235.3	322		156.6	689.1		178	710.6		169.8	619.7		179.4	331		164.6	288.2		272.2	288.2
123	171.9	335.7		276.5	478.2		160.9	444.2		276.5	321.9		231.6	360.2		231.4	320.5		158.4	705.7		176.3	730.8		171.7	623.9		184.1	322.7		159.4	289.4		268.2	289.4
124	181.4	345.9		283.9	480.2		160.8	449.4		272.9	324		227.2	354.7		236	322.4		155.7	715.3		172.6	737.5		170	628		185.9	327.9		163.8	289.6		271.1	289.6
125	187.5	353.1		286.8	495.2		163.8	448.8		275.2	343.8		217.1	350.3		229	327.3		156.2	729.4		173.4	743.6		168.7	638.9		185.3	326.4		163	285		273.9	285
126	182.5	355		286.5	491.5		163.9	459		269.9	346		229.7	367.2		233.2	321.8		156.7	731.2		171.7	735.7		170.3	646.2		187.6	327.2		161.2	288.7		275.4	288.7
127	181.2	353.9		292.4	503.4		167.7	473.4		269	348.2		226.2	354.4		223.8	323.3		155.2	739.5		176.8	748.3		170.3	638.7		183	325.2		160.5	288.6		274.2	288.6
128	186	352.9		296.4	513.1		169.2	475.9		262	364.1		224.4	366.2		224.6	317		155.3	746.6		170.4	761.3		174.2	647.9		184.1	323.7		161.8	287.8		271.1	287.8
129	190.1	358.2		297.9	517.4		170.3	487		259	366.4		226.5	368.8		227.8	314.6		159.2	753.6		168.6	754		172.5	650.3		183	321.9		160.9	287.3		276.4	287.3
130	189.5	352.8		296.2	537.1		169.3	498.9		254.1	367.5		224.2	371.9		224.5	326.6		155.2	760.1		164	761.7		169.1	652		181.2	323.8		157.8	290.5		267	290.5
131	185.4	357.6		294.5	531.4		172	495.9		249.9	375		221.6	360.8		229.6	317.1		156.3	764.3		168.6	760.7		173.7	658.1		185.7	331.3		159.7	293.1		271.8	293.1
132	188.1	362.7		300.6	534.3		168.9	510.7		247.5	383.8		220.1	367.5		227	325.9		159.3	759.8		164.3	759.6		166.8	663.1		187	332.1		165	292		270.7	292
133	182.5	358.2		314.9	538		167.8	511.6		249.2	395.3		221.5	365.7		224.9	314.2		157.9	775.5		162.8	767.2		168.1	656.7		190.6	329.7		160	287.1		264.7	287.1
134	180.6	346.8		308.5	540.1		167.2	519.9		244.9	391.6		212.4	373.1		220.2	314.1		155.2	762.9		165.2	774		169.6	663.1		194.5	334.8		161	286.8		267.2	286.8
135	186.4	363		316.4	558.4		168	538.5		245.8	390.1		213.5	366.3		221.6	319		155.7	777.1		164.2	765.8		168.3	662.3		192.4	337.7		159.2	288		270	288
136	176.8	364		315.7	558.5		168.7	539.7		237.2	382		213.9	360.8		214.3	315		154.3	776.3		161.4	775.2		166.3	663.4		187.8	333.5		160.7	292.9		267.1	292.9
137	180.1	367.4		317.4	559.7		167.1	535.1		243.8	398.4		216.1	364.1		212.3	317.7		152.9	769.1		161.6	779.9		167.7	673.7		190.2	329.1		157.4	295.7		265.1	295.7
138	179.1	361.7		313.7	566.2		167.7	556.1		240.1	394.8		215.4	360.3		211.8	313.1		155.5	779.3		158.3	760.8		165.2	671.5		188	329.8		159.3	290.2		269.1	290.2
139	181	368.4		313.3	575.6		166.1	552		239.9	409.4		215.8	372.2		211.1	313.5		151.8	767.1		164.8	772.1		167.3	664.3		188.3	337.1		158.6	291.2		263.2	291.2
140	180.7	358		310.1	581.8		168.1	545.9		231.8	388.2		217.1	359		215.6	311.6		152.3	773.6		159.2	778.4		164.8	655.8		186.7	334.4		161.8	292.3		263.9	292.3
141	181	360.2		308.4	581.5		167	563.6		231.5	399.2		214.3	357.2		211.5	315.5		150.8	770.2		161	772.3		169.7	652.7		183.6	335.5		162.4	288.4		261.9	288.4
142	174.1	367		307.1	579.2		167.6	570		229.3	402.8		207.4	366.8		211	311.6		152.5	772		159.4	775.8		161.4	672.6		184.2	330.9		157.8	281.4		260	281.4
143	179.2	359.7		305.1	599.5		167.3	569.5		227.7	396.7		216	367.4		211.6	306.4		149.2	787.1		162.2	762.1		161.9	671.2		185.5	329.4		162.6	281.2		255.9	281.2
144	177.9	359.9		305.4	593.7		164.7	564.1		229.8	403.6		209.8	371.3		214.9	311.7		149.8	771.6		157.3	775.2		165.1	662.2		184.7	332.2		161	286.3		260.6	286.3
145	184	345.4		307.5	604		165.9	558.9		222.4	402.7		214.4	364.7		211.1	303.8		149.9	769.8		156.6	769.3		167.3	662.9		183.5	327.6		160.6	279.8		255.1	279.8
146	181.2	359.8		314.2	604		163.4	565.6		222.8	402.6		210.3	360.8		207.9	303.7		151.2	777.1		155.2	766.6		167.5	664		183.9	331.8		160.1	285.5		260.7	285.5
147	182.2	359.3		306.5	594.5		163.6	579.4		221.8	398.2		210	358.8		209.5	303.4		149.1	761.2		157	758.2		164	648		187	326.8		160.9	275		255.3	275
148	188.8	350.7		307.7	607.9		166.1	571.6		223.8	392		207.5	347.2		206.4	302.3		151.1	758.2		156.5	761.7		165.4	652.4		183.9	323.4		158.4	286.8		256.6	286.8
149	187.1	358		314.4	613.3		165.3	574		221.3	392.8		201	355.7		206.2	299.9		150	756.4		158.5	768.7		171.1	651.8		182.6	328		161.1	276.8		253.8	276.8
150	188.5	356.9		313.4	603.5		163.5	576.1		215.8	391.2		197.5	352		205.6	296.1		148	757.7		157	753.3		170.2	645.7		178.1	327.4		162.7	281.8		251.8	281.8
151	183	354.9		320.3	621.9		164.6	567.4		223.7	387.7		209.1	364		199	296.1		152.4	751.6		159.4	756.7		169	654.6		180.7	324.3		160.9	278		251	278
152	186.1	347.5		322.4	616.5		164.6	569.5		227.8	397.1		200.5	356.5		200.1	298.4		149	751		155.4	760.7		170.8	643.6		184.6	322.4		158.8	274.3		251.1	274.3
153	184.7	345.6		322.7	604.7		164.3	577.6		211.1	388.6		200	355.7		200.7	287		149.8	749.3		153.8	752.6		163	647.4		177.5	322.1		158.3	274		250.6	274
154	188.7	348.6		328.5	614.8		164.2	575.8		215.6	381.4		203.9	344.5		199	300.2		147.6	743		156.7	769.3		168.2	643		182.7	319.6		159.1	277		248.5	277
155	181.9	326.8		322	613.4		163.9	577.8		208.3	387.7		198.6	341.8		195.8	293.3		147.3	744.7		156.8	744.3		166.2	636.9		181.5	318		162.2	272.5		243.2	272.5
156	182.6	339.9		321.3	617.7		164.7	572.2		221.7	379.1		205.5	342.7		198.2	290.1		150.9	738.3		155.1	751.7		166.7	644.4		179.3	313.2		163.4	276.8		243.5	276.8
157	181.9	349.9		316.6	614.5		164.2	576.2		213	381.2		196.5	343.2		198.2	285.3		148	726.2		156.4	751.8		168.6	639.2		178.9	314.8		157.1	275.6		244.8	275.6
158	183	327.5		308.9	612.2		163.6	556.4		208.8	376.2		201.5	342.2		194.8	286.3		146.3	721.7		157	744.5		164.2	639.9		178	311		157.3	267.6		242	267.6
159	179.9	348		312.5	608		163.5	551.9		211.8	382.6		203.1	342.8		195.6	286		146.5	739.2		157.1	746.6		164.3	653.4		180	310.2		159.9	269.8		241.1	269.8
160	179.3	339.7		308	617.6		170.4	556.6		209.8	376.1		199.3	344.8		189.8	289		149.2	725.4		155.6	740.9		166.2	632.1		177.6	309.1		161.1	269.9		242.6	269.9
161	177	337.5		301.5	609		172.7	555.5		203.7	383.4		201.9	334.3		193.6	281.8		150.6	722.3		156.2	742		162.4	635		173.9	306.2		158.7	271.5		238.8	271.5
162	181	344.1		300.9	605.7		176.1	576.9		208.8	372.2		198.2	337		192.9	281.3		145.9	720.2		153.4	739.3		163.8	630.4		172.7	307.7		158	270.4		237.3	270.4
163	179.6	331.7		299.3	590.6		180.2	566.7		206.2	381.1		190.9	333.3		187	270.9		145.1	712.5		159.7	733.1		163.3	627.7		172.4	296.4		158.7	265.2		241.3	265.2
164	177.1	337.3		292	600.9		176.9	562		208.4	365.5		195.2	332.7		181.6	275.3		146.3	715.9		158.1	733.1		161	629.3		172.2	302		154	267.2		237.8	267.2
165	176.9	338.2		288.5	606.2		176.3	571.9		201.2	382.9		194.3	341.5		183.3	276.9		143.7	719.6		154.7	736.9		161.4	626.4		175.7	298		156.1	266.2		241.4	266.2
166	175.7	320.2		287.6	591.9		174.4	567.7		205.3	379.8		191.4	330.3		185.5	271		147.2	713		160	730.3		162.7	620.8		176.1	297.2		158.5	265		239.4	265
167	175.7	326		287.8	594.7		173.4	554.4		203.7	367.1		194.6	326.8		187	273.1		145.1	720.3		158.2	722.8		166.6	612.6		168.5	296		156	261.5		235.2	261.5
168	173	325.7		285.3	594.9		172.9	565.6		203.2	372.7		188.7	331.4		187.7	271.1		145.3	699.9		159.1	724.5		160.3	625.8		171.1	293.8		155.9	264.8		236.1	264.8
169	166.2	324.8		285.6	580.8		172.1	552.5		201.8	360.2		188.4	325.5		185.9	271.3		147.9	700.9		154	717.2		161.6	630.4		172.5	291.7		157.9	261.2		238.1	261.2
170	168	315.1		279	594.9		168.3	550.5		195.2	360		198.1	319		184.5	273		144	699		156	719.2		160.6	627		169.5	291.2		158.1	258.3		237.8	258.3
171	167.5	321.7		273.5	592.6		168.8	557		194.8	365.2		196.2	326.5		178.9	267.7		144.1	697.1		156.8	717.5		160.6	619.7		164.3	294.4		156.5	259.9		235.7	259.9
172	163.7	315.8		267.1	591.8		170.2	544.5		193	357.6		189.8	314.4		179.3	268.4		145.5	700.5		155	718.6		164	604.6		165.5	290.2		153.4	261		232.2	261
173	171.5	318.1		267.6	573.5		167.2	542.9		198.1	364.8		192.5	326.5		182.9	270.5		147.1	702		159	707.1		161.5	604.4		163	289.7		155.1	257.2		226.6	257.2
174	166.5	299.9		261.4	583.5		168.8	541.9		197.3	352.7		192.6	323		183.2	270.9		144.1	692.2		153.7	705.2		160.1	605.2		169	283.6		157.6	261.2		227.7	261.2
175	166.9	318.5		259.6	581.6		165.5	545.9		196.3	347.6		184.8	321.4		180	265.7		145.1	693		158.1	697.6		162.7	602.2		165	283		153.5	254.7		232.3	254.7
176	168.3	320.1		263.7	573.5		167.4	540.3		196.8	349.1		195.3	307.8		179.3	273.9		142.1	673		155.1	708.7		162.5	599		160.3	283.8		155.8	258.8		233.2	258.8
177	168	314.9		264.1	581.5		167.4	540.8		191.7	357.2		193.2	312.5		180.6	260.6		142.8	684.8		155.3	698.3		162.4	596		164.3	277.6		154.5	256.9		227.8	256.9
178	169.7	305.6		258.7	574.4		163.9	525.2		194	353		193.8	304.4		175.1	261.9		144.3	676.2		158	706.3		163.3	598.8		163.9	282.1		151.9	257.9		229.2	257.9
179	166	305.2		259	571.7		165.4	531.8		196	352.2		193.1	311.8		177.3	257.4		145.2	672.2		159.7	708.7		163.7	592.7		162	280.8		152.8	263.7		232.2	263.7
180	167	309.4		263	563.9		163.7	541.3		189.8	352.8		190.2	316.5		180.7	263.6		145.8	661.2		155.7	702		164.8	590.8		162.7	281.9		153.5	258.3		226.8	258.3
181	161.4	305.8		255.4	563.4		165.5	531.1		192.5	345.7		187.2	305.7		173.7	258.8		143.2	667.6		154.5	695.5		165.3	578.4		160.5	278.5		152.9	250.5		225.8	250.5
182	163.5	290		254.7	563		162.2	531.8		192.2	347.5		185.2	314.3		180.4	258.5		140.9	652.1		154.5	691.2		165.8	591.7		162.4	275.5		156	252.4		222	252.4
183	166.5	300.1		250.7	560.7		162.3	511		184.5	348.7		187.6	301.8		175.3	254.9		144.5	657.9		151.5	680.7		162.3	572.9		160.8	276.2		155.2	249.4		226.5	249.4
184	161.9	299.2		249.3	562		162.3	515.1		188.7	345.9		184.7	297.5		176	254.9		142.4	666.3		158.5	691.6		162.3	575.7		157	275.6		154.5	250.8		226.1	250.8
185	164.2	296.3		246.2	555.3		163.7	537.3		192.1	345.9		186	302.2		178.4	255.7		140.5	652.5		157.7	686.3		164.5	579		160	278.6		152.8	247.8		226.1	247.8
186	162.4	299		244.6	550.5		161.8	522.3		189.5	338.6		184.7	301.8		178.8	251.4		143.8	639.5		153.1	675.1		164.5	576.3		161	278.5		156.2	249.7		222.9	249.7
187	164.2	297.1		242	552		161.8	525.3		184.4	331.8		192.2	298.2		180.7	249.9		145.6	647.5		157.8	678.8		161.7	572.4		158.4	279		153.5	245.2		225	245.2
188	165.4	296		244.5	558.2		161.7	518.2		183.2	341		181.5	304.2		178	250.3		142.6	641.3		155	680.7		160.7	566.3		158.1	275		154.8	250.9		226.1	250.9
189	159.6	283.4		240.8	553		160.4	519.1		182	337.7		188.2	298.4		172.9	250		144.2	622.6		156	677.9		163.3	573.2		159.8	276.1		151.8	249.2		222.8	249.2
190	160.5	292		235.4	543.6		161.9	528.3		186.3	340.7		183	286.8		177	244.6		143.2	637		155.4	669.2		162.3	580.9		158.7	272.9		154.2	244.4		223.1	244.4
191	159.6	292.9		244.1	548.6		159.1	526.8		186.2	339.2		188.2	292.2		171	242.8		141.8	646.7		156.8	666		161.3	571.9		162	273		153.4	248.7		222.6	248.7
192	162.1	293.1		240.2	543.3		160.4	520.3		184.4	331.8		181.5	291.8		170.9	246.1		144.4	637		154.1	670.2		163.4	565.5		154.6	271.8		150.8	245.5		223	245.5
193	160.3	290.6		235.4	539.5		160.8	523.7		183.8	337.1		187	291.8		174.2	247.4		143.7	620.3		154.9	658.9		165	559.6		158	273.4		154	245.3		221	245.3
194	161.5	288.1		247.2	552.6		161.1	518		181.1	340.7		185.2	289.3		170.2	249.3		143.4	635.9		153.7	672.3		160.2	579.4		165.3	266.4		152.7	242.5		216.7	242.5
195	162.6	285.2		229.9	545.2		159.5	506		185.7	336.9		176.3	288.5		168.7	246.1		143.8	630.1		154.3	662.3		161.9	564.5		159.3	265.2		152.7	244.2		220.9	244.2
196	161.2	283.1		226.2	537.2		159.3	504.6		187.2	332.2		183.3	299.1		172.9	245.3		145.2	617		156.5	660.5		161.3	560.1		162.7	270.9		153.3	241.2		218.1	241.2
197	160.5	283		228.9	537.6		158.3	518.7		184.9	327.5		185.1	289.7		170.6	247		145.1	610.2		154.5	654.5		161.5	556.7		160.2	268.8		153	243.7		219.2	243.7
198	163.5	283.9		226.8	543.5		159.5	516.5		181.1	327.2		183	290		171.4	243		141.6	619.8		154.8	652.6		162.1	564.9		159.3	270.1		153.2	238		220.4	238
199	159.1	278.5		227	527.7		160.9	504.1		181.6	331.5		178.4	282.2		164.4	236.2		141.8	614.3		153.2	644.5		160.6	555		162	260.8		150.2	247.6		218	247.6
200	163.9	277.7		225.1	537.3		157.9	499.1		181.6	326.5		179.2	281.9		165.8	242		142.7	598.4		156	642.3		159.6	556		163.5	261.3		148.9	243.2		214.3	243.2
201	159.6	277.3		229.8	544.1		156.1	504		178.7	332.8		182.6	281.2		169	237.8		140.8	608.3		153.8	645.3		161.8	547.5		162.8	258.4		149.6	237		217.8	237
202	159.2	280.3		223.1	530.7		159.3	505.5		177.7	325.7		180.8	280.2		162.7	239.1		144.8	601.9		152.6	645.3		161.2	536.1		159.8	260.2		148.2	237.2		218.5	237.2
203	157.8	278.8		220	529		156.7	503.2		185	317.8		177.5	283.7		164	235.6		141.9	597.4		152.6	636.7		160	540.8		160	260.5		148.5	239.5		216.5	239.5
204	157.6	274.6		220	523.1		158.2	494		179.8	321.8		176.8	275.2		161.4	235.7		141	597		157.5	626.7		157.4	531.2		163.7	255.8		150.4	243.2		213.6	243.2
205	163.4	277.7		223.7	512.7		154.9	471.4		183.2	319.8		179.1	276.6		166.8	235.9		142.4	585.5		152.4	617.6		160.1	533.5		162.2	251.6		149.9	235.5		213.7	235.5
206	162.8	270.6		218.6	519		154.9	491.7		180.2	324.2		186.8	264.2		163.1	230		141.1	581.2		153.8	616.7		160.3	524.3		159.6	251		148.8	230.9		213.3	230.9
207	161.4	277.5		217.1	507.8		158.3	476.9		178.8	314.3		176.1	270.4		162.9	231.3		142.8	579.6		156.8	608.3		161	505.8		163	251.4		147.4	229.4		205.8	229.4
208	160.7	272.9		216.5	506.9		155.3	476.6		177.2	318.7		178.2	275.3		163.8	226.1		137.4	556.9		153.2	609.7		157.2	504.3		160.2	242		148.9	232.8		208.2	232.8
209	159.4	280		212.1	499.8		156.8	454.7		183	311.9		182.2	260.4		160.8	224.5		140	564.9		155.9	600.3		160	488.3		164.3	238.7		149	227.8		208.4	227.8
210	161.7	274.4		215.3	471.1		156.2	466.4		178.2	307.3		174.9	261.5		164.2	225.7		140.2	538.1		151.5	580.8		160.5	497.3		162.6	233.5		144.5	223.8		205.8	223.8
211	161.3	275.7		208.8	491.8		155	449.5		178.3	301.8		177.5	260.5		163.3	228.4		139.5	538.1		151.8	566.2		160.3	486.1		159.4	234.9		146.9	219		203.6	219
212	154.9	269.5		215.5	481.9		156.6	455.6		176.5	300.4		178.2	257.7		161.4	219.3		140.9	528.3		152.8	567.8		157.5	476.1		159.9	231.8		144.2	219.4		202.8	219.4
213	157.8	270.9		206.2	471.7		154.6	449.7		172.9	296.2		176.9	257.2		158	221		140	505.4		151.8	559.4		158.4	464.9		160.4	226.2		145.8	215.3		197.5	215.3
214	158.9	269.6		210.4	464.3		155.3	446.9		177.9	297.4		176.3	255.3		163.1	217.8		140	512.7		153.9	557.4		160.2	462		161.7	221		144.8	218		198.2	218
215	156.3	272		208.4	465.3		155.4	439.2		178.5	291.8		180.8	245.2		161.1	223.7		139.3	502.3		153.3	536.8		158.2	456.3		162.1	219.9		141.9	211.8		195.2	211.8
216	156.4	263.9		209.4	461.4		155.7	422.3		176.4	282.5		180.8	255.8		153	210.8		141.8	496		152.8	538.7		160.8	448.3		165.4	222.3		141.3	208.7		198.5	208.7
217	160.2	264.3		206.3	448.8		157.4	421.2		182.1	275.5		182.5	250.8		158.4	208.5		140.2	486.9		152.5	520.8		155.7	447.1		162	213.2		145.1	208		197.9	208
218	159.2	268.8		203.7	455		157.5	417.9		181.8	277.7		178.5	251.9		157.9	212.2		138	482.1		155.6	514.9		156.6	452		162.7	218		144.1	207		190.4	207
219	158.3	267.8		205.3	425.2		155.9	425.4		179.5	266.9		175.3	244.9		159.6	206.6		137.5	475.7		152.4	508.3		160.9	435.6		158	212.2		139.7	208		188.8	208
220	162.8	258		206.8	441.3		154.9	416.8		185.2	267.9		175.5	236.5		155.7	210.6		141.9	462.7		152.5	495.1		157.5	424.1		162.1	214		141.5	204.7		191.6	204.7
221	161.8	260.7		209.1	445.3		155.8	405.3		176.8	267.6		183.6	241.6		156.5	208.5		141.7	456.8		149.9	484.3		160.1	422.2		162	205.9		142.6	202.9		189.2	202.9
222	158.8	259.1		205.8	429.5		154.8	405		178	254.4		181.8	239.6		157.4	207.8		140.2	455.1		152.1	490.2		155.4	418.5		165	207.7		141.4	200.8		185.5	200.8
223	156.1	255.6		198.8	425		157.4	398.1		173.8	258.1		176.5	239.6		154	208.2		139.8	449.7		154.3	471.9		159.8	407.5		159.9	208.3		143.1	201.6		187.6	201.6
224	158	253.4		202.9	432		155.6	402.7		176.1	262.9		183.2	238.5		157.9	204		141.2	434.7		153.2	468.7		162	411.1		158.5	203.4		140.9	193.8		190.9	193.8
225	161.5	254.5		201.2	425.8		157	385.1		180.8	253.8		184.8	237.8		161	202.5		141.8	433.9		150.7	467.8		158.6	399.4		163.1	201.8		141.9	196.8		184.4	196.8
226	158.7	251.4		206.5	421		155.9	386.2		175.3	258.3		174.4	229		155	206		140.6	438		156.6	463.5		160.9	396.9		162.4	199.7		143.1	197.5		183.7	197.5
227	163.7	260.3		204	423.3		155.9	390.3		172.8	251.2		187.7	231.6		155.4	199		139.7	421.5		153.9	453.1		161.7	380.7		160.6	200.8		141	196.2		181.1	196.2
228	159.2	259.6		198.5	409.2		156.5	381.5		180.2	253.5		182.1	224.8		158.6	202		142.8	419.2		150.6	440.2		158.2	384.7		155.8	201		140.5	192.2		185.3	192.2
229	160.5	258.2		202.4	407.8		156.2	388.8		174.6	245.3		187.1	227.5		158.9	201.6		142.5	407		154	438.6		156.8	379		161.3	200		142.4	192.4		182.7	192.4
230	161.2	255		203.2	400.8		155	379.8		183.1	246.7		186.8	228		159.1	203.5		139.9	409.9		151.8	433.3		157.5	366.4		157	191.3		142	187.3		183.1	187.3
231	163.1	254.7		189	425.1		157.4	374		180.8	238.7		182.2	226.5		158.5	196.5		139.7	406.4		158.3	428.9		156.1	377.4		162.2	195.6		139.3	192.3		181.8	192.3
232	158.1	252.6		195	427.7		155.1	370.2		176.8	240.1		181.1	233.9		154.9	198.7		140.7	403.3		153.6	421		162.4	368.6		161.2	196.9		142.4	190.2		183.7	190.2
233	157.2	249.4		204.3	401.6		156.7	378.1		173.2	237.7		179.4	227.1		157.9	199		139	402.6		152.9	415.2		159.4	365.1		158.4	191.8		141.1	190.9		178.3	190.9
234	164.6	258		200.8	392.4		156.1	382.8		179.8	233.7		179.1	226		156.5	202		141.1	394.8		153	413		159.5	354.8		158.9	192.2		141.8	187.3		179.6	187.3
235	160.5	251.8		188.9	413.8		157.6	380.9		178	234.4		174.3	225.3		160.9	197.3		143.9	393.6		150.8	402.5		157.8	351		160.5	192.9		141.6	192.5		176	192.5
236	164.8	258.6		196.7	422.4		157.1	383.8		180	233.9		181.9	222.5		160.5	197.3		139.4	384.8		152	400.1		162.5	357.4		161	189.6		143	186.5		177.8	186.5
237	158.6	251.5		196.8	407.7		158.6	384.3		177.9	229.2		182.6	220.2		163	196		139.4	383.2		155.8	393.7		161.6	349.1		158.8	188.7		139.8	183.4		175.4	183.4
238	164	255.7		196.8	418.1		155.5	384.3		179.3	226.7		185.2	223.1		163.8	196		140.7	373.5		155.6	390.7		158.7	344.2		158	190.9		141.6	180.8		174.8	180.8
239	160.8	255		194	406.5		156.7	388.9		178.8	228.6		184.8	213.2		158.7	197.6		138.7	376.4		150.6	384.3		157.5	337.2		159.2	190		143	180.7		173.2	180.7
240	160.9	247.6		191.3	409.8		158.6	389.3		183.3	222.8		186.9	216.4		161.5	198.8		141.9	377.2		152.4	386.6		160.1	343.9		160.3	191.2		144.9	184.7		176.1	184.7
241	159.3	248		192.2	407.5		157.1	395.5		176.9	225.8		176.8	215.2		164.9	194.4		138.2	371.6		151.2	378.1		155.8	338.9		159	189.2		142.9	181.8		176.6	181.8
242	161.2	250.6		192.8	413.2		156.1	383.5		180.2	225.8		177.8	225.5		163.9	198.7		140.9	366.4		150.2	373		157.1	328.8		155.5	186.8		143.8	184.5		178.7	184.5
243	162.5	257.1		193.6	406.2		157.4	394		178.8	220.5		191.6	223.2		163	195.8		140.3	365.5		152.8	366.9		158.5	332.4		161.5	185.2		143.8	181.5		172.1	181.5
244	161	254.6		187.6	412.9		157.3	392.7		183.8	224.4		182.2	214.8		159.3	194.7		137.5	360.2		154.5	363.2		162.2	328.7		158.4	183.2		141.2	182.6		172.8	182.6
245	159.6	250.1		190.1	404		158.6	385.2		177.8	221.2		184.4	220.8		161.8	194		141.3	369.2		156.1	362.5		159.1	324.7		153.3	188.7		143.5	179.3		171	179.3
246	157.2	250.3		197.6	404.4		155.5	383		180.9	220.2		185.2	220.2		162.5	196.5		137.7	347.1		150.8	352.5		160	319.7		152	181.7		143.2	179.2		170.7	179.2
247	159.9	254.7		198.2	402.5		157.3	377		175.5	224.4		183.2	211.3		163.6	194.8		139.1	363.2		150.9	349.2		155.5	320.9		158	183.4		144.8	182.6		173.4	182.6
248	158.3	257.7		193.6	401.7		156.5	374.6		180.8	222		177.9	221.8		158.6	190.9		139.2	343.8		153.1	347.8		158.7	316		158.7	187		140.8	179.7		172	179.7
249	158.6	253.2		194.8	394.6		157.6	372.5		181.3	219.7		180.4	216.3		159.5	191.5		137.9	338.5		151.7	343.5		158.3	311		158.1	183.4		142.4	176.1		170.6	176.1
250	160.1	252.8		193.1	389.4		155.9	372.4		179.7	218.3		183.5	215.6		160.1	195.7		140.3	340.1		149.8	344.1		157	308.1		157	183		141.5	180.2		171.3	180.2
251	162.5	249.5		194.1	381.5		157.1	365.9		176.6	223.3		183.9	220.7		157.7	190.7		138.5	346.3		150.5	331		157.4	304		154.4	183.4		141.9	175		172.4	175
252	162.9	245		195.8	382		157.8	367.3		184.3	216.5		181.3	208.3		163.4	191.9		141.8	337.7		158.5	332.2		160.1	301.2		156.2	181.5		140.5	181.5		171.7	181.5
253	158.4	252		195.7	381.2		158	372.6		178.8	213.8		179.5	214.8		159	191.7		140.2	338.8		150.4	328		156.9	300.2		158.3	179.4		141.1	176.9		169.1	176.9
254	156.8	249		194.2	379.4		160	369		181.8	211.7		175.6	215.9		157.9	195		138	335.7		151.2	325.2		158.3	298.5		155.5	176.4		142.5	174.1		172.3	174.1
255	160	252.2		195.5	379.3		156.3	368		179.5	215.8		178.8	219		161.7	194.9		139.4	333.4		150.6	318.4		157.7	289.5		159.4	181.9		142.2	177.9		170.5	177.9
256	158.9	258.4		193.4	380.9		157.1	358.8		184.8	215.6		176.9	210.9		168	192.1		135.3	338.8		151.2	318.6		156.9	301.2		159.1	177.8		144.1	174.1		172.5	174.1
257	161.5	253.2		195.3	373.1		155.7	362.4		182.9	209.1		181	221.2		160.3	190.3		138	325.1		149.2	317.7		156.8	295		155.8	179.4		139	175.1		171.4	175.1
258	160.1	241.1		193.3	369.4		156	361.4		181.6	208.6		174.2	215		155.3	194.4		141.8	328		152.1	312.4		157.4	297.6		160.8	179.1		143.6	174.9		168.1	174.9
259	161.7	250.3		192.5	374.5		156.3	361.6		181.4	204		179.2	219.3		158.6	191		141.2	320.1		152	304.2		157.7	285		157.3	177.8		143.6	172		169.6	172
260	159.1	249.1		191.1	368		158.3	354.6		179	214.6		181.8	219.2		161.1	192.2		140.1	327.2		153	308		160	290.5		156.2	180.7		141.9	171.8		167.9	171.8
261	161.3	245.9		192.6	365		158.2	350.9		180.5	209.8		172.8	213.4		159.8	191.6		141.6	322.6		154.5	299.8		155.9	291.4		155.4	180.2		142.5	168.6		169.8	168.6
262	162.8	241		194.4	362		156.5	353.1		177.4	204.8		177.1	211.2		161.8	188.7		139.6	317.6		151.6	306.6		157.6	279.5		153.8	183.9		141.7	173.1		168.4	173.1
263	159	232.1		199.6	361.5		158.8	349.6		177.2	211.8		178.3	212.1		161.5	192.9		140.5	316.1		152.5	302.1		157	281		157	176.8		142.2	172.8		171.9	172.8
264	160.3	237.6		192.4	364.8		157.9	350.6		179.2	206.8		176.4	214.3		160.2	190.2		140.9	317.6		152.9	304.4		155.5	278.1		155	175.8		141.9	173.2		165.2	173.2
265	160.1	237.6		197.3	359.6		157.8	339.4		184.6	206.8		177.9	211.2		156.5	188.7		137.6	314.1		152.5	301		157.7	283		155.5	176.5		142.4	172.4		166.5	172.4
266	154.6	232.6		193.1	355.5		157.1	338.9		181.3	202.4		182.2	212.5		164.4	190.8		138.3	315.6		153.9	291.2		155.2	276.6		155	176.9		142.5	171.1		165.4	171.1
267	159.6	239		192.8	350.1		158.3	340.9		184.1	209.7		180	208.7		160.8	191.5		140.1	320.4		151.3	291.4		156.5	281.4		156	180.8		142.2	174.6		165.5	174.6
268	158.2	231.5		195.7	344.8		157	344.9		185.5	205.9		177.1	208.2		158.9	195.5		138.5	317.5		148.3	289.8		153	277.9		152.7	177.3		141	173.9		167.8	173.9
269	161.7	234.1		195	336.5		159.1	330.1		181.9	206.2		175.2	208.4		161.7	190.2		140.6	306.7		154.6	288.1		157.6	281.4		151.7	178.7		142.5	175.7		166.4	175.7
270	155.8	228		194.5	342.3		158	345		181.8	202.3		179.4	208.1		158	189.9		139.7	311.9		152.7	286.5		156.3	272.2		156.5	176.6		140.8	172.7		169.9	172.7
271	162.5	225.4		194.2	337		157.4	338.7		182.4	202.8		182.5	209.2		160	193.1		138.2	308.4		155.7	284.9		155.2	280.4		156.7	179		145.2	172.7		165.2	172.7
272	157.6	233.1		188.3	355.9		160	339.1		180.8	203.2		178.1	209.1		159.4	188.7		138.8	298.2		153	284		161.5	277.7		156	177.1		140.6	175.1		169.2	175.1
273	157.9	235.3		194.1	336.9		159	331.2		185.1	202.1		181.8	212.9		161	193.2		139	302.6		157.3	278.6		155	280		156.4	174.5		142	174.3		170.8	174.3
274	160.5	228.8		194.1	334.9		156.8	337.3		180.9	202.9		179.8	211.3		160.3	189.6		140.4	298.9		153.5	281		155.8	272.2		155.8	176.7		140.5	175.9		165	175.9
275	163.6	229.9		198.1	328.2		158.8	330.4		177.8	201.9		174	214.9		161.8	190.7		140.7	300.4		152.8	275.1		156.7	275.9		154	176.6		141.6	174.2		169.6	174.2
276	162.7	227.7		193.8	328.4		158.1	321.7		184.1	196.3		178.1	207.8		160.2	189.6		139.4	293		149	275.7		157.7	272.5		153.4	174.1		144.8	172.6		167	172.6
277	158.9	224.9		197.3	324.6		159.6	332.5		180.7	202.8		173.2	208		158.6	189.4		141.2	296		150	274.9		153.8	270.2		155.8	177.5		141.5	174		167.2	174
278	159.1	230.2		185.7	350.5		157.1	330.1		181.6	191.5		178.7	209.6		164.1	192.4		139.8	292.8		149.2	272.6		157.4	268.5		154.4	177.8		143.9	177		166.4	177
279	157.4	225.4		189.4	342.1		158	319.7		188.9	204.3		178.9	204.5		160.9	190.1		140.6	296.6		150.7	269.1		155.6	272		157.2	177.5		141.3	173		167.7	173
280	160.1	224.3		189.1	346.2		157.1	316.1		185	193.2		181.7	205.4		162.3	189.2		140.7	291		152.2	271.2		154.5	269.7		153.2	176.9		143.4	175		164.2	175
281	156.4	223.3		190.4	328.5		158.9	321.2		180.2	199.8		177.9	207		162.7	192.2		140.8	287.1		150.3	274.5		156.8	262.6		151.2	175		143.6	178.1		170.1	178.1
282	157.9	218.4		185.4	333.5		157.5	327.8		180.8	206.2		183.8	206.4		160.5	192.4		142	286.3		152	267.4		157.9	267		154.8	179		145.9	174		166.9	174
283	157.4	222.8		186.1	331.1		157.5	319.6		177.8	198.3		185.3	202.3		159.7	195.1		138.2	284.2		151	265.3		155.7	258.3		154.2	177.9		143	172.8		168.6	172.8
284	158.1	217.1		187.2	331.8		157.7	319.1		184.4	197.8		179.5	207.2		162	192.5		138.2	284.5		151.8	268.3		156	268.8		151.9	178.1		142.9	175.9		164.6	175.9
285	160.1	217.8		188.2	331.6		157.1	322.7		174.7	201.8		177.7	211.4		163.6	195.8		141.8	282.6		150.5	264.8		154.2	256		154.3	177.1		143.8	171.1		168.1	171.1
286	159.8	216.9		191.3	330.7		157.7	326.2		181	194.7		171.4	201		160.4	190.4		139.2	282.7		153.2	263.5		153.1	261.3		156.3	180.7		143.5	171.8		167.2	171.8
287	159.3	212.1		188.7	331.7		157.8	309.8		184.3	195.8		178.3	208.4		164.2	194.8		138.6	278.4		153.2	264.5		155	257.3		150	176.7		145.8	175.2		168.5	175.2
288	158.4	216.6		187.6	334.1		158.2	317.2		180.4	196.4		176.5	205.8		163.4	187.5		141	284.1		152	260.9		152.4	251.5		158.5	177.2		145.3	171.4		166.8	171.4
289	158.6	219.9		190.4	331.1		157.4	314.5		177.5	198.8		182.2	210		160.7	192.3		138.8	283.5		152.9	269		158.5	258.5		156.5	178.7		147.4	175.2		163.1	175.2
290	160.5	214.9		186	328.7		157.3	306.4		183.9	201.7		170.2	207.1		162.4	189.2		138.7	284.9		153.2	264.6		158.6	257.5		151	183.5		144.5	173		167.5	173
291	160.2	213.5		188	334		156.9	317.9		183.1	196.8		181.3	211.5		159	194		138.3	283.8		154.1	260.3		157.7	253.3		155.3	179		145.9	176.5		166.9	176.5
292	160	214.1		191.7	334.7		157.2	313		180.8	198.3		181.9	208.2		166	190.7		143.7	283.4		149.8	262.7		158.6	262.4		154	182.3		144.5	173.8		165.2	173.8
293	158.6	216		189.3	324.2		157.2	312.9		185	201.8		186	209.4		164.2	191.6		140.1	282.2		151.3	257.2		154.4	254.7		153.2	180.2		146	170.9		167.6	170.9
294	160.5	215.3		183.3	322.9		159.5	310.3		187.6	198		182.8	206.4		165.2	190.3		139.2	275.5		153.4	253.5		157	254		151.6	183.2		145.1	168.1		164	168.1
295	161.6	213.8		190	325		157.9	305.9		187.5	198.3		184.1	205.9		164.5	196		143.7	280.8		151.1	255		155.1	253		158.1	182.1		145.4	173.8		165.6	173.8
296	159.3	215		195	320.5		160.4	305.5		189.5	200.2		180.2	213.2		164	197		140.7	267.5		153.7	255.7		158.6	249.9		154.5	180.8		145	170.1		165.5	170.1
297	161	208.9		186.3	318.8		159.3	307.5		184.4	191.9		173.5	207.4		164.7	195.1		140.9	272.5		151.6	259.3		159.2	251.8		152.9	183.3		147.7	172.2		166.5	172.2
298	156.2	213		189.4	324.7		159	301.5		181.2	203.3		183.2	206.5		167.4	195.5		138.6	274.9		151.6	256.3		155.7	244.2		154.3	185.8		146.4	173.8		168.7	173.8
299	152.9	212.8		185.3	324.5		159.3	314		180.1	199.6		181.7	205.9		168.1	189.4		145.1	277.3		151.6	246		154.4	251.7		153.6	183.7		149.3	170.2		167	170.2
300	155	213.6		190.8	313		159.1	304		183.8	198		178.2	206.8		166.4	193.4		141.9	275.8		154	249.3		159	246.9		152.7	184.1		146.9	174.1		165.4	174.1
