# Supplementary material for: Reliability of an interneuron response depends on an integrated sensory state
Source: eLife. 2019 Nov 13;8:e50566. doi: 10.7554/eLife.50566 (PMC6894930; doi:10.7554/eLife.50566)
Supplement: Figure 5—source data 1. [file elife-50566-fig5-data1.xlsx]

## Sheet: WT ASK to dia
Figures 5A, 5S-1A, 5S-1E, 5S-3J
ASK::GCaMP5A F(A.U.)
Stimulus:	0
Genotype:	WT
N:	1	2	3	4	5	6	7	8	9	10	11	12	13	14	15	16	17	18	19	20	21	22	23	24	25	26	27	28	29	30	31	32	33	34	35	36	37	38	39	40	41	42	43	44	45	46	47	48	49
Frame (Pulse at 100)
1	2610	4456	3916	2867	2422	2129	2520	2794	4196	838	1951	580	2000	1017	816	89	2923	7173	1380	3601	2275	3985	4618	1888	2645	3836	3026	4482	4545	2083	3019	3490	4104	873	1778	683	2503	1351	1062	239	3106	6690	2108	4146	2627	2997	4941	1610	2229
2	2630	4516	4101	3125	2233	2233	2441	2741	4367	705	1972	626	1925	984	1076	147	2783	6970	1438	3451	2166	4104	4443	1934	2702	3504	3146	4661	4510	2379	3033	3341	4018	949	1832	821	2506	1253	981	273	3035	6605	1998	4008	2527	3182	4675	1513	2172
3	2706	4195	4089	3147	2477	2116	2384	2925	4132	840	1800	569	1892	1072	1067	187	3043	6919	1480	3633	2164	3957	4689	1602	2654	3738	2831	4637	4307	2113	2869	3504	3913	1023	1679	910	2408	1254	1095	307	3471	7401	2066	3816	2847	2909	4659	1511	2210
4	2616	4508	4086	3101	2443	2154	2401	2597	3910	907	1812	534	2136	1098	915	168	2988	7068	1238	3416	2124	3941	4545	1652	2704	3783	3087	4607	4293	2203	2734	3588	4013	840	1755	828	2410	1186	916	205	3405	6530	2085	3800	2596	2838	4438	1455	2313
5	2913	4440	4098	3162	2393	1914	2339	2810	4085	869	1829	472	2027	1235	1082	120	2804	7246	1323	3222	2229	3924	4582	1643	2669	3790	3097	4871	4171	2368	2626	3314	4042	801	1620	912	2541	1299	1034	181	3038	6446	2013	3940	2469	3029	4257	1353	2128
6	2806	4413	4374	3149	2511	2139	2568	2834	3937	716	1927	536	2178	1073	880	146	2818	6955	1300	3712	2409	3887	4703	1651	2653	3916	3164	4653	4092	2528	3001	3475	4323	822	1786	883	2662	1288	894	396	3456	6939	2324	3946	2603	3027	4745	1459	2322
7	2894	4064	4396	3250	2298	2262	2321	2875	4245	758	1699	573	1810	1179	722	169	2837	7076	1196	3684	2180	3867	4401	1714	2704	3818	3178	4810	4190	2280	2764	3434	4031	862	1684	725	2397	1010	1237	201	2905	6523	2293	4036	2674	2740	4596	1329	2194
8	2663	4112	4017	3106	2402	2309	2314	2761	4363	812	1859	459	2305	1024	860	64	2903	6696	1281	3210	2342	3851	4482	1889	2724	3978	3021	4394	4054	2120	3019	3241	4052	1076	1930	827	2388	1155	1210	230	3256	7068	2260	3896	2658	2869	4372	1422	2429
9	2882	4166	3750	3330	2437	2042	2292	3081	4245	902	1713	628	2268	952	988	81	2892	6770	1534	3523	2196	3827	4448	1601	2840	3989	3099	4498	4064	2152	3307	3504	3927	990	1714	790	2450	1271	1143	325	2993	6533	2162	3868	2811	2869	4295	1429	2177
10	3003	4304	4172	3377	2277	1871	2446	2610	3810	806	1772	505	2240	947	922	172	2850	6551	1311	3303	2314	3850	4137	1702	2755	3904	2731	4666	3920	2180	3396	3093	4247	944	1825	821	2394	1342	1148	388	3276	6828	2264	4156	2567	2848	4262	1302	1810
11	2745	4393	4039	3208	2354	2200	2566	2964	4037	979	1675	485	2285	1082	700	204	2908	6951	1244	3296	2199	3866	4218	1990	3005	3892	3050	4433	3913	2305	3371	3131	4183	866	1830	766	2155	1235	1202	397	3408	6782	2181	3820	2385	2880	4435	1625	2278
12	2828	4698	4198	3401	2415	2258	2196	2775	3945	824	1818	511	2250	1098	577	168	2846	6641	1480	3720	2039	3732	4132	1844	2867	3782	3056	4693	4174	2066	3358	3323	4286	1079	1762	977	2474	1194	1161	320	3283	6691	2176	4010	2435	3063	4657	1546	2245
13	2942	4560	3393	3426	2289	1841	2326	2850	3845	803	1968	462	2151	1095	718	148	2658	7039	1496	3268	2170	3722	4121	1802	2766	3992	3041	4432	3942	2100	3308	3090	4496	824	1798	777	2369	1258	1038	329	3010	6628	2038	4036	2600	2922	4630	1350	2253
14	2919	4285	3994	3418	2369	2085	2412	2819	3514	898	1557	493	2045	995	702	161	2947	6692	1334	3495	2201	3603	4080	2012	2879	3843	2875	4492	3797	1883	3243	3030	4051	693	1778	858	2514	1409	1207	367	3165	7019	2096	4056	2731	2748	4532	1722	2264
15	2808	4548	3921	3299	2348	2131	2402	3045	3700	673	1751	527	2099	1173	699	148	2813	6382	1447	3155	2111	3852	3689	1588	2731	3895	2906	4626	3940	2074	3243	3163	4265	980	1939	878	2663	1143	1108	406	3231	6540	2228	4051	2544	2756	4372	1539	2199
16	2944	4423	4109	3697	2171	2211	2363	2875	3917	741	1834	597	2146	1092	943	66	3054	6667	1530	3049	2428	3818	3865	1871	3067	3925	3018	4560	4004	2086	3428	3071	4374	996	1908	904	2612	1189	983	301	3292	6649	2240	4321	2800	2775	4622	1579	2043
17	2643	4562	4031	3495	2399	1996	2224	2734	3803	904	1770	631	2386	941	677	261	2914	6785	1420	3302	2129	3592	4003	1746	2994	3846	2915	4328	3504	2026	2989	3363	4189	1072	1737	766	2404	1376	1054	295	3398	7067	2215	3974	2615	2978	4465	1514	2186
18	2954	4497	3620	3458	2142	2252	2238	2922	3586	882	1785	386	2380	805	659	140	2868	6335	1397	3427	2178	3779	3890	1975	2878	3845	2846	4573	3044	2428	3344	3331	4213	890	1774	823	2508	1443	1058	353	3258	6423	2140	4106	2816	2989	4397	1689	2075
19	2839	4444	3933	3537	2266	2106	2390	2697	3581	820	1810	647	2281	1119	827	164	3016	6552	1442	3405	2247	3792	3972	1712	2647	3744	2823	4670	3641	2161	3162	3280	3819	864	1918	736	2405	1272	1034	364	3490	6791	2129	4092	2701	2791	4305	1708	2125
20	2914	4843	3658	3659	2204	2147	2198	2921	3832	808	1690	600	2292	1130	788	194	2978	6468	1536	3277	2234	3591	3731	1867	2882	3627	2879	4298	3618	1956	3036	3194	4053	989	1670	846	2554	1241	1045	296	3100	6894	2098	3958	2524	2846	4572	1717	2228
21	2967	4821	3620	3565	2352	2072	2479	2773	3349	783	1815	562	2240	1202	682	192	2776	6598	1370	2830	2251	3622	3821	1696	3039	3778	3084	4402	2864	2367	3242	3282	4073	856	1600	798	2389	1147	1191	289	3413	6625	2148	3640	2699	2849	4727	1502	2294
22	2635	4612	4293	3726	2320	1948	2431	2635	3292	927	1872	589	2441	980	646	243	2961	6577	1530	3506	2408	3734	3693	1816	2757	3734	2799	4696	3534	2215	2906	3121	4217	1068	1677	730	2494	1150	926	367	2876	6473	2241	3881	2542	2650	4374	1509	2368
23	2720	4328	4192	3498	2273	2138	2534	2762	3507	907	1804	640	2437	1111	709	177	2854	6409	1307	3285	2072	3451	3544	1683	2970	3859	2959	4418	3453	2323	3155	3056	3999	834	1847	662	2517	1194	1018	299	3357	6747	2311	4213	2793	3153	4464	1441	2286
24	2668	4384	4278	3922	2317	2013	2338	2739	3398	755	1748	576	2348	1114	939	167	3056	6636	1350	3179	2050	3477	3356	1722	2967	3797	2812	4602	3598	2294	3054	3367	3848	936	1874	689	2430	1056	1029	141	3277	6531	2360	3878	2720	2872	4539	1352	2277
25	2672	4541	4076	3686	2480	2307	2516	2715	3435	785	1891	542	2330	1004	793	204	2778	6519	1319	2922	2147	3763	3597	1789	3008	3967	2863	4292	3407	2100	3202	3273	3907	925	1983	705	2650	1214	1135	294	2795	6343	2235	3838	2561	2877	4454	1463	1993
26	2890	4692	3811	3769	2328	2062	2562	2804	3411	780	2021	567	2245	1082	763	71	2964	6596	1341	2820	2165	3524	3704	1800	2751	3854	3049	4462	3416	2266	3255	3324	4051	850	1717	606	2152	1266	925	301	3030	6769	2365	4066	2871	2840	4662	1541	2385
27	2787	4420	3851	3793	2153	2180	2420	2833	3497	1024	1821	615	2123	1145	1077	254	2689	6544	1442	3501	2223	3670	3419	1678	2797	3871	2787	4158	3451	2022	3055	3578	3768	897	1868	709	2522	1186	1130	337	2709	7068	2255	3958	2718	2860	4360	1388	2111
28	2792	4593	4013	3557	2244	2007	2353	2599	3502	762	1746	426	2312	958	690	82	2761	6640	1492	3056	2059	3608	3471	1842	2755	3790	2665	4515	3421	2518	3205	3341	3375	1002	1992	703	2143	1293	1192	368	3366	6748	2464	3910	2530	2882	4716	1599	2160
29	2791	4714	3632	3562	2434	2117	2393	2656	3718	950	1795	559	2272	1283	960	228	2976	6146	1216	3420	2275	3627	3300	1933	2613	3951	2847	4494	3312	2206	3051	3342	3872	649	1780	873	2303	1093	1190	229	3418	7178	2141	4080	2392	2693	4247	1187	2271
30	2675	4375	3802	3619	2230	1937	2231	2574	3525	986	1787	564	2292	1309	725	383	2794	6610	1569	3396	2288	3424	3229	1609	2853	4078	2876	4572	3576	2373	2773	3405	3687	975	1875	708	2354	1135	1260	395	2959	6738	2056	3743	2694	2905	4591	1286	2300
31	2776	4267	3670	3783	2151	2202	2342	2534	3840	802	1768	507	2165	1131	847	76	2853	6250	1707	3103	2100	3758	3389	1883	2640	3917	2966	4575	3057	2562	3127	3353	3695	1063	1790	615	2217	1175	1220	182	2858	6980	2284	4278	2969	2911	4360	1702	2322
32	2708	4552	3895	3822	1992	1864	2574	2606	3659	842	1850	642	2195	1114	934	180	2752	6541	1465	3283	2205	3306	3273	1802	2644	3778	3116	4607	2832	2363	3010	3251	3855	981	1766	859	2374	1078	1153	333	3038	6725	2334	4034	2546	2558	4432	1656	2341
33	2530	4819	3796	3826	2314	1861	2295	2632	3476	873	2078	715	2291	1028	869	246	2820	6491	1451	2872	2173	3177	3349	1693	2741	3820	2734	4692	3075	2256	3004	3221	3768	820	1872	837	2230	1130	1224	208	3103	7294	2215	4173	2602	2700	4531	1470	2216
34	2712	4815	3788	3739	2088	2017	2493	2599	3417	802	1848	663	2048	1228	879	274	2664	6378	1292	3146	2107	3517	3166	1771	2593	3888	3048	4870	2873	2331	3084	3363	4035	803	1903	734	2326	1187	1013	206	2858	6665	2007	4107	2790	2763	4665	1551	2185
35	2380	4831	3569	3434	2131	1844	2512	2601	3687	940	1967	656	2143	1157	815	225	3023	6687	1603	2793	2203	3309	3090	2032	2662	3806	2868	4436	3067	2321	3157	3424	3638	805	1794	734	2483	976	1092	230	2885	6858	2290	3879	2800	2876	4527	1396	2075
36	2854	4802	3877	3721	2002	1952	2211	2535	3556	862	1936	513	2109	945	692	221	2703	6246	1344	3127	2177	3383	3328	1844	2667	3890	2841	4772	3633	2454	3049	3462	3634	894	1918	691	2311	1074	1125	497	3184	7370	1973	4252	2249	2701	4416	1431	2393
37	2771	4703	3770	3950	2152	1896	2371	2619	3968	877	2045	566	2312	1163	767	176	2665	6488	1324	2772	1915	3382	3212	1637	2807	3853	3096	4854	3121	2483	3135	3193	3856	789	1980	828	2415	1130	1201	454	3059	6807	2348	3900	2510	2760	4408	1207	2166
38	2467	4610	3759	3670	2220	1879	2309	2875	3683	951	1957	644	1864	1242	912	367	2639	6597	1590	3001	2129	3152	3138	1770	2734	3982	2881	4704	3005	2274	3278	3192	3809	741	1942	573	2076	1303	1055	510	2905	7592	2283	4051	2628	2632	4285	1448	2410
39	2545	4853	3938	3999	2221	2132	2425	2782	3456	990	2028	602	2122	1096	754	184	2727	6339	1305	3035	2233	3327	3152	1806	3010	3902	3005	4499	3482	2217	2842	3318	3886	963	2073	585	2167	1197	1233	704	3362	7321	2406	4186	2574	2711	4352	1404	2345
40	2353	4528	3996	4005	2246	1808	2409	2960	3615	828	1937	612	2191	861	903	260	2331	6548	1370	3263	2085	3219	3223	2013	2695	3638	3081	4810	3566	2639	2957	3273	3610	888	2089	834	2376	1180	1273	551	2915	6520	2155	4464	2837	2544	4503	1467	2638
41	2445	4612	3782	3782	2037	1953	2314	2881	3424	833	2020	512	2368	1193	841	354	2779	6192	1577	3191	2374	3273	3305	1720	2710	3693	3268	4666	3890	2547	3226	3143	3850	737	1841	610	2150	1197	1421	700	3106	7409	2472	4245	2718	2695	4326	1399	2028
42	2664	5101	3843	3761	2002	1997	2241	2695	3911	928	2041	621	2102	1040	997	245	2834	6377	1523	3109	2008	3066	3193	1910	2917	3955	3091	4633	3526	2442	3056	3330	3806	858	2068	794	2222	1103	1287	507	2677	6997	2410	4156	2599	2723	4389	1524	2290
43	2487	4865	3748	3897	1792	1921	2343	2871	3382	875	2044	542	2384	1080	880	306	2797	6453	1417	2939	2112	3295	3355	1905	2872	3747	3117	5048	2992	2269	2884	3391	3817	739	1867	683	2194	1096	1327	716	3243	7514	2332	4136	2369	2787	4342	1263	2431
44	2357	4592	3655	3754	1899	1788	2472	2724	3625	1154	2040	633	2019	1023	849	286	2862	6160	1354	2927	2210	3133	3147	1977	2983	3542	2903	4545	3534	2586	3078	3288	3789	881	2013	808	2173	1242	1252	698	3058	6745	2483	4300	2676	2558	4347	1277	2526
45	2678	4455	3776	3605	2103	1991	2239	2799	3789	1031	2104	632	2288	929	871	255	2912	6307	1443	3139	2199	3427	3471	1861	3014	3938	2895	4944	3613	2494	2937	3268	3889	819	1955	679	2103	1188	1318	489	2880	7238	2488	4241	2551	2762	4445	1737	2657
46	2514	4800	3081	3540	2108	2096	2223	2757	3736	945	2043	656	2084	940	950	318	2726	6346	1352	3112	2023	3084	3227	2028	3022	3539	3045	4607	3694	2438	2921	3003	3936	918	2255	633	2036	1226	1111	637	3239	6580	2469	4010	2513	2497	4218	1341	2567
47	2517	4783	3786	3766	2233	2047	2282	2676	3838	1056	2028	550	2158	896	683	133	2789	6126	1613	2976	2225	2996	3389	1720	2975	3764	3162	4504	3765	2602	3073	2832	3920	920	2033	706	2161	1168	1306	671	3112	7004	2657	4404	2618	2514	4244	1512	2542
48	2473	4616	3329	3798	2030	1904	2362	2933	3949	831	2031	573	2031	997	836	312	2899	6208	1341	3224	2194	3240	2897	1857	3043	3775	3049	4758	3587	2588	3084	2996	3943	827	2034	537	2130	1102	1369	712	2866	7191	2533	4248	2540	2803	4106	1565	2177
49	2583	4493	3439	3750	1837	1947	2271	2681	3909	842	1999	543	2222	1023	984	179	2814	6265	1648	3183	2174	3069	3160	1717	3161	3686	3161	4655	3744	2559	2812	3341	3898	836	1985	656	2288	1158	1227	571	2979	6586	2581	4211	2656	2582	4491	1505	2447
50	2436	4634	3369	3909	1948	1961	2264	2797	4022	984	2043	571	2088	914	894	400	2955	6331	1568	3295	2176	3364	3289	1842	2687	3274	2975	4472	3533	2552	2733	3455	3658	853	1882	614	2390	1199	1160	559	2834	7074	2523	4289	2428	2595	4184	1485	2311
51	2384	4740	3585	3557	1997	1931	2196	2428	3886	948	2036	578	2211	1081	933	223	2634	6270	1299	2863	2303	3193	3378	1989	2904	3854	2992	4495	3688	2559	2824	2889	3771	659	1972	674	1977	1110	1480	648	3430	6503	2582	4563	2438	2652	4113	1692	2172
52	2465	4460	3415	3636	2246	2361	2479	2960	4062	940	1970	625	2090	832	750	372	2949	6214	1482	3198	2191	3178	3341	1937	2858	3440	3168	4297	3719	2666	2735	2981	4160	740	2097	654	2220	983	1300	573	2670	7186	2423	4532	2411	2876	4104	1573	2446
53	2350	4530	3477	3901	1851	2166	2362	2459	3793	1124	2028	630	2054	1025	787	308	2593	6197	1408	3228	1889	3227	3343	1856	2684	3445	3074	4412	3691	2655	2659	2898	3970	789	2107	698	2466	1073	1310	600	3005	6884	2653	4497	2420	2567	4477	1542	2383
54	2354	4861	3391	3478	1956	2201	2381	2694	3620	1073	2021	592	1967	915	958	334	2806	6352	1555	2955	2236	3293	3484	1710	2872	3519	2844	4548	3808	2431	2783	2927	3705	844	2098	798	2352	1037	1590	561	2917	7579	2588	4476	2542	2636	4397	1641	2343
55	2281	4428	3479	3577	2056	2046	2130	2776	4142	940	2007	613	2266	1131	1001	378	2982	6389	1415	3230	2076	3163	2984	1778	2772	3770	3130	4519	3678	2343	2491	3016	4082	829	1828	730	2508	1210	1540	688	2659	7217	2687	4565	2397	2705	3955	1606	2466
56	2482	4923	3346	3694	2430	2170	2426	2526	3721	816	1976	482	2210	1083	974	352	2865	6052	1408	3223	2088	3396	3267	1936	2680	3642	2837	4592	3892	2593	2720	2899	4085	882	2008	658	2464	1223	1405	650	2977	7475	2717	4445	2316	2757	4485	1274	2454
57	2409	4710	3592	3682	2210	1872	2237	2736	3815	1090	2117	805	2211	922	1021	231	2918	6332	1559	3154	2106	3303	3382	1883	2996	3380	2980	4090	3788	2775	2891	3194	3968	685	2102	668	2492	1231	1367	620	2828	7428	2587	4238	2556	2699	4146	1471	2372
58	2302	4480	3572	3805	2374	2195	2024	2884	3681	1131	2193	519	2141	826	1103	368	2547	6403	1544	3214	2163	3373	3328	1905	2831	3546	2886	4474	3419	2537	2781	3225	3911	909	1912	751	2496	1219	1308	707	2229	7480	2723	4436	2528	2568	4169	1489	2562
59	2343	4647	3195	3798	2362	2215	2292	2846	3719	1085	2201	597	2219	978	927	389	2720	6727	1284	3078	2049	3305	3283	1930	2863	3484	2845	4412	3987	2487	2650	3197	4043	865	1966	567	2423	1123	1577	541	2800	7218	2594	4432	2401	2754	4014	1657	2309
60	2399	4789	3184	3708	2304	2144	2329	3144	3932	1028	2134	634	2115	1087	850	459	2640	6731	1221	3536	1967	3277	3138	1802	2759	3412	2603	4530	3865	2530	2631	3140	4112	667	1949	708	2290	1196	1252	665	2962	7244	2491	4436	2399	2438	4226	1564	2414
61	2322	5010	3351	3473	2512	2079	2470	3147	3804	946	2064	605	2055	1046	1063	413	2877	6695	1462	3166	1890	3222	3081	1950	2954	3364	2757	4145	3615	2346	2689	3220	3986	846	2003	659	2264	1169	1319	824	2619	7171	2676	4379	2407	2561	4341	1471	2365
62	2237	5117	3402	3662	2398	2022	2181	3081	3896	978	2240	514	2312	856	856	305	2975	6627	1672	3113	1982	3280	3384	1841	2639	3443	2873	4086	3761	2311	2713	3110	3955	515	1822	619	2450	1074	1368	612	3020	7548	2612	4425	2459	2697	4106	1518	2198
63	2464	5074	3144	3342	2286	2194	2342	3107	3682	1163	2064	531	2092	985	1004	296	2955	6780	1363	3202	2028	3342	3245	1918	2629	3546	2973	4182	3842	2778	2812	3293	4233	437	1770	632	2182	1187	1338	628	2617	7404	2622	4831	2523	2741	4179	1581	2029
64	2767	4950	3170	3738	2364	2350	2082	2866	3947	1003	1926	595	2139	980	1081	386	2644	6626	1434	3079	2189	3327	3294	2170	2695	3390	2813	3872	3818	2454	2653	3249	3838	831	2044	687	2389	1116	1338	520	2525	7495	2730	4647	2547	2604	4042	1730	2143
65	2443	4963	3195	3640	2286	2296	2233	2751	3776	1217	2079	518	2139	1000	1187	344	3137	6678	1367	3386	1916	3357	3203	2022	2712	3611	2852	4112	3809	2503	2799	3204	4017	799	1931	692	2274	1000	1435	575	2949	7569	2511	4686	2424	2733	4068	1557	2390
66	2284	4699	3588	3370	2376	2097	2240	2964	3843	1277	2182	644	2129	1094	1097	365	2750	6320	1580	3625	2162	3330	3256	2046	2482	3407	2995	4401	3279	2591	2602	3064	4041	633	1976	650	2269	920	1482	698	2427	7524	2506	4726	2432	2573	4001	1614	2301
67	2444	4997	3225	3394	2538	2333	2362	3297	3921	1139	2124	567	2213	1122	908	251	2931	6587	1357	3255	1874	3413	3449	1972	2804	3604	2945	3856	3815	2503	2705	3440	4048	804	2012	687	2055	1182	1437	755	3014	7542	2609	4597	2150	2500	3985	1421	2276
68	2374	5148	3453	3590	2317	2223	2375	3072	4010	1079	2222	549	1929	959	919	526	2578	6614	1487	3230	1856	3422	2998	2102	2830	3313	2897	4188	3930	2512	2593	3321	4111	706	1907	845	2149	935	1570	593	3048	7233	2575	4374	2381	2487	4286	1424	2462
69	2133	5010	3294	3475	2360	2330	2221	3114	3837	1110	2046	713	2014	1067	1080	333	2917	6695	1449	3362	1950	3637	3154	2180	2676	3419	2852	4057	3971	2340	2994	3300	3930	896	1952	816	2114	1118	1598	631	2684	7171	2537	4524	2491	2677	4248	1529	2155
70	2364	5022	2904	3354	2360	2450	2145	3273	3895	1151	2034	501	2118	808	993	403	2697	6677	1290	3170	2010	3284	3104	2101	2579	3563	2788	4143	3747	2141	2443	3134	3878	972	1779	718	2350	1056	1556	595	2880	7649	2622	4491	2343	2561	3928	1559	2322
71	2231	4908	3450	3628	2784	2408	2458	3091	3666	1218	2131	725	2038	947	1123	440	2895	6714	1344	3122	1901	3578	3218	2254	2791	3401	2875	3947	4045	2675	2738	3150	3973	917	1758	738	2230	1038	1517	754	3075	7762	2420	4509	2455	2648	3902	1488	2097
72	2365	4900	3417	3474	2565	2263	2380	3155	3870	1189	2099	640	2442	1054	996	348	2703	6843	1452	2981	1972	3430	3324	2135	2678	3931	2850	3868	4016	2474	2882	3314	4263	778	1982	723	2402	1133	1326	656	3125	7597	2623	4389	2310	2558	3875	1656	2378
73	2369	4993	3660	3403	2306	2228	2408	3116	3916	1147	2119	516	2281	950	1039	386	2816	6488	1602	3429	2010	3506	3209	2008	2619	3765	2884	4106	3973	2631	2653	3236	4151	829	1956	867	2402	888	1473	502	3174	7108	2374	4548	2590	2851	4039	1441	2328
74	2521	4646	3466	3461	2252	2391	2279	3251	4186	1135	1981	682	2256	1080	1168	466	2845	6515	1534	3200	2141	3178	3106	2017	2828	3646	2634	3743	3718	2580	2571	3565	4037	778	1689	863	2329	1079	1488	578	2864	7047	2684	4378	2451	2608	3933	1366	2234
75	2741	4753	3364	3704	2484	2236	2312	3303	3899	1322	2050	757	2335	1078	1167	358	2833	6718	1424	3241	1770	3196	3173	2050	2489	3735	2775	3767	3221	2524	2808	3402	4009	885	1947	666	2035	1123	1520	622	2933	7133	2559	4556	2438	2855	3917	1487	2114
76	2535	4515	3545	3457	2356	2314	2217	3057	3631	1056	2048	840	2141	1124	1069	437	2850	6634	1404	3117	1885	3192	3140	1983	2536	3699	2683	3598	3923	2560	2607	3127	4092	668	1765	692	2285	968	1557	655	2946	6765	2497	4392	2199	2626	3988	1427	2466
77	2490	4732	3559	3443	2341	2623	2353	2911	3799	1130	2095	660	2121	882	1245	356	2756	6695	1344	3263	1871	3265	3036	2046	2528	3612	2704	3872	3852	2383	2582	3408	4254	783	1996	790	2207	990	1447	624	2710	7254	2410	4411	2360	2661	4064	1469	2215
78	2354	4448	2927	3373	2339	2576	2197	3230	3806	1204	2095	635	2230	1052	1195	280	2796	6661	1607	3080	2010	3284	3295	2080	2431	3770	2464	3715	3701	2320	2792	3097	4090	794	1771	801	2217	1087	1459	504	2609	7405	2567	4522	2374	2564	3985	1544	2279
79	2559	4808	3506	3358	2762	2463	2252	3155	3975	979	2212	707	2275	1185	1235	325	2868	6577	1242	3079	1890	3514	3309	2116	2351	3733	2865	3612	4102	2361	2630	3235	4110	803	1728	634	2182	1126	1510	518	2561	6579	2394	4725	2422	2609	4002	952	2402
80	2472	5131	3297	3620	2567	2342	2524	3284	4133	1221	2005	836	2295	959	1164	469	2933	6561	1504	3317	1910	3307	3219	2240	2552	3832	2619	3823	3976	2468	2604	3212	4159	911	1763	788	2281	1040	1395	580	2532	7214	2490	4658	2395	2431	3648	1498	2413
81	2538	4561	2998	3340	2588	2484	2402	3199	3840	1157	2173	530	2085	960	1141	434	2726	6747	1155	3374	1832	3323	2933	2244	2710	3985	2549	3418	3831	2603	2539	3028	4172	884	1675	847	2372	1160	1551	601	3031	7208	2414	4440	2544	2605	4264	1508	2314
82	2201	4580	3054	3635	2542	2176	2587	3200	3961	915	2123	690	2289	785	1130	335	2893	6332	1380	3440	1824	3233	3166	1945	2633	3949	2509	3535	3809	2515	2727	3152	4319	758	1861	848	2245	1108	1589	548	2995	7066	2608	4575	2426	2637	3858	1485	2328
83	2439	4592	3653	3663	2448	2481	2350	3426	3947	1062	2098	504	2109	967	1125	390	2694	6245	1469	3017	2016	3359	3142	2125	2463	3843	2631	3662	3385	2446	2597	3055	4077	711	1686	664	2202	1039	1541	407	2903	6644	2245	4521	2265	2624	3750	1536	2214
84	2566	4471	3362	3450	2070	2381	2084	3292	4272	1053	2182	697	2461	1032	1305	189	2777	6628	1747	3150	2079	3471	3154	2337	2321	4163	2812	3589	4045	2444	2687	3000	3888	934	1764	708	2155	1266	1711	716	2874	7190	2448	4550	2330	2686	4012	1622	2322
85	2659	4536	3410	3349	2386	2591	2326	3379	3531	995	1954	641	2166	1077	1228	460	2917	6459	1461	3187	1828	3510	2689	2036	2624	3940	2744	3755	4137	2416	2975	3218	3869	674	1960	663	2144	1150	1521	516	2897	6958	2317	4593	2253	2450	3969	1657	2233
86	2540	4434	3084	3770	2293	2596	2459	3539	3606	1185	2051	577	2477	1177	1125	324	2882	6423	1419	3317	2003	3527	2942	2188	2552	4029	2716	3352	3362	2240	2878	3038	3889	822	1701	834	2478	954	1421	467	2571	7013	2318	4666	2290	2569	3937	1586	2349
87	2323	4379	3536	3558	2642	2754	2202	3232	4000	1023	1972	745	2174	950	1311	406	2881	6350	1684	3422	1940	3307	2917	1755	2639	4093	2554	3334	4016	2525	2958	2985	3786	931	1810	822	2423	1150	1614	516	2824	7101	2412	4667	2133	2544	3825	1359	2324
88	2158	4563	3212	3618	2371	2087	2374	3088	4052	936	2155	743	2472	962	1080	357	2860	6548	1629	3138	2151	3361	2863	2130	2501	4075	2586	3422	3432	2557	2711	3262	4055	740	1884	637	2377	1341	1627	408	2880	7019	2527	4926	2228	2569	3832	1484	2318
89	2384	4528	3013	3635	2637	2672	2526	3456	3901	982	2080	633	2342	1141	1157	333	2863	6150	1663	3290	1763	3444	2702	2110	2488	4113	2580	3334	3451	2430	2914	3130	3834	883	1529	913	2312	1029	1669	523	2872	6810	2512	4852	2117	2496	3674	1698	2381
90	2282	4667	2943	3701	2415	2590	2290	3338	3869	966	1902	776	2448	1070	1184	481	2951	6319	1530	3179	2047	3424	2995	2144	2756	4204	2549	3238	3099	2436	2736	3093	3964	823	1743	761	2325	1085	1779	573	2764	6742	2284	4731	1930	2593	3844	1342	2338
91	2313	4663	2879	3588	2416	2637	2460	3274	3830	895	1836	646	2191	1067	1059	309	2992	6332	1680	3130	1867	3467	2856	2046	2705	4261	2699	3221	3365	2491	2678	3383	3835	640	1708	721	2335	1171	1786	368	2778	7186	2512	4856	2344	2491	3976	1686	2215
92	2267	4637	3126	3639	2332	2500	2335	3391	3908	1087	2108	688	2314	1238	1136	462	2780	6144	1562	3310	1950	3319	2804	2157	2594	4190	2548	3214	3458	2318	2721	3233	3741	905	1676	831	2196	1259	1685	467	2785	6689	2374	4740	2466	2590	3611	1558	2138
93	2215	4534	2879	3511	2310	2602	2389	3390	4032	929	1913	773	2430	1220	1359	302	2822	6521	1613	3295	2003	3588	3001	2012	2596	4310	2750	3292	3091	2348	3117	3081	3562	811	1686	693	2194	1216	1483	403	2693	7255	2545	4737	2266	2395	3540	1720	2373
94	2217	4438	3133	3371	2353	2519	2416	3245	3982	1030	2271	761	2455	1065	1101	413	2680	6320	1419	3068	1956	3383	3082	2071	2373	4164	2688	3370	3742	2379	2775	3333	3557	973	1623	656	2136	1105	1513	462	2928	6822	2497	4957	1980	2657	3849	1450	2360
95	2230	4638	2918	3715	2503	2737	2339	3362	3996	1040	1917	760	2680	1166	1329	433	2688	6232	1730	3325	2242	3440	2855	2192	2590	4218	2753	3251	4091	2514	2814	3288	3876	916	1466	720	2242	1190	1847	449	2791	6852	2545	4841	2147	2662	3670	1768	1940
96	2233	4579	3087	3621	2428	2600	2266	3490	3601	974	1967	835	2441	1091	1137	336	2890	6439	1384	3159	2167	3419	2783	2177	2676	4177	2536	3101	3125	2279	2597	3257	3668	656	1600	773	2142	1039	1617	465	2876	7153	2592	4852	2282	2346	3574	1459	2191
97	2347	4273	2976	3346	2456	2336	2396	3774	3946	900	2033	878	2404	1032	1234	386	2894	6387	1324	3501	1998	3130	3038	1965	2478	4341	2760	3107	3166	2586	2794	3116	3619	637	1422	718	2235	1209	1495	389	2833	6528	2468	5054	2369	2547	3782	1370	2318
98	2195	4278	2582	3642	2072	2570	2399	3432	4244	920	1815	769	2349	1196	1191	429	2864	6348	1385	3183	2182	3267	2674	2015	2407	4253	2641	3258	4097	2055	2854	3461	3697	749	1404	555	2270	1087	1670	499	2708	6611	2465	4918	2302	2585	3342	1458	2154
99	2200	4302	2910	3840	2601	2605	2244	3316	4015	932	1959	846	2266	985	1226	257	2642	6411	1497	3249	2299	3339	2799	1994	2555	4222	2850	3120	4131	2168	2724	3216	3542	896	1505	864	2285	1032	1637	370	2669	6343	2501	5094	2265	2613	3748	1333	2124
100	2237	4290	3051	3710	2387	2560	2278	3571	3849	934	1963	704	2435	992	1139	278	2693	6362	1561	3117	2354	3389	2881	1908	2485	4272	2630	3099	3903	2394	2887	3321	3672	656	1573	692	2120	1074	1601	572	2596	6889	2510	4891	2161	2591	3536	1480	2006
101	1998	4286	3136	3947	2400	2570	2408	3325	4241	784	1969	741	2549	957	1170	329	3274	6612	1378	3087	2145	3475	2838	2059	2586	4222	2737	3063	3278	2427	2763	3413	3361	804	1545	698	2147	1208	1462	447	2674	6715	2419	4814	2388	2619	3678	1638	2251
102	2234	4215	2854	3971	2183	2771	2679	3312	4335	926	2084	850	2240	1103	1346	437	2746	6161	1591	2899	2229	3541	2719	1951	2323	4296	2718	3110	3916	2418	2806	3345	3612	872	1380	804	2270	956	1616	458	2980	6673	2656	4864	2398	2328	3852	1421	2105
103	2267	4266	2985	3805	2581	2629	2382	3133	4340	946	1976	814	2557	1002	1252	211	2797	6481	1306	3061	2224	3473	2649	2068	2579	4014	2635	3005	4138	2532	2885	3204	3727	757	1205	723	2159	915	1426	394	2046	6777	2407	4796	2234	2371	3595	1549	1952
104	2226	4033	2838	3510	2439	2726	2603	3441	4076	968	1826	707	2541	1138	1364	484	2735	6387	1432	2715	2021	3153	2602	1914	2452	4221	2530	2786	4062	2476	2655	3223	3486	846	1330	522	2563	962	1451	502	2586	6890	2450	5005	2376	2734	3683	1449	2107
105	2143	4402	2834	3815	2539	2711	2497	3292	4477	894	1909	831	2228	1067	1296	406	2480	6706	1469	2857	2347	3334	2694	1861	2226	4096	2708	3043	3890	2202	2831	3358	3637	880	1394	669	2251	1085	1360	404	2546	6150	2462	4904	2374	2429	3620	1629	2163
106	2119	4050	2756	3526	2474	2364	2485	3203	4017	862	1799	895	2460	1005	1400	215	2783	6577	1508	2990	2235	3293	2801	2324	2300	4078	2479	3099	4143	2310	2643	3250	3726	950	1466	663	2259	1210	1516	420	2445	6582	2476	4722	2531	2554	3988	1455	2170
107	2118	4422	3287	3887	2556	2219	2590	3102	4324	875	1810	790	2318	1000	1453	427	2618	6753	1487	2968	2273	3401	2710	1914	2274	4296	2612	3023	4225	2200	2660	3376	3721	818	1416	707	2130	963	1649	374	2463	6785	2543	4480	2181	2460	3554	1664	2251
108	2059	4064	3090	3955	2524	2423	2327	3363	3826	922	2074	790	2322	980	1181	444	2857	6710	1450	3082	2289	3278	2429	1880	2502	4049	2563	2817	4166	2326	2619	3225	3709	868	1303	711	2157	1247	1579	403	2426	6360	2566	4574	2218	2355	3435	1443	2171
109	2167	4081	2858	3696	2621	2209	2367	3496	4155	985	1994	884	2391	1103	1256	278	2982	6550	1453	3094	2243	3067	2702	2086	2438	3943	2477	2824	3870	2284	2672	3342	3623	711	1409	797	2035	1044	1513	434	2450	6590	2543	4441	2441	2727	3621	1322	2172
110	2120	4432	2787	3868	2563	2364	2145	3165	4280	977	1926	959	2496	1197	1376	277	2825	6847	1437	3144	2140	3343	2494	2119	2390	3910	2662	2823	4049	2036	2826	2914	3480	848	1410	764	2171	1054	1489	460	2648	6080	2584	4745	2303	2696	3612	1531	2132
111	2071	4661	2992	3792	2151	2573	2331	3438	4337	1087	1682	862	2272	1253	1304	376	2882	6734	1556	3150	2174	3310	2610	2090	2302	4156	2582	2870	4086	1956	2861	2995	3738	918	1476	767	2193	1021	1459	362	2718	6646	2460	4881	2341	2748	3648	1617	2125
112	1919	4113	3170	3605	2264	2411	2332	3435	3965	947	1773	955	2245	1018	1206	263	2633	6733	1589	3204	2152	3331	2540	2083	2352	4198	2492	2855	3989	2152	2663	3170	3564	772	1437	767	2368	1074	1379	292	2466	6114	2449	4726	2305	2544	3579	1520	1958
113	2090	4035	2781	3715	2384	2075	2386	2983	3853	888	1924	879	2252	1042	1415	385	2983	6682	1623	3139	2113	3030	2595	2154	2339	4332	2379	2841	4060	2121	2770	2883	3702	544	1272	797	2343	840	1636	469	2255	6642	2336	4519	2084	2637	3643	1465	2238
114	1882	4312	2662	3758	2307	2204	2368	3103	4262	938	1733	1137	2378	1083	1353	387	2561	6486	1375	2967	2175	3354	2501	2068	2389	4152	2507	2780	3903	1754	2658	2946	3579	793	1334	700	2173	899	1437	529	2413	6415	2444	4558	2310	2713	3591	1290	2110
115	2025	4433	3155	3819	2289	2526	2263	3195	4049	864	1753	980	2377	1132	1418	306	2753	6675	1585	2891	2164	3208	2333	2183	2342	4307	2475	2838	3963	2241	2878	3006	3155	814	1380	605	2518	1038	1503	385	2390	6331	2505	4569	2024	2585	3436	1509	2009
116	2020	4388	2850	3594	2426	2117	2234	3254	4511	932	1827	892	2425	1057	1369	432	2707	6981	1338	3094	2112	3149	2607	2076	2474	3989	2504	2702	4254	2378	2717	3267	3412	837	946	890	2182	1143	1456	403	2494	6738	2475	4565	2292	2713	3374	1459	2075
117	1934	4190	2831	3976	2514	2529	2383	3391	4144	964	1793	1055	2470	910	1324	313	2543	6820	1723	3000	2154	3285	2790	2058	2229	4089	2476	2632	3148	1993	2789	3123	3437	792	1068	786	2419	1040	1413	382	2383	6621	2625	4517	2239	2660	3501	1250	2061
118	2030	4463	2771	3644	2487	2267	2313	3371	4234	956	1808	847	2463	1140	1322	314	2576	7101	1571	3042	2344	3242	2671	2424	2394	4292	2348	2790	4090	2196	2858	3309	3540	946	1553	571	2422	1152	1355	515	2609	6366	2599	4559	2268	2592	3541	1440	2138
119	1936	4373	2831	3693	2579	2314	2454	3033	4358	924	1718	1084	2352	1049	1252	413	2804	6791	1610	2869	2154	3156	2556	2291	2180	4368	2517	2643	3330	2072	2930	3205	3467	915	1545	889	2586	1099	1464	422	2423	6207	2406	4468	2224	2604	3395	1441	2110
120	2037	4402	2790	3849	2640	2456	2493	3098	4462	849	1750	894	2364	913	1383	362	2467	6937	1422	2846	2156	3332	2598	1998	2071	4452	2517	2745	3831	2098	2508	3143	3697	871	1400	785	2278	1090	1410	479	2378	6266	2598	4528	2311	2570	3487	1416	2016
121	1978	4236	2799	3695	2476	2386	2438	3365	4246	993	1772	963	2678	1136	1599	427	2530	6572	1553	3100	2211	3282	2598	2413	2378	4146	2394	2805	3926	2129	3047	3266	3465	612	1263	683	2656	1211	1453	419	2452	6371	2398	4505	2417	2598	3525	1684	2043
122	1976	4379	2830	3943	2610	2323	2524	3036	4272	1004	1731	1031	2302	1172	1429	321	2400	6962	1481	2946	2062	3385	2752	2160	2444	4370	2518	2644	3867	2178	2829	3153	3666	872	1467	598	2314	1086	1418	425	2408	6734	2435	4462	2099	2535	3432	1542	2088
123	1986	4417	2744	3991	2385	2292	2562	3133	4440	924	1866	992	2354	1143	1260	398	2474	6861	1398	3193	2063	3154	2444	2287	2559	4285	2477	2535	3877	1953	2941	3368	2953	924	1395	970	2438	1006	1353	492	2336	6274	2619	4228	2065	2590	3531	1697	2012
124	1873	4158	2928	3726	2418	2422	2110	2957	4242	780	1967	893	2200	1209	1334	424	2565	6768	1502	3067	2234	3153	2600	2308	2323	4621	2439	2618	3909	1951	2908	3388	3057	980	1402	719	2310	1213	1323	354	2492	6293	2656	4325	2297	2540	3530	1505	1776
125	2025	4294	2757	3791	2385	2125	2304	3150	4400	981	1591	938	2602	1266	1281	380	2726	6958	1445	2924	2037	3042	2700	2311	2323	4488	2612	2702	3887	2378	2924	3335	3503	774	1613	723	2333	1145	1391	392	2369	6424	2666	4452	1971	2541	3818	1623	1768
126	1936	4349	2775	3596	2789	2265	2461	2895	4153	950	1931	933	2359	857	1396	506	2504	6886	1455	2827	2130	3058	2627	2251	2245	4394	2481	2885	3877	2245	3004	3172	2895	700	1375	816	2297	1108	1292	297	2361	6376	2309	4217	2183	2658	3704	1309	1763
127	1949	4317	2725	3602	2568	2280	2420	2933	4266	978	1701	877	2577	1204	1403	370	2644	6721	1422	2940	2035	3022	2840	2476	2113	4602	2609	2755	3516	2269	2798	3650	3339	825	1393	801	2201	1136	1472	335	2359	6081	2465	4036	2015	2588	3651	1750	2129
128	1946	4315	2703	3744	2977	2149	2251	2985	4203	972	1900	1069	2447	1145	1372	322	2781	6648	1432	3143	1995	3343	2618	2375	2384	4471	2896	2942	3386	2278	2826	3481	3431	860	1488	693	2408	1163	1569	324	2432	6173	2539	4265	2193	2738	3407	1567	2182
129	1856	4590	3303	3776	2811	2196	2050	2824	4600	951	1779	1123	2438	1087	1332	367	2525	6727	1363	3010	2014	3297	2759	2448	2233	4427	2538	2708	3309	2251	2983	3303	3487	976	1068	673	2454	1099	1451	408	2338	6295	2214	4367	2147	2466	3488	1384	2083
130	1876	4421	3159	3862	2806	2140	2318	2925	4224	833	1658	906	2265	1067	1460	335	2300	6769	1481	3058	2104	3137	2807	2291	2363	4666	2549	2687	3392	1925	2829	3396	3115	942	1453	973	2353	1240	1162	448	2306	5951	2231	4340	2100	2726	3536	1645	2056
131	1850	4283	3041	3662	2760	2293	2308	3008	3821	898	1556	996	2205	941	1378	395	2458	6979	1636	2939	2029	3124	2852	2424	2158	4594	2657	2636	3275	2092	2971	3549	3157	726	1446	885	2442	1167	1346	393	2208	6268	2641	4040	2179	2792	3555	1296	1944
132	1891	4474	2767	3642	2960	1901	2377	2728	4176	1011	1648	830	2194	1268	1444	367	2656	6809	1569	3098	2058	2892	2494	2122	2272	4460	2758	2734	3110	2137	2999	3755	3129	1002	1404	827	2447	1139	1321	511	2280	6570	2323	4096	2143	2656	3220	1362	2068
133	2252	4431	2637	3511	2729	1942	2339	2882	4560	1059	1938	990	2442	1094	1402	348	2392	6952	1437	3096	2263	3321	2548	2353	2180	4292	2589	2763	3358	2137	2781	3368	3525	841	1451	855	2509	1103	1406	371	2216	6437	2305	4130	2219	2494	3099	1690	2047
134	2072	4608	2715	3621	2867	2132	2261	2706	4119	859	1962	864	2467	1152	1362	285	2599	6712	1550	3000	2190	3297	2788	2185	2110	4526	2618	2695	3080	2015	2910	3626	3513	746	1429	693	2458	1119	1412	413	2211	6402	2443	4275	2117	2772	3457	1566	1991
135	1998	4234	2641	3687	2715	2128	2350	2648	4040	929	1882	866	2303	1074	1549	325	2458	6890	1489	3107	2202	3184	2621	2129	2364	4672	2671	2718	3707	2312	2914	3411	3442	734	1576	761	2194	1224	1325	435	2245	6503	2165	4197	2241	2639	3370	1413	1929
136	1832	4389	3350	3845	2817	2063	2401	2913	4233	875	1663	842	2216	1228	1405	405	2481	6506	1540	2982	2332	3213	2662	2188	2364	4616	2971	2752	3038	2281	2905	3438	3393	883	1722	923	2346	1186	1304	476	2516	6249	2281	4464	2345	2625	3459	1655	2089
137	2175	4155	3243	3715	2590	1904	2198	2753	4304	1076	1897	908	2455	1161	1457	391	2148	6567	1473	2844	1907	3171	2687	2296	2246	4563	2742	2800	3020	2196	2837	3564	3389	755	1602	653	2533	1088	1369	428	2439	6331	2488	4298	2056	2607	3258	1606	2053
138	1963	4391	3237	3801	2880	2204	2276	2770	4478	971	1588	998	2114	1208	1614	353	2630	6724	1377	3099	1872	3126	3009	1890	2140	5162	2783	2623	3016	1944	3041	3605	3575	809	1409	899	2456	1097	1233	499	2141	6446	2370	4413	2115	2639	3269	1401	2187
139	2011	4423	3317	3876	2827	2130	2349	2766	4554	845	1696	937	2271	1135	1473	175	2501	6673	1398	3099	2030	3150	2790	2019	2260	5023	3054	2745	2931	2065	2837	3639	3446	808	1549	831	2239	1152	1343	513	2141	6362	2219	4366	2047	2500	3182	1461	2124
140	1918	4379	3322	3907	2477	2110	2405	2670	4514	1044	1757	925	2335	1271	1648	387	2482	6711	1536	3146	2104	2860	2833	1956	2308	4925	2750	2832	3121	1856	3120	3522	3374	787	1450	901	2455	1182	1460	409	2293	6326	2435	4250	2123	2546	3210	1619	2196
141	2225	4196	2818	3782	2692	2087	2429	2521	4425	985	1827	780	2196	1020	1639	326	2702	6711	1415	3282	2088	3131	3070	2042	2325	5114	2666	2748	2642	2255	3033	3407	2982	837	1365	1021	2209	1137	1523	573	2203	6394	2231	4540	2112	2661	3377	1434	2095
142	2058	4497	2791	3813	2811	2038	2405	2595	4326	1084	1604	694	2263	1099	1334	258	2535	6749	1267	3153	2067	2949	2756	1925	2434	4923	2917	2693	3286	2128	2914	3310	3630	860	1570	951	2266	1034	1202	321	2698	6415	2377	4242	2067	2711	3446	1588	1996
143	2032	4373	3261	3912	2818	1978	2376	2839	4462	1002	1809	892	2374	1149	1311	267	2530	6227	1374	3009	2039	2987	3078	1963	2467	5059	2645	2427	3217	2159	3144	3468	3249	812	1400	925	2681	1072	1362	425	2225	6102	2512	4648	1986	2575	3289	1387	1934
144	1969	4305	2831	3831	2894	2184	2589	2803	4610	918	1601	908	2292	1015	1379	380	2565	6541	1262	3181	2061	3012	3018	2089	2355	4995	2810	2603	2581	2237	3030	3290	3625	844	1262	877	2443	1198	1374	330	1926	6482	2354	4500	2108	2546	3472	1433	2134
145	2029	4029	3022	3823	2448	2088	2473	2724	4808	1038	1856	970	2527	1081	1431	301	2649	6465	1527	3180	2035	2878	2896	1986	2369	4818	2634	2724	2416	2351	3075	3361	3632	730	1412	862	2122	1027	1408	456	2982	6295	2291	4385	2046	2570	3188	1341	2093
146	1857	4147	2724	3670	2769	2003	2570	2877	4734	946	1750	957	2439	1085	1423	372	2533	6683	1437	3092	1945	2821	2924	1999	2419	4939	2778	2670	2707	2205	3070	3325	3475	532	1444	909	2407	1074	1465	370	2806	6123	2277	4160	2128	2586	3433	1450	2146
147	2030	4061	2954	3838	3014	2273	2390	2409	4311	956	1524	829	2498	1073	1289	224	2679	6205	1491	2997	1911	2916	2756	2087	2382	5161	2907	2755	3127	2119	3078	3170	3808	876	1306	885	2607	1009	1570	402	2330	6316	2453	4407	2022	2548	3031	1336	2126
148	2020	4117	2688	3908	2648	1914	2525	2704	5024	935	1730	976	2345	1085	1324	361	2692	6481	1558	3320	1925	3283	3131	2116	2326	5042	2744	2664	2803	2367	3239	3289	3644	890	1211	777	2457	1108	1451	543	2136	6563	2442	4461	2027	2489	3350	1495	2327
149	1831	4003	2535	3418	2545	1786	2393	2515	4594	1022	1710	963	2438	922	1437	392	2313	6573	1528	3306	2000	3052	3058	2270	2468	5173	2870	2689	2758	2074	3051	3334	4090	873	1060	887	2675	1157	1565	506	1858	6072	2466	4492	2192	2510	3512	1739	2219
150	1864	3817	2941	3626	2757	2027	2250	2520	4731	963	1531	941	2384	1069	1427	437	2796	6439	1472	3590	1920	3135	3045	2176	2620	4900	2737	2690	2596	2181	3248	3171	3918	960	1433	969	2488	1142	1313	597	2885	6120	2435	4314	2225	2524	3386	1492	2216
151	1928	3794	2893	3752	2630	1763	2308	2557	4643	886	1620	741	2208	971	1447	252	2554	6223	1668	3296	1862	3146	3150	2076	2706	5223	2762	2702	2558	2531	3048	3166	3662	905	1160	981	2450	1179	1569	471	1974	6014	2281	4287	1861	2626	3349	1529	2014
152	2033	3956	2733	3796	2691	1890	2397	2763	4854	938	1619	829	2541	1137	1381	297	2495	6815	1489	3099	1966	3100	2934	2231	2355	5209	2755	2687	2644	1935	2989	3151	3820	698	1485	902	2660	1249	1545	439	3052	6323	2320	4206	1889	2368	3338	1562	2041
153	1945	3642	2661	3631	2862	1749	2469	2628	5042	964	1564	863	2547	1154	1526	385	2684	6247	1349	3076	2008	3120	3197	2046	2566	5180	2673	2757	2964	1814	3219	3171	4001	742	1403	946	2643	1114	1414	345	2686	6309	2426	4480	2138	2487	3578	1639	2109
154	2040	3626	2729	3771	2826	1712	2479	2500	4897	951	1627	1096	2476	1005	1511	430	2396	6527	1358	3135	1653	3017	2890	2298	2682	5321	2639	2678	2614	2136	2956	3340	4059	858	1347	983	2608	1092	1457	348	2757	6269	2343	4301	2080	2319	3312	1616	2040
155	2103	3632	2883	3589	2664	1821	2081	2619	5174	845	1445	867	2483	947	1509	340	2585	6301	1321	2926	2068	3051	2958	2108	2497	5365	2775	2858	2705	2057	3230	3439	3905	791	1354	1154	2476	1238	1625	527	2900	6111	2443	4376	2110	2545	3517	1370	2142
156	1926	3517	2916	3861	2677	1708	2349	2801	5491	942	1374	1059	2450	1103	1505	280	2431	6266	1431	3461	1765	3141	3212	2259	2397	5227	3089	2709	2645	2250	2930	3194	3963	756	1183	1031	2508	1181	1610	495	2784	6230	2431	4598	2036	2424	3526	1600	1950
157	1984	3626	2973	3938	2893	1929	2632	2766	5286	957	1441	944	2846	1005	1452	325	2391	6153	1478	3186	1983	2922	3321	2245	2570	5280	3048	2681	2734	2128	2904	3428	3907	852	1303	1068	2343	1059	1435	422	2734	6432	2396	4422	2110	2596	3386	1622	2055
158	1942	3450	2745	3958	2492	1750	2492	2513	5068	951	1406	1006	2711	1224	1411	329	2303	6231	1517	3049	1850	3062	3293	2156	2453	5333	2757	2676	2733	1860	3053	3335	3803	825	1318	1197	2484	1158	1621	491	2869	6364	2486	4658	2050	2422	3269	1485	2011
159	1935	3428	2911	3849	2706	1859	2128	2767	5317	958	1366	1183	2477	1032	1537	269	2518	6439	1422	3293	1933	3034	3340	2162	2555	5262	2838	2729	2588	1877	3089	3454	4052	913	1370	959	2423	1137	1382	671	2917	6294	2282	4450	1858	2483	3354	1351	1939
160	2024	3403	2995	3797	2950	1878	2515	2514	5169	871	1512	960	2380	957	1358	233	2601	6437	1408	3224	1824	3119	3544	2235	2527	5456	2883	2726	2544	2080	2958	3277	3853	985	1404	872	2642	1096	1505	507	2877	6669	2281	4328	1979	2452	3313	1574	1948
161	2090	3465	2874	4104	2462	1814	2612	2499	5387	914	1566	1122	2346	1214	1691	333	2679	6077	1545	3377	1836	3075	3102	2120	2649	5206	2957	2661	2300	2063	2945	3448	4027	694	1326	1135	2136	1093	1442	399	2957	6393	2214	4722	1962	2423	3401	1777	2126
162	2084	3662	2922	3695	2766	1932	2643	2407	5066	849	1346	1016	2575	1137	1513	329	2530	6252	1502	2998	1961	2961	3249	2162	2682	5048	2872	2765	2271	1853	3106	3314	3781	760	1432	905	2711	1054	1502	411	2679	6239	2173	4687	2094	2413	3090	1405	2057
163	2034	3012	2919	3996	2845	1510	2401	2553	5380	881	1340	982	2678	1198	1419	237	2710	6241	1354	3328	1721	3139	3313	2201	2471	5227	2964	2778	2161	1978	2903	3723	3712	654	1178	935	2470	1310	1562	636	2057	6158	2276	4598	1894	2396	3199	1463	2287
164	1878	3316	2889	3905	2935	1583	2421	2269	5142	866	1356	1015	2619	1198	1507	273	2608	6378	1481	3063	1699	3003	3145	2285	2579	5221	2945	2818	2417	1939	3059	3298	3986	783	1298	1115	2446	976	1632	259	2191	6183	2138	4667	1955	2502	3187	1320	2227
165	1930	3244	3002	3809	2551	1686	2420	2471	5105	817	1308	1158	2760	1123	1713	175	2645	6482	1348	3208	1771	3079	3297	2280	2427	5265	3012	2819	2477	1969	2838	3454	3895	738	1287	881	2478	1085	1506	373	2778	6005	2018	4545	2118	2350	3257	1559	2055
166	1773	3074	2964	3823	2656	1713	2280	2607	5446	1023	1436	879	2503	1102	1679	382	2574	6378	1275	3055	1751	3218	3338	2307	2413	5346	2820	2545	2378	1814	3028	3791	4023	984	1395	909	2468	1247	1720	587	2624	6193	2150	4682	1720	2142	3394	1601	2358
167	2140	3512	2929	3834	2755	1826	2487	2487	5632	968	1488	1165	2695	1168	1476	323	2545	6288	1307	3110	1730	3214	3340	2384	2436	5381	2949	2896	2090	2045	3101	3557	3998	845	1269	937	2377	1133	1512	505	2748	5972	1893	4501	1809	2244	3553	1574	2038
168	1925	3339	3181	3726	2469	1708	2605	2403	5546	784	1472	960	2600	1134	1618	336	2622	6275	1389	3359	1899	2908	3494	2202	2544	5182	2945	2758	2260	1866	3039	3299	3811	861	1406	904	2613	932	1501	579	2772	6245	2290	4476	1781	2252	3254	1510	2149
169	2019	3101	2990	3651	2838	1484	2584	2460	5443	871	1550	940	2462	1147	1666	383	2889	6585	1653	3441	1643	3051	3456	2234	2517	5226	3114	2770	2253	1937	2878	3195	4187	739	1312	882	2656	1187	1502	683	2014	6439	2160	4548	1871	2158	3418	1728	2153
170	2020	3309	2891	3726	2543	1686	2409	2663	5157	820	1453	938	2553	957	1680	314	2479	6257	1365	3262	1666	2747	3213	2236	2585	5343	2906	2721	2141	1938	2975	3680	3867	1067	1234	974	2281	1337	1396	594	2851	5886	2064	4680	1723	2244	3393	1716	2043
171	1857	3236	3129	3798	2738	1893	2579	2351	5440	787	1635	1072	2541	1046	1715	319	2624	6184	1128	3257	1533	2903	3328	2031	2183	5248	2751	2866	2219	2015	2800	3316	3768	905	1305	978	2552	1248	1494	529	2842	6062	2117	4603	1949	2176	3465	1288	1972
172	1956	3066	3181	3795	2742	1591	2554	2371	5858	810	1594	969	2364	1270	1605	194	2642	6120	1113	3278	1629	2998	3289	2095	2401	5130	2943	2745	2100	1828	2934	3812	3657	881	1393	1003	2581	1163	1653	599	2288	6060	1971	4371	1997	2202	3470	1341	2184
173	2019	3289	2994	3464	2519	1714	2250	2326	5850	846	1554	1084	2446	1004	1614	229	2674	6385	1490	3341	1598	2868	3549	1911	2372	5174	2922	2575	2439	1862	2993	3475	3875	639	1322	930	2482	884	1484	575	2713	5910	2207	4591	1894	2523	3594	1566	2166
174	1997	3250	3147	3830	2632	1608	2395	2438	5821	809	1636	1050	2491	1080	1625	284	2615	6201	1223	3091	1886	2706	3456	1996	2459	5082	3016	2707	2222	1803	2910	3520	3700	813	1322	847	2491	1220	1654	690	2937	5927	2137	4939	1702	2312	3372	1344	2160
175	1781	3344	3103	3832	2694	1696	2503	2764	5779	749	1553	1073	2564	1122	1571	425	2451	6320	1178	3383	1792	2595	3290	2132	2462	4921	2852	2677	2050	1885	3191	3521	3960	692	1112	925	2397	1230	1505	629	2726	6114	1867	4262	1912	2249	3492	1449	2178
176	1837	3177	3080	3903	2660	1732	2528	2450	5570	915	1607	1138	2468	1046	1514	234	2702	5967	1312	3164	1627	2689	3452	1988	2425	4959	2889	2655	1935	1569	2807	3302	3909	530	1557	981	2476	1061	1548	499	2668	6081	2083	4452	1924	2164	3188	1382	2086
177	1893	3284	2961	3948	2376	1658	2456	2306	5920	858	1586	1227	2587	1043	1605	257	2559	6171	1093	3440	1767	2799	3566	2133	2450	4689	3152	2661	2314	1995	2831	3666	3997	877	1417	1052	2232	1227	1517	558	2778	6117	2157	4639	1698	2238	3402	1656	2104
178	1761	3183	3066	3746	2697	1435	2401	2578	5562	971	1594	985	2428	1086	1437	342	2488	6094	1256	3580	1629	2614	3570	2208	2366	5021	3383	2539	2222	1900	3186	3494	3732	840	1509	1048	2296	1222	1706	612	2472	5730	1935	4132	1715	2139	3391	1411	2133
179	1840	3238	3010	3811	2947	1705	2383	2443	5591	853	1460	1249	2543	896	1629	266	2680	6362	1241	3205	1775	2763	3681	2069	2421	4864	3118	2523	2030	1820	2764	3612	3734	911	1456	867	2267	1022	1422	679	2714	5970	2303	4417	1960	2214	3235	1484	2308
180	1773	3130	3359	3975	2762	1820	2521	2577	5571	914	1736	1174	2571	1095	1569	252	2595	6435	1171	3342	1396	2737	3505	2049	2374	4735	3110	2144	2540	1836	2995	3500	3820	801	1487	822	2686	1097	1477	642	2649	6201	1982	4628	1844	2469	3388	1582	2101
181	1757	3154	3267	3941	2827	1516	2422	2314	5674	763	1632	1117	2366	1048	1678	228	2637	6068	1262	3245	1669	2609	3425	2038	2398	4741	3223	2440	2222	1981	2914	3225	3757	655	1474	899	2417	1046	1407	592	2618	5755	2119	4267	1816	2316	3333	1526	2136
182	1751	3043	3234	3804	2698	1656	2473	2636	5789	718	1523	986	2724	1156	1584	243	2403	6453	1134	3567	1706	2443	3727	1964	2410	4945	3039	2258	2249	1819	3003	3257	3477	939	1328	894	2739	1028	1446	513	2771	5683	2098	4713	1922	2169	3224	1338	2035
183	1833	3220	3167	4188	2597	1725	2497	2225	5794	831	1773	1014	2547	1032	1733	360	2525	6109	1331	3463	1676	2432	3969	1928	2545	4863	3135	2530	2467	1813	3004	3381	3791	934	1548	832	2551	1095	1309	573	2379	5959	2205	4656	1829	2098	3316	1561	2085
184	1657	3343	3469	3796	2709	1603	2417	2355	5572	909	1853	1066	2643	963	1590	311	2409	5927	1166	3426	1659	2613	3594	1971	2677	4667	3306	2504	2280	2089	2787	3577	3736	646	1471	911	2440	1213	1408	542	2087	5793	2159	4300	2012	2317	3338	1553	2255
185	1849	2944	3221	3983	2862	1403	2503	2397	5771	665	1617	1168	2419	1142	1627	352	2376	5872	1088	3367	1722	2517	3850	2030	2484	4570	3249	2404	2172	1881	2847	3410	3947	938	1528	1049	2314	1185	1500	540	2630	5606	2092	4534	1813	2145	3416	1459	2264
186	1677	3080	3359	3774	3023	1526	2482	2187	5942	760	1749	1217	2638	1212	1505	295	2372	5998	1190	3533	1559	2623	3729	2033	2592	4898	3243	2453	2548	2146	2997	3668	3996	903	1460	882	2201	1115	1461	612	2638	5786	1922	4499	1917	2149	3347	1579	2210
187	1768	3155	3285	4125	2919	1397	2327	2457	5831	815	1693	1077	2725	1288	1522	246	2428	5880	1326	3608	1464	2311	3716	2060	2310	5022	3114	2505	2442	2382	2586	3375	3946	959	1358	982	2571	995	1485	535	2674	5552	2073	4452	1883	2150	3219	1544	2211
188	1610	3075	3484	3991	2796	1862	2369	2452	6416	818	1634	1225	2702	1255	1632	439	2534	6117	836	3348	1601	2479	3684	2080	2383	4923	3233	2262	2421	2073	3048	3441	3989	763	1328	912	2744	1102	1439	634	2912	5578	2063	4966	1850	2146	3095	1664	2241
189	1871	3241	3337	4068	2614	1766	2412	2334	5818	670	1784	1104	2562	1042	1579	443	2542	5944	1165	3651	1565	2460	3909	2158	2552	4722	3439	2211	2505	2050	2985	3255	4082	935	1391	991	2375	1030	1230	518	2522	5474	1785	4809	1890	2143	3363	1497	2137
190	1792	3002	3261	3752	2795	1778	2579	2027	5583	757	1627	1319	2836	1280	1883	302	2361	5738	1350	3519	1793	2582	3793	2094	2479	4901	3357	2494	2549	2102	2919	3455	3926	730	1491	891	2776	1255	1463	493	2838	5631	1852	4449	1821	2231	3201	1447	2118
191	1665	3225	3296	4275	2993	1798	2381	2182	5771	781	1617	1211	2719	1182	1595	333	2667	5989	1261	3627	1391	2412	3970	2162	2543	4763	3244	2571	2489	2070	3010	3391	3819	896	1645	1013	2378	1131	1404	703	2548	5433	1769	4621	2033	2252	3465	1755	2129
192	1817	3064	3332	4082	2907	1629	2434	2267	5859	764	1822	1248	2446	1183	1620	358	2484	5880	1114	3513	1713	2493	3961	2226	2321	4985	3035	2295	2310	2195	2695	3137	3794	957	1514	919	2600	1106	1384	652	2625	5633	2114	4649	1796	2199	3381	1563	2136
193	1714	2958	3347	3943	2955	1753	2510	2404	5834	866	1757	1367	2388	1121	1425	261	2632	5972	1180	3482	1663	2369	3970	2450	2756	5037	3400	2467	2468	2297	3021	3477	3809	945	1466	1068	2733	1206	1452	541	2754	5197	1797	4501	1957	2095	3078	1687	1762
194	1745	3124	3512	4161	3120	1716	2488	2208	5862	871	1711	1042	2494	1099	1620	374	2685	5726	1080	3518	1671	2315	3740	2085	2562	4951	3101	2433	2300	2161	2838	3081	3645	953	1543	1114	2742	1199	1591	591	2419	5288	2115	4470	2009	2309	3226	1605	2220
195	1601	2966	3271	3797	2930	1857	2343	2532	6037	877	1796	1146	2611	1119	1476	405	2534	5659	1152	3520	1571	2271	3776	2203	2593	4894	2977	2384	2396	1976	2884	3087	3827	853	1348	1079	2502	1142	1524	756	2471	5212	1942	4786	1863	2067	3039	1645	1965
196	1788	3168	3184	3782	3182	1739	2459	2408	5906	743	1850	1018	2650	1304	1412	362	2408	5522	961	3501	1690	2339	3822	2276	2565	4771	3303	2497	2408	2200	2915	3103	3735	977	1472	1156	2847	952	1404	678	2742	5216	1947	4708	1949	2086	3370	1688	2198
197	1473	3023	3268	3623	3156	1555	2652	2436	5981	694	1878	1146	2564	1140	1555	366	2465	5574	1097	3491	1568	2181	3861	2051	2699	5058	3280	2278	2413	2191	2649	3159	3792	1083	1317	1023	2726	1081	1324	651	2693	5125	1723	4799	1811	2282	3025	1712	2220
198	1668	3328	3253	3708	2827	1814	2436	2490	5913	707	1551	1203	2531	1450	1491	283	2668	5819	1269	3672	1559	2219	3832	2287	2527	5038	3515	2559	2303	2126	2829	3065	3874	1006	1604	1000	2706	1140	1429	572	2544	5048	1828	4477	1810	2263	2938	1649	2134
199	1607	3465	3558	4043	3104	1800	2518	2287	6039	806	1661	1170	2663	1229	1553	356	2666	5742	997	3483	1421	2235	3783	2309	2527	5181	3209	2430	2350	2107	2757	3152	3774	837	1578	954	2378	1266	1605	587	2710	5167	1707	4905	1883	2232	3181	1604	2195
200	1491	3394	3355	3551	2911	1693	2543	2360	5767	776	1858	1164	2684	1331	1492	415	2402	5666	1142	3537	1368	2231	3782	2311	2596	4845	3391	2487	2376	2210	3122	3053	3834	1026	1433	1046	2446	1085	1382	494	2645	5080	1718	4792	1805	2321	3010	1463	2199
201	1682	3770	3416	3767	2682	1606	2527	2462	6061	695	1851	1233	2312	1268	1383	390	2476	5764	1285	3474	1407	2174	3742	2195	2661	4939	3036	2652	2588	2136	2617	3047	3991	923	1637	994	2487	989	1623	678	2556	4971	2038	4801	1833	2317	3060	1565	2161
202	1619	3745	3355	3925	2676	1597	2404	2458	5914	860	1509	1109	2667	1173	1588	336	2605	5925	1112	3605	1421	2303	3876	2409	2474	5155	3234	2309	2361	2226	2830	3052	3964	832	1484	1000	2588	1129	1422	758	2477	5235	1802	4792	1721	2314	2889	1542	2167
203	1672	3910	3322	3631	3092	1651	2566	2599	6184	999	1715	989	2858	1257	1382	264	2491	5990	976	3426	1465	2272	3802	2176	2614	4878	3366	2597	2612	2012	2775	3074	3633	965	1513	988	2413	1205	1595	677	2532	5051	1890	4769	1806	2366	3029	1509	2185
204	1707	3577	3631	4066	2942	1804	2730	2728	6027	744	1597	1167	2521	1211	1459	262	2543	5849	1084	3306	1666	2215	4090	2194	2676	5006	3538	2585	2409	2197	2990	3051	3780	860	1345	1023	2557	1002	1404	636	1910	4994	1954	4429	1758	2348	3023	1701	2212
205	1706	3647	3288	3910	2915	1811	2480	2593	5862	846	1655	1173	2748	1331	1400	345	2447	5745	1077	3481	1535	2163	3940	2302	2595	5058	3166	2505	2340	2310	2724	2869	3906	956	1313	1060	2341	1101	1508	561	2417	5222	1807	4458	1885	2330	2814	1378	2278
206	1663	3488	3649	3489	2884	1652	2618	2757	5832	833	1674	1378	2780	1264	1478	236	2473	5827	1121	3477	1610	1894	3838	2450	2441	4890	3310	2421	2137	2225	2757	2920	4079	1005	1410	894	2639	1343	1436	612	2391	5241	1943	4683	1772	2337	2849	1634	2213
207	1483	3716	3449	3845	2914	1651	2492	2782	5735	844	1770	1212	2736	1134	1582	388	2472	5695	871	3228	1588	2113	3912	2387	2778	4876	3120	2670	2050	2145	3168	2983	3924	744	1422	963	2521	1065	1204	581	2357	5223	1874	4684	1723	2498	2999	1455	2278
208	1764	3498	3603	4078	3135	1609	2461	2823	6044	826	1513	1161	2332	1148	1538	368	2710	5647	1212	3373	1385	2071	3896	2391	2595	5015	3200	2564	2254	2215	3044	2751	3809	914	1462	1074	2684	1194	1504	527	1924	4879	1612	4613	1675	2256	3123	1473	2187
209	1769	3635	3178	3814	2936	1532	2588	2942	5505	944	1652	1277	2810	1076	1381	197	2481	5877	921	3332	1666	2197	4102	2329	2389	4850	3481	2615	2309	2140	2959	2766	3849	713	1513	1152	2742	1381	1542	656	2452	5065	2017	4769	1503	2545	2926	1483	2238
210	1868	3925	3519	3689	3087	1768	2557	2784	5912	932	1554	991	2634	1073	1366	379	2352	5653	1067	3340	1541	2003	3903	2493	2363	5154	3509	2434	2227	2133	3120	2918	3869	881	1357	1159	2469	1104	1543	636	1804	4860	1970	5013	1600	2181	2995	1579	2274
211	1638	3767	3432	3790	2959	1640	2587	2711	6194	872	1659	1122	2822	1261	1397	241	2526	5609	1017	3267	1395	2039	4140	2503	2590	5359	3555	2594	2178	2047	3011	2841	3842	721	1398	1219	2251	1027	1330	589	2502	5102	1804	4650	1465	2190	3059	1519	2105
212	1893	3936	3181	3590	2962	1629	2525	2831	5884	880	1676	1147	2690	1189	1392	321	2810	5858	1139	3353	1425	2252	4023	2589	2350	5119	3389	2669	2088	2147	3094	2867	3882	802	1281	1186	2318	1222	1392	605	2611	5276	2004	4612	1839	2246	2828	1619	2157
213	1817	3917	3481	4469	2959	1502	2657	2829	5646	900	1526	1243	2591	1402	1497	192	2538	5443	1036	3438	1668	2455	3770	2409	2271	4666	3373	2729	2576	2222	2869	2690	4137	847	1269	1036	2486	1246	1348	670	1976	5184	1931	4716	1644	2262	3046	1441	2310
214	1836	3592	3603	3821	2904	1614	2495	2847	5524	965	1824	1220	2550	985	1316	390	2702	5514	1006	3180	1451	2242	3967	2520	2404	4805	3311	2413	2159	2359	3117	2768	4117	831	1266	972	2781	1092	1310	583	1742	5112	1850	4353	1715	2364	2875	1543	2329
215	2076	3784	3475	4286	2900	1537	2377	2743	5937	864	1656	1113	2457	1270	1205	266	2434	5807	1246	3419	1542	2047	4392	2672	2270	4866	3585	2700	2550	2148	3089	2682	4275	759	1380	1144	2562	1146	1397	452	1948	5336	1858	4263	1854	2347	3170	1580	2313
216	1736	3621	3479	3595	2973	1633	2600	2850	5672	898	1630	1126	2732	1120	1385	209	2509	5831	1193	3174	1498	2293	4135	2369	2509	5029	3618	2713	2228	2294	3041	2558	4172	930	1401	1010	2601	1245	1656	538	2616	5215	1693	4550	1781	2422	2905	1555	2342
217	1896	3760	3583	3756	3143	1445	2444	2731	5556	841	1723	1160	2563	1307	1350	303	2468	5547	1017	3362	1515	2144	4261	2853	2619	4895	3566	2401	2479	2204	2907	2417	3897	830	1390	945	2182	1052	1534	525	2587	4989	1754	4217	1891	2341	3306	1591	2155
218	1972	3952	3393	3853	3141	1511	2450	2824	5304	893	1814	990	2659	1291	1492	310	2420	5647	1036	3399	1641	2267	4138	2877	2407	4799	3473	2853	2313	2184	2828	2827	4150	750	1371	1030	2399	1312	1442	545	1910	5074	1804	4627	1883	2297	3078	1496	2293
219	2032	3943	3375	4404	3059	1827	2671	2857	5488	919	1900	1049	2719	1271	1365	300	2385	5366	1010	3276	1412	2340	4312	2764	2381	4956	3613	2736	2620	2229	2941	2431	4096	997	1336	975	2641	1258	1237	506	2454	5084	1761	4076	1969	2344	2937	1613	2431
220	1955	4255	3322	4494	3104	1624	2590	2846	5736	769	1881	985	2622	1273	1205	355	2625	5498	841	3263	1485	2341	4047	2571	2579	4790	3583	2612	2363	2257	2823	2602	4193	930	1240	1098	2504	1438	1221	526	1792	4834	1821	4425	1994	2346	3080	1680	2239
221	1955	4067	3363	3972	2895	1604	2884	2912	5261	941	1745	1056	2415	1313	1289	325	2439	5481	1131	3343	1614	2247	4038	2790	2211	4939	3825	2534	2361	2353	2808	2632	4283	838	1339	1054	2474	1227	1238	516	2733	4754	1798	4245	1985	2561	2866	1613	2218
222	1860	4285	3109	4417	3081	1774	2384	2921	5472	911	1726	1084	2535	1154	1326	312	2371	5554	968	3301	1629	2387	4474	2698	2450	4982	3926	2458	2376	2039	3055	2497	3998	852	1371	1000	2507	1350	1292	506	1891	5433	1881	4172	2023	2520	3163	1551	2359
223	2090	4153	3339	4054	3017	1609	2592	2784	5218	926	1729	973	2443	1163	1312	205	2529	5418	1155	3316	1424	2294	4134	2748	2125	4789	3466	2672	2437	2363	2853	2795	4203	773	1341	1194	2368	1242	1499	697	1903	5109	1685	3951	2160	2521	3156	1419	2144
224	1960	4077	3247	4257	3051	1744	2498	2919	5258	855	1727	940	2586	1432	1292	247	2483	5587	1121	3459	1480	2329	4224	2717	2514	4972	3656	2566	2437	2328	2789	2802	4148	988	1278	1159	2700	1255	1427	696	2586	5188	1822	4289	2083	2614	2892	1437	2156
225	2061	4053	3393	4109	2811	1665	2643	2871	5382	853	1700	1061	2578	1229	1211	213	2488	5277	1049	3104	1344	2286	4330	2744	2458	4891	3525	2811	2361	2551	2783	2432	3971	889	1272	1113	2537	1325	1418	625	2905	5197	1831	4336	2097	2462	2999	1676	2260
226	2124	4406	3231	3662	3080	2004	2433	2826	5460	979	1677	1222	2613	1236	1313	349	2343	5214	928	3024	1547	2181	4346	2633	2358	5072	3643	2465	2301	2077	3011	2677	4184	716	1406	1079	2350	1309	1411	580	1705	5096	1769	4114	2096	2540	3062	1405	2336
227	1920	4108	3314	4280	3228	1693	2483	2933	5345	931	1762	1113	2629	1245	1370	278	2478	4941	996	3191	1345	2264	4349	2721	2357	4760	3660	2513	2396	2365	3010	2566	4227	769	1325	1032	2401	1247	1330	575	1913	4840	1933	3854	2156	2436	3033	1569	2285
228	2113	4239	3222	4107	3228	1568	2444	2737	5094	952	1813	1066	2689	1333	1275	320	2251	5285	1135	3382	1342	2257	4288	2694	2241	4899	3837	2620	2277	2465	3092	2611	4214	644	1295	1047	2290	1299	1586	551	2686	5135	1930	4180	2100	2261	2811	1567	2389
229	2017	4110	3286	3963	3080	1778	2600	2706	5166	910	1647	914	2555	1312	1304	314	2383	5380	1078	2987	1543	2487	4386	2735	2385	4538	3588	2578	2258	2167	2851	2397	4308	831	1182	1017	2383	1070	1307	634	2068	4637	1945	3742	1962	2605	2800	1498	2234
230	1976	4317	3360	4070	3339	1851	2680	2924	5357	819	1993	1211	2700	1177	1380	212	2338	5209	1178	2951	1747	2369	4420	2631	2317	5058	3589	2663	2325	2303	3062	2551	4310	657	1219	1086	2667	1083	1340	526	2264	5050	2150	3873	2005	2481	3044	1773	2120
231	1885	4147	3275	4473	3008	1845	2721	2860	5511	795	2087	1113	2680	1228	1280	357	2270	5202	913	3136	1456	2102	4352	2696	2260	4630	3540	2560	2435	2436	3285	2494	4086	715	1262	876	2561	1140	1185	658	1846	5205	2005	3845	2048	2508	2979	1440	2081
232	1963	4382	3075	4515	3429	1840	2587	2868	5120	899	1847	1004	2486	1381	1232	256	2463	5385	1152	3207	1638	2350	4579	2717	2449	4721	3594	2851	2507	2444	3002	2391	4392	912	1280	1075	2492	1355	1438	575	2786	4785	1916	3769	2138	2433	2858	1432	2227
233	2087	4237	3072	3918	3160	1620	2422	2909	5665	825	2109	1099	2387	1345	1285	321	2534	5502	1201	3243	1784	2182	4461	2812	2377	4438	3533	2660	2454	2312	2947	2512	4626	841	1279	1162	2281	1202	1529	521	2656	4824	2171	3919	2149	2461	3069	1569	2125
234	1941	3953	3241	4101	3498	1915	2549	2872	5322	1044	1840	1194	2646	1316	1030	198	2496	5188	1105	3039	1544	2568	4540	2717	2420	4507	3655	2618	2472	2321	3072	2458	4252	761	1447	1199	2362	1116	1400	519	2714	4725	2002	3884	2174	2641	2773	1705	2175
235	2126	4129	3123	4171	3334	1977	2475	2852	5475	912	1975	1214	2485	1319	1239	87	2431	5311	1263	2983	1483	2223	4429	2717	2353	4616	3490	2628	2210	2644	3371	2750	4688	706	1206	1092	2729	1186	1408	488	2476	4916	1975	3744	2156	2434	2689	1569	2224
236	2069	4133	3187	4692	3358	1979	2546	2898	5391	850	2053	1071	2611	1315	1073	330	2438	5275	1063	3098	1656	2338	4284	2817	2385	4485	3550	2705	2449	2255	3149	2653	4396	833	1030	1115	2467	1294	1339	508	2102	5077	2062	3778	2121	2682	2944	1393	2271
237	2221	4344	3149	4451	3081	1908	2528	2776	5541	955	1855	1143	2546	1320	1170	284	2465	5515	1263	3339	1739	2410	4746	3033	2609	4443	3597	2660	2466	2439	3198	2453	4678	928	1156	1067	2586	1259	1487	532	1969	4908	2117	4046	1998	2414	2922	1536	2247
238	2082	4180	3087	4195	3259	1803	2657	2838	5582	794	1685	1269	2557	1493	990	209	2564	5546	1075	3098	1606	2559	4499	2943	2200	4253	3729	2704	2314	2525	2742	2441	4491	662	1371	1082	2410	1295	1502	514	2145	4731	2089	3533	2217	2649	2837	1461	2282
239	2122	4168	3186	4554	3157	1804	2406	2734	5332	990	1903	984	2574	1228	1190	212	2483	5339	1204	3062	1687	2336	4156	2869	2722	4332	3716	2482	2198	2657	3058	2775	4499	677	1420	963	2554	1340	1511	426	2052	4859	2203	3886	2223	2504	2679	1619	2448
240	2029	4183	3336	4098	2964	1854	2647	2671	5190	948	1997	1013	2347	1273	1184	451	2608	5489	1099	3052	1687	2413	4407	3059	2304	4154	3399	2738	2369	2425	2921	2665	4866	896	1447	1054	2623	1199	1438	553	2399	4740	2152	3948	2062	2539	2803	1452	2362
241	2129	4276	3004	4563	2805	1993	2516	2841	5288	868	1916	1052	2556	1654	1248	116	2700	5116	1217	3006	1539	2550	4795	3059	2747	4262	3556	2395	2332	2675	3321	2577	4691	924	1361	1242	2362	1268	1624	533	2240	4685	1996	3731	2179	2428	2646	1501	2149
242	2107	4179	2978	4160	3013	1843	2539	2709	5141	970	1888	1145	2417	1344	1101	312	2485	5193	1078	2876	1638	2477	4461	3058	2325	4344	3641	2643	2316	2544	3043	2623	4701	891	1408	1080	2400	1241	1609	465	3407	4567	2117	3538	2169	2421	2730	1537	2161
243	2101	4071	3094	4408	3045	1863	2517	2275	5164	835	1964	1100	2286	1209	1140	247	2491	5126	1214	2919	1795	2546	4815	3124	2665	4376	3515	2630	2401	2294	3174	2589	4579	715	1368	1116	2379	1259	1625	539	2325	4601	2136	3923	2163	2546	2444	1491	2378
244	2023	3915	2901	4070	3075	2204	2391	2555	4968	673	1786	1272	2390	1224	989	278	2852	4811	1143	3185	1732	2410	4560	3214	2488	4557	3508	2594	2402	2367	2816	2369	4600	803	1229	1024	2586	1065	1539	385	2233	4748	2156	3830	2436	2529	2559	1803	2276
245	1963	4098	3138	3932	3203	2007	2544	2506	5338	888	1856	1085	2471	1344	1022	300	2709	5254	1085	3182	1612	2353	4410	3153	2641	4481	3223	2800	2375	2447	2900	2693	4724	684	1379	1126	2477	1246	1562	532	3401	4502	2226	3946	2453	2557	2639	1663	2359
246	1960	3934	2998	4080	2935	2087	2480	2525	5293	908	1858	1077	2421	1266	1191	266	2349	5031	1204	3074	1680	2645	4933	3183	2612	4421	3350	2738	2255	2434	2841	2760	4597	829	1331	1153	2433	1255	1559	480	3617	4490	1723	3922	2056	2415	2554	1667	2353
247	1932	3882	3037	4641	2912	2241	2601	2486	5090	887	1772	1209	2353	1403	1109	323	2613	5107	1085	3072	1677	2341	4710	2909	2812	4330	3440	2525	2350	2408	3007	2652	4625	913	1443	989	2293	1308	1658	585	2409	4663	2264	3924	2291	2285	2708	1574	2293
248	1955	3871	3048	4347	2550	2087	2662	2511	5097	767	1797	1218	2230	1236	1044	143	2546	4835	1150	3007	1614	2286	4742	3206	2505	4521	3332	2745	2525	2588	2966	2756	4910	659	1314	1165	2349	1350	1560	468	2605	4855	2058	3792	2382	2709	2629	1264	2376
249	2066	3968	2912	3982	3283	2109	2662	2304	5243	942	1811	987	2286	1254	899	232	2350	4992	1420	3095	1739	2474	4484	3215	2316	4176	3298	2569	2155	2421	2891	2667	4547	630	1327	1095	2278	1122	1711	347	2477	4739	2269	3641	2203	2771	2621	1469	2238
250	2078	4054	3102	4425	3221	2137	2518	2326	5269	903	1836	1185	2218	1289	986	319	2618	4911	1086	2906	1602	2192	4710	3357	2566	4626	3352	2978	2351	2635	2819	2484	4530	920	1325	1097	2375	1209	1596	568	2854	4727	2126	3796	2406	2509	2451	1634	2444
251	2004	3952	3227	4323	3168	2463	2432	2588	5092	749	1989	1016	2324	1226	1131	248	2626	5194	1348	3080	1756	2534	4742	3318	2479	4073	3230	2794	2496	2508	2952	2643	4446	792	1531	1201	2434	1398	1588	301	2631	4388	2198	3666	2445	2776	2711	1607	2237
252	2210	3733	2896	4570	3153	2252	2507	2283	5193	810	1805	1260	2438	1176	994	431	2409	5303	1531	2990	1635	2412	4612	3408	2487	4306	3613	2663	2225	2432	2690	2900	4696	966	1479	1149	2593	1177	1625	512	2714	4724	2076	3537	2509	2594	2809	1625	2394
253	1856	3919	3176	4543	2996	2026	2485	2446	5351	805	1833	996	2376	1149	1130	285	2268	5023	1361	2847	1783	2317	4613	3356	2539	4362	3410	2747	2426	2474	2808	2747	4474	1020	1436	1132	2561	1439	1606	401	2384	4869	2370	3523	2388	2574	2623	1530	2239
254	2057	4157	3157	4031	2880	1956	2291	2751	5086	1014	1824	1037	2488	1321	944	323	2435	4867	1164	2985	1633	2581	4508	3595	2612	4309	3295	2741	2549	2460	2849	2373	4742	757	1355	1175	2546	1445	1574	408	2829	4887	2228	3724	2386	2755	2893	1637	2304
255	2016	3912	2938	4495	2997	2195	2716	2606	5217	1088	1747	1177	2481	1184	1068	288	2240	5543	1304	3114	1726	2435	4546	3426	2429	4336	3439	2704	2492	2572	2687	2862	4614	1011	1409	1145	2541	1378	1651	349	2705	5190	2238	3388	2179	2630	2807	1648	2284
256	2061	3861	3030	4584	2648	2160	2472	2577	5241	921	1815	1091	2281	1332	1162	262	2376	5101	1396	3127	1860	2267	4579	3508	2261	4297	3576	2791	2418	2523	2810	2848	4759	819	1543	1320	2306	1243	1651	485	2569	4785	2359	3614	2335	2701	2947	1511	2259
257	2018	3998	2795	4239	2524	2376	2737	2357	5355	1082	1788	1152	2179	1229	945	314	2313	5192	1262	2946	1552	2401	4694	3514	2579	4350	3488	2630	2388	2660	2754	2894	4432	954	1476	1413	2411	1583	1498	401	2776	5110	2228	3754	2366	2622	2875	1361	2227
258	2171	3854	3236	4211	3065	2131	2337	2492	5205	1110	1763	1160	2183	1150	960	272	2450	5335	1509	2928	1604	2651	4816	3450	2415	4392	3409	2650	2482	2361	2453	2704	4668	802	1631	1115	2570	1416	1583	463	2994	4962	2032	3669	2282	2656	2783	1753	2265
259	2049	3901	2751	4790	2949	2249	2517	2817	5125	1097	1702	1291	2435	1241	1044	417	2584	5353	1250	2936	1838	2598	4492	3701	2781	4572	3606	2619	2366	2612	2730	2768	4585	698	1538	1056	2626	1327	1778	456	3346	5229	2097	3695	2316	2742	2775	1611	2406
260	2225	4017	3034	4184	2810	2314	2511	2670	5083	1038	1924	939	2415	1203	975	332	2540	5463	1208	3151	1737	2654	4503	3619	2695	4467	3544	2639	2570	2438	2525	3192	4507	885	1458	1117	2289	1388	1724	531	3332	4977	2097	3840	2424	2553	2954	1739	2382
261	2138	3831	2944	4253	2822	2342	2414	2721	4989	963	1966	1194	2379	1092	968	296	2661	5201	1295	2878	1703	2378	4744	3415	2518	4246	3468	2442	2610	2492	2488	2818	4426	807	1431	1193	2316	1511	1962	506	3370	5402	2361	3903	2340	2636	2812	1647	2339
262	2083	4084	3047	4009	2823	2698	2431	2642	5118	908	1801	1166	2406	1178	1012	245	2388	5319	1437	3042	1761	2408	4633	3844	2465	4173	3424	2667	2614	2589	2929	2991	4412	1050	1571	1051	2745	1424	1653	490	3463	5224	2046	3700	2477	2654	3043	1410	2391
263	2112	3840	2937	4463	2765	2264	2372	2646	5226	1050	1733	1151	2272	1319	1157	362	2671	5317	1128	3025	1895	2501	4556	3859	2610	4189	3332	2672	2578	2385	2645	2766	4700	775	1313	1302	2702	1385	1548	411	3471	5271	2249	3474	2259	2785	2941	1820	2325
264	2092	3811	2886	4180	3066	2536	2381	2761	4851	965	1646	1040	2398	1249	1092	381	2220	5345	1519	3010	1938	2517	4559	3788	2643	4255	3486	2687	2486	2333	2537	2918	4370	874	1772	1146	2608	1284	1654	414	3474	5314	2370	3844	2130	2504	3217	1794	2309
265	2153	3674	2809	4331	2917	2402	2441	2946	4824	965	1643	901	2171	1097	978	284	2277	5222	1478	2927	1790	2504	4692	3786	2527	4252	3710	2528	2428	2434	2914	2499	4206	879	1594	1263	2794	1469	1470	411	3480	5479	2070	3644	2204	2469	2964	1668	2251
266	1990	3644	2846	4440	2838	2287	2496	2676	5654	988	1671	1083	2368	1353	1030	430	2431	5376	1370	3059	2012	2500	4864	4139	2452	4221	3317	2460	2735	2298	2906	3015	4495	866	1594	1151	2890	1267	1639	397	3419	5680	2199	3592	2259	2648	3145	1730	2407
267	2027	3507	2937	4513	2847	2577	2475	2702	5032	1130	1661	1142	2317	1325	936	435	2396	5380	1288	3113	1891	2833	4641	3873	2488	4337	3769	2658	2727	2380	2761	2767	4502	917	1543	1305	2308	1401	1511	498	3498	5562	2100	3632	2450	2715	2927	1538	2322
268	2210	3887	2923	4474	2695	2357	2562	2567	5121	1001	1607	1234	2330	1281	1219	395	2295	5596	1296	3113	1813	2934	4721	3997	2648	4269	3699	2424	2560	2387	2769	2683	4302	892	1821	1258	2568	1552	1795	406	3436	5435	2230	3556	2178	2746	2802	1564	2246
269	1978	3972	2895	4393	2937	2355	2424	2684	4990	1020	1460	1064	2597	1177	1051	425	2555	5254	1199	3135	1996	2707	4511	4191	2731	4409	3626	2641	2336	2453	2986	2604	4382	905	1544	1153	2281	1410	1614	450	3601	5609	2208	3681	2022	2625	2791	1429	2361
270	1515	3675	2951	4006	2790	2382	2374	2527	4969	830	1675	1058	2284	1145	1040	338	2561	5481	1455	3278	1894	2713	4794	3943	2423	4588	3671	2586	2431	2444	3038	2538	4193	755	1751	1141	2497	1534	1701	416	3550	5576	2183	3816	2226	2875	2892	1528	2295
271	2004	4066	2988	4602	2619	2536	2350	2728	5086	862	1576	1076	2501	1184	986	161	2550	5495	1385	3334	2122	2782	4721	4113	2525	4237	3433	2501	2603	2345	2931	2483	4041	980	1668	1022	2599	1259	1870	310	3717	5645	2114	3667	2270	2967	2944	1519	2389
272	1807	3841	2657	4563	2848	2489	2486	2487	4925	928	1581	1052	2518	1047	1080	370	2497	5290	1316	3299	1837	2818	4489	3850	2523	4418	3765	2444	2743	2018	3065	2782	4028	907	1490	1140	2354	1473	1731	388	3474	5461	2131	3595	2115	2485	2925	1469	2225
273	1991	4130	2968	4682	2804	2542	2432	2750	5140	827	1672	1069	2246	1429	863	158	2217	5333	1203	3276	2131	2797	4438	4111	2730	4393	3767	2269	2640	2390	3034	2571	4186	707	1477	1325	2533	1563	1892	479	3703	5171	2263	3774	2071	2800	2930	1420	2624
274	1792	3988	3109	4644	3046	2540	2557	2479	4947	640	1595	1100	2552	1286	951	246	2300	5249	1495	3222	1863	2922	4155	4138	2538	4339	3817	2453	2743	2355	2717	2655	4151	984	1559	1117	2499	1376	1894	401	3418	5497	2218	3848	2336	2781	2977	1624	2486
275	1864	3924	3043	4627	2740	2709	2581	2516	4850	611	1639	1138	2358	1156	968	428	2326	5715	1112	3214	1789	2801	4417	4101	2634	4289	3657	2365	2502	2241	3121	2457	4229	939	1684	1121	2501	1286	1879	286	3500	5263	2454	3623	2541	2641	2926	1552	2445
276	1850	4190	3057	4676	3011	2441	2649	2682	4771	1092	1574	1165	2376	1141	799	313	2479	5574	1306	3098	2018	2864	4384	4164	2429	4502	3839	2758	2665	2285	3000	2528	3937	774	1517	1087	2468	1557	1639	381	3124	5765	2227	3785	2325	2678	3230	1581	2479
277	1844	4414	3073	4533	2833	2530	2612	2687	4555	823	1507	1070	2340	1236	909	387	2284	5475	1412	3303	1959	2597	4393	4362	2607	4313	3798	2473	2646	2438	3040	2518	3993	842	1669	1164	2538	1555	1885	300	3016	5406	2406	3810	2414	2858	3066	1629	2473
278	1832	4180	2994	4465	2952	2499	2498	2562	4665	691	1493	1187	2342	1396	1026	464	2386	5561	1209	3329	1899	2879	4496	3888	2694	4322	4009	2395	2830	2256	2948	2580	4329	870	1670	1211	2356	1330	1862	335	3652	5531	2282	3709	2358	2954	3213	1694	2641
279	1873	4630	3363	4637	2727	2507	2599	2673	4874	969	1683	1258	2421	1270	1113	230	2282	5479	1442	3290	1704	2897	4415	3996	2562	4341	3868	2421	2910	2519	3216	2605	4120	886	1574	1102	2752	1352	1780	379	3733	5663	2271	3740	2437	2761	2950	1588	2512
280	1743	4280	3279	4661	2819	2401	2776	2716	4893	972	1672	1197	2232	1106	1042	279	2521	5592	1409	3201	1895	2998	4450	4112	2532	4131	3744	2631	2517	2154	3278	2368	4007	713	1756	1256	2741	1480	1748	370	3528	5773	2441	3894	2332	2887	3221	1599	2525
281	1953	4205	3119	4714	2751	2622	2773	2840	4776	807	1667	1067	2485	1172	1067	237	2172	5820	1121	3433	2137	3002	4275	4101	2878	4132	4008	2634	2509	2252	3234	2494	4139	937	1629	1040	2503	1504	1741	232	3676	5980	2610	3895	2337	2762	3011	1554	2491
282	1868	4357	3175	4730	2923	2402	2682	2338	4626	867	1738	1089	2400	1047	1170	318	2236	5946	1267	3316	1847	2739	4410	4141	2519	4283	3607	2714	2714	2446	3110	2444	3933	747	1541	825	2478	1299	1817	411	3643	5452	2331	3753	2346	2994	3372	1602	2438
283	1715	4378	3343	4771	2728	2294	2353	2463	4605	740	1590	1278	2421	1248	1023	320	2395	5969	1419	3448	2270	2934	4260	4158	2702	4643	3857	2704	2759	2104	3272	2610	3991	576	1558	1141	2669	1437	1632	349	3704	5698	2217	3785	2144	2726	3268	1465	2454
284	1969	4328	3081	4687	2878	2342	2816	2110	4550	809	1560	1306	2435	1263	1130	281	2294	5722	1384	3347	1827	2969	4308	4056	2638	4071	3793	2765	2491	2394	3163	2292	4194	638	1716	1040	2347	1405	1713	389	3593	5858	2423	3725	2245	2731	3281	1541	2485
285	1953	4274	3115	4810	3025	2560	2553	2753	4786	825	1797	1165	2303	1149	1016	386	2408	6073	1350	3453	2033	3005	4555	4031	2631	3873	3873	2360	2664	2282	3091	2609	3922	978	1473	1107	2564	1398	1650	304	2497	5746	2303	3557	2090	3108	3235	1413	2383
286	2003	4375	3115	5086	2924	2263	2528	2409	4621	829	1500	1147	2215	1183	898	332	2332	5607	1347	3171	2072	2939	4392	4240	2674	4095	4192	2615	2852	2046	3314	2225	3964	793	1755	1208	2477	1635	1777	371	3362	5799	2255	3472	2290	2851	3305	1433	2528
287	1965	4309	3270	4703	2954	2349	2538	2600	4893	877	1573	1204	2681	1031	934	370	2339	5528	1362	3260	2153	2937	4362	4273	2718	4131	4250	2725	2817	2106	3177	2919	3920	841	1642	1066	2429	1307	1689	463	3713	5559	2364	3704	2318	2783	3427	1560	2474
288	1819	4045	3268	5192	3039	2110	2663	2484	4357	680	1552	1115	2229	1071	910	339	2216	5702	1665	3463	2142	3002	4398	4332	2749	4139	3836	2502	2680	2096	3278	2747	3998	988	1535	996	2404	1469	1835	484	3623	5902	2330	3667	2060	2877	3351	1702	2482
289	1816	4127	3048	5153	3107	2415	2428	2729	4794	937	1721	1223	2453	1147	876	390	2223	5529	1414	3308	1616	3277	4399	4175	2449	3860	3574	2713	2627	2260	3144	2572	4020	1086	1666	1141	2524	1502	1714	389	2513	5964	2218	3210	2204	2780	3570	1508	2729
290	1898	4117	3025	5159	2934	2404	2628	2373	4396	750	1716	1134	2339	1258	1034	344	2495	5807	1451	3446	2316	3267	4519	4295	2623	3629	3915	2538	2762	2321	3123	2293	4040	927	1652	1079	2548	1580	1543	334	3622	5888	2278	3630	2246	2907	3683	1749	2535
291	1713	4300	2989	4956	2878	2164	2501	2227	4501	1001	1667	977	2307	1250	884	268	2108	5763	1411	3410	1807	3046	4289	4097	2761	3865	3654	2678	2492	2327	3394	2501	3968	954	1645	1271	2328	1497	1630	461	3495	5692	2363	3722	2628	2734	3766	1332	2630
292	1836	4257	2978	5170	2881	2308	2392	2630	4613	889	1513	1121	2378	1185	713	257	2290	5428	1436	3266	2105	3159	4382	4011	2560	3653	3983	2685	2810	2211	3080	2453	4129	892	1715	1127	2628	1484	1570	408	3736	5746	2463	3600	2406	2665	3373	1731	2653
293	1857	4221	3213	5179	3365	2019	2558	2298	4692	871	1642	944	2726	1143	869	352	2242	5677	1573	3412	2097	3229	4166	4405	2764	3881	3843	2337	2756	2202	3197	2206	3996	982	1765	1083	2365	1616	1661	397	2578	5677	2280	3763	2377	2728	3350	1606	2474
294	1775	3960	2959	5044	2904	2274	2690	2344	4776	704	1605	956	2468	1087	920	360	2523	5556	1351	3183	2151	3048	4154	4147	2721	4083	3765	2523	2635	2175	3301	2289	4196	774	1700	1200	2350	1539	1646	353	3658	5844	2298	3886	2377	2770	3666	1585	2716
295	1758	3959	3300	4752	3030	2183	2485	2538	4773	748	1483	955	2486	1223	980	306	2427	5752	1633	3279	2393	3175	4157	4253	2779	3822	4066	2581	2621	2184	3278	2135	4207	757	1591	1100	2461	1532	1754	275	3629	5805	2220	2751	2298	2957	3569	1598	2464
296	1605	4136	2879	5168	2781	2084	2379	2591	4589	675	1664	923	2234	1254	972	361	2574	5635	1417	3192	2240	3295	3912	4653	2622	3908	3982	2568	2624	1850	2863	2205	4066	885	1683	1137	2688	1456	1448	422	2416	5811	2167	3752	2363	2894	3623	1576	2572
297	1595	3962	2968	4633	2918	2014	2617	2477	4745	730	1435	1011	2439	1181	886	299	2303	5675	1592	3474	1802	3182	4171	4171	2646	4124	4009	2195	2845	2269	3154	2295	4322	846	1698	1004	2462	1511	1543	260	2502	5751	2440	3695	2396	2704	3746	1524	2733
298	1620	4011	2855	4884	2996	2031	2551	2240	4572	908	1616	1006	2551	1166	976	309	2341	5631	1457	3173	1988	3127	4015	4600	2605	4187	3683	2557	2716	2099	3448	2112	3989	858	1660	1149	2270	1626	1566	422	3523	5917	2169	3699	2395	3011	4003	1568	2555
299	1716	3814	2744	5140	2867	1976	2520	2559	4638	768	1575	973	2556	1096	814	327	2391	5407	1489	3207	2128	3349	3946	4397	2762	3915	4069	2320	2472	2131	3112	2150	4018	930	1756	1075	2475	1503	1616	473	3580	5737	2306	3893	2401	2861	3835	1527	2629
300	1761	3989	2809	4990	3033	1870	2428	2226	4674	766	1570	894	2493	1201	868	370	2410	5666	1473	3100	2089	3238	4159	4456	2818	3821	3998	2367	2627	2114	3142	2283	4167	872	1858	1035	2460	1521	1358	379	2390	6021	2227	3897	2298	2830	3502	1563	2467
301	1819	3527	2768	4884	3119	1736	2535	2578	4540	922	1701	1009	2162	1229	936	270	2253	5325	1403	3592	2156	3488	4215	4517	2619	3930	3926	2640	2623	2210	3211	2239	4074	974	1692	1205	2514	1699	1553	371	3796	5789	2108	3899	2495	2983	3852	1538	2509
[truncated: 232 more columns]

## Sheet: WT AWC to dia
Figures 5B, 5S-1B, 5S-1F, 5S-3J
AWC::GCaMP5A F(A.U.)
Stimulus:	0
Genotype:	WT
N:	1	2	3	4	5	6	7	8	9	10	11	12	13	14	15	16	17	18	19	20	21	22	23	24	25	26	27	28	29	30	31	32	33	34	35	36	37	38	39	40	41	42	43	44	45	46	47	48	49
Frame (Pulse at 100)
1	1836	2336	2599	2382	1088	1182	897	2705	1539	2126	3928	4356	3968	2409	1253	3219	4749	3596	14692	1020	1665	2183	3593	5034	1354	842	995	1766	2475	1877	3348	4144	2874	2879	2668	7533	3816	2548	9670	1289	2034	2403	8088	2206	1972	3761	2324	2721	8526
2	1601	2466	2415	2256	943	1125	912	2648	1842	2090	4047	3963	3879	2527	1413	3125	4724	3797	14901	1283	1826	2160	3505	4591	1332	734	885	1712	2700	1953	3156	3620	3106	2999	2078	7379	3623	2712	9683	1171	2257	2186	8893	2217	2109	3787	2334	2730	8430
3	1685	2392	2514	2385	1155	1141	853	2704	1605	2012	4146	3433	3931	2782	1220	3128	4621	3443	15163	1610	1824	2070	3789	4845	1249	889	1064	1802	2322	2034	3070	3675	2858	2964	2287	7316	3853	2517	9622	1452	2446	2313	9011	2260	1796	3421	2524	2825	8503
4	1550	2562	2886	2225	888	1172	829	2637	1842	1859	4027	3059	3985	2958	1331	3316	4635	3530	15127	1339	1611	2083	3744	4923	1272	829	841	1442	2548	2227	2762	3510	2930	3063	2679	7423	3774	2727	9530	1452	2220	2306	7979	2001	1860	3653	2399	2739	8787
5	1634	2477	2872	2364	865	1041	836	2881	1712	1781	4067	4389	4297	2982	1201	3197	4578	3774	15574	1088	1880	2237	3809	4922	1148	584	1051	1882	2395	2072	3116	3839	3077	2987	2590	7285	3882	2690	9270	1397	2262	2420	8240	2299	1954	3592	2218	2551	8347
6	1699	2574	2649	2234	1023	1126	894	2650	1626	1987	3785	4417	3777	2485	1039	3132	4477	3526	15644	1153	1573	2126	3462	4974	1511	956	873	1590	2342	1942	3255	3722	3170	2965	2653	7591	3815	2892	9411	1502	2230	2358	8168	2309	1785	3570	2456	2427	8369
7	1724	2607	2510	2265	1012	1091	797	2701	1810	1919	3825	4488	4100	2631	1221	3051	4650	3461	15554	1438	1616	2207	3649	5018	1252	814	989	1805	2476	1949	3337	3470	2639	3247	2276	7317	3524	2427	9594	1230	2312	2298	8514	2533	1967	3600	2423	2693	8261
8	1599	2547	2536	2037	948	1090	736	2641	1587	2036	4200	4575	4083	2454	1007	3265	4230	3765	15227	1238	1670	2133	3634	4892	1128	890	902	1790	2544	1860	2918	3572	2917	2852	2650	7207	3583	2710	9322	1370	2194	2303	8365	2339	2065	3443	2402	2613	8217
9	1564	2662	2932	2239	1124	1073	903	2504	1695	1813	4214	4432	4151	2874	1172	3209	4664	3669	15523	1217	1765	2118	3799	5280	1354	672	1026	1737	2574	1910	3082	3470	2943	2850	2362	7200	4021	2554	9381	1325	2284	2299	8458	2136	1814	3618	2334	2708	8508
10	1644	2597	2611	2343	954	1046	809	2518	1601	1981	3744	4663	3405	2150	1337	3261	4860	3563	15353	1203	1663	2168	3424	4974	1149	876	899	1703	2581	1827	3020	3654	3115	3060	2748	7051	3660	2851	9577	1497	2394	2240	8135	2098	1768	3680	2154	2370	8285
11	1506	2571	2576	2207	1104	1156	736	2565	1673	1983	3993	4457	4166	2637	1150	3288	4614	3807	15439	1217	1758	1956	3717	5047	1282	909	826	1630	2070	1920	3222	3586	2958	2987	2506	7345	3835	2611	9502	1537	2366	2457	8437	2390	1869	3417	2451	2560	8290
12	1688	2632	2725	2061	901	1229	871	2469	1682	1996	4207	4530	4031	2803	1318	3285	4411	3580	15365	1452	1911	2030	3721	4814	1258	837	1002	1431	2385	1930	3164	3602	2766	2915	2351	7086	3934	2707	9284	1401	2233	2094	8330	2362	1680	3583	2057	2577	8449
13	1617	2565	2922	2303	982	1096	783	2574	1483	2045	3966	4417	4108	3119	1164	3092	4433	3770	15510	1375	1770	2058	3569	4855	1197	792	1026	1717	2158	1880	3261	3796	2960	2729	2650	7110	3949	2571	9592	1337	2238	2197	8413	2248	1862	3590	2336	2637	8673
14	1719	2528	2441	2093	1127	1378	867	2626	1644	1750	4152	4480	4079	3151	1695	2988	4534	3321	15206	1328	1817	1914	3676	4829	1204	834	935	1773	2415	1916	3220	3345	3095	2843	2286	7521	3924	2753	9276	1392	2269	2286	8275	2162	1723	3424	2387	2884	8569
15	1518	2697	2842	2204	1059	1136	878	2618	1545	1993	4319	4304	3652	2999	1719	3256	4849	3906	15268	1342	1740	2103	3701	5291	1315	695	908	1563	2543	1997	2999	3666	2855	3065	2292	7062	3416	2525	9376	1175	2114	2205	8198	2225	1720	3429	2304	2661	8704
16	1601	2561	2852	2246	1049	1253	948	2628	1478	1931	3991	4464	4089	2924	1568	3211	4708	3702	14893	1244	1678	1891	3698	4952	1181	827	1007	1726	2341	1833	2996	3530	2911	2554	2343	7226	3963	2714	9380	1187	2452	2227	8186	1845	1656	3516	2333	2430	8554
17	1471	2490	3041	2231	1202	1085	893	2390	1525	1975	4166	4328	3932	2479	1514	3244	4605	3693	15390	1305	1712	1829	3897	4982	1386	895	954	1499	2750	1701	2955	3638	2878	3035	2420	7361	4064	2557	9667	1269	2261	2156	8502	2043	1902	3498	2398	2518	8246
18	1709	2601	2976	2299	969	1085	938	2581	1549	2039	4475	4554	4263	2866	1265	2784	4773	3769	15275	1444	1823	1942	3304	5361	1321	809	856	1604	2386	1677	3071	3716	3000	2878	2678	7441	3959	2587	9507	1583	2532	2264	8266	2093	1862	3549	2262	2449	8553
19	1552	2520	2966	2247	1055	968	967	2627	1497	1870	3958	4495	4207	2418	1212	3377	4627	3868	15135	1359	1560	2036	3754	5201	1221	699	798	1721	2443	1897	3179	3743	2863	2903	2878	7258	4288	2667	9501	1176	2128	2271	8286	1864	1692	3335	2503	2567	8480
20	1738	2558	2995	2107	1020	1130	1050	2667	1690	1885	4114	4472	4179	2986	1326	3208	4777	3941	15349	1381	1874	2275	3734	5361	1302	748	962	1668	2448	1894	3142	3893	3042	2867	2552	7477	3940	2535	9621	1364	2387	2241	8440	2202	1835	3321	2334	2595	8226
21	1688	2701	2658	2133	936	998	821	2522	1591	1948	4020	4411	4197	2717	1302	3131	4835	3773	15087	1340	1693	2014	3861	5163	1283	775	798	1587	2406	1847	3144	4116	2969	3239	2881	6895	3937	2736	9555	1340	2232	2179	8286	2632	1872	3266	2375	2517	8614
22	1482	2544	3037	1985	1017	1036	798	2311	1714	1935	3857	4494	4370	2409	1150	2952	4554	3951	15547	1294	1872	2215	3822	5350	1397	797	890	1712	2271	2019	2970	-4	3157	2957	2897	7166	3794	2825	9439	1137	2282	2214	8921	1978	1851	3302	2430	2573	8415
23	1655	2553	2847	2151	1046	1176	921	2372	1808	1951	4175	4196	4335	2490	1183	3396	4911	4052	15144	1441	1525	2043	3575	5261	1183	837	893	1672	2346	1881	3089	4005	3063	3130	2483	7111	3506	2735	9024	1468	2077	2225	8103	2124	1918	3407	2443	2500	8422
24	1552	2486	2803	2195	1058	1267	803	2420	1517	1997	4176	4419	3813	2774	1154	3123	4885	4199	15030	1342	1860	1893	3916	5168	1246	1000	1037	1605	2478	1820	3124	3712	2996	3146	2907	7103	3946	2786	9344	1130	2104	1981	8139	2131	1861	3492	2437	2444	8453
25	1744	2685	3120	2185	1008	1121	937	2226	1614	2099	4040	4621	4195	2810	1349	3198	4297	4117	14967	1273	1927	1853	3870	5602	1096	821	1058	1724	2369	1640	3095	3640	2629	3076	2506	7191	4025	2707	9431	1500	2238	2219	8642	2015	1840	3574	2605	2546	8546
26	1620	2747	2479	2143	1088	1197	818	2385	1666	1913	3970	4281	4052	2682	1426	3129	5000	4021	14959	1314	1792	1965	3823	5285	1338	862	1032	1652	2353	1831	3086	3831	2987	2798	2937	7507	3780	2787	9627	1388	2256	2060	8313	2460	1788	3443	2470	2473	8355
27	1609	2667	2629	1980	1014	1077	709	2615	1457	2045	4347	4535	4379	2544	1519	3215	5173	4231	15047	1266	1800	1990	4078	5345	1236	856	883	1702	2241	1795	3082	3805	3042	2915	2761	7134	3351	2875	9430	1392	1864	2375	8070	1981	1864	3360	2447	2477	8654
28	1649	2381	2966	2278	786	1069	888	2611	1594	1933	4127	4619	4165	2926	1598	3223	5296	3994	14955	1255	1642	2067	4072	5313	1191	811	803	1743	2438	1867	3075	3762	3055	2900	2931	7345	3753	2673	9143	1274	2324	2276	8053	2485	1968	3462	2510	2361	8559
29	1804	2697	2716	2251	909	1099	801	2342	1458	1966	4216	4545	4140	2588	1448	3247	5291	4182	14956	1201	1791	2149	3920	5358	1066	826	852	1547	2414	2139	2956	3753	3142	3006	2893	7369	3789	2574	8802	1340	2234	2088	8452	2047	1779	3429	2513	2619	8677
30	1692	2558	2834	2108	1037	1170	1001	2492	1688	1997	4067	4137	3738	2403	1386	3340	5315	4269	15213	1250	1491	1911	4133	5197	1302	953	933	1749	2299	1927	2994	3563	3017	2931	2434	7244	4081	2815	8780	1279	2122	2319	8247	1904	1730	3668	2467	2483	9262
31	1604	2707	3000	2039	860	1135	867	2575	1644	1928	4460	4455	4124	2789	1279	3337	5169	4153	14821	1122	1766	2016	3893	5416	1322	852	927	1737	2428	1691	3232	3728	3038	3068	3041	7504	4031	2814	9347	1250	2178	2149	8193	2164	1726	3507	2680	2651	8502
32	1692	2688	3033	2010	1193	991	910	2451	1571	1729	4274	4359	4068	2941	1449	3131	5247	4291	15208	1448	1863	1923	3749	5298	1285	822	977	1678	2119	2106	3101	3666	2784	2829	2749	7076	3892	2774	9393	1330	2284	2321	8077	1899	1944	3294	2761	2452	8648
33	1789	2851	2835	2112	1047	1163	825	2769	1774	1926	4255	3634	3743	2900	1489	3013	5264	4482	15168	1313	1702	1745	4031	5260	1220	875	980	1628	2318	2164	3062	3619	3043	2849	2339	7217	3855	2614	8749	1013	2140	2259	8084	2044	1813	3522	2429	2629	8458
34	1606	2755	2881	2058	1033	1199	957	2570	1781	1891	4551	4558	3964	2884	1342	3256	5292	4538	14999	1356	1692	1812	3772	5432	1266	839	901	1769	2252	2137	3170	3761	2841	3038	2691	7144	3921	2709	8904	1172	1869	2132	8348	1946	1796	3402	2626	2653	8647
35	1514	2778	2806	2004	1068	1064	814	2574	1759	1904	4303	4189	3954	2780	1247	3274	5032	4429	14921	1212	1850	1993	3810	5227	1222	818	922	1614	2405	2056	3179	3641	3056	2982	2639	6835	3846	2852	8767	1170	2076	2358	8435	2456	1841	3358	2448	2526	8414
36	1580	2773	2963	2141	1027	1063	895	2156	1771	1830	4076	4299	3990	2471	1185	3116	4825	4568	15094	1097	1783	1981	3998	5164	1227	759	1022	1637	2346	1941	3135	4121	2982	2862	2656	7095	4010	2674	9586	1379	2395	2328	8870	1891	1743	3128	2831	2618	8457
37	1791	2750	2546	2207	966	1121	840	2452	1799	1771	4379	4519	4184	2949	1372	3151	5286	4549	15256	1261	1908	1994	3979	5191	1258	777	1106	1774	2419	2007	3196	4008	3232	2688	3018	7208	3937	2712	8935	1394	2240	2227	7956	1988	1921	3313	2541	2528	8372
38	1682	2646	2696	2043	1136	1237	704	2291	1676	1985	4237	4165	3838	2749	1139	3375	5098	4505	14948	1208	1979	2094	3979	5233	1226	901	930	1774	2351	2232	3327	4013	2899	2892	2352	6947	3879	2699	8594	1332	2003	2188	8290	2244	1909	3348	2712	2541	8464
39	1646	2619	2862	2018	843	1117	852	2489	1736	1973	4221	4568	4057	2565	1413	3389	5178	4620	15336	1340	1744	1909	3987	5313	1097	768	1009	1644	2238	1810	3397	4086	3094	2658	2851	7165	3887	2801	8722	1349	2124	2179	8212	2132	1712	3428	2580	2677	8513
40	1613	2673	2642	2314	1077	1137	851	2195	1727	1857	4440	4225	3961	2766	1352	3357	5297	4802	15131	1229	1965	1950	3835	5511	1409	852	915	1769	2221	1928	3164	3529	3317	2651	2774	7011	4248	2610	8872	1344	2442	2426	8191	2119	1827	3378	2384	2591	8573
41	1694	2584	2662	2181	1093	1138	852	2133	1812	1834	4264	4781	3776	3059	1241	3136	5213	4692	15536	1172	1999	1849	4006	5274	1438	792	953	1637	2329	2068	3376	3589	2780	2596	2528	6883	3688	2749	8780	1234	2020	2190	8118	2272	1772	3703	2639	2538	8304
42	1612	2595	2678	2114	1039	938	850	2452	1735	1920	4295	4273	4099	2840	1324	3321	5331	4484	15638	1252	2025	1854	3873	5189	1087	820	1007	1813	2201	1962	3162	3875	3149	2799	2454	7243	3829	2811	8598	1324	2261	2247	8393	1918	1601	3331	2410	2563	8923
43	1538	2633	2846	2012	889	1064	770	2387	1787	2063	4188	4011	3932	3132	1187	3174	5154	4711	15241	1298	1975	1944	3759	4978	1241	865	982	1842	1996	1992	3389	3587	3427	2773	2300	6964	4046	2810	8759	1335	2151	2466	8121	1883	1711	3404	2623	2312	8276
44	1841	2780	2510	1888	1054	1148	857	2318	1750	1967	4434	4392	4461	3041	1352	3111	5386	4575	15542	1320	2067	1818	3655	5370	1317	785	896	1634	2233	1903	3356	3701	2803	2677	2418	6869	4007	2757	9067	1299	2150	1952	8777	1903	1670	3305	2550	2598	8334
45	1511	2661	2928	2197	1014	1087	846	2575	1792	1828	4320	4596	4054	3144	1401	3099	5182	4434	15055	1249	1742	1792	3766	5144	1253	786	999	1693	2222	2103	2929	3848	3086	2796	2880	6917	3778	2543	9487	1225	2120	2076	8565	1939	1677	3521	2487	2585	8428
46	1597	2716	2819	2143	926	1196	787	2523	1764	2005	4403	4559	4055	3099	1250	3301	5127	4404	15390	1167	1854	1915	3868	5240	1230	918	1118	1676	1956	1987	3266	3921	2872	2508	2691	6793	3965	2584	9062	1179	2112	2337	8392	2051	1752	3339	2645	2483	8458
47	1901	2681	2433	2109	1050	1078	806	2511	1701	1787	4232	4025	4019	3064	1077	3309	5301	4614	15371	1380	1726	1688	3772	5259	1315	934	1007	1555	2061	2028	3193	3840	2960	2781	2622	6659	3840	2754	8538	1345	2006	2477	8296	1925	1768	3449	2402	2446	8484
48	1645	2740	2842	2136	1015	1179	748	2667	1759	1857	4454	4141	3775	2980	1251	3041	4746	4728	15183	1307	1933	1768	3496	5184	1232	743	1040	1518	2266	1993	3176	4020	3073	2677	2215	6833	3455	2820	8657	1194	2052	2307	8313	1976	1793	3556	2391	2290	8282
49	1682	2581	2888	2079	1042	1173	782	2753	1871	1865	4341	4023	3974	2515	1349	3173	5087	4466	15191	1143	2000	1780	3829	5328	1279	855	1132	1517	2228	2208	2984	3984	3208	2694	2804	6815	3789	2628	8972	1279	2358	2237	8061	2002	1705	3398	2547	2412	8360
50	1713	2525	2659	2168	955	947	769	2436	1928	1818	4405	4285	4144	3005	1480	3263	5120	4705	15245	1290	1713	2024	3781	5368	1394	944	971	1946	2258	1867	3344	3791	2794	2682	2244	6622	3806	2813	8701	1386	1952	2218	8451	2003	1808	3561	2561	2481	8229
51	1765	2633	2443	2067	1098	1194	839	2852	1987	1799	4210	4349	4045	2814	1251	3220	4831	4549	15106	1305	1774	1779	3679	5237	1173	769	945	1504	2062	1867	3220	3947	3096	2605	2525	6651	3728	2829	8551	1601	1937	2269	8671	2016	1847	3308	2557	2542	8435
52	1594	2456	2455	1961	846	1271	936	2703	1953	1883	4128	4273	3618	2953	1378	3303	4929	4658	15380	1120	1777	1699	3834	5168	1069	740	1066	1637	2089	2009	3292	3983	3090	2570	2440	6644	3682	2628	8367	1386	2190	2256	7947	2079	1708	3533	2400	2421	8447
53	1611	2317	2713	1834	1134	1005	758	2505	1792	1942	4241	4253	4002	3240	1186	3230	4935	4516	14970	1209	1858	1805	3775	5414	1187	808	1115	1529	2042	1927	3090	3657	3287	2564	2322	6491	3819	2827	8708	1235	2218	2059	8265	1717	1790	3443	2569	2436	8161
54	1716	2448	2722	1806	806	998	857	2542	1968	1983	4304	4203	4089	2865	1405	3324	4886	4680	15148	1409	1838	1971	4024	5170	1339	935	1069	1592	1770	1847	3096	4128	3062	2658	2869	6534	3822	2812	8699	1406	2135	2257	8542	1916	1800	3641	2669	2615	8486
55	1816	2471	2582	2293	946	828	704	2724	1858	1915	4275	4337	4088	3109	1205	3194	4987	4277	14773	1304	1871	1851	3623	5373	1385	801	1091	1541	2125	1996	3278	3924	2913	2706	2931	6347	3857	2785	8882	1371	2266	2336	8230	1864	1660	3579	2629	2611	8488
56	1839	2447	2707	2083	1132	1163	1021	2642	1897	1890	4214	4161	4085	2844	1268	3193	5133	4511	14583	1241	1994	1661	3772	5304	1233	909	998	1434	2054	1929	3351	3769	2932	2762	2423	6642	3978	2595	8932	1350	1704	2230	8133	1742	1802	3565	2682	2660	8474
57	1730	2486	2440	2128	1041	1206	858	2728	1877	2113	4175	4084	3986	3208	1246	3279	5192	4375	14734	1241	1877	2113	3964	5343	1454	759	979	1480	1973	2009	3347	3766	2934	2716	2514	6255	3838	2570	8819	1199	2211	2382	8282	1995	1687	3502	2471	2716	8277
58	1695	2387	2580	1980	1110	1128	847	2622	1985	1780	4191	4241	4082	2982	1229	3230	5234	4473	14588	1292	1902	1997	3956	5284	1446	845	1042	1569	2165	1947	3302	3612	2904	2779	2287	6413	3353	2516	9082	982	2076	2221	8264	1902	1711	3542	2574	2571	8158
59	1584	2607	2798	2162	798	1050	899	2886	1796	2222	4343	4496	4047	3186	1017	3180	4983	4284	14730	1185	1624	2019	3855	5191	1289	896	1146	1690	2335	2109	3137	4055	2962	2745	2369	6218	3788	2741	8813	1174	2254	2173	8401	1976	1534	3459	2576	2829	8649
60	1819	2605	2650	2163	974	1300	839	2695	1803	1993	4301	4202	3905	2786	1139	3227	5283	4543	14486	1237	1958	1879	4026	5129	1044	691	1070	1596	2396	1912	3277	3873	2972	2634	2708	6750	3946	2912	8703	1279	2278	2322	8279	1962	1592	3670	2737	2739	8498
61	1729	2594	2624	2170	776	984	734	2771	1935	1969	4289	4282	4226	3241	1208	3318	5273	4319	15172	1156	1776	1787	3791	5188	1257	888	1140	1628	1985	1744	3159	3759	2690	2746	2570	6483	4005	2840	8634	1274	2374	2335	7937	1931	1720	3450	2559	2821	8654
62	1672	2504	2451	2080	699	1040	926	2260	2167	1859	4407	3843	4272	3081	1255	3397	5040	4311	14680	1404	1981	1904	3937	4957	1358	858	1107	1510	2080	1958	2904	3796	3010	2645	2103	6379	3939	2805	8603	1417	1793	2237	8035	1917	1671	3613	2617	2705	8748
63	1700	2647	2479	2148	953	1155	943	2613	1920	1878	4342	4467	4366	3016	1074	3210	5386	4070	15268	1201	1903	1889	4016	4930	1142	902	1032	1479	1981	1884	3292	3957	2802	2790	2469	6168	3885	2710	8695	1508	2215	2318	8742	1953	1761	3687	2474	2779	8673
64	1474	2617	2801	2070	1100	993	897	2219	2099	1983	4374	4427	3943	2543	1122	3471	4991	4319	14588	1076	2036	1731	3992	5281	1144	875	955	1427	1936	1914	3224	3724	2878	2760	2283	6043	4104	2737	8276	1600	2307	2353	8172	1910	1738	3494	2814	2901	8565
65	1512	2556	2858	2105	1213	996	605	2588	1914	2011	4232	4107	4059	3064	1248	3576	5182	4292	14745	1176	1735	1928	4088	5496	1260	746	1047	1720	2057	2018	3064	3701	2637	2897	2627	6150	4188	2701	8326	1411	2207	2232	8000	1875	1794	3486	2632	2557	8490
66	1633	2154	2772	2105	899	1195	750	2637	1977	1913	4568	4053	3902	3002	1400	3596	5112	3969	14681	1075	2008	1907	3915	5085	1256	840	1027	1766	1985	1967	3160	3999	2927	3055	2735	6027	4113	2447	8295	1104	1963	2154	7955	2399	1625	3314	2587	2807	8638
67	1622	2574	2950	2114	1017	1174	817	2156	1924	1801	4374	4221	4138	2933	1134	3281	5247	3964	14844	1144	1907	1876	3884	5205	1016	730	999	1639	2212	1958	3297	3936	2967	2902	2598	6154	4074	2479	8567	1096	2285	2184	8003	2098	1645	3531	2698	2860	8589
68	1770	2567	2951	2036	1124	1001	771	2661	1998	1888	4384	4115	4125	3113	1261	3270	4530	4009	14855	1196	1876	1988	4002	5069	1250	640	1009	1619	1938	1756	3225	3925	3058	2958	2298	6030	4075	2694	8582	1040	1806	2131	8269	1880	1654	3503	2778	2545	9021
69	1567	2572	2868	1975	1004	1029	859	2329	1949	2038	4165	4195	4204	2952	1236	3334	5021	4279	15184	1308	2090	1916	3976	5252	1281	847	1050	1599	1906	1850	3270	3588	3027	2917	2288	5924	4143	2631	8560	1150	1960	2197	8263	1931	1611	3500	2739	2560	8457
70	1588	2369	2899	2150	1169	973	720	2557	2090	2023	4143	3974	4062	2925	1282	3339	4869	4011	14838	1087	1862	1846	3856	5218	1386	911	1044	1638	2127	1581	3403	4035	2926	3159	2385	6014	3944	2611	8865	1331	2120	2112	8021	1886	1767	3545	2484	2679	8872
71	1665	2740	2776	2265	951	1148	843	2586	1943	1781	4533	4095	4233	2902	1215	3404	4905	4054	15280	1240	1904	1827	3919	5390	1152	923	1027	1828	2149	1830	3166	3876	2831	2743	2340	5926	4275	2367	8637	1093	2001	2253	8209	2156	1872	3499	2559	2568	8527
72	1492	2543	2786	2018	856	936	999	2349	1990	1934	4492	4327	4157	2991	1136	3942	5245	4171	15113	1268	2040	1851	4005	5718	1138	761	1132	1641	2144	1844	3203	3918	2876	2983	2337	6065	4317	2422	8730	1441	2089	2082	8208	2106	1960	3440	2517	2599	8582
73	1463	2650	2813	2199	861	1141	845	2612	1921	1974	4415	4395	4099	3071	1138	3836	4474	4202	15141	1354	1811	2061	3844	5201	1245	744	1027	1683	2103	1870	3154	3546	3159	2957	2609	6020	4193	2390	8588	1190	1901	2105	7920	2027	1746	3310	2724	2760	8667
74	1687	2554	2792	2045	954	1125	715	2295	1986	2067	4299	4461	3858	2965	1300	3913	4683	4255	14899	1188	2006	1911	3910	5293	1187	802	1006	1560	2159	1853	3188	3800	3003	2744	2204	5745	3522	2434	8290	1215	2233	2319	8422	1881	1762	3621	2756	2703	8442
75	1644	2493	2595	2094	913	963	759	2597	1748	2027	4009	4438	3928	3166	1329	3817	4856	4001	14988	1295	1966	1737	3837	4860	1254	701	1136	1565	2041	1917	3207	4059	3110	2824	2276	6059	4444	2422	8634	1483	2054	2122	7985	1936	1829	3467	2505	2742	8415
76	1633	2412	2897	2172	1141	1092	721	2525	2048	1889	4068	4147	3983	2927	1294	3791	4858	4027	14981	1107	1837	1784	3859	5442	1154	946	941	1691	1995	1852	3200	3989	3002	2812	2743	5853	4192	2418	8517	1190	2113	2154	8218	1909	1815	3483	2654	2712	8082
77	1605	2749	2665	1995	866	1079	824	2543	1930	1965	4098	4419	4178	2965	1246	3394	4808	4035	15027	1241	2008	1806	3754	5086	1204	805	1037	1554	2006	1832	3262	3831	3138	2841	2009	6016	4106	2379	8456	1148	2224	2223	7912	1859	1825	3568	2680	2800	8225
78	1638	2372	3099	2244	963	1095	793	2598	1910	1934	4020	4200	4224	2892	1199	3883	5047	4243	14918	1236	1978	1827	3873	5265	1251	903	935	1633	2285	1992	3210	4022	2911	2490	2319	5914	4345	2332	8462	1385	2324	2105	8513	1840	1816	3476	2697	2652	8918
79	1630	2487	2880	2069	1041	1034	824	2547	1808	1934	4334	4204	3964	2996	1263	3878	4719	3807	14993	1431	2024	1880	3656	5540	1169	720	1037	1716	2137	1929	3199	3972	3073	2679	2407	6246	4162	2567	8261	1357	1814	2179	8126	1823	1846	3520	2737	2702	8280
80	1534	2444	3006	2091	915	939	768	2598	1900	1909	4222	4488	4113	3080	1387	3987	4749	4207	15026	1338	1849	1981	3823	5573	1314	958	983	1808	2229	1855	3041	3767	3060	2786	2215	6122	4339	2491	8302	1345	1911	2310	8391	1903	1667	3808	2647	2589	8212
81	1746	2507	2915	2258	996	1083	853	3039	2081	2049	4049	4543	4009	2917	1235	3641	4838	4174	14691	1318	2086	1818	3846	5224	1171	719	921	1619	2167	1752	3348	4064	2972	2959	2056	5959	3821	2433	8297	1582	2119	2441	8339	1851	1791	3461	2664	2385	8513
82	1571	2686	2813	2157	1055	1223	680	2627	1876	1918	4242	3934	3725	3024	1169	3933	4771	4103	14800	1138	2108	1809	3892	5531	1204	1004	982	1657	2158	2064	3417	3832	3185	2968	2225	5877	3999	2414	8340	1343	2106	2090	8183	1842	1733	3392	2807	2892	8753
83	1603	2440	2671	2074	1118	1068	751	2504	1955	2050	4113	4594	3919	2562	1156	3799	4497	4249	14695	1346	2178	1597	3973	5462	1141	873	1061	1639	2284	1943	3184	3933	2847	2816	2289	6192	4386	2468	8061	1326	2137	2247	8406	1830	1817	3563	2917	2611	8632
84	1632	2505	2923	2210	1048	1132	855	2354	2086	1894	4122	4393	4068	2994	1295	3652	4421	3979	14831	1263	1878	1732	3833	5855	1059	950	919	1681	2258	1848	3429	4155	3014	2595	1964	5855	4422	2584	8327	1406	2060	2361	8035	1765	1919	3710	2938	2570	8950
85	1709	2593	3009	2169	1054	946	809	2607	1931	1917	4246	4449	3978	2787	1180	3639	4838	4150	14831	1039	2140	1733	3866	5559	1015	871	872	1770	2164	1967	3216	3869	3209	2513	2523	5957	4493	2536	8239	1408	2110	2218	8042	1702	1671	3588	2507	2634	8268
86	1563	2416	2970	2100	1196	1140	861	2614	1967	2072	4200	4341	3733	2867	1251	3755	4949	4031	14954	1119	2238	1738	3970	5565	959	931	969	1612	2211	1754	3484	4030	2974	2763	2500	5947	4166	2499	8293	1344	1859	2399	8070	1852	1915	3547	2919	2826	8942
87	1621	2540	2848	2183	981	1081	801	2573	2110	1995	4057	4534	4040	3000	1213	3919	4770	4192	14759	1193	1977	1734	3871	5465	1135	789	1072	1570	2138	1826	3283	3406	2810	2436	2386	5689	4393	2399	8394	1251	1987	2190	8270	2549	1740	3698	2848	2664	8630
88	1457	2423	3130	2169	1072	1001	936	2365	2091	1832	4257	4172	4080	2942	1380	3569	4897	3990	14796	1341	1972	1788	4196	5288	1174	817	1017	1522	2112	1811	3456	3723	2704	2864	2039	5762	4508	2485	8080	1317	2111	2227	7947	1827	1882	3617	2840	2570	8592
89	1567	2520	2641	2008	983	1120	906	2453	2038	1942	4138	4296	3538	3064	1248	3833	5022	4183	15317	1182	1833	1662	4007	5526	1433	806	1037	1770	2184	1926	3450	4101	2706	2966	2208	5915	4157	2440	8146	1227	2249	1973	8035	1667	1851	3564	2741	2570	8661
90	1565	2422	2733	2201	1013	1022	916	2452	1956	2021	4325	4138	4088	3137	1044	3720	4961	4056	14871	1257	1876	1794	3853	5532	1328	882	988	1823	2167	1974	3392	4024	3071	2616	1916	5902	4711	2593	8288	1228	1911	2274	8260	2353	1848	3786	2825	2985	8661
91	1532	2382	2835	2068	981	1113	864	2917	2183	1979	4377	4194	4146	3276	1209	3869	5030	4145	14895	1439	2142	1756	4194	5305	1071	915	1070	1479	2257	1890	3548	3781	2682	2981	2083	5653	4173	2445	8406	1163	2192	2287	8153	2310	1804	3632	2753	2680	8349
92	1721	2433	2653	2160	1002	1010	939	2655	1898	1938	4350	4223	4020	2943	1249	3748	5049	4084	15062	1271	2072	1724	3965	5518	1170	967	1005	1706	2352	1709	3347	3481	2596	3026	2340	5355	4427	2411	7903	1340	2189	2160	8106	1824	1693	3959	2774	2646	8825
93	1704	2621	2854	2323	1082	918	807	2477	1901	1888	4388	4276	3932	2978	1129	3749	5231	3897	14923	1167	2318	1803	4022	5292	1347	878	880	1627	2156	1913	3412	3861	2791	2739	2502	5627	4407	2691	7641	1245	2112	2249	7957	1816	1990	3766	2783	2674	8582
94	1557	2144	2752	2136	920	989	941	2629	2042	2008	4265	4200	3598	3131	1178	3479	5033	3931	15406	1167	2237	1828	4034	5257	1201	801	902	1836	2066	1717	3261	3783	2921	2819	2158	5631	4400	2489	8304	1225	1772	2285	8041	1962	1777	3765	2741	2736	8483
95	1507	2527	2669	2075	1069	984	895	2477	2027	1939	4470	4167	4123	3232	1271	3365	4956	3960	15203	1174	2080	1970	4093	5384	1147	904	973	1681	2217	1854	3154	3807	3083	2859	2146	5647	4493	2361	8522	1170	2135	2002	7866	1764	1536	3993	2757	2571	8274
96	1454	2130	2813	2268	975	971	777	2435	1957	1927	4514	4249	3819	3048	1328	3327	5328	3894	15982	1209	2052	1782	4066	5435	1416	734	998	1758	2182	1634	3152	3922	2812	2766	2304	5625	4304	2427	8344	1113	1927	2092	8153	1953	1917	3818	2978	2597	8657
97	1671	2308	2776	1980	1000	1039	847	2545	2220	2031	4493	3991	3847	2487	1251	3534	5175	3853	15578	1156	2150	1931	4017	5302	1149	904	994	1638	2355	1679	3270	3769	3047	2226	2286	5594	4321	2317	8270	989	1835	2271	8788	1876	1443	3878	2797	2796	8388
98	1726	2489	2833	2286	1033	1115	752	2699	2189	1895	4373	4318	3959	3381	1180	3827	5348	3642	16224	1255	2112	1875	4224	5384	1155	756	1061	1841	2427	1772	3422	3913	2803	2874	2125	5897	4036	2546	8270	1146	1911	2149	8022	1757	1854	4101	2681	2487	8414
99	1475	2334	2706	1954	964	872	874	2665	2029	1993	4180	4132	3917	3253	1200	3239	5186	4005	15714	1244	2047	1759	4047	5396	1119	866	1007	1712	2073	1862	3367	4194	2918	2797	2176	5769	4351	2330	8109	1303	1929	2013	8183	1728	1870	4139	3036	2667	8678
100	1679	2481	3031	2083	1135	1024	803	2807	2050	2066	4135	4351	3884	3372	1222	3834	5213	3941	16048	1094	1941	1677	4201	5248	1245	834	918	1653	2063	1697	3600	3685	2642	2722	2209	5442	4207	2395	8179	1475	2182	2301	8064	2182	1711	3995	2710	2695	8219
101	1600	2442	2763	2093	1118	1037	719	2329	2070	2011	4742	4401	3882	3336	1242	3766	5242	3792	16251	980	2103	1793	4326	5366	1294	700	980	1720	2285	1746	3427	3895	2976	3003	1975	5707	4422	2571	8062	1277	1862	2216	8082	1917	1823	3919	2769	2836	8433
102	1565	2548	2403	2261	1045	864	1015	2295	2057	1975	4527	4167	3737	2920	1302	3737	5374	3648	16180	1080	2255	1841	4275	4925	1190	889	1003	1775	2243	1717	3401	4066	2862	2887	2278	5441	3986	2496	8154	1165	1967	2184	8675	1856	2048	3850	3119	2660	8185
103	1333	2485	2775	2314	848	1002	790	2506	2112	1891	4270	4325	3773	3313	1324	3782	5436	3647	16447	1130	2062	1835	4275	5466	1264	851	1160	1607	2215	1783	3231	3589	2773	2843	2201	5207	4216	2591	7977	896	1916	2337	8696	2353	1877	4031	2935	2618	8414
104	1414	2345	2935	1995	1040	936	893	2432	2118	2012	4295	4206	3552	3315	1355	3823	5286	3665	16206	1150	2149	1865	3932	5227	1325	752	1053	1560	2123	1817	3357	3850	2849	2816	2087	5411	4363	2564	8009	1145	2102	2441	8018	2394	1756	3970	2980	2844	8801
105	1574	2623	2620	2006	1204	949	812	2575	1961	2205	4536	4070	3839	3248	1541	4126	5458	3702	16609	1181	1958	1871	4329	5532	1168	842	884	1743	2176	1769	3246	3739	3114	2812	2000	5284	3954	2424	8313	1056	2056	2301	8156	1946	1893	3920	3074	2802	8666
106	1644	2543	2489	2096	938	1070	889	2141	2078	2008	4299	4046	3464	3093	1453	3807	5408	3607	15749	1180	2109	1750	4191	5494	1164	853	903	1670	2105	1791	3391	3816	2967	2613	2184	5230	4280	2338	8233	1262	2079	2299	8173	1729	1814	3973	2828	2671	8224
107	1478	2530	2482	2212	1147	1012	933	2499	2041	1832	4556	3950	3750	3064	1279	3686	5153	3735	16267	1296	2070	1799	4077	5392	1228	784	1046	1525	2139	1697	3372	3732	2536	2811	1950	5350	4247	2414	8002	1019	2231	2273	8216	1731	1871	3816	2743	2697	8533
108	1587	2585	2405	2120	1095	1111	892	2173	2023	2107	4424	4214	3450	3410	1420	3930	5233	3836	16334	1127	2024	1739	4309	5201	1206	981	1208	1530	2044	1693	3207	3918	2700	2883	2073	5010	4178	2338	8084	1039	2321	2217	8130	1864	1792	3816	2954	2783	8340
109	1715	2455	2579	2223	1125	976	820	2508	2088	2087	4099	4222	3634	3099	1387	4230	5085	3893	16471	1304	1881	1651	4272	5290	1139	768	1014	1708	2059	1708	3270	4144	3012	2759	1978	5508	3787	2379	8154	1133	2335	2385	8158	1743	1661	3906	2901	2665	8616
110	1593	2425	2829	2136	980	1177	940	2463	1940	2155	4507	4567	3782	3193	1211	3724	5325	3689	16116	1235	2053	2006	4021	5342	1192	798	1062	1589	2212	1548	3221	3726	3090	2557	2279	5339	4121	2508	8060	1115	1925	2128	8772	1836	1834	4010	2878	2663	8510
111	1571	2564	2887	2170	821	939	919	2398	2282	1939	4521	4159	3781	3208	1208	3960	5306	3544	16351	1366	2081	1753	4094	5263	1264	784	1168	1482	1995	1675	3261	4019	3137	2848	2210	5294	4193	2330	8270	1031	2349	2470	7700	1790	1573	3989	3017	2698	8530
112	1629	2544	2486	2252	1056	1129	979	2459	2066	2245	4192	4273	3840	3310	1402	3906	5164	3664	16248	1242	1925	1845	4211	5152	1282	830	1062	1596	2110	1686	3378	4072	3124	2869	2149	5167	4097	2317	7948	1322	2283	2314	7942	2230	2018	3947	2773	2473	8395
113	1661	2617	2576	2112	1097	1057	879	2138	2009	2158	4286	4048	3683	3200	1212	3891	5579	3443	15836	1093	1745	1832	4397	5377	1211	856	930	1625	1735	1746	3400	3790	2809	2909	2258	5227	4077	2488	8128	1156	2218	2177	7688	1769	1799	3840	2792	2807	8293
114	1562	2620	2426	2025	1023	933	816	2080	1806	2023	4264	4463	3461	3235	1230	3889	5257	3442	16455	1305	2370	1868	4337	5185	1111	800	1046	1538	1866	2055	3416	3799	2692	2675	2070	5586	4184	2355	7978	1274	2378	2247	7973	1911	1649	4000	2890	2805	8332
115	1440	2669	2669	2105	1158	962	774	2506	2183	2048	4453	4489	3659	3231	1237	3886	5406	3631	16272	1359	1867	1732	4355	5118	1337	803	963	1675	1930	1718	3249	3564	2819	2770	2089	5211	4570	2483	7622	1041	2206	2009	7823	1925	1916	3968	2863	2792	8705
116	1441	2436	2828	2129	1182	931	864	2361	1779	1955	3949	4218	3787	3071	1137	4164	5302	3659	16247	1357	1897	1953	4375	5130	1340	695	1036	1639	1811	1842	3412	3864	2814	2785	1888	5295	4406	2339	8004	1231	2075	2342	8028	1756	1976	3744	2870	2795	8720
117	1571	2610	2659	2067	1058	1080	766	2176	2105	2199	4120	4149	3619	3153	1267	3891	5542	3713	16397	1488	2079	1892	4260	5134	1320	861	1023	1519	1881	1801	3355	3760	2890	2630	1864	5463	4075	2227	8027	1160	2142	2165	8122	1778	1940	3792	2631	2750	8576
118	1501	2534	2735	2170	1143	1021	822	2353	2203	1938	3874	4430	3600	3347	1285	3792	5492	3657	16247	1501	1989	1919	4361	5090	1330	757	1083	1582	2036	1803	3526	3609	3003	2847	2054	5029	4296	2462	8149	1232	2298	2422	8143	2269	1386	3899	2711	2867	8599
119	1628	2606	2821	2168	1104	936	943	2307	2068	2040	4316	4327	3728	3136	1221	3895	5512	3564	16427	1195	2003	1722	4382	4843	1288	712	995	1506	2042	1717	3449	3754	3179	2961	1982	5344	4338	2479	7827	1208	2033	2337	8160	1821	1814	3755	2712	2821	8480
120	1509	2643	2874	2160	1077	971	942	2288	1957	1947	4176	4273	4011	3150	1299	3968	5550	3513	16366	1234	2027	1852	4242	5178	1285	980	1122	1522	2111	1731	3537	3696	2799	2891	1875	4867	4025	2435	7827	1388	2002	2356	7969	1740	1812	3944	2700	2727	8386
121	1668	2626	2996	2184	1131	918	912	2432	1986	2066	4161	4334	4156	2894	1197	3892	5402	3691	15710	1196	1793	1730	4250	5063	1331	805	1199	1405	1815	1760	3373	4021	2871	2781	2027	4971	4011	2445	8162	1144	2096	2266	8314	2185	1850	3820	2721	2810	8735
122	1403	2224	2701	2061	1072	1146	822	2125	2061	1979	4011	4242	4002	3246	1165	3968	5152	3619	16145	1086	2212	1812	4020	5337	1463	731	881	1532	1827	1764	3436	3737	2725	2574	1891	5178	4181	2311	8094	1385	2210	2171	7795	1904	1939	3664	2786	2486	8329
123	1586	2761	2872	2219	1184	949	908	2528	2041	2097	4135	4032	3902	3348	1240	3806	5269	3532	16063	1246	2097	1697	3992	5573	1463	753	1072	1503	2184	1914	3515	3672	2843	2440	1856	5028	4029	2314	8070	1173	1811	2069	8173	1851	1569	4032	2970	2884	8357
124	1664	2232	2468	2210	1244	843	835	2151	1848	1983	4145	4624	3965	3193	1220	3857	5344	3772	15950	1229	2179	1721	4310	4746	1353	899	1115	1772	1994	1953	3436	3845	2524	2846	1979	5212	4325	2298	8154	1301	2003	2217	8503	2287	1849	3873	2683	2746	8313
125	1682	2666	2728	2017	950	985	917	2196	2015	2133	4326	4663	3625	3308	1155	3916	5443	3590	15533	1269	1801	1676	3882	5357	1251	771	1068	1513	1886	1920	3497	3627	2326	2892	2073	4911	3926	2297	8037	1177	1974	2184	7756	1830	1824	3828	2608	2748	8512
126	1596	2660	2803	2290	1213	907	836	2244	2048	1945	4273	4273	3800	3453	1441	3926	5298	3557	15520	1604	1994	1843	4196	5155	1240	883	1026	1707	1918	1701	3396	3742	2438	2228	1760	5138	3789	2514	7932	1418	1991	2280	7989	1845	1914	3936	2768	2852	8677
127	1559	2777	2527	2173	1161	927	822	2059	2090	2018	3876	4086	3949	3475	1163	3900	5187	3419	15954	1536	1929	1877	4201	4990	1159	798	1040	1510	1837	2013	3200	3513	2881	2972	2054	5066	4026	2075	7999	1371	2035	2403	8854	1806	1880	3908	2565	2481	8223
128	1537	2598	2598	2202	1044	925	1072	2242	1900	1965	4240	3765	4123	3552	1297	3981	5251	3594	15632	1220	2110	1649	4160	5132	1378	816	1102	1543	1721	2027	3401	3881	2968	2705	1970	4830	4276	2398	8013	1297	1772	2252	7835	1979	1834	3817	2788	2755	8999
129	1626	2740	2551	2379	1010	1064	949	2383	2011	2023	4071	4125	3668	3427	1330	4084	5461	3645	15643	1160	1777	1643	3837	5048	1343	815	942	1465	1698	2109	3359	3924	3031	2747	2001	5213	4038	2185	7976	1297	2007	2450	8339	1754	1803	3789	2525	2610	8435
130	1587	2690	2515	2420	851	1066	907	2524	2065	1947	4102	3962	3764	3446	1357	3698	5332	3808	15889	1154	1965	1803	4414	4884	1178	862	1109	1640	1671	2087	3747	4052	3030	2784	2006	5287	3901	2317	7995	1514	2090	2329	7881	2037	1668	3775	2649	2828	8164
131	1534	2799	2660	2252	1268	868	994	2206	1965	1904	3850	3997	3710	3541	1188	3933	5323	3560	15679	1304	1957	1796	4135	5115	1252	855	1015	1483	1814	2230	3443	3810	3013	2998	1923	5049	4244	2437	8163	1240	1537	2338	7857	1887	1819	3688	2611	2692	8519
132	1641	2729	2741	2028	1062	1010	906	2045	2079	2285	4026	4446	3668	3663	1284	3992	5130	3600	15597	1085	2085	1712	4299	5079	1368	556	1026	1525	1935	2091	3449	3982	2976	2736	1987	5272	3917	2395	7784	1159	2040	2435	8324	2182	1782	3824	2765	2750	8497
133	1524	2630	2545	2288	1097	925	693	2260	2070	2102	3951	4427	3611	3701	1306	3691	5116	3720	15701	1137	2148	1920	4165	5235	1350	792	1073	1496	1953	2132	3450	3739	2840	2911	2092	5030	3958	2360	7830	1267	2040	2231	7537	2058	1861	3641	2573	2714	8187
134	1716	2768	2866	2408	1189	1065	989	2246	2052	2141	4086	4173	3892	3776	1424	3927	5048	3578	15496	1213	2065	1894	4163	5243	1285	748	1149	1625	1798	2281	3329	3867	2876	3060	1957	5167	3769	2386	7918	1573	1908	2462	7940	1970	1725	3682	2483	2696	8313
135	1520	2860	2833	2028	1003	1055	877	2289	2013	2033	3863	4084	3673	3816	1300	3913	5189	3731	15465	1052	1879	1860	4475	5047	1286	788	1018	1608	2021	2147	3386	3560	2958	3030	1935	4910	4152	2427	7766	910	1978	2490	7886	2343	1794	3769	2674	2624	8781
136	1661	2643	2750	2415	1128	882	969	2337	1887	2070	3919	4139	3669	3866	1317	3948	5136	3738	15633	1217	1945	1772	4170	4976	1272	627	1129	1455	2060	2054	3367	4022	2703	2873	2184	4880	4149	2219	8352	1392	2074	2315	7670	1951	1628	3739	2640	2764	8635
137	1620	2574	2676	2309	910	1027	902	1843	2043	2115	3892	4340	3598	3788	1170	4151	5107	3361	15853	1253	1998	1847	4520	5087	1519	751	921	1637	1722	2104	3533	3903	2858	2965	2126	4620	4034	2292	7768	1338	2045	2296	7852	1700	1584	3862	2701	2746	8558
138	1586	2745	2847	2375	997	976	826	2438	1804	2150	3991	4066	3412	4044	1267	4154	5190	3391	15509	1198	1936	1846	4027	5165	1513	782	875	1606	1823	2125	3444	3560	3112	2808	1901	4905	4531	2215	7734	1241	1801	2313	8124	1915	1530	3806	2595	2826	8304
139	1672	2936	2524	2368	888	891	901	1924	1980	2077	3941	4486	3406	3780	1249	4237	4982	3426	15633	1347	1990	1803	4444	5271	1318	836	1089	1587	1589	2180	3303	3756	3043	2666	1829	4877	4542	2310	8050	1211	2022	2390	7756	1691	1664	3548	2702	2775	8819
140	1584	2905	2901	2441	1047	1010	830	2264	1985	1899	3974	4100	3813	3972	1178	4044	5031	3474	15625	1086	2049	1813	4315	5313	1270	800	843	1576	1750	2129	3513	3812	2849	3018	2247	4827	4258	2226	7997	1281	2017	2329	7813	2236	1638	3609	2957	2694	8637
141	1604	2824	2508	2398	1084	925	746	1927	1800	2067	3817	4136	3668	3897	1338	4064	4890	3526	15761	1118	1928	1933	4169	5144	1445	858	930	1445	1860	2055	3224	3965	2681	2925	2067	4763	4242	2149	8184	1320	2137	2208	7706	1898	1729	3729	2634	2891	8779
142	1657	2992	2660	2522	1138	1029	986	2372	1851	1982	3966	4544	3582	3832	1221	4317	4647	3537	15744	1115	2024	1774	4400	5067	1054	749	1022	1512	1808	2230	3275	3534	2941	2923	2301	4709	4738	2307	7983	1207	2158	2361	8198	2286	1670	3597	2819	2328	8412
143	1496	2407	2561	2483	953	1016	985	2234	1934	1913	3823	4197	3573	4029	1290	4218	4739	3611	15751	1204	2037	1738	4117	5118	1353	895	957	1438	1940	2081	3490	3988	2701	2483	2293	4962	4185	2245	7976	1246	2089	2328	8101	1770	1776	3745	2455	2632	8418
144	1628	2631	2962	2483	1055	899	869	2093	1849	1830	3925	3967	3682	4106	1285	4023	4939	3622	15635	1220	2053	1645	4286	5096	1672	926	979	1493	1659	2091	3427	3747	2541	2857	2311	4957	4775	2442	7942	1378	2008	2389	7592	1848	1576	3508	2594	2829	8472
145	1740	2946	2925	2483	1004	745	815	2164	1706	1932	3784	3992	3723	3891	1472	4260	4984	3602	15846	1215	1918	1872	4093	4879	1626	711	1054	1300	1849	1862	3636	3538	3037	2797	2273	4695	4586	2365	7775	1285	2109	2296	7986	1797	1738	3605	2587	2882	8699
146	1676	2811	2781	2282	966	891	823	2396	1844	1963	3805	4247	3842	3871	1576	4244	4885	3691	15615	1263	1904	1801	4270	5084	1303	671	1112	1650	1832	2139	3420	3835	2734	2701	2378	4812	5159	2240	7907	1151	2027	2384	7757	1852	1635	3570	2589	2683	8290
147	1598	2859	2967	2524	1184	893	831	2173	1595	2224	3750	4418	3406	3961	1129	4363	4600	3567	15615	1230	1952	1937	4248	5288	1493	644	1127	1458	1881	1990	3181	3645	3121	2750	2283	4789	4532	2233	8089	1280	1725	2315	7931	2250	1764	3612	2659	2524	8407
148	1648	3024	2819	2458	1102	883	739	1981	2002	1865	3654	4142	3615	3639	1468	4084	4933	3636	15770	1316	1917	1751	4218	4953	1627	634	1015	1480	1852	2135	3389	3794	2636	2885	2353	4823	4834	2418	7437	1123	1969	2467	8460	1783	1754	3563	2414	2744	8608
149	1716	2909	2977	2667	1058	1181	665	2035	1775	1843	3520	3963	3615	3785	1280	4001	4820	3612	15726	1194	1951	1781	4363	5017	1755	836	1233	1216	1724	2104	3484	4088	2709	2898	2457	4668	4546	2324	7859	1334	1756	2241	8278	2396	1691	3720	2604	2917	8723
150	1522	2763	2938	2589	1195	899	771	2186	1840	1937	3534	4261	3466	3867	1319	4423	4850	3657	15949	1309	1930	1726	4232	5014	1318	769	1121	1682	1817	1927	3429	3781	3029	2841	2340	4977	4953	2279	7666	1199	1986	2311	7820	1851	1761	3647	2552	2757	8975
151	1763	2792	2854	2556	1100	988	963	2308	1880	1901	3870	4045	3653	3863	1230	3929	4747	3569	15981	1232	1917	1675	4221	5165	1372	835	1234	1548	1967	2043	3312	3395	2735	2942	2261	4304	4908	2299	7919	1221	1929	2316	7963	1955	1695	3585	2666	2812	8865
152	1597	2441	3096	2457	1160	876	763	1874	1685	1916	3797	4129	3519	3881	1271	4397	4732	3744	15472	1307	1936	1711	4149	4964	1342	913	1043	1301	1708	2009	3391	3678	2961	3002	2437	4823	4933	2430	7978	1357	1824	2273	8378	1809	1936	3412	2801	2699	8484
153	1727	2556	2955	2520	1108	1122	864	1934	1922	2070	3640	4132	3790	3776	996	4673	4770	3778	15862	1229	1742	1686	4159	5054	1285	646	1244	1361	1893	2064	3658	3703	3124	2924	2306	4589	4907	2196	7915	1292	2084	2393	8110	1841	1813	3515	2514	2636	8917
154	1598	2672	2731	2573	1015	963	795	2266	1822	2168	3736	4327	3732	3906	1329	4548	4501	3827	16092	1055	1912	1604	4036	4999	1368	815	1054	1389	1613	1883	3727	3614	2861	2955	2466	4420	4431	2104	7610	1127	1590	2345	8293	1919	1674	3489	2767	2792	8927
155	1857	2630	2779	2597	1139	1059	831	2200	1867	1890	3670	4011	3326	3848	1227	4544	4687	3771	15880	1247	1898	1867	4139	5103	1509	698	1177	1625	1946	2131	3456	3804	2826	2610	2341	4687	4746	2125	7763	1209	2071	2117	7638	2241	1785	3602	2840	2844	8902
156	1558	2723	2751	2696	1064	1015	865	1863	1877	1995	3868	4222	3528	3549	1439	4462	4823	3364	15743	1136	1807	1750	4090	4631	1557	806	1022	1382	1497	1890	3475	3948	2446	2901	2125	4496	4956	2236	7531	1181	1954	2218	7580	2412	1396	3420	2571	3018	9002
157	1726	2441	2390	2663	1189	1008	904	2102	1798	1992	3673	4097	3621	3689	1243	4523	4677	3549	16108	1288	1792	1616	3990	4987	1381	846	992	1363	1788	2080	3676	3807	2763	2529	2463	4689	4884	2224	7689	1197	1905	2206	7613	2074	1718	3198	2699	2803	8866
158	1487	2469	2986	2759	1011	826	955	2223	1559	2039	3490	4226	3516	3444	1130	4484	4840	3813	15929	1271	2102	1860	4422	5120	1558	702	994	1582	1632	2228	3728	3783	2845	3105	2569	4581	4577	2332	7511	1253	1981	2003	7855	1700	1344	3416	2711	3050	9089
159	1626	2825	3082	2677	958	928	834	2333	1735	1931	3905	4140	3617	3809	1426	4531	4549	3595	16210	1227	1973	1646	4134	4851	1518	840	1012	1495	1718	2154	3289	3720	3188	2856	2666	4455	4810	2134	7764	1195	1719	2116	7944	1804	1721	3352	2696	3091	9104
160	1574	2788	2672	2648	1051	1002	875	1907	1735	1890	3387	3986	3477	3947	1272	4674	4519	3788	16154	1127	1787	1947	4271	5077	1458	645	1062	1651	1534	2180	3522	3765	2646	3046	2684	4690	4126	2143	7935	1531	1853	2173	8045	2300	1688	3468	2824	2906	9135
161	1783	2867	2821	2478	1133	1036	841	1892	1826	2030	3866	4110	3502	3882	1235	4584	4667	3682	15707	1271	1801	1586	4298	4562	1354	725	1097	1480	1645	2176	3269	3760	2726	3087	2659	4483	4725	2138	7924	1158	1605	2188	7811	1834	1492	3354	2459	2938	9369
162	1554	2541	2611	2559	1149	1034	957	2012	1535	1988	3840	4214	3523	3754	1224	4425	4582	3911	16230	1346	2026	1736	4278	5033	1554	724	1214	1363	1672	2113	3512	3697	2969	3121	2611	4526	4560	2118	7977	1163	1708	2133	7788	1805	1626	3767	2610	2941	8850
163	1707	2736	3031	2323	1086	781	1004	2079	1873	2020	3413	4197	3489	3708	1237	4177	4441	3689	16106	1279	1839	1843	4093	4767	1293	685	970	1459	1857	2037	3462	3929	2607	2986	2456	4229	4823	2203	7547	1172	1862	2364	7634	1973	1684	3631	2582	2988	9201
164	1592	2733	2961	2475	980	1079	868	2178	1693	1994	3830	3593	3875	3862	1313	4432	4820	3888	15852	1174	2008	1628	4335	5227	1602	713	1086	1497	1680	2000	3589	3730	3054	2792	2470	4556	4139	2147	7898	1338	1831	2086	7613	1775	1611	3459	2512	2983	9114
165	1704	2608	2977	2622	1153	1035	883	2104	1849	1977	3711	4286	3518	3754	1367	4492	4381	3714	16020	1149	1929	1906	4284	4715	1601	837	1066	1434	1934	2140	3369	3856	2989	2590	2045	4452	4252	2137	7448	1308	1843	2177	7862	1679	1626	3469	2603	2925	8998
166	1738	2682	3067	2443	995	1114	902	1929	1728	2070	3617	3581	3639	3813	1199	4404	4371	3805	16067	1094	2121	1712	3983	4927	1348	862	1027	1520	1638	2162	3268	3817	2591	3003	2492	4463	4560	2156	7509	961	2082	2129	7819	1726	1585	3259	2493	2876	9166
167	1552	2728	2810	2608	1080	850	815	2051	1681	2079	3701	4237	3445	3704	1044	4544	4500	4054	16209	1228	1873	1695	4256	5266	1399	919	1114	1524	1747	2123	3673	3817	2955	2851	2028	4638	4673	2234	7619	1359	2060	2208	7820	2075	1615	3461	2635	3212	8721
168	1655	2592	2900	2518	1233	974	772	2076	1799	1824	3721	4213	3573	3867	1337	4408	4568	3853	16120	1194	1964	1733	4315	4941	1381	947	1182	1343	1654	2051	3486	3671	2949	2904	2311	4432	4454	2225	7781	1358	2026	2080	7577	1756	1690	3410	2580	2694	8600
169	1630	2528	2778	2463	1154	908	797	2127	1900	2002	3809	4119	3515	4008	1341	4264	4482	3849	16065	1059	2048	1901	4502	5059	1462	734	1102	1462	1672	2250	3421	3762	2774	2918	2457	4340	4457	2323	7542	1239	1969	2272	7955	1968	1749	3602	2361	2925	9298
170	1616	2475	3152	2492	1037	807	988	2033	1836	2018	3653	4115	3472	3937	1364	4358	4353	4021	15943	1289	1791	1831	4425	5078	1293	852	1067	1602	1704	2121	3191	3846	3102	3108	2094	4354	4349	2443	8008	1453	1731	2375	7586	1600	1492	3417	2406	2746	8974
171	1568	2672	3231	2449	1018	823	858	1823	1819	1957	3783	4158	3642	3858	1247	4289	4456	3972	15882	1263	1956	1709	4630	5331	1407	969	955	1409	1678	2126	3537	3813	2880	2944	2357	4445	4333	2283	7568	1411	2093	2225	7476	1682	1686	3490	2454	2941	9099
172	1578	2823	3078	2505	1185	1017	914	2106	1796	2042	3541	4326	3510	3726	1253	4187	4486	3836	15990	1205	1893	1758	4686	5051	1617	1001	951	1548	1668	2141	3440	3689	2584	2584	2460	4427	4555	2383	7760	1289	1947	2219	7967	1827	1595	3203	2312	2760	8968
173	1519	2584	3101	2306	1106	1087	1001	1692	1662	2140	3829	4389	3755	3841	1289	4428	4453	4031	15594	1323	1889	1975	4481	4977	1492	685	978	1495	1763	2224	3401	3689	2679	3147	2155	4281	4629	2323	7472	1179	1851	2186	7626	2260	1453	3386	2612	2742	8805
174	1599	2802	3056	2395	1037	824	809	1766	1547	2110	3542	4326	3763	3754	1323	4436	4494	4098	16195	1248	1772	1867	4519	5397	1447	826	946	1431	1691	2179	3412	3770	2818	3320	2437	4213	4587	2373	7698	1269	1811	2225	7607	2249	1662	3441	2392	2927	8954
175	1608	2547	3199	2621	1119	1068	957	1933	1892	2037	3755	4556	3495	3552	1222	4195	4600	3944	15814	1357	1840	1722	4461	4889	1322	687	951	1473	1362	2031	3392	3633	2775	2746	2595	4302	4812	2096	7892	1284	2001	2332	8060	2008	1624	3489	2456	2789	8838
176	1577	2673	2990	2380	1257	1094	862	1801	2031	2030	3543	4492	3767	3886	1261	4356	4258	4158	15690	1384	1872	1682	4227	4935	1378	584	1096	1351	1603	2133	3278	4057	2514	2869	2280	4411	4393	2200	7827	1215	2236	2254	7971	2017	1582	3495	2467	3008	8959
177	1668	2665	2970	2398	1145	1029	813	2006	1815	2039	3675	4597	3738	3969	1160	4492	4570	3799	15672	1208	1898	1742	4213	5070	1684	688	1068	1551	1528	2078	3619	3537	2921	2774	2427	4637	4666	2157	7594	1266	2041	2308	7881	2281	1685	3408	2318	2904	9072
178	1445	2441	2793	2339	1064	1044	848	1867	1956	2058	3596	4330	3640	3534	1348	4164	4404	4134	15925	1305	1786	1689	4382	4812	1678	727	976	1550	1672	2241	3527	3377	2988	2893	2470	4316	4450	2259	7877	1618	1898	2234	7935	1999	1658	3331	2494	2709	8978
179	1573	2431	2986	2368	985	1068	896	2006	2001	2032	3906	4691	3573	3783	1333	4364	4773	4161	16132	1109	2042	1671	4320	5006	1583	938	1081	1571	1738	2160	3407	3984	2754	2708	2307	4476	4436	2134	7870	1406	1900	2497	8016	1701	1768	3365	2445	2843	8776
180	1642	2291	2834	2390	1246	1031	796	2103	1946	2183	3641	4375	3458	3749	1314	4450	4789	4051	15641	1409	2178	1753	4611	5073	1766	686	924	1456	1446	2069	3471	3579	2821	3013	2438	4344	4815	2172	7638	1359	1823	2112	7953	1686	1531	3391	2535	2991	8974
181	1649	2689	3112	2529	1273	1029	784	1979	1947	2149	3492	4242	3461	3867	1186	4450	4901	4148	15907	1216	1742	1665	4346	4958	1933	932	942	1561	1663	2250	3297	3885	2804	2993	2468	4532	4706	2251	7654	1568	1976	2435	8020	2050	1540	3211	2100	3132	8955
182	1639	2421	3174	2361	1223	1015	939	1775	1890	2087	3782	4529	3804	3605	1250	4387	5012	3987	15664	1439	1683	1799	4477	5053	1600	806	1024	1626	1538	2029	3374	4048	2354	2835	2622	4512	4729	2138	7645	1271	1998	2396	8073	1683	1630	3384	2387	2961	8666
183	1603	2443	3075	2392	1099	1119	768	1914	2025	1946	3578	4661	3588	3512	1229	4585	4729	4302	15787	1241	1876	1721	4592	4947	1877	776	1009	1410	1515	2062	3606	3792	2895	3038	2810	4397	4623	2321	7481	1398	1803	2276	7889	2273	1628	3220	2509	2853	8994
184	1728	2285	3398	2487	1119	826	964	1997	1906	2177	3433	4842	3453	3554	1123	4518	4797	4000	15682	1343	1857	1928	4845	5080	1634	624	1032	1491	1402	2319	3496	3852	2970	2739	2571	4517	4232	2278	7557	1207	1995	2229	7846	2119	1593	3439	2442	2916	9159
185	1585	2782	3509	2490	1047	987	827	2009	1991	2101	3332	4538	3600	3800	1278	4495	4692	4237	15200	1404	1869	1611	4593	5123	1582	825	1011	1416	1537	2063	3400	3726	2833	2862	2498	4343	4278	2153	7698	1185	1943	2175	7865	1700	1435	3301	2459	2900	8777
186	1565	2580	3100	2316	929	977	738	1932	1915	2025	3472	4668	3424	3465	1572	4584	4816	4244	15718	1307	1843	1630	4768	5131	1771	660	848	1478	1724	1917	3385	3854	2448	2896	2514	4494	4501	2066	7402	1253	1992	2319	7938	2096	1610	3179	2527	2754	9053
187	1597	2554	3526	2573	884	1151	893	2162	2097	2003	3737	4493	3473	3761	1470	4657	4447	4125	15782	1441	1702	1819	4807	5173	1565	784	1022	1553	1529	2109	3598	3907	2906	3013	2437	4370	4584	2352	7796	1303	1814	2163	7764	2216	1689	3412	2205	2667	8936
188	1684	2621	3250	2588	1142	916	794	2190	1947	1957	3559	4529	3551	3711	1187	4597	4651	4013	15767	1288	1928	1793	5046	4996	1811	741	970	1449	1471	2065	3316	3827	2660	2980	2530	4449	4413	2202	7533	1271	1776	2334	8007	2214	1444	3438	2653	2877	8532
189	1637	2829	3487	2671	1096	807	912	2216	1938	1952	3576	4398	3493	3264	1115	4772	4633	4205	15320	1341	1776	1776	4840	5109	1582	787	1086	1557	1480	1934	3408	3757	2902	2630	2182	4346	4204	2262	7664	1197	1797	2354	7846	2266	1511	3145	2337	2751	7378
190	1643	2547	3674	2607	1099	841	701	2001	2019	2039	3606	4510	3575	3404	1347	4630	4246	4012	15513	1341	1657	1608	4740	4875	1612	789	988	1558	1474	2057	3551	3772	2581	3086	2743	4538	4275	2085	7744	1087	1986	2324	7991	1698	1523	3364	2540	2805	8890
191	1571	2454	3495	2369	1148	890	769	1982	1963	2169	3543	4533	3366	3698	1122	4697	4465	3893	15502	1328	1707	1783	4659	5047	1638	693	1061	1533	1489	2264	3531	4060	2929	2495	2428	4352	4456	2053	8000	1161	1664	2435	8823	2039	1587	3257	2593	2944	8927
192	1429	2567	3585	2560	1069	971	758	1926	2060	1980	3658	4065	3456	3761	1225	5018	4523	4157	15278	1415	1913	1822	4725	4938	1562	837	1087	1481	1488	2101	3621	3893	2850	3123	2524	4338	4107	2073	7692	1417	1829	2572	7625	1960	1836	3291	2604	2876	9074
193	1746	2713	3379	2576	1151	1070	741	2069	2050	2131	3649	4582	3348	3724	1173	5063	4670	4148	15725	1406	1930	1812	4895	4951	1689	747	1076	1372	1586	2235	3558	4021	2824	3090	2545	4571	4737	2297	7754	1047	1653	2183	7990	1683	1427	3286	2761	2857	9099
194	1611	2636	3705	2568	1061	1016	726	1926	2147	2016	3669	4105	3392	3857	1351	5174	4406	4086	15544	1215	2013	1747	4434	4844	1745	729	1021	1394	1400	2120	3552	3686	2811	2903	2465	4458	4705	2309	7465	1148	1648	2381	7891	1789	1434	3000	2481	2942	8721
195	1484	2623	3826	2585	1043	725	822	1984	1977	2001	3392	4449	3551	3839	1512	4969	4571	4012	15911	1291	1913	1783	4232	5269	1671	865	1044	1512	1593	2086	3408	3769	2653	3118	2698	4381	4233	2277	7563	1306	1769	2283	8125	2211	1399	3378	2436	3002	8897
196	1756	2348	3618	2721	1152	1032	758	2138	2148	2012	3381	4204	3549	3843	1196	4966	4209	4116	15549	1344	2039	1684	4445	5201	1553	853	975	1528	1597	2086	3457	3921	2951	3041	2489	4416	4202	2079	7675	1316	2066	2385	7832	1892	1512	3267	2607	2923	9157
197	1549	2739	3436	2629	1076	1030	840	2093	1958	2204	3680	4366	3495	3329	1333	5057	4671	4275	15307	1345	1927	1746	4383	5187	1719	743	989	1435	1749	2267	3347	3485	2497	2908	2296	4409	4163	2198	7501	1275	1998	2307	8227	1806	1461	3184	2737	2916	8912
198	1541	2814	3949	2593	1103	952	773	1687	1931	1986	3538	4525	3444	3502	1372	4994	4644	4251	15702	1527	1892	1859	4167	5260	1519	737	1044	1490	1535	2145	3481	3854	2852	3179	2623	4239	4638	2246	7584	1197	1728	2384	7799	1952	1549	3146	2248	2981	9158
199	1665	2682	3705	2599	1263	1038	787	1975	2111	1968	3460	4383	3494	3611	1195	5033	4825	3916	15366	1216	1817	1751	4114	5164	1582	735	929	1349	1492	2093	3384	3896	3008	2997	2387	4329	4362	2181	7447	1189	1695	2512	7817	2124	1585	3258	2280	3140	8881
200	1712	2615	3692	2726	1288	1026	906	2011	2013	1927	3342	4419	3209	3497	1067	5178	4617	4118	15294	1379	1856	1736	4263	5235	2152	822	1013	1540	1442	2128	3241	3542	2620	3146	2357	4301	4496	1997	7490	1376	1951	2485	7949	2072	1424	3170	2480	2834	7688
201	1579	2424	4011	2659	1210	1174	793	1643	2244	2179	3701	4592	3431	3696	1237	5452	4715	4042	15612	1425	1767	1898	4267	5283	1566	673	1076	1554	1451	2021	3575	3853	2933	2769	2365	4166	4299	2099	7404	1341	1830	2276	8166	2037	1549	2891	2539	2861	8953
202	1689	2722	3913	2687	1219	1164	849	2230	2018	2147	3579	4325	3241	3279	1125	5186	4613	4154	15718	1422	1976	1696	4354	5272	1609	835	967	1397	1804	1938	3405	4026	2869	2815	2407	4454	4482	2045	7346	1164	1835	2439	8025	1809	1382	3166	2392	2808	8892
203	1554	2570	3944	2752	1263	1085	944	1990	1928	1835	3717	4305	3360	3741	1268	5214	4810	4112	15758	1189	1860	1439	4519	5030	1890	634	973	1529	1549	2068	3185	3743	3166	2487	1994	4415	4561	1965	7616	1346	1959	2427	8017	1697	1518	3035	2238	2861	9064
204	1626	2586	4099	2547	1033	1134	1034	1944	1890	2075	3457	4092	2959	3495	1237	5173	4444	4208	15879	1459	1563	1840	4206	5154	1748	772	796	1586	1484	2102	3014	3671	2920	3074	2435	3958	4059	2047	7382	1254	2042	2371	8049	2191	1528	3083	2514	2866	8796
205	1636	2697	4093	2667	1139	1166	867	1960	1775	1838	3438	4134	3723	3547	1202	5175	4585	3934	15407	1272	1768	1640	4172	5407	1804	691	961	1436	1472	2050	3118	3621	2945	2781	2230	4104	4435	2108	7480	1096	1863	2561	8024	1853	1515	3226	2284	2999	8707
206	1787	2616	3974	2692	1173	1044	785	2327	1919	2023	3487	4142	3212	3660	1314	5350	4467	4230	15996	1510	1762	1512	4219	5173	1754	714	1049	1473	1632	1930	3274	3355	2939	2774	2241	4252	4213	2119	7353	1156	2038	2417	7731	2027	1634	3203	2396	3089	8837
207	1583	2879	3926	2693	1300	1052	877	2019	1940	1915	3489	4360	3049	3606	1379	4996	4529	4154	15519	1237	1614	1815	4413	5268	1740	694	1150	1529	1592	1976	3337	3583	2737	2937	2442	4471	4397	1997	7542	1258	1760	2430	7792	1804	1690	2918	2430	3274	8831
208	1462	2762	4066	2355	1061	1193	803	2132	2028	1912	3482	4121	3353	3634	1218	5259	4621	4171	15343	1399	1669	1668	4173	5231	1726	849	949	1471	1564	1878	3264	3712	2607	2875	2162	4259	4234	2182	7255	1281	1971	2586	7881	2195	1637	3483	2377	2997	8877
209	1559	2824	4330	2698	1165	1193	903	2108	1900	1773	3374	3775	3184	3814	1174	5285	4532	3762	16052	1331	1964	1748	4224	5077	1579	786	940	1337	1574	2008	3300	3607	2561	2522	2255	4443	4357	1936	7708	1346	1656	2360	7865	1703	1473	3291	2253	2883	8767
210	1600	2874	3835	2662	1310	881	868	2055	2047	2117	3477	4332	3192	3865	1249	5220	4617	3816	15531	1319	1665	1550	4650	4832	1834	966	1128	1392	1565	1985	3103	3343	3004	2784	2294	4500	4348	2194	7409	1404	2085	2621	7865	1965	1517	3279	2364	2807	8772
211	1474	2740	3947	2826	1186	1110	837	2088	1970	1977	3240	4216	3079	3634	1197	5360	4511	3988	15528	1223	1715	1694	4180	4987	1700	780	971	1227	1422	2092	3109	3872	2703	2765	2185	4291	4186	2138	7184	1267	1941	2442	7996	1712	1764	3231	2678	2938	9036
212	1608	2826	3822	2365	1271	1170	834	1913	1881	1936	3511	4150	3161	3690	1269	5223	4383	3931	15507	1369	1777	1793	4339	5070	1882	706	1180	1375	1581	1998	3158	3506	2651	2704	2113	4244	4868	2156	7350	1342	1681	2342	8614	2238	1678	3331	2545	2897	8775
213	1523	2783	4089	2564	1226	1053	884	2040	1861	2097	3446	3970	3144	3549	1376	5051	4379	3734	15859	1451	1754	1906	4034	5027	1943	832	1208	1405	1776	2009	3165	3633	2944	2723	2338	4472	4544	2083	7227	1178	1978	2511	8124	2164	1844	3117	2564	2964	8993
214	1639	3094	3548	2704	1126	1042	890	2128	1848	2112	3430	4131	3215	3662	1252	5287	4473	3756	15287	1399	1633	1565	3972	4953	1673	888	1082	1413	1672	2005	3037	4037	2663	2640	1988	4263	5010	2174	7461	1269	1871	2602	8064	2190	1549	3269	2428	2664	8778
215	1633	2860	3435	2711	1134	996	953	2306	1985	2002	3545	3941	3328	3694	1230	5357	4547	3825	15815	1492	1764	1633	4072	4994	1757	906	1093	1384	1626	1946	3390	3649	2866	2678	2468	4102	4581	2167	7396	1208	1707	2703	8469	2063	1464	3204	2317	2908	8986
216	1646	2664	3588	2610	1163	934	861	1859	1959	2068	3577	3874	3237	3580	1259	5476	4479	3706	15796	1464	1816	1677	4038	5037	1791	921	1035	1305	1576	2163	3415	3708	3024	2528	2020	4212	4565	1964	7308	1209	1913	2513	8237	1672	1579	3132	2467	2976	8838
217	1559	2647	4023	2725	1200	1094	937	2045	1950	2107	3915	4339	3436	3378	1258	5397	4233	3560	15427	1310	1880	1726	4134	4884	1725	775	1074	1459	1547	1867	3220	3715	2702	2476	2260	4383	4691	2039	7070	1290	1682	2644	8393	2138	1764	3421	2340	2926	9345
218	1502	2861	3781	2756	1220	1094	837	1807	1835	1997	3634	4323	3399	3486	1251	5469	4377	3872	15578	1417	1868	1944	4115	5230	1681	714	946	1337	1581	1923	3226	3820	3078	2925	2616	4527	5444	2363	7498	1125	1739	2604	8179	1991	1536	3139	2376	3104	8721
219	1572	2950	3537	2667	1339	1272	762	2198	1854	1937	3699	3947	3361	3463	1270	5708	4575	3908	15868	1696	1882	1816	4000	5044	1890	696	985	1539	1335	2149	3389	3755	2837	2786	2611	4135	5108	2151	7050	951	1592	2603	8158	2060	1575	3255	2349	2831	8867
220	1808	2645	3831	2708	1100	1046	919	2117	1918	2080	3736	4078	3363	3527	1243	5693	4522	3928	15455	1377	1821	1636	4090	4914	1596	804	1117	1543	1483	1925	3466	3196	2902	2413	2644	4159	5565	2079	7654	1407	1768	2491	8036	1760	1511	3316	2335	3126	8643
221	1424	2555	3999	2770	1083	1017	766	2214	2064	1879	3581	4290	3295	3443	1358	5334	4351	3967	15368	1437	1742	1740	4046	4958	1780	841	1037	1434	1452	2213	3224	3586	2866	2959	2634	4190	5367	2104	7179	1172	1710	2223	8241	1695	1839	3173	2307	2895	8805
222	1873	2588	3921	2734	1074	1037	849	2207	1894	1822	3488	4267	3430	3573	1249	5546	4522	4025	15308	1389	1863	1869	4255	4891	1784	772	1070	1458	1491	2047	3122	3726	2822	2466	2763	4253	4914	2028	7198	1266	1709	2349	8274	2144	1579	3227	2449	2965	8657
223	1398	2658	3589	2674	1227	1227	730	1928	2045	2040	3301	3796	3365	3492	1396	5606	4385	3710	15567	1589	1821	1614	4016	4853	1659	665	1098	1541	1584	2048	3239	3254	2804	2899	2726	4333	5040	2140	7365	1002	1873	2494	8211	1966	1722	3185	2274	2751	8857
224	1635	2493	3643	2768	1111	1242	811	1921	1806	2087	3382	4488	3490	3427	1209	5588	4447	3983	15782	1513	1778	1830	4060	4806	1649	588	948	1402	1348	2085	3160	3867	2530	2357	2720	4037	5044	1969	7147	1188	1850	2325	8258	2096	1602	3384	2376	2958	8776
225	1555	2577	3829	2736	1079	969	789	2343	2025	2215	3306	4040	3223	3665	1289	5577	4226	3927	15329	1476	1776	1761	3914	4996	1886	682	1054	1418	1348	2018	3161	3697	2763	2364	2851	4468	5031	2102	7245	1204	1599	2305	8173	2204	1708	3325	2321	2964	8850
226	1726	2717	3809	2613	1226	1158	961	2095	1917	1897	3247	4163	3100	3679	1197	5678	4303	3527	15460	1394	1878	1620	3677	4798	1658	845	1051	1206	1248	1808	3506	3849	2865	2616	2951	4140	4939	2063	7205	1120	1795	2307	8884	2230	1653	3362	2299	2734	8740
227	1719	2775	4061	2650	1231	1212	740	1901	1779	2077	3599	4088	3171	3533	1501	5580	4260	3887	15297	1480	1877	1738	3962	5009	1690	571	1047	1432	1507	2084	3500	3629	2958	2758	2582	4120	5042	2027	7590	1281	1768	2453	8278	2000	1538	3312	2253	2644	8596
228	1503	2410	3919	2647	1096	1201	938	1845	2005	2080	3360	3855	3146	3683	1561	5678	4111	3719	15256	1381	1817	1871	4111	4907	2032	761	1199	1341	1254	2077	3360	3342	2593	2958	2295	4153	4797	2063	6886	1153	2009	2571	8297	1900	1591	3297	2120	3031	8816
229	1664	2808	3709	2646	1214	864	808	1851	1860	2307	3582	4303	3239	3526	1414	5588	4502	4026	15102	1244	1947	1812	4123	4936	1924	719	1060	1446	1367	2068	3366	3614	2784	2709	2495	3952	5168	2083	7407	1294	1651	2480	8298	2162	1509	3416	2186	2949	8876
230	1629	2632	3847	2757	1321	1022	888	1782	1705	2181	3447	3767	3180	3579	1180	5683	4287	3779	15508	1405	1720	1677	3972	4819	1688	652	1118	1495	1275	2089	3283	3427	2627	2635	2719	4212	5028	2070	7197	1172	1848	2209	8601	2041	1524	3521	2185	2977	9091
231	1525	2673	3516	2543	1100	1230	785	2276	1956	2034	3213	4081	3144	3315	1300	5793	4200	3834	14915	1509	1895	1952	4123	4960	1888	738	1192	1435	1582	2218	3340	3736	2861	2677	2407	3880	5211	1935	7431	1144	1658	2521	8362	1819	1329	3242	2247	2926	8929
232	1666	2298	3735	2685	1219	1046	778	1740	2083	2228	3365	4085	3052	3707	1091	5560	4624	4095	15567	1288	1733	1712	4087	4723	1745	755	1143	1289	1438	1992	3161	3771	2481	2710	2026	3985	5008	2123	7177	1231	1668	2380	8623	1606	1795	3332	2426	2747	9037
233	1588	2891	3428	2634	1105	958	968	2038	1982	2259	3368	4188	3353	3412	1266	5592	4247	3725	15013	1527	1887	1639	4028	4964	1653	603	975	1526	1479	2089	3401	3694	3153	2722	2495	4193	4550	2198	6777	1294	1888	2280	8226	2056	1753	3452	2337	2603	8872
234	1614	2792	3741	2612	1158	973	683	2106	1918	2159	3205	4063	3015	3409	1317	5683	4451	3814	15249	1358	1889	1657	3898	5046	1725	818	1104	1296	1545	2194	3360	3623	2611	2640	2456	4108	4750	2103	7305	1342	1733	2293	8530	2072	1528	3487	2205	3074	8655
235	1768	2275	3980	2526	1152	1164	707	2038	2011	2150	3047	3819	3004	3356	1168	5938	4318	3814	15383	1309	1704	1676	3912	4479	1955	548	1101	1473	1501	1938	3194	3948	2512	2875	2616	3947	4615	2000	7301	1013	1779	2195	8101	2090	1591	3239	2250	2830	8886
236	1399	2533	3663	2726	1189	984	869	2077	1758	2075	3204	3942	3222	3379	1304	5792	4253	3793	14951	1406	1799	1615	4185	4966	2103	624	1193	1225	1503	2226	3307	3705	2537	2588	2634	3875	4924	2017	7262	749	1635	2343	7964	2062	1342	3176	2247	2850	8813
237	1552	2375	3386	2661	1048	1215	770	2052	1997	2220	3369	4181	3150	3233	1067	5974	4481	3625	15186	1375	1710	1711	4189	4682	2100	594	1011	1558	1425	2117	3275	4020	2615	2388	2595	4159	4685	2062	7090	925	1823	2519	7823	2068	1642	3270	2372	2993	8905
238	1387	2771	3545	2776	1084	1117	910	1943	1850	2135	3332	3669	3276	3384	1262	5807	4159	3711	15390	1280	1839	1792	4080	4621	2095	799	1132	1263	1370	1868	3620	3594	2823	2655	2521	4267	5226	2025	7167	1041	1902	2227	8384	2049	1461	3349	2138	2875	8797
239	1535	2400	3675	2716	1112	1109	889	1833	1869	2120	3083	4203	3280	3176	1227	6060	4384	3721	15143	1494	2006	1761	4019	4811	1653	845	1066	1440	1485	1961	3379	4056	2883	2574	2725	4119	5032	2053	7185	1504	1724	2437	8268	2112	1375	3242	2079	2887	9049
240	1678	2604	3746	2756	965	1238	864	2252	1794	2041	3387	3637	3251	3287	1208	6047	4422	3867	15007	1408	1699	1799	4209	4886	1970	654	1127	1548	1424	2106	3133	3579	2588	2529	2552	4018	4733	1973	7200	1249	1835	2488	8495	2070	1428	3489	2168	2839	8947
241	1832	2504	3495	2702	1179	1167	851	1744	1990	1947	3208	3919	3101	3223	1329	6046	4314	3717	14965	1321	1711	1945	4194	4801	1723	659	1054	1369	1607	2007	3257	3570	2782	2592	2565	4109	4963	1919	7340	1306	1912	2276	8302	2118	1434	3264	2005	3082	9122
242	1664	2299	3993	2789	969	1085	746	1910	2004	2116	2999	3746	3500	3125	1128	5959	4354	3506	14765	1307	1998	1619	4004	4999	1934	771	907	1432	1691	1983	3314	3374	2909	2333	2786	4126	5244	1963	7254	1272	1672	2526	8295	2097	1399	3173	2045	2965	9013
243	1564	2774	3631	2833	1299	948	824	2250	2129	1998	2965	3896	2966	3348	1043	5935	4338	3837	15207	1378	1813	1667	4063	4886	2147	760	1046	1530	1459	2004	3449	3759	2744	2601	2633	4059	5245	1974	7116	1301	1572	2350	8482	2003	1382	3510	1751	3042	9271
244	1460	2588	3836	2770	1130	1280	851	2049	2042	1944	3226	3975	3013	3227	1167	6049	4409	3674	14825	1318	1624	1684	3916	4982	1634	601	1164	1664	1572	1903	3403	3820	3012	2446	2769	4193	5528	2234	7140	1241	1824	2510	8296	1919	1433	3077	2107	2783	8914
245	1425	2416	3618	2660	939	881	913	2271	2063	1964	3396	4031	3193	3222	1088	6078	4334	3871	14887	1390	1699	1789	4142	5057	1570	895	1105	1397	1475	1922	3390	4129	2921	2622	2654	4322	5298	2013	7440	1229	1810	2260	7893	1864	1559	3371	2175	3025	8865
246	1614	2681	3769	2791	1009	1111	857	2293	1781	1944	3177	3973	2706	3216	1189	5962	4300	3794	14942	1528	1898	1673	4241	5111	2080	908	1085	1417	1471	2115	3511	3919	2697	2455	2675	4032	5542	2038	7166	1065	1777	2401	8520	1859	1420	3288	2140	3188	8994
247	1571	2700	3422	2615	1059	955	799	2165	2249	2082	3313	4039	3130	3274	1343	5897	4276	3929	14779	1628	1890	1801	4159	4830	1701	846	1102	1392	1507	2100	3215	3608	2945	2221	2589	3794	4926	1974	6852	1115	1676	2301	8720	2239	1413	3342	2416	2923	9124
248	1647	2746	4076	2753	1186	1139	810	1826	1932	1823	3399	3895	3503	3152	1076	6022	4174	3837	14766	1246	1808	1837	4146	5099	2004	911	987	1452	1531	2060	3394	3526	3006	2715	2644	4183	5246	1888	7291	1363	1735	2219	8382	1606	1434	3219	1921	2900	8978
249	1650	2539	3469	2679	1364	1057	885	2043	2149	2063	2947	3976	3169	3271	1085	6137	4311	3851	15001	1361	1605	1673	4100	5030	1832	885	1109	1399	1573	2315	3259	3684	2759	2555	2432	4015	4901	1903	7349	1361	1636	2374	8675	2080	1476	3294	1986	2828	9165
250	1703	2646	3442	2673	1145	1159	753	1922	2181	1923	3328	4180	3201	3364	1341	6005	4161	3780	14860	1407	1658	1566	3854	5110	1935	710	1081	1351	1607	1883	3322	3784	2897	2535	2633	3906	5322	2042	7206	1657	1730	2158	8190	1997	1590	3357	2106	3112	8886
251	1696	2658	3490	2677	1280	1092	804	2190	2315	2063	3033	4013	3336	3265	1189	5881	4246	3874	15121	1395	1626	1745	4059	5049	2107	451	971	1321	1735	1992	3360	3523	2851	2389	2566	4004	5323	2063	7049	1154	1728	2587	8219	2219	1536	3480	2165	2651	9009
252	1520	2679	3428	2663	1232	1014	822	1781	2222	1862	3209	4319	3055	3526	1253	5801	4253	3946	15224	1519	1603	1612	4037	5115	1919	796	1020	1277	1705	1982	3160	3654	2984	2145	2478	3928	5668	1950	7030	1089	1790	2327	8550	1971	1376	3344	2223	2748	8845
253	1635	2303	3461	2658	1135	1098	712	2368	2192	2042	3045	3741	2967	2983	1154	6085	4123	4001	15247	1365	1685	1787	3934	5123	1848	853	1154	1301	1489	2020	3482	3547	2987	2487	2439	4053	5431	1922	7085	1210	1812	2450	8934	1804	1458	3360	2160	2916	9470
254	1474	2533	3736	2690	1153	1274	906	1812	2182	2050	3456	3974	2907	3154	1257	6061	4143	3932	15010	1333	1795	1525	3890	5151	1988	768	994	1412	1673	2020	3469	3931	2841	2337	2513	4168	5704	1964	7284	1239	1741	2417	8694	2039	1592	3425	2135	3029	9481
255	1497	2545	3617	2681	1080	1148	707	2222	2291	2005	3239	3677	3286	2976	1186	6039	4163	3809	14553	1272	1804	1624	3787	5052	2073	828	981	1275	1566	2021	3294	3847	3056	2614	2748	3952	5571	1959	7094	1307	1910	2222	8082	2050	1520	3289	1905	3142	9016
256	1518	2318	3222	2641	1318	1227	873	1875	2284	2087	3180	3911	3030	2985	1336	6336	4162	4107	14890	1427	1753	1745	3588	5402	1774	671	1020	1373	1646	2054	3530	3419	2766	2631	2436	4042	5373	1897	6777	1231	1896	2380	8660	2066	1393	3169	1717	3155	9200
257	1692	2380	3474	2769	1105	1262	728	2029	2270	2149	3176	3669	3270	3157	1424	6290	4028	3964	14659	1142	1706	1676	3981	5107	1591	721	1031	1318	1466	2113	3401	3965	2892	2498	2568	3893	5496	2055	7012	1135	1915	2376	8529	1895	1263	3226	2053	3162	9226
258	1659	2396	3659	2513	1163	1119	892	2212	1920	2149	3225	4028	3186	3193	1135	6298	3975	4077	14812	1345	1670	1789	3858	5265	1582	687	955	1283	1730	2171	3410	3885	2713	2520	2442	3775	5410	1778	7329	1143	1720	2139	8593	2049	1474	3107	2071	3234	9178
259	1569	2459	3674	2647	1247	1279	935	2234	1961	2190	3264	3752	3301	3106	1226	6180	4131	3894	14761	1472	1836	1601	3713	5185	1878	808	1210	1332	1563	2182	3553	3806	2842	2439	2640	3970	5342	2016	7550	1095	1911	2162	8235	1898	1511	2976	2113	2874	9025
260	1634	2607	3855	2755	1129	1188	902	2171	2303	2188	3215	4172	3169	3375	1253	6270	3947	3959	14909	1445	1780	1724	3912	5222	2072	779	985	1448	1640	2038	3814	3988	2839	2450	2409	4054	5590	1851	7145	1381	1892	2254	8490	2067	1495	3226	2135	3132	9149
261	1591	2538	3919	2724	1055	1011	700	2309	1945	2060	3165	4019	2764	3401	1213	6229	4077	3978	14751	1455	1790	1799	3699	5122	1655	629	1022	1514	1547	2182	3347	3649	2862	2484	2352	3942	5443	2099	7089	1212	1634	2190	9061	2107	1411	3111	2071	2912	8956
262	1717	2568	3934	2612	1121	1256	758	1996	2218	1979	2997	3975	3081	3096	1115	6233	4095	4024	14703	1409	1580	1750	3853	5103	1966	626	993	1432	1715	2310	3550	4068	2414	2222	2666	3649	5087	2021	7149	1091	1789	2376	8446	2069	1342	3107	2244	2796	9266
263	1932	2180	3568	2535	1126	1248	841	1847	2042	2028	3168	3814	3254	3338	1192	6030	4134	4090	14401	1539	1663	1624	3926	5278	1899	656	1011	1567	1752	1937	3536	4136	2749	2475	2408	3799	5704	2119	7239	1286	1634	2342	9162	2200	1253	3180	1872	3043	9191
264	1647	2528	3533	2820	1097	1166	932	2230	2043	2115	3095	3874	3418	2759	1211	6117	4002	4199	14388	1444	1753	1484	3913	4937	1881	664	1131	1307	1485	2292	3467	4223	2753	2456	2573	3860	4857	2090	7086	1181	1734	2378	8397	2101	1224	3318	2023	2910	9129
265	1734	2355	3827	2810	1276	1210	803	2051	2101	2194	3009	3914	3309	3088	1519	6032	4075	4139	14297	1521	1884	1767	3624	4873	2088	744	1021	1499	1440	2052	3412	3939	2782	2474	2674	4037	4977	2089	7089	1264	1788	2357	8120	2021	1238	3121	2095	2937	9381
266	1675	2471	3628	2619	1069	1100	783	2037	2065	2107	3171	4183	2894	3210	1280	6020	4092	3895	14799	1290	1983	1600	3614	4930	2088	756	1021	1356	1633	1959	3344	3880	2780	2576	2631	4136	4831	1796	7336	1223	1589	2316	8141	2135	1432	3184	2057	3069	8669
267	1626	2450	3829	2590	1021	1249	793	1953	1820	2036	2976	3971	3194	3081	1428	6158	4179	4104	14451	1266	1767	1607	3594	5004	2073	816	1005	1397	1561	1927	3513	3887	3048	2444	2572	3881	4896	1796	7085	1143	1895	1938	8243	1964	1482	2948	2002	2522	9514
268	1818	2460	3728	2471	867	1181	845	2235	2012	2036	3157	4219	2980	3411	1230	6147	3888	4207	14460	1418	1784	1815	3650	4982	1892	826	1101	1417	1541	1979	3298	4206	2685	2231	2559	3713	4903	1908	7122	1094	1593	2154	8085	2219	1310	3194	2017	2903	9060
269	1729	2383	3525	2584	1060	889	954	2158	2046	1978	2983	3999	3151	3193	1146	6265	4158	3944	14574	1288	1711	1851	3547	5002	1999	758	1015	1373	1571	1999	3346	3924	3055	2524	2764	3848	5330	1813	6959	1008	1832	2215	8420	1901	1257	3054	2139	2753	9162
270	1711	2430	3896	2674	1213	1052	815	1888	2076	2028	2818	4022	3196	3327	1329	6011	4179	4272	14394	1304	1684	1665	3578	4548	1990	875	936	1371	1467	1868	3529	4118	2885	2441	2524	3553	4947	1801	7138	1121	1699	2328	8461	2091	1414	3295	1876	2765	8842
271	1563	2474	3496	2663	1209	1138	742	2071	2235	2042	3006	3969	3049	3365	1199	6049	3920	4421	14400	1411	1546	1893	3850	4957	1775	831	1011	1469	1524	1852	3273	4012	2801	2368	2400	3800	5369	1966	7268	1135	1661	2463	8150	2050	1337	3095	2172	2912	9105
272	1694	2510	3497	2638	1086	1118	790	2050	2111	2109	3276	4133	3292	3379	1273	6085	4245	4137	14463	1382	1703	1597	3586	4615	1849	831	1033	1423	1602	2035	3465	4026	2775	2551	2634	3903	4835	1935	7101	1196	1835	2334	8464	2062	1524	3141	1849	2711	9245
273	1714	2464	3694	2456	1142	1045	701	1931	2073	1983	3291	3615	2694	3459	1177	6378	4187	4322	14427	1462	1799	1761	3459	5025	1975	846	1020	1317	1518	2004	3407	4078	2781	2633	2373	3870	5004	1993	7233	1318	1553	2289	8592	1734	1437	3024	1852	2810	9444
274	1702	2369	3656	2580	1199	1043	760	2065	2195	2012	3108	3828	3105	3400	1201	6182	3955	4456	14404	1365	1932	1817	3460	4483	2032	670	1002	1419	1389	2026	3573	3665	2911	2403	2594	3927	5197	1910	7037	1133	1842	2335	8303	2164	1424	3273	1896	2977	9156
275	1785	2589	3389	2728	1028	1110	764	1963	2072	2057	3026	3931	2931	3461	1313	6440	4038	4197	14452	1232	1687	1748	3743	4776	2006	816	1026	1334	1515	1838	3377	4019	2658	2395	2367	3742	4806	1785	7020	1206	2054	2608	8492	2173	1291	3346	1760	2803	9152
276	1804	2470	3381	2551	1122	1053	834	2175	2096	1939	2839	3804	3232	3389	1267	6411	4266	4198	14198	1479	1834	1451	3184	4701	2042	584	1047	1521	1545	2039	3457	3830	2843	2191	2425	3887	4785	1872	7310	1198	1783	2267	8221	2018	1452	3060	2071	2781	8973
277	1829	2374	3500	2410	958	1003	922	1771	2182	2027	2838	3875	3159	3571	1236	6508	4106	4148	14260	1229	1720	1661	3477	4657	1934	786	1100	1594	1437	1945	3590	3950	2993	2408	2417	3847	4682	2029	7142	1163	1796	2301	7877	1921	1375	3097	2020	2851	9120
278	1891	2196	3484	2642	1173	1002	728	2045	2220	1976	2819	3805	3192	3323	1211	6808	3999	4297	14529	1366	1812	1694	3346	4456	2049	724	1103	1462	1440	1995	3425	3916	2876	2579	2558	3976	4753	1744	7185	1234	1719	2407	8247	2121	1337	3182	1908	2812	9210
279	1516	2713	3516	2818	1093	948	957	2179	1997	2128	3083	4041	2826	3431	1243	6490	3980	4451	14413	1362	1934	1741	3504	4464	2073	849	1050	1414	1607	1884	3298	4146	2902	2679	2280	4060	5014	1839	7151	1372	1585	2492	8203	1885	1256	3298	1770	2965	9075
280	1723	2236	3818	2538	1205	1071	737	1914	2114	2047	2727	4051	3003	3255	1154	6746	4069	4307	14260	1205	1826	1784	3551	4454	1597	852	1070	1414	1522	1921	3236	3475	2828	2565	2366	3701	5070	1905	7426	1256	1735	2481	7914	2022	1272	3194	1890	2866	9179
281	1888	2577	4210	2511	1008	985	886	2008	2102	2114	2989	4000	3339	3015	1310	6801	3895	4448	13524	1146	1746	1597	3498	4499	2127	790	1222	1276	1405	2002	3613	3757	2457	2559	2393	4000	4698	1988	7297	1328	1801	2429	8368	2152	1311	3196	1852	2963	9339
282	1725	2283	3671	2680	1148	1057	832	2154	1961	2167	2900	4041	3067	3165	1397	6807	3915	4293	14262	1194	1669	1835	3435	4584	2029	652	1070	1436	1378	2077	3412	3578	2693	2571	2471	3913	4497	1860	7298	1283	1839	2462	8047	1931	1487	3221	1904	2967	9715
283	1628	2279	3862	2546	1128	1174	903	1811	2179	2176	3063	3848	3144	3147	1124	6735	3963	4134	13959	1113	1769	1708	3459	4715	2008	964	1101	1406	1269	1953	3404	3980	2731	2507	2401	3846	5203	1933	7228	1244	1767	2335	8296	1961	1332	3137	1958	3081	9171
284	1744	2614	3714	2686	1291	1047	930	1732	2142	1964	2850	3774	3212	3213	1139	6880	3969	4299	13874	1048	1599	1816	3240	4666	1884	640	1015	1381	1584	1891	3424	3604	2765	2462	2255	3920	5066	1834	7012	1053	1761	2552	8356	1979	1326	3235	1862	2830	9283
285	1663	2524	3796	2452	1232	978	705	2009	2172	2069	2979	4023	2863	3576	1212	7040	4011	4273	14260	1266	1760	1733	3451	4448	2001	855	1068	1422	1424	2005	3333	3755	2962	2136	2530	4089	4651	1887	7465	1065	1596	2635	8064	1906	1316	3314	1978	2767	9187
286	1700	2678	3644	2684	1080	808	914	1973	2107	2084	2984	3861	2654	3371	1366	6841	3880	4094	14350	1442	1671	1812	3235	4557	1849	902	1245	1525	1335	2036	3638	3616	2798	2508	2373	4002	4498	1989	7229	1304	1807	2354	8297	1677	1400	3114	1871	3069	9239
287	1776	2202	3624	2604	1039	1068	787	1843	2216	2132	3017	3893	2935	3570	1593	6646	3810	4069	14054	1424	1810	1940	3320	4406	1963	776	1174	1303	1499	1868	3711	3640	2697	2536	2359	3754	4729	2013	7189	1268	1757	2269	8396	1986	1512	3230	2035	2799	9414
288	1864	2590	3323	2645	1036	1224	812	1847	2390	1959	2995	3623	2885	3178	1298	6644	3916	4095	13947	1286	1839	1776	3338	4374	1900	1019	1096	1553	1347	1922	3370	3892	2853	2537	2400	3906	4622	1984	7021	1173	1782	2493	8241	1963	1259	3111	1928	2853	9379
289	1702	2375	3746	2731	1075	849	803	2257	2075	2165	2800	3817	2871	3062	1529	6898	3986	4066	13868	1234	1730	1560	3259	4184	1969	571	985	1430	1472	2038	3637	3381	2619	2079	2541	3829	4886	2038	7042	1207	1752	2637	7865	2077	1392	2872	1881	2853	9228
290	1747	2458	3856	2715	979	1234	916	2108	2451	2012	2946	3423	3132	2951	1625	6758	3872	3965	13450	1305	1722	1759	3261	4507	1949	702	1079	1423	1390	1976	3564	3727	3052	2547	2361	4001	5013	2122	7081	1209	1674	2224	8216	1946	1375	3024	1984	2955	9411
291	1720	2528	3866	2701	1173	1021	718	2220	1949	1996	2800	3960	2962	3372	1401	6795	4050	4469	13996	1258	1658	1733	3646	4342	1555	687	1126	1385	1274	1865	3490	4009	2870	2150	2420	3816	5155	2004	7186	1225	1790	2431	8521	2099	1449	3244	1908	2461	9165
292	1766	2490	3663	2828	1146	1170	781	2241	1970	2251	3071	4118	3122	3180	1338	6898	4091	4233	13920	1348	1774	1895	3543	4487	1933	801	1233	1399	1431	1932	3390	4050	2697	2568	2345	3939	5088	1849	7035	1332	1709	2500	8244	2085	1420	3184	1884	2789	9339
293	1638	2534	3539	2465	1092	1168	856	1999	2204	1999	2838	4139	3208	3285	994	6954	4002	4389	14126	1270	1807	1700	3460	4399	1578	845	1264	1463	1440	1976	3528	3739	2559	2366	2218	4051	5072	1979	6950	1238	1575	2156	8487	1883	1487	3081	2071	2840	9187
294	1573	2384	3725	2597	912	860	890	1911	2297	2169	2783	3543	2877	3167	1195	7282	4019	4229	14155	1172	1712	1696	3751	4285	1821	886	1077	1280	1353	1817	3509	4001	2729	2231	2402	3863	5091	1904	7203	1395	1904	2450	8359	1921	1310	3209	1963	2755	9253
295	1614	2428	3834	2562	1206	1087	900	2002	2346	2164	2680	3879	2975	3085	1513	7331	3868	4438	13669	1368	1747	1599	3408	4290	1665	657	1082	1437	1344	1859	3672	3773	3049	2535	2166	3895	5245	1817	7146	1279	1938	2388	8272	1873	1490	3135	1953	2980	9346
296	1657	2217	3762	2657	1057	1064	784	2041	2430	2322	2600	3884	2867	3079	1197	7579	4008	4311	13791	1161	1585	1933	3742	4362	2051	809	1074	1569	1296	2018	3581	3915	2752	2398	2307	4057	5249	2001	7098	1254	1853	2317	8115	2026	1318	2987	1826	2912	9203
297	1766	2286	3905	2427	1225	1124	821	2000	2473	2297	2723	3805	2879	2894	1157	7380	3702	4423	13751	1236	1845	1826	3569	4296	1923	679	1067	1526	1343	1962	3684	4040	2791	2643	2118	3748	5236	1937	6951	1186	1718	2284	7956	2093	1340	3110	1938	2762	9507
298	1749	2462	4263	2624	1029	978	815	2318	2373	2130	2823	4033	2982	2905	1284	7551	3844	4149	13714	1250	1842	1654	3542	4083	1958	729	1029	1332	1460	1809	3712	4069	3055	2340	2402	3992	5336	1985	7266	1095	1778	2470	8271	1987	1428	3291	2060	2680	9505
299	1873	2224	4168	2526	1128	1176	753	1968	2601	2148	2813	3598	2622	3247	1144	7237	3900	4287	13930	1276	1901	1845	3673	4453	1890	751	1102	1344	1397	1862	3603	3631	2748	2351	2274	4007	5348	1990	7177	1395	1826	2164	7992	2134	1367	3104	1893	2855	9289
300	1716	2093	4164	2814	1059	1143	928	1933	2125	2118	2812	3866	3172	2962	1225	7486	3940	4333	13599	1204	1859	1580	3761	4216	1939	230	1104	1450	1198	1963	3504	3816	2880	2569	2218	4074	5279	1723	7131	1420	1756	2303	8270	1665	1183	3060	1743	2890	9037
301	1851	2161	4259	2676	1084	950	855	2168	2412	1883	2709	3636	3271	2976	1133	7329	3776	4239	13819	1246	1844	1827	3503	4214	1973	646	1083	1472	1399	1918	3670	3642	2702	2209	2103	4061	5477	1915	6999	1217	1748	2462	8138	1881	1416	3129	1813	2812	9380
[truncated: 123 more columns]

## Sheet: WT ASE to dia
Figures 5C, 5S-1C, 5S-1G
ASE::GCaMP3 F(A.U.)
Stimulus:	0																																											11.5 nM diacetyl
Genotype:	WT																																											WT
N:	1	2	3	4	5	6	7	8	9	10	11	12	13	14	15	16	17	18	19	20	21	22	23	24	25	26	27	28	29	30	31	32	33	34	35	36	37	38	39	40	41	42		1	2	3	4	5	6
Frame (Pulse at 100)
1	2237	3477	1517	2801	1630	2294	2532	2005	2534	2846	2485	1537	2321	1618	1819	6339	1797	1724	1024	999	2309	2146	3784	2044	2730	1839	2517	2080	1996	2224	2921	2256	1704	2124	1447	1661	6572	1647	1705	979	791	2453		1504	2620	3025	2203	1679	1966
2	1968	3587	1672	2980	1640	2878	2051	2178	2758	2658	2454	1646	2069	1709	1981	6544	1775	1991	1135	1074	2542	1973	3455	1787	2751	1691	2285	2284	1784	2345	2642	2318	1571	2541	1590	1745	6291	1747	1768	1009	767	2490		1610	2767	2991	1932	1645	2055
3	1940	3740	1903	2974	1838	2766	2276	2112	2719	2700	2348	1461	2304	1708	1826	6467	1772	1820	1018	907	2604	2035	3801	2152	2763	1854	2405	2206	2000	2550	2884	2550	1601	2330	1631	1832	6458	1934	1740	1038	1000	2428		1517	2637	2890	1760	1842	2074
4	1979	3668	1625	2802	1804	2227	2444	2298	2470	2759	2372	1487	2188	1615	1720	6506	1733	2004	1092	917	2506	1995	3648	1895	2625	1550	2589	2119	1700	2418	2512	2390	1597	2258	1497	1712	6203	1475	1768	1007	970	2410		1578	2538	3046	2082	1838	1971
5	2082	3854	1582	3030	1710	2267	2220	1597	2718	2876	2360	1593	2358	1645	1880	6501	1654	1866	978	763	2584	2019	3638	1798	2613	1670	2216	2024	2046	2512	2853	2397	1685	2471	1606	1840	6440	1760	1644	933	948	2619		1577	2376	2939	1800	1994	1938
6	2185	3561	1685	2763	1671	2018	2284	2056	2397	2837	2401	1502	2182	1622	1787	6478	1680	1732	1078	1011	2243	2073	3666	1968	2830	1592	2387	2488	2189	2481	2624	2291	1720	2443	1660	1566	6470	1845	1576	985	1014	2618		1633	2499	3001	2246	1794	2182
7	2141	3574	1455	3025	1940	2352	2295	1668	2575	2778	2230	1541	2075	1772	1798	6481	1682	1798	971	859	2573	2083	3703	2120	2713	1775	2713	2024	1751	2551	2627	2314	1620	2455	1749	1585	6441	1763	1732	933	810	2550		1589	2521	2959	1805	1734	1907
8	2054	4006	1521	2859	1739	2586	2412	1682	2621	2838	2620	1510	2407	1518	1737	6345	1598	1958	1114	1014	2526	1936	3635	1822	2434	1763	2371	2330	2064	2543	2697	2373	1295	2232	1588	1685	6256	1583	1857	990	984	2603		1535	2534	3118	2059	1824	1821
9	1970	3841	1697	2683	1770	2347	2483	2145	2415	2607	2427	1488	2360	1693	1523	6320	1691	1753	1036	1010	2386	1993	3732	2187	2501	1540	2384	2425	2112	2442	2888	2355	1666	2273	1576	1765	6224	1693	1746	1095	1056	2481		1522	2593	2899	2085	1811	2116
10	2210	3467	1635	2846	1605	2157	2236	2018	2604	2669	2352	1434	2137	1569	1774	6450	1613	1858	959	1024	2713	2070	3681	1885	2583	1745	1974	2270	1940	2398	2698	2400	1503	2277	1708	1595	6614	1800	1819	1030	811	2314		1516	2429	2904	1713	1700	1853
11	2026	3694	1840	3134	1856	2424	2165	2285	2775	3013	2302	1553	2395	1570	1826	6764	1732	1801	942	956	2543	2101	3742	2059	2720	1694	2550	2390	1681	2634	2835	2305	1525	2229	1539	1671	6607	1817	1785	1024	1063	2332		1486	2589	2939	2048	1800	1933
12	2266	3865	1477	2974	1886	2644	2266	2121	2621	2926	2295	1569	2629	1643	1691	6588	1547	1731	1070	1031	2550	2078	3613	1970	2700	1765	2666	2273	2008	2339	2809	2291	1702	2340	1629	1910	6361	1470	1803	1062	926	2647		1471	2612	2744	2066	1787	1833
13	2186	3792	1641	2980	1698	2113	2526	2181	2594	2847	2328	1678	2273	1560	1804	6468	1610	1752	916	999	2563	2201	3585	1820	2888	1999	2502	2029	2032	2496	2994	2359	1524	2449	1630	1809	6680	1711	1651	1180	1093	2346		1486	2635	2788	1916	1754	2168
14	1884	3468	1560	2730	1842	2384	2443	2207	2739	3126	2287	1582	2258	1528	1645	6617	1787	1737	970	987	2452	2073	3481	1926	2809	1854	2481	2271	2067	2474	2841	2266	1425	2342	1646	1902	6301	1844	1564	975	1011	2351		1581	2734	2776	2352	1935	1949
15	2163	3692	1702	2933	1725	2146	1985	2143	2459	2972	2389	1573	2143	1580	1743	6507	1625	1714	1081	1026	2780	2047	3613	2072	2767	1880	2563	2394	2297	2652	2795	2330	1333	2215	1650	1916	6673	1660	1746	988	1126	2416		1569	2589	2756	2126	1887	2182
16	1983	3712	1546	2855	1678	2191	2321	2369	2867	2938	2309	1548	2244	1494	1621	6465	1823	1830	1226	1097	2437	1918	3772	2124	2694	1831	2552	2364	2132	2412	2859	2351	1581	2351	1634	1767	6519	1541	1696	1199	884	2609		1577	2563	2737	1633	1719	1956
17	2242	3755	1552	2824	1770	2690	2139	2198	2687	2827	2514	1581	2318	1519	1681	6530	1536	1777	1052	1030	2698	2090	3386	2016	2871	1612	2473	2385	1945	2351	2702	2359	1680	2336	1611	1756	6564	1660	1811	995	931	2390		1465	2586	2814	2076	1890	2035
18	2131	3754	1645	2811	1921	2483	2300	2220	2425	2871	2353	1651	2464	1468	1642	6309	1879	1717	897	938	2125	2152	3530	1875	2897	1740	2495	2289	2038	2363	2815	2196	1717	2280	1722	1499	6667	1665	1792	1140	1022	2552		1476	2506	2910	1921	1456	2072
19	1943	3804	1455	2732	1823	2473	2257	2152	2751	2792	2380	1551	2423	1627	1707	6231	1742	1476	1196	999	2512	2150	3686	1982	2861	1947	2498	2238	1909	2390	2860	2353	1573	2375	1651	1683	6460	1868	1839	935	843	2275		1369	2724	2689	2125	1799	2089
20	1950	3616	1583	2851	1569	2265	2111	2157	2739	2747	2501	1621	2240	1648	1701	6584	1700	1823	953	1088	2474	1968	3545	1906	2719	1762	2547	2389	2292	2645	2842	2258	1474	2235	1668	1452	6572	1634	1848	1074	937	2785		1432	2668	3041	1832	1801	2020
21	1906	3774	1660	2996	1846	2132	2052	1898	2831	2955	2508	1640	1743	1539	1656	6419	1582	1701	1229	1031	2561	2250	3750	1981	2791	1575	2601	2234	1923	2757	2897	2173	1694	2243	1673	1842	6447	1703	1797	1110	1010	2553		1393	2663	2908	2059	1765	1848
22	2099	3609	1503	3033	1709	2247	2187	1976	2739	2578	2342	1640	2585	1615	1905	6397	1803	1682	1035	1033	2504	2057	3740	1977	2764	1928	2632	2303	2045	2652	2736	2320	1674	2293	1635	1663	6563	1763	1799	936	1113	2663		1552	2493	2929	1625	1791	2092
23	1964	3622	1618	2776	1829	2499	2139	1669	2629	2960	2361	1501	2139	1673	1747	6457	1570	1801	1065	1025	2601	1970	3763	1989	3072	1848	2543	2193	2069	2229	2890	2544	1503	2265	1519	1757	6421	1702	1578	1035	996	2732		1517	2552	3037	1985	1973	1894
24	1963	3876	1691	3031	1738	2272	1834	2049	2581	2847	2292	1694	2574	1766	1453	6445	1595	1782	1089	832	2576	2088	3616	2031	2637	1881	2583	2373	1803	2826	2769	2203	1677	2213	1588	2030	6568	1650	1734	1090	1046	2379		1434	2502	3087	1897	1902	2074
25	2158	3808	1503	2905	1663	2353	2388	2255	2682	2816	2612	1569	2526	1562	1725	6458	1508	1612	1112	853	2445	2141	3521	1865	2392	1685	2666	2322	2073	2209	2952	2301	1581	2215	1604	1942	6285	1894	1779	1111	930	2696		1499	2494	2906	2128	1936	1983
26	2217	3812	1672	2844	1753	2519	2186	2072	2496	2787	2394	1609	2565	1555	1904	6578	1658	1835	944	982	2557	2132	3688	2039	2800	1811	2476	2377	2082	2513	2810	2315	1737	2489	1711	1511	6264	1719	1833	958	958	2691		1674	2546	3196	2067	1987	2309
27	2166	3545	1448	2718	1693	2344	2408	2336	2367	3042	2321	1605	2344	1567	1783	6424	1626	1730	925	1025	2628	2131	3710	2049	2601	2026	2095	2352	1824	2696	3043	2271	1548	2077	1734	1388	6561	1971	1805	999	1085	2662		1384	2726	2947	1775	1788	1801
28	2133	3765	1583	3014	1806	2196	2275	2013	2591	2881	2336	1497	2361	1560	1814	6340	1892	1775	1049	931	2602	1964	3481	2085	2867	1673	2685	2106	2067	2543	2846	2028	1726	2114	1771	1613	6592	1658	1640	1075	1100	2644		1731	2544	3047	2175	1585	1995
29	2097	3673	1796	2923	1586	2207	1961	2066	2502	2853	2266	1603	2488	1647	1739	6252	1726	1870	877	942	2429	2227	3337	2109	2687	1658	2627	2219	2113	2445	3000	2286	1727	2245	1671	1929	6658	1574	1714	991	967	2553		1536	2543	2630	1852	1699	1999
30	1924	3882	1565	2127	1438	2223	2091	2102	2474	2755	2371	1459	2072	1380	1534	6471	1404	1879	1106	888	2334	2090	3531	1824	2765	1782	2439	2362	1683	2860	2991	2418	1526	2198	1553	1770	6400	1727	1846	1120	923	2469		1488	2414	3093	1735	1676	2112
31	2118	3627	1527	3075	1681	2474	2047	2158	2728	3098	2433	1588	2371	1500	1622	6620	1588	1682	1110	873	2685	2127	3662	1848	2593	1717	2741	2195	2106	2561	2833	2294	1557	2366	1728	1815	6313	1633	1825	1250	983	2540		1562	2544	3075	2133	1603	1906
32	2057	3684	1444	3003	1694	2524	2321	2319	2575	2879	2468	1502	2396	1545	1825	6311	1556	1700	1165	958	2328	1946	3822	1979	2860	1519	2519	2342	1937	2645	2904	2423	1525	2351	1745	1849	6659	1751	1818	1179	1100	2636		1453	2589	2567	2011	1924	2145
33	2049	3795	1471	2837	1511	2267	2001	2028	2407	2720	2461	1698	2374	1554	1901	6491	1630	1854	953	907	2395	2244	3659	2151	2809	1755	2488	2337	2288	2698	2817	2156	1682	2084	1659	1624	6462	1670	1713	1156	913	2482		1597	2498	2960	2073	1948	2061
34	2108	3812	1445	2789	1672	2399	2251	2028	2675	2871	2326	1540	2062	1387	1805	6473	1730	1721	1144	907	2339	1980	3564	2116	2661	1732	2547	2363	2207	2461	2599	2252	1388	2175	1669	1704	6337	1585	1827	1092	799	2524		1470	2484	2636	1960	1893	1935
35	2137	3685	1530	2716	1804	2452	2438	2214	2517	2867	2340	1453	2455	1591	1597	6436	1545	1651	1045	863	2523	2112	3709	1953	2675	1494	1984	2392	2157	2726	2930	2311	1637	2291	1799	1810	6863	1707	1882	1143	970	2380		1597	2471	2612	1715	2029	2009
36	2109	3756	1658	2873	1727	2375	2126	2187	2701	2876	2415	1604	2342	1809	1691	6421	1486	1726	920	738	2409	2015	3848	2122	2838	1757	2517	2187	2211	2437	2790	2369	1739	2427	1731	1711	6376	1715	1776	1018	973	2349		1467	2525	3077	2067	1948	1887
37	2064	3740	1455	2002	1692	2457	2369	2091	2526	2894	2293	1512	2242	1467	1885	6464	1525	1807	1106	786	2494	2056	3863	2146	2903	1707	2512	2011	2206	2562	3100	2457	1575	2170	1591	1832	6537	1781	1851	1131	927	2385		1421	2615	3130	2490	2006	2040
38	2029	3888	1383	2899	1687	2477	2262	2168	2743	2858	2361	1648	2061	1597	1663	6647	1525	1869	1272	903	2485	2215	3686	1852	2808	1745	2488	2150	2011	2411	2839	2228	1328	2189	1632	1855	6360	1643	1772	1201	818	2475		1534	2585	3196	1743	1865	2058
39	1903	3730	1734	2927	1682	2295	2259	1546	2556	2768	2428	1739	2283	1627	1606	6299	1586	1796	979	779	2395	2074	3537	2019	2892	1772	2653	2296	1669	2659	2900	2249	1671	2473	1799	1819	6420	1638	1877	900	908	2465		1547	2562	2905	1947	1941	1993
40	2175	3773	1511	2902	1715	2581	2281	2242	2653	2743	2450	1665	2357	1640	1703	6553	1545	1915	1132	955	2444	1968	3588	2052	2733	1608	2459	2220	2179	2623	3049	2360	1588	2224	1654	1700	6459	1522	1634	1041	976	2378		1541	2424	2970	2094	1600	1989
41	2020	3692	1599	2779	1521	2297	2451	2045	2707	2756	2359	1527	2275	1458	1705	6453	1829	1706	999	708	2195	2116	3716	2114	2898	1947	2512	2252	2050	2526	2780	2444	1677	2205	1609	1805	6452	1720	1782	1065	860	2393		1503	2431	3079	1842	1894	1725
42	1990	3853	1498	2843	1708	2180	2246	2162	2564	2682	2226	1589	2238	1717	1715	6465	1651	1872	926	896	2415	2149	3798	2218	2717	1647	2437	2374	2202	2438	2774	2420	1616	2639	1709	1600	6699	1607	1917	1032	991	2508		1543	2514	2965	2077	1666	2111
43	1975	3499	1478	2755	1803	2483	2403	2129	2670	2724	2448	1473	2405	1567	1832	6481	1825	1886	858	932	2612	2072	3624	2040	2628	1616	2483	2129	1859	2496	2777	2352	1474	2533	1664	1520	6608	1728	1642	1017	1015	2499		1513	2671	2743	2044	1890	2017
44	2145	3552	1675	2682	1860	2473	2291	2056	2590	2851	2528	1678	2290	1764	1384	6738	1644	1850	948	868	2436	2037	3666	1933	2818	1893	2705	2242	1988	2649	3118	2300	1439	2419	1790	1734	6580	1721	1910	956	1029	2491		1436	2438	2996	2176	1594	2092
45	1891	3514	1611	2641	1606	2226	2482	2086	2396	2920	2268	1557	2233	1605	1626	6868	1861	1837	995	969	2535	1933	3692	2038	2773	1526	2638	2360	2196	2566	2901	2463	1466	2412	1543	1429	6523	1765	1814	1151	996	2331		1599	2420	3061	1962	1884	1973
46	1910	3663	1414	2784	1819	2346	2422	2084	2741	2832	2501	1679	2288	1574	1634	6600	1968	1765	924	828	2492	2144	3579	1992	3001	1749	2471	2055	2083	2205	2827	2210	1615	2481	1669	1732	6560	1840	2004	1123	991	2539		1470	2516	2893	2132	1683	2129
47	2093	3505	1467	2892	1876	2290	2431	2183	2675	2820	2519	1534	2238	1717	1702	6494	1766	1670	1103	798	2654	1943	3628	2034	2898	1808	2125	1922	2285	2555	2790	2424	1506	2143	1801	1575	6301	1719	1942	1073	932	2612		1481	2649	3135	2354	1909	1997
48	2066	3736	1483	3138	1707	2617	1916	2253	2751	2955	2564	1586	2084	1598	1614	6369	1546	1893	1141	850	2346	1907	3571	2026	2728	1896	2672	2374	2053	2672	2882	2275	1576	2171	1743	1703	6543	1499	1593	1028	755	2725		1638	2252	2774	2158	1766	1719
49	1927	3711	1657	3009	1557	2285	2270	2459	2679	3032	2507	1643	2267	1681	1666	6355	1831	1733	957	799	2504	2054	3579	1940	2848	1620	2303	2322	2084	2791	2789	2445	1617	2043	1832	1907	6571	1680	1767	1121	972	2371		1401	2708	2675	2214	1607	1976
50	2244	3679	1453	3077	1638	2298	2332	2085	2649	2787	2527	1703	2248	1629	1808	6518	1620	1643	1091	992	2392	2132	3772	2078	2885	1775	2684	2337	2046	2623	2780	2198	1544	2393	1800	1873	6250	1780	1721	904	1042	2672		1598	2413	2680	2115	1942	2004
51	2178	3801	1641	2956	1707	2240	2196	2336	2861	2790	2618	1632	2246	1566	1788	6420	1536	1769	943	887	2579	2033	3677	2003	2705	1799	2628	2380	2068	2694	2762	2152	1404	2403	1512	1922	6839	1557	1776	991	887	2442		1447	2645	2626	2061	1704	2122
52	1999	3769	1514	2869	1703	2333	2397	2224	2682	2892	2375	1654	2267	1832	1653	6428	1804	1683	971	1025	2674	2282	3572	2012	2703	1668	2474	2312	2148	2429	2674	2464	1424	2255	1423	1963	6494	1889	1770	1040	1048	2423		1718	2740	2614	2176	1752	1894
53	1883	3707	1340	2936	1554	2323	2023	2089	2433	2759	2444	1498	2215	1549	1564	6113	1777	1796	1015	785	2561	1887	3756	2038	2665	1588	2536	2212	1860	2574	2892	2290	1556	1996	1658	1631	6457	1737	1655	1075	983	2713		1382	2460	2685	1839	1962	1970
54	2054	3771	1470	2771	1686	2346	2049	2234	2560	2718	2482	1554	2201	1503	1838	6292	1625	1712	1047	829	2707	2090	3572	2001	2726	1735	2503	2118	2057	2489	2726	2306	1614	2158	1767	1893	6537	1720	1714	993	898	2552		1530	2498	2538	1851	1760	1992
55	1891	3614	1303	3051	1562	2501	1955	1928	2459	2886	2409	1580	2146	1624	1696	6416	1720	1869	958	977	2312	1984	3755	1991	2865	1668	2577	2420	1949	2388	2755	2422	1671	1971	1781	1822	6677	1807	1826	1039	713	2340		1440	2527	2198	2018	1660	1860
56	2118	3564	1551	2925	1767	2282	2287	2305	2647	2734	2431	1610	2091	1738	1729	6439	1828	1954	1135	940	2683	2169	3718	2051	2646	1768	2475	2423	2126	2633	2881	2336	1519	2571	1666	1599	6550	1797	1850	1115	1020	2707		1541	2756	2599	2345	1960	1813
57	2060	3842	1521	2932	1543	2186	2230	2155	2812	2757	2273	1616	2199	1673	1739	6703	1710	1797	965	781	2572	2293	3458	2203	2738	1893	2426	2288	1982	2535	2767	2348	1475	2285	1578	1771	6590	1632	1757	1011	905	2679		1485	2622	2611	2030	1946	1900
58	2107	3608	1410	2932	1574	2287	2102	2114	2492	2809	2485	1381	2209	1624	1746	6705	1539	1881	1138	859	2411	1952	3586	2096	2726	1626	2710	2148	1987	2509	2832	2243	1367	2118	1712	1875	6717	1728	1818	893	1024	2311		1542	2498	2533	2087	2019	1945
59	1851	3628	1413	2799	1609	2413	2304	1999	2717	2763	2442	1569	2432	1582	1738	6378	1565	1691	947	968	2521	1962	3721	2018	2731	1800	2422	2470	2192	2615	2795	2287	1591	2343	1770	1620	6635	1748	1838	934	899	2339		1566	2644	2513	2025	1985	2104
60	1964	3724	1443	2727	1731	2400	2323	2085	2459	2724	2420	1540	2230	1826	1809	6521	1421	1721	1193	657	2561	1958	3670	2072	2589	1848	2444	2342	1976	2705	2854	2291	1553	2283	1803	1714	6537	1528	1644	1165	997	2435		1482	2477	2526	1837	1955	2168
61	2059	3525	1589	2127	1597	2332	2014	2457	2716	2787	2386	1514	2373	1483	1821	6551	1487	1734	1152	818	2538	2000	3740	2027	3082	1799	2550	2457	2124	2656	2864	2135	1584	2468	1614	1759	6806	1673	1831	966	668	2436		1447	2784	2496	2461	1867	2019
62	2010	3631	1387	3024	1632	2332	2247	1576	2723	2658	2530	1607	2266	1620	1734	6511	1386	1856	964	870	2476	1915	3715	2197	2553	1738	2290	2188	1595	2613	2662	2313	1655	2456	1817	1849	6420	1727	1825	1030	1038	2429		1558	2637	2579	2070	1977	1933
63	2087	3720	1529	2792	1662	2131	2364	2256	2505	2774	2484	1472	2053	1634	1813	6386	1741	1741	1046	973	2595	2129	3734	1883	2607	1561	2437	2193	1884	2580	2843	2238	1583	2110	1701	1964	6694	1769	1779	1077	990	2699		1608	2427	2453	1956	2022	1890
64	1850	3679	1470	2860	1678	2423	1859	2143	2463	2868	2550	1497	2236	1606	1739	6489	1594	1802	1159	751	2578	1889	3718	2124	2709	1906	2232	2217	2006	2412	2900	2429	1556	2354	1760	1986	6343	1809	1566	1014	1030	2628		1641	2637	2870	1902	2011	1938
65	1936	3588	1347	2871	1739	2201	2318	2256	2635	2818	2414	1582	2297	1437	1577	6492	1557	1586	927	1014	2439	2084	3750	2048	2780	1618	2538	2211	2226	2652	2945	2386	1550	2178	1871	1660	6596	1616	1821	1168	1081	2658		1385	2556	2517	1754	1924	1982
66	2137	3648	1420	2816	1612	2908	2425	1971	2469	2609	2598	1666	2252	1640	1386	6274	1595	1678	1202	1130	2532	2191	3761	1906	2740	1795	2651	2514	2041	2740	2953	2333	1561	2283	1670	1852	6346	1403	1869	1087	1023	2495		1540	2382	2580	2147	1853	2028
67	2147	3638	1257	2791	1553	2342	2287	2097	2848	2844	2681	1343	2160	1567	1710	6371	1599	1926	1205	905	2315	2013	3729	1948	2723	1700	2087	2080	2008	2814	2903	2368	1481	2234	1443	1796	6623	1667	1810	1002	998	2564		1473	2429	2510	1968	2123	2046
68	1914	3744	1496	2942	1568	2361	2066	2074	2631	2783	2334	1519	2417	1679	1715	6548	1704	1607	1087	884	2376	2023	3681	1995	2850	1571	2522	1938	2127	2712	2837	2393	1540	2379	1638	1847	6705	1497	1866	1109	1050	2437		1627	2539	2511	2102	1954	2068
69	2122	3650	1479	3134	1670	2371	2237	2154	2680	2944	2438	1518	2250	1694	1937	6430	1636	1817	1043	990	2468	2033	3857	2091	2762	1502	2606	2272	1957	2738	2953	2236	1539	2221	1733	1730	6293	1616	1842	1116	894	2430		1514	2679	2467	1851	2100	1993
70	2052	3567	1310	2948	1617	2356	2128	2020	2767	2906	2488	1406	2316	1597	1717	6750	1790	1940	1022	1019	2391	1945	3989	2165	2624	1759	2317	2370	2192	2714	3037	2510	1572	2270	1675	1688	6603	1686	1928	1218	1068	2818		1341	2707	2374	2091	1821	1964
71	2122	3865	1566	2032	1891	2175	2331	2398	2431	2704	2523	1576	2326	1665	1605	6410	1861	1791	962	813	2464	2144	3655	2003	2797	1900	2599	2296	2006	2516	2833	2180	1494	2356	1662	1728	6446	1752	1798	1116	877	2509		1537	2569	3097	2390	1905	2035
72	2177	3621	1468	3019	1853	2376	2251	2345	2318	3036	2445	1518	2111	1842	1823	6458	1737	1847	1128	1017	2374	1929	3571	2237	2785	1544	2451	2487	2044	2698	2641	2347	1487	2161	1597	1806	6732	1689	1936	1164	1005	2505		1357	2525	3192	2039	1834	2006
73	2168	3555	1300	2783	1717	2233	2408	2297	2728	2625	2374	1592	2257	1580	1807	6256	1718	1544	947	877	2343	1961	3647	1940	2484	1427	2452	2144	1998	2539	2764	2205	1535	2282	1503	1834	6398	1562	1944	1057	968	2470		1399	2267	3185	2326	1760	2061
74	2221	3943	1477	2757	1675	2282	2351	1981	2599	2643	2573	1575	2084	1829	1705	6543	1596	1695	1075	777	2562	2159	3855	2206	2774	1719	2445	1925	2003	2439	2638	2252	1640	2372	1703	1871	6356	1677	2036	1033	1020	2737		1512	2470	3068	1821	1575	1996
75	2012	3640	1523	2873	1673	2211	2195	2347	2597	2717	2503	1502	2231	1744	1832	6487	1712	1781	1090	947	2370	2054	3561	2079	2642	1684	2402	2603	1939	2542	2839	2372	1584	2347	1818	1543	6488	1928	1870	1154	962	2613		1518	2493	3106	2330	1846	2149
76	1789	3525	2088	2553	1731	2364	2275	1767	2470	2781	2421	1494	2158	1658	1960	6349	1610	1685	1072	914	2439	1976	3586	2021	2867	1771	2204	2200	2057	2664	2906	2389	1641	2217	1598	1482	6600	1640	1829	1081	1040	2463		1403	2557	2571	2165	2286	1983
77	1969	3635	2042	2085	1495	2369	2125	2120	2452	2703	2346	1615	2392	1562	1760	6545	1746	1875	1063	801	2492	2241	3567	2205	2666	1552	2361	2362	2297	2638	2973	2331	1696	2361	1380	1672	6401	1655	1729	1059	1013	2776		1437	2594	3182	1963	1694	1729
78	1995	3740	2414	2684	1652	2367	2476	1993	2543	2822	2333	1574	1964	1798	1787	6638	1660	1761	971	823	2328	1931	3835	2059	2770	1766	2587	2004	2068	2756	2728	2577	1555	2172	1667	1728	6377	1620	1815	969	970	2657		1536	2466	3120	2128	1855	1963
79	2077	3721	2115	2159	1709	2412	1971	1655	2385	3018	2485	1503	2098	1742	1731	6620	1677	1827	1116	910	2418	2004	3544	2137	2760	1622	2582	1929	2228	2663	3025	2334	1672	2187	1699	1563	6408	1744	1779	1191	1073	2618		1506	2566	2994	2110	1686	1944
80	2071	3675	2215	3001	1689	2277	2367	2170	2706	2824	2368	1431	2046	1592	1805	6530	1697	1846	934	744	2478	1894	3586	2006	2678	1822	2444	2146	2043	2779	2673	2174	1460	2210	1556	1767	6666	1718	1779	1182	850	2410		1537	2635	3033	1898	1817	2109
81	2171	3355	2328	2993	1915	2419	2233	2335	2457	2687	2366	1673	2312	1801	1467	6545	1673	1840	996	819	2718	2175	3773	2135	2687	1658	2450	2369	2090	2695	2987	2428	1763	2141	1739	1870	6546	1872	1805	1057	1053	2606		1459	2517	2955	2058	1458	1934
82	2154	3694	2221	2831	1880	2128	2169	2315	2707	2931	2484	1615	2211	1498	1647	6554	1780	1935	986	933	2408	2073	3944	2147	2764	1720	2586	2209	2234	2609	2768	2276	1582	2294	1449	1696	6564	1694	1751	1072	1016	2601		1463	2550	2873	1696	1794	1852
83	2077	3678	1844	2722	1654	2432	2163	1909	2426	2908	2477	1519	2174	1682	1777	6461	1663	1596	1020	855	2522	2098	3519	1980	2685	1693	2527	2194	2143	2696	2928	2312	1611	2383	1716	1779	6615	1591	1739	1154	757	2752		1429	2593	3046	1996	1620	1944
84	2012	3730	2101	2829	1819	2135	1924	2166	2641	2760	2373	1418	2038	1767	1526	6745	1603	1989	1067	761	2485	2164	3724	1924	2614	1636	2440	2363	2136	2662	2805	2325	1509	2456	1589	1847	6730	1801	1805	956	1007	2500		1519	2572	2984	2018	1562	1936
85	1957	3959	1943	2575	1864	2311	2103	1973	2553	2818	2425	1595	2346	1588	1709	6605	1621	1944	973	664	2404	1905	3668	2090	2550	1475	2410	2461	2056	2751	3053	2434	1487	2401	1721	1751	6613	1747	1710	1048	1091	2682		1490	2571	2818	1936	1797	1953
86	2179	3513	1823	3071	1641	2396	2351	1887	2602	2916	2442	1553	2209	1639	1884	6648	1887	1845	963	779	2190	2102	3767	1866	2861	1852	2478	2165	1986	2689	2781	2576	1668	2369	1711	1669	6469	1836	1943	1137	872	2382		1546	2417	3159	1893	1894	2009
87	2064	3627	1998	2839	1823	2385	2361	2164	2390	2734	2463	1658	2259	1775	1673	6593	1927	1761	1132	765	2359	2063	3824	2004	2850	1803	2692	2274	1980	2626	3034	2572	1630	2189	1649	1610	6721	1630	1756	1065	834	2713		1489	2703	2436	2410	1750	1979
88	1866	3708	2199	2821	1724	2390	1801	1817	2690	2718	2643	1629	2157	1787	1755	6564	1675	1879	1226	1015	2544	1895	3809	2204	2708	1739	2386	1867	2048	2656	2686	2392	1666	2480	1629	1773	6578	1910	1850	1133	815	2570		1455	2517	2407	1860	1684	1797
89	2077	3682	2148	2057	1589	2207	2357	2231	2432	2844	2419	1739	2225	1648	1535	6751	1939	1751	930	855	2258	1919	3670	2040	2555	1684	2554	2335	1670	2750	2819	2293	1578	2102	1589	1670	6457	1486	1678	1191	956	2471		1550	2556	2138	2027	1754	2011
90	2088	3598	2301	2854	1648	2265	2118	2303	2979	2759	2448	1436	2288	1533	1761	6616	1711	1835	1061	977	2387	2004	3655	2043	2497	1791	2256	2372	2062	2613	2879	2437	1619	2264	1565	2063	6802	1863	1871	970	869	2588		1486	2490	2233	1951	1775	1794
91	2021	3707	2166	3003	1746	2040	2133	2173	2463	2606	2260	1620	2523	1625	1822	6741	1618	1898	1150	972	2345	2164	3558	1996	2493	1719	2350	2352	2041	2744	2965	2485	1727	2251	1590	1945	6523	1615	1760	1101	942	2639		1566	2654	2276	2010	1659	1871
92	1994	3684	2026	2970	1791	2240	2160	2210	2496	2797	2385	1504	2155	1714	1544	6745	1735	1983	1077	734	2150	1967	3697	1960	2699	1604	2414	2312	1872	2655	2812	2319	1662	1904	1629	1873	6253	1795	1760	1060	990	2464		1508	2563	2164	1623	1727	1890
93	2029	3698	2159	2772	1747	2015	2223	2041	2466	2747	2378	1471	2270	1891	1711	6744	1907	1945	1103	904	2433	2140	3883	2123	3020	1642	2473	1986	2230	2576	2587	2353	1565	2324	1724	1673	6443	1706	1769	926	941	2574		1470	2470	3346	2204	1710	1985
94	2106	3815	2355	2838	1602	2263	2340	2253	2603	2601	2365	1389	2070	1631	1897	6502	1634	1834	939	822	2373	1984	3716	2033	2759	1433	2705	2292	1800	2452	2836	2175	1631	2138	1651	1893	6353	1834	1826	1101	941	2631		1289	2488	2260	2133	1750	1839
95	1977	3941	1960	2788	1807	2296	2439	1955	2427	2767	2435	1551	2060	1716	1935	6449	1661	1963	1103	848	2436	2008	3759	2136	2753	1824	2415	1964	2034	2868	2807	2382	1664	2114	1596	1740	6361	1778	1753	1049	924	2486		1353	2498	2318	2106	1680	1914
96	2019	3690	2190	2770	1899	2367	2487	2074	2662	2634	2453	1623	2193	1664	1571	6323	1682	1811	957	677	2430	1940	3622	2075	2563	1530	2763	2198	2111	2496	2944	2322	1566	2100	1513	1820	6493	1709	1919	968	922	2625		1632	2553	2320	1879	1704	1968
97	2195	3845	2015	2757	1827	2535	2219	1980	2457	2767	2315	1630	2153	1505	1768	6733	1649	1781	1041	844	2360	2072	3598	2047	2581	1715	2485	2061	2115	2464	2539	2402	1688	2132	1565	1835	6585	1929	1861	1149	1074	2540		1483	2525	3020	1745	1766	1854
98	2266	3541	2026	2039	1679	2213	2457	2027	2411	2710	2386	1506	1993	1502	1860	6567	1748	1733	993	780	1979	2128	3636	1989	2825	1610	2330	2250	2141	2800	2799	2396	1689	2146	1777	1950	6454	1597	1699	1020	948	2431		1443	2546	3235	2004	2090	2185
99	2002	3641	2021	2831	1571	2299	2082	2385	2595	2620	2402	1553	1981	1774	1674	6509	1514	1801	910	824	2401	2029	3805	2233	2667	1975	2112	1917	2048	2636	2977	2253	1544	2148	1748	1723	6451	1577	1763	1051	873	2473		1625	2552	3305	2441	1671	1995
100	1904	3629	2090	2670	1900	2283	2289	2306	2608	2835	2345	1782	2184	1596	1740	6984	1779	1726	1087	853	2530	1952	3688	2075	2826	1885	2530	1980	2114	2771	2754	2281	1593	2184	1680	1845	6624	1626	1812	855	1038	2389		1511	2490	2975	2426	1792	2030
101	2123	3779	2026	3075	1899	2465	2307	2154	2752	2925	2367	1677	2132	1634	1748	6665	1635	1790	1201	953	2435	2006	3542	1996	2879	1802	2472	2197	1706	2531	2681	2629	1580	2405	1604	1683	6387	1781	1899	1003	803	2878		1397	2666	2182	2448	1623	2076
102	1998	3606	2082	3022	1715	2209	2251	2210	2699	2880	2379	1618	2413	1751	1605	6706	1786	1925	1004	828	2310	1988	3490	2320	2576	1822	2566	2052	2043	2672	2808	2523	1677	2341	1654	1666	6316	1727	1880	908	1112	2663		1616	2588	2922	2469	1703	2064
103	2217	3430	2160	2193	1743	2226	2180	2274	2668	2450	2599	1712	2130	1590	1877	6609	1713	1791	1013	875	2432	2054	3694	2187	2542	1721	2408	2290	2034	2601	2933	2212	1432	2113	1650	1940	6287	1753	1964	1008	864	2576		1438	2456	3189	2131	1727	1905
104	2073	3772	2363	2867	1806	2276	2508	2140	2612	2805	2335	1542	2525	1774	1927	6360	1771	2100	1216	761	2582	1982	3631	2024	2581	1677	2571	2238	2151	2710	2984	2325	1641	2207	1691	1694	6223	1831	1999	1019	1017	2415		1511	2597	3204	1846	2021	2101
105	1898	3484	1877	2757	1691	2163	2146	2268	2733	2809	2508	1515	2287	1770	1841	6403	1520	2024	1034	775	2365	2192	3665	2177	2860	1608	2492	2253	2164	2610	2776	2434	1672	2350	1576	1597	6678	1692	1735	1082	966	2690		1353	2417	3324	2118	1818	1861
106	2226	3936	2212	2620	1750	2425	2177	2032	2632	2567	2463	1646	1930	1728	1687	6468	1788	1904	1038	853	2565	2159	3769	2032	2887	1909	2740	1923	2163	2626	2856	2389	1681	2023	1922	1772	6489	1649	1940	1294	1012	2565		1478	2465	2954	2203	1854	2060
107	2157	3628	2089	2976	1644	2112	2247	2115	2558	2805	2445	1509	2207	1624	1635	6629	1810	1825	1062	815	2390	2075	3595	2068	2471	1815	2598	2311	2040	2541	2838	2428	1565	2402	1745	1988	6606	1862	1779	1006	999	2569		1458	2472	3108	2194	1647	1990
108	1979	3800	2165	2771	1618	2351	1988	2186	2699	2752	2346	1523	2179	1643	1711	6433	1659	1943	1040	859	2573	1961	3800	2110	2639	1856	2498	2304	1783	2592	2785	2250	1529	2119	1602	1731	6370	1825	1762	967	1052	2487		1400	2564	2639	1832	1852	2123
109	2044	3588	2210	2802	1759	2343	2198	2063	2701	2727	2414	1564	2150	1826	1630	6428	1724	1766	911	906	2590	2061	3771	2104	2764	1740	2456	2220	2142	2475	2754	2407	1646	2388	1496	1541	6571	1661	1792	1212	1004	2446		1370	2602	3032	2056	1731	2200
110	2084	3535	2059	2833	1642	2385	2304	2115	2706	2852	2513	1638	2261	1604	1764	6562	1509	1774	1050	603	2290	1888	3892	2086	2753	1536	2558	1959	2077	2661	2794	2187	1448	2273	1551	1800	6540	1448	1660	1108	1125	2568		1501	2479	3059	1872	1765	2137
111	2035	3700	1957	2808	1832	2249	2357	2144	2403	2756	2457	1517	2311	1793	1499	6389	1646	1980	947	843	2448	2054	3645	2100	2548	1749	2546	2174	2092	2647	2793	2393	1636	2208	1742	1835	6568	1640	1971	1100	878	2295		1633	2485	3092	2080	1637	2098
112	1857	3447	2087	2597	1896	2315	2163	2131	2898	2778	2490	1524	2537	1593	1936	6461	1779	1938	974	835	2350	2066	3689	2165	2779	1785	2456	1860	1617	2432	2871	2214	1724	2123	1435	1778	6336	1639	1764	1126	1112	2523		1458	2620	3178	2282	1597	2015
113	1954	3773	2007	2828	1681	2338	2369	2115	2622	2673	2417	1747	2525	1670	1671	6812	1753	1830	1177	733	2325	2037	3536	2192	2614	1805	2559	2257	2098	2530	2694	2491	1460	2203	1434	1702	6509	1760	1921	1137	1172	2604		1512	2546	3192	1590	1716	2191
114	2107	3558	2159	2696	1745	2307	2262	1993	2359	2609	2539	1462	2200	1635	1679	6655	1731	2024	1108	757	2425	1969	3734	2144	2552	1776	2270	2318	2158	2411	2953	2396	1491	2258	1756	1904	6658	1701	1797	1140	1082	2365		1461	2672	2966	1572	1841	2104
115	2031	3610	2128	2821	1595	2577	2105	1963	2346	2615	2513	1528	2263	1753	1656	6249	1640	1840	945	782	2661	2119	3466	2063	2631	1800	2543	2272	2010	2455	2781	2328	1518	2322	1578	1967	6468	1571	1675	1054	971	2778		1408	2552	2643	1884	1689	2146
116	2217	3635	1883	2795	1689	2160	2097	2123	2317	2823	2379	1599	2412	1663	1743	6580	1550	1854	1057	963	2480	2010	3619	1978	2585	1838	2345	2383	2091	2426	2993	2279	1595	2174	1781	1810	6503	1487	1679	1063	981	2516		1506	2657	2931	2146	1837	2109
117	1965	3691	2113	2687	1873	2229	2235	2074	2443	2679	2497	1459	2343	1623	1807	6625	1812	1817	1050	800	2470	2227	3698	2124	2819	1660	2412	2066	2170	2501	2650	2281	1900	2145	1444	1615	6221	1581	1729	959	880	2566		1518	2534	3147	2164	1788	2080
118	1935	3712	1989	2852	1855	2286	2359	2151	2267	2677	2549	1686	2196	1831	1823	6751	1386	1959	1034	848	2442	2070	3725	1919	2748	1547	2148	2108	2092	2722	2876	2055	1504	2279	1616	1924	6241	1700	1720	1055	912	2380		1496	2574	3083	2067	1697	2041
119	2161	3600	2172	2877	2040	2324	2216	2133	2428	2976	2471	1532	2090	1534	1601	6411	1617	2126	1152	553	2442	2128	3609	1894	2547	1621	2521	2096	1979	2626	2768	2294	1486	2161	1668	1887	6529	1782	1562	1123	1154	2673		1537	2367	3011	1808	1653	2069
120	2091	3757	2256	2751	1834	2513	2114	2259	2294	2843	2355	1582	2467	1741	1843	6593	1808	1935	1073	1051	2488	1954	3490	1996	2614	1676	2235	2370	2100	2550	2811	2326	1636	2178	1561	1854	6344	1708	1695	1004	1015	2612		1576	2495	2946	1999	1967	2050
121	2082	3716	2202	2878	1808	2754	2352	2213	2386	2720	2462	1556	2622	1787	1724	6461	1701	1901	1113	834	2591	2009	3818	1878	2712	1715	2524	1974	2032	2583	2770	2198	1698	2177	1587	1574	6396	1738	1705	1226	1028	2644		1509	2543	3216	1983	1917	2488
122	2205	3754	1994	2756	1746	2299	2343	2241	2662	2702	2313	1701	2303	1540	1750	6381	1744	1910	907	753	2434	2150	3748	1944	2674	1655	2567	2096	2065	2576	2964	2192	1554	2077	1335	1702	6531	1488	1753	940	1029	2570		1575	2598	2370	2260	1811	2215
123	1872	3601	2150	2786	1814	2355	2511	2213	2580	2685	2529	1539	2235	1560	1738	6668	1733	1924	759	845	2464	1922	3548	2080	2580	1720	2609	2163	1978	2648	2967	2230	1587	2174	1492	1702	6628	1378	1687	1114	1009	2624		1454	2372	2759	2057	1894	2162
124	2165	3649	2096	2807	2020	2241	2293	2049	2429	2882	2375	1655	2228	1674	1812	6798	1698	1813	1009	794	2611	2058	3517	2139	2670	1767	2489	2102	2021	2681	2733	2165	1393	2193	1577	1664	6418	1712	1844	942	1042	2692		1596	2281	2344	2290	1853	2019
125	2106	3642	1986	2745	1831	2174	2083	2184	2361	2553	2525	1635	2228	1533	1452	6398	1798	1869	922	795	2427	2001	3515	2110	2466	1722	2618	2078	2151	2647	2768	2349	1773	2076	1666	1859	6491	1637	1778	1005	1040	2850		1573	2601	3066	2301	1711	1981
126	2077	3735	2141	2979	1932	2436	2393	2173	2370	2757	2334	1538	2243	1779	1780	6485	1700	1829	1030	807	2758	2178	3765	1999	2728	1921	2714	2208	2094	2660	2598	2520	1647	2288	1672	1759	6220	1852	1818	1045	1069	2760		1539	2475	2510	2257	1825	2126
127	1996	3754	2112	2822	1686	2266	2265	2193	2451	2853	2553	1438	2194	1723	1806	6361	1859	1877	1068	769	2636	2278	3543	2087	2681	1821	2029	2404	2134	2701	2909	2395	1610	2040	1506	1767	6515	1853	1685	943	1111	2470		1502	2480	2599	1974	1777	2159
128	1834	3811	1955	2764	1736	2294	2321	2062	2312	2776	2493	1715	2161	1595	1746	6542	1696	1859	1064	875	2462	1979	3758	2082	2827	1628	2390	2162	1960	2597	2568	2360	1828	2251	1607	1805	6599	1740	1856	996	1106	2827		1572	2465	2514	1964	1613	2240
129	2164	3574	2133	3164	1605	2292	2373	1698	2389	2985	2568	1509	2604	1770	1673	6564	1545	1623	886	875	2499	2068	3693	2106	2720	1821	2458	2362	1752	2653	2594	2302	1699	2019	1580	1653	6397	1675	1728	1069	1009	2455		1474	2434	2380	2265	1886	2119
130	2007	3659	2046	2930	1756	2143	1996	2135	2574	2646	2341	1719	2159	1667	1745	6686	1935	1922	978	818	2618	1869	3869	2147	2603	1672	2458	2099	2104	2653	2823	2336	1580	2100	1567	1760	6582	1891	1715	1037	1290	2731		1581	2405	2586	1803	1861	2029
131	2042	3610	2092	2595	1988	2254	2061	1998	2474	2909	2587	1828	2321	1726	1589	6624	1661	1811	1050	886	2481	1951	3656	2016	2572	1789	2394	2368	2111	2633	2855	2397	1659	1867	1709	1377	6811	1789	1748	1059	1213	2765		1582	2432	2382	2209	1867	2041
132	2017	3756	2202	2819	1979	2213	2485	1946	2306	2765	2391	1560	2584	1709	1724	6428	1938	1721	922	915	2451	1922	3732	1940	2631	1403	2489	2052	2157	2613	2867	2458	1656	2262	1609	1917	6412	1447	1770	954	1074	2808		1459	2124	3129	1778	1814	2180
133	2020	3736	2108	2711	1920	2508	2033	2128	2748	2766	2475	1561	2230	1613	1498	6424	1806	1850	1062	780	2391	2059	3637	2016	2622	1801	2423	2035	2127	2600	2807	2305	1695	2246	1512	1744	6568	1696	1800	1197	1055	2677		1573	2548	2483	1929	1825	2327
134	2005	3498	2324	2770	1767	2260	1896	2217	2703	2786	2576	1560	2151	1743	1750	6647	1597	1880	1021	683	2128	2220	3545	2050	2703	1641	2402	2118	2132	2389	2853	2238	1841	2263	1534	1847	6561	1719	1753	994	1134	2656		1614	2417	2730	2334	1896	2236
135	2019	3784	2052	2660	1286	2285	2363	2076	2471	2830	2296	1675	2172	1735	1695	6400	1670	1722	881	851	2084	1983	3647	1917	2643	1718	2523	2031	2208	2649	2792	2077	1579	2020	1757	1715	6604	1706	1863	1147	1107	2839		1393	2492	2914	2106	1819	2162
136	1756	3636	2159	2846	1920	2306	2388	1922	2504	2584	2377	1670	2271	1737	1654	6634	1637	1919	888	859	2629	2095	3731	2077	2538	1780	2462	2333	2123	2494	2844	2276	1695	2255	1495	1770	6303	1842	1721	1185	1091	2586		1352	2695	3139	2135	1873	2204
137	2218	3566	2119	2751	2020	2288	2107	1943	2331	2522	2373	1690	2146	1661	1421	6433	1863	2043	998	755	2617	2050	3736	1879	2670	1651	2485	2333	1575	2671	2682	2289	1566	2208	1643	1727	6255	1540	1842	1030	1068	2658		1341	2372	2385	2090	2044	2196
138	2034	3629	1959	2900	1861	2256	2357	1982	2425	2810	2399	1524	2203	1721	1685	6350	1699	1700	955	886	2424	2213	3645	1935	2531	1693	2442	2035	2162	2581	2754	2419	1782	2272	1600	1831	6386	1899	1855	1216	1071	2797		1567	2506	2550	2090	1763	2116
139	2030	3393	2119	2735	1879	2271	2372	1995	2354	2944	2384	1699	2372	1669	1658	6243	1709	1753	963	889	2296	2098	3709	1993	2489	1660	2584	2284	2051	2765	2796	2444	1731	2430	1645	1827	6235	1837	1838	1114	1053	2578		1544	2480	2986	2183	1896	1936
140	1762	3449	2124	2811	1886	2373	2443	2229	2353	2615	2310	1555	2124	1831	1646	6367	1540	1773	961	844	2405	1951	3426	2131	2763	1749	2514	2172	2060	2649	2834	2317	1628	2135	1642	1755	6238	1521	1848	1044	1063	2457		1501	2436	3169	2187	1997	2130
141	1965	3561	2164	2805	1752	2395	2209	2223	2310	2987	2368	1611	2149	1759	1796	6554	1809	1820	882	1029	2594	1987	3647	2034	2499	1797	2556	2092	1589	2585	2871	2290	1505	1889	1656	1811	6435	1706	1756	908	1160	2641		1577	2492	2472	1800	1791	2213
142	1871	3424	2009	2921	1643	2449	2225	2337	2444	2555	2337	1507	2021	1687	1671	6384	1640	1840	1024	852	2190	2061	3617	2133	2719	1726	2519	2337	2102	2571	2725	2144	1481	2226	1537	1838	6681	1649	1900	1121	1027	2737		1550	2519	2637	1765	2052	2148
143	2077	3703	2133	2808	1611	2154	2227	2163	2558	2843	2262	1515	2201	1808	1763	6705	1701	1929	864	1019	2564	2131	3741	1902	2476	1769	2317	2388	2145	2761	2834	2284	1720	1931	1705	1665	6319	1664	1741	959	977	2636		1653	2571	2560	2194	1777	2129
144	2086	3573	1909	2646	1840	2389	2271	2117	2393	2821	2401	1589	2266	1571	1766	6397	1906	1976	955	722	2408	2039	3724	2228	2471	1697	2594	2397	2089	2602	2872	2252	1712	2011	1449	1763	6553	1571	1843	957	999	2682		1359	2529	2636	2314	1989	2132
145	2013	3652	2145	2876	1890	2636	2231	2088	2375	2758	2536	1469	2197	1601	1735	6599	1748	1582	822	944	2375	2022	3600	2189	2491	1640	2513	2158	2190	2674	2909	2315	1750	2181	1639	1774	6437	1864	1840	915	975	2517		1479	2479	2416	2093	1971	2018
146	2070	3610	2120	2719	1768	2218	2306	2122	2312	2483	2486	1632	2136	1723	1956	6510	1629	1827	1124	1058	2406	1950	3821	1935	2740	1856	2301	2117	2266	2527	2712	2216	1751	2364	1781	2031	6421	1825	1898	957	969	2472		1420	2511	2890	2027	1994	2161
147	2004	3712	1969	2834	1678	2454	2372	2151	2464	2617	2374	1527	2307	1708	1701	6332	1628	2000	818	1157	2434	2192	3756	2170	2081	1610	2518	2491	2073	2637	2979	2233	1509	2224	1639	1704	6352	1905	1651	904	907	2512		1454	2542	3081	2018	1840	2207
148	1879	3527	1964	2733	1681	2439	2202	2115	2451	2881	2463	1530	2205	1642	1831	6744	1638	1994	808	924	2379	2184	3552	2063	2574	1724	1865	2234	2102	2569	2749	2300	1656	2257	1659	1815	6628	1679	1725	763	921	2523		1424	2439	2431	1846	1837	2264
149	1773	3638	2086	2775	1636	2260	2205	2291	2580	2598	2411	1735	2093	1499	1566	6648	1620	1647	916	1089	2353	2037	3720	2246	2753	1708	2536	2122	2054	2642	2572	2230	1646	2177	1787	1669	6623	1590	1575	831	1215	2643		1560	2501	2684	2031	1766	1986
150	2209	3703	2027	2729	1691	2215	1978	1913	2489	3055	2557	1643	2079	1569	1831	6670	1788	1909	915	971	2500	1960	3559	2117	2615	1809	2627	2370	1983	2640	2737	2217	1738	1952	1778	1715	6581	1803	1861	1024	1011	2682		1629	2509	2361	1999	1788	2198
151	2188	3438	1891	2635	1863	2637	2303	2089	2406	2675	2378	1675	2591	1794	1810	6525	1654	1774	908	783	2399	2063	3619	2260	2465	1684	2626	2235	2045	2607	2684	2231	1691	2260	1646	1631	6422	1794	1669	950	946	2524		1475	2536	2493	2178	1823	2096
152	1978	3759	2019	2696	1783	2281	2074	2248	2406	3103	2419	1478	2118	1759	1748	6467	1676	1650	861	1009	2457	2002	3695	2103	2524	1509	2435	2156	2066	2723	2908	2422	1595	2372	1726	1841	6501	1788	1554	955	817	2706		1431	2711	2595	1836	2040	2007
153	2066	3491	1958	2747	1861	2360	2385	2191	2589	3128	2507	1534	2062	1714	1793	6736	1766	1887	1010	867	2102	2116	3729	1976	2673	1909	2599	2130	2008	2598	2785	2371	1643	2093	1657	1808	6299	1905	1666	894	850	2578		1612	2552	2408	2171	2031	2238
154	2073	3716	2213	2728	1718	2775	2287	2092	2671	2925	2511	1540	2429	1779	1710	6600	1772	1800	898	1088	2250	1893	3296	2066	2512	1669	2504	2104	1980	2505	2762	2270	1678	2027	1496	1539	6090	1512	1828	1050	816	2666		1599	2573	2394	1878	1864	2039
155	2132	3662	1921	2713	1876	2273	2164	2278	2574	2852	2376	1625	1977	1638	1774	6660	1813	1844	1010	760	2470	2125	3652	2018	2146	1776	2374	2190	1867	2689	2759	2392	1368	2355	1368	1741	6455	1519	1771	980	811	2521		1491	2371	2515	1988	1787	2054
156	1954	3698	2054	2640	1845	2317	2378	2024	2271	2878	2348	1615	2141	1706	1862	6485	1589	1798	898	803	2632	2135	3454	2045	2584	1593	2464	2353	2126	2455	2664	2269	1600	2198	1626	1613	6595	1674	1811	960	834	2627		1391	2538	2609	1952	1858	1966
157	1994	3501	2084	2734	1640	1995	2194	1613	2556	2833	2502	1513	1947	1654	1642	6273	1893	1593	879	950	2637	2024	3658	2181	2635	1566	2573	2469	2270	2697	2733	2311	1606	2381	1562	1631	6673	1797	1762	897	829	2668		1659	2526	2508	2039	2046	2227
158	1925	3446	2100	2744	1899	2707	2197	2022	2781	2798	2350	1466	2041	1626	1770	6505	1654	1501	855	768	2336	2180	3580	2185	2130	1770	2638	2235	2114	2633	2869	2251	1678	2207	1643	1863	6436	1857	1732	1120	781	2445		1358	2439	3095	2067	2078	2201
159	2160	3589	1912	2641	1648	2331	2271	2051	2430	2983	2396	1544	2306	1584	1569	6732	1674	1858	889	694	2413	2055	3484	2014	2759	1622	2732	2055	2144	2470	2887	2393	1581	2210	1530	1665	6309	1725	1930	1014	895	2526		1294	2392	2607	2048	1783	1941
160	2079	3725	1956	2654	1922	2375	2035	1805	2587	3135	2477	1816	2271	1644	1717	6478	1715	1861	912	819	2344	1876	3638	1881	2754	1706	2265	1991	2063	2588	2626	2375	1806	2294	1615	1811	6469	1722	1808	1097	868	2365		1490	2500	3140	1933	1953	2128
161	2227	3651	2100	2862	1813	2382	2248	2102	2572	2894	2562	1633	2279	1668	1580	6508	1730	1922	972	846	2418	1976	3769	2205	2691	1715	2295	1957	2215	2257	2846	2366	1603	2192	1854	1583	6326	1846	1774	936	597	2519		1497	2551	3229	2246	1995	2295
162	2092	3463	2107	2890	1818	2299	1719	2168	2508	2895	2446	1533	2480	1498	1425	6466	1952	1841	960	972	2413	2002	3356	2161	2698	1757	2538	2226	2254	2518	2723	2310	1725	2288	1558	1594	6279	1803	1774	929	723	2555		1436	2392	3136	2085	1900	2160
163	2052	3785	1935	2793	1603	2359	2432	2148	2378	2776	2392	1709	2243	1449	1708	6311	1832	1833	1060	626	2441	1942	3659	1990	2927	1786	2403	2323	2238	2386	2573	2272	1557	2154	1603	1911	6555	1706	1733	1002	763	2646		1474	2392	3257	2304	1960	2271
164	2215	3783	1983	2776	1710	2249	2148	1559	2527	2816	2249	1674	2378	1716	1838	6647	1495	1769	901	945	2372	2091	3605	2179	2025	1620	2385	1869	2173	2617	2848	2359	1624	2439	1638	1555	6563	1754	1751	895	955	2691		1403	2510	2533	2248	2003	1882
165	1975	3641	2355	2794	1686	2467	2194	2144	2666	2751	2437	1442	2278	1745	1663	6230	1707	1886	868	1002	2272	1962	3793	2034	2282	1841	2660	1908	2071	2520	2806	2347	1699	2049	1647	1929	6495	1662	1659	947	777	2464		1561	2536	3284	2139	1740	2060
166	2057	3676	2176	2783	1784	2125	2394	2078	2461	2943	2590	1532	2517	1553	1545	6456	1927	1974	1043	805	2107	2035	3638	1904	2168	1717	2401	2376	1944	2664	2939	2467	1615	2209	1697	1765	6539	1775	1697	1073	986	2590		1574	2483	2280	2022	1855	2056
167	2162	3537	2139	2817	1761	2362	2274	2253	2415	2751	2356	1500	2107	1756	1614	6705	1444	1855	1138	1054	2419	2088	3481	2187	2882	1690	2466	2105	2115	2592	2842	2378	1537	2214	1507	1842	6437	1722	1684	1117	861	2595		1472	2379	2532	2051	1962	2248
168	1977	3516	1956	2784	1588	2399	2106	2460	2463	2854	2171	1413	2235	1821	1852	6226	1687	1833	1082	993	2360	1971	3692	2156	2500	1584	2797	2130	2202	2431	2717	2335	1888	2196	1625	1832	6631	1720	1759	978	855	2426		1250	2559	2333	2134	1823	2095
169	2050	3747	2038	2620	1947	2495	2199	2023	2522	3084	2481	1695	2329	1750	1693	6626	1435	1676	936	853	2345	1703	3531	2123	2256	1535	2627	2414	2195	2653	2967	2284	1553	2144	1636	1752	6442	1851	1756	817	949	2447		1513	2473	3287	2042	1743	2067
170	2145	3654	2033	2879	1583	2316	2110	2293	2319	2557	2332	1464	2347	1629	1842	6732	1908	1679	972	791	2447	1986	3609	2025	2551	1726	2667	2301	1674	2690	2736	2363	1522	2174	1613	1745	6142	1584	1714	948	882	2562		1552	2239	2618	1924	1777	2039
171	1957	3752	2012	2892	1709	2433	2045	2145	2315	2956	2220	1609	2087	1632	1543	6323	1743	1912	921	947	2456	1903	3820	2021	2655	1713	2431	2268	2082	2677	2845	2166	1620	2057	1626	1884	6560	1821	1818	1083	844	2579		1514	2597	2486	2066	2105	2021
172	2067	3843	2200	2877	1933	2279	2122	1979	2424	2946	2432	1476	1975	1769	1567	6723	1776	1895	1109	921	2373	1930	3696	2074	2092	1638	2451	2197	2064	2493	2804	2347	1652	2045	1591	1938	6457	1754	1797	990	841	2554		1449	2636	2518	2149	1719	2190
173	2020	3850	2015	2753	1778	2227	1937	1637	2484	3038	2321	1486	2246	1881	1733	6582	1852	1766	1168	950	2312	2032	3666	2019	2641	1935	2524	2094	2137	2388	2803	2316	1705	2158	1889	1560	6508	1663	1722	1169	904	2553		1475	2242	2658	1865	2071	2104
174	2053	3448	1923	2936	1838	2407	1988	2339	2353	2629	2373	1664	2147	1852	1521	6508	1570	1589	1053	888	2261	1838	3579	2026	2225	1503	2533	2297	2112	2795	2801	2223	1542	2189	1621	1604	6340	1712	1895	1071	960	2502		1664	2549	2681	1823	1909	1951
175	2136	3528	1833	2841	1881	2426	2240	2129	2740	2762	2483	1525	2417	1825	1723	6575	1824	1993	922	1014	2069	1976	3614	2141	2611	1408	1953	1712	2012	2579	2845	2304	1529	2115	1641	1598	6297	1892	1603	829	852	2648		1643	2483	2401	1911	1957	2109
176	2038	3642	2081	2343	1907	2313	2326	1981	2616	2868	2293	1662	2013	1697	1580	6396	1825	1885	1105	996	2131	2087	3662	2032	2490	1534	2810	2330	2132	2643	2870	2513	1603	2304	1543	1889	6453	1633	1839	984	746	2739		1622	2481	2441	1852	1978	2104
177	2003	3588	1889	2763	1866	2300	2407	2068	2481	2747	2492	1471	2250	1569	1706	6502	1639	1859	1087	1042	2442	2097	3700	1999	2539	1772	2340	2363	2285	2530	2658	2271	1715	2004	1670	1666	6329	1834	1744	1045	755	2467		1379	2543	2378	1745	1954	2128
178	2133	3777	1914	2850	1877	2227	2427	2149	2601	2739	2415	1542	2185	1884	1729	6267	1839	1918	1132	656	2416	1916	3367	2075	2625	1626	2636	2152	2163	2695	2611	2411	1661	2185	1600	1913	6633	1732	1713	1001	950	2511		1482	2216	3119	2509	1867	2166
179	1916	3834	2202	2779	1979	2445	2276	1988	2673	2726	2248	1513	2394	1814	1801	6486	1738	1814	1175	736	2487	2091	3766	2185	2530	1690	2569	2266	1776	2450	2808	2319	1656	1885	1602	1756	6564	1617	1645	1061	789	2342		1508	2426	2590	2029	2086	2229
180	1875	3928	1885	2621	1792	2249	2350	2150	2715	2932	2308	1568	2577	1803	1937	6478	1581	1907	1264	972	2226	1986	3802	1843	2135	1761	2666	2385	2091	2657	3065	2447	1611	2206	1675	1734	6352	1800	1709	1064	1001	2696		1679	2486	2533	1918	1836	2079
181	2113	3655	2046	2816	2047	2382	2192	2177	2388	2928	2374	1468	2282	1712	1718	6347	1615	1844	1135	1077	2448	1878	3408	2149	2614	1878	2414	2337	2059	2773	2712	2284	1786	2172	1592	1783	6493	1649	1595	1092	944	2494		1568	2407	2368	2169	2060	2138
182	1987	3604	1774	2644	1957	2464	2307	2162	2405	2796	2453	1717	2083	1801	1628	6659	1576	1802	1079	853	2298	1862	3605	2304	2100	1811	2039	2197	2345	2280	2754	2278	1674	1846	1695	1795	6451	1593	1795	799	928	2866		1358	2535	2520	1941	2030	2108
183	2040	3639	2018	2624	1578	2367	2493	1998	2495	2549	2520	1670	2323	1619	1467	6567	1789	1735	1068	843	2333	1881	3724	2084	2650	1669	2477	2326	2103	2528	2936	2280	1658	2005	1606	1836	6606	1398	1645	1009	986	2507		1279	2359	3117	1515	1709	2121
184	2005	3540	1956	2755	1980	2426	2341	2331	2645	2917	2329	1668	2416	1598	1754	6574	1757	1674	1221	839	2519	2195	3614	2201	2597	1771	2509	2058	2004	2494	2704	2434	1692	2117	1581	1621	6598	1749	1611	1035	895	2668		1447	2539	2378	1971	1918	2197
185	1900	3735	2039	2842	1857	2292	2163	2211	2437	2839	2563	1535	2417	1788	1644	6525	1765	1833	1101	1146	2353	2056	3793	2146	2646	1627	2616	2138	2257	2700	2705	2130	1643	2045	1551	1690	6462	1743	1828	957	906	2518		1544	2689	3159	2062	1911	2013
186	1942	3466	1851	2665	1760	2203	2347	2244	2546	2813	2615	1621	2132	1874	1287	6701	1792	1921	1027	1259	2438	1892	3790	2124	2172	1650	2371	2227	2254	2448	2655	2401	1765	2320	1557	1713	6243	1768	1569	838	1013	2814		1387	2437	3120	2190	1801	2145
187	2072	3801	1762	2693	1891	2188	2110	2219	2506	2888	2233	1507	2439	1782	1769	6523	1642	1620	1049	857	2345	1950	3458	2183	2417	1595	2358	2379	2248	2708	2771	2306	1610	2382	1831	1971	6581	1716	1716	1134	852	2580		1486	2498	3192	2171	1953	2124
188	2167	3759	1919	2841	1875	2282	2101	1882	2564	2988	2402	1738	2698	1931	1729	6456	1705	1726	1019	1016	2416	2029	3756	2058	2726	1454	2327	2287	2215	2642	2931	2385	1601	2035	1650	1635	6539	1754	1839	1017	974	2703		1309	2608	2881	1747	1858	1926
189	2064	3686	1997	2730	1925	2267	2135	2037	2546	2893	2334	1755	2513	1741	1799	6792	1797	1719	901	985	2339	2082	3518	2310	2565	1818	2499	2283	2148	2512	2787	2276	1408	2204	1683	1804	6639	1746	1830	993	861	2410		1538	2720	3327	2267	2057	2050
190	2021	3525	2012	2604	1920	2713	2106	2230	2509	2944	2343	1671	2456	1941	1516	6441	1708	1907	935	890	2414	2052	3529	2144	2647	1540	2389	2043	2068	2644	2736	2424	1779	2010	1619	1733	6283	1722	1729	1106	928	2635		1391	2671	3122	1935	1918	2040
191	2170	3797	1901	2647	2110	2453	2198	2163	2248	2832	2400	1577	2317	1859	1743	6368	1767	1656	1115	1041	2159	2074	3867	2166	2454	1554	2352	2221	2069	2679	2675	2327	1642	1892	1715	1726	6586	1532	1721	905	1016	2622		1532	2596	3007	2421	2009	2188
192	1852	3645	2143	2584	1620	2320	2230	2048	2454	2699	2447	1506	2096	1803	1909	6551	1579	1739	1064	1013	2334	1859	3657	2178	2509	1645	2367	2240	2185	2669	2688	2449	1453	2289	1554	1798	6355	1639	1855	1189	1005	2848		1543	2724	3345	2300	1986	2065
193	2097	3598	1811	2907	1723	2879	2184	2229	2440	2981	2353	1543	2413	1920	1754	6409	1618	1879	1079	966	2573	2062	3668	2123	2402	1663	2343	1990	2232	2502	2987	2317	1420	2274	1603	1513	6048	1832	1714	1029	1025	2743		1501	2302	3148	2498	1862	2041
194	1915	3614	2060	2556	1898	2331	1989	2010	2472	2955	2327	1766	2477	1928	1653	6893	1790	1815	1201	1133	2543	2297	3659	1854	2691	1501	2375	2240	2064	2518	2636	2304	1457	2282	1617	1569	6615	1852	1645	889	740	2535		1565	2513	2489	1932	2012	2132
195	2204	3842	2102	2667	1885	2374	2534	2112	2435	3139	2455	1702	2348	1874	1604	6445	1662	1813	993	907	2306	2069	3532	2088	2789	1587	2419	2084	2262	2747	2766	2299	1544	2161	1599	1624	6685	1571	1824	995	965	2595		1535	2438	3242	1847	1851	2095
196	2061	3331	1847	2660	1838	2184	2421	2183	2562	2706	2484	1784	2426	1585	1875	6878	1632	1810	1046	816	2548	1922	3803	2161	2279	1734	2441	2263	2110	2762	2735	2322	1427	2095	1427	1807	6583	1750	1666	1108	906	2718		1587	2519	3230	2069	1902	2125
197	1967	3526	2095	2788	1849	2247	2478	2115	2780	3098	2240	1598	2139	1788	1864	6811	1660	1685	889	890	2375	1779	3564	1953	2653	1851	2535	2271	2030	2766	2974	2312	1704	2123	1581	1666	6639	1584	1802	992	940	2517		1481	2433	2970	1976	1849	1864
198	1938	3647	2079	2905	1878	2246	2366	2247	2537	2708	2488	1729	2256	1891	1878	6644	1610	1771	988	893	2441	2018	3465	2124	2679	1668	2576	2377	1957	2626	2925	2358	1482	2146	1363	1626	6250	1763	1720	1029	1028	2622		1656	2632	3041	2228	2041	2100
199	2068	3810	1876	2684	1952	2370	2014	1718	2484	2857	2472	1880	2266	1790	1759	6488	1555	1773	995	790	2423	1810	3958	2185	2839	1689	2603	2376	2173	2424	2718	2272	1655	2052	1546	1702	6579	1603	1565	990	905	2724		1401	2498	3087	1923	2171	1903
200	2120	3336	2047	2712	1919	2345	2205	2122	2381	3049	2500	1660	2387	1688	1877	6517	1336	1772	1170	844	2423	1861	3516	1986	2800	1771	2554	1813	2036	2507	2913	2293	1382	2174	1614	1665	6531	1860	1766	1133	903	2708		1473	2751	3244	2098	1915	2097
201	2161	3367	2149	2606	1610	2252	1889	2160	2368	2724	2503	1662	2198	1862	1675	6652	1662	1734	911	871	2522	1901	3542	1922	2734	1584	2483	2150	2152	2593	2966	2098	1672	2189	1680	1568	6356	1671	1862	1158	963	2496		1775	2498	3033	1827	2030	1968
202	2046	3717	2053	2720	1934	2257	2343	2082	2504	2755	2331	1619	2112	1818	1867	6422	1674	1779	1018	690	2446	2201	3749	2057	2871	1851	2565	2291	2109	2713	2900	2119	1614	2217	1524	1878	6691	1708	1721	1188	753	2690		1627	2582	3311	1958	1990	1835
203	1894	3684	1972	2875	1934	2348	2465	1429	2453	3121	2358	1701	2426	1566	1716	6680	1636	1743	971	780	2307	2148	3689	2059	2947	1736	2555	2227	2040	2489	2786	2369	1585	2269	1802	1764	6256	1796	1787	1123	1109	2604		1807	2463	2471	1785	1865	2119
204	2079	3475	1993	2788	1786	2314	2135	2259	2589	3043	2313	1707	2489	1791	1868	6763	1689	1749	1094	1043	2163	1909	3825	1963	2754	1501	2681	1955	2261	2455	2769	2248	1575	2016	1646	1809	6390	1542	1769	1125	1072	2595		1475	2580	2955	1960	2121	1903
205	2015	3564	2179	2705	1972	2261	2051	1987	2563	3042	2190	1691	2414	1731	1818	6487	1823	1649	961	928	2431	2049	3761	1998	2775	1793	2142	2381	2058	2627	2729	2341	1421	1981	1630	1382	6546	1810	1839	1033	845	2695		1666	2565	3264	1920	1860	2061
206	2113	3825	2008	2822	1912	2395	2191	2082	2354	2917	2460	1702	2531	1580	1781	6679	1672	1804	1129	843	2420	2031	3682	2119	2868	1705	2590	2079	2271	2524	2610	2214	1321	1813	1664	1937	6675	1828	1664	1001	968	2562		1814	2268	3093	2031	1971	2173
207	1830	3630	1923	2951	1752	2148	2148	2153	2474	2852	2361	1518	2425	1800	1834	6724	1703	1714	883	718	2357	2016	3623	2000	2764	1831	2539	2317	1952	2582	2758	2215	1573	1850	1823	1708	6500	1711	1790	991	1020	2551		1617	2486	3213	2286	2015	1911
208	2106	3717	2039	2868	1784	2321	1704	2125	2519	2721	2411	1643	1985	1783	1648	6774	1713	1591	987	700	2306	1833	3651	2002	2494	1725	2481	1979	2045	2614	2598	2217	1632	1876	1717	1619	6219	1736	1819	1100	953	2661		1789	2616	3157	2018	1794	2012
209	2099	3963	1880	2937	2107	2256	2258	2242	2710	2767	2475	1672	2461	1730	1630	6638	1617	1692	1008	806	2433	2105	3838	2201	3007	1555	2526	2251	1983	2643	2787	2413	1417	2249	1717	1884	6648	1855	1716	1159	1029	2641		1566	2582	3179	1656	2019	2221
210	2000	3586	1983	2974	1590	2120	2003	1933	2395	2798	2310	1700	2497	1793	1976	6724	1717	1738	1097	847	2329	2084	3655	2154	2547	1698	2129	2321	2035	2861	2897	2272	1539	2149	1549	1919	6429	1615	1826	1033	979	2481		1944	2773	3098	1967	2066	2159
211	1991	3458	1865	2782	1794	2482	2342	2160	2440	2718	2501	1518	2310	1800	1805	6488	1863	1627	882	825	2369	1915	3843	2053	2850	1752	2327	2163	2194	2634	2757	2389	1593	1961	1756	1682	6465	1843	1784	1079	934	2688		1861	2574	3051	2168	1933	1902
212	1851	3553	2067	2630	1762	2189	2255	2365	2642	2947	2324	1512	2408	1762	1546	6597	1621	1802	960	968	2383	1857	3456	2102	2750	1773	2279	2060	2162	2850	2722	2273	1553	2023	1677	1933	6474	1654	1758	997	916	2536		1777	2497	2268	2207	1785	2065
213	1973	3634	2001	2768	1594	2344	2403	2047	2463	2902	2425	1683	2083	1724	1522	6794	1603	1593	1107	691	2275	1932	3403	2109	2852	1543	2053	2286	2152	2668	2711	2321	1566	2157	1552	1280	6401	1915	1824	1111	1012	2657		1761	2365	3222	2515	1952	1925
214	1915	3838	1932	2596	1863	2472	2485	2100	2674	2828	2421	1580	2112	1605	1731	6255	1826	1501	978	859	2403	2021	3602	2232	2709	1676	2348	2290	2091	2663	2862	2276	1450	2135	1540	1839	6320	1700	1772	939	842	2607		1891	2526	3185	2311	2101	2025
215	2243	3678	2031	2718	1763	2179	2226	2034	2465	2690	2535	1654	2338	1903	1796	6714	1420	1749	801	775	2405	2086	3677	2063	2833	1687	2655	2060	2205	2551	2816	2343	1510	2195	1578	1678	6744	1546	1864	1158	951	2627		1805	2352	2643	1992	2003	2032
216	2159	3721	1962	2673	1767	2188	2205	1636	2534	2876	2495	1626	2272	1832	1803	6681	1695	2054	972	819	2496	2017	3812	2111	2930	1755	2562	2237	2265	2552	2754	2371	1393	1963	1522	1892	6657	1760	1624	1139	1011	2600		1737	2532	3061	2411	2028	2087
217	2125	3532	2013	2841	1716	2307	2120	2220	2512	2701	2460	1418	2147	1655	1867	6470	1581	1690	1031	813	2509	2034	3605	2161	2826	1814	2512	2383	2165	2608	2823	2329	1350	1871	1596	1749	6495	1819	1730	1031	1083	2465		1973	2531	3195	2057	1991	2146
218	1839	3776	2021	2835	1758	2156	2187	2168	2568	2899	2399	1580	2242	1818	1713	6545	1709	1871	1026	1003	2307	1945	3645	2184	2739	1860	2437	2173	2115	2744	2715	2320	1696	2184	1542	1925	6415	1740	1732	1055	872	2487		1804	2647	2906	2201	1965	1966
219	2001	3648	2096	2671	1808	2511	2225	1972	2537	2779	2624	1530	2154	1859	1634	6638	1517	1940	923	765	2401	2184	3802	1823	2880	1984	2276	2410	2258	2531	2761	2306	1450	2111	1656	1858	6296	1641	1731	1141	966	2518		1733	2554	2880	2001	1891	2157
220	2093	3620	1889	2729	1983	2191	2207	2144	2623	2706	2430	1505	2447	1715	1750	6657	1721	1642	1104	811	2178	1816	3588	2097	2812	1907	2544	1934	2002	2665	2903	2403	1394	2162	1725	1851	6342	1708	1872	1110	1124	2542		1787	2428	3278	2016	1893	2111
221	2170	3720	1923	2795	1728	2265	2149	2038	2624	2682	2517	1616	2633	1849	1638	6619	1649	1654	1070	964	2478	2083	3619	1958	3165	1469	2598	2227	1947	2703	2841	2440	1395	1859	1405	1752	6431	1506	1460	1050	701	2466		1928	2615	2964	2158	1978	2009
222	1976	3591	1996	2924	1907	2298	2423	1526	2410	2964	2452	1510	2080	1616	1555	6705	1594	1750	1006	977	2007	1968	3555	1984	2800	1863	2431	2354	2111	2632	2608	2214	1545	1887	1771	1712	6332	1655	1714	957	977	2542		1911	2700	3092	1971	2050	1990
223	2030	3804	1979	2788	1849	2319	2209	2127	2518	2975	2445	1443	2142	1664	1816	6839	1758	1806	1134	910	2646	2056	3586	2005	2628	1696	2638	2163	2046	2603	2863	2092	1450	2183	1534	1708	6674	1768	1704	986	910	2514		1805	2569	3394	2421	1881	2100
224	1943	3550	2036	2829	1670	2216	2354	2180	2395	2845	2145	1529	2336	1874	1487	6360	1735	1756	1017	660	2349	2167	3540	2127	2884	1930	2577	2273	2267	2656	2883	2270	1358	1954	1741	1710	6304	1751	1620	1148	904	2646		2000	2590	3148	1839	1842	1969
225	2104	3713	2036	2744	1918	2434	2088	2178	2526	2912	2466	1710	2630	1858	1948	6381	1722	1703	872	819	2499	1956	3502	1996	2790	1836	2324	2268	2016	2508	2921	2417	1423	2212	1596	1711	6485	1916	1705	974	886	2673		1807	2549	3135	1851	2049	1891
226	1952	3544	1915	2824	1871	2772	2370	2162	2347	2874	2456	1781	2140	1888	1697	6385	1808	1953	904	996	2306	2040	3587	2119	2752	1666	2273	2310	1666	2780	2803	2242	1481	2276	1615	1693	6333	1792	1730	949	982	2701		1892	2619	3207	2018	1918	2144
227	2137	3465	2009	2837	1884	2460	2246	2293	2500	2955	2518	1710	2499	1806	1681	6539	2032	1741	941	730	2192	2071	3578	2022	2766	1801	2558	2467	2172	2635	2707	2169	1423	2020	1386	1668	6415	1738	1751	816	917	2607		1872	2387	3225	1902	1785	2036
228	2247	3598	2098	2683	1873	2215	2336	2093	2414	2872	2497	1538	2311	1778	1719	6499	1744	1815	1162	824	2446	1865	3556	2013	2694	1878	2522	2136	2149	2757	2817	2328	1567	2224	1522	1774	6276	1838	1694	967	839	2577		1872	2474	3183	1755	1759	2070
229	2032	3520	1891	2768	1805	2314	2341	1983	2462	2861	2431	1529	2265	1555	1759	6533	1727	1814	1049	768	2313	1835	3748	1960	2743	1843	2319	2200	2018	2582	2641	2355	1376	1882	1715	1699	6694	1766	1902	909	925	2836		1850	2396	3019	2305	1787	2008
230	2106	3747	2090	2616	1899	2166	2303	1700	2656	2708	2441	1512	2060	1804	1646	6796	1678	1649	1041	843	2360	2003	3561	2282	2739	1529	2712	1944	2160	2718	2732	2346	1427	2028	1616	1556	6620	1684	1767	1055	882	2350		1770	2467	3158	1888	1967	1935
231	1935	3756	1735	2634	1795	2257	2356	1911	2690	2930	2441	1497	2188	1828	1613	6527	1724	1792	931	828	2246	2052	3573	2182	2539	1888	2435	2026	2100	2675	2936	2245	1646	2125	1595	1682	6544	1650	1686	1073	876	2644		1821	2483	3001	1901	1997	1976
232	2089	3859	1962	2809	1939	2459	2607	2269	2472	2839	2249	1650	2507	1396	1839	6736	1623	1675	739	702	2343	1907	3852	2131	2809	1724	2562	2473	2026	2464	2825	2352	1580	2145	1608	1829	6591	1470	1760	996	1134	2629		2000	2627	3169	1810	1880	2106
233	1949	3584	1776	2808	1840	2348	2020	2015	2526	2643	2248	1607	2225	1937	1754	6778	1952	1636	932	870	2354	2019	3768	1995	2593	1651	2535	2256	2188	2639	2792	2311	1406	2140	1663	1819	6622	1799	1865	758	901	2736		2036	2594	3185	2107	1919	1850
234	1793	3527	2033	2838	1848	2148	2352	2220	2734	2813	2359	1472	2223	1790	1679	6521	1812	1812	1066	774	2383	1994	3586	2111	2715	1822	2357	2051	2219	2625	2891	2453	1431	2021	1791	1900	6616	1782	1898	1012	874	2519		1780	2510	3080	1962	1861	2049
235	1994	3540	1995	2763	1772	2272	2221	2238	2593	2877	2296	1559	2133	1877	1665	6509	1517	1859	895	887	2415	1992	3448	2105	2743	1615	2637	2169	2157	2592	2802	2330	1691	2124	1595	1715	6700	1634	1868	981	874	2526		1908	2437	3086	2042	1689	1963
236	1931	3635	1907	2838	1559	2229	2270	2127	2458	2898	2494	1686	2211	1865	1566	6529	1612	1837	1168	841	2301	2083	3514	2009	2755	1816	2524	2224	1995	2587	2608	2234	1601	1999	1497	1790	6363	1655	1681	1055	759	2506		2050	2667	3042	2240	1942	2041
237	1839	3497	1767	2604	1841	2055	2308	2075	2359	2777	2438	1499	2244	1611	1681	6573	1709	1765	896	737	2411	1802	3767	2182	2641	1517	2519	2348	2121	2880	2873	2381	1590	2121	1570	1717	6525	1814	1732	978	896	2538		1661	2595	3261	2006	1842	1928
238	1955	3736	1891	2552	2004	2363	2422	2062	2708	2688	2259	1561	2182	1774	1773	6305	1924	1914	1117	861	2390	2207	3783	1991	2976	1911	2459	2217	1895	2600	2954	2363	1622	1905	1792	1877	6473	1584	1778	1040	678	2565		1871	2704	2946	2042	1896	1795
239	1877	3545	1852	2793	1951	2344	2410	2077	2619	2992	2420	1714	2312	1863	1623	6832	1591	1785	853	771	2374	2066	3633	2085	2742	1617	2571	2254	2097	2361	2960	2241	1478	2107	1655	1714	6491	1614	1748	866	827	2451		1963	2637	3153	1711	1976	2172
240	2015	3791	2126	2658	1829	2132	2352	2234	2448	2835	2383	1782	2243	1815	1466	6630	1628	1772	876	898	2286	1857	3590	1868	2840	1625	2485	2064	2306	2602	2966	2219	1643	1974	1942	1807	6578	1798	1731	1073	871	2644		2150	2613	3056	1600	2022	1918
241	2173	3792	2079	2623	1884	2772	2368	2000	2461	2868	2431	1679	2124	1862	1865	6534	1638	1831	950	851	2156	2127	3688	2062	2795	1656	2463	1936	1920	2438	2750	2318	1441	2007	1851	1877	6777	1604	1783	802	956	2433		1752	2564	2485	2217	1824	2217
242	2128	3844	1963	2795	1538	2176	2186	2138	2624	2789	2315	1578	2510	1662	1791	6631	1582	1727	978	800	2628	1746	3826	2010	2828	1905	2624	1870	2223	2825	2843	2194	1632	2078	1375	1715	6665	1650	1682	768	810	2646		2013	2535	3067	2103	1935	1985
243	2075	3699	1913	2904	1896	2367	2493	2206	2496	2771	2327	1731	2539	1705	1785	6492	1608	1799	869	746	2456	2018	3624	2124	2809	1672	2496	2128	2192	2586	3034	2471	1473	1970	1499	1765	6525	1768	1590	967	901	2597		1727	2447	3102	2234	1813	2057
244	2085	3724	2051	2719	2008	2513	2313	2140	2496	2711	2471	1869	2360	1829	1962	6635	1917	1784	997	810	2380	2020	3731	2070	2793	1788	2500	2383	2315	2605	2828	2164	1609	1711	1597	1457	6706	1739	1757	932	815	2515		1843	2410	3217	2059	1777	1975
245	1965	3698	1769	2855	1868	2312	2290	1888	2344	2972	2335	1951	2474	1767	1656	6566	1651	1851	892	762	2523	2218	3735	2017	2856	1729	2463	2354	1920	2457	2825	2268	1468	1892	1584	1896	6696	1795	1847	980	668	2523		1930	2417	2962	2158	2111	1956
246	1971	3620	1792	2841	1776	2257	2378	2291	2393	2847	2283	1637	2397	1846	1755	6186	1808	1714	935	813	2417	2117	3414	2122	2707	1829	2577	2326	2170	2670	2893	2197	1641	1965	1876	1587	6691	1847	1704	848	740	2713		1946	2472	3195	1965	1812	1997
247	1926	3611	1977	2767	1868	2322	2468	2045	2270	2830	2326	1705	2160	1911	1667	6489	1599	1783	984	925	2365	1861	3574	2161	2868	1866	2474	2284	1997	2761	2772	2255	1314	1990	1806	1627	6349	1869	1935	996	942	2423		1883	2440	3033	2002	2007	1921
248	1967	3569	2014	2691	2002	2539	2246	2133	2517	2687	2352	1562	2410	1904	1651	6439	1587	1778	1052	896	2299	2000	3674	2205	2954	1806	2022	2093	1953	2446	2817	2348	1623	2093	1450	1861	6658	1903	1694	1002	862	2397		1789	2396	3012	2121	1649	2101
249	2003	3731	2076	3069	1853	2252	2105	2094	2452	2792	2473	1583	2019	1833	1700	6587	1689	1771	878	883	2243	1965	3793	2099	2839	1797	2463	1967	2253	2505	2819	2338	1491	2222	1454	1545	6637	1858	1657	978	871	2675		1822	2490	3257	2062	1942	1925
250	1958	3504	1972	2600	2085	2308	1930	1929	2690	2837	2372	1614	2376	1803	1945	6085	1648	1837	1117	886	2385	2002	3867	2280	3007	1639	2489	2056	2077	2386	2886	2279	1655	2137	1750	1970	6618	1793	1720	966	795	2921		1815	2559	2522	2135	1789	1864
251	1998	3851	1979	2682	1882	2225	2344	1715	2607	2772	2197	1758	2489	1890	1712	6547	1727	1726	865	839	2431	2084	3538	2196	2731	1865	2467	2315	2229	2384	2962	2149	1501	2040	1717	1756	6623	1734	1913	1064	926	2609		1804	2530	3144	2204	1617	2041
252	2140	3568	1837	2674	1995	2241	2233	2252	2684	2816	2384	1738	2441	1692	1728	6377	1707	1840	955	833	2265	1872	3614	2215	2593	1570	2505	1848	2138	2842	2775	2348	1661	1939	1572	1686	6412	1970	1718	1099	845	2671		1780	2532	1973	2105	1761	2133
253	1938	3601	1914	2736	1853	2138	2087	2100	2506	2828	2445	1622	2477	1856	1720	6749	1622	1869	963	1013	2351	2057	3808	2008	2811	1645	2457	2233	2029	2595	2799	2399	1593	1993	1548	1855	6635	1732	1711	889	784	2694		1950	2422	3101	2164	1718	1808
254	1961	3539	2123	2568	1650	2081	1948	2002	2401	2972	2339	1774	2125	1797	1718	6632	1840	1940	960	727	2229	2112	3824	2168	3198	1789	2593	1990	2066	2596	2836	2273	1659	2086	1499	1834	6531	1673	1758	910	837	2514		1776	2459	3264	2085	1696	1905
255	1937	3702	2076	2586	1995	2275	1858	2318	2736	2871	2263	1693	2468	1915	1698	6703	1711	1847	1017	836	2007	2101	3620	1961	2792	1800	2415	2452	1974	2469	2661	2322	1589	2069	1834	1819	6655	1935	1619	1209	1050	2553		1846	2491	2918	2125	1712	2056
256	2169	3697	1958	2788	1842	2416	2389	1959	2518	2722	2299	1654	2443	1724	1636	6596	1517	1677	749	899	2121	1841	3900	2354	2676	1776	2445	2085	2095	2557	2801	2485	1665	2146	1586	1602	6623	1924	1798	942	880	2370		1847	2492	3186	1852	1756	2096
257	2128	3639	1819	2778	1871	2295	2251	2096	2443	2925	2380	1662	2553	1799	1704	6681	1723	1918	982	941	2294	2017	3660	2188	2816	1838	2607	2042	2230	2479	2865	2285	1708	1993	1662	1769	6529	1835	1902	1004	840	2617		1719	2415	3070	2218	1795	2017
258	1972	3473	1893	2827	1765	2183	2275	2098	2642	2785	2308	1589	2484	1730	1665	6472	1699	2017	869	741	2555	2204	3834	1955	2800	1780	2511	2321	2312	2546	2777	2411	1723	2226	1671	1597	6653	1787	1880	1000	876	2785		1879	2273	3046	1995	1767	2036
259	2049	3685	1878	2830	1697	2400	1884	2019	2346	2967	2406	1704	2420	1752	1609	6552	1510	1910	1093	857	2313	2040	3497	1965	2726	1846	2525	2257	2071	2422	2564	2283	1413	1956	1728	1806	6553	1706	1838	959	1040	2825		1641	2588	2602	2021	1725	1978
260	2051	3578	1827	2629	1640	2223	2049	2314	2310	2838	2273	1516	2493	1746	1719	6397	1726	1692	1111	756	2428	2171	3693	1979	2825	1697	2560	2319	2118	2751	2664	2423	1675	1872	1798	1618	6482	1999	1644	1104	932	2740		1740	2501	3152	2115	1782	2198
261	2032	3622	1881	2641	1767	2193	2265	2132	2348	2898	2341	1705	2182	1628	1752	6686	1610	1691	995	953	2502	2052	3560	2018	2648	1789	2455	2172	1971	2669	2596	2237	1801	2070	1564	1801	6629	2062	1713	1067	836	2540		1926	2315	2986	2078	1654	1810
262	2055	3454	1909	2547	1849	2146	2407	2044	2770	2952	2214	1615	2351	1722	1776	6602	1897	1753	956	635	2343	1962	3658	2099	2636	1804	2068	2272	2074	2563	2970	2484	1629	1891	1473	1495	6523	1645	1886	1024	869	2684		1791	2255	2383	1877	1835	2014
263	2022	3460	1846	2765	1972	2196	2090	2190	2567	2843	2334	1769	2676	1773	1813	6536	1681	2045	838	799	2410	2177	3615	2395	2814	1829	2533	1799	2006	2402	2727	2345	1615	2018	1567	1941	6389	1879	1566	975	790	2614		1794	2481	2599	2199	1618	2008
264	2223	3685	1827	2789	1944	2289	2249	2052	2467	2744	2317	1661	2318	1678	1701	6362	1697	1661	935	1119	2441	1920	3559	1892	2856	1761	2298	2229	2116	2236	2801	2222	1492	2207	1401	1824	6796	2033	1832	948	717	2637		1969	2582	2232	2210	1907	2047
265	2130	3637	1935	2739	2083	2322	2330	1998	2646	2809	2383	1546	2387	1763	1744	6565	1723	1878	911	846	2523	1960	3714	2102	2791	2075	2715	2450	2050	2500	2738	2395	1673	2121	1613	2017	6595	1826	1663	1024	945	2775		1813	2277	3250	1722	1920	2010
266	2180	3731	1918	2757	1841	2170	2249	2065	2503	2867	2505	1742	2280	1753	1813	6625	1580	1802	961	727	2274	2020	3641	2000	2905	1633	2496	2150	2150	2395	2836	2335	1597	2115	1664	2010	6520	2040	1827	999	843	2658		1690	2494	3031	1894	1856	1953
267	2100	3721	1862	2813	1765	2314	2246	2422	2567	2832	2429	1654	2043	1795	1696	6772	1507	1828	794	917	2282	2048	3714	2072	2679	1603	2271	1883	1977	2701	2853	2203	1641	2015	1532	1722	6455	1983	1786	928	709	2665		1795	2550	2802	2160	1830	1878
268	2134	3609	2032	2776	1854	2167	1967	1962	2457	2844	2474	1732	2326	1843	1842	6464	1538	1909	1006	1011	2628	1976	3452	1941	2738	1795	2435	2222	2235	2560	3043	2254	1706	2139	1700	1952	6475	1914	1764	1041	867	2778		1839	2278	2579	2026	1845	2014
269	2144	3371	1928	2609	1656	2499	2176	2209	2397	2861	2463	1556	2129	1660	1703	6476	1769	1779	876	784	2343	2032	3624	2212	2639	1709	2567	2353	2118	2721	2874	2274	1707	2200	1658	1897	6536	1927	1900	997	763	2815		1811	2386	2252	1995	1832	1979
270	2290	3441	1947	3208	1642	2323	2368	2232	2487	2660	2237	1630	2227	1941	1732	6662	1561	1785	750	921	2325	2094	3666	1959	2756	1823	2573	2412	2121	2611	2958	2276	1709	2058	1411	1969	6507	2048	1688	994	878	2525		1701	2337	2952	1839	1870	2026
271	2092	3649	2036	2816	1742	2743	2256	2197	2386	2877	2414	1516	2413	1877	1663	6890	1766	1763	846	856	2341	1967	3688	1994	2752	1780	2277	2311	1922	2631	2774	2281	1610	2124	1557	1875	6565	2055	1789	1063	860	2598		1923	2450	3074	2022	1939	1987
272	2201	3498	2052	2770	1769	2176	2127	2264	2510	2785	2583	1481	2408	1647	1676	6519	1765	1861	999	896	2321	1813	3642	2254	2716	1646	2332	2186	1941	2615	2923	2403	1609	2205	1610	1798	6492	1984	1826	950	877	2578		1916	2517	2628	1954	1712	2037
273	2061	3830	1965	2725	1887	2402	2112	2175	2422	2593	2474	1563	2149	1545	1854	6659	1710	1826	959	849	2400	2105	3633	2263	2833	1685	2368	2285	2090	2700	2793	2297	1712	2133	1748	1722	6562	1973	1644	907	785	2711		1692	2332	3021	2022	1875	2130
274	2105	3615	2025	2546	1843	2309	2157	1983	2432	2549	2331	1648	2405	1786	1756	6877	1691	1938	882	784	2369	1914	3911	2135	2852	1566	2601	2030	2130	2649	2822	2345	1588	2113	1641	1834	6626	1677	1822	969	728	2674		1738	2580	2539	1961	1891	2009
275	2107	3580	2121	2780	1916	2143	1988	1969	2375	2676	2326	1544	2590	1804	1672	6447	1420	1768	957	880	2479	2042	4024	2166	2915	1805	2395	2353	2325	2596	2800	2210	1583	2073	1602	1713	6773	2003	1613	1012	940	2809		1675	2404	3172	2217	1974	1990
276	2123	3700	1937	2732	1782	2163	2135	2146	2594	2976	2305	1734	2249	1742	1603	6536	1615	1852	992	883	2222	1916	3533	1920	2759	1541	2515	2186	2021	2525	3008	2300	1781	1990	1462	1845	6557	2034	1755	1065	779	2745		1777	2386	2791	2203	1711	2003
277	1975	3469	1951	2609	1447	2708	1955	1889	2310	2794	2342	1694	2232	1819	1610	6539	1785	1816	953	765	2396	1846	3610	2016	2833	1755	2505	1957	2057	2658	2899	2430	1617	1984	1710	1982	6273	1979	1776	1103	772	2633		1570	2530	2808	2023	1905	1935
278	2080	3742	2107	2795	1667	2299	2075	2144	2632	2978	2453	1645	2239	1728	1786	6393	1840	1919	841	944	2307	1931	3566	2016	2675	1834	2105	2243	1889	2463	2735	2369	1610	2092	1681	1992	6717	2005	1565	1106	939	2675		1699	2345	2420	2188	1938	1801
279	1983	3632	1995	2722	1772	2175	2292	2276	2539	2877	2428	1580	2410	1649	1636	6497	1871	1878	924	754	2237	2095	3691	2074	2767	1390	2523	2363	2008	2637	2909	2212	1534	2121	1623	1820	6506	1988	1865	1026	794	2594		1768	2583	3246	2127	1810	1955
280	1975	3701	1952	2849	1797	2309	1883	2367	2581	2867	2352	1544	2119	1729	1726	6715	1558	2052	828	882	2347	2207	3742	2142	2812	1811	2416	2328	2217	2728	2717	2472	1574	2126	1773	1902	6835	1995	1752	936	856	2338		1711	2585	2767	2468	1841	1795
281	2102	3601	1994	2873	1750	2207	2113	2125	2353	2765	2297	1632	2673	1864	1739	7003	1880	2033	951	819	2347	2046	3899	2086	2727	1654	2519	2160	2203	2426	2808	2216	1565	2067	1709	1978	6469	1941	1972	872	842	2551		1867	2412	2455	2202	1790	1824
282	1866	3576	1913	2711	1957	2232	1943	2137	2505	2775	2242	1662	2461	1710	1696	6512	1674	1896	929	847	2420	2083	3534	1949	2779	1952	2453	2165	1935	2653	2750	2342	1587	2138	1595	1609	6633	1754	1795	886	965	2462		1748	2335	2285	1994	1799	1808
283	2001	3516	2130	2771	1693	2354	2093	2102	2611	2733	2477	1517	2560	1729	1814	6415	1637	1777	902	879	2408	1993	3605	2209	2520	1530	2514	1996	2283	2844	2894	2410	1608	2031	1856	1855	6625	2049	1842	1107	922	2397		1689	2307	2476	2166	1724	1998
284	2238	3729	1918	2899	1838	2348	2048	2126	2454	2738	2326	1526	2318	1703	1624	6425	1810	1714	903	746	2450	1961	3504	2372	2563	1783	2520	2336	2117	2305	2841	2262	1707	2254	1602	2113	6535	1929	1938	846	654	2688		1945	2450	2559	2077	1751	1929
285	2155	3617	1840	2709	1862	2111	2142	2178	2690	2740	2192	1778	2576	1753	1565	6649	1829	1672	1112	789	2585	2244	3624	2061	2904	1596	2469	2308	2185	2373	2798	2504	1543	1947	1809	1808	6786	1738	1822	1064	944	2627		1960	2291	2419	2144	1805	2046
286	2186	3700	2069	2725	1751	2469	2261	1922	2406	2683	2152	1605	2239	1696	1691	6548	1640	1708	999	728	2370	1730	3813	2257	2769	1795	2582	2363	1988	2514	2880	2203	1553	1979	1741	1527	6562	1881	1839	959	929	2344		1895	2437	3281	1966	1972	2047
287	2020	3661	1948	2686	1647	2396	2104	2045	2785	2744	2434	1645	2320	1719	1798	6478	1655	1836	949	765	2358	2109	3712	2234	2662	1549	2495	2345	2031	2617	2783	2381	1428	1908	1615	1926	6410	1941	1759	877	834	2670		1756	2648	2575	1973	1813	1814
288	2016	3607	1965	2712	1652	2198	1989	1977	2384	2902	2303	1692	2357	1666	1847	6572	1688	1752	1104	836	2424	2147	3607	2154	2811	1830	2726	2399	2213	2418	2804	2350	1702	2005	1604	1781	6287	1861	1895	1085	832	2643		1983	2402	2467	2273	1790	1956
289	1983	3690	1827	2647	1636	2221	2220	1972	2699	3058	2314	1521	2521	1849	1793	6162	1652	1717	1000	1028	2259	2161	3764	2091	2839	1691	2537	2131	2027	2522	2547	2107	1435	2193	1720	1841	6479	1767	1711	1191	815	2610		1786	2419	3165	2099	1740	2131
290	2023	3428	2069	2821	1886	2424	2412	1902	2654	2539	2448	1553	2491	1606	1696	6726	1763	1922	921	870	2369	2204	3647	2120	2802	1660	2587	2069	2033	2426	2809	2502	1731	2102	1618	1795	6529	1934	1814	992	912	2589		1770	2610	3295	2319	1871	2113
291	1957	3569	1917	2614	1787	2268	2351	2032	2407	3070	2273	1490	2355	1845	1758	6482	1573	1678	1125	917	2399	2090	3732	2022	2766	1758	2547	1919	2004	2485	2921	2105	1459	2184	1715	1780	6554	1881	1971	1109	932	2894		1739	2543	3349	2174	1843	2014
292	2074	3377	1956	2586	1733	2746	2334	2018	2434	2753	2422	1654	2206	1753	1575	6663	1859	1782	902	807	2397	2064	3638	2142	2784	1744	2396	2408	2006	2545	2672	2199	1419	2033	1435	1958	6538	1764	1880	972	771	2539		1664	2493	2572	1789	1781	1838
293	1893	3719	2057	2820	1834	2195	2255	2072	2524	2690	2383	1555	2423	1777	1720	6729	1804	1891	957	951	2726	2019	3712	2126	2788	1832	2261	2229	2109	2397	2971	2176	1639	2068	1607	1844	6590	2057	1775	988	836	2696		1894	2426	3233	2206	1881	2027
294	2198	3762	1713	2794	1757	2297	2214	2114	2463	2759	2331	1677	2301	1803	1712	6740	1609	1636	922	662	2419	1980	3736	1992	2671	1789	2356	2319	2132	2789	2700	2341	1754	2037	1641	1888	6488	1717	1582	1040	797	2768		1739	2486	2570	2173	1770	2074
295	2174	3636	1841	2679	1445	2271	1937	2138	2358	2874	2273	1419	2203	1829	1736	6682	1670	1788	1068	905	2407	1911	3733	2095	2590	1914	2545	2231	2249	2310	2770	2398	1880	2245	1606	1887	6404	1764	1774	891	838	2776		1610	2451	3200	1834	1783	2120
296	1950	3473	1874	2622	1701	2276	2103	2143	2444	2826	2281	1499	2247	1554	1733	6509	1983	1832	868	894	2702	2017	3912	2110	2798	1860	2243	2240	2058	2368	2822	2296	1675	1839	1420	1913	6572	1897	1695	930	854	2647		1888	2508	2218	2186	1885	2105
297	2060	3621	2000	2604	1545	2117	2272	1968	2628	2823	2453	1628	2440	1559	1705	6322	1727	1801	1068	935	2232	1943	3490	2127	2693	1620	2338	2272	2101	2455	2671	2366	1853	2001	1585	1679	6714	1700	1784	1000	784	2819		1718	2458	2389	2384	1997	2128
298	2274	3508	2014	2718	1635	2375	2171	2084	2965	2835	2268	1429	2041	1871	1797	6554	1491	1863	1122	781	2660	2133	3755	2168	2769	1901	2428	2366	2069	2589	2714	2250	1625	2061	1497	1780	6648	1718	1837	900	976	2568		1637	2488	2359	2343	1713	1857
299	2314	3797	2004	2800	1581	2325	2175	2102	2386	2952	2349	1684	2398	1854	1517	6567	1513	1831	935	713	2471	2115	3682	1993	2687	1644	2403	1982	2180	2292	2925	2304	1616	2264	1658	1693	6554	1731	1817	1120	886	2600		1680	2485	3160	1883	1927	2065
300	1858	3753	2029	2724	1746	2325	2181	1750	2451	2685	2282	1630	2465	1874	1926	6568	1584	1761	865	784	2135	1768	3697	1925	2897	1874	2515	2238	2115	2420	2659	2430	1793	2105	1710	1874	6539	1668	1823	1134	1084	2373		1665	2355	3311	2061	1923	2052
301	1878	3546	2088	2530	1533	2280	1884	1932	2548	2859	2428	1494	2371	1714	1696	6442	1743	1765	1001	903	2320	1864	3682	2059	2657	1580	2374	1999	2084	2704	2819	2162	1626	2159	1636	1810	6906	1653	1662	894	864	2388		1678	2555	3207	2117	1870	1841
[truncated: 101 more columns]

## Sheet: ASH to dia
Figure 5S-1D, 5S-1H
ASH::GCaMP3 F(A.U.)
Stimulus:	0
Genotype:	WT
N:	1	2	3	4	5	6	7	8	9	10	11	12	13	14	15	16	17	18	19	20	21	22	23	24	25	26	27	28	29	30	31	32	33	34	35	36	37	38	39	40	41	42	43	44	45	46	47	48	49
Frame (Pulse at 100)
1	1489	3061	7642	2441	4973	3791	2591	2146	5267	4536	1585	3672	1455	2985	777	4295	6605	3827	8338	4431	2912	1941	1454	7342	4013	7787	802	2511	989	2582	2397	5806	7588	6977	8090	4883	1269	5039	3265	1763	3230	8059	2407	4932	5366	2591	2001	4973	4314
2	1518	3081	7888	2569	4985	3704	2588	2186	4848	4701	1452	3568	1476	3183	874	4589	6531	3605	8408	4526	2987	1904	1621	7291	3911	7883	913	2554	911	2496	2191	5738	7464	7216	8287	4929	1063	4935	3230	1387	2936	7898	2658	5155	5318	2776	1845	5197	4372
3	1443	2962	7423	2572	4968	3805	2502	2034	5144	4345	1608	3639	1538	3270	1021	4316	6640	3332	8339	4256	2954	1811	1700	7195	3879	7937	930	2658	817	2627	2395	5368	7556	7336	8250	4891	973	4797	3267	1663	3127	8258	2506	4845	5388	2741	1984	5143	4150
4	1610	3059	7581	2503	5244	3716	2666	2036	4993	4452	1537	3735	1628	3202	909	4361	6509	3851	8494	4592	3071	1881	1506	7314	3766	7905	913	2433	696	2592	2234	5768	7575	7135	8168	5040	1179	4779	3394	1641	3242	7853	2503	4651	5153	2500	2131	5147	4180
5	1536	2772	7631	2514	5202	3807	2457	2388	5028	4332	1598	3389	1383	3087	1105	4276	6554	3891	8377	4417	3142	1847	1450	7316	4001	8242	945	2653	898	2655	2341	5691	7593	7254	8017	4872	1185	4792	3244	1628	3138	8107	2747	5080	5281	2632	2105	4962	4341
6	1487	2934	7832	2567	5187	3872	2669	2031	5332	4623	1614	3475	1553	3103	1053	4252	6752	3345	8335	4385	3008	1784	1206	7269	3923	7888	1035	2299	856	2469	2312	5790	7395	7215	8233	4944	1082	4727	3327	1805	3018	8061	2598	4767	5216	2601	1785	5296	3971
7	1519	2930	7785	2487	4961	3761	2323	2174	5423	4434	1452	3590	1643	3042	964	4453	6676	3266	8046	4502	3029	1867	1681	7664	3337	8171	902	2569	838	2584	2252	5563	6590	6738	8255	4969	1257	4823	3448	1654	3108	8142	2753	4909	5129	2730	2015	5130	4463
8	1591	2890	7911	2664	5263	3613	2683	2022	5550	4629	1933	3681	1578	3206	905	4301	6880	4129	8187	4217	2945	1495	1468	7206	3943	8005	933	2712	980	2591	2367	5820	7572	7298	8541	4932	1171	4654	3275	1545	3153	8055	2443	4787	5504	2530	1948	5196	4332
9	1666	3094	7687	2270	5105	3769	2405	2171	5221	4455	1800	3497	1585	3339	992	4124	6705	3494	8643	4513	3075	1810	1450	7514	3167	7813	878	2568	903	2438	2291	5574	7340	7042	8222	5226	1175	4903	3471	1594	2862	7784	2524	4952	5248	2613	2160	5433	4167
10	1640	3174	7924	2656	5328	3815	2529	2273	5568	4410	1479	3437	1541	3233	810	4524	6752	3982	8399	4602	2755	2020	1387	7266	3535	7803	626	2579	876	2635	2167	5691	7562	7263	8352	4919	1203	4781	3412	1634	3137	8301	2406	4944	5369	2772	1976	4987	4224
11	1474	3326	8049	2563	5106	3826	2530	2311	4989	4500	1731	3923	1405	3071	1036	4063	6568	3586	8331	4912	3097	1861	1538	7296	4248	7777	1036	2640	1058	2528	2176	5669	6586	7095	8380	5037	1116	4766	3363	1584	3142	7996	2517	4690	5308	2554	2340	5162	4253
12	1518	2718	7510	2483	5164	3782	2436	2225	5257	4501	1589	3803	1727	3173	889	4250	6545	3755	8325	4322	2930	1801	1860	7237	3966	7914	605	2386	966	2415	2323	5515	7349	6986	8485	4883	1048	4973	3679	1725	3108	8266	2534	4884	5407	2581	2109	4957	4317
13	1242	3089	7993	2289	5275	3655	2438	2087	5287	4465	1594	3437	1484	3117	754	4242	6757	3515	8132	4607	2960	1631	1395	7109	3790	7821	894	2466	833	2563	2371	5734	6403	7070	8045	5159	942	4801	3431	1491	3094	7818	2578	4943	5440	2565	1873	4803	4038
14	1651	2977	7796	2462	5064	3503	2616	2349	5630	4587	1456	3387	1413	2941	943	4333	6578	3602	8308	4529	3076	1945	1425	7592	3557	8006	871	2635	616	2655	2075	5428	7528	6851	8054	4928	1208	4954	3451	1730	3176	7964	2580	4850	5227	2655	1859	4727	4181
15	1367	3063	7929	2536	5347	3897	2516	2297	5640	4542	1767	3639	1615	3017	1110	3998	6711	3668	8009	4793	2949	1766	1513	7717	4083	7807	901	2513	711	2430	2146	5780	6552	7086	8453	5116	1182	4945	3388	1544	3124	7988	2335	4814	5351	2616	2190	3983	4105
16	1497	3056	7920	2557	5073	3706	2689	2159	5338	4306	1654	3544	1598	3063	896	4188	6496	3495	8586	4453	3057	1842	1645	7144	4192	7911	676	2446	864	2570	2240	5385	7359	7115	7920	5083	1134	5002	3225	1647	3066	7970	2502	4826	5342	2771	2040	3946	4243
17	1569	2957	7791	2523	5138	3720	2704	2163	5541	4555	1720	3683	1591	3093	978	4445	6551	3296	8394	4647	3013	1739	1366	7503	4359	7866	931	2840	939	2519	2338	5749	7379	7468	8005	5069	1117	4872	3285	1711	3097	8260	2734	4969	5230	2600	1980	4431	4244
18	1485	2802	7913	2637	5142	3810	2530	2219	5608	4638	1629	3404	1392	3123	1092	4380	6624	3852	8249	4441	3194	1727	1504	7520	4201	7633	863	2456	995	2821	2180	5865	7577	6932	8186	5120	1173	4612	3555	1536	2945	7832	2527	4663	5231	2709	2122	4820	4080
19	1645	2936	7919	2462	5373	3907	2570	2216	5273	4750	1496	3507	1522	2991	746	4359	6798	3797	8469	4855	2996	2178	1505	7230	4196	8061	830	2742	822	2556	2201	5741	7242	7149	8073	4998	1293	4886	3395	1636	3016	7656	2586	4752	5100	2685	1903	4671	4054
20	1527	3051	7852	2397	5197	3916	2629	2175	4976	4474	1700	3639	1372	2990	963	3969	6827	3728	8356	4623	3022	1803	1840	7429	4238	7946	610	2625	910	2542	2335	5747	7743	7256	8126	4982	1151	4940	3392	1570	3131	8232	2596	4920	5159	2781	2100	4875	4199
21	1620	3037	8173	2633	5242	3838	2743	2230	4605	4565	1430	3516	1542	3258	1046	4436	7003	3911	8346	4416	3134	2020	1831	7432	4306	7741	967	2467	750	2651	2349	5753	7191	7007	8386	5190	1199	4866	3366	1460	2923	7917	2320	4818	5092	2775	1983	5140	4053
22	1373	3070	7649	2523	5035	3824	2513	2178	5165	4396	1788	3443	1488	3309	932	4391	7015	3323	8337	4582	2952	1842	1413	7790	4240	8099	1022	2524	761	2468	2308	5654	7535	7274	8092	4941	949	4724	3186	1498	3127	8051	2245	4881	5456	3008	1944	5055	4076
23	1697	2988	7793	2593	5229	3787	2481	2332	5387	4491	1551	3522	1703	3100	1058	4263	6443	3302	8174	4568	2918	1945	1457	7587	4103	7853	680	2606	908	2641	2215	4962	7443	7038	8229	5186	1097	4851	3483	1647	3065	7998	2641	4971	5484	2600	2158	5073	4302
24	1541	3032	7699	2444	5360	3573	2497	2092	5428	4391	1634	3542	1452	3192	927	4080	6440	3659	8301	4494	2843	1887	1591	7527	3795	7798	968	2768	1004	2526	2222	5880	7413	7165	8239	4837	1006	4736	3290	1621	2971	8407	2492	5031	5198	2583	2057	5250	4078
25	1676	3173	8119	2518	5359	3809	2673	2164	5692	4609	1455	3670	1587	3106	791	4288	6850	3780	8382	4582	2845	1851	1309	7480	4154	7553	884	2652	910	2371	2155	5543	7277	7157	8255	5022	1177	4610	3258	1387	3387	8129	2678	4880	5426	2672	2004	5130	4229
26	1582	2997	7563	2763	5155	3925	2599	2243	5383	4494	1681	3651	1531	3087	1018	4407	6649	3445	8393	4553	2878	1877	1496	7335	4010	7846	908	2767	787	2558	2463	5754	7368	7018	8240	5017	1257	5049	3478	1485	3145	8166	2729	4779	5586	3052	1940	5184	4164
27	1435	3118	7652	2459	5232	3938	2758	2197	5516	4357	1609	3456	1624	3170	1093	4555	6673	3960	8557	4471	3237	2030	1780	7120	3524	7887	825	2462	719	2504	2605	5847	7783	7117	8189	5372	965	4927	3385	1664	3044	8076	2459	4947	5404	2948	1972	5116	3920
28	1519	3186	7982	2509	5220	4098	2563	2289	5587	4332	1324	3412	1543	3024	1072	4127	6856	4244	8558	4729	2980	1864	1477	7606	4037	7726	845	2727	726	2663	2359	5610	7308	7155	8010	5083	1178	4880	3344	1732	2999	7773	2625	4772	5429	2780	2017	5220	4072
29	1687	3152	7747	2669	5161	3730	2518	2187	5533	4564	1701	3592	1603	3134	1064	4408	6644	3456	8338	4428	2800	1791	1381	7114	3995	7772	856	2574	906	2485	2167	5719	7381	7155	8479	4950	1164	4710	3418	1575	2990	7770	2575	4941	5137	2992	2094	4924	3964
30	1545	2900	7819	2466	5244	3747	2439	2318	5786	4491	1833	3646	1687	2994	881	4288	6890	3800	8246	4611	3048	1661	1522	7739	4118	7804	1014	2364	730	2470	2291	6012	6491	7243	8242	5000	1108	4674	3037	1604	3049	8077	2403	4781	5488	2909	1967	5281	4317
31	1542	2824	7984	2537	5251	3942	2520	2209	5597	4600	1602	3544	1595	3091	832	4278	6478	3828	8717	4418	3188	1875	1411	7419	4209	7636	764	2447	861	2592	2357	5781	6398	7154	8044	4891	1021	4848	3220	1811	3148	8217	2568	4818	5407	3048	1935	5068	4236
32	1662	3120	7856	2517	5178	3834	2580	2307	5638	4103	1483	3560	1804	3005	948	4383	6790	3841	8315	4365	3122	2050	2006	7405	4000	7637	1109	2623	696	2463	2271	5622	6701	7006	8130	4860	1362	4654	3295	1597	3262	8022	2495	4891	5089	2588	1979	5066	4197
33	1519	3207	8000	2578	5242	3710	2618	2018	5456	4410	1778	3576	1525	3215	853	4348	6699	3469	8375	4313	3111	1854	1454	7428	3943	8005	546	2467	909	2561	2020	5827	7245	7086	8140	5086	1208	4622	3267	1505	3272	7781	2561	4843	5255	3076	2129	5210	4361
34	1460	2942	7737	2529	4932	3710	2454	2249	5664	4493	1751	3515	1516	3140	968	4238	7017	3297	8480	4609	2992	2114	1657	7538	3954	7796	1068	2460	926	2594	2444	5770	6757	7226	8348	4877	1000	4834	3326	1713	3004	8076	2733	5025	5268	2899	1969	4971	4307
35	1620	3039	7850	2699	5170	4028	2399	2257	5563	4703	1572	3567	1443	3208	1040	3931	6705	3998	8441	4584	3145	1837	1531	7266	4191	7908	1092	2620	700	2635	2432	5835	7210	7107	8215	4795	1271	4635	3254	1732	3045	7891	2519	4832	5195	3027	1997	5253	4230
36	1605	3059	7852	2487	5447	3893	2640	2148	5579	4349	1885	3503	1590	3081	968	4407	6689	3484	7998	4684	3245	1853	1425	7572	4063	7974	872	2764	762	2655	2371	5658	7569	7147	8144	4985	1246	4767	3330	1554	3111	8006	2486	4771	5235	2802	2006	5069	4255
37	1432	3013	7836	2722	5117	3862	2456	2258	5659	4497	1669	3641	1450	3013	976	4337	6582	3910	7993	4519	3136	2046	1468	7541	3303	7765	680	2636	899	2499	2291	5884	7514	7311	8115	4957	1305	4764	3448	1415	2956	8054	2336	5098	5115	2877	1991	5223	4340
38	1652	2934	7784	2318	5052	3654	2362	2288	5534	4654	1705	3492	1463	3253	805	4264	6473	4023	8120	4475	3081	1922	1404	7750	4185	7849	900	2561	895	2479	2197	5621	7541	6865	7826	4954	1173	4703	3391	1436	3132	8261	2483	4997	5435	2873	2104	5068	4152
39	1566	3126	8068	2787	5106	3827	2702	2212	5499	4356	1766	3379	1720	3114	912	4323	6533	4020	8267	4545	3017	1688	1412	7244	4014	8032	904	2755	815	2540	2225	5548	7541	7177	7981	5009	1249	4847	3542	1589	2986	8099	2634	4650	5256	2789	2003	4997	4173
40	1542	2989	7782	2347	5165	3999	2644	2328	5650	4484	1908	3586	1486	3077	1023	4462	7004	3978	8019	4234	3134	2073	1782	7525	4029	7881	979	2688	950	2578	2331	5735	7243	6968	8208	5057	1133	4944	3446	1672	3111	7529	2570	4895	5372	2718	1967	5123	4219
41	1546	2984	8183	2621	5200	3960	2337	2085	5528	4311	1851	3717	1595	3130	981	4367	6707	3471	8252	4463	2905	1917	1875	7765	4252	7933	978	2451	707	2462	2197	5650	7792	7300	8424	5270	918	4941	3317	1440	3062	8053	2511	4834	5413	2892	1926	5208	4190
42	1624	2784	8075	2609	4971	4146	2538	2311	5414	4508	2045	3707	1378	3037	856	4552	6785	3942	8168	4766	2982	1856	1618	7436	4079	7970	848	2461	805	2523	2263	5703	7438	6982	8068	4826	1032	4766	3402	1567	2964	7905	2622	4778	5029	2930	2096	4817	4173
43	1756	2969	7833	2578	5009	3879	2579	2109	4983	4571	2002	3879	1508	2982	867	4113	6499	3533	8081	4438	3016	1813	1238	7445	3899	7729	756	2322	826	2486	2205	5762	7247	7331	8108	5061	1194	4914	3388	1709	3105	7956	2619	4585	5129	2665	1979	4942	4029
44	1455	2892	7868	2485	5105	4006	2639	2266	5432	4391	1627	3474	1584	3200	1107	4157	6676	3589	8375	4426	3022	2119	1810	7223	3952	7616	1052	2355	757	2589	2177	5574	7459	7161	8061	5072	1348	4698	3545	1517	3166	8099	2363	4910	5054	2942	1944	5056	4214
45	1577	2915	8146	2394	4927	3736	2555	2194	5277	4558	1691	3447	1554	3397	786	4125	6871	3685	8384	4250	3115	1712	1712	7252	3981	7589	793	2895	775	2544	2251	5510	7377	6916	8209	5085	1100	4651	3291	1628	3040	8104	2652	5019	5158	2948	2106	5033	4373
46	1458	3232	7923	2632	4934	3846	2391	2378	5619	4636	1748	3147	1678	3192	932	4621	6346	3859	8268	4470	2852	1715	1330	7447	4218	7864	700	2448	1040	2574	2393	5611	7823	6930	8163	4934	1217	4720	3307	1669	2989	8072	2534	4891	5292	2986	1856	5104	4464
47	1422	2934	8230	2691	5369	4374	2562	2367	5434	4629	1784	3667	1563	3156	735	4222	6744	3984	8362	4371	2991	1954	1533	7581	4138	7807	728	2781	1073	2450	2262	5663	7303	7209	8091	5135	1207	4774	3451	1585	3140	7855	2571	4847	5524	2738	2036	5031	4261
48	1559	3090	8043	2448	4945	3961	2675	2217	5441	4285	2059	3575	1482	3149	1021	4248	6845	3827	8409	4368	2949	1801	1680	7512	4440	7990	577	2731	770	2587	2210	5709	7480	7056	8213	4922	916	4735	3346	1519	3099	8002	2720	5078	5566	3100	2140	5285	4204
49	1719	2951	8285	2673	5077	4100	2562	2224	5459	4456	1972	3456	1475	3162	1108	4379	6533	3483	8323	4436	3089	1820	1499	7591	4166	7637	1011	2369	765	2540	2365	5911	7495	6897	8080	4938	972	4845	3288	1570	3113	7828	2542	4933	5386	2537	2118	5111	4052
50	1476	3181	8146	2706	4993	4238	2541	2258	5383	4425	1496	3494	1563	3110	1108	4309	6503	3531	8397	4315	2927	2000	1874	7510	4290	7955	1043	2935	786	2547	2210	5661	7223	6999	8088	5046	1167	4631	3051	1620	2978	7869	2648	4744	5190	2821	2074	5108	4261
51	1467	2924	8065	2377	5057	3981	2714	2219	5275	4492	2027	3845	1648	3198	865	4576	7124	3658	8430	4488	2821	1863	1572	7258	3947	7705	897	2529	858	2602	2458	5612	6430	7085	8399	4809	1011	4616	3435	1389	2858	8316	2599	4812	5750	2720	2110	4783	4316
52	1501	3106	8172	2625	5113	3959	2505	2044	5239	4511	2044	3520	1565	3033	982	4302	6925	3862	8431	4384	3153	1811	1426	7555	3937	7925	1003	2405	891	2657	2213	5736	7531	7298	8222	4926	1106	4902	3469	1487	3015	7992	2479	4839	5429	2651	1986	5358	4149
53	1581	2983	7946	2635	5198	3853	2569	2269	5070	4566	1887	3392	1609	3157	875	4430	6791	3837	8514	4505	2869	1892	1948	7647	3929	8077	796	2542	803	2720	2223	5636	7507	7178	7972	4855	1203	4951	3411	1527	3009	8343	2490	4929	5500	2959	2005	5100	4319
54	1500	3020	8290	2634	5427	4014	2448	2249	5335	4484	1877	3572	1476	3146	897	4529	7194	3505	8502	4378	3038	2264	1546	7498	4030	7761	924	2823	690	2684	2333	5603	7494	7129	8200	4948	1068	4779	3373	1541	3027	7815	2688	4889	5383	3015	1964	5303	4088
55	1686	3042	7891	2474	5310	3666	2381	2171	5130	4530	1982	3386	1754	3174	1056	4493	6495	3572	8462	4397	2947	1857	1801	7847	3963	8005	840	2682	771	2567	2126	5568	7500	7017	7939	5046	1251	4735	3295	1481	3189	8130	2488	4725	5348	2944	1998	5088	4197
56	1674	3032	7910	2509	5182	3769	2621	2258	5394	4730	1970	3671	1495	3228	1105	4220	6604	3618	8359	4192	2977	1877	1568	7281	3817	7913	587	2587	795	2586	2307	5734	7400	7061	8213	5020	1005	4784	3346	1473	2887	7855	2553	4970	5619	2995	1919	5270	4145
57	1530	2980	8205	2442	5409	3739	2499	2186	5355	4402	1871	3710	1549	3107	906	4441	6322	3831	8133	4085	2828	1979	1632	7411	3955	8038	715	2582	958	2347	2149	5632	6676	7082	8154	4857	1109	4762	3326	1402	3338	8102	2509	4989	5561	2948	1991	5193	4222
58	1415	3084	8034	2529	5346	3701	2506	2270	5679	4560	1843	3563	1531	3127	781	4312	6644	3292	8667	4657	3068	1904	1373	7269	3992	8253	709	2827	764	2534	2388	5732	7575	7232	8253	4830	1079	4670	3381	1526	3080	7768	2526	5049	5368	2660	2046	5217	4196
59	1645	2993	8198	2515	5152	3803	2453	2029	5622	4491	2068	3511	1611	3036	905	4167	7492	3524	8378	4185	2995	1756	1444	7350	4002	8011	880	2945	699	2533	2255	5832	7852	6979	8199	5049	1046	4738	3312	1531	3163	7957	2585	5077	5755	3080	2022	5140	4414
60	1504	3026	8124	2568	5181	3738	2336	2369	5595	4441	1693	3453	1737	3143	1138	4308	7143	3675	8282	4530	3156	1946	1373	7568	3998	7780	833	2812	723	2388	2228	5765	7116	7488	8017	4944	1044	4600	3416	1498	2936	7925	2531	4991	5511	2751	1966	5224	4193
61	1486	3011	8077	2442	5235	3844	2583	2319	5002	4274	1809	3554	1513	3206	1013	4144	6816	3935	8211	4316	3006	2060	1481	7495	4180	8086	829	2845	828	2582	2197	5308	7405	6985	7951	5010	1123	4774	3133	1463	3001	8204	2483	4663	5357	2743	2018	5104	3983
62	1455	3093	7897	2446	5210	3598	2569	2364	4648	4459	2278	3568	1735	3014	974	4395	7264	3803	8309	3923	3083	2250	1494	7691	4174	7892	766	2949	644	2583	2369	5695	6396	6992	7892	5265	1087	4910	3063	1655	3294	7927	2461	5283	5711	2878	1824	5227	4323
63	1524	2901	7998	2439	5317	3693	2497	2071	4163	4660	2225	3774	1589	3118	939	4399	6452	3481	8609	5279	3198	1839	1565	7189	4209	8194	952	2618	876	2436	2267	5487	6812	7133	8232	5032	1042	4685	3282	1691	3081	7881	2558	4849	5560	2860	1930	5233	4360
64	1397	3100	8073	2517	4996	3816	2312	2164	3665	4396	2184	3888	1596	2943	955	4078	6508	3929	8297	4355	2836	1842	1640	7344	3827	8062	921	3013	919	2541	2280	5599	7481	7034	8105	4939	959	4717	3065	1550	3161	8089	2773	4852	5744	2797	2026	5169	4158
65	1507	3106	8324	2465	5193	3710	2652	2300	3616	4508	1741	4087	1584	3235	933	4258	6445	3798	8490	4443	2905	1791	1711	7498	3843	7950	529	2548	956	2644	2305	5559	7135	6884	8197	4936	1214	4723	3063	1442	3161	8347	2484	4786	5504	3074	2147	4787	4356
66	1607	2974	8244	2549	5307	3768	2472	2287	4045	4608	1779	3980	1447	3231	881	4350	6731	3543	8217	4433	2908	1730	1556	7486	3541	7996	787	2949	996	2672	2336	5603	7271	6948	8226	5082	1258	4653	3457	1405	3111	7989	2526	4911	5537	2912	2052	4961	4366
67	1528	2974	7952	2599	5267	3820	2432	2166	4001	4741	1764	3894	1601	3002	918	4265	6707	3696	8609	4335	3280	2077	1263	7505	4241	7940	900	2833	1002	2451	2237	5825	7077	7257	8384	5018	1178	4976	3460	1428	3141	8120	2502	4814	5602	2834	1931	5140	4255
68	1620	3190	8195	2405	5446	3780	2582	2159	3750	4285	1654	4346	1489	3036	823	4147	6387	3843	8399	4031	2893	2046	1418	7499	4019	7894	689	2814	877	2471	2366	5669	7504	7114	7882	5163	1150	4720	3286	1337	3027	7990	2542	4843	5496	2747	1895	5159	4238
69	1609	3005	8135	2444	5397	3500	2526	2375	3734	4334	1884	3596	1624	3221	748	4367	6553	3531	8380	4455	3101	1870	1443	7589	4096	8006	897	2715	651	2641	2226	5673	7456	7254	8450	4974	995	4675	3302	1571	2992	8033	2611	4888	5235	2999	2046	4977	4359
70	1511	2868	8142	2598	5443	3648	2535	2224	5153	4565	1711	3480	1717	3218	939	4119	6519	3518	8631	4350	2999	1888	1377	7471	3889	7918	587	3028	775	2633	2297	5749	7172	7017	8098	5096	1154	4856	3367	1611	3121	7836	2552	5014	5534	2758	2294	5238	4405
71	1594	3085	8251	2451	5107	3719	2504	2115	5229	4356	1647	3423	1474	3130	1045	4310	7232	3573	8549	4313	2884	1733	1536	7615	3960	8165	748	2615	862	2687	2096	5701	6426	7067	8268	4801	1070	4699	3149	1625	3149	8181	2806	4864	5392	3050	2113	5360	4351
72	1375	3057	8045	2446	4426	3768	2338	2193	5520	4677	1661	3755	1564	2962	936	4220	6740	3448	8627	4317	3158	1967	1396	6626	4044	7708	697	2762	864	2568	2111	5496	6792	7022	8272	5010	1061	4554	3325	1433	2940	8188	2536	4821	5209	2811	2167	5077	4052
73	1638	2943	8018	2521	5156	3865	2568	2333	5307	4583	1499	3321	1856	3073	873	4342	7087	4058	8427	4397	3181	1879	1521	7752	3957	8031	797	2749	841	2502	2142	5620	7644	7234	7964	4915	1172	4684	3201	1574	3005	8202	2543	4879	5570	2951	2269	5308	4072
74	1597	3195	7688	2497	5448	3847	2675	2152	5660	4624	1606	3456	1630	3109	837	4537	6422	3355	8368	4557	3083	2009	1486	7659	4104	7841	846	2804	775	2660	2220	5593	7440	7202	8376	4921	1223	4697	3217	1541	3098	7829	2475	5101	5370	3066	2160	4950	4303
75	1551	3107	7973	2615	5202	3748	2612	2328	5351	4357	1567	3342	1541	3146	1105	4414	7323	4050	8338	4320	3197	1983	1328	7601	4108	7877	929	2710	855	2714	2295	5639	7349	7327	8091	5065	1383	4631	3058	1476	3123	8030	2572	5055	5550	2776	2145	5482	3981
76	1662	3065	7813	2641	5224	3712	2549	2180	5230	4563	1794	3811	1653	3204	971	4184	7095	3928	8305	4256	3146	1945	1286	7514	4068	7845	825	2787	886	2590	2194	5771	7544	7118	8220	4954	1198	4760	3195	1623	2915	7885	2595	4794	5590	2614	2196	5012	4204
77	1539	2938	8299	2560	5324	3881	2624	2037	4739	4531	1657	3875	1569	3104	866	4302	7228	3486	8205	4527	3238	1714	1361	7620	4086	7542	887	2931	971	2503	2164	5620	7539	7337	8156	4904	1199	4723	3198	1469	3315	8064	2448	4935	5323	2907	2307	5054	4118
78	1285	3075	7889	2720	4261	3818	2458	2247	4688	4627	1641	3818	1524	3121	978	4095	6969	3529	8675	4208	2962	2072	1344	7646	4055	7916	650	2555	771	2435	2194	5852	7208	7294	8205	5037	1054	4384	3136	1427	3071	7940	2674	4772	5410	2802	2150	5136	4402
79	1439	3022	7863	2421	4201	3734	2537	2162	5065	4596	1823	3877	1275	3103	1009	4567	7071	3871	8343	4590	3153	2190	1383	7609	3641	7982	1037	2610	879	2518	2329	5899	7362	7362	8193	5193	1167	4814	3215	1548	3070	7920	2622	4894	5696	2818	2176	5167	4249
80	1499	2841	8184	2619	5165	3754	2553	2255	4894	4556	1741	3447	1463	3096	1075	4319	7088	3549	8242	4322	2916	1788	1614	7364	3947	7756	833	2893	951	2609	2247	5743	7257	6972	8193	5109	1015	4580	3702	1596	2879	7920	2673	4893	5540	2930	2125	5124	4349
81	1619	3053	7472	2565	5307	3644	2528	2299	4423	4748	1572	3979	1576	3167	1095	4023	7082	3455	8228	5121	3080	1987	1486	7860	3893	7658	796	2605	782	2629	2259	5621	7299	7037	7980	4996	1154	4664	3311	1591	3005	8127	2674	4831	5352	2927	2180	5132	4199
82	1524	3008	7699	2616	4629	3777	2568	2303	5605	4395	1720	3839	1457	2815	880	4320	6534	3642	8372	4529	3235	1788	1502	7686	3785	7769	836	2784	995	2388	1988	5491	7496	7279	8098	4866	1321	4768	3089	1575	2895	7972	2680	4934	5285	2851	2199	5048	4167
83	1621	3093	7896	2731	4332	3738	2244	2192	5151	4533	1751	3713	1407	3036	970	4259	6892	3332	8016	4981	3238	2003	1330	7298	3813	7686	941	2823	910	2781	2326	5443	7322	7062	7944	5192	1213	4637	3070	1728	3127	8043	2559	4916	5464	2856	1957	4836	4125
84	1570	3213	7824	2586	4419	3785	2462	2274	5703	4508	1750	3476	1629	3201	887	4236	7064	3708	8492	4437	3012	1924	1486	7391	4075	7750	882	2637	965	2424	2407	5664	7634	7233	8366	5010	1102	4698	3092	1646	3225	8126	2371	4773	5386	2843	2050	5246	4332
85	1695	3046	7450	2417	4292	3642	2456	2147	5579	4428	2164	3430	1734	3097	970	4347	7286	3336	8375	4592	2999	1821	1722	7887	4256	7784	705	2716	914	2585	2241	5683	6914	7056	8280	5193	1147	4742	3113	1700	2971	8049	2530	4733	5515	3059	2052	5195	4164
86	1543	2879	8010	2431	5231	3819	2603	2362	5893	4627	1609	3904	1458	3003	884	4439	7342	3652	7912	4354	3089	1760	1400	7846	3938	7588	1167	2714	819	2502	2192	5758	7432	7439	8373	5077	1141	5018	3208	1606	2825	8209	2522	4834	5355	2702	2161	5424	4391
87	1440	2901	7866	2755	5371	3731	2499	2310	5269	4176	1740	3812	1588	3071	920	4476	6732	3697	8684	4557	3012	1717	1426	7719	4021	8046	933	2521	737	2640	2042	5435	7349	6984	8129	5247	1088	4786	3057	1533	3124	7787	2609	4775	5236	3200	2282	5131	4260
88	1662	3105	7966	2530	5438	3944	2474	2244	5456	4440	1606	4023	1601	3157	864	4269	6835	3328	8112	4328	3117	1854	1493	7389	4000	7697	763	2871	880	2530	2248	5583	7374	7351	8316	4964	1124	4474	3193	1692	2967	7949	2653	4889	5198	2913	2013	5229	4108
89	1456	2938	7600	2655	4310	3939	2572	2190	5512	4488	1924	3901	1578	3104	886	4111	7351	3680	8332	4150	2853	1867	1412	7511	3967	7797	866	2927	966	2543	2106	5720	7104	7510	8216	5006	1155	4617	3375	1440	3073	8005	2798	4895	5246	2904	2215	5319	4007
90	1654	3262	8086	2617	5067	4202	2424	2137	5703	4700	1875	3547	1387	3143	1121	4024	7082	3456	8210	4603	3194	1720	1484	7232	3999	7630	1015	2762	873	2693	2213	5560	7375	7250	8301	4846	1243	4794	3103	1443	3170	7948	2598	4911	5272	2823	2199	5216	4098
91	1335	3131	7785	2507	5503	3714	2576	2191	5577	4544	1733	3771	1499	3011	977	4231	6920	3415	8609	4361	3178	1798	1707	7468	4095	8030	647	2281	777	2605	2364	5469	7576	7131	8296	5240	931	4670	3233	1577	3291	7954	2638	4829	5251	2996	2171	5018	4338
92	1613	2958	7609	2661	5210	3850	2541	2339	5261	4479	1781	3970	1583	3178	1109	4353	6641	3862	8190	4421	3157	1622	1675	7779	4035	7923	1028	2961	825	2456	2357	5686	7333	7522	8138	4975	1173	4799	3102	1690	3202	7862	2371	4836	5185	2818	2158	5159	4149
93	1650	2887	7939	2531	4460	3730	2513	2063	5506	4524	1611	3161	1493	3087	964	4144	7072	3625	8110	5088	3048	1830	1486	7414	3840	7605	929	2946	839	2586	2286	5702	7259	7127	8448	4891	1169	4745	3122	1456	3333	7916	2553	4764	5355	2901	1832	5170	4092
94	1771	3031	7961	2482	5245	3679	2501	2123	5588	4683	1699	3446	1351	2985	1003	4378	7003	3562	7947	4549	3086	1833	1396	7418	4201	7899	827	2135	955	2486	2281	5683	7572	7299	7899	5075	1065	4729	3069	1675	3063	7975	2770	4693	5181	2682	1985	4914	4043
95	1461	3039	7835	2434	5391	3827	2659	2184	5364	4412	1659	3509	1484	3196	926	4516	6962	3434	8452	4455	3070	1884	1255	7331	4076	8274	828	2644	917	2543	2583	5469	7780	7103	8189	4928	1026	4935	3503	1569	3273	8053	2464	4991	5371	2996	2316	5417	4388
96	1400	3050	7981	2590	5266	3899	2558	2033	5247	4395	1679	3562	1520	3088	1125	4569	7122	3400	8238	4451	3180	1701	1624	7411	3862	7641	892	2251	895	2624	2341	5504	7249	7046	7994	4881	1156	4683	3243	1464	3122	7877	2474	4651	5314	2878	2166	5048	4105
97	1391	2981	8099	2672	5190	3762	2508	2027	5364	4677	1427	3251	1615	3049	917	4012	7229	3479	8104	4385	3038	1751	1371	7560	3767	7891	786	2615	831	2377	2287	5704	7615	7240	8196	4986	920	4925	2982	1667	3119	8153	2665	4939	5192	2995	2241	5465	4365
98	1400	3077	8067	2642	4400	3617	2423	2216	5355	4647	1624	3224	1464	3163	896	4109	7141	3478	8234	4857	3181	1933	1276	7423	4083	8018	908	2737	845	2734	2265	5923	7587	7215	8417	5113	1044	4784	3219	1799	3232	7938	2648	4863	4888	2937	1853	5185	4289
99	1569	3146	7998	2560	5033	3492	2721	2245	5552	4818	1775	3410	1734	3116	891	4152	6929	3494	8051	4220	3026	1768	1355	7228	4052	7686	888	2782	1004	2540	2167	5696	7583	7245	8086	5181	1014	4833	3055	1596	3201	8032	2551	4804	5486	2843	2358	5384	4041
100	1514	3052	7878	2532	4572	3751	2517	2208	5442	4601	1734	3676	1667	2938	997	4078	7190	3569	8359	4411	3181	1808	1712	7507	4148	6536	831	2703	862	2576	2162	5716	7691	7336	7981	4702	1102	4654	3198	1404	3210	7965	2475	5393	4991	2967	2072	5177	4228
101	1426	2861	7773	2510	4452	3599	2261	2326	5485	4489	1975	3342	1680	3216	959	4302	7183	3494	8281	4210	3044	1790	1375	7360	3699	8037	935	2774	899	2388	2026	5830	7479	7189	8227	5180	1260	4870	3106	1926	3051	7980	2636	4725	4985	3042	2174	5030	4331
102	1478	3095	7956	2505	4503	3681	2352	2211	5470	4560	1727	3674	1858	2909	1047	4632	6383	3683	7992	4553	2937	1999	1476	7194	4005	8149	839	2852	931	2578	2152	5578	7515	7482	8383	5269	1235	4811	3120	1585	3088	8212	2420	4818	5328	2736	2016	4936	3896
103	1514	3051	7921	2518	4410	4136	2517	2104	5631	4291	1715	3685	1723	3150	1025	4109	7070	3636	8493	4240	3185	2018	1392	7242	3981	7744	1073	2799	747	2567	2279	5900	7207	7222	8099	5109	1265	4755	3210	1694	3065	7928	2447	4879	5534	2899	2002	4635	4233
104	1497	2994	8053	2636	5268	3797	2498	2295	5468	4750	1699	3845	1497	3147	899	4214	7003	3576	8159	4903	2871	2108	1459	7475	4048	7506	921	2957	933	2450	2325	5562	7629	7344	8170	5172	1305	4810	3156	1510	3147	7961	2491	4843	5704	2972	2027	4991	4104
105	1399	3033	7998	2639	5067	3665	2373	2343	5638	4638	1578	3785	1526	3089	878	4305	6818	3512	8579	4374	3022	1778	1905	7519	3823	7933	860	2890	912	2701	2309	5541	7400	7212	8229	4944	1130	4832	3128	1734	3243	7940	2439	4966	5369	2715	2039	4848	4275
106	1510	3036	7850	2503	4608	3714	2442	2148	5710	4481	1790	3438	1694	3171	874	4291	6536	3886	8415	4317	3014	1900	1404	7416	3929	7628	812	2759	822	2572	2176	5517	7329	7347	8101	5069	1067	4718	3236	1609	3041	8077	2554	5032	5585	2902	2072	4918	4202
107	1538	3025	7928	2613	5353	3827	2285	2412	5735	4402	1706	3892	1816	3168	961	4312	7025	3527	8114	4282	2982	1904	1661	7541	4015	7731	926	2819	1001	2472	2173	5458	7451	7469	8395	4893	1127	4587	3165	1690	3005	7801	2713	4869	5383	2909	2172	5212	4106
108	1535	3056	8045	2603	4499	3678	2580	2499	5576	4549	1759	3665	1557	3050	863	4413	6888	3545	8159	4434	3066	1714	1742	7478	4322	7692	1054	2906	780	2546	2144	5337	7402	7313	8181	5020	1052	4780	3065	1612	3217	7819	2635	5029	5434	2761	2109	4866	3980
109	1542	3135	7689	2528	4461	3701	2364	2230	5580	4591	1776	3674	1631	2877	895	4276	7247	3501	8160	4525	3160	1875	1647	7622	3752	7684	925	2617	1035	2664	2400	5526	7419	7413	7952	4938	1279	4675	3164	1664	3083	7718	2445	4954	5379	2822	2136	5312	4276
110	1555	2984	8065	2485	5294	3628	2653	2246	5377	4833	1639	3687	1598	3146	822	4384	7116	3603	8097	4366	3068	1725	1514	7287	4006	7714	702	2643	750	2605	2139	5446	7290	7489	8179	5034	1008	4710	3082	1864	3156	8045	2598	4984	5394	2937	2192	5333	4301
111	1570	3116	8121	2464	5076	4312	2333	2301	5449	4514	2036	3974	1688	3251	1001	4259	6433	3473	8361	4507	3064	1820	1526	7263	4031	8316	876	2818	696	2650	2201	5458	7255	7358	8224	4821	1190	4636	3095	1508	2926	7905	2576	4777	5494	2864	2081	5167	4103
112	1618	2991	8092	2515	5267	3753	2418	2020	5555	4500	1661	3847	1513	3028	956	4132	7293	3558	8370	4474	3274	1684	1269	7365	3997	7964	943	2570	1067	2554	2306	5660	7687	7313	8143	5020	1129	4885	3438	1565	3095	7948	2524	4758	5593	2832	1857	4964	4313
113	1422	3117	8192	2846	4941	3712	2404	2203	5480	4527	1823	3911	1668	3226	847	4202	6471	3550	7876	4575	3277	1877	1535	7719	4257	7908	913	2872	965	2543	2253	5688	7322	7523	8024	5183	976	4801	3121	1429	3074	8209	2504	5264	5376	2807	2120	5084	4069
114	1421	2957	8023	2620	5065	3648	2366	2113	5421	4528	1668	3676	1665	3166	1063	4134	7219	3476	8162	4605	3152	1650	1521	7458	4186	7716	830	2623	875	2561	2295	5531	7635	7083	8167	5032	1207	4684	3430	1583	2940	8184	2663	4728	5269	2858	2096	5526	4232
115	1646	3222	7608	2473	4587	3528	2517	2428	5370	4423	1673	3792	1496	3248	889	4425	7002	3607	8486	4980	2899	1847	1566	7194	4222	7805	858	2557	864	2440	2201	5761	7529	7464	8122	4784	1089	4606	3156	1752	3141	8068	2728	4997	5413	2664	2095	5450	4311
116	1501	3066	8202	2825	5351	3700	2620	2284	5773	4362	1842	3870	1555	3020	863	4263	7232	3662	8131	4476	3012	1808	1435	7046	4144	7776	988	2778	800	2407	2137	5410	7641	7414	8251	5073	1081	4780	3024	1577	3164	8223	2581	4871	5310	2961	2102	4993	4284
117	1468	3000	7923	2659	4372	3512	2299	2280	5481	4594	1603	3664	1479	3049	836	4410	6904	3508	8008	5351	3036	1769	1912	7631	4288	7765	693	2714	807	2419	2326	5441	7513	6982	8094	5086	1101	4993	3239	1381	3180	7878	2557	4784	5351	2823	1791	5264	4100
118	1554	3047	7817	2569	5238	3660	2406	2137	5614	4418	1869	3745	1460	3330	820	4211	7186	3589	8528	4236	2994	1927	1360	7263	4340	7801	908	2810	974	2786	2323	5574	7391	7379	7971	4996	954	4435	3108	1654	3236	8229	2659	4939	5604	3137	2275	5383	4269
119	1562	3037	8144	2767	5304	3682	2668	2198	5429	4719	1693	3887	1627	3172	881	4252	7120	3699	8288	4308	3148	1898	1527	6941	4309	7760	722	2790	1002	2408	2318	5749	7457	7142	8508	5094	1174	4728	3315	1687	3234	8164	2513	5130	5736	2862	1910	5303	4055
120	1586	3082	7854	2717	5211	4160	2480	2108	5226	4696	1721	3791	1561	3105	862	4317	6755	3550	7608	4606	3019	1855	1665	7120	4155	7935	883	2929	901	2358	2237	5665	7383	7047	7929	5109	1301	4696	3294	1448	3141	7914	2500	4807	5499	3110	1897	5053	4235
121	1595	2992	8105	2531	5044	3595	2595	2049	5445	4778	1636	3279	1713	3028	1004	4442	7176	3618	8307	4494	3248	1999	1413	7370	3893	7812	879	2574	870	2569	2261	5519	7482	7144	8319	4891	1086	4770	3218	1741	3181	7702	2373	4814	5291	2774	2038	5190	4174
122	1589	2979	7794	2533	4316	4047	2554	2384	5498	4410	1598	3674	1679	3040	1055	4370	7276	3470	8359	4346	3287	1929	1621	7448	4122	7613	730	2656	933	2592	2297	5819	7984	7413	8368	5093	1051	4531	3143	1673	2766	7821	2666	5042	5424	2866	2097	5245	4369
123	1750	3149	7696	2611	5131	4220	2456	2200	5388	4425	1996	3708	1558	3245	872	4346	7274	3701	8141	4463	3239	1818	1554	7550	4299	7532	685	2736	852	2439	2419	5539	7520	7050	7870	4953	1231	4642	3160	1580	2982	7966	2432	4901	5274	2736	2104	5393	4354
124	1488	2878	7881	2592	5283	3604	2524	2019	5332	4481	1697	3700	1573	3250	802	4332	7206	3897	7507	4096	3475	1890	1647	7352	3929	7679	844	2870	817	2622	2450	5568	7325	7202	8071	5381	1214	4618	3313	1615	3254	8028	2577	5015	5650	2995	2074	5138	4158
125	1390	2909	8109	2546	5194	4109	2639	2209	5359	4585	1747	3783	1817	3348	941	4331	7160	3423	7998	4503	3575	1770	1507	6656	4025	7600	752	2824	876	2553	2304	5699	7457	7099	8270	5167	1122	4586	3209	1516	3151	8058	2284	4930	5353	3052	2068	4930	4053
126	1608	2954	7782	2517	5131	4246	2466	2201	5517	4342	1589	3746	1679	2828	835	4164	7106	3338	8036	4313	3571	1838	1444	7283	3884	7713	730	2665	1004	2619	2359	5425	7337	7245	7896	4985	1175	4827	3076	1618	3086	7406	2366	4759	5363	2671	2194	5149	4195
127	1601	2873	8067	2578	5328	3702	2513	2259	5628	4488	1677	3877	1678	3324	1004	4234	7126	3413	8425	5051	3398	1929	1757	7682	4057	7914	966	2794	769	2653	2302	5494	7417	7495	8035	5128	1207	4742	3281	1384	3180	7938	2530	5115	5327	3063	2010	5090	4405
128	1607	2855	8081	2824	4971	3691	2654	2123	5427	4440	1464	3915	1493	3227	943	4398	6943	3368	8369	4607	3577	1848	1392	7408	4347	7967	919	2848	801	2498	2183	5463	7791	7240	8201	5168	1029	4846	3166	1498	3113	7720	2491	4746	5192	2907	2050	5404	4141
129	1571	2879	8199	2544	5021	3486	2797	2190	5390	4530	1648	3833	1712	3285	1011	4337	6933	3487	7876	4238	3388	2066	1395	7103	4079	7958	837	2806	897	2440	2265	5334	7475	7294	8081	5126	1083	4574	3059	1685	3254	8107	2675	4765	5289	2765	2001	5169	4287
130	1472	3085	8198	2494	5298	3752	2435	2371	5307	4684	1591	3854	1571	3171	1057	4318	7415	3661	7872	4259	3225	1899	1792	6593	4005	7762	961	2817	797	2657	2424	5537	7465	7400	8276	4951	1195	4899	3172	1525	3107	7927	2587	4954	5514	2983	1973	5506	4187
131	1384	2838	7830	2536	5058	4058	2443	2091	5242	4420	1596	3743	1554	3091	942	4203	7202	3661	7956	4527	3164	1742	1540	7340	4047	7716	856	2830	983	2408	2297	5336	7374	6960	7963	4758	932	5018	3066	1692	3192	7926	2537	4791	5384	2942	2222	5268	4458
132	1452	2790	7876	2552	4940	4157	2561	2251	5165	4681	1884	3609	1586	2897	1147	4025	6871	3444	7878	5085	3214	1856	1536	7293	3667	7793	834	2775	880	2651	2197	5826	7436	7132	8155	4966	1098	4720	3270	1614	3016	7892	2628	4813	5238	2973	2156	5363	4073
133	1590	2903	7847	2658	4509	3592	2456	2265	5371	4628	1892	3680	1801	3253	923	4271	7229	3743	8263	4160	3273	1843	1393	7455	3724	7860	1002	2898	917	2400	2335	5674	7830	7303	8222	5022	1093	4729	3299	1622	2847	7919	2468	4851	5397	2958	2226	5097	4343
134	1576	2891	7884	2473	5102	3649	2552	2020	5504	4447	1558	3716	1708	2950	932	4099	7193	3174	8292	4480	3222	2018	1533	7339	3922	6672	779	2633	789	2312	2439	5907	7527	7209	8150	5171	1064	4777	3180	1358	3157	8017	2479	4807	5356	2841	2213	5543	4228
135	1447	3018	7964	2659	5400	4066	2565	2295	5582	4563	1578	4021	1542	3078	739	4357	7039	3279	8334	4507	3181	1825	1261	7409	4074	8040	726	2986	697	2401	2322	5686	7606	7336	8015	4941	1123	4774	3287	1762	3164	8016	2556	5055	5243	3079	2029	5508	4252
136	1383	3008	7957	2555	5195	3522	2579	2103	5273	4367	1764	3686	1659	3056	941	4387	7171	3520	8359	4510	3254	1891	1581	7298	4030	7904	917	2933	995	2391	2296	5905	7517	7498	8317	4848	1001	4933	3407	1598	2940	8359	2568	4774	5223	2993	1920	5081	4360
137	1603	2854	8361	2654	5122	3656	2476	2051	5557	4405	1513	3900	1597	2988	895	4132	7244	3347	8185	4166	3113	1870	1554	7382	4117	7553	596	2734	1068	2444	2464	5466	7361	7260	8121	4856	1145	4657	3361	1714	3136	7863	2596	5132	5280	2911	1941	5243	4257
138	1397	3090	8131	2622	5449	4266	2678	2110	5351	4520	1490	3975	1530	3282	888	4205	7233	3595	7898	4301	3175	1893	1502	6884	3971	7960	914	2802	993	2882	2266	5351	7233	7091	8131	4997	1135	4873	3253	1353	3238	8202	2640	4810	5475	2994	2135	5080	4086
139	1424	3161	8025	2574	5210	3615	2821	2052	5141	4648	1798	3826	1669	3188	866	4182	7195	3466	7387	4245	3278	2069	1448	7557	3810	7612	749	2879	935	2479	2253	5667	7490	7205	8001	5033	1129	4698	3379	1706	3247	8501	2605	4967	5422	2960	1974	5170	4065
140	1596	2811	8082	2497	5106	3755	2624	2248	5665	4619	1621	3977	1528	3466	895	4238	7133	3424	7827	4219	3262	1784	1827	7349	3977	7847	943	2731	892	2632	2280	5632	6523	7329	8210	4998	1181	4874	3085	1489	3214	7882	2504	4856	5386	2673	1994	5406	4068
141	1531	2774	8076	2551	5186	3754	2336	2125	5221	4690	1758	4051	1736	2996	998	3983	7145	3535	8549	4388	3146	1870	1496	7040	3978	7547	773	2750	910	2516	2163	5433	7761	7355	8143	5149	1344	4644	3048	1446	3164	8009	2413	4586	5114	2926	2059	5158	4169
142	1722	3218	7882	2659	5020	3319	2398	2255	5303	4475	1642	3521	1451	3080	1010	4253	7380	3433	7927	4258	3160	1699	1741	7294	3802	7892	829	2821	745	2566	2278	5522	7269	7335	8204	5034	1074	4918	3034	1497	3036	8219	2507	5012	5010	2863	2081	5152	4059
143	1644	2879	8163	2629	5129	4057	2465	2305	5290	4591	1758	3570	1538	3066	868	4226	7286	3469	7775	4436	3420	1791	1292	7561	4048	8063	719	2926	818	2543	2261	5527	7610	7366	8162	4898	937	4997	3140	1393	3049	7849	2486	4954	5052	3014	2143	4955	4254
144	1642	2965	8166	2699	5283	4163	2582	2062	5171	4640	1555	3770	1639	3235	939	4178	6695	3558	7957	4403	3540	1963	1287	7624	4156	8004	947	2879	815	2467	2255	5360	7363	7568	8283	4809	1211	4666	3200	1563	3169	7804	2657	4598	5194	2798	1850	5335	4300
145	1395	2948	7900	2651	5213	3652	2489	1996	5119	4583	1618	3999	1612	3250	953	4356	7035	3573	7891	4326	2922	1797	1596	7656	3989	7699	974	2761	879	2366	2025	5616	7497	7232	8262	4860	1180	5005	3168	1562	3175	7708	2514	4767	5064	2922	2058	5146	3978
146	1566	2910	8274	2536	5258	3635	2716	2077	5220	4777	1567	3737	1669	3171	975	4373	7239	3576	8065	4869	3492	1854	1500	7251	3865	7459	771	2755	964	2584	2151	5558	7349	6983	8229	4863	1170	4549	3175	1700	2837	7914	2633	4936	5333	2873	2106	5236	4252
147	1470	2927	7950	2816	5051	3607	2494	2098	5102	4494	1506	3882	1510	3092	863	4324	7110	3281	6883	4264	3084	1796	1635	7422	3911	7759	833	2582	874	2279	2399	5524	7704	7272	8245	5018	1164	5038	3347	1738	3186	7846	2341	5029	5030	2959	2220	5295	4451
148	1482	2980	7734	2551	5120	3799	2585	2246	5243	4383	1740	3556	1568	2945	845	4503	7163	3661	7614	4657	3271	1718	1404	7401	4047	7950	1059	2798	946	2850	2588	5210	6597	7307	8011	4899	902	4877	3096	1658	2976	7558	2258	4688	5026	2837	2205	5121	4343
149	1612	2933	7902	2607	5327	3967	2680	2056	5247	4483	1481	3854	1571	3248	943	4196	7027	3283	7678	5172	3269	1755	1515	7302	3890	7740	850	2804	780	2898	2364	5486	7589	7066	8348	4882	1154	4695	3133	1574	2880	7898	2652	4942	5123	2994	1939	5100	4153
150	1515	3067	8174	2605	5055	3986	2639	1962	5419	4699	1519	3829	1712	3254	885	4646	7048	3309	7907	4414	3237	1669	1478	7453	3876	7670	1004	2825	870	2564	2312	5699	7856	7494	8214	4798	1236	4874	3169	1502	3072	7851	2702	4820	5093	2840	2033	5203	4010
151	1125	2842	8215	2475	4983	3976	2642	2135	5353	4537	1334	3766	1383	2980	955	4207	7156	3825	7973	4412	2951	1840	1564	7636	4015	7879	986	2762	852	2821	2196	5545	6256	7436	8314	4949	1175	4658	3108	1525	3069	7752	2537	4855	5032	2948	1997	5187	4185
152	1504	2854	7994	2198	4928	3693	2652	2072	5473	4795	1416	3841	1741	3185	882	4136	7221	3335	8016	5391	3042	1737	1582	7335	3904	7786	863	2688	840	2940	2254	5590	7361	6989	8103	5088	1191	4768	3267	1423	3109	7886	2584	4949	5035	3009	1886	5260	4244
153	1534	3020	8029	2547	5224	3743	2795	2192	5423	4674	1272	3797	1601	3273	936	4269	7004	3362	8070	4340	3115	1806	1507	7655	4070	7739	867	2847	878	2705	2183	5544	7300	7310	7961	4732	916	4697	3026	1344	3238	7979	2393	5281	5067	2887	2023	5431	4094
154	1592	3121	7934	2654	5079	4090	2407	2201	5579	4502	1776	3931	1515	3401	941	4464	7266	3440	8075	5363	3187	1815	1392	7361	4133	7814	799	2781	958	2689	2107	5625	7708	7558	8188	4860	1066	4760	3141	1475	3282	7829	2607	5005	5006	3006	2141	5263	4080
155	1351	2899	8096	2534	4887	3684	2787	2140	5274	4523	1892	3838	1755	3182	999	4197	6938	3715	8039	4408	3086	1751	1402	7299	4112	7733	1002	2709	865	2546	2152	5845	7663	7196	8020	4849	1251	4594	3185	1576	2967	7348	2478	4924	5114	2653	2087	5367	4264
156	1554	3098	7930	2567	5103	4207	2531	2018	5348	4402	1291	3753	1618	3126	863	4200	6942	3563	8283	4480	3100	1859	1781	7453	4104	7874	640	2705	866	2903	2135	5677	7755	7194	8521	5103	997	4793	3162	1783	2837	7812	2302	5001	5032	2807	2202	5430	4113
157	1391	3063	8036	2752	5121	3666	2609	2184	5323	4824	1431	3763	1558	3103	930	4483	7292	3391	7921	5309	3132	2000	1575	7346	4004	7650	556	2764	1249	2486	2271	5404	7633	7234	8276	4962	1142	4845	3095	1306	3170	8072	2510	3821	4896	2920	2049	5233	4115
158	1628	3013	8134	2696	4885	3921	2554	2274	5360	4529	1438	4002	1560	3314	925	4353	6840	3482	7974	5535	3167	1671	1151	7714	3945	7780	902	2896	959	2565	2138	5559	7613	7171	7868	5074	1099	4705	2971	1778	3200	7831	2509	3819	4990	2720	1984	5158	4125
159	1613	3034	7995	2459	5183	3800	2777	1957	5273	4578	1650	3657	1517	3270	997	4394	7069	3517	8509	4468	3278	1876	1665	7336	3873	7715	906	2619	790	2624	2310	5516	7464	7230	8135	5139	1404	4899	3293	1653	3096	7920	2466	3742	5002	2957	1859	5553	4159
160	1419	2900	8065	2795	5065	3771	2390	2125	5099	4529	1534	3826	1779	3151	943	4441	7019	3677	7843	5147	3311	2200	1791	7418	4313	7593	810	2758	990	2657	2118	5724	6510	7392	8052	4909	1035	4651	3205	1673	3151	8308	2435	3988	4682	2923	2082	5386	4167
161	1643	2800	8158	2531	5227	4126	2669	2209	5223	4508	1353	3863	1449	3267	901	4286	7177	3425	7558	5086	2952	1813	1275	6464	3978	7695	953	2723	895	2729	2419	5396	6714	7218	7951	4961	1129	4890	3246	1720	3248	8029	2541	3816	5011	2703	2160	5248	3987
162	1639	2991	7927	2509	5072	4386	2732	2258	4925	4473	1548	3796	1701	3029	872	4201	7142	3437	7777	4525	3169	1746	1636	7563	3913	7732	903	2640	815	2630	2269	5797	6286	7295	8027	5087	1199	5011	3162	1509	3116	7916	2425	3777	4927	3047	2132	5325	4301
163	1536	2964	7863	2575	5308	3893	2729	2384	4978	4442	1578	3903	1656	3150	839	4397	7267	3927	7705	4296	2911	1808	1673	7182	3845	7779	899	2878	871	2639	2310	5573	7637	7116	8233	4842	1279	4800	3172	1645	2977	7784	2736	3713	5239	3024	2127	5321	3948
164	1612	3008	8072	2749	5482	4185	2488	2253	4615	4460	1466	3593	1684	3135	900	4503	6975	3680	7982	5242	2994	1730	1433	7536	4200	7853	736	2889	900	2597	2307	5310	7354	7436	8373	5005	1013	4672	3437	1328	3112	7994	2536	3691	5588	2700	2086	5254	4213
165	1550	2849	7996	2707	5380	3795	2551	2018	4349	4690	1529	3866	1543	3283	873	4369	7304	3412	7952	4662	3399	1961	1483	7279	4090	7644	886	2658	700	2557	2390	5475	7517	7064	8262	4797	1242	4790	3331	1430	3314	8273	2541	3805	5343	2776	2133	5094	4172
166	1454	2784	7986	2575	5275	3962	2483	2166	4976	4531	1618	3990	1666	3331	869	3843	7144	3559	7811	4310	2990	1957	1550	7531	3973	7821	839	2618	863	2644	2265	5815	7498	7435	8109	5219	1043	4864	3253	1489	2984	8092	2292	3787	5513	2776	1925	5209	4289
167	1474	2932	7944	2303	5084	3679	2289	2107	5264	4422	1411	3936	1608	3113	976	4512	7236	3636	8307	5006	3050	1837	1645	7415	4211	7913	857	2627	987	2690	2276	5833	7456	7455	8019	4783	1020	4490	3327	1510	3046	8203	2573	3800	5445	2504	2026	5539	4358
168	1660	2889	8106	2616	5073	4057	2634	2209	5311	4661	1503	3795	1668	3143	916	4097	7136	3285	8215	4424	3311	1658	1597	7272	3767	7708	846	2769	731	2723	2273	5915	7427	7433	8039	5086	1210	4693	3068	1695	3075	7854	2367	3669	5490	2616	2132	5044	4375
169	1547	2966	7915	2591	5196	3514	2560	2037	5651	4425	1641	3843	1714	3096	913	4278	7167	3419	8002	5054	3029	1948	1735	7536	4137	7824	865	2578	812	2719	2327	5536	7292	7346	8267	4868	1199	4694	3219	1688	3208	8029	2612	3727	5301	2703	2106	5408	3771
170	1536	2989	8149	2641	5125	4056	2431	2129	5097	4530	1453	3551	1628	3081	1112	4488	6941	3572	7864	4251	3010	2349	1534	7097	3888	7770	934	2814	994	2581	2340	5447	6362	7131	8031	4903	1178	4697	2985	1400	2885	8261	2498	3811	5265	2868	2045	5312	4106
171	1413	3098	8128	2756	5224	3510	2358	2017	5381	4433	1794	3879	1462	3095	1046	4319	7405	3667	8094	4340	3302	1964	1489	7259	4086	7620	677	2778	842	2519	2154	5567	7614	7386	8326	5176	1090	4624	3113	1641	3020	7981	2698	3519	5293	2637	2104	5143	4216
172	1432	2935	8383	2651	5338	3697	2580	2322	5351	4725	2295	3878	1763	3151	978	4386	7140	3931	7768	4232	3262	1720	1728	7313	4133	7556	838	2757	930	2808	2327	5519	7367	7043	7999	5018	1155	4893	3213	1602	2986	8228	2572	3721	5129	2834	2005	5225	3988
173	1512	2906	8162	2710	5201	3655	2711	2188	4881	4486	1869	3469	1507	3116	781	4590	7041	3718	7906	4579	3224	1856	1702	7302	3972	7766	715	2636	974	2634	2329	5564	7277	7328	8488	5098	929	4889	3246	1557	2980	8231	2497	3794	5285	2973	2026	5393	4153
174	1359	2805	7946	2545	5053	3571	2393	2167	4902	4561	1917	3925	1750	3151	982	4494	7101	3795	7827	4144	3211	1826	1487	7246	4262	7675	425	2760	870	2705	2191	5509	7261	7186	7971	4842	1048	4834	3332	1610	3056	7871	2601	3989	5183	3164	2035	5388	4132
175	1640	2908	7947	2691	5208	3631	2558	2081	4858	4512	2023	3850	1541	3227	1089	4304	6864	3292	8194	5089	3063	1928	1633	7298	4064	7694	645	2458	837	2642	2189	5667	7681	7309	8297	4954	1076	4571	2949	1591	3304	7879	2376	3678	5075	2756	1939	5169	4264
176	1550	3223	7985	2659	4478	3515	2583	2062	5194	4365	1686	3945	1788	3196	996	4414	7148	3686	8020	5196	3202	1921	1371	7187	4139	7518	815	2874	883	2654	2314	5683	7516	7385	8198	4903	1169	4697	3276	1495	3080	8112	2420	3754	5007	2876	2096	5080	4149
177	1471	2859	8044	2799	5366	3664	2605	2102	5309	4554	1729	3842	1814	3221	819	4220	7092	3812	7969	4548	3265	1841	1305	7203	4335	7772	932	2623	960	2497	2278	5798	7445	7004	8019	4749	1100	4804	3236	1749	3161	7949	2629	3780	4919	2589	1906	5327	4083
178	1445	3158	8156	2490	5345	3683	2498	2343	5335	4779	1962	3659	1587	3209	1071	4460	6674	3288	7265	5259	3528	1690	1578	7377	3937	7675	863	2722	833	2659	2248	5630	7500	7186	8445	5243	1300	4718	3436	1573	3042	8042	2482	3727	5210	3028	2142	5322	4259
179	1617	2828	8223	2258	5111	3800	2508	2181	5510	4376	1664	3891	1681	3146	904	4453	6961	3641	7535	4341	3261	1793	1505	6557	4400	8030	506	2724	856	2625	2359	5607	7463	7092	8448	4775	1168	4688	3238	1656	3117	7882	2375	3654	5156	2951	1979	5288	4162
180	1434	2979	8316	2794	5126	3641	2528	2218	5681	4216	1761	3802	1558	3121	975	4544	6984	3455	7763	4237	3081	1725	1381	7310	3892	8127	681	3073	853	2766	2304	5440	7544	7021	7973	4885	1129	4865	3246	1355	3197	8357	2408	3662	5213	3017	2003	5224	4159
181	1515	2724	7947	2677	5152	3687	2602	2108	5691	4642	1643	3993	1694	3204	774	4295	7194	3715	8063	4339	3189	1919	1670	7373	4056	7455	646	2842	904	2455	2375	5777	7684	7192	8091	4910	1017	4669	3492	1619	3141	7828	2550	3701	4992	3149	1824	5254	4089
182	1523	2835	8261	2738	5215	3695	2532	2146	5519	4342	1586	3542	1728	2853	918	4183	6901	3549	8296	4290	2935	1935	1392	7058	4215	7583	675	2808	788	2634	2262	5359	7569	7236	8293	4898	1093	4820	3079	1622	3052	7901	2601	3759	5020	2826	1948	5455	4176
183	1609	2920	7933	2608	5408	4121	2538	2171	5387	4335	1751	3737	1522	3181	1004	4427	7093	3337	7883	5514	3394	1730	1593	7018	3875	7827	736	2714	964	2611	2278	5476	7750	7068	8373	5057	895	4776	3244	1759	3194	7874	2462	3905	4890	3201	2003	5573	4174
184	1667	3042	8339	2601	5270	3619	2605	2361	5459	4571	1537	4054	1679	3182	742	4448	6977	3559	8103	4307	2937	1799	1399	7333	3990	7740	1026	2666	840	2718	2372	5558	7443	7256	8095	4797	931	4884	3316	1685	3020	7806	2624	3744	5313	2870	1946	5257	3903
185	1551	2991	7994	2602	5062	4154	2638	2252	5235	4433	1620	3707	1523	3305	884	4384	7093	3552	7878	5185	3180	1687	1668	7310	4042	7895	894	2720	953	2529	2266	5612	7692	7300	8108	5008	946	4899	3278	1496	2962	8210	2482	3742	4967	3042	1796	5230	4093
186	1496	3029	8078	2654	5520	3596	2379	2164	5536	4725	1708	3891	1679	3066	820	4372	6969	3375	7899	5332	3028	1724	1563	7139	4182	7739	825	2745	938	2485	2339	5591	7777	7458	8376	5097	953	4882	3281	1609	3205	8015	2394	3687	5001	3257	1776	5416	4089
187	1439	3060	7818	2364	5113	3910	2347	2042	5143	4399	1638	3776	1513	3226	919	4344	7063	3597	8288	4193	3051	1664	1404	7603	4283	7823	541	2606	1066	2845	2192	5455	7541	7187	8145	5145	1174	4711	3347	1470	2918	8252	2320	3737	5253	3000	1903	5407	4122
188	1544	2980	7968	2748	5083	3685	2647	2097	5324	4646	1638	3800	1721	2997	983	4394	7009	3558	8417	4420	3369	2097	1398	7509	4178	7734	803	2718	912	2713	2318	5588	7573	7109	8233	5099	1144	4767	3063	1547	3022	7822	2477	3776	5537	2973	1981	5288	4221
189	1593	2751	7853	2449	5286	3824	2659	2105	5341	4692	1424	4005	1614	3221	747	4500	7187	3664	8101	4227	3273	1710	1408	7267	3944	7664	973	2752	990	2413	2166	5710	7743	7165	8190	4998	1041	4872	3279	1632	3144	7966	2472	3706	5074	3026	1906	5499	3860
190	1633	3021	8048	2547	5172	3793	2625	1975	5149	4609	1555	3713	1775	2994	981	4276	7126	3726	8031	4300	3104	1826	1491	7164	3919	7671	902	2696	811	2778	2392	5682	7581	7243	8410	5011	1121	4720	3170	1386	3215	8063	2428	3944	4938	3039	2075	5025	4305
191	1642	2948	8262	2661	5095	3724	2699	2208	5847	4193	1462	3839	1631	3235	926	4462	6903	3284	7889	4204	3282	1994	1581	6427	4056	7817	885	2598	921	2639	2215	5655	7472	7202	7758	5169	1106	4834	3067	1464	2958	7795	2513	3642	4758	3032	2036	5292	4270
192	1553	2847	8045	2609	4998	3534	2437	2045	5022	4552	1581	3962	1649	3087	789	4340	6965	3634	7872	4595	3139	1894	1543	7382	4057	8090	669	2626	817	2727	2159	5676	7662	6955	8284	5013	1180	4866	3282	1623	3096	8011	2721	3768	5282	2976	1961	5212	4208
193	1580	2832	8092	2745	5140	3893	2720	2036	5187	4444	1561	3760	1607	3360	997	4414	6820	3634	8141	5143	3221	1882	1483	7335	4172	7969	940	2779	818	2691	1979	5486	7201	7506	8107	5028	1003	4659	3010	1644	3028	8268	2200	3680	5456	2893	1711	5060	4128
194	1292	3021	8056	2538	5349	3706	2580	2172	5188	4429	1634	3564	1462	3131	1026	4583	6876	3480	7818	5113	3102	1570	1475	7195	4047	7489	913	2707	820	2661	2275	5453	7657	7168	8260	5130	1232	4704	2934	1698	3129	7686	2541	4574	5005	3103	2029	5245	4185
195	1536	2816	8118	2750	5049	3811	2654	1963	5269	4476	1511	3730	1805	3196	921	4369	7140	3523	8105	5199	3234	2082	1722	7274	4058	7420	788	2931	956	2908	2072	5296	7729	7777	8361	4962	1136	4713	3146	1562	3183	7931	2440	3710	5354	2987	1973	5394	4147
196	1616	2911	8247	2395	5223	3899	2603	2209	5700	4468	1442	3678	1637	3318	980	4243	7092	3496	8041	4177	3288	1797	1523	7451	4141	7325	854	2797	962	2544	2119	5459	7602	7171	8007	4946	1105	4779	3214	1561	3102	8033	2576	3605	5223	3040	1916	5088	4375
197	1548	3047	8338	2465	4920	3740	2559	2195	5475	4523	1713	3576	1776	3356	1009	4380	6849	3644	8103	5048	3088	1605	1658	6662	4067	7661	815	2714	904	2604	2292	5527	7665	7230	7946	5077	1157	4784	3228	1589	2913	8007	2345	3734	5335	3012	1783	5167	4190
198	1685	2811	8005	2558	5199	3858	2523	1924	5335	4506	1697	3835	1653	3075	1028	4113	6706	3274	8022	4825	3410	1655	1444	7244	3839	7796	817	2909	931	2774	2330	5414	7607	6934	8201	5001	1091	4762	3259	1705	3098	8092	2494	3784	5401	3162	1886	5517	4319
199	1593	2845	7905	2567	5170	3801	2682	2072	5337	4394	1438	3667	1602	3170	982	4400	7166	3295	8107	5226	2967	1760	1366	6530	4115	7964	906	2773	1145	2647	2385	5575	7454	7289	8034	4864	1057	4581	3239	1607	3160	7884	2499	3723	5283	2720	2119	5130	4211
200	1525	2805	8212	2548	5004	3629	2348	2109	5310	4616	1829	4047	1700	3183	958	4285	7341	3558	7891	5305	3203	1992	1515	6808	4111	7832	1001	2851	983	2628	2284	5749	7685	7259	8030	4931	1168	5016	3189	1374	3012	7937	2510	3737	4732	2861	2102	5342	4198
201	1549	3080	8152	2604	5092	3782	2811	2139	5541	4459	1401	3677	1592	3279	1006	4349	7109	3743	7903	5090	2989	1422	1492	6715	3872	7935	718	2718	1012	2805	2346	5651	7388	7070	8074	4869	1239	4788	3207	1525	3198	7910	2483	3538	5271	2856	2023	5321	4425
202	1604	2743	8480	2634	5112	3656	2736	2245	5334	4526	1507	3859	1444	3128	863	4282	6977	3477	7789	4969	3087	1399	1886	7187	3949	7569	884	3048	923	2653	2396	5523	7240	7095	8177	5029	964	4744	3173	1534	3126	8077	2499	3816	5292	3050	2092	5509	4142
203	1458	2826	7989	2461	5191	3812	2714	2270	5562	4661	1460	3960	1681	3311	950	4708	7175	3347	8029	5293	3274	2242	1614	7369	4217	7753	703	2828	920	2744	2216	5601	7608	6984	8182	5024	1110	4874	3170	1509	3102	7777	2339	3746	5279	2937	1912	5589	4193
204	1509	2997	8287	2599	4883	3624	2562	2006	5465	4565	1372	3789	1615	3162	889	4226	7161	3312	7236	5107	3170	1817	1782	7394	4057	7660	936	2367	757	2727	2239	5374	7573	7157	8371	4587	984	4780	3064	1595	3020	8101	2411	3753	5546	3069	1971	5320	4204
205	1475	3052	8056	2532	5081	3577	2584	2132	5381	4439	1501	3794	1559	3201	962	4420	7213	3462	7165	5299	3395	1702	1647	7478	3988	7384	915	2648	912	2687	2127	5644	7353	7081	7925	5008	1119	4832	3313	1711	3275	8006	2387	3603	5394	3106	1902	5453	4307
206	1674	2869	7997	2599	5300	3744	2525	2328	5213	4673	1637	3607	1621	3365	956	4216	7151	3453	7357	4975	2864	1913	1619	7322	4143	7539	743	2702	753	2642	2233	5597	7801	7212	7994	4976	1194	4829	3035	1665	2899	7917	2654	3543	5089	3072	2024	5199	4102
207	1456	2917	7819	2391	4988	3710	2686	2093	4927	4551	1576	3661	1702	2901	734	4281	7060	3458	7716	5141	3130	2095	1484	7060	3855	7883	868	2897	803	2864	2148	5795	7545	7254	8040	5155	1274	4798	3186	1576	2962	8173	2148	3608	5278	2905	1774	4932	4174
208	1580	2836	8078	2536	5151	3622	2697	2137	5480	4467	1690	3784	1630	3236	880	4420	6938	3668	8006	5248	3123	1818	1388	7025	3833	7785	923	2712	908	2787	2375	5541	7479	7108	8166	5076	1156	4610	3157	1606	3051	8168	2310	3816	5133	2961	1919	5211	4426
209	1485	3008	8226	2659	5068	3487	2552	2046	5319	4578	1514	3819	1601	3259	914	4229	7222	3684	8202	5014	3028	1682	1724	7387	4023	7927	760	2764	852	2628	2311	5586	7393	7085	8437	5075	1067	4728	3278	1471	2917	8041	2395	3839	5407	2943	1857	5425	3937
210	1717	3036	8278	2664	5206	3770	2663	1987	5499	4531	1855	3906	1566	3556	1020	4409	7006	3458	8019	5402	3223	2023	1595	7183	4058	7875	1043	3113	925	2708	2262	5494	7280	7288	8141	4861	1024	4745	3358	1582	3033	7989	2592	3873	5058	2921	1890	5290	4478
211	1624	3014	7940	2475	5057	3673	2490	2175	5344	4365	1627	3739	1514	3047	919	4431	7004	3301	8000	4396	3142	1696	1585	7380	3974	7633	851	2752	774	2705	2207	5361	7392	7436	8033	5059	1114	4912	3355	1439	2964	7885	2580	3660	5095	2997	1954	5473	4367
212	1560	2917	7980	2409	5234	3414	2649	2154	5302	4367	1537	3756	1603	3215	957	4430	6886	3534	7902	4270	3061	1605	1482	7020	4023	7995	836	2327	872	2745	2324	5536	7522	6862	8222	4955	921	4640	3163	1566	3069	8107	2496	5092	5185	2925	1921	5470	4213
213	1706	3055	8124	2570	5127	4064	2485	2208	4910	4604	1671	3788	1354	3193	958	4286	7154	3385	7777	5275	3063	1697	1427	7219	4129	7790	552	2603	923	2811	2338	5608	7470	7048	8036	4760	1065	4837	3107	1630	3200	7949	2422	3690	5144	2683	1867	5199	4262
214	1566	2844	7901	2392	5149	3736	2576	2164	4922	4535	1563	3746	1701	2985	947	4652	7288	3383	7690	5055	3107	1749	1694	7263	4132	7677	873	2914	894	2554	2321	5474	7653	7305	8223	5010	969	4687	3051	1569	3111	7955	2502	3630	4931	3047	1974	5326	4283
215	1556	3121	7679	2431	5225	3800	2742	2078	4777	4434	1463	3752	1685	3194	929	4504	6961	3443	7945	5254	3278	1731	1605	7419	4266	8019	884	2840	1025	2840	2084	5662	7696	6922	7783	5075	1151	4681	3061	1715	2888	7994	2150	3871	5029	3027	1904	5393	4207
216	1525	2792	7973	2625	4913	3538	2404	2107	4714	4338	1405	3786	1474	3459	727	4357	7272	3331	8064	5079	3297	1781	1327	7035	4188	7821	887	2727	1213	2506	2242	5598	7649	7368	8028	4924	1210	4681	3113	1593	3280	8263	2412	3604	4883	2858	1967	5389	4342
217	1409	2908	8008	2372	5148	3659	2591	2027	4673	4660	1527	3853	1594	3187	1017	4341	6763	3300	8298	5113	3088	2010	1473	7225	4295	8248	811	2707	856	2750	2360	5797	7569	7542	8068	5026	1075	4721	3282	1662	3033	7884	2239	3847	4805	2979	1800	5280	4368
218	1789	2806	8193	2420	5247	3479	2436	2302	5111	4448	1556	3848	1826	3255	948	4231	7176	3334	7964	5015	3443	1741	1762	6983	4170	7724	748	2710	768	2945	2051	5503	7637	7021	8139	4811	1088	4804	3196	1616	3072	8058	2513	3549	4773	2936	1892	5339	4403
219	1565	3038	7937	2542	5167	3843	2584	2251	4953	4553	1785	3707	1533	3108	1118	4186	7015	3292	8221	5195	3131	1768	1806	7330	4022	8028	692	2717	971	2807	2311	5641	6624	7199	8274	4784	1244	4407	3290	1635	3181	8007	2377	4030	4945	3128	1829	5151	4390
220	1611	3044	7963	2560	5443	3812	2664	1876	5088	4608	1595	3840	1648	3379	904	4435	7280	3517	7561	4467	2987	1701	1376	7225	4190	7823	921	2929	1041	2905	2525	5480	6970	7298	8360	4924	1226	4586	3421	1331	3020	8335	2454	4000	4614	3011	2070	5515	4142
221	1513	2902	8331	2580	5083	3973	2660	2309	5543	4629	1518	3822	1456	3322	966	4216	7196	3529	7341	5091	3045	1639	1532	7080	4221	8169	735	2756	855	2434	2281	5534	7503	7244	8223	4920	1132	4747	3247	1761	3147	8188	2392	3672	4709	3192	1761	5409	4115
222	1399	2814	8056	2442	5235	3729	2315	2230	5757	4652	1373	3778	1587	3241	989	4387	7006	3604	7127	5219	3292	1663	1542	7251	4129	7745	975	2711	838	2922	2308	5378	7445	7340	8169	5090	1145	4584	3258	1731	3114	7873	2435	3726	5452	2917	1835	5616	4258
223	1532	2834	8067	2662	5418	3975	2500	2240	5679	4273	1440	3714	1637	3155	926	4163	7075	3239	7707	5433	3141	2098	1355	7023	4059	8081	944	2946	857	2860	2202	5724	7580	7074	8385	4790	971	4856	3063	1524	3052	8127	2491	3740	5114	2849	1881	5328	4424
224	1383	2825	8070	2533	5346	3664	2540	2186	5241	4564	1421	3773	1477	3156	862	4516	6996	3507	7894	5377	3107	2009	1607	7540	4102	7881	1003	3006	891	2634	2250	5284	7542	7151	8070	5041	991	4553	3256	1633	3184	7529	2531	3512	5257	3086	1799	4988	4289
225	1586	3032	8164	2547	5088	3777	2227	2188	5204	4564	1433	3970	1767	3347	871	4223	7007	3282	7894	5115	3141	1688	1515	7242	4067	7637	939	2615	789	2646	2191	5477	7475	7279	8268	5417	1138	5003	3202	1411	2892	7915	2491	3712	5047	3129	1979	5148	4242
226	1606	2860	7723	2525	5317	3441	2570	2137	5498	4433	1455	3794	1556	3194	871	4193	7451	3325	7846	5096	3188	2057	1612	7218	4028	7908	572	2786	913	2734	2208	5494	7896	7159	8069	4891	1125	4525	3208	1637	3259	7773	2533	3651	5192	3065	1925	5249	4175
227	1560	2849	7998	2550	5313	4176	2579	2361	5361	4471	1360	3261	1376	3282	937	4226	6999	3730	7688	5341	3344	2117	1735	7357	4116	7823	863	2802	907	2668	2266	5341	7760	7181	8305	5157	1037	4613	3233	1581	3030	7881	2753	5033	5321	2882	1817	5495	4105
228	1535	3024	7846	2802	5252	3831	2583	2110	5191	4524	1382	3904	1620	3035	899	4371	7028	3872	7720	5138	3054	1785	1394	7233	4098	7788	926	2867	1005	2559	2257	5521	7369	7513	8097	5102	955	4575	3075	1754	3046	7998	2529	3676	5326	3158	1873	5273	4298
229	1661	2973	7881	2569	5244	3556	2376	2077	5457	4387	1712	3967	1631	2893	962	4515	6987	3667	7841	5082	3166	1782	1549	7153	4435	7860	826	2602	951	2658	2130	5413	7503	6855	8024	4875	1079	4794	3095	1781	2942	8070	2521	3824	5231	3000	1933	5576	4367
230	1668	2780	8110	2462	5100	3583	2306	1968	5310	4377	1358	3896	1525	3122	901	4277	7063	3358	8005	5402	3192	1663	1824	7247	4107	7683	797	2544	983	2832	2339	5516	7590	7293	8465	4878	1149	4725	3256	1507	3090	8018	2634	3907	4968	3024	1951	5198	4215
231	1367	2843	8267	2571	5295	3695	2247	2235	5353	4510	1333	3773	1333	3155	1015	4161	7162	3725	7790	5147	3234	1587	1613	6521	3891	7743	945	2727	834	2684	2267	5360	7421	7341	8022	4818	1148	4470	3064	1623	2824	7891	2440	3626	5018	2940	1762	5389	4346
232	1618	2912	8262	2560	5198	3891	2251	2080	5438	4685	1485	3640	1543	3168	824	4506	7055	3527	7665	5118	3097	1850	1222	7366	4136	7814	948	2940	962	2637	2407	5477	7643	7404	8359	4963	1349	4726	3519	1547	3153	8197	2581	3654	5500	2821	1883	5173	4237
233	1525	2822	7995	2329	5160	3858	2387	1957	5438	4706	1617	3850	1672	3094	1039	4580	7159	3343	7891	5284	3141	1582	1406	7422	4040	7973	633	2738	1043	2578	2296	5549	7027	7178	8149	5033	1058	4787	3302	1795	2985	8381	2457	3733	5621	2978	1805	5262	4157
234	1609	2843	8014	2572	5299	3898	2369	1958	5274	4540	1488	3546	1615	3273	841	4389	7326	3746	7739	5064	3184	2238	1572	7391	4150	7912	867	2670	958	2724	2190	5579	7742	7368	8418	5040	925	4544	3212	1631	3022	8144	2550	5422	5266	3067	1912	5337	4343
235	1508	2824	7859	2314	4897	3717	2434	2132	5191	4443	1565	3697	1586	2810	993	4328	7098	3648	7736	4980	3108	1413	1699	6959	3991	7475	792	2699	839	2628	2319	5454	7544	6962	8321	4841	1289	4510	3173	1633	3033	8176	2621	3662	5186	3339	2084	5353	4270
236	1612	2903	8168	2620	5206	3601	2423	2243	5611	4571	1376	3738	1671	3207	1062	4166	6923	3658	7298	4869	3220	2261	1706	7401	3930	7671	663	2953	771	2730	2173	5441	7250	6947	7984	5168	1176	4561	3261	1521	3191	8085	2442	3873	5497	3201	1867	5355	4254
237	1472	3012	8103	2565	5050	3739	2284	2030	5195	4475	1717	3728	1628	3098	1015	4180	7146	3472	7149	5348	3194	1296	1516	7467	4186	7720	986	2806	856	2498	2227	5436	7377	7085	8377	4924	1018	4556	3226	1746	3017	7925	2520	3690	5034	2937	1811	5391	4325
238	1502	2923	7874	2584	5135	3727	2678	2043	5431	4522	1460	3890	997	2979	825	4316	7248	3410	7453	5119	3325	1980	1733	6656	4175	7702	860	2818	1048	2664	2491	5485	7752	7087	8020	4985	1047	4886	3134	1568	3214	7870	2536	3777	4975	2898	1776	5303	4033
239	1586	2948	8255	2525	5212	3845	2152	1900	5710	4378	1524	4070	1684	2949	942	4075	7250	3625	7514	5259	3079	1845	1636	7551	4106	8084	931	2751	855	2688	2067	5596	6781	7440	8341	5055	1114	4562	3234	1591	3115	8107	2569	3738	4994	3006	1921	5459	4157
240	1369	2932	8205	2544	5092	3650	2644	2112	5359	4351	1548	3900	1558	3081	815	4272	7074	3727	7615	5135	3258	1947	1537	7128	4092	7952	856	2681	915	2501	2208	5897	7587	7022	8120	5114	1110	4706	3186	1577	3192	8101	2296	5312	5304	2829	1876	5455	4302
241	1636	2944	7997	2572	5272	3725	2718	2075	5420	4447	1753	3896	1436	2991	799	4193	7178	3358	7915	5339	3273	1606	1673	7339	3961	7839	710	2887	1087	2621	2419	5500	7573	7275	8268	4681	1184	4749	2956	1702	3159	8107	2704	3742	4971	3063	1948	5538	4183
242	1653	2980	8044	2365	5220	3560	2406	2044	5425	4424	1417	3967	1470	3235	873	4373	7271	3525	7597	5130	3131	1938	1349	6615	4353	8087	946	2617	867	2824	2171	5632	7355	7333	8113	5086	1018	4506	3206	1353	3167	7711	2616	3869	5229	2920	1865	5274	4219
243	1489	3029	7990	2512	5169	3675	2368	2315	5158	4520	1556	3912	1369	3107	960	4427	7113	3777	7864	5108	2981	1597	1817	7588	3997	7585	694	2670	781	2773	2385	5340	7579	7363	8035	5046	1099	4930	3204	1444	3034	8167	2496	3840	5048	2868	1836	5585	4115
244	1672	3173	8011	2358	5042	3950	2628	2050	5287	4484	1402	3755	1628	3164	977	4210	6824	3664	7892	5287	3130	1895	1387	7629	4249	7828	1001	2683	865	2636	2206	5615	7577	7083	8211	5329	1067	4695	3286	1582	3092	7989	2598	3545	4936	2907	1816	5380	4354
245	1577	2890	8042	2650	5125	3862	2404	2228	5352	4600	1734	3797	1611	2829	961	4234	7129	3820	8171	5340	3449	1790	1573	7630	4127	8075	787	2781	909	2790	2537	5478	7423	7098	8334	5023	1154	4801	3342	1587	3072	8149	2505	3663	5201	3057	1906	5636	4086
246	1493	2814	8185	2502	5416	3867	2749	2105	5492	4654	1398	3717	1610	2759	873	4409	7160	3701	7661	4880	3334	1773	1460	7719	4130	7729	730	2780	1003	2576	2238	5462	7764	7337	8426	4935	1292	4842	3267	1690	3115	8090	2591	3645	5178	2928	1773	5279	4292
247	1149	3019	7883	2443	5147	3727	2551	2099	5431	4285	1614	3646	1569	3131	930	4289	7202	3476	7864	5170	3215	1951	1647	7464	4163	7880	841	2720	729	2746	2233	5458	7557	7253	8311	5009	901	4659	3269	1578	3091	8241	2469	3872	5079	2932	1746	5155	4428
248	1434	2919	8146	2313	5147	3563	2721	2083	5170	4527	1454	3838	1589	3302	752	4225	6998	3591	8030	5178	3409	1681	1811	7181	4062	7781	814	2885	780	2484	2143	5658	6927	7523	8158	4864	802	4768	3190	1537	2992	8271	2287	3919	5016	2948	1747	5408	4253
249	1594	3045	7994	2500	5365	3596	2546	2083	5440	4522	1347	3966	1628	3118	960	3986	7083	3466	7652	4132	2916	1738	1461	7547	3981	7602	904	2811	835	2698	2207	5368	7473	7212	8379	4914	868	4764	3159	1699	3041	7994	2765	5373	4969	2881	1912	5176	4468
250	1544	2943	7643	2479	4981	3639	2366	2027	5255	4345	1376	3741	1607	3200	958	4447	7063	3583	7682	5153	3135	1812	1425	7627	4242	7714	850	2822	919	2794	2016	5666	7612	7417	8262	5113	1057	4554	3453	1571	3113	8235	2620	3798	4858	2896	1927	5437	4126
251	1428	2685	8068	2836	5029	3545	2468	2229	5331	4262	1479	3898	1674	3170	1046	4238	7033	3577	7868	5099	3069	2099	1844	7331	4139	8043	983	2788	862	2866	2255	5559	7684	7300	8086	4765	1152	4866	3322	1518	2933	8137	2489	3893	5140	3091	1848	5299	4362
252	1610	2676	8357	2370	5066	3727	2552	2038	5390	4395	1652	3848	1595	3176	964	4361	7120	3781	7817	5049	3020	1759	1353	7560	4084	7819	893	2745	851	2891	2418	5611	7744	7461	8189	5049	1167	4628	3087	1500	2922	7824	2579	3811	5055	2896	1918	5337	4270
253	1471	3008	7881	2545	4987	3777	2595	2085	5203	4424	1860	3973	1647	3176	1015	4352	7085	3755	7794	5078	3097	1677	1514	7262	4077	7605	583	2822	874	2851	2188	5378	7561	6717	8108	5056	1185	4743	3198	1675	3131	7985	2447	3719	4800	2898	1972	5556	4243
254	1561	3018	8081	2451	5342	3738	2589	2207	5223	4652	1690	3902	1422	3065	697	4329	7126	3544	7689	4903	3178	1706	1756	7485	4232	7738	663	2925	977	2716	2244	5535	7606	7188	8473	5076	1293	4759	3203	1573	2878	8119	2488	3525	4947	2888	1902	4805	4161
255	1586	3067	7929	2523	5145	3558	2441	2084	5359	4580	1920	3330	1520	2925	889	4008	6961	3586	7870	5126	3067	1657	1619	6820	4043	7772	725	2757	950	2607	2355	5406	6916	7238	8250	5100	1130	4941	3372	1609	2725	7834	2491	3692	5134	3067	1803	5296	4431
256	1673	2984	8270	2562	5183	3948	2404	2048	5289	4726	1867	3797	1690	2979	941	4434	7104	3560	7484	5204	3087	1799	1585	7648	4093	7888	770	2862	942	2833	2236	5251	7446	6866	8085	4842	1081	4600	3050	1727	3029	8092	2692	5275	5033	2893	1842	5346	4425
257	1355	2862	8204	2580	5045	3755	2537	2146	5394	4528	2016	3808	1594	3007	818	4398	7022	3818	7954	5136	3247	1639	1371	7655	4220	7802	949	2877	944	2808	2700	5833	6843	7564	8521	4974	1148	4824	3182	1766	3052	8282	2530	3812	4876	2814	1905	5326	4308
258	1488	2981	7903	2273	5041	3803	2502	2180	5193	4581	1773	3800	1354	3225	993	4296	6841	3620	7933	5235	3348	2157	1741	7666	3955	7899	724	2976	794	2673	2287	5551	7424	7169	8275	5002	796	4631	3307	1380	3061	7754	2417	3786	4760	2989	1900	5515	4355
259	1477	3121	7891	2568	4863	3962	2582	2227	5502	4353	1578	3658	1551	2952	899	4178	7192	3865	7062	5203	3153	1607	1721	6649	3846	7772	620	2686	915	2484	2148	5328	6709	7264	8126	5066	1049	4765	3341	1412	3162	8242	2612	3689	5067	2712	1751	5394	4265
260	1619	3073	7947	2476	4928	3673	2588	2065	5641	4511	1652	3763	1638	3088	856	4234	7096	3643	7187	5172	3117	1778	1816	7475	4127	8016	860	2770	864	2742	2378	5261	7537	7412	8019	5002	1061	4619	3176	1582	3174	7983	2506	3672	4906	3166	1878	5688	4329
261	1421	2861	8006	2660	5161	3887	2635	2081	5509	4399	1985	3693	1525	3116	810	4150	7233	3662	7552	5078	3125	1665	1500	7195	4156	7570	787	2875	894	2602	2307	5514	7469	7220	8509	5072	1048	4680	3190	1588	3084	7975	2315	3935	5339	2996	1817	5410	4134
262	1619	2920	8042	2613	5023	3867	2448	2060	5333	4491	1810	3528	1648	3202	864	4145	7195	3631	8058	5131	3296	1899	1629	7493	4217	7843	955	2713	975	2772	2179	5482	7424	7052	8287	4804	1018	4538	3389	1548	3145	8393	2548	5525	5464	3047	2019	5294	4256
263	1692	2905	7681	2651	5141	3867	2492	2154	5248	4513	1785	3969	1881	3104	987	4159	7217	3659	7914	5190	3203	1892	1882	7266	4171	7818	621	2946	1203	2744	2323	5560	7222	7202	7985	4980	1052	4618	3364	1495	3073	7974	2359	3817	5346	2820	1946	5247	4215
264	1438	2899	7985	2506	5247	3850	2530	2107	5442	4574	1802	3787	1618	3140	826	4383	7194	3784	7720	4923	3152	1858	1694	7612	3948	7670	636	2697	883	2778	2320	5409	7002	7067	8335	5162	1262	4710	3352	1586	3189	7932	2478	3777	4647	3008	1826	5300	4281
265	1536	2809	7786	2441	5076	3908	2600	2067	5061	4622	1790	4134	1733	2967	909	4259	7054	3658	7803	5268	3170	2008	1699	7751	4158	7738	951	2269	716	2734	2270	5560	6698	7421	8280	4978	1082	4598	3189	1559	3165	8165	2616	3782	5147	3017	1795	5069	4130
266	1491	2911	8302	2347	5306	4012	2443	2229	5501	4480	1794	3690	1713	3025	1113	4336	7272	3423	7933	5137	3322	1943	1672	7424	4040	7874	850	2884	790	2728	2279	5449	7502	6667	8159	5042	1085	4702	3188	1687	3094	8064	2454	3548	5216	2939	1898	5213	4108
267	1437	2985	7917	2479	4900	3848	2613	2028	5608	4333	1920	4096	1490	3082	1000	4057	7152	3837	8078	5290	3102	1758	1674	7678	4121	7701	847	2811	1026	2845	2187	5611	7552	7392	8283	5316	1103	4798	3232	1544	3071	7678	2516	3660	5400	3082	1818	4960	4499
268	1412	2960	8050	2427	5029	3760	2357	1975	5344	4458	2247	3858	1513	3066	989	4319	7320	3441	7743	5321	3277	2036	1360	7377	4366	7729	990	2743	948	2864	2087	5719	7660	7262	7968	4996	1353	4527	3374	1587	3038	8078	2445	3919	5350	2898	1893	5340	4381
269	1465	3107	7705	2462	4799	3708	2447	2106	5295	4426	1962	3993	1578	2887	857	4028	7242	3790	7497	5157	3154	1784	1843	7578	4272	7851	1016	2538	938	2797	2159	5615	7500	7248	8117	4979	1218	4681	3299	1504	3183	7974	2434	3862	5175	2978	1883	5166	4211
270	1371	3015	8293	2632	5147	3861	2508	2108	5264	4525	2044	3875	1710	3075	1138	4187	7123	3722	7302	5118	3063	1774	1604	7822	4078	8048	960	2824	927	2563	2307	5420	7244	6959	8011	5206	1232	4919	3158	1757	2944	8133	2526	3768	5366	3046	2184	5359	4616
271	1689	3154	8027	2447	5063	3529	2581	1892	5452	4626	2117	4103	1569	3132	896	4197	7091	3615	7288	5057	3204	1811	1703	7353	4171	7792	952	2854	949	2566	2302	5498	7518	7292	8166	5012	1087	4467	3210	1438	3010	7953	2347	3664	5190	3028	2085	5362	4128
272	1574	3011	8237	2641	5218	3773	2589	2047	5270	4664	2189	4156	1765	2983	1047	4149	7061	3785	7548	5395	2948	1992	1560	8035	4374	7555	889	2682	854	2700	2201	5483	7626	7229	8188	4979	1158	4512	3210	1622	2885	8301	2263	3794	5254	3020	2174	5378	4077
273	1613	2964	7985	2575	4985	3882	2579	2087	5151	4442	2273	4167	1564	3101	1112	4188	7189	3180	7652	5190	3135	1984	1552	7251	3937	7785	887	2726	769	2523	2269	5311	7479	7211	8204	4981	1131	4669	3413	1600	3210	8319	2368	3982	5267	3273	2127	5458	4360
274	1455	2943	8149	2607	5074	3813	2791	2113	5586	4441	2217	3874	1471	3110	932	4218	7014	3683	7591	5308	3186	2148	1485	7533	4174	7638	887	2630	982	2559	2078	5606	6884	7290	8337	4894	1264	4853	3394	1603	2945	8118	2231	3715	5231	2938	2167	5576	4252
275	1517	3049	7869	2438	5211	3798	2319	2074	5222	4557	2343	3719	1662	3107	1034	4270	7272	3580	7677	5542	2894	1857	1614	7528	4140	7716	817	2842	773	2537	2210	5212	7475	7014	7962	5006	1209	4779	3147	1632	2993	8281	2501	4613	5270	3104	2164	5770	4411
276	1637	2842	8085	2393	4950	3791	2494	2099	5326	4568	2041	3787	1575	3066	1092	4220	6963	3637	7964	5291	3275	1724	1466	7521	3920	7727	727	2253	803	2440	2365	5306	7434	7264	8023	4952	1178	4623	3369	1669	3032	8104	2495	3934	5320	3067	2228	5172	4475
277	1448	2885	8137	2709	5025	3813	2528	2170	5304	4740	2151	3921	1710	3044	934	4246	7241	3802	7291	5330	2929	1838	1711	7741	4403	7956	708	2588	933	2623	2457	5459	7357	7374	8172	5116	1196	4440	3274	1486	3100	8251	2501	3775	5433	2763	2215	5300	4135
278	1435	2966	7942	2600	5051	3765	2479	2242	5426	4146	2133	3828	1750	3028	919	4249	7197	3664	7509	5486	2917	1759	1618	7298	4199	7991	767	2737	939	2577	2112	5449	6734	6956	8330	5200	949	4748	3160	1622	2975	8159	2522	3863	5374	2847	2076	5344	4589
279	1509	2967	7954	2407	5031	3500	2439	1988	5267	4650	2243	3882	1482	3169	843	4233	7444	3646	7631	5327	2922	1770	1613	7602	4245	7799	902	2661	955	2597	2134	5425	7330	7203	8114	5052	1139	4482	3146	1590	3195	8131	2581	3692	5073	3135	2134	5367	4506
280	1686	2931	8384	2596	4893	3750	2543	2102	5392	4639	2285	3391	1640	3055	907	3985	7016	3637	7875	5618	2889	2017	1666	7888	4290	7778	799	2716	789	2668	2239	5697	6936	7235	8467	4987	1202	4764	3307	1513	3211	8065	2421	3729	5177	2959	2143	5252	4571
281	1632	3092	8072	2715	5043	4025	2596	2201	5341	4478	2256	3765	1382	2956	1100	4375	7026	3922	7518	5136	3085	2100	1770	7819	4249	7824	840	2739	980	2721	2302	4528	7465	7309	8110	5251	949	4749	3133	1599	3095	8147	2461	3843	5286	3084	1867	5461	4353
282	1438	3072	7954	2557	5279	3667	2443	2009	5389	4380	2487	3772	1605	3083	916	4337	7001	3679	7412	5358	3204	1938	1849	7654	4272	7934	927	2865	1040	2674	2270	5269	7769	7189	8401	5145	1112	4721	3210	1530	3136	8099	2553	3685	5192	3140	2164	5716	4516
283	1309	2945	8035	2515	4909	3821	2465	2036	5608	4845	2252	3947	1544	3217	970	4232	7030	3715	7618	5512	3124	1961	1555	7604	4513	7598	918	2746	930	2707	2179	5267	6666	7359	8039	4862	1134	4802	3144	1547	3083	8006	2333	3777	5339	3051	1961	5370	4129
284	1685	2987	7923	2483	4885	3590	2489	2073	5225	4554	2219	3474	1462	3075	852	4428	7152	3675	7549	5295	3305	1563	1558	7633	4288	7488	767	2767	951	2770	2286	5685	7554	7359	8175	4882	1282	4528	3252	1584	3227	8126	2443	3863	5369	3159	1990	5522	4402
285	1507	2881	7861	2497	5091	3721	2649	2114	5084	4335	2327	3882	1409	3286	894	4226	7121	3680	7774	5781	3255	1515	1529	7687	4209	7599	920	2787	789	2666	2108	5519	6842	7328	8066	5067	1238	4678	2907	1659	3116	8091	2403	3727	5145	2799	1885	5238	4307
286	1667	2948	7852	2565	5214	3869	2494	2170	5533	4605	2011	3335	1781	2884	1097	4028	7229	3730	7475	5594	3217	1880	1529	7799	4364	7611	901	2645	891	2599	2494	5670	7095	7455	8398	5105	1084	4491	3318	1534	3206	8243	2559	3863	5159	2994	1981	4625	4405
287	1481	2894	8162	2403	4813	3757	2541	2062	5315	4531	2181	3462	1653	2996	948	4066	7165	3760	7895	5404	3238	1946	1681	7583	4315	7760	710	2813	718	2499	2250	5586	7786	6880	8069	4711	1241	4528	3279	1577	3024	8116	2497	4008	5322	3078	2314	5615	4452
288	1517	3100	8347	2218	5081	3744	2568	1976	5431	4433	1958	3782	1573	2861	854	4210	7184	3697	7672	5347	3095	2179	1683	7777	4435	7985	713	2797	835	2545	2277	5626	7748	7105	8239	5182	1085	4684	3211	1704	3064	8057	2490	3673	5197	2860	2134	5299	4357
289	1643	2991	7935	2629	5206	3735	2592	2289	5364	4596	2153	3865	1706	3129	1203	4005	7097	3523	7968	5413	3002	1555	1733	7644	4385	7464	756	2906	857	2553	2362	4655	7573	6962	8246	5007	1151	4625	3328	1698	3107	8084	2462	3821	5184	2993	1944	5288	4430
290	1557	2828	7825	2657	5211	3645	2523	1927	5222	4524	1930	4109	1598	2926	1113	4276	7064	3686	7504	5344	2986	2176	1850	7199	4316	7769	951	2685	956	2640	2365	4689	7283	6903	8613	5085	1201	4730	3232	1600	3111	8045	2434	3893	5293	2989	1936	5284	4230
291	1349	3054	8089	2602	5034	3888	2384	2086	5071	4574	1808	3521	1873	3091	1032	4335	7238	3617	7654	5388	2932	2122	1708	7259	4319	7621	666	2808	819	2666	2360	5605	7569	7411	8061	4981	1143	4500	3311	1616	3038	8313	2722	3798	5083	3236	2124	5534	4753
292	1181	3198	7970	2397	4934	3885	2319	2258	5304	4439	1888	3656	1669	3138	923	4111	6816	3773	7097	5551	2902	1971	1465	7434	4246	7694	881	2840	775	2703	2246	5568	7338	7118	8317	4991	1102	4770	3423	1630	3111	8129	2431	3835	5208	2950	1848	5487	4350
293	1614	2795	8187	2519	5174	3845	2355	2008	5017	4424	1809	3482	1595	3138	770	4134	7198	3620	6849	5096	2872	2145	1659	7736	4596	7726	1004	2540	975	2886	2303	4466	7684	7388	8414	5031	861	4649	3049	1615	3084	7793	2494	3716	5145	2850	2026	5505	4279
294	1525	3186	8351	2481	5129	3897	2472	2153	5100	4527	1793	3480	1616	3286	948	4301	7223	3798	7323	5612	3050	2015	1500	7719	4270	7708	888	2690	699	2747	2171	4877	7793	7244	8228	5089	989	4748	3313	1649	3267	8152	2593	3755	5157	3048	1974	5452	4490
295	1532	3131	7854	2600	4889	3671	2409	2086	5219	4389	1720	3816	1688	3198	951	4107	7069	3596	7801	5327	3011	1834	1846	7844	4229	7776	882	2880	1068	2699	2434	5731	7445	7411	8362	5008	1250	4550	3060	1651	3215	8236	2388	3838	5044	2885	2194	5522	4404
296	1502	3142	8344	2533	5059	3984	2535	2267	5314	4454	1912	3740	1508	3031	895	4298	6958	3593	7941	5190	3143	1898	1580	7575	4363	7802	925	3099	853	2607	2462	5627	7617	7415	8062	4860	949	4667	3130	1565	3131	7898	2383	3655	4924	2996	1791	5335	4325
297	1491	3084	8106	2784	4851	3887	2309	2103	5767	4491	1940	4201	1428	3150	818	4409	7108	3483	8091	5409	3128	2075	1745	7524	4679	8158	1018	2764	876	2798	2473	5636	7493	7025	8324	5166	1078	4903	3185	1543	3232	8019	2414	3995	5044	2985	2047	5618	4551
298	1253	3184	8076	2489	4906	3618	2386	2084	5503	4586	1940	3839	1682	2982	910	4351	7190	3799	8122	5481	3083	2020	1605	7957	4754	8017	779	2808	916	2739	2211	5794	7444	7045	8247	4833	1142	4723	3182	1484	3092	8044	2702	3762	4915	2841	2414	5549	4308
299	1556	3017	8157	2647	5097	3800	2468	2200	5252	4743	1894	3481	1385	2879	905	4205	7149	3679	7488	5561	3093	1747	1708	7547	4258	7535	1124	2756	970	2904	2327	5791	6774	7299	8294	4978	1392	4618	3134	1663	3016	8294	2437	3734	4983	3017	2339	5578	4413
300	1499	2913	8068	2746	5178	4043	2396	2100	5513	4427	1750	3871	1598	3156	788	4486	6908	3682	7564	5427	2970	1871	1863	7584	4707	8082	955	2685	841	2513	2200	5822	7114	7050	8208	4833	1143	4631	3216	1635	3218	8080	2506	3802	5087	2880	2149	5424	4476
301	1582	3044	8179	2492	5218	3726	2458	2111	5285	4666	1800	3806	1571	3099	819	4646	7159	3412	7506	5193	2963	1778	1515	7609	4399	7701	662	2821	803	2910	2249	5002	7794	7198	8113	4887	1245	4884	3119	1576	3320	7930	2395	3751	4862	2846	2358	5356	4316
[truncated: 201 more columns]

## Sheet: ASE WT,unc18,odr10 to dia
Figures 5D, 5S-1K
ASE::GCaMP3 F(A.U.)
Stimulus:	0																																							1.15 µM diacetyl
Genotype:	WT																																							WT
N:	1	2	3	4	5	6	7	8	9	10	11	12	13	14	15	16	17	18	19	20	21	22	23	24	25	26	27	28	29	30	31	32	33	34	35	36	37	38		1	2	3	4	5	6	7	8	9	10
Frame (Pulse at 100)
1	1046	957	1118	1085	1332	1070	945	1313	905	1241	1528	1547	1111	698	792	2014	1669	951	1105	425	875	610	741	306	1441	1373	986	969	678	1853	1701	906	1119	395	766	637	695	970		948	673	1090	1104	1117	875	892	1272	625	1372
2	1142	802	867	972	1515	1082	795	1269	909	1571	1478	1628	1090	763	781	1991	1760	831	1106	265	678	857	791	561	1419	1278	1100	701	776	1944	1512	798	1242	320	755	584	752	959		958	695	1358	1028	1252	898	745	1000	792	1210
3	1137	748	988	1193	1242	937	870	1397	1101	1483	1549	1393	1018	660	621	1795	1532	1028	1376	461	652	771	797	590	1499	1295	951	793	538	1744	1655	758	1187	330	729	824	817	781		1166	647	1057	1062	1113	1086	698	1121	678	1444
4	962	821	972	1005	1284	1026	811	1376	1051	1356	1702	1323	915	722	555	1912	1502	867	1180	361	759	856	895	668	1551	1447	909	784	666	2003	1588	916	1150	356	747	768	814	800		855	659	1217	1092	992	1069	914	1134	709	1261
5	1008	934	771	1007	1318	1002	1057	1142	913	1194	1498	1391	945	656	758	1847	1661	801	1287	396	604	876	771	809	1483	1346	1077	912	777	2089	1394	987	1025	367	820	631	644	748		1039	782	1266	1110	1285	960	723	1358	595	1234
6	981	888	994	1159	1316	1052	793	1250	1074	1515	1575	1412	1019	783	728	1940	1653	949	1218	378	914	860	966	757	1371	1464	1094	812	722	1891	1256	752	1107	378	834	724	635	736		1036	652	1295	1082	1088	1082	543	1273	836	1174
7	1050	886	871	1006	1437	1087	785	1147	1049	1507	1166	1439	957	693	701	2219	1683	1035	1100	258	815	772	810	664	1522	1258	1060	901	484	2055	1667	916	1180	326	870	570	748	615		887	857	1399	1005	1113	994	664	1261	732	1201
8	1228	811	958	1012	1240	970	845	1167	1102	1278	1508	1282	1059	644	702	2042	1633	830	1222	343	836	655	760	842	1414	1451	1058	845	558	1894	1565	864	1171	262	729	718	834	656		859	753	1193	981	1056	721	886	1178	429	1188
9	1084	928	1057	1046	1529	1141	873	1263	1039	1363	1690	1437	990	634	625	2011	1718	890	1053	428	835	676	581	703	1430	1360	931	770	679	1843	1466	921	1085	360	763	788	749	731		968	938	1320	1160	1313	960	692	1279	809	1459
10	1109	805	825	898	1285	1158	732	1126	1183	1285	1599	1472	973	956	588	2069	1576	1134	1240	379	757	667	781	769	1380	1241	1039	875	682	1996	1589	830	1068	228	586	721	753	558		905	809	1208	1113	1027	1095	770	1181	509	1257
11	1038	807	768	983	1244	1029	663	1314	798	1425	1605	1389	1036	661	678	2018	1592	819	1197	196	619	750	839	952	1433	1331	938	751	542	2123	1528	873	1158	214	745	512	809	459		881	572	1334	1106	1293	1048	707	1189	794	1291
12	974	854	940	1082	1561	1063	570	1288	1068	1484	1612	1346	1136	654	675	1931	1664	904	1279	315	676	754	714	795	1340	1311	958	873	814	1908	1456	820	1196	380	826	659	710	756		814	859	1434	1234	1130	1082	860	1215	727	1196
13	1053	713	829	1100	1034	1019	894	984	1033	1365	1718	1308	1029	644	639	1969	1535	988	1159	241	798	767	771	760	1421	1285	909	821	828	1871	1681	936	930	332	753	622	750	849		806	935	1247	1162	1320	1027	736	1182	688	1084
14	1157	1060	947	993	1413	1039	836	1151	1025	1265	1549	1442	1021	730	757	2271	1736	817	1147	315	558	830	830	713	1465	1352	914	810	687	2017	1611	819	1030	304	803	762	832	733		891	780	1148	1051	1305	918	714	1272	595	1188
15	1017	732	854	860	1390	1214	849	1225	903	1204	1646	1446	944	667	714	1950	1855	910	1149	350	679	681	859	778	1426	1348	976	834	641	1859	1566	963	1068	356	816	765	791	808		997	767	1311	1077	1062	847	647	1177	896	1236
16	1247	730	741	1077	1450	1090	807	1254	1059	1553	1693	1482	1148	739	742	2011	1765	1004	1090	163	767	815	951	702	1446	1346	1014	784	556	2006	1387	792	1134	286	891	726	757	784		1067	913	1323	1241	1171	1042	741	1165	824	1256
17	986	825	942	1073	1097	1069	809	1263	980	1287	1605	1432	1006	573	815	2050	1638	1014	1033	355	619	845	738	880	1555	1428	1054	900	652	2168	1478	813	1093	440	793	742	831	929		1017	619	1269	1353	1220	976	854	1161	668	1368
18	1145	809	869	828	1208	1174	628	1288	1104	1287	1598	1454	1012	782	547	1980	1535	919	1138	216	979	714	743	816	1502	1368	1072	923	703	1896	1517	874	1112	435	770	698	804	891		976	780	1377	1103	1245	1095	799	1207	657	1246
19	1200	784	870	858	1526	1022	747	1223	1027	1284	1424	1366	1080	653	713	1922	1665	916	1023	224	813	725	794	576	1419	1326	996	803	670	2220	1690	703	957	437	785	745	774	696		765	698	1169	897	1052	900	775	1259	707	1220
20	1015	944	899	822	1353	1024	797	1162	1059	1221	1496	1477	1000	753	676	2207	1859	942	1050	363	732	736	783	664	1430	1258	831	724	661	1912	1556	922	1044	305	766	743	748	736		822	795	1336	1174	1343	983	794	1231	560	1215
21	889	847	1026	1017	1360	1223	782	1086	895	1270	1577	1476	1052	784	729	1993	1558	994	975	274	788	733	819	738	1431	1411	870	1010	717	1946	1575	776	1008	448	502	719	678	822		1063	781	1291	1069	1274	900	618	1279	604	1268
22	1030	1033	1125	983	1425	885	841	1169	984	1332	1517	1329	1058	763	678	1940	1414	895	1298	380	692	625	862	838	1421	1306	1058	710	614	2006	1653	775	1290	511	716	731	649	828		775	735	1087	1207	1175	974	723	1038	754	1299
23	1154	829	1069	1124	1233	1147	811	1208	1098	1516	1433	1491	1032	895	743	2179	1560	916	1138	335	610	653	750	689	1291	1331	1019	797	701	1764	1515	926	904	204	790	653	862	747		767	756	1285	1038	1231	949	687	1202	654	1192
24	1139	870	855	1011	1323	1092	1011	1180	934	1352	1662	1444	1046	803	726	1825	1574	993	1192	217	812	742	788	728	1261	1253	1117	693	786	1991	1820	1064	1233	505	917	562	773	652		896	753	1200	1029	1277	965	718	1355	714	1261
25	1052	779	791	875	1115	941	1034	1128	960	1283	1670	1560	996	657	811	2008	1546	816	1035	272	555	865	725	871	1534	1455	1012	976	703	1811	1638	806	1078	416	866	685	922	751		921	901	1234	1149	1243	986	762	1330	600	1382
26	1146	583	852	1021	1503	1130	894	1288	1182	1187	1506	1406	994	758	705	1888	1694	865	1311	266	714	659	655	661	1460	1396	1000	765	769	1962	1673	789	1164	343	837	645	800	702		919	674	1048	1209	1156	971	798	1315	695	1149
27	847	784	1016	945	1449	1119	703	1135	920	1276	1499	1340	957	788	688	2059	1448	823	1200	508	792	803	798	890	1547	1425	928	956	665	1980	1665	795	1243	471	807	664	736	710		905	1032	1218	1181	1295	1047	661	1060	626	1248
28	1117	899	884	1019	1394	1057	862	1349	1087	1347	1630	1198	986	677	694	2172	1516	1115	1134	348	793	688	884	753	1439	1367	927	754	698	1964	1394	960	1098	350	658	936	788	766		1200	587	1245	1277	1103	880	693	1301	662	1323
29	990	910	982	1058	1280	1088	839	1357	1151	1429	1480	1448	935	813	664	1994	1626	922	1314	354	830	629	972	749	1499	1252	1102	778	713	1884	1500	924	1075	125	904	655	691	793		854	812	1354	1128	1026	912	768	1264	726	1297
30	1170	810	912	993	1249	1178	809	1215	1066	1301	1742	1388	868	658	575	1989	1451	999	984	336	740	681	822	760	1580	1316	1040	802	734	1831	1557	907	1312	451	784	688	761	777		941	756	1339	1221	1053	984	815	1263	582	1216
31	1197	736	835	913	1389	1041	850	1114	902	1443	1677	1207	1013	748	759	2150	1684	836	1216	431	842	633	727	709	1518	1236	993	922	659	2007	1510	1055	1146	328	726	753	622	826		892	856	1250	1101	1234	1157	656	1033	715	1161
32	1004	704	1070	1101	1340	1092	841	1160	1034	1193	1657	1521	897	479	647	2014	1703	940	1097	366	759	575	879	623	1504	1371	887	912	693	1931	1747	724	1171	265	855	872	806	810		996	838	1268	1020	982	1180	780	1356	773	1299
33	1236	824	901	1032	1249	1147	748	1277	1105	1442	1608	1563	1084	695	713	2017	1713	1195	1189	86	803	662	829	802	1729	1429	929	946	674	2051	1739	998	1199	265	896	736	655	788		959	692	1241	1146	1326	1022	824	1134	554	1497
34	1157	982	1019	917	1221	1077	878	1186	958	1346	1561	1531	1054	610	712	2055	1476	1119	998	415	725	737	771	887	1489	1373	1046	829	809	1867	1764	723	1132	375	975	684	833	615		961	711	1336	1189	1234	1121	872	1336	582	1232
35	963	836	922	1058	1332	1048	765	1144	1048	1324	1537	1334	894	683	635	1920	1488	1033	1217	303	819	810	910	707	1499	1552	998	820	492	2120	1569	732	1148	325	763	615	787	653		948	762	1162	1173	1042	1054	753	1280	549	1251
36	1037	733	934	853	1327	966	888	1210	1097	1415	1431	1499	931	745	673	2050	1670	1002	1001	341	946	796	723	788	1444	1337	1124	932	678	2026	1427	873	1208	308	809	691	868	857		790	661	1208	1053	1218	923	920	1085	657	1172
37	1299	945	912	1008	1232	1051	751	1286	927	1416	1523	1530	1136	784	775	2024	1802	957	1170	470	705	736	580	669	1394	1372	882	720	725	1871	1592	875	999	297	833	484	780	876		1049	622	1201	1061	1214	1047	540	1364	666	1358
38	996	947	710	1128	1251	1112	966	1127	1139	1360	1418	1355	1076	600	768	2155	1457	961	1169	386	796	676	667	611	1491	1412	1019	752	780	1884	1649	731	1165	350	717	636	633	863		741	886	1317	1024	1118	1022	774	1309	652	1213
39	1018	766	939	1016	1231	1114	841	1328	1105	1318	1581	1355	944	666	679	1971	1732	754	1194	394	639	794	849	578	1576	1292	920	738	657	1841	1607	901	1233	327	873	611	739	774		1010	829	1477	1183	1271	1032	747	1211	620	1263
40	845	827	1183	947	1363	960	831	1194	979	1240	1501	1536	847	722	661	2055	1377	926	1298	382	645	826	635	545	1421	1376	951	905	594	1929	1674	857	1058	374	830	705	647	730		992	667	1192	1329	1243	955	772	1167	690	1318
41	1069	795	971	1098	1505	1076	877	1298	1085	1431	1621	1407	992	665	715	1901	1492	800	1245	349	529	792	830	654	1404	1328	1023	737	638	1979	1515	673	1022	273	818	693	639	725		884	684	1238	1198	1107	963	808	1286	636	902
42	1238	881	1076	958	1277	950	723	1204	971	1230	1673	1654	965	671	788	2147	1550	983	1202	318	767	624	647	758	1379	1365	912	932	708	1855	1618	875	1101	359	743	722	522	787		723	606	1127	904	1223	1025	907	1370	740	1302
43	1183	963	953	1073	1427	1120	704	1066	1190	1312	1470	1448	963	689	671	2087	1730	940	963	376	674	860	937	694	1347	1262	832	846	635	1938	1456	884	875	335	857	646	779	805		1005	853	1519	887	1271	1049	831	1288	813	1209
44	1171	722	862	1164	1190	1149	958	1278	1006	1220	1481	1281	1032	698	850	1822	1276	1133	1153	405	655	826	559	730	1595	1464	928	840	697	1931	1625	885	1183	265	794	723	739	684		983	718	1272	938	1349	977	693	1256	661	1252
45	1124	847	843	975	1519	1028	798	1172	1154	1318	1592	1396	1189	634	660	2113	1770	1044	1132	312	689	712	705	790	1545	1320	888	942	676	2068	1541	747	1212	415	647	515	778	765		1007	578	1139	961	1345	1003	611	1027	512	1322
46	1175	1110	978	1009	1281	1053	850	1118	994	1475	1476	1392	851	573	800	1909	1723	990	1235	349	622	590	877	715	1523	1328	973	872	703	1794	1464	880	1057	390	745	765	734	679		1021	794	1310	913	1152	919	685	1210	585	1256
47	985	860	974	1135	1269	950	929	1222	996	1186	1366	1397	948	818	669	1865	1625	956	1288	305	712	728	783	848	1439	1315	1033	887	674	1886	1836	813	1208	486	823	610	726	599		1092	825	1317	758	1170	1136	878	1182	787	1250
48	1187	752	1004	1015	1342	1199	716	1051	1157	1381	1579	1647	913	924	605	2117	1604	678	1065	387	701	663	828	628	1395	1383	925	976	702	1966	1486	783	1175	220	717	801	857	765		1005	847	1241	689	1255	1068	693	1358	749	1065
49	1058	905	909	1073	1327	1099	868	1037	1117	1411	1580	1400	983	777	785	2042	1592	993	1129	282	639	886	853	788	1503	1339	1018	695	752	1989	1499	807	1117	221	719	663	915	659		1158	807	1224	866	1173	1085	751	1286	416	1139
50	1146	876	1011	1026	1255	1112	973	1196	957	1398	1415	1499	1121	713	737	2040	1937	1022	1224	454	642	908	972	729	1546	1424	1091	915	652	2004	1417	709	1126	384	885	670	748	708		932	717	1171	941	1200	1076	666	1285	780	1213
51	1153	866	1146	1088	1423	1115	730	1191	1011	1343	1706	1327	1148	724	594	1945	1614	880	1172	184	748	738	716	692	1534	1153	930	801	786	2009	1457	679	1300	279	764	645	655	728		1067	781	1370	953	1398	1066	827	1124	821	1093
52	1121	953	960	964	1204	1045	765	1119	1044	1040	1685	1190	976	785	625	2141	1463	795	1231	419	738	798	823	792	1608	1342	975	780	769	1943	1568	877	1307	274	794	729	991	789		885	830	1401	831	1227	1145	857	1139	640	1393
53	1099	978	918	1038	1390	1196	818	1220	946	1166	1521	1440	1039	684	687	2017	1567	1042	1026	334	741	762	938	806	1522	1306	1077	679	785	1913	1468	859	1196	449	847	692	693	609		1121	542	1170	692	1127	1056	895	1181	694	1232
54	1126	597	943	1011	1295	1149	960	1078	944	1237	1708	1582	1038	603	720	2007	1699	785	1095	231	798	766	741	731	1527	1333	1094	799	770	2101	1489	981	1042	387	838	692	691	864		983	666	1252	913	1311	1146	819	1267	687	1215
55	1158	797	1092	1193	1117	1035	514	1282	1110	1335	1507	1386	1000	683	745	1992	1604	938	879	305	886	661	731	622	1480	1369	1043	805	773	1875	1599	798	1225	346	759	825	879	721		928	806	1260	828	1205	970	831	1258	692	1316
56	1174	1133	890	945	1567	1111	724	1091	1126	1282	1653	1714	970	623	732	2085	1449	810	1059	355	1003	698	742	919	1627	1397	875	841	819	1948	1314	959	1116	457	877	678	835	673		955	748	1172	849	1232	941	710	1214	818	1332
57	1009	991	912	1006	1426	1059	875	1424	1271	1489	1584	1443	1009	742	654	2204	1587	852	1006	256	838	814	628	696	1481	1312	1126	892	704	2029	1623	855	1114	278	761	707	930	698		1060	760	1226	929	1324	904	801	1481	678	1144
58	1091	832	919	954	1361	1120	916	1216	1201	1436	1723	1358	883	604	760	2073	1368	803	1302	532	775	664	759	647	1479	1513	977	810	630	1995	1769	850	1119	206	742	626	755	943		1109	800	1161	779	1339	987	886	1247	853	1176
59	992	878	982	957	1487	1102	851	1260	937	1417	1613	1436	1010	694	648	1987	1678	963	1169	315	760	800	721	606	1391	1261	1041	843	805	1946	1603	783	1170	483	969	565	711	808		1133	591	1333	978	1237	1119	901	1188	677	950
60	993	788	853	1048	1173	1146	776	1251	941	1194	1632	1446	1138	781	686	2024	1868	1009	1075	240	731	839	833	648	1564	1214	919	910	706	1964	1713	951	1150	357	760	631	1018	769		879	895	1290	721	1377	993	829	1234	676	1281
61	1097	794	1071	1091	1328	1058	751	1091	1045	1261	1493	1595	1031	658	656	1965	1362	992	1225	262	776	747	831	843	1252	1423	1040	869	638	1916	1607	852	1215	452	805	732	752	753		1096	716	1213	803	1273	986	845	1012	713	1079
62	1088	831	810	874	1281	849	763	1249	1113	1202	1576	1364	845	657	697	1954	1501	979	1066	469	838	661	802	703	1487	1422	1012	845	755	1933	1516	866	1036	271	866	716	826	784		1027	641	1155	836	1155	742	758	1394	674	1169
63	1081	861	836	911	1319	1147	746	1279	1097	1437	1432	1369	929	693	648	2056	1657	790	1064	292	722	760	786	837	1420	1422	1000	1007	719	2097	1516	883	1326	214	692	756	836	757		1017	591	1236	795	1332	936	778	904	815	1316
64	1174	941	815	891	1404	1028	904	1223	1123	1164	1529	1515	792	825	848	2202	1344	989	1033	365	646	725	665	832	1452	1223	1093	866	604	1843	1590	869	1136	334	745	690	832	841		945	664	1320	489	1231	1039	789	1089	726	1143
65	1010	749	1190	1243	1274	1214	729	1262	1030	1507	1565	1493	890	652	631	2103	1541	863	994	463	660	614	816	595	1359	1314	925	799	724	1849	1661	717	1048	357	963	857	712	635		986	728	1309	601	1044	1091	920	1444	656	1242
66	1149	842	920	848	1104	813	769	1275	1071	1293	1638	1534	1046	662	688	1905	1718	1047	1180	481	772	655	710	844	1556	1431	939	923	736	1864	1497	922	1149	275	796	583	920	918		1012	692	1221	649	1325	900	716	1261	584	1218
67	969	687	1029	1025	1441	1139	882	1368	968	1415	1611	1124	979	614	737	1921	1700	913	1056	308	818	740	748	930	1684	1501	1127	771	599	1788	1694	960	1178	308	820	811	646	894		989	837	1284	751	1361	1146	733	1212	744	1121
68	1035	847	978	1094	1202	984	856	1176	1078	1438	1606	1316	1029	543	718	2025	1448	923	1080	460	760	697	725	560	1434	1439	797	782	588	1988	1726	807	1052	331	728	712	675	740		939	545	1083	635	1272	912	652	1388	731	1345
69	1111	744	1080	1027	1416	1010	960	1420	875	1481	1806	1473	978	577	730	1805	1682	945	1223	343	756	729	924	672	1463	1390	950	859	653	1945	1571	823	1179	222	903	647	497	765		987	770	1072	926	1347	940	794	1143	786	1123
70	1045	815	787	892	1392	897	785	1116	1228	1446	1619	1402	973	604	704	2054	1613	965	1118	324	709	773	664	593	1293	1206	999	905	674	2013	1580	917	1052	302	770	577	794	890		962	1034	1288	785	1199	1196	651	964	765	1484
71	1035	812	952	1075	1330	1047	895	1147	1012	1412	1383	1406	992	866	633	1979	1558	1085	1236	306	557	715	816	772	1491	1376	911	785	507	1953	1633	1032	1109	313	705	742	687	895		1048	812	1336	869	1263	935	797	1197	620	1354
72	1075	794	757	972	1183	1022	823	1204	1040	1232	1742	1288	1052	930	776	1873	1334	933	1155	255	785	668	731	519	1445	1298	939	770	576	2000	1506	874	1208	264	853	542	650	743		1007	657	1381	763	1341	951	690	1293	654	1179
73	1115	768	1067	1052	1344	1030	921	1151	957	1143	1602	1278	1108	775	683	2038	1611	972	1064	485	731	795	914	719	1381	1365	1047	881	715	1914	1576	692	1125	131	671	700	866	751		1024	636	1260	700	1233	960	609	1216	648	1307
74	1120	773	1073	1051	1320	968	649	1276	1045	1502	1763	1177	1080	843	721	2098	1467	1000	1179	421	736	680	811	780	1557	1404	900	797	720	2015	1691	727	1103	366	662	585	689	813		950	641	1249	788	1257	835	803	1274	695	1145
75	1152	998	962	1013	1393	1061	924	1424	1016	1383	1425	1551	903	910	526	1803	1587	1231	1180	263	631	771	933	701	1415	1279	1023	920	648	2042	1596	807	1084	356	683	663	767	793		1023	555	1149	827	1099	824	835	1083	651	1052
76	1158	909	1137	1049	1279	1094	759	1192	885	1438	1469	1472	918	668	663	1996	1566	1077	1224	184	584	715	682	659	1370	1417	991	835	742	1860	1500	807	1147	327	954	575	793	620		1150	876	1140	713	1252	1007	841	1250	771	1047
77	989	642	945	947	1357	943	827	1126	1003	1269	1368	1189	1095	746	642	2151	1592	1002	1150	370	786	750	807	724	1503	1313	915	827	721	1937	1509	1011	1153	317	790	749	705	768		873	794	1306	755	1323	937	373	1128	706	1087
78	1133	586	991	1105	1468	1051	950	1136	1122	1379	1584	1488	997	797	840	2066	1511	1033	1210	569	836	719	688	764	1573	1523	961	669	759	1811	1624	755	1128	284	564	791	742	838		928	995	1333	847	1334	937	672	1179	559	1306
79	991	803	990	815	1377	1166	881	1234	1092	1418	1597	1454	949	884	804	2034	1385	989	1183	283	861	664	884	508	1611	1406	1019	857	600	2086	1458	672	1052	271	659	731	771	740		1008	743	1128	586	1262	791	806	1017	625	1340
80	1032	784	986	1103	1259	1122	963	1147	1010	1224	1589	1342	923	756	769	2003	1545	1044	1236	252	900	785	699	699	1455	1504	1092	677	701	1918	1559	680	1278	446	800	691	660	896		1005	685	1311	695	1144	1108	753	1365	750	1218
81	1103	923	930	1062	1611	1097	847	1381	1035	1359	1791	1381	1087	808	583	1985	1516	858	1238	416	613	792	705	781	1358	1311	922	765	605	1948	1690	805	1146	245	848	697	661	675		1016	731	1163	883	1268	1124	754	1085	583	1059
82	1097	917	1090	1191	1401	1220	820	1241	1033	1318	1547	1498	1013	978	763	1932	1507	961	1029	394	836	798	889	790	1567	1444	1015	852	759	2327	1511	854	1084	312	723	732	617	845		929	825	1406	769	1090	1098	951	1139	762	1163
83	1133	869	1036	1002	1263	982	852	1339	1010	1299	1644	1237	1036	822	735	1946	1637	916	1156	321	775	826	867	815	1429	1367	1105	732	665	1920	1462	1053	1029	353	856	826	647	842		988	757	1414	870	1097	852	919	1361	588	1143
84	1156	849	946	1020	1298	1044	761	1098	1116	1230	1746	1487	1169	802	579	2077	1540	1009	1460	340	759	669	729	767	1418	1210	1065	822	572	1898	1575	622	1077	360	800	701	708	821		1120	699	1344	759	1367	1012	642	1224	615	1367
85	1028	736	1064	1058	1306	966	926	1271	1082	1318	1555	1432	1081	926	674	1924	1339	992	1169	476	674	750	628	726	1379	1194	928	804	677	1947	1600	847	966	351	927	640	697	761		885	706	1315	664	1196	945	704	1113	742	1213
86	1044	885	988	1019	1354	927	980	1222	1082	1310	1471	1485	1023	769	679	2041	1668	1103	1195	266	861	855	856	670	1522	1349	1151	915	623	1917	1647	863	1140	309	681	800	664	729		1013	717	1356	679	1200	890	964	1144	605	1215
87	978	747	903	1148	1234	1214	839	1545	1242	1428	1763	1391	794	828	812	1963	1395	986	982	381	659	731	846	474	1422	1352	898	853	671	2067	1587	820	1102	289	775	598	698	683		924	831	1074	681	1368	1070	913	1171	714	1239
88	1116	834	1052	1057	1412	1095	905	1362	1134	1280	1601	1419	1030	813	609	2031	1554	900	1326	178	534	743	725	765	1513	1497	964	778	774	2001	1622	740	1010	376	622	695	833	799		1148	632	1145	778	1423	944	743	1222	686	1376
89	994	904	950	986	1405	1104	827	1061	1010	1293	1639	1666	839	791	872	2135	1592	881	1230	249	711	690	756	718	1421	1400	1176	824	652	1889	1680	969	1134	283	730	704	784	877		1211	554	1308	610	1186	940	696	1125	487	1238
90	1088	800	935	1113	1354	879	998	1144	1183	1382	1577	1641	1109	838	727	2189	1653	742	1148	419	882	802	837	609	1469	1353	946	854	648	2011	1559	763	1205	267	807	787	771	764		994	711	1266	975	1347	830	612	1255	580	1088
91	1180	703	1117	1027	1413	1018	874	1300	1072	1209	1476	1515	1041	860	788	1984	1555	1031	1192	365	817	803	793	703	1295	1473	962	838	627	1944	1527	790	1024	469	784	673	783	711		1012	765	1248	835	1198	1094	900	1198	704	1223
92	1049	929	1051	979	1629	1084	805	1073	1179	1362	1652	1351	1078	868	749	2088	1401	999	1021	261	656	700	831	773	1486	1280	977	922	672	1995	1649	954	1256	424	834	607	785	746		1029	724	1317	785	1158	910	811	1308	776	1390
93	1215	868	1016	851	1238	981	979	1137	965	1336	1491	1489	1015	908	683	2077	1722	944	1327	219	936	745	840	539	1406	1403	900	820	682	2028	1737	857	1175	262	857	887	733	786		954	658	1298	800	1060	844	757	1236	826	1266
94	1012	1033	975	1056	1381	981	925	1268	994	1441	1564	1468	973	787	656	2174	1639	944	1153	199	787	812	733	519	1468	1326	866	765	773	1976	1465	887	1283	341	881	733	503	828		1062	703	1334	641	1352	871	771	1328	710	1208
95	880	647	1078	1100	1538	961	777	1332	1085	1399	1540	1161	970	790	759	2029	1558	879	1239	230	650	708	812	651	1304	1229	935	776	575	1879	1704	908	1234	400	643	803	711	742		849	619	1321	789	1302	974	827	1344	753	1307
96	1024	652	970	842	1375	1107	522	1376	930	1539	1509	1483	1005	913	726	2142	1716	701	1109	346	725	753	792	589	1427	1387	909	801	720	1960	1803	1108	890	350	828	775	768	840		828	814	1306	895	1083	996	878	1484	579	1248
97	1053	837	1084	1051	1185	1045	768	1231	975	1570	1695	1381	1099	769	679	2015	1299	848	1120	378	869	775	747	482	1368	1341	961	821	721	1832	1669	753	1031	322	677	733	852	873		912	902	1215	759	1248	962	651	1305	771	1178
98	1160	913	896	1078	1181	983	795	1306	890	1284	1630	1126	1007	849	654	1963	1572	964	1070	424	599	626	763	721	1458	1507	1015	901	744	2043	1644	906	1184	466	779	674	766	769		847	841	1267	693	1206	983	626	1245	625	1135
99	1180	740	767	1039	1321	972	944	1304	1179	1504	1723	1578	1023	824	620	1827	1805	880	1034	361	827	765	624	549	1349	1409	966	855	663	2149	1504	664	1054	256	736	796	601	633		1053	718	1061	822	1172	963	550	1224	641	1274
100	1115	725	1110	957	1310	947	698	1091	933	1228	1574	1455	1151	801	855	1867	1379	989	1160	483	864	775	865	759	1473	1285	1149	677	678	1997	1357	817	949	290	736	709	849	796		864	769	1242	718	1271	878	657	1166	753	1203
101	1066	707	974	1071	1369	1051	898	1309	1129	1171	1630	1414	1057	872	708	1876	1458	882	1242	422	812	893	816	601	1425	1439	912	679	636	2039	1648	763	1229	496	1021	578	865	796		952	641	1311	658	1325	939	710	1125	800	1194
102	1180	903	1065	850	1361	1179	774	1290	1038	1412	1545	1442	953	880	632	1949	1506	1002	1027	381	908	891	643	636	1309	1338	1046	854	686	2049	1448	900	1078	463	783	635	722	786		1009	556	1131	530	1414	1065	790	1285	560	1221
103	1048	848	944	1037	1480	1025	757	1173	1207	1224	1525	1356	915	703	507	2042	1521	862	926	210	556	746	680	651	1540	1370	1114	624	732	2076	1734	889	1149	336	729	573	825	839		1102	780	1335	597	1319	971	731	1220	707	1074
104	993	774	972	1022	1459	949	775	1393	962	1440	1666	1473	909	748	660	2021	1747	824	1131	291	871	729	752	550	1484	1395	940	839	698	2081	1600	871	1329	437	817	728	758	816		949	815	1281	761	1276	928	814	1286	840	1171
105	1153	752	957	994	1436	1060	782	1127	947	1406	1487	1473	1060	628	567	2046	1604	873	1237	434	828	606	590	666	1410	1528	1013	856	756	2107	1718	806	1095	176	743	632	817	838		945	494	1299	650	1310	827	884	1228	593	1183
106	1055	853	1059	1098	1397	981	905	1213	982	1345	1803	1495	1025	898	737	2014	1426	1024	1292	301	674	765	864	761	1390	1369	1062	707	684	2045	1519	712	1111	408	971	709	860	876		1038	596	1249	731	1282	1028	770	1202	556	1225
107	954	840	1052	984	1299	969	682	1189	952	1419	1626	1544	1078	763	759	2023	1702	1052	1046	366	900	877	607	471	1266	1335	970	733	798	1917	1322	880	998	321	695	819	641	845		971	906	1167	627	1206	1026	715	1222	663	1354
108	1139	751	956	994	1635	1053	837	1218	1132	1356	1592	1469	1075	714	712	2098	1307	944	1325	215	771	796	886	782	1536	1417	997	795	719	1858	1523	911	1284	413	873	690	684	852		925	796	1186	640	968	806	908	1281	754	1297
109	1048	775	1109	1098	1334	904	784	1153	986	1272	1714	1560	1041	678	733	2104	1451	1130	1200	498	710	825	695	703	1460	1499	1055	884	660	2131	1600	881	1215	285	753	735	771	840		866	635	1191	710	1172	879	712	1327	549	1361
110	1010	897	844	833	1579	1038	804	1130	1081	1203	1613	1370	1005	911	737	1999	1558	1094	1221	370	655	588	679	644	1321	1313	921	899	736	2048	1612	719	1050	386	799	715	781	890		917	650	1195	644	1119	988	775	1234	542	1212
111	1148	609	1016	1001	1218	1011	699	1350	1176	1262	1479	1468	1016	819	639	1965	1869	952	1027	361	691	894	769	873	1367	1378	899	812	718	1914	1395	931	1193	346	774	502	793	719		999	809	1191	578	1272	922	644	1160	750	1271
112	896	907	976	974	1623	936	791	1338	922	1359	1501	1407	1026	924	622	2017	1447	1031	1157	312	701	784	616	656	1447	1417	968	804	618	2031	1496	780	1206	194	975	821	744	748		1030	651	1288	785	1346	967	845	1127	744	1202
113	1050	674	920	1051	1495	871	860	1352	1141	1319	1601	1347	963	782	595	1859	1502	908	1087	360	737	727	662	635	1439	1255	1009	802	757	2038	1598	777	1299	309	889	744	788	701		1019	668	1174	714	1590	928	728	1259	572	1260
114	1118	920	1064	1027	1461	1029	983	1155	1044	1356	1478	1092	914	913	808	2138	1634	922	1122	387	798	729	661	675	1330	1223	967	844	627	2033	1612	724	1085	230	858	644	896	759		1173	977	1520	892	1375	958	807	1202	576	1232
115	1149	761	886	964	1341	1022	763	1233	1132	1285	1572	1479	1090	816	674	2000	1661	876	1234	363	888	611	803	660	1588	1343	1050	783	737	1967	1583	945	1343	349	883	577	839	754		1101	856	1335	594	1464	966	808	1406	681	1426
116	966	864	815	1045	1277	1016	925	1242	1063	1336	1432	1349	963	866	592	2047	1505	787	1377	251	667	789	765	651	1476	1222	1025	799	653	1999	1388	872	1124	261	691	581	798	812		1001	754	1164	636	1508	1019	800	1071	669	1332
117	1118	850	1185	1129	1460	974	828	1163	918	1343	1354	1375	1026	852	676	1984	1695	951	1197	376	958	761	712	789	1548	1394	1044	753	713	2028	1630	916	1101	293	815	624	708	649		1015	814	1260	579	1590	897	805	1332	662	1399
118	1061	861	1102	1120	1449	1134	692	1168	950	1322	1648	1286	802	861	684	1930	1670	892	1401	241	709	778	637	662	1355	1241	1038	768	830	2008	1492	943	1190	241	835	718	565	786		1151	691	1306	632	1520	904	786	1400	586	1461
119	1176	741	837	1047	1494	1028	863	1246	820	1301	1672	1419	1106	866	607	1980	1856	1095	1153	345	873	829	759	597	1529	1264	1093	901	549	1938	1448	1008	1083	309	852	734	899	682		899	1027	1427	771	1449	1037	641	1338	742	1263
120	1121	769	906	850	1438	1063	711	1333	1074	1621	1628	1504	951	710	725	1877	1583	1069	1089	493	796	648	844	723	1526	1375	1094	649	609	1831	1710	855	1238	286	826	680	871	910		1104	992	1452	882	1454	1053	798	1342	707	1138
121	1113	745	888	969	1334	1059	856	1327	983	1362	1581	1548	1119	743	755	2240	1565	751	1113	460	784	721	806	548	1275	1318	1140	867	646	1987	1481	884	991	428	835	669	654	815		909	756	1446	921	1430	1076	882	1302	610	1437
122	968	740	842	886	1320	993	705	1134	1146	1236	1404	1529	1048	767	749	1994	1655	776	1287	304	647	679	719	728	1409	1281	1185	1009	663	2039	1546	683	1050	498	713	709	817	782		1012	847	1434	716	1329	1084	788	1361	815	1534
123	1285	852	904	928	1338	1069	744	1335	973	1432	1623	1391	979	779	631	1946	1707	1057	1145	368	827	959	697	590	1370	1227	922	692	633	1973	1613	908	978	486	642	729	843	651		1270	826	1477	898	1474	1117	761	1419	666	1306
124	1066	728	1005	1054	1411	771	1020	1158	1103	1204	1668	1469	971	784	702	2081	1613	1032	1199	326	819	767	801	676	1473	1376	1035	647	607	1969	1712	946	1126	385	763	691	797	868		1161	876	1362	888	1551	859	684	1340	847	1327
125	1078	845	1123	1039	1270	943	895	1288	906	1421	1699	1602	1116	756	732	1971	1653	840	1179	287	730	705	720	722	1539	1394	1080	759	693	1853	1601	921	1081	245	814	708	620	961		1024	949	1049	920	1450	1024	692	1379	822	1404
126	1027	711	849	989	1304	1005	786	1269	1128	1398	1641	1178	1019	733	628	2006	1534	861	1108	350	838	844	758	611	1395	1388	1023	891	645	2008	1744	814	1125	424	878	743	966	936		1104	845	1498	951	1592	987	800	1352	780	1281
127	964	871	995	1004	1127	1026	856	1355	1063	1491	1567	1455	1003	933	822	1966	1703	986	1088	262	779	658	807	754	1415	1537	903	805	740	2105	1536	1038	1110	222	722	822	874	684		1152	1074	1417	896	1540	1112	739	1410	731	1545
128	1093	702	941	1007	1313	1020	841	1365	972	1465	1479	1552	947	930	720	2132	1690	970	1222	347	751	788	668	670	1493	1249	983	870	459	2000	1435	938	1173	391	909	736	782	595		1248	644	1565	1147	1662	1152	899	1648	871	1484
129	1186	833	1153	1024	1493	1099	656	1354	1031	1318	1658	1541	956	835	636	1912	1486	967	995	478	759	713	748	685	1569	1329	951	730	743	2014	1623	825	1191	325	853	596	645	566		1101	983	1415	839	1631	1104	671	1229	899	1579
130	1153	858	922	970	1542	847	971	1253	951	1297	1724	1471	961	899	622	1926	1433	965	1202	404	789	804	825	602	1458	1385	1005	935	697	1897	1710	801	1151	404	928	828	872	876		1169	1129	1609	866	1622	1261	799	1344	843	1515
131	891	864	948	917	1253	875	686	1273	914	1365	1657	1588	1053	801	692	2245	1731	873	1234	458	653	513	828	775	1536	1351	922	708	664	2076	1434	798	1127	320	807	618	860	828		1274	783	1476	889	1628	1145	904	1320	466	1488
132	983	727	1091	1005	1381	910	647	1280	1055	1448	1510	1303	1123	896	621	2033	1537	751	1087	421	767	713	834	709	1443	1393	925	825	614	1789	1544	852	1069	298	757	634	803	842		1183	1097	1539	901	1654	1049	844	1500	751	1580
133	997	899	1019	921	1400	985	591	1311	1202	1369	1653	1401	950	787	649	2070	1708	830	1239	541	696	801	734	788	1362	1417	893	794	724	2072	1579	786	1069	348	806	813	737	874		1367	904	1363	1004	1651	1127	772	1148	693	1488
134	1023	983	1317	1104	1395	954	758	1418	1134	1267	1595	1250	1013	809	613	1932	1424	917	1245	447	813	725	717	785	1436	1410	1018	903	690	1901	1540	720	1092	316	786	696	790	739		1206	902	1647	850	1482	1166	1024	1589	747	1587
135	1069	684	1007	1127	1506	1055	878	1209	745	1306	1614	1478	1121	806	781	1973	1733	1005	1241	300	689	860	825	873	1437	1361	921	736	672	2022	1563	896	1141	310	742	878	627	694		1142	856	1466	804	1455	1193	676	1434	804	1473
136	1124	747	945	1032	1330	1193	828	1163	1086	1524	1612	1495	1144	761	618	2216	1785	1138	1165	331	835	789	715	741	1505	1304	1115	951	674	1952	1573	876	1176	364	758	680	758	735		1384	872	1471	799	1625	990	704	1475	815	1612
137	1221	910	983	945	1470	1080	984	1324	942	1294	1648	1357	798	819	706	2087	1832	922	1280	308	810	671	758	798	1549	1350	922	793	845	2028	1408	871	1210	299	923	666	859	769		1008	768	1496	1029	1478	1293	801	1490	829	1720
138	1028	626	1091	944	1570	1085	888	1074	989	1344	1501	1335	937	842	670	2049	1657	789	1251	259	914	930	813	620	1283	1284	1117	848	658	2068	1558	783	895	340	876	558	654	803		1208	1006	1628	871	1347	1091	540	1467	921	1786
139	1127	729	947	1011	1390	996	736	1093	964	1431	1524	1517	1199	964	553	2081	1654	992	1264	409	754	659	617	888	1426	1288	900	955	762	2017	1563	843	1215	286	819	694	808	702		1169	1111	1513	923	1477	1253	891	1554	822	1762
140	1134	830	871	1100	1345	1105	683	1349	1115	1185	1606	1479	1106	852	840	1920	1376	1155	1024	332	939	663	669	633	1238	1442	915	827	507	2036	1557	932	1356	293	805	909	762	835		1366	1072	1832	971	1539	1185	718	1393	795	1703
141	1217	738	947	1207	1429	1189	899	1071	1062	1340	1702	1524	1006	806	525	2069	1626	966	1065	385	757	649	717	787	1302	1398	985	828	652	2143	1654	659	1133	332	752	814	803	768		1146	1114	1576	1158	1528	1216	776	1518	700	1520
142	971	717	986	1319	1549	911	787	1324	1032	1268	1590	1388	986	875	709	1972	1668	1067	1160	390	819	732	773	732	1445	1509	905	866	714	2029	1497	896	1150	238	668	829	669	657		1316	1034	1520	827	1550	1209	866	1538	846	1744
143	1080	814	987	939	1579	1002	732	1045	932	1276	1613	1530	981	901	669	1901	1473	1086	1162	341	602	592	752	643	1517	1342	989	740	707	1981	1679	899	1288	545	937	715	641	629		1153	1133	1602	753	1406	1167	781	1494	810	1494
144	1141	874	1152	1099	1226	1039	1033	1278	1273	1305	1725	1363	1104	826	718	1975	1545	1058	1118	231	762	757	682	664	1466	1334	1045	967	701	1913	1734	905	1080	290	871	669	548	778		1299	657	1577	884	1529	1133	677	1476	924	1603
145	1037	906	990	1008	1465	1008	883	1211	998	1264	1671	1306	1008	895	785	2041	1590	1045	1199	309	861	628	782	679	1290	1328	886	892	635	1863	1487	978	1133	436	811	578	833	683		1157	1038	1716	812	1428	1146	818	1757	762	1525
146	1140	954	931	965	1498	1049	981	1174	952	1264	1569	1388	988	945	634	1963	1588	1079	1087	464	841	853	639	814	1586	1228	901	774	629	1990	1477	807	1269	263	804	748	661	761		1417	754	1391	828	1522	1146	827	1521	825	1550
147	1313	1034	1045	919	1362	940	868	1276	946	1320	1594	1596	1036	882	772	2099	1518	796	1256	243	935	815	735	743	1229	1398	955	879	744	1998	1695	767	1156	342	729	901	825	724		1186	876	1513	879	1338	1160	1014	1494	729	1707
148	1074	899	873	1008	1301	1178	954	1285	1055	1290	1686	1321	1022	965	667	2051	1645	991	1030	132	1012	712	653	855	1393	1253	918	1010	573	2014	1490	788	1176	332	794	548	823	662		1264	799	1788	998	1467	1251	926	1447	676	1677
149	1044	756	1085	874	1348	1016	789	1354	986	1495	1566	1591	1150	734	753	1902	1566	966	1113	361	576	698	668	743	1638	1414	992	952	585	1658	1611	1060	1255	367	1043	736	861	826		1386	1191	1464	1019	1406	1134	665	1709	835	1432
150	1023	866	865	1034	1401	1094	732	1210	1064	1549	1607	1434	1085	859	594	1867	1385	891	1125	378	726	601	683	776	1412	1180	1043	838	752	2015	1689	843	1133	284	787	815	688	701		1419	746	1676	985	1375	1280	857	1742	754	1500
151	982	881	1068	1031	1445	1174	797	1423	1163	1306	1562	1617	1167	708	676	1925	1640	958	1104	328	778	664	699	689	1448	1381	924	787	628	2014	1441	828	1196	189	891	585	693	832		1269	882	1669	871	1597	1191	885	1580	714	1606
152	1141	966	1171	1006	1315	1009	776	1149	1101	1335	1588	1532	989	911	700	2020	1747	931	968	204	804	722	653	800	1303	1324	1043	764	584	1932	1523	858	1203	204	813	698	706	747		1390	983	1587	898	1102	1116	876	1573	678	1762
153	1049	722	927	886	1217	959	947	1237	1188	1229	1502	1468	989	1020	723	2062	1651	945	1200	384	683	743	663	747	1327	1306	1016	841	572	2085	1541	815	1168	281	665	719	777	732		1118	1154	1483	1087	1448	1173	916	1610	797	1615
154	1086	846	748	1010	1425	888	655	1256	1159	1179	1599	1634	1047	849	428	1987	1599	914	1144	256	696	742	738	859	1482	1355	1092	757	680	2059	1624	800	1102	195	813	818	667	633		1171	595	1568	851	1490	1157	726	1553	869	1617
155	1105	850	825	1081	1303	1090	741	1141	1024	1375	1728	1292	1184	775	751	2113	1292	997	1139	190	700	650	589	717	1506	1252	881	806	699	1753	1502	716	1082	297	633	721	843	771		1073	1014	1532	858	1558	1231	841	1516	811	1651
156	1102	911	1047	1078	1467	990	816	1183	1043	1237	1676	1435	1004	902	594	2088	1465	875	1239	410	780	610	602	646	1201	1443	1063	892	649	2109	1467	918	1078	414	863	733	611	517		1171	1065	1651	850	1483	1140	994	1569	830	1689
157	1075	788	1032	901	1471	1011	886	1285	990	1352	1525	1449	1016	810	735	2025	1622	1045	1120	279	780	826	811	765	1419	1342	1007	864	751	2175	1584	867	1085	395	783	590	742	713		1209	1077	1485	947	1468	1071	843	1548	889	1584
158	1199	960	1065	1285	1244	1200	873	1222	1136	1449	1485	1378	1044	850	591	1872	1539	1002	1027	432	778	827	715	628	1387	1284	1046	931	621	1825	1769	859	1185	308	566	824	726	683		1283	1036	1515	779	1473	1344	832	1538	757	1516
159	1073	886	904	1152	1451	1012	747	1264	1103	1210	1412	1238	1014	830	660	2016	1485	955	1146	263	747	730	608	816	1265	1407	1007	770	671	2005	1818	888	1099	329	859	622	835	682		1157	1140	1740	873	1397	1354	686	1511	806	1564
160	943	888	1067	942	1316	968	827	1249	976	1283	1571	1451	1217	874	768	2099	1451	1013	1175	256	683	695	674	735	1394	1371	973	686	630	1978	1631	884	1038	389	857	723	721	553		1143	1150	1580	964	1488	1205	886	1461	845	1484
161	1030	768	1153	880	1447	1020	847	1405	907	1202	1619	1549	1110	956	621	1910	1652	932	1332	251	808	680	707	665	1381	1416	1076	836	518	1985	1572	897	1227	454	892	619	822	657		1078	752	1614	1037	1533	1355	800	1781	678	1352
162	1001	752	901	1071	1322	1104	976	1300	1052	1393	1582	1495	1124	840	683	1997	1835	763	1135	204	595	601	637	759	1454	1255	953	943	649	2065	1715	796	1069	369	772	813	713	773		1221	995	1515	1112	1511	1157	849	1587	765	1496
163	1201	741	944	961	1346	986	861	1130	961	1402	1624	1420	1104	832	727	2019	1645	966	1202	387	644	746	709	610	1167	1490	950	723	692	2125	1565	763	1169	336	819	772	708	694		1218	796	1696	959	1532	1267	910	1706	669	1606
164	1199	893	1217	1074	1373	819	806	1048	917	1553	1488	1241	1149	795	701	1963	1529	805	1204	475	838	648	892	745	1549	1193	1033	785	697	1857	1819	803	1086	299	737	628	781	641		1206	771	1616	1129	1607	1264	860	1444	599	1660
165	1062	774	974	995	1285	893	849	1175	970	1250	1541	1244	1087	747	627	2127	1552	1074	1099	300	700	763	662	880	1145	1289	866	868	601	1943	1619	874	1050	463	774	847	730	806		1299	1011	1560	890	1541	1372	875	1648	667	1686
166	1038	997	1131	996	1509	956	810	980	898	1298	1525	1343	1089	851	660	1876	1440	1026	1140	320	744	692	811	649	1313	1428	1117	683	691	1901	1686	952	1196	346	731	591	851	772		1234	940	1504	888	1561	1318	982	1660	865	1708
167	1073	895	1063	1050	1308	1058	938	1368	1256	1320	1787	1382	941	766	721	2201	1584	1023	1240	279	806	620	696	731	1339	1454	1032	831	806	2013	1487	1067	1249	208	871	815	700	929		1218	829	1490	808	1495	1231	951	1632	723	1569
168	1226	820	924	930	1503	1070	764	1238	1125	1333	1557	1582	948	808	664	2144	1502	946	959	445	752	551	774	617	1405	1546	927	741	609	1943	1690	878	1135	405	864	650	743	809		1190	930	1659	1166	1655	1289	1000	1795	595	1652
169	1048	676	1042	1177	1405	1201	853	1280	1088	1369	1472	1392	1026	967	667	2023	1777	828	1235	355	727	603	740	818	1429	1398	822	757	685	2038	1817	813	1188	281	760	572	776	764		1190	732	1670	972	1567	1158	911	1520	824	1753
170	1081	701	1049	941	1423	950	769	1231	1151	1161	1642	1589	1166	1076	691	1869	1632	1044	985	430	663	833	582	729	1444	1358	995	839	585	1763	1624	969	976	394	785	716	654	819		1406	862	1601	838	1427	1331	1037	1597	726	1776
171	1049	889	1108	1154	1465	960	895	1054	1071	1427	1663	1242	1082	838	682	2142	1678	829	901	419	548	746	791	779	1487	1343	1036	890	639	1975	1692	917	1357	340	794	726	776	797		1112	888	1583	937	1509	1312	971	1518	714	1833
172	1111	781	1102	1119	1288	1164	901	1266	1039	1458	1533	1185	1001	825	845	2104	1519	869	1273	433	766	665	972	849	1366	1360	1062	795	660	2200	1742	972	1137	562	641	636	845	817		1366	900	1650	916	1640	1200	1084	1852	786	1623
173	1070	836	724	1178	1428	1128	933	1526	1039	1412	1546	1253	997	920	647	2178	1682	858	1270	448	958	666	758	805	1420	1355	961	744	740	2056	1533	961	1038	238	814	662	580	718		1128	981	1549	1131	1503	1339	849	1732	732	1772
174	1057	960	956	943	1264	1080	912	1233	1052	1182	1595	1350	1114	954	630	2013	1661	916	1180	217	803	628	799	815	1226	1428	1016	820	525	2029	1545	1066	1100	440	770	835	740	781		1244	990	1765	848	1376	1176	1078	1551	755	1697
175	1006	691	950	1019	1327	1058	969	1145	1262	1296	1594	1447	1014	835	677	2118	1761	934	1148	248	650	784	629	801	1600	1323	881	805	613	2081	1709	711	1100	370	693	824	755	702		1374	1003	1685	966	1538	1264	1084	1591	665	1903
176	1117	799	954	963	1368	1173	764	1213	1093	1241	1624	1259	1073	846	614	1903	1464	1014	1191	256	666	743	633	816	1356	1542	1070	800	600	2019	1402	743	1157	379	742	690	689	820		1103	1159	1701	1115	1622	1255	781	1642	765	1843
177	963	753	939	1045	1350	1133	921	1315	1042	1216	1511	1516	1035	859	675	2069	1518	773	995	412	820	740	605	751	1444	1333	919	685	761	2028	1566	1046	1189	286	821	654	704	688		1081	1053	1778	987	1584	1223	905	1723	868	1787
178	1222	875	1060	898	1515	911	899	1372	1131	1394	1493	1274	1003	761	618	2068	1495	921	1102	481	913	736	741	774	1571	1261	927	943	766	1905	1715	908	1193	309	713	712	914	828		1232	688	1563	1149	1506	1168	1201	1497	718	1720
179	1079	739	999	866	1349	879	927	1287	1254	1236	1583	1232	987	803	621	1894	1771	871	982	375	763	880	714	624	1595	1377	989	719	796	2018	1764	963	1103	347	794	781	799	799		1178	1001	1689	992	1582	1311	1142	1565	790	1659
180	1188	898	921	886	1313	1077	906	1145	929	1271	1542	1497	1059	842	655	2089	1545	1132	1047	410	703	711	787	825	1320	1357	843	774	693	1968	1744	961	1155	201	788	684	618	705		1288	995	1765	934	1492	1058	898	1539	947	1898
181	1019	358	861	1376	1379	929	843	1182	1088	1399	1488	1376	1060	892	714	2133	1669	815	1173	293	881	745	770	670	1299	1240	1109	899	749	2143	1712	887	1229	416	669	553	680	487		1173	989	1506	838	1543	1142	1160	1611	638	1630
182	1077	758	797	1165	1631	1070	714	1078	1259	1202	1541	1383	1085	796	654	1931	1471	968	1095	411	765	731	767	675	1600	1323	1037	1012	568	1883	1671	1082	1157	352	920	554	738	750		1110	1161	1478	825	1478	1224	967	1683	734	1614
183	873	818	815	1137	1325	948	806	1353	870	1206	1661	1631	1006	845	629	1995	1515	897	1090	399	749	861	779	833	1387	1171	1176	803	600	2004	1541	744	1326	479	739	635	816	860		1269	1027	1636	696	1710	1072	1193	1384	693	1703
184	1226	792	1072	987	1391	950	804	1241	1071	1317	1745	1364	1071	768	729	2026	1548	884	1189	356	934	784	831	721	1298	1318	892	826	677	2025	1584	838	1228	247	660	739	853	618		1378	717	1784	1013	1479	1251	1081	1786	796	1637
185	1183	589	981	1010	1165	1030	793	1321	874	1505	1608	1487	975	823	569	1998	1422	1087	1023	295	597	607	776	792	1542	1410	1057	847	753	1867	1516	991	1127	340	746	638	792	652		1176	1021	1716	835	1386	1333	1072	1571	711	1780
186	1145	932	1049	941	1285	1016	978	1366	912	1551	1344	1358	1025	902	679	1719	1387	977	1116	285	759	710	675	895	1369	1387	913	793	766	1872	1817	996	1171	130	833	712	635	597		1176	977	1696	809	1681	1207	825	1541	752	1578
187	1109	833	917	1098	1451	905	767	1351	973	1494	1620	1638	970	876	829	1949	1792	789	1105	312	724	613	757	622	1487	1418	923	921	741	2029	1654	774	1298	204	714	828	562	755		1258	1062	1665	803	1753	1104	1171	1604	634	1870
188	1156	815	1015	997	1394	1001	789	1213	1084	1436	1637	1303	1071	903	599	1907	1656	811	1118	272	806	750	745	620	1385	1287	957	780	718	1874	1676	993	1158	390	776	961	801	549		1249	1007	1624	840	1741	1347	978	1606	645	1853
189	1228	809	1164	1026	1320	1101	853	1202	1118	1374	1600	1257	1035	806	963	2192	1724	816	1048	237	820	626	675	794	1719	1316	825	799	713	1800	1659	852	1207	349	819	635	687	760		1162	984	1658	853	1397	1241	942	1656	935	1477
190	1302	815	1134	907	1466	1229	1017	1184	1127	1211	1448	1484	1183	858	741	2099	1794	1035	1232	337	688	657	705	848	1358	1380	893	954	573	2020	1545	864	1227	335	721	799	766	794		1158	911	1617	891	1407	1177	1100	1483	753	1721
191	1052	829	965	1086	1276	985	995	1286	916	1304	1603	1401	832	888	686	1941	1576	1171	1229	573	861	651	754	814	1569	1407	992	859	668	2173	1615	1013	994	362	839	697	740	776		1127	1091	1476	911	1536	1202	987	1607	714	1748
192	1107	725	1085	962	1390	883	935	1484	1034	1133	1604	1581	909	898	723	2007	1861	963	1040	184	761	725	634	634	1414	1369	957	868	667	2015	1691	658	1226	423	752	853	747	664		1172	1060	1494	869	1500	1114	1271	1356	828	1623
193	991	846	1020	998	1083	1027	829	1169	1007	1305	1654	1492	1095	851	779	1961	1606	933	1021	324	804	576	823	765	1514	1179	990	906	596	1971	1579	721	1368	359	746	687	670	725		1211	884	1687	760	1492	1115	784	1339	679	1683
194	1224	801	1010	1017	1333	1055	678	1133	1184	1165	1535	1267	1001	751	716	1947	1760	823	1137	491	772	648	713	845	1337	1375	1049	880	562	1921	1373	988	1028	409	683	608	691	730		1285	760	1696	921	1450	1046	825	1544	765	1731
195	1065	883	938	1084	1254	985	980	1149	1184	1287	1385	1449	1069	734	612	2060	1570	967	1149	302	756	706	726	786	1246	1235	1004	756	719	1826	1450	807	1234	287	730	644	710	647		1412	1055	1449	856	1547	1119	989	1451	731	1747
196	1225	900	1000	1228	1318	1026	920	1308	941	1385	1704	1345	1002	757	653	2043	1782	832	1130	340	671	736	774	833	1345	1292	1043	799	673	1997	1531	819	1230	190	861	622	639	636		1067	858	1464	1001	1503	1195	910	1638	776	1389
197	1051	809	884	1048	1544	975	957	1276	1152	1386	1519	1399	1004	880	754	2026	1467	922	1112	361	706	668	702	717	1362	1422	1001	777	628	1911	1597	651	1154	529	734	635	821	813		1338	973	1585	1013	1478	1244	937	1500	695	1558
198	1092	753	894	1033	1280	983	889	1220	1126	1297	1595	1195	1053	848	649	1893	1307	1014	980	290	709	813	700	800	1334	1289	959	718	737	1743	1596	818	1160	281	706	609	672	759		975	782	1677	897	1423	1196	1084	1619	754	1681
199	1054	939	992	920	1309	939	775	1189	1092	1397	1434	1383	901	859	642	2060	1583	941	1187	352	808	574	787	760	1529	1296	937	835	751	2102	1658	957	1096	315	803	726	733	823		1292	863	1811	885	1529	1248	1006	1268	714	1560
200	916	802	921	1073	1347	1036	884	1254	982	1244	1581	1246	1071	858	521	1989	1562	954	1191	339	711	734	857	823	1553	1270	936	757	659	1996	1616	899	1313	380	788	558	850	642		1162	742	1542	949	1708	1009	1007	1384	798	1806
201	986	792	959	944	1201	1020	786	1241	1058	1264	1719	1293	1000	853	723	2019	1530	863	1197	246	937	720	779	733	1328	1467	851	808	655	2051	1667	738	1268	229	708	670	882	824		1076	724	1698	761	1555	1132	931	1522	770	1687
202	1203	937	1032	1060	1298	964	681	1392	1263	1455	1563	1321	925	719	672	1971	1529	1081	1115	328	865	782	754	751	1366	1347	1038	908	747	1992	1564	880	1169	405	864	661	888	645		970	684	1565	1030	1236	1142	1033	1357	554	1502
203	1073	824	926	1025	1277	1141	939	1199	930	1511	1625	1589	815	711	754	1867	1481	831	1115	312	813	599	651	532	1538	1454	1191	831	772	1997	1517	929	1029	385	689	597	775	642		1170	1238	1391	883	1597	1273	818	1488	779	1450
204	1092	809	1016	929	1466	1052	887	1412	1125	1392	1622	1469	1182	919	756	2078	1557	1148	1047	353	575	872	643	741	1646	1300	1066	836	724	1961	1634	946	1082	257	926	621	656	681		1136	918	1547	770	1473	1158	891	1611	847	1581
205	1102	725	921	1049	1147	1111	804	1264	940	1270	1457	1439	1082	946	612	1971	1500	805	1234	457	740	696	626	530	1470	1323	944	678	554	2059	1569	913	1203	281	737	685	713	636		1183	911	1903	861	1636	1115	852	1525	669	1713
206	1199	753	1126	978	1226	1048	889	1156	1225	1409	1541	1386	1110	824	745	1928	1730	804	1065	389	652	747	763	747	1428	1301	937	873	614	2076	1723	867	1062	299	898	574	591	785		1203	761	1574	1008	1492	1215	940	1694	793	1678
207	1100	934	1248	1056	1499	1233	940	1188	1004	1307	1458	1586	933	848	668	1913	1365	918	1108	301	702	711	642	743	1342	1472	772	754	730	1988	1690	834	1158	356	742	703	867	687		1133	824	1675	958	1569	1235	800	1444	670	1568
208	1079	684	1275	1098	1304	974	763	1284	1175	1328	1688	1499	865	951	668	2024	1499	1086	821	389	750	664	796	941	1596	1462	1026	824	622	1847	1652	829	1102	411	816	801	796	806		1064	788	1559	771	1532	1132	956	1535	855	1529
209	889	849	1251	1095	1409	1159	783	1407	1060	1359	1591	1404	996	742	739	1909	1474	879	964	390	768	668	805	928	1462	1448	995	713	661	1833	1747	945	962	205	760	796	858	684		1015	961	1572	943	1657	1117	996	1516	779	1355
210	1226	1050	1287	935	1435	1033	772	1210	1072	1506	1467	1519	990	751	651	2182	1728	793	1207	519	958	853	825	819	1329	1315	861	822	729	1802	1659	894	1087	378	680	660	832	827		1053	1021	1399	928	1466	1118	955	1396	883	1670
211	1120	841	1313	1116	1323	1103	1022	1265	1188	1251	1453	1186	1045	743	595	2192	1701	1107	910	332	899	792	776	785	1509	1379	968	937	731	2030	1481	791	1049	223	849	727	841	845		1239	715	1565	833	1552	1214	953	1512	715	1575
212	1143	867	1308	1204	1356	1170	814	1300	1018	1180	1558	1570	1026	813	786	1855	1530	979	1190	400	569	655	748	768	1330	1362	1001	861	677	1927	1552	760	1045	427	883	585	889	788		1105	900	1576	930	1296	1121	894	1402	655	1610
213	1117	863	1309	1065	1289	1082	875	1377	1057	1201	1472	1264	994	777	510	2259	1555	859	1044	257	820	665	817	837	1329	1301	860	871	722	1942	1466	689	1122	245	859	605	751	738		1114	646	1550	898	1340	1098	883	1484	738	1487
214	1166	848	1150	1135	1402	984	787	1348	1151	1416	1457	1283	1053	929	578	1956	1702	1019	1183	398	695	756	586	693	1453	1362	949	837	609	1925	1596	1080	1341	355	755	591	699	876		1023	772	1435	811	1410	1059	737	1455	705	1706
215	1140	895	1117	946	1180	1272	708	1297	1082	1326	1538	1336	1055	949	792	2087	1664	894	1251	349	887	719	809	895	1515	1377	948	769	674	1955	1919	815	1109	281	780	831	766	640		875	705	1606	872	1385	1098	916	1658	743	1681
216	954	905	1348	974	1373	1001	1030	1306	1043	1354	1521	1524	1005	706	697	2017	1646	871	1050	284	885	646	629	696	1478	1305	972	700	618	1907	1706	864	1163	290	713	761	666	782		1125	963	1495	920	1228	1107	902	1443	774	1403
217	1142	883	1238	1132	1226	1020	725	1181	1038	1239	1609	1368	919	801	687	1969	1570	783	1090	372	994	789	676	727	1437	1298	957	831	694	1993	1510	883	1266	406	832	586	730	901		1200	465	1403	906	1432	1102	727	1244	600	1550
218	1009	992	1267	951	1402	998	772	1371	1034	1414	1623	1248	1007	836	715	2038	1432	983	1076	367	923	942	854	869	1378	1181	906	771	682	1950	1457	920	1193	282	764	719	722	724		1045	751	1352	750	1512	1048	919	1505	676	1485
219	959	813	1313	1215	1289	1091	857	1305	1178	1425	1475	1355	945	814	743	2118	1572	937	1012	222	899	603	772	724	1404	1467	899	746	766	1943	1658	916	1152	223	844	622	846	795		975	967	1464	774	1249	1169	835	1468	586	1556
220	1017	729	1231	969	1383	1226	1068	1406	909	1492	1725	1547	1012	813	615	1996	1571	999	1306	518	930	764	710	825	1556	1465	882	917	621	2017	1543	863	1268	255	710	626	593	786		1000	898	1587	874	1326	992	906	1405	705	1566
221	998	745	1181	1064	1422	1140	788	1273	1088	1401	1518	1351	979	911	601	1930	1716	858	1034	321	606	817	829	613	1442	1450	1063	774	683	2006	1857	784	972	290	948	825	572	867		952	850	1250	809	1460	958	694	1292	745	1258
222	1240	973	1443	1009	1376	1065	850	1248	1125	1182	1585	1460	1027	848	705	2040	1579	843	1014	415	845	565	875	844	1280	1208	911	770	685	2035	1544	932	1192	351	789	712	726	844		1097	665	1474	727	1426	1004	880	1238	503	1361
223	1063	620	1233	889	1165	1013	858	1329	1098	1281	1529	1744	935	840	658	1856	1734	812	1126	405	653	825	778	675	1453	1310	928	729	729	2017	1557	836	1214	308	713	776	766	804		977	957	1536	771	1350	1063	612	1326	665	1335
224	1219	725	1365	1069	1223	1151	764	1312	1127	1191	1589	1598	902	883	533	1965	1821	977	1078	309	824	683	729	849	1538	1438	847	790	602	2198	1567	982	1094	439	610	753	824	671		1039	681	1360	921	1395	980	816	1284	584	1343
225	1022	749	1391	994	1437	1038	654	1213	1166	1571	1557	1294	999	823	758	2019	1503	963	1007	306	762	677	737	823	1717	1274	931	723	717	2063	1584	990	1006	328	646	725	781	860		922	953	1351	612	1310	942	845	1272	664	1338
226	1039	1043	1402	1027	1271	964	770	1234	1163	1388	1474	1473	980	786	773	1858	1589	986	1149	396	748	744	618	612	1678	1389	965	897	747	1914	1498	883	1226	381	887	611	864	743		824	731	1306	925	1310	897	732	1202	704	1415
227	1161	861	1252	1084	1240	1139	972	1223	1253	1370	1632	1410	998	938	632	2027	1485	968	1054	356	863	717	648	814	1615	1314	1182	916	641	2006	1607	884	1135	199	872	878	769	783		963	731	1342	684	1425	870	610	1301	528	1505
228	975	860	1164	1027	1183	1056	799	1101	1007	1341	1421	1644	845	885	609	1859	1654	1044	1117	245	738	672	761	749	1485	1531	952	775	684	1933	1606	898	1190	307	878	764	782	667		1060	545	1268	758	1237	1039	658	1197	546	1256
229	1225	742	1167	1100	1375	1097	778	1220	978	1293	1365	1189	964	636	606	2099	1536	900	1057	439	935	688	738	940	1529	1317	912	965	724	2044	1520	864	992	316	808	777	824	766		950	934	1071	837	1389	970	782	1155	608	1324
230	1219	894	1213	1218	1216	1182	657	1183	1255	1206	1676	1454	867	800	647	2132	1846	874	1172	417	716	742	897	666	1595	1329	846	854	708	2001	1589	913	1173	344	731	796	858	732		1042	673	1465	706	1283	1045	772	1288	487	1513
231	1081	750	1185	1083	1411	1092	694	1208	1174	1411	1511	1411	949	885	699	1982	1756	1034	997	333	707	512	703	833	1538	1369	859	836	598	1909	1623	706	1355	222	779	658	696	810		1099	764	1299	627	1211	913	769	1287	566	1294
232	969	926	1423	1055	1336	980	677	1374	1180	1260	1587	1339	1008	873	669	2135	1538	838	1141	272	708	757	707	818	1504	1540	1093	752	681	1957	1541	865	1152	227	836	578	882	793		974	598	1321	923	1322	1031	908	1363	610	1152
233	1071	771	1187	1244	1396	889	984	1329	1115	1248	1618	1477	931	861	526	2049	1628	937	885	360	924	751	822	693	1461	1457	797	795	604	1923	1658	789	1147	331	785	710	743	763		761	850	1356	605	1283	1018	856	1430	531	1419
234	1061	856	1263	1003	1473	1002	843	1360	1086	1351	1561	1496	837	783	687	1980	1490	816	979	398	784	593	807	685	1596	1391	1109	825	678	2075	1496	754	1164	256	701	767	653	760		1087	893	1401	796	1329	1075	726	1258	557	1376
235	1101	920	1217	1003	1262	1143	835	1273	1043	1098	1613	1334	954	830	564	2113	1625	878	1317	261	834	754	701	925	1611	1556	896	746	715	2046	1616	875	1243	324	925	604	587	682		895	884	1107	983	1251	984	880	1395	557	1292
236	999	626	1249	1116	1254	1140	892	1402	1240	1449	1597	1201	924	939	602	2030	1636	930	760	341	910	618	518	895	1527	1335	931	828	604	2053	1641	715	957	424	859	619	685	944		987	968	1295	929	1187	1014	796	1231	482	1250
237	1142	779	1192	1118	1355	1048	862	1248	1185	1168	1531	1422	1023	871	721	2066	1683	877	1027	370	611	759	758	726	1434	1316	944	857	641	1867	1713	858	1052	389	686	771	838	603		902	715	1312	713	1003	1116	695	1207	446	1191
238	1163	741	1242	1152	1337	1060	861	1346	962	1259	1473	1423	923	767	786	2026	1584	1054	1059	289	663	686	943	619	1494	1369	980	833	610	1785	1688	771	1215	248	823	757	678	723		886	669	1219	725	1247	1067	663	1239	556	1355
239	1116	811	1332	1066	1421	939	766	1264	892	1191	1508	1427	876	753	800	1771	1483	924	1184	479	810	691	692	834	1506	1332	907	795	687	2090	1563	922	982	417	791	598	628	835		965	682	1447	831	1299	1042	794	1280	508	1131
240	1201	669	1362	1001	1330	1246	848	1098	1087	1417	1503	1303	964	779	590	2067	1692	960	1062	357	847	663	743	635	1362	1278	1122	730	750	1910	1612	933	1149	284	813	733	761	699		981	673	1251	786	1389	1125	725	1242	554	1365
241	1080	1032	1218	972	1290	1148	631	1069	920	1282	1520	1411	962	928	799	1881	1503	1104	1148	378	706	814	734	784	1590	1577	983	832	681	1984	1542	874	1070	308	784	751	745	798		750	975	1112	238	1410	1026	794	1260	575	1280
242	1154	792	1264	780	1360	951	746	1280	1154	1197	1635	1381	998	803	602	1923	1416	810	1080	369	737	853	648	631	1566	1414	986	775	714	2045	1731	880	1402	354	973	602	704	727		1116	657	1221	532	1247	988	898	1032	594	1365
243	1237	776	1309	1091	1291	1126	875	1225	1071	1133	1470	1397	912	828	714	1904	1464	823	1258	321	706	816	634	862	1455	1308	997	783	610	1948	1363	716	1227	344	804	702	645	768		1029	689	870	580	1201	1025	785	1309	571	1317
244	1156	939	1248	897	1327	982	831	1270	1232	1329	1493	1328	959	806	604	2049	1474	992	1138	370	737	618	765	617	1681	1461	1067	811	607	1913	1644	749	1109	323	836	803	870	725		1030	722	1321	551	1084	959	917	1289	447	1341
245	1059	839	1445	1153	1266	1015	935	1337	1020	1273	1467	1252	962	781	566	2074	1264	907	1147	396	863	824	542	766	1517	1443	1123	881	591	1925	1463	854	1200	382	796	623	641	837		991	680	1166	563	1196	806	668	1287	801	1243
246	808	923	1241	975	1373	1107	861	1377	1021	1257	1633	1475	1116	645	665	2021	1595	885	1128	346	883	599	772	798	1422	1280	851	845	696	1874	1623	627	1034	448	833	701	728	719		982	602	1321	670	1197	1015	685	1246	504	1347
247	1135	906	1158	1042	1218	1172	798	1161	989	1283	1522	1646	1000	746	613	1988	1615	892	1068	265	702	615	730	738	1400	1379	962	777	575	1929	1567	906	1190	308	831	752	885	846		938	705	1380	689	1016	977	576	1197	707	1202
248	1126	842	1129	1115	1335	911	859	1125	966	1274	1559	1465	978	813	722	1859	1533	973	1211	460	786	823	800	831	1531	1424	956	838	593	1981	1673	884	1137	197	732	859	632	775		1105	651	1460	555	1265	896	758	1074	538	1358
249	1195	720	1246	1043	1377	1081	945	1133	1176	1334	1398	1343	952	807	583	1919	1412	1037	1055	444	768	759	900	879	1547	1288	1087	857	727	2091	1800	1038	1257	335	895	664	633	805		940	607	1300	570	1212	843	656	1205	445	1208
250	1136	786	1170	1060	1275	1039	858	1384	1063	1340	1464	1384	1014	820	654	1904	1531	831	1127	486	692	744	774	750	1508	1306	950	804	618	2171	1638	814	1074	241	639	672	692	880		980	685	1350	630	1285	883	816	1320	574	1185
251	1328	913	1242	927	1333	926	989	1153	1005	1483	1547	1430	1017	775	619	2067	1567	983	1136	381	719	774	689	603	1583	1441	955	878	659	2133	1558	859	1185	335	724	493	853	875		1110	738	1282	556	1165	990	1097	1141	494	1283
252	1176	764	1331	1003	1322	1116	607	1289	1195	1287	1570	1321	984	785	566	1994	1664	817	1074	392	769	777	774	792	1564	1445	924	836	713	1984	1531	738	1342	131	841	734	895	780		937	825	1455	784	1088	995	564	1183	588	1371
253	1129	755	1332	1250	1179	1119	793	1239	981	1381	1427	1340	939	730	553	1897	1622	820	1089	500	700	731	757	681	1500	1287	1023	869	721	1975	1616	796	1092	424	790	873	773	803		970	896	1180	830	990	946	673	1404	504	1194
254	969	758	1209	1026	1260	739	751	1309	1079	1410	1647	1399	887	796	609	2052	1531	774	1116	244	731	595	853	780	1529	1300	963	742	637	1976	1701	736	1165	263	743	709	714	782		945	827	1225	660	1067	932	903	1093	555	1321
255	1049	915	1302	1205	1512	869	839	1319	973	1255	1553	1348	1017	803	607	2016	1563	939	1186	292	922	758	852	748	1406	1483	970	827	752	2088	1539	853	1156	294	745	768	729	778		957	885	1595	623	1273	1131	705	1322	434	1156
256	1203	821	1146	1144	1299	1154	793	1233	1265	1513	1482	1518	1073	896	710	1984	1695	921	1100	399	576	701	793	836	1511	1329	973	807	739	2132	1649	887	1142	242	893	643	747	668		1051	651	1281	736	1111	926	688	1343	495	1254
257	1118	835	1280	1004	1456	1062	786	1231	1253	1355	1522	1298	973	906	550	2085	1643	962	1003	439	844	578	690	886	1562	1257	1145	746	543	1929	1625	863	1298	406	804	693	587	797		1070	797	1435	763	1327	1051	935	1135	495	1258
258	1206	809	1344	1000	1382	1084	893	1464	1159	1435	1499	1315	1095	754	533	2002	1636	904	1138	314	910	907	807	730	1755	1302	971	877	588	1949	1549	786	1040	431	796	670	898	693		898	808	1235	640	1278	892	849	1110	353	1425
259	1189	792	1229	1041	1363	1042	952	1347	1148	1415	1539	1319	1070	792	718	2065	1494	853	1005	331	739	768	727	873	1540	1323	1112	850	552	1899	1676	926	1058	207	627	606	787	969		931	992	1407	550	1263	892	454	1087	609	1175
260	1104	770	1282	936	1353	1078	858	1313	1257	1361	1532	1303	984	738	715	2043	1532	1032	1214	382	819	857	919	818	1508	1664	1085	776	603	2088	1671	882	1132	388	778	797	614	621		975	756	1314	708	1021	965	804	1069	534	1345
261	1154	768	1199	1151	1257	883	833	1177	984	1256	1647	1224	917	902	666	1955	1451	931	1154	254	780	906	827	815	1356	1270	1032	754	535	1999	1601	895	1006	410	761	576	709	749		881	830	1319	758	1422	1038	702	975	551	1218
262	1183	811	1235	1090	1379	1005	833	1185	984	1368	1567	1291	974	897	780	1920	1588	981	1121	329	840	656	708	774	1478	1252	941	780	776	1869	1557	944	1194	395	679	631	737	836		804	764	1283	642	1228	945	708	1221	515	1219
263	1203	970	1355	978	1264	1084	794	1319	1109	1154	1562	1432	1072	927	656	1960	1640	889	1008	254	938	613	714	748	1604	1317	991	882	716	2017	1618	913	1261	315	968	798	595	611		1080	701	1268	652	1196	930	855	1393	683	1186
264	1225	631	1196	1007	1364	1025	739	1172	1111	1346	1470	1430	859	791	652	1989	1838	1012	1095	310	637	656	851	683	1476	1284	980	841	666	1959	1610	936	1181	366	763	728	804	746		978	758	1209	590	1083	1095	757	1231	551	1150
265	1100	696	1175	1133	1274	1136	793	1481	1053	1402	1594	1592	990	803	600	2095	1720	855	1367	361	792	666	655	873	1499	1374	943	808	627	2058	1522	854	1041	212	673	780	821	665		860	609	1302	657	1089	921	887	1373	575	1477
266	1084	804	1299	1141	1213	990	939	1334	1038	1391	1653	1227	1063	937	661	1997	1538	1040	954	169	677	721	697	801	1221	1282	948	775	602	1941	1625	952	1125	346	795	719	811	736		992	693	1240	635	1097	1023	982	1087	585	1413
267	941	831	1313	1037	1196	1083	832	1240	1195	1054	1563	1351	1013	672	570	1857	1702	976	1045	313	699	700	881	760	1417	1350	1003	760	646	2006	1564	886	1029	311	738	667	556	707		778	665	1329	610	1439	952	832	1109	439	998
268	1130	793	1486	997	1317	1146	811	1499	1000	1324	1571	1379	987	955	652	2118	1582	884	1209	343	879	636	719	745	1525	1187	1024	769	580	1868	1534	749	1155	379	822	821	755	660		911	569	1365	525	1157	1002	855	1198	565	1187
269	1105	904	1316	1248	1385	1122	849	1344	1194	1465	1624	1386	845	851	683	1980	1624	1113	1017	414	735	788	784	564	1544	1459	1047	909	691	2032	1623	737	1171	327	846	696	764	825		870	885	1209	686	1272	925	679	1302	543	1128
270	1039	843	1396	981	1426	1093	629	1301	1223	1484	1278	1338	1114	900	636	1951	1687	916	1055	279	893	617	841	737	1492	1314	1022	729	631	1845	1602	729	1218	295	902	696	806	587		935	475	1410	645	1127	1187	643	1179	609	1090
271	1097	982	1266	856	1406	889	752	1373	1016	1308	1306	1587	930	759	717	1948	1827	761	1024	371	715	809	729	759	1438	1265	956	893	634	2116	1686	786	1047	195	703	576	770	825		1017	713	1225	758	1096	1112	805	946	335	1281
272	1071	873	1288	1005	1285	1027	971	1335	1029	1210	1581	1616	989	821	736	1929	1653	1068	1118	289	714	759	669	778	1517	1441	1033	848	657	2090	1608	918	1159	404	859	680	750	707		982	620	1322	620	1196	1121	846	1267	465	1263
273	1007	892	1203	1055	1283	1148	826	1441	1027	1319	1492	1161	1066	810	655	2051	1625	1085	1235	534	690	694	722	671	1646	1180	1007	844	621	1955	1713	941	1173	211	646	645	744	785		848	726	1202	585	1200	897	892	1173	501	1201
274	992	778	1218	997	1382	958	753	1242	1097	1412	1559	1182	1010	750	630	1899	1614	1013	1053	284	572	694	885	655	1482	1321	920	818	648	2052	1848	915	1130	279	785	621	797	835		984	878	1471	757	1094	1013	771	1242	541	1301
275	1063	714	1247	981	1249	1078	885	1347	1048	1364	1565	1202	1091	729	661	1865	1738	1033	1218	445	566	697	722	812	1428	1545	1109	794	733	1851	1583	735	940	349	766	731	743	790		979	625	1315	544	1194	941	742	1084	545	1307
276	1014	806	1108	1080	1339	1051	676	1517	1102	1384	1593	1281	1035	929	500	2135	1633	1045	1286	306	701	656	764	797	1448	1361	785	641	621	1831	1560	993	1254	392	718	726	719	1115		1011	835	1141	669	1289	962	667	1283	452	1232
277	934	947	1181	1090	1109	1140	803	1303	1302	1169	1463	1380	875	791	718	1895	1740	907	1170	293	621	679	745	773	1529	1284	862	938	627	1950	1547	828	1110	431	940	757	816	634		948	631	1258	726	1203	1081	835	1222	539	1177
278	1180	741	1311	911	1307	1050	763	1358	1023	1429	1526	1423	867	708	766	2106	1378	978	1152	345	778	697	845	748	1576	1268	1003	808	604	1816	1605	865	974	333	675	706	749	781		1143	739	1235	609	1015	1026	851	1178	345	1360
279	1028	895	1291	1039	1362	1163	736	1289	1209	1293	1675	1463	893	882	679	2001	1786	908	1086	330	741	821	770	796	1541	1317	1075	897	813	1876	1643	931	1157	319	944	620	745	795		881	593	1239	617	997	927	768	1192	431	1202
280	1171	785	1218	1068	1370	1196	706	1558	1219	1270	1491	1343	1072	787	732	1957	1865	893	948	377	748	781	857	748	1488	1473	1025	712	663	1995	1491	1040	1120	268	915	923	766	807		1147	782	1348	618	1142	1113	658	1104	506	1178
281	1051	868	1334	988	1427	1134	719	1315	1166	1357	1497	1430	1113	906	777	1961	1475	743	1182	328	689	713	745	832	1570	1273	1051	891	648	2056	1588	739	1306	396	957	590	634	635		802	507	1264	475	1273	995	773	1300	390	1386
282	1072	739	1289	928	1473	1151	853	1197	991	1243	1649	1316	984	818	693	2136	1535	676	1071	257	826	559	835	887	1440	1321	969	767	711	2040	1625	788	1144	343	888	790	797	869		1105	656	1269	693	1029	1085	706	1215	440	1330
283	1043	823	1234	1061	1427	1073	747	1353	1165	1346	1493	1599	1028	808	545	1989	1879	755	1318	250	657	619	876	692	1390	1399	982	811	571	1988	1561	875	1284	406	704	694	855	907		934	789	1351	792	1039	916	562	1080	337	1328
284	1046	756	1286	1007	1545	1072	840	1303	1153	1177	1512	1395	995	895	597	1999	1588	973	1061	382	837	760	675	864	1542	1389	1012	905	807	1986	1569	910	1220	384	682	692	722	881		1018	961	1142	549	946	929	748	1121	424	1324
285	1129	995	1228	1139	1410	1038	625	1434	1227	1476	1525	1269	960	886	700	2016	1527	973	1109	291	730	737	734	841	1296	1310	886	834	706	1976	1703	929	1203	310	700	675	702	799		1057	675	1327	787	1251	821	763	1137	507	1181
286	1238	649	1222	1024	1437	1099	768	1475	1147	1421	1534	1324	861	769	680	1981	1544	1083	1183	342	792	672	888	401	1466	1404	979	796	582	1865	1665	832	1394	234	613	568	598	858		896	825	1349	694	1279	899	580	1207	428	1182
287	1050	844	1479	873	1212	1013	776	1405	1095	1278	1566	1430	1156	804	640	1858	1651	976	1097	395	973	608	767	763	1568	1423	867	824	765	1959	1564	817	1203	411	798	531	930	993		921	869	1306	735	1348	813	693	1222	561	1309
288	1055	739	1584	932	1288	956	896	1237	1060	1341	1590	1419	1015	841	786	1685	1472	899	1220	286	700	698	781	930	1452	1303	919	822	638	1901	1531	865	1202	465	745	757	562	876		991	942	1309	734	1173	955	722	1249	555	1180
289	1046	971	1310	993	1334	1115	765	1430	1087	1439	1602	1271	1028	842	655	1911	1438	1192	1061	285	609	646	809	790	1571	1234	1070	835	638	1909	1543	910	1111	266	876	718	653	707		1009	934	1284	613	1036	1137	629	1113	441	1249
290	1257	920	1335	1068	1443	1091	1155	1394	1251	1410	1460	1186	1103	902	546	2047	1666	762	1155	204	731	694	710	885	1499	1448	969	916	749	1912	1550	822	1219	467	616	642	687	773		1062	890	1419	850	1136	1043	872	1332	499	1263
291	1034	786	1395	924	1291	1182	811	1244	1165	1369	1569	1553	1126	702	752	2037	1510	981	1212	367	904	624	736	869	1514	1455	920	910	525	2015	1789	968	1155	419	628	664	753	634		969	662	1224	827	1039	923	534	1055	395	1230
292	1098	951	1234	972	1271	1044	877	1304	1218	1182	1463	1101	1004	962	722	2131	1621	1046	1058	442	787	802	788	763	1418	1388	1074	919	688	2068	1625	775	1145	298	698	722	772	737		1040	866	1314	562	1283	905	813	1256	435	1305
293	1171	807	1300	1074	1306	1169	830	1301	1082	1254	1609	1491	998	797	793	1997	1480	889	1226	406	748	690	738	615	1533	1300	908	843	647	2002	1517	860	1189	488	898	720	653	792		911	669	1348	609	1117	1079	651	1253	414	1325
294	1255	962	1266	1140	1280	1253	911	1302	1318	1363	1590	1219	1042	866	753	1791	1541	913	1114	110	703	653	622	786	1612	1242	1093	891	676	2038	1640	843	1254	281	889	754	667	763		1030	594	1430	845	1239	1095	795	1015	477	1189
295	1068	782	1464	1068	1389	1016	922	1399	1218	1510	1521	1236	1098	904	726	1885	1648	961	1022	352	703	742	692	821	1543	1213	899	643	753	1861	1666	754	1146	516	802	690	685	1016		935	693	1345	718	1063	849	589	1381	608	1158
296	997	684	1269	1071	1228	1059	867	1353	1204	1325	1678	1326	1038	757	740	2102	1884	1050	1134	271	795	615	865	724	1500	1364	975	939	714	2072	1573	1022	1129	488	660	672	787	776		983	985	1087	736	1446	926	679	1356	583	1312
297	1278	792	1326	1185	1408	1131	755	1277	987	1307	1471	1250	1128	895	706	1992	1541	830	953	333	796	468	665	898	1702	1319	979	947	685	1890	1534	1005	1129	266	961	797	628	1014		854	620	1117	701	1187	851	816	1056	367	1132
298	1207	767	1299	988	1360	1022	960	1381	969	1466	1490	1336	1032	844	742	2039	1645	945	1158	333	816	659	863	821	1564	1361	1029	844	602	2030	1580	925	1085	415	868	724	724	805		901	613	1308	682	1181	996	750	1223	481	1250
299	1036	764	1256	1048	986	986	916	1278	1272	1143	1630	1477	1010	889	656	2035	1793	809	1046	295	872	626	536	692	1622	1253	998	758	628	1952	1661	796	960	468	754	704	769	714		996	841	1399	639	1208	924	784	1177	406	1239
300	1163	833	1235	1172	1323	1030	956	1162	1256	1323	1482	1417	1026	770	660	2100	1622	921	941	435	739	616	684	796	1481	1215	932	911	629	1949	1691	958	1233	421	783	744	813	849		805	986	1221	701	1123	995	861	1046	617	1193
301	1198	870	1156	1231	1373	972	1027	1365	1135	1404	1476	1178	1163	936	751	1899	1491	960	1214	505	761	706	893	662	1545	1429	927	860	671	2157	1658	839	1221	476	814	721	709	823		965	981	1294	708	1110	863	791	1090	594	1336
[truncated: 202 more columns]

## Sheet: ASK WT,unc18,odr10 to dia
Figures 5S-1I, 5S-1L
ASK::GCaMP5A F(A.U.)
Stimulus:	0
Genotype:	WT
N:	1	2	3	4	5	6	7	8	9	10	11	12	13	14	15	16	17	18	19	20	21	22	23	24	25	26	27	28	29	30	31	32	33	34	35	36	37	38	39	40	41	42	43	44	45	46	47	48	49
Frame (Pulse at 100)
1	3981	3003	2859	2773	2225	3425	4304	4713	2415	2719	2546	4323	3241	3501	2222	1966	2169	2133	1006	3469	2989	3182	3708	2255	1797	3390	2042	2337	3140	2191	2484	2609	3769	2297	2557	3468	2787	2154	2205	3478	4786	5896	2654	2425	3501	3041	6041	3205	1916
2	3842	3119	2932	2574	2318	3489	3996	4790	2170	2691	2529	4343	3445	3868	1998	1977	2104	2178	993	3440	3005	3283	3781	2298	1674	3407	2132	2555	3081	2535	2691	2675	3681	2324	2907	3450	2866	2158	2191	3468	5228	6090	2599	2438	3454	2839	5917	3147	2016
3	3761	3197	3008	2404	2467	4092	4187	4864	2245	2972	2362	4452	3181	3933	2125	1887	1889	2316	1001	3521	2934	3426	3790	2286	1603	3565	2137	2563	3338	2360	2723	2730	3800	2453	2489	3637	2739	2094	2265	4196	4794	5906	2652	2409	3531	2767	6128	3294	1865
4	3881	3226	2927	2577	2341	3497	4144	4780	2218	2704	2479	4609	3267	3532	2029	2136	2203	2107	1000	3395	2713	3307	3711	2277	1762	3265	2207	2522	3508	2179	2764	2738	3790	2303	2695	3396	2799	2283	2000	3375	4978	6248	2574	2603	3433	2871	5956	3935	1820
5	3859	3223	2997	2578	2318	4022	4084	4675	2387	2791	2460	4570	3155	3328	2068	2110	2041	1899	1136	3525	3057	3259	3626	2337	1650	3145	2018	2563	3189	2283	2677	2826	3931	2416	2327	3463	2967	2170	1637	3411	5287	6532	2605	2596	3652	2987	6131	3333	1827
6	4126	3207	3036	2542	2471	3941	4250	4465	2445	2682	2537	4577	3274	3403	2005	2052	2265	2213	1269	3326	2951	3371	3320	2126	1398	3251	2012	2501	3561	2578	2783	2574	3898	2402	2344	3481	2889	2167	2060	3450	5048	6540	2755	2306	3649	2982	5942	2983	1941
7	4395	2930	3015	2304	2197	3654	4079	4586	2628	2949	2646	4470	3095	3975	2184	2071	2050	2241	1045	3453	3109	3031	3451	2216	1566	3394	2160	2656	3316	2254	2808	2750	3632	2459	2683	3719	2782	2234	2245	4073	5034	6515	2866	2611	3579	2913	6077	3583	1828
8	4271	3065	3013	2358	2361	4149	4184	4717	2440	2893	2303	4540	3308	3526	1932	2044	2131	2233	1071	3279	2865	3278	3275	2237	1557	3307	2176	2749	3734	2312	2793	2716	3817	2413	2604	3419	2862	2141	2127	3422	5128	6542	2540	2685	3644	2853	6148	3318	2144
9	4264	3093	3005	2335	2255	3926	4507	4486	2356	2753	2470	4548	3136	4189	2122	2041	2354	2141	1103	3537	3048	3376	3440	2356	1585	3385	2237	2599	3680	2217	2786	2669	3992	2437	2374	3348	2801	2068	2158	3511	5169	6503	2643	2354	3759	2892	6254	3153	1984
10	4123	3111	2899	2521	2122	3757	4437	4564	2416	2818	2389	4437	3186	4126	2179	1934	2097	2119	999	3373	3151	3634	3507	2280	1695	3173	1895	2590	3801	2624	2832	2634	3947	2278	2414	3638	2797	2075	2192	3440	5093	6556	2942	2273	3687	2890	5956	3155	1788
11	4312	3243	2910	2387	2286	3697	4161	4422	2363	2807	2382	4545	3234	3957	1947	2020	2196	2096	1068	3545	3225	3456	3343	2126	1608	3323	2153	2739	3818	2359	2791	2584	3894	2351	2608	3545	2918	2278	2232	3494	5283	6206	2683	2282	3595	2854	5906	3866	1978
12	4562	3290	2972	2496	2336	4048	4227	4626	2498	2665	2386	4546	3135	4018	2107	1929	2179	2164	858	3372	3184	3438	3604	2225	1475	3254	2224	2621	3892	2440	2713	2604	3902	2443	2460	3500	2831	2092	2389	3489	5192	6054	2661	2570	3478	2791	6374	3780	2109
13	4292	3189	3280	2564	2309	3418	4417	4523	2439	2798	2606	4323	3171	4087	1922	1866	2262	2237	1157	3401	3432	3452	3298	2204	1644	3628	2100	2517	3839	2325	2835	2740	4131	2892	2641	3562	2839	2085	2122	4110	5125	6104	2770	2393	3533	2974	6215	4013	1980
14	4205	3129	2895	2206	2439	4048	4418	4606	2287	3084	2703	4456	3160	3924	2065	1870	2218	2327	1056	3267	3184	3251	3266	2295	1484	3630	2118	2544	4009	2391	2560	2679	3904	2564	2406	3699	2814	2225	2208	3731	5353	6012	2909	2616	3379	2876	6080	3652	1897
15	4392	3123	3032	2334	2271	3426	4352	4671	2326	2880	2631	4485	3095	3850	2057	1987	2125	2097	1031	3588	3055	3161	3312	2231	1740	3363	2042	2548	3867	2410	2630	2649	4366	2441	2530	3427	2674	2202	2057	4061	4958	6117	2757	2233	3649	3109	4876	3729	1985
16	4365	3248	3048	2492	2369	4091	4445	4455	2445	2976	2620	4280	3094	3943	2059	2003	2301	2120	1077	3135	3080	3480	3291	2277	1553	3526	2156	2486	3805	2472	2768	2651	4218	2932	2388	3636	2714	2070	2119	3975	5473	5948	2694	2734	3558	2908	6184	3932	2201
17	4286	3489	2999	2438	2310	3568	4518	4705	2273	3063	2363	4310	3273	4009	2010	1810	2102	2148	1096	3173	3127	3596	3446	2152	1555	3547	1994	2541	3998	2472	2685	2636	4091	2363	2349	3546	3080	2285	2194	3681	5030	5953	2713	2326	3397	2768	6288	3234	2040
18	4471	3292	2808	2594	2443	3596	4818	4557	2509	2891	2602	4543	3157	3998	2012	1995	2134	2067	1115	3074	3148	3404	3476	2170	1570	3579	2085	2365	4055	2685	2797	2525	4406	2317	2661	3605	2753	1978	2335	3747	5498	5951	2569	2444	3660	2621	4464	3058	2008
19	4454	3410	2968	2523	2457	3401	4813	4518	2311	2861	2392	4102	3111	4011	1975	2051	2222	2153	1216	3288	3069	3392	3165	2070	1770	3451	1977	2548	4061	2418	2729	2650	4099	2854	2314	3467	2834	2353	2180	3724	5161	6143	2657	2608	3719	2708	6039	3836	2043
20	4096	3271	3148	2697	2360	4036	5140	4353	2465	3014	2564	4245	2863	3816	2005	1739	2103	2238	1234	3266	3239	3493	3292	2206	1551	3454	2020	2462	3912	2555	2801	2715	4208	2259	2598	3587	2869	2277	1729	3953	5238	5894	2745	2609	3600	2778	6132	4035	1943
21	4343	3647	3215	2536	2338	4012	5330	4598	2326	2821	2490	4282	3085	3942	2071	1888	2286	2240	1192	3199	3248	3274	3245	2015	1562	3426	1757	2458	3969	2394	2841	2758	4151	2648	2466	3551	2818	2108	2084	3636	6209	5784	2789	2519	3658	2594	5721	3226	2001
22	4238	3407	3234	2450	2162	3501	5244	4685	2310	2859	2360	4531	3029	3827	2421	2107	2226	2250	1125	3101	3075	3193	3306	2283	1542	3457	2008	2411	4019	2595	3015	2762	4187	2174	2644	3881	3072	2406	2373	3639	5006	6053	2722	3042	3518	2692	6132	4117	2155
23	4109	3508	3267	2334	2424	3565	5210	4399	2261	2891	2398	4167	3073	3886	2086	2116	2161	2162	1125	3193	2963	3489	3072	2136	1520	3411	1963	2584	3724	2228	2839	2653	4249	2410	2512	3566	2918	2053	2408	3720	5240	5828	2727	3125	3864	2384	5795	3788	2102
24	4440	3615	3225	2263	2195	4076	5394	4649	2515	3087	2725	4298	3190	3999	2207	1873	2342	2068	1287	3080	3171	3271	3037	2198	1629	3486	1972	2323	4009	2425	2801	2726	4229	2363	2726	3502	2813	2441	2216	4250	5210	5965	2974	3164	3708	2608	6197	3899	2021
25	4308	3430	3578	2478	2317	3419	5432	4541	2392	2991	2406	4216	3020	3660	2035	1957	2086	2084	1173	3134	3037	3135	3155	1975	1629	3308	1851	2394	3871	2438	2729	2649	4119	2253	2765	3654	2740	2234	2263	3788	5022	6027	2972	3147	3660	2704	5826	3863	2022
26	4314	3443	3141	2506	2257	4144	5312	4722	2434	2918	2494	4256	3009	3823	2058	1860	2211	2028	1189	3047	3178	3489	3078	2161	1640	3513	2193	2691	3903	2513	2782	2633	4348	2599	2686	3628	2812	2249	2241	3736	5003	5859	2748	3162	3571	2645	5747	3054	1994
27	4553	3458	3374	2444	2357	3919	5469	4786	2522	2961	2523	4147	3150	3704	1988	2020	2133	2186	1297	2916	2989	3436	3093	2171	1583	3534	1934	2468	3859	2810	2960	2612	4190	3177	2744	3589	2652	2261	2338	3907	5011	5900	2660	2663	3552	2544	5678	3837	2035
28	4376	3348	3240	2804	2344	3922	5424	4490	2215	2585	2491	4278	2920	3652	2148	1735	2277	2169	1195	2896	3179	3316	3021	1977	1480	3434	1989	2509	3914	2410	2791	2363	4276	2316	2857	3787	2891	2158	2301	3874	5241	5824	2969	2669	3812	2531	5782	3784	2021
29	4229	3545	3138	2363	2279	3597	5556	4738	2319	2919	2362	4409	2870	2977	2143	2019	2264	2213	1249	2972	2934	3739	2925	2116	1786	3429	2020	2576	3967	2450	2858	2653	4142	2401	2797	3845	2762	2320	2300	4248	6067	5633	2688	2950	3430	2467	5682	3806	1997
30	4228	3591	3153	2834	2404	3434	5857	4689	2385	3194	2555	4225	2907	3614	1977	1856	2058	2063	1141	2914	3202	3335	3098	2152	1662	3560	1974	2539	3984	2625	2849	2547	4125	2254	2697	3784	2937	2376	2220	3729	5180	5671	2820	2705	3651	2569	5730	3994	1926
31	4430	3687	3300	2626	2458	3951	5514	4726	2298	3158	2500	4614	2962	3524	2205	2119	2146	2118	1329	2984	3332	3606	2897	2117	1522	3582	1862	2427	3831	2413	2836	2556	4288	2380	2872	3829	2856	2291	2088	3698	5150	5687	2655	2356	3586	2475	5635	3624	2049
32	4245	3468	3130	2525	2367	3872	5547	4743	2409	2761	2604	4454	2852	3586	2133	1941	2231	2061	824	2782	3377	3578	2874	1985	1700	3347	2068	2394	3708	2374	3170	2581	4163	2270	2804	3504	2891	2452	2139	4241	5132	5648	2772	2522	3719	2622	5477	3111	2039
33	4011	3601	3226	2560	2316	3515	5700	4731	2612	2859	2377	4297	2933	3457	2115	1806	2166	2212	1261	2804	3234	3537	3148	2125	1527	3688	2046	2464	3775	2667	3046	2674	4327	2979	2876	3505	2690	2382	2287	4191	4856	5487	2589	2870	3186	2461	5471	3592	1956
34	4154	3629	3165	2698	2410	3439	5822	4997	2424	3131	2567	4176	3034	3486	2039	1943	2280	2202	1198	2853	3221	3449	2604	2264	1538	3148	2198	2557	3724	1687	2912	2501	4296	2666	2786	3666	2741	2222	2273	4183	5190	5631	2507	2931	3294	2573	5524	3804	2090
35	4356	3307	3305	2633	2316	3407	5854	4880	2607	2840	2382	4423	2855	3125	1984	1962	2310	2092	1222	3208	3583	3579	2893	2128	1539	3485	1959	2492	3777	2591	2916	2512	4065	2387	2858	3567	2715	2521	1976	3756	5243	5568	2747	2684	3233	2588	5268	3614	1849
36	4442	3478	3236	2619	2302	3918	5740	4612	2381	2747	2879	4304	2863	3322	2134	1847	2082	2170	1168	2669	3192	3465	2867	2094	1724	3356	1981	2521	3760	2442	2937	2601	4391	2388	2742	3573	2599	2395	2257	3697	4935	5362	2689	2535	3664	2624	5462	3436	2027
37	4220	3371	3117	2839	2172	4062	5751	4785	2375	2677	2277	4339	2949	2933	1966	1929	2265	2173	1360	2741	3286	3595	2807	2051	1690	3319	1994	2442	3623	2822	2572	2540	4188	2262	2816	3757	2692	2311	2369	4049	5222	5655	2967	2872	3327	2436	5449	3596	1865
38	4228	3524	2902	2797	2240	3211	6010	4674	2519	3145	2386	4274	2900	3661	1895	1906	2250	2131	1205	2816	3259	3185	2824	2149	1633	3279	1969	2560	3514	2385	2600	2672	4492	2784	2723	3510	2871	2146	2009	3801	4994	5550	2644	2902	3728	2615	5368	3746	1960
39	4488	3665	3070	2517	2211	3150	5812	4672	2592	3067	2552	4407	2830	3309	1777	1841	2074	2014	934	2640	3099	3373	2977	2011	1563	3518	1968	2620	3385	2421	3031	2510	4397	2817	2688	3513	2518	2382	2178	3678	4661	5666	2632	3028	3581	2674	5556	3839	2003
40	4218	3378	2857	2681	2150	3699	5694	4605	2467	3133	2471	4069	3013	3389	2255	1745	2069	2244	1384	2489	3246	3646	2968	2059	1502	3474	1958	2457	3552	2333	2792	2564	4282	2450	2560	3611	2680	2581	2118	3935	4591	5643	2782	3106	3648	2603	5354	3606	1983
41	4299	3590	3064	2816	2482	3801	5725	4625	2254	2936	2695	4062	2886	3407	1945	2039	2016	2203	1179	2666	3255	3517	2846	2190	1497	3413	1891	2539	3473	2392	3105	2481	4392	2355	2580	3521	2563	2395	2203	3796	4734	5396	2593	2727	3272	2521	5385	3747	2047
42	4395	3574	3000	2738	2225	3396	6003	4810	2456	2753	2353	4106	2987	2920	2004	1906	2089	2160	1250	2572	3309	3454	2799	1994	1496	3473	1867	2544	3718	2501	3042	2403	4534	2548	2823	3655	2668	2442	2038	3853	5814	5618	2625	2791	3270	2579	5470	3588	2056
43	4312	3622	2914	3017	2249	3396	5963	4761	2398	3078	2415	4090	2968	3383	1916	1853	2063	2286	1065	2566	3366	3597	2992	2037	1555	3426	1835	2542	3761	2440	3116	2617	4360	2454	2754	3664	2631	2628	2136	3935	4665	5474	2670	3185	3431	2668	5389	2840	1840
44	4036	3525	3159	2861	2407	3912	6096	4717	2435	3322	2550	4326	2826	3359	2117	1888	1925	2212	1275	2621	3349	3406	2647	1969	1701	3269	2106	2636	3961	2061	3235	2430	4382	2866	2772	3732	2846	2411	2158	3827	4869	5717	2662	2906	3354	2696	5736	3594	2133
45	4399	3294	2872	2480	2387	3787	6023	4893	2339	2972	2573	4203	2835	3292	1975	1720	2050	2094	1311	2554	3259	3521	2927	1978	1645	3115	1804	2542	3618	2384	3183	2410	4421	2509	2723	3697	2724	2363	2200	3809	4906	5324	2760	3112	3840	2702	5501	3513	1820
46	4010	3513	3158	2730	2414	3778	5818	4754	2360	2769	2433	4334	3103	3351	1788	1922	2065	2202	1160	2676	3300	3379	2776	2257	1481	3438	2020	2565	3817	2642	2989	2354	4622	2946	2601	3599	2677	2571	2151	3919	4909	5680	2792	3127	3301	2651	5478	3487	1842
47	4195	3428	2865	2466	2317	3413	6042	4692	2637	2991	2503	4194	2845	3264	2078	1932	1971	2120	1338	2676	3456	3170	2753	2047	1706	3162	1926	2611	3455	2548	3103	2171	4381	2248	2760	3803	2807	2417	1616	3704	4788	5525	2644	2997	3385	2599	5590	3342	2080
48	4208	3398	2929	2631	2050	3251	5864	4779	2324	3058	2545	4003	2841	3275	1865	1601	2193	2165	1296	2474	3419	3792	2930	2063	1544	3129	1877	2562	3645	2385	2952	2335	4229	2451	2505	3720	2748	2703	2037	3947	4833	5303	2839	2994	3457	2709	5569	3688	2019
49	4057	3481	3061	2709	2423	3414	5787	4675	2320	2900	2443	4007	2902	3250	1776	1891	2174	2166	1244	2814	3480	3575	2880	2143	1481	3275	2105	2772	3950	2508	2986	2326	4408	2397	2380	3732	2788	2514	2117	3863	5042	5412	2838	3037	3448	2670	5520	3617	1974
50	4173	3364	2964	2783	2428	3255	5920	4642	2572	2861	2566	3998	2927	3316	1714	1758	2210	2153	1252	2389	3604	3667	2902	2067	1743	3122	1873	2624	3868	2795	3242	2310	4363	2850	2538	3770	2657	2623	2300	3921	5079	5278	2599	2960	3641	2577	5190	3323	2107
51	4118	3461	2848	2691	2289	3929	6098	4692	2393	2776	2402	4138	2884	3316	1819	1711	2005	2165	1272	2746	3353	3852	2819	2162	1510	3334	2052	2463	3888	2547	2877	2326	4229	2762	2652	3937	2853	2327	2273	4374	4927	5449	2877	3052	3262	2672	5782	2825	1997
52	4258	3461	3135	2772	2459	3316	5922	5207	2559	3026	2740	4039	2729	3134	1736	1851	1994	2153	1246	2401	3387	3802	2674	2068	1473	3162	2093	2832	3634	2511	2704	2175	4281	2986	2509	3662	2781	2699	2103	3822	6188	5324	2796	3125	3352	2747	5429	3393	2105
53	4322	3245	2822	2636	2223	3662	5662	4670	2210	3217	2638	4087	2703	3327	1965	1735	2112	2203	1129	2499	3367	3572	2891	2145	1483	3139	1852	2770	3680	2646	2892	2225	4284	2787	2682	3948	2556	2554	2280	3800	6292	5285	2774	2719	3427	2639	5524	3446	1878
54	4191	3482	2958	2722	2180	3740	5756	5109	2510	2804	2476	3967	2982	3217	1702	1796	1990	2014	1198	2674	3729	3827	2822	2186	1534	3134	2082	2657	3795	2686	2913	2461	4425	2521	2848	3913	2729	2526	2324	4483	6563	5390	2608	3007	3433	2626	5541	3585	2111
55	4299	3436	3034	2726	2222	3247	6096	4960	2375	2847	2547	3778	2856	2879	1805	1819	2004	2109	1104	2570	3488	3981	2696	2147	1503	3168	2067	2904	3705	2649	2868	2202	4151	3055	2611	3727	2921	2534	2177	4116	5163	5261	2507	3127	3524	2693	5310	3422	2011
56	4324	3643	3124	2558	2353	3743	5991	4937	2480	3147	2443	3872	3012	3170	1861	1822	1899	2177	1341	2438	3634	3777	2779	2213	1417	3216	1799	3083	3864	2502	2938	2372	4404	2356	2610	3587	3078	2532	2327	4077	5222	5440	2755	3031	3275	2847	5345	3572	1948
57	4304	3303	2888	2815	2352	4006	5827	4795	2361	2913	2576	3957	2978	3095	1864	1940	2123	2076	1213	2409	3872	3659	2895	2198	1526	3213	2048	2724	3651	2318	2974	2201	4399	2462	2762	3647	2878	2541	2136	4158	5074	5200	2664	3088	3229	2806	5316	3341	1991
58	4210	3528	2949	2667	2188	3780	6010	5325	2427	3406	2616	4100	3133	3122	1753	1685	2132	2208	1141	2557	3714	3523	2402	2056	1569	3294	2150	2833	3568	1879	2941	2144	4430	2214	2653	4046	2921	2577	1771	3976	5214	5080	2681	2951	3346	2944	5293	3504	1969
59	4249	3286	2919	2624	2332	3379	5710	4906	2508	2988	2708	3866	2969	3049	1774	1805	2217	2123	1260	2610	3949	3759	2685	2215	1462	3021	2007	2685	3773	2340	2579	2244	4533	2285	2585	3896	2873	2553	2005	4097	6568	5231	2634	3203	3253	2709	5220	3634	2097
60	4040	3493	3033	2571	2050	3203	5797	4954	2616	2934	2442	4059	3266	3096	1568	1846	2128	2051	1410	2564	4049	3804	2635	2145	1636	3127	2078	2741	3617	2508	2776	2233	4487	2172	2448	3648	2791	2714	2375	4122	5224	4994	2643	3054	3230	3032	5390	3852	2098
61	4104	3220	2980	2752	2407	3717	5709	4696	2346	2963	2746	3947	2946	3126	1680	1833	2121	2035	1371	2212	3658	3495	2648	2070	1733	3224	2090	2744	3813	2352	2699	2158	4505	2252	2788	3910	3149	2888	2229	4092	5417	5144	2525	3241	3190	3116	5428	3467	2010
62	4019	3388	2998	2410	2401	3244	6043	4822	2510	2772	2514	3773	3032	3327	1687	1834	2194	2097	1263	2302	3624	3860	2595	2153	1640	3132	2127	2768	3441	2804	2665	2206	4228	3132	2516	3685	2940	2677	2386	4850	5422	4824	2634	3321	3139	2857	5248	3804	1974
63	3934	3525	2974	2623	2271	3817	5649	4862	2388	3113	2469	3992	3021	3204	1686	1883	1911	2110	1392	2503	3791	3548	2872	2046	1624	3398	2009	2710	3574	2437	2683	2138	4621	3019	2521	3943	2951	2480	2349	4039	5476	5016	2645	3395	3230	2945	5165	3678	2112
64	4115	3322	2998	2446	2163	3691	5866	4852	2315	2952	2538	4137	3002	3127	1692	1929	2131	1988	1355	2396	4134	3707	2666	1987	1392	3333	2021	2617	3564	2598	2867	2004	4319	3054	2511	3853	3031	2618	2156	4125	6159	5196	2720	3241	3203	2720	5060	3703	1964
65	4026	3514	2994	2741	2396	3748	6215	4684	2414	2922	2699	3886	2890	3298	1782	1905	2173	2182	1244	2306	3659	3725	2536	2128	1541	3337	2153	2640	3593	2608	2622	2202	4335	2396	2656	3963	2872	2579	2413	4055	5205	5153	2343	3428	3479	2832	5374	3905	2153
66	3891	3514	3197	2608	2182	3649	5868	4454	2396	2739	2595	3875	2781	3147	1766	1904	2119	2036	1275	2281	3901	3748	2474	2034	1546	3637	2021	2741	3645	2666	2614	2263	4548	2754	2579	3817	3193	2768	2187	4353	6337	5056	2315	3145	3295	2842	5322	3888	2174
67	4059	3425	3292	2717	2216	3782	5911	4948	2528	2756	2529	3920	2979	3138	1685	1901	2090	1916	1224	2252	3895	3707	2570	2049	1644	3084	2272	2920	3666	2751	2649	2024	4655	2199	2648	3715	2829	2797	2113	4366	5427	5113	2531	3280	3383	2851	5186	3739	2049
68	3626	3288	3056	2481	2276	3294	5796	4666	2364	3074	2427	3907	2916	3242	1787	1868	2216	2016	1258	2320	4048	3776	2501	1916	1418	3303	2201	3067	3490	2573	2490	2032	4555	2281	2717	3897	3080	3113	2591	4568	5622	4935	2648	3477	3424	3026	5277	3897	2083
69	4028	3353	3183	2710	2349	3350	5862	4419	2404	2781	2700	4013	3248	3160	1765	1874	2217	2029	1265	2393	3998	3752	2540	2167	1607	3335	2167	3106	3686	2586	2598	2019	4464	2375	2767	3786	2975	2771	2146	4697	5491	5280	2349	3172	3498	2766	5274	3842	2034
70	3777	3450	3214	2618	2214	3806	5945	4489	2477	2724	2116	3601	2919	2658	1664	1916	1848	2100	1290	2435	3984	3743	2566	2196	1663	3304	2111	3025	3701	2609	2765	1996	4478	2819	2794	3851	3086	2882	2374	4235	5405	5202	2517	3428	3412	2957	5190	3763	1855
71	4128	3379	2933	2479	2293	3742	5857	4304	2519	2935	2535	3939	2898	3093	1693	1973	2055	2149	1306	2348	4102	3586	2517	2148	1642	3188	2144	3014	3598	2552	2597	2243	4508	2276	2781	3837	3126	2537	2181	4382	6502	4697	2533	2926	3393	2885	5302	3649	1997
72	4037	3434	3027	2358	2112	3397	5833	4406	2401	2649	2709	3916	2966	3216	1632	1870	1979	2121	915	2382	4334	3664	2407	2014	1554	3266	2118	3008	3762	2937	2527	1982	4664	2150	2723	3911	3043	2728	2429	4368	5630	5102	2447	3421	3359	2846	5156	3810	2043
73	4203	3283	2966	2578	2237	3320	5867	4334	2383	2885	2619	3753	2882	3208	1815	1980	2115	2223	1248	2391	3880	3765	2559	2054	1598	3412	2199	3146	3923	2631	2406	2035	4699	2379	2741	3703	2936	2720	2209	4911	5408	4959	2469	3506	3467	2774	5075	3635	2144
74	3998	3252	2987	2765	2321	3831	6053	4306	2476	2678	2651	3347	3197	3236	1590	2046	2137	2011	1224	2309	3795	3531	2499	2279	1439	3217	2103	2961	3651	2908	2653	2138	4563	2216	2761	3783	3077	2849	1712	4660	5600	4879	2357	3172	3360	2791	4827	3717	2144
75	4076	3485	2854	2580	1836	3249	5627	4290	2415	2687	2584	3839	3043	3029	1664	1950	2185	2112	1256	2489	4151	3627	2604	1920	1599	3475	2197	3036	3921	2481	2232	2032	4760	2373	2716	3984	2972	2709	2370	4290	5339	5131	2391	3136	3427	2917	4997	3691	2188
76	4114	3426	2988	2650	2352	3697	5703	4320	2357	2703	2778	3702	2934	3330	1634	1886	2041	2107	1226	2275	3997	3614	2630	1906	1589	3388	2054	2850	3698	2775	2366	2084	4823	2114	2603	3974	2905	3148	2468	5283	6722	5002	2368	3133	3435	3037	4964	3826	2108
77	3971	3310	2927	2560	2303	3207	5824	4459	2258	2736	2636	3708	2940	3134	1872	2011	2263	2076	1253	2221	3905	3744	2624	2067	1574	3505	2064	2832	3680	2575	2543	2015	4861	2797	2843	3858	3241	2736	2405	4575	5449	4941	2337	3288	3509	2833	5124	3646	2227
78	3876	3253	2889	2528	1997	3122	5831	4066	2471	2806	2584	3860	3110	3067	1543	2143	2122	2189	1237	2235	3992	3457	2699	2036	1535	3521	2261	2956	3880	3114	2642	1980	4605	2262	2602	3966	3277	2884	1483	4899	5498	5200	2443	3434	3527	2910	5112	3489	2113
79	4002	3212	2959	2618	2343	3512	5647	4293	2359	2883	2712	4041	2825	3178	1803	1765	1933	2025	1194	2300	4218	3782	2705	2047	1541	3407	1979	2969	3721	2394	2688	2056	4686	2307	2642	3902	2970	2860	2389	4488	5563	4783	2548	3406	3546	3002	5207	3815	2002
80	3981	3218	2851	2662	1547	3742	5590	4115	2331	2758	2646	3990	3103	3338	1682	1846	2089	2144	1247	2171	3962	3711	2590	2019	1553	3409	2035	2827	4123	2647	2687	2052	4828	2489	2786	3881	2886	2841	1513	4954	6780	4963	2552	3259	3577	2929	4296	3830	2098
81	3974	3248	2781	2638	1351	3698	5773	4115	2416	2649	2630	3830	2947	2950	1667	2049	1982	1948	1156	2193	4021	3587	2769	2092	1656	3306	2259	2639	3907	2630	2415	2080	4772	2880	2640	3870	3011	2745	2291	5389	5553	5158	2272	3320	3576	2906	4612	3481	2195
82	3993	3425	2812	2601	2317	3651	5694	4215	2364	2939	2747	3862	2991	3097	1681	1850	1995	1979	1130	2266	4218	3602	2599	1947	1567	3464	2075	3137	3854	2305	2412	2056	4730	2170	2600	3793	3173	2869	2553	5338	5592	4993	2501	3595	3443	3087	4982	3705	2253
83	4091	3210	2865	2822	2274	3494	5592	4144	2389	2830	2384	3804	2958	2597	1854	1898	1857	2086	1348	2352	4054	3684	2774	2038	1593	3426	2180	2753	3835	2809	2368	2152	4742	2240	2630	3814	3175	2755	2294	5226	5579	4715	2378	3416	3447	2706	5043	3718	2278
84	4265	3192	2901	2823	2228	3768	5941	4060	2259	2740	2746	3837	2996	3043	1743	1962	2112	1846	1263	2336	4190	3530	2741	1906	1563	3493	2301	2658	3688	2466	2133	2136	4911	2147	2691	4042	2935	2637	2278	4377	5781	4659	2539	3452	3857	3114	5211	3539	2070
85	4272	3456	3136	2759	2288	3826	6028	4010	2185	2929	2641	3897	3251	3115	1660	2092	2022	2059	1174	2509	3853	3518	2690	1894	1544	3510	2129	2808	3725	2722	2349	2057	4671	2349	2566	3739	3230	3074	2350	4946	6819	4521	2359	3577	4164	3125	4810	3601	2433
86	4199	3318	3048	2886	2179	3687	5791	4067	2003	2985	2528	3696	3114	3046	1731	1784	2101	2034	960	2441	4113	3620	2992	1977	1610	3569	2068	2556	3706	2535	2522	1847	4966	2262	2681	3797	3060	3048	2199	4654	5744	4855	2481	3423	3855	2935	4948	3735	2167
87	4062	3156	2940	2768	2273	3811	5938	4284	2260	2949	2623	3898	3083	3199	1581	1973	2262	2168	1309	2287	4120	3685	2909	1817	1673	3715	2179	2743	3746	2480	2277	2088	4869	2666	2417	4033	3029	2912	2313	4954	5556	4875	2353	3444	4171	2931	4892	3791	1966
88	4144	3321	3011	2684	2099	3422	6264	3943	2235	3157	2575	3835	3063	3122	1702	2082	2126	1993	1293	2272	4261	3651	2848	1925	1589	3786	2238	2994	3666	2908	2454	2159	4925	2194	2553	3821	2846	2895	2345	4538	5571	4618	2381	3773	3957	3096	4746	3710	2221
89	4209	3278	2894	2719	2194	3869	5758	4168	2332	2775	2506	3710	3137	3232	1688	2021	2069	2004	1339	2729	4288	3629	2932	1894	1605	3825	1924	2887	3831	2584	2336	2014	4888	2908	2533	3735	2917	3128	1655	5041	6795	4520	2409	3828	3985	3148	4011	3859	2145
90	4264	3485	2980	2877	1489	3346	5672	4357	2245	3115	2532	3802	2891	3088	1499	2008	2113	2137	1236	2445	4039	3458	2812	1952	1568	3690	2067	2888	3706	2417	2506	2081	4996	2230	2673	3816	3159	2845	2374	4741	6787	4613	2464	3898	3796	2996	4116	3904	2389
91	4122	3218	3109	2687	2180	3206	5576	4223	2449	3040	2505	4185	3121	3042	1803	1817	2210	2063	1177	2355	4116	3370	2793	1997	1673	3754	2184	2859	3333	2116	2255	1996	5138	2507	2554	3855	2880	2726	1691	4433	5621	4767	2351	3918	3953	3021	4960	3935	2081
92	4236	3354	2991	2648	2290	3421	5834	4321	2182	2457	2370	3890	3186	3054	1544	1994	2137	2139	1132	2673	4116	3608	2769	1885	1700	3760	2235	3008	3551	2521	2276	2024	5005	2623	2526	3718	2949	3013	2393	5028	5618	4648	2425	4005	3782	3086	4912	3778	2233
93	4266	3455	3235	2599	2150	3925	5930	4201	2319	2672	2681	4096	3075	3058	1705	1917	2152	1935	1155	2488	4121	3753	3033	1799	1566	3563	2195	2843	3702	2482	2235	2092	5006	2706	2556	3717	3071	2731	2176	4411	6984	4575	2355	3486	3831	3034	4976	3092	2265
94	4063	3602	2928	2701	2320	3552	5953	4185	2453	2690	2425	3869	3034	3106	1579	1824	2226	1978	1243	2644	4396	3665	3214	2017	1456	3715	2226	2995	3608	2742	2379	2150	4922	2667	2664	3626	2898	2732	2377	4412	7314	4656	2328	3824	3862	3164	4123	3724	2107
95	3837	3629	2887	2623	2070	3632	5823	4473	2344	2805	2452	3908	3167	3060	1673	2055	2314	2094	1075	2794	4526	3885	2792	1804	1594	3580	2286	2683	3556	2619	2175	2263	5210	2395	2657	3654	3105	2854	2290	4984	5678	4688	2323	3754	3673	3087	4076	3831	2190
96	4124	3628	3165	2911	2240	3276	5733	4296	2304	2946	2491	4052	3237	3052	1660	1917	2197	2225	1101	2537	4430	3759	3002	2002	1629	3553	2146	2659	3692	2445	2490	2266	4982	2256	2507	3814	3021	2787	1720	4342	7157	4833	2427	4102	3895	3031	4592	3916	2201
97	3919	3407	3057	2782	2135	3838	5905	4315	2299	2860	2562	3786	3087	3039	1701	1887	2147	2262	1349	2553	4525	3756	2882	1815	1653	3669	2165	3327	3382	2340	2409	2274	5217	2623	2678	3717	3039	2859	2394	4311	7147	4707	2258	3924	3781	2954	4010	3922	2094
98	4049	3513	2923	2669	2088	3870	6349	4415	2123	2711	2341	4051	3271	3263	1426	1972	2050	2182	1169	2556	4322	3893	2954	1988	1486	3551	2283	2574	3434	2741	2399	2371	5139	2365	2581	3519	3063	2584	2159	4862	5897	5031	2542	3970	3836	3050	4692	3891	2137
99	4137	3505	2868	2776	2111	3286	6534	4086	2349	2609	2504	3827	3026	3117	1699	1925	2217	2182	1186	2603	4408	3643	3252	1865	1571	3617	2188	2981	3546	2464	2315	2354	4783	2616	2545	3476	2970	2765	2220	4363	5900	4902	2350	4054	3769	3044	3819	3744	2031
100	4133	3474	2912	2700	2344	3199	6152	4316	2202	2512	2451	4116	3352	3285	1776	2034	2250	1965	1282	2638	4562	3819	3162	2073	1483	3356	2124	2623	3532	2485	2162	2261	4621	2261	2625	3451	2855	2668	2385	4334	5812	4503	2587	3876	3516	3033	3929	3787	1982
101	3902	3671	2836	2622	2042	3727	5997	4343	2303	2791	2335	4013	3003	3082	1749	1942	2240	2120	1214	2650	4419	3791	3112	2006	1588	3531	2094	2571	3430	2539	2257	2223	4656	2737	2522	3586	2999	2948	2438	4600	6050	4688	2418	4051	3814	3155	4773	3947	2215
102	4115	3542	3016	2543	2194	3822	6268	4438	2337	2528	2481	3997	3115	3211	1574	1852	2239	2286	1258	2546	4437	3676	3207	1919	1500	3532	2229	2655	3425	2852	2280	2245	4504	2344	2574	3434	3174	2465	2179	4131	5785	4787	2463	4229	3746	3114	3814	3106	2039
103	3977	3575	2859	2850	2203	3853	6492	4204	2224	2737	2639	3870	3087	3085	1655	1941	2187	2184	1150	2857	4632	3949	3237	1926	1606	3566	2087	2476	3530	2432	2363	2447	4360	2694	2362	3516	3048	2667	2262	4307	5816	4523	2548	4094	3935	2929	4535	3843	2110
104	4080	3551	3025	2608	1954	3787	6274	4236	2383	2821	2452	4144	3002	2990	1749	2058	2252	2147	1178	2842	4599	3922	3256	2016	1613	3423	2403	2453	3630	2358	2266	2380	4711	2475	2676	3621	3202	2908	2656	4414	6046	4431	2412	3733	3853	3017	3956	3854	2115
105	4143	3577	3066	2627	2192	3281	6074	4367	2389	2746	2576	4052	3023	3110	1736	1983	2291	1992	1165	2857	4558	3950	3383	1909	1659	3681	1847	3102	3529	2391	2239	2282	4889	2500	2597	3578	3192	2936	2418	5247	5987	4879	2451	4137	3882	3127	4590	4026	2123
106	4293	3936	3292	2552	2278	4054	6337	4435	2426	2761	2600	3932	2810	3228	1680	1698	2195	2046	1322	2678	4398	3745	3466	2087	1417	3600	2105	2588	3509	2408	2248	2185	4493	2563	2511	3549	3142	2593	2528	4198	6056	4691	2452	4310	3991	3001	4496	3157	2179
107	4030	3628	2807	2594	2209	3300	6276	4328	2467	2434	2555	3898	2966	3051	1670	1966	2424	2052	1226	2713	4588	3963	3448	1861	1592	3193	2425	2614	3578	1948	2318	2178	4957	2446	2617	3735	2788	2609	2573	4791	5686	4903	2516	4204	3934	3003	4555	3979	2192
108	4254	3773	3214	2564	2218	3466	6504	4291	2400	2685	2605	4026	3247	3053	1603	1849	2353	2046	1221	2781	4915	4113	3473	1955	1651	3362	2277	2544	3527	2585	2244	2470	5080	2523	2450	3707	3053	2746	2265	4393	5831	4503	2314	4240	3914	3104	4253	3240	2113
109	4112	3793	2782	2733	2174	3809	6463	4291	2395	2766	2853	3847	2874	3082	1806	2001	2260	2022	1132	2821	4974	3708	3407	2006	1583	3241	2193	2599	3744	2275	2294	2340	4835	2383	2451	3558	3268	2929	2273	4817	7260	4510	2471	3409	3847	2637	4520	4023	2145
110	4280	4000	3068	2580	2118	3500	6409	4449	2526	2466	2659	3830	3052	3098	1534	2081	2324	2243	1223	2946	4664	3872	3330	2174	1657	3353	1986	2723	3373	2418	2086	2206	4987	2443	2467	3577	3054	2555	2340	4878	5945	4691	2534	4474	4110	2796	4303	3842	2011
111	4502	3957	3052	2703	1251	3867	6234	4459	2397	2410	2905	3837	2992	3125	1768	2036	2105	2069	1267	3049	4725	4040	3403	2071	1623	3311	2058	2652	3316	2311	2312	2369	4901	2661	2503	3719	3100	1898	2470	4754	5751	4801	2495	3459	4065	2933	3839	4034	2072
112	4054	3745	2915	2712	2168	3365	6193	4241	2373	2646	2733	3734	3153	2866	1639	1962	2266	2078	1222	2985	4660	4010	3426	1969	1667	3307	2229	2421	3443	2212	2437	2228	5115	2257	2488	3641	3134	2630	2585	4086	5873	4578	2260	4277	4011	2826	3620	3853	2028
113	4226	3684	3084	2788	2013	3951	6213	4357	2437	2448	2646	3875	3091	3054	1568	1813	2324	2068	1118	3240	4734	4017	3374	2078	1556	3272	2256	2493	3445	1953	2194	2348	5077	2449	2460	3534	3152	2600	2505	4145	6068	4821	2375	4410	4008	2990	4191	4213	2025
114	4321	3676	2985	2603	2365	3979	6484	4301	2407	2930	2552	3700	2917	3049	1948	1864	2248	2100	1245	3211	4822	4019	3373	2011	1557	3409	2059	2472	3642	1852	2039	2398	5015	2727	2420	3690	3476	2600	2489	4052	6929	5019	2492	3435	4118	3071	3650	4073	1888
115	4287	3988	3188	2581	2318	3869	6366	4152	2404	2551	2464	3847	2966	2941	1699	1962	2355	2080	1334	3262	4680	3978	3478	1929	1564	3445	2218	2569	3438	2487	2223	2325	4822	2502	2543	3683	3419	2639	2309	4956	5514	4335	2350	4019	4115	2817	3650	3152	1854
116	4221	3895	3291	2635	2061	3836	6484	4194	2471	2469	2607	3880	2887	3075	1777	1894	2215	2208	1136	3212	4713	4015	3546	2049	1559	3604	2112	2551	3397	2350	2446	2282	4263	2652	2436	3443	3446	2707	2504	4957	5960	4729	2485	4309	4012	2987	4122	4105	2042
117	4240	3712	3050	2499	2069	4201	6355	4233	2597	2395	2555	3761	2947	2951	1798	2000	2221	2185	1300	3193	4695	3967	3500	1832	1683	3421	2220	2530	3484	2655	2409	2395	5300	2517	2376	3768	3606	2659	2099	4190	5970	4810	2192	4343	4227	3054	4243	3238	1897
118	4144	3892	2937	2688	2010	4739	6123	4034	2535	2511	2633	3786	3096	3003	1711	2135	2269	2064	1287	3299	4565	3860	3524	2121	1662	3321	2044	2662	3600	2342	2275	2298	5220	2084	2637	3549	3575	2689	2389	4159	5688	4511	2189	4218	3861	2935	4185	3948	1885
119	4328	3791	3096	2675	2382	4110	6668	4084	2370	2478	2861	3856	3209	3102	1936	1970	2260	2149	1350	3148	4681	4013	3589	2043	1601	3106	1655	2409	3579	1965	2383	2222	5210	2630	2691	3692	3530	2844	2514	4788	5746	4524	2330	4300	4068	3108	4191	3824	1893
120	4290	4160	2920	2637	2223	3768	6297	4200	2536	2518	2614	3751	3022	3249	1935	1958	2125	2030	1217	3198	4723	3988	3593	1960	1619	3686	2018	2545	3677	2265	2433	2334	5492	2356	2579	3622	3493	2714	2618	4644	5619	4338	2336	4266	4009	3106	3727	4149	1939
121	4274	3740	3113	2510	2252	4349	6309	3953	2341	2653	2598	3827	3090	3048	1690	1999	2191	2083	1185	3222	4752	4079	3485	1909	1674	3426	2070	2390	3916	2606	2302	2297	5503	2555	2638	3566	3847	2687	2281	4151	5434	4558	2276	4228	4047	3061	4067	3433	1909
122	4269	3500	2971	2553	2294	4305	6285	3905	2671	2590	2594	3760	2862	2945	1893	1857	2223	2033	1245	3403	4523	4047	3677	1986	1626	3396	1972	2313	4054	2348	2345	2440	5554	2356	2502	3624	3827	2808	2425	4600	5755	4633	2410	4258	4292	2983	3479	3875	1966
123	4167	3830	3076	2517	2304	4568	6455	3914	2453	2657	2634	3636	3059	2951	1711	1865	2142	2150	1353	3298	4719	4119	3474	1846	1647	3570	1930	2337	3764	2626	2222	2171	5371	2302	2430	3374	3668	2571	2435	4091	5489	4320	2321	4321	3896	2989	4019	3351	2107
124	4247	3706	2980	2704	2168	3603	6489	3947	2442	2634	2281	3751	3038	3056	1664	1844	2174	2253	1191	3144	4748	4175	3679	1723	1591	3229	2041	2301	3856	2359	2462	2386	5354	2407	2497	3634	3554	2689	2485	3998	6701	4409	2292	4361	4241	3321	3995	4099	1917
125	3861	3657	2654	2780	2442	4099	6531	3820	2439	2455	2165	3718	2902	3254	1711	1879	2281	2017	1181	3183	4405	4196	3567	1872	1687	3232	2011	2153	4129	2382	2128	2415	5348	2165	2643	3453	3593	2474	2306	3905	5473	4588	2343	4389	4178	3039	3508	3963	1866
126	4214	3709	2932	2597	2213	4393	6160	3680	2614	2570	2274	3561	3165	2931	1699	1952	2107	2002	1146	3186	4207	4289	3454	1796	1613	3198	2011	2099	3559	2331	2280	2459	5416	2538	2789	3663	3570	2578	2524	4743	5582	4523	2296	4273	4087	3314	3491	3343	1945
127	4058	3754	2998	2386	2514	3737	6215	3674	2613	2825	2529	3894	3265	2971	1758	1855	2220	1938	1094	3250	4461	4219	3668	1861	1584	3512	1967	2131	3799	2335	2279	2430	5467	2649	2631	3615	3540	2794	2646	4575	5504	4519	2443	4380	4116	3248	3386	3749	1875
128	4239	3621	3027	2544	2254	3627	6452	3856	2583	2583	2576	3774	3070	2841	1821	1977	2237	2012	1323	3165	4293	4135	3674	2144	1493	3295	2003	2328	3967	2319	2362	2414	5496	2556	2810	3566	3727	2774	2588	4135	5386	4181	2112	4322	4062	3023	3561	3292	1869
129	4171	3458	3033	2137	2375	4273	5953	3275	2587	2623	2433	3682	3072	3192	1753	1790	2053	2186	1098	3070	4262	4307	3765	2031	1686	3180	1892	2499	3613	2320	2185	2464	5523	2796	2664	3463	3808	2618	2539	4240	5283	4410	2194	3487	4119	3074	3182	4125	1852
130	4243	3673	2925	2368	2282	4064	6190	3425	2526	2321	2738	3749	3197	3054	1697	1879	2138	1960	1171	3124	4172	4189	3839	2071	1599	3490	1928	2075	3630	2237	2490	2340	5501	2560	2740	3601	3735	2453	2634	4586	5135	4096	2368	4146	4053	2979	3158	3331	1739
131	4011	3841	3108	2557	2505	4901	6088	3452	2474	2573	2524	3749	3081	3257	1806	1847	2271	2099	1185	3233	4430	4018	3471	1881	1640	3405	1772	2157	3735	2311	2467	2327	5347	2341	2896	3375	3577	2798	2628	4746	5116	4124	2528	4361	4099	3056	4091	3052	1747
132	3893	3483	2911	2530	2493	4271	6038	3839	2706	2492	2691	3865	3207	2882	1600	1872	2097	2073	1141	3161	4564	4148	3723	1793	1510	3286	1902	2066	3768	2238	2075	2527	5422	2709	2858	3618	3491	2770	2497	3957	5163	4390	2434	3978	3822	3085	3972	3990	1804
133	3968	3527	3226	2579	2454	4184	5919	3283	2344	2404	2489	3667	3383	3013	1813	1980	2055	2140	1191	2944	4444	4253	3805	1991	1571	3045	1917	2226	3745	2719	2367	2684	5212	2595	2831	3563	3704	2731	2472	3987	5279	4049	2361	4016	4000	3023	3915	3985	2000
134	4019	3572	2902	2489	2621	4650	5712	3396	2653	2414	2485	3751	3333	3116	1963	2087	1918	2039	1037	3129	4465	4251	3835	1939	1618	3205	1837	2252	3713	2241	2285	2407	5240	2684	2958	3534	3536	2783	2596	4807	5395	4387	2389	3376	3948	3192	3875	3988	1773
135	3917	3585	3104	2711	2537	4080	5748	3493	2671	2347	2255	3792	3306	3007	1751	1955	2242	1958	1156	2761	4540	4527	3702	2008	1726	3162	1866	2241	3851	2210	2455	2549	5310	2808	2986	3732	3567	2526	2455	4185	5603	4196	2192	4063	3821	3195	3249	3217	1816
136	4057	3503	3091	2716	2495	4246	5853	3526	2894	2642	2330	3915	3032	2981	1672	2049	2062	2208	1137	2952	4542	4392	3794	2118	1556	3419	1758	2086	3831	2366	2332	2425	5477	2648	2826	3396	3343	2778	2694	4482	6192	4228	2411	3931	4021	2977	3514	3417	1902
[truncated: 165 more rows]
[truncated: 215 more columns]

## Sheet: AWC WT,unc18,odr10 to dia
Figures 5S-1J, 5S-1M
AWC::GCaMP5A F(A.U.)
[truncated: 305 more rows]
[truncated: 145 more columns]

## Sheet: ASK,AWC,ASE to AWAChr
Figures 5S-1N, 5S-1O
[truncated: 306 more rows]
[truncated: 64 more columns]

[truncated: 5 more sheets: ASK to IAA, AWC to IAA, AWA to IAA, AIA to IAA WT,odr7,ceh36,double, AIA to OP50]
