# Supplementary material for: Reliability of an interneuron response depends on an integrated sensory state
Source: eLife. 2019 Nov 13;8:e50566. doi: 10.7554/eLife.50566 (PMC6894930; doi:10.7554/eLife.50566)
Supplement: Figure 6—source data 2. [file elife-50566-fig6-data2.xlsx]

## Sheet: AIAGCaMP
Figure 6C
Time (s)	AIA::GCaMP5A F(A.U.),	AIA::GCaMP5A dF/F0 (bleach-corrected)				Time(s)	Current (pA)		Note: GCaMP5A recording is longer than current protocol
0	754.7	0.0273309				0.005	0.005
0.0212119	778.7	0.0600297				0.006	0.006
0.0424237	767	0.0441314				0.007	0.007
0.0636356	777.2	0.0580458				0.008	0.008
0.0848474	774.2	0.0539906				0.009	0.009
0.106059	768.5	0.0462593				0.01	0.01
0.127271	766.8	0.0439735				0.011	0.011
0.148483	769.5	0.0476782				0.012	0.012
0.169695	766.3	0.0433499				0.013	0.013
0.190907	776	0.0565859				0.014	0.014
0.212119	768.2	0.0459942				0.015	0.015
0.23333	768.3	0.046159				0.016	0.016
0.254542	760	0.0348857				0.017	0.017
0.275754	769.5	0.0478504				0.018	0.018
0.296966	763.7	0.0399809				0.019	0.019
0.318178	767.3	0.0449119				0.02	0.02
0.33939	761.7	0.0373142				0.021	0.021
0.360602	777.6	0.0589965				0.022	0.022
0.381813	772.7	0.0523522				0.023	0.023
0.403025	765.9	0.0431197				0.024	0.024
0.424237	765.1	0.0420587				0.025	0.025
0.445449	759.7	0.0347323				0.026	0.026
0.466661	764.6	0.0414348				0.027	0.027
0.487873	757.2	0.0313838				0.028	0.028
0.509085	770.4	0.0493923				0.029	0.029
0.530296	764.2	0.0409756				0.03	0.03
0.551508	751.7	0.0239765				0.031	0.031
0.57272	753.6	0.0265928				0.032	0.032
0.593932	755.2	0.0288006				0.033	0.033
0.615144	768.6	0.047084				0.034	0.034
0.636356	767.7	0.0458866				0.035	0.035
0.657568	748.5	0.0197572				0.036	0.036
0.678779	750	0.0218288				0.037	0.037
0.699991	758.2	0.0330291				0.038	0.038
0.721203	758.8	0.0338749				0.039	0.039
0.742415	756.3	0.0304969				0.04	0.04
0.763627	764.8	0.0421072				0.041	0.041
0.784839	763	0.039683				0.042	0.042
0.80605	774.2	0.0549733				0.043	0.043
0.827262	754.2	0.0277483				0.044	0.044
0.848474	764.5	0.0418127				0.045	0.045
0.869686	765.1	0.0426589				0.046	0.046
0.890898	759.5	0.0350557				0.047	0.047
0.91211	756.7	0.0312682				0.048	0.048
0.933322	769.1	0.0481962				0.049	0.049
0.954533	757.8	0.0328239				0.05	0.05
0.975745	759.1	0.0346241				0.051	0.051
0.996957	759.9	0.0357429				0.052	0.052
1.01817	751.7	0.0245944				0.053	0.053
1.03938	757	0.0318468				0.054	0.054
1.06059	762.1	0.038827				0.055	0.055
1.0818	763	0.0400823				0.056	0.056
1.10302	747.8	0.0193904				0.057	0.057
1.12423	761.7	0.0383672				0.058	0.058
1.14544	747.6	0.0191737				0.059	0.059
1.16665	755.5	0.0299717				0.06	0.06
1.18786	760.6	0.036953				0.061	0.061
1.20908	751.6	0.0247111				0.062	0.062
1.23029	754.8	0.0291021				0.063	0.063
1.2515	766.2	0.0446737				0.064	0.064
1.27271	757.7	0.0331127				0.065	0.065
1.29392	755.8	0.0305504				0.066	0.066
1.31514	761.7	0.0386236				0.067	0.067
1.33635	760.7	0.0372886				0.068	0.068
1.35756	752.8	0.0265443				0.069	0.069
1.37877	762.5	0.0398001				0.07	0.07
1.39998	755.5	0.0302827				0.071	0.071
1.42119	754.3	0.0286744				0.072	0.072
1.44241	752.1	0.0257024				0.073	0.073
1.46362	770.5	0.0508248				0.074	0.074
1.48483	752.8	0.0267134				0.075	0.075
1.50604	759.9	0.0364252				0.076	0.076
1.52725	759.7	0.0361809				0.077	0.077
1.54847	751.3	0.024752				0.078	0.078
1.56968	746	0.0175508				0.079	0.079
1.59089	763.4	0.0413132				0.08	0.08
1.6121	759.4	0.0358854				0.081	0.081
1.63331	770.1	0.05051				0.082	0.082
1.65452	756.9	0.0325319				0.083	0.083
1.67574	758.3	0.0344701				0.084	0.084
1.69695	760.7	0.0377727				0.085	0.085
1.71816	751.5	0.0252499				0.086	0.086
1.73937	763.9	0.0421955				0.087	0.087
1.76058	755	0.0300814				0.088	0.088
1.7818	762.5	0.0403426				0.089	0.089
1.80301	759.8	0.0366872				0.09	0.09
1.82422	751.7	0.0256635				0.091	0.091
1.84543	750.1	0.0235085				0.092	0.092
1.86664	742.9	0.013712				0.093	0.093
1.88786	761	0.0384386				0.094	0.094
1.90907	748.9	0.0219553				0.095	0.095
1.93028	752.5	0.0268961				0.096	0.096
1.95149	752.7	0.0271972				0.097	0.097
1.9727	753.3	0.0280443				0.098	0.098
1.99391	760.7	0.0381717				0.099	0.099
2.01513	760.3	0.0376543				0.1	0.1
2.03634	766.2	0.0457354				0.101	0.101
2.05755	765.3	0.0445357				0.102	0.102
2.07876	753.4	0.028322				0.103	0.103
2.09997	759.2	0.0362669				0.104	0.104
2.12119	747.5	0.0203251				0.105	0.105
2.1424	752.7	0.0274512				0.106	0.106
2.16361	751.2	0.0254318				0.107	0.107
2.18482	760.8	0.0385649				0.108	0.108
2.20603	752.2	0.0268533				0.109	0.109
2.22724	755.9	0.0319327				0.11	0.11
2.24846	750.8	0.0249985				0.111	0.111
2.26967	758.3	0.035266				0.112	0.112
2.29088	753.8	0.0291506				0.113	0.113
2.31209	757.2	0.033821				0.114	0.114
2.3333	738.8	0.00872682				0.115	0.115
2.35452	758.8	0.0360625				0.116	0.116
2.37573	748.1	0.0214808				0.117	0.117
2.39694	755.7	0.0318864				0.118	0.118
2.41815	741.7	0.0127977				0.119	0.119
2.43936	747.4	0.0206091				0.12	0.12
2.46058	764.2	0.043579				0.121	0.121
2.48179	750.5	0.0248986				0.122	0.122
2.503	756.4	0.0329842				0.123	0.123
2.52421	756	0.0324663				0.124	0.124
2.54542	761.5	0.0400062				0.125	0.125
2.56663	753	0.0284258				0.126	0.126
2.58785	752.8	0.0281809				0.127	0.127
2.60906	752.8	0.0282091				0.128	0.128
2.63027	764.8	0.044628				0.129	0.129
2.65148	761.2	0.0397394				0.13	0.13
2.67269	749.1	0.0232399				0.131	0.131
2.69391	751.2	0.0261366				0.132	0.132
2.71512	755.4	0.0319021				0.133	0.133
2.73633	759.8	0.0379412				0.134	0.134
2.75754	740.8	0.0120137				0.135	0.135
2.77875	755.2	0.031714				0.136	0.136
2.79996	750.4	0.0251847				0.137	0.137
2.82118	741	0.0123704				0.138	0.138
2.84239	765.9	0.0464181				0.139	0.139
2.8636	749.3	0.0237663				0.14	0.14
2.88481	767.8	0.0490717				0.141	0.141
2.90602	745.4	0.0184938				0.142	0.142
2.92724	764.3	0.044347				0.143	0.143
2.94845	762.3	0.0416428				0.144	0.144
2.96966	757.8	0.0355222				0.145	0.145
2.99087	749.2	0.0237986				0.146	0.146
3.01208	741.1	0.0127576				0.147	0.147
3.0333	753.1	0.0291847				0.148	0.148
3.05451	754.8	0.0315363				0.149	0.149
3.07572	747.6	0.0217246				0.15	0.15
3.09693	746.5	0.0202493				0.151	0.151
3.11814	751.1	0.0265644				0.152	0.152
3.13935	740.8	0.0125148				0.153	0.153
3.16057	742.4	0.0147295				0.154	0.154
3.18178	747.5	0.0217284				0.155	0.155
3.20299	758.4	0.0366557				0.156	0.156
3.2242	747.9	0.0223314				0.157	0.157
3.24541	736.7	0.00704944				0.158	0.158
3.26663	750.6	0.0260786				0.159	0.159
3.28784	749.3	0.0243297				0.16	0.16
3.30905	753.2	0.0296895				0.161	0.161
3.33026	753.4	0.0299912				0.162	0.162
3.35147	745.3	0.0189456				0.163	0.163
3.37268	753.4	0.0300479				0.164	0.164
3.3939	755.1	0.0324006				0.165	0.165
3.41511	753.1	0.0296944				0.166	0.166
3.43632	777	0.0624015				0.167	0.167
3.45753	741.5	0.0138898				0.168	0.168
3.47874	742	0.0146014				0.169	0.169
3.49996	751.5	0.0276199				0.17	0.17
3.52117	740.5	0.0126061				0.171	0.171
3.54238	747.2	0.0217962				0.172	0.172
3.56359	747.5	0.0222346				0.173	0.173
3.5848	741.7	0.0143308				0.174	0.174
3.60602	743.7	0.0170939				0.175	0.175
3.62723	763.2	0.0437911				0.176	0.176
3.64844	741.4	0.0140042				0.177	0.177
3.66965	737.5	0.008698				0.178	0.178
3.69086	754.6	0.0321145				0.179	0.179
3.71207	749	0.0244833				0.18	0.18
3.73329	741.6	0.0143894				0.181	0.181
3.7545	757	0.0354827				0.182	0.182
3.77571	748.3	0.0236103				0.183	0.183
3.79692	748.3	0.0236385				0.184	0.184
3.81813	746.3	0.0209307				0.185	0.185
3.83935	745.1	0.0193172				0.186	0.186
3.86056	743.6	0.0172931				0.187	0.187
3.88177	746.7	0.0215623				0.188	0.188
3.90298	754.9	0.0328092				0.189	0.189
3.92419	738.4	0.0102627				0.19	0.19
3.94541	748.1	0.0235622				0.191	0.191
3.96662	748.6	0.0242745				0.192	0.192
3.98783	755.4	0.0336071				0.193	0.193
4.00904	746.4	0.0213206				0.194	0.194
4.03025	753.4	0.0309273				0.195	0.195
4.05146	745.7	0.0204189				0.196	0.196
4.07268	741.8	0.0151101				0.197	0.197
4.09389	751.4	0.0282755				0.198	0.198
4.1151	754.7	0.0328199				0.199	0.199
4.13631	747.7	0.0232685				0.2	0.2
4.15752	742.4	0.0160431				0.201	0.201
4.17874	756.8	0.0357794				0.202	0.202
4.19995	739	0.0114456				0.203	0.203
4.22116	755	0.0333728				0.204	0.204
4.24237	733.7	0.00424699				0.205	0.205
4.26358	746.4	0.0216582				0.206	0.206
4.28479	749.8	0.0263403				0.207	0.207
4.30601	752.3	0.0297907				0.208	0.208
4.32722	736.5	0.00819055				0.209	0.209
4.34843	736.8	0.00862901				0.21	0.21
4.36964	746.8	0.0223465				0.211	0.211
4.39085	742.7	0.0167617				0.212	0.212
4.41207	740.3	0.013504				0.213	0.213
4.43328	742.2	0.0161332				0.214	0.214
4.45449	741.5	0.0152028				0.215	0.215
4.4757	757.7	0.0374112				0.216	0.216
4.49691	739	0.0118358				0.217	0.217
4.51813	738.9	0.0117267				0.218	0.218
4.53934	749.5	0.0262689				0.219	0.219
4.56055	740	0.0132887				0.22	0.22
4.58176	751.9	0.0296119				0.221	0.221
4.60297	742.4	0.0166311				0.222	0.222
4.62418	751.7	0.0293948				0.223	0.223
4.6454	754.9	0.0338054				0.224	0.224
4.66661	746.7	0.022604				0.225	0.225
4.68782	744.3	0.0193453				0.226	0.226
4.70903	753.8	0.0323844				0.227	0.227
4.73024	761.7	0.0432327				0.228	0.228
4.75146	741.7	0.0158685				0.229	0.229
4.77267	749.2	0.0261692				0.23	0.23
4.79388	744.5	0.0197598				0.231	0.231
4.81509	739.9	0.013487				0.232	0.232
4.8363	756.6	0.0363906				0.233	0.233
4.85751	753.7	0.0324466				0.234	0.234
4.87873	755.9	0.0354888				0.235	0.235
4.89994	736.1	0.00839306				0.236	0.236
4.92115	752.5	0.0308881				0.237	0.237
4.94236	748.4	0.0252995				0.238	0.238
4.96357	755.5	0.035055				0.239	0.239
4.98479	742.3	0.0169987				0.24	0.24
5.006	751.7	0.0299057				0.241	0.241
5.02721	745.7	0.0217132				0.242	0.242
5.04842	750.1	0.0277702				0.243	0.243
5.06963	737.1	0.00998573				0.244	0.244
5.09085	748.1	0.0250864				0.245	0.245
5.11206	739.2	0.012919				0.246	0.246
5.13327	741.6	0.0162358				0.247	0.247
5.15448	760.5	0.0421637				0.248	0.248
5.17569	740.6	0.0149214				0.249	0.249
5.1969	735	0.00727494				0.25	0.25
5.21812	748.6	0.0259412				0.251	0.251
5.23933	741.5	0.0162389				0.252	0.252
5.26054	752.7	0.0316171				0.253	0.253
5.28175	743.2	0.0186249				0.254	0.254
5.30296	741	0.0156376				0.255	0.255
5.32418	750.8	0.0290982				0.256	0.256
5.34539	746.7	0.0235067				0.257	0.257
5.3666	735.1	0.00763431				0.258	0.258
5.38781	730.8	0.00176774				0.259	0.259
5.40902	739.3	0.0134473				0.26	0.26
5.43023	740.9	0.0156687				0.261	0.261
5.45145	732.6	0.00431826				0.262	0.262
5.47266	737.3	0.0107894				0.263	0.263
5.49387	739.3	0.0135592				0.264	0.264
5.51508	746.1	0.02291				0.265	0.265
5.53629	732.5	0.00429201				0.266	0.266
5.55751	741.4	0.0165224				0.267	0.267
5.57872	741.7	0.0169618				0.268	0.268
5.59993	750.8	0.0294674				0.269	0.269
5.62114	744	0.0201716				0.27	0.27
5.64235	738.3	0.0123837				0.271	0.271
5.66357	743.1	0.0189938				0.272	0.272
5.68478	742.8	0.0186105				0.273	0.273
5.70599	744.3	0.0206957				0.274	0.274
5.7272	748.8	0.0268951				0.275	0.275
5.74841	740.5	0.0155406				0.276	0.276
5.76962	741.5	0.0169401				0.277	0.277
5.79084	734.3	0.00709335				0.278	0.278
5.81205	743	0.0190535				0.279	0.279
5.83326	743	0.0190817				0.28	0.28
5.85447	751.2	0.030357				0.281	0.281
5.87568	741.2	0.016669				0.282	0.282
5.8969	745.7	0.0228696				0.283	0.283
5.91811	749.8	0.0285219				0.284	0.284
5.93932	739.8	0.0148327				0.285	0.285
5.96053	738.9	0.0136261				0.286	0.286
5.98174	742.3	0.0183183				0.287	0.287
6.00295	741.7	0.0175233				0.288	0.288
6.02417	738.1	0.0126125				0.289	0.289
6.04538	732.9	0.00550628				0.29	0.29
6.06659	740.2	0.0155496				0.291	0.291
6.0878	741.7	0.0176357				0.292	0.292
6.10901	746.4	0.0241125				0.293	0.293
6.13023	752.8	0.0329223				0.294	0.294
6.15144	731.2	0.00331247				0.295	0.295
6.17265	725	-0.00516736				0.296	0.296
6.19386	755.5	0.0367129				0.297	0.297
6.21507	725.2	-0.00483796				0.298	0.298
6.23629	738	0.0127549				0.299	0.299
6.2575	745.5	0.0230754				0.3	0.3
6.27871	746.4	0.0243388				0.301	0.301
6.29992	739.4	0.0147602				0.302	0.302
6.32113	748.2	0.0268658				0.303	0.303
6.34234	734.6	0.00822834				0.304	0.304
6.36356	736.3	0.0105895				0.305	0.305
6.38477	733.3	0.00649971				0.306	0.306
6.40598	741.1	0.0172338				0.307	0.307
6.42719	738.2	0.0132812				0.308	0.308
6.4484	756.5	0.0384292				0.309	0.309
6.46962	741.6	0.0180045				0.31	0.31
6.49083	731.1	0.00361868				0.311	0.311
6.51204	740.2	0.0161388				0.312	0.312
6.53325	734	0.00765534				0.313	0.313
6.55446	738.3	0.0135865				0.314	0.314
6.57568	741.3	0.0177332				0.315	0.315
6.59689	755.3	0.0369825				0.316	0.316
6.6181	746.7	0.0252035				0.317	0.317
6.63931	742.7	0.0197398				0.318	0.318
6.66052	745.8	0.0240245				0.319	0.319
6.68173	740	0.0160888				0.32	0.32
6.70295	728.6	0.000463198				0.321	0.321
6.72416	739	0.0147718				0.322	0.322
6.74537	738	0.0134266				0.323	0.323
6.76658	740.4	0.0167504				0.324	0.324
6.78779	730	0.00249639				0.325	0.325
6.80901	752.5	0.0334238				0.326	0.326
6.83022	734.6	0.00886926				0.327	0.327
6.85143	752	0.0327942				0.328	0.328
6.87264	749.2	0.0289772				0.329	0.329
6.89385	744.7	0.022825				0.33	0.33
6.91506	736.3	0.0113158				0.331	0.331
6.93628	741	0.0177994				0.332	0.332
6.95749	735.1	0.00972338				0.333	0.333
6.9787	725.6	-0.00329814				0.334	0.334
6.99991	742.1	0.0193948				0.335	0.335
7.02112	724.7	-0.00447936				0.336	0.336
7.04234	736.1	0.0112088				0.337	0.337
7.06355	734.6	0.00917608				0.338	0.338
7.08476	738.5	0.0145619				0.339	0.339
7.10597	737.4	0.0130787				0.34	0.34
7.12718	744.2	0.0224491				0.341	0.341
7.1484	747	0.0263244				0.342	0.342
7.16961	733.3	0.00752944				0.343	0.343
7.19082	734.6	0.00934351				0.344	0.344
7.21203	742.6	0.0203638				0.345	0.345
7.23324	727.4	-0.000494046				0.346	0.346
7.25445	730.2	0.00338113				0.347	0.347
7.27567	742.4	0.0201736				0.348	0.348
7.29688	730.2	0.00343662				0.349	0.349
7.31809	724.6	-0.00423133				0.35	0.35
7.3393	743	0.0210828				0.351	0.351
7.36051	737.6	0.0136898				0.352	0.352
7.38173	738.5	0.0149547				0.353	0.353
7.40294	731.7	0.00563697				0.354	0.354
7.42415	735.4	0.0107502				0.355	0.355
7.44536	743.3	0.0216363				0.356	0.356
7.46657	739.2	0.0160292				0.357	0.357
7.48778	744	0.022655				0.358	0.358
7.509	743.9	0.0225459				0.359	0.359
7.53021	738.6	0.0152887				0.36	0.36
7.55142	746.4	0.0260391				0.361	0.361
7.57263	734	0.00902133				0.362	0.362
7.59384	721.8	-0.00772242				0.363	0.363
7.61506	739.6	0.0167758				0.364	0.364
7.63627	735	0.0104799				0.365	0.365
7.65748	745.1	0.0243937				0.366	0.366
7.67869	748.4	0.0289592				0.367	0.367
7.6999	749.9	0.03105				0.368	0.368
7.72112	736.8	0.0130666				0.369	0.369
7.74233	743.7	0.0225821				0.37	0.37
7.76354	741.5	0.0195854				0.371	0.371
7.78475	730.3	0.0042128				0.372	0.372
7.80596	737.2	0.0137288				0.373	0.373
7.82717	732.9	0.00784376				0.374	0.374
7.84839	741.1	0.0191482				0.375	0.375
7.8696	750	0.0314158				0.376	0.376
7.89081	732.9	0.00792744				0.377	0.377
7.91202	746	0.0259717				0.378	0.378
7.93323	730.2	0.00426983				0.379	0.379
7.95445	741.8	0.020252				0.38	0.38
7.97566	733.3	0.0085892				0.381	0.381
7.99687	730.7	0.00504095				0.382	0.382
8.01808	744.2	0.0236379				0.383	0.383
8.03929	733.8	0.00936073				0.384	0.384
8.0605	731.4	0.00608732				0.385	0.385
8.08172	740.4	0.0184956				0.386	0.386
8.10293	729	0.00284149				0.387	0.387
8.12414	726.7	-0.000294807				0.388	0.388
8.14535	736.5	0.0132149				0.389	0.389
8.16656	735.5	0.0118672				0.39	0.39
8.18778	729.8	0.00405319				0.391	0.391
8.20899	740.2	0.0183896				0.392	0.392
8.2302	735.7	0.0122264				0.393	0.393
8.25141	734.3	0.0103282				0.394	0.394
8.27262	730.5	0.00512756				0.395	0.395
8.29384	732.9	0.00845775				0.396	0.396
8.31505	742.7	0.0219707				0.397	0.397
8.33626	752.5	0.0354844				0.398	0.398
8.35747	743.7	0.0234034				0.399	0.399
8.37868	734.8	0.0111841				0.4	0.4
8.39989	718.2	-0.0116323				0.401	0.401
8.42111	747	0.0280299				0.402	0.402
8.44232	752.9	0.0361783				0.403	0.403
8.46353	737	0.014324				0.404	0.404
8.48474	743.6	0.0234358				0.405	0.405
8.50595	735.5	0.0123156				0.406	0.406
8.52717	739.8	0.0182622				0.407	0.407
8.54838	748.3	0.0299902				0.408	0.408
8.56959	732.3	0.00799503				0.409	0.409
8.5908	746.6	0.0277071				0.41	0.41
8.61201	747	0.0282862				0.411	0.411
8.63322	737.9	0.0157877				0.412	0.412
8.65444	734.2	0.0107223				0.413	0.413
8.67565	728.7	0.00317866				0.414	0.414
8.69686	735.7	0.0128434				0.415	0.415
8.71807	742.8	0.0226464				0.416	0.416
8.73928	742.3	0.0219863				0.417	0.417
8.7605	741.5	0.0209132				0.418	0.418
8.78171	733.7	0.0102019				0.419	0.419
8.80292	728	0.00238162				0.42	0.42
8.82413	747	0.0285712				0.421	0.421
8.84534	746.4	0.0277735				0.422	0.422
8.86656	734	0.010727				0.423	0.423
8.88777	735.5	0.0128206				0.424	0.424
8.90898	738.2	0.0165668				0.425	0.425
8.93019	735.8	0.0132899				0.426	0.426
8.9514	738	0.0163477				0.427	0.427
8.97261	723.8	-0.00318038				0.428	0.428
8.99383	740.1	0.0192963				0.429	0.429
9.01504	733.8	0.0106477				0.43	0.43
9.03625	737.4	0.015634				0.431	0.431
9.05746	728.3	0.00312825				0.432	0.432
9.07867	745.6	0.026985				0.433	0.433
9.09989	727.8	0.00249515				0.434	0.434
9.1211	735.6	0.0132672				0.435	0.435
9.14231	735.9	0.0137085				0.436	0.436
9.16352	744.8	0.0259968				0.437	0.437
9.18473	752.7	0.0369082				0.438	0.438
9.20595	740.5	0.0201299				0.439	0.439
9.22716	738.8	0.0178162				0.44	0.44
9.24837	733	0.00985375				0.441	0.441
9.26958	736.1	0.0141527				0.442	0.442
9.29079	746.9	0.0290608				0.443	0.443
9.312	741.1	0.021098				0.444	0.444
9.33322	739.4	0.018784				0.445	0.445
9.35443	735.4	0.0133007				0.446	0.446
9.37564	725.4	-0.000450484				0.447	0.447
9.39685	731.2	0.00756944				0.448	0.448
9.41806	739.8	0.0194482				0.449	0.449
9.43928	733.4	0.010657				0.45	0.45
9.46049	735.4	0.0134412				0.451	0.451
9.4817	731.5	0.00809466				0.452	0.452
9.50291	743	0.0239714				0.453	0.453
9.52412	735.6	0.0138012				0.454	0.454
9.54533	727.5	0.0026656				0.455	0.455
9.56655	743.2	0.0243323				0.456	0.456
9.58776	735.6	0.0138855				0.457	0.457
9.60897	728.7	0.00440306				0.458	0.458
9.63018	730.3	0.00663634				0.459	0.459
9.65139	736.1	0.0146591				0.46	0.46
9.67261	729	0.00490019				0.461	0.461
9.69382	737.5	0.0166453				0.462	0.462
9.71503	730.8	0.00743732				0.463	0.463
9.73624	733.7	0.0114632				0.464	0.464
9.75745	720.9	-0.00615508				0.465	0.465
9.77867	727.5	0.00297162				0.466	0.466
9.79988	736.9	0.0159592				0.467	0.467
9.82109	741.2	0.0219159				0.468	0.468
9.8423	739.1	0.0190488				0.469	0.469
9.86351	734.3	0.0124588				0.47	0.47
9.88472	731.1	0.00807462				0.471	0.471
9.90594	726	0.00107028				0.472	0.472
9.92715	743.1	0.0246776				0.473	0.473
9.94836	728.7	0.00484904				0.474	0.474
9.96957	722.2	-0.00408657				0.475	0.475
9.99078	735.5	0.0142823				0.476	0.476
10.012	741.2	0.0221712				0.477	0.477
10.0332	739.1	0.0193034				0.478	0.478
10.0544	731	0.00816054				0.479	0.479
10.0756	728.7	0.00501639				0.48	0.48
10.0968	737.3	0.0169057				0.481	0.481
10.1181	736.6	0.0159684				0.482	0.482
10.1393	718.5	-0.00896884				0.483	0.483
10.1605	744.3	0.0266457				0.484	0.484
10.1817	738	0.0179841				0.485	0.485
10.2029	736.8	0.0163571				0.486	0.486
10.2241	740.6	0.0216273				0.487	0.487
10.2453	733.3	0.0115853				0.488	0.488
10.2665	730.7	0.00802658				0.489	0.489
10.2877	745.3	0.0281963				0.49	0.49
10.309	742.3	0.0240861				0.491	0.491
10.3302	728.6	0.00521328				0.492	0.492
10.3514	740.8	0.0220734				0.493	0.493
10.3726	738.7	0.0192043				0.494	0.494
10.3938	733.8	0.0124718				0.495	0.495
10.415	742.1	0.0239523				0.496	0.496
10.4362	746.2	0.0296381				0.497	0.497
10.4574	733.8	0.0125561				0.498	0.498
10.4787	729.7	0.0069266				0.499	0.499
10.4999	739.4	0.0203401				0.5	0.5
10.5211	744.9	0.0279585				0.501	0.501
10.5423	741.7	0.0235709				0.502	0.502
10.5635	736	0.0157329				0.503	0.503
10.5847	737.7	0.0181073				0.504	0.504
10.6059	741.3	0.0231041				0.505	0.505
10.6271	728.5	0.00546615				0.506	0.506
10.6484	741.7	0.0237131				0.507	0.507
10.6696	742.9	0.0253978				0.508	0.508
10.6908	740.7	0.0223896				0.509	0.509
10.712	740.8	0.0225561				0.51	0.51
10.7332	743.5	0.0263115				0.511	0.511
10.7544	734.5	0.0139162				0.512	0.512
10.7756	728.9	0.00621387				0.513	0.513
10.7968	724.4	2.9601e-05				0.514	0.514
10.818	738.5	0.0195229				0.515	0.515
10.8393	736.2	0.0163759				0.516	0.516
10.8605	749.5	0.0347662				0.517	0.517
10.8817	737.8	0.0186414				0.518	0.518
10.9029	740.5	0.0223976				0.519	0.519
10.9241	734.8	0.0145559				0.52	0.52
10.9453	740.4	0.0223163				0.521	0.521
10.9665	733.3	0.012541				0.522	0.522
10.9877	744	0.0273442				0.523	0.523
11.009	736.7	0.0172923				0.524	0.524
11.0302	729.6	0.00751607				0.525	0.525
11.0514	729.2	0.00699169				0.526	0.526
11.0726	735.2	0.0153056				0.527	0.527
11.0938	734.2	0.0139528				0.528	0.528
11.115	738.1	0.0193672				0.529	0.529
11.1362	725.9	0.00254599				0.53	0.53
11.1574	739.5	0.0213574				0.531	0.531
11.1786	727	0.00412103				0.532	0.532
11.1999	737.6	0.0187899				0.533	0.533
11.2211	737.1	0.0181276				0.534	0.534
11.2423	735.9	0.0164983				0.535	0.535
11.2635	733.1	0.0126588				0.536	0.536
11.2847	724.6	0.000945298				0.537	0.537
11.3059	733.7	0.013544				0.538	0.538
11.3271	745.8	0.0302878				0.539	0.539
11.3483	735.9	0.0166396				0.54	0.54
11.3696	729.8	0.00824057				0.541	0.541
11.3908	724.8	0.00136076				0.542	0.542
11.412	733.2	0.0129941				0.543	0.543
11.4332	734.5	0.0148184				0.544	0.544
11.4544	725	0.00172063				0.545	0.545
11.4756	731.2	0.0103152				0.546	0.546
11.4968	730.3	0.00909967				0.547	0.547
11.518	742.3	0.0257093				0.548	0.548
11.5392	735.5	0.0163414				0.549	0.549
11.5605	732.9	0.0127767				0.55	0.55
11.5817	726.6	0.00409885				0.551	0.551
11.6029	739.3	0.0216776				0.552	0.552
11.6241	731.4	0.0107883				0.553	0.553
11.6453	734.9	0.0156535				0.554	0.554
11.6665	732.2	0.0119501				0.555	0.555
11.6877	728.3	0.00658807				0.556	0.556
11.7089	730.7	0.00993322				0.557	0.557
11.7302	733.8	0.0142461				0.558	0.558
11.7514	743.9	0.0282347				0.559	0.559
11.7726	733.3	0.0136114				0.56	0.56
11.7938	725.7	0.00313411				0.561	0.561
11.815	731.9	0.0117325				0.562	0.562
11.8362	724.9	0.00208402				0.563	0.563
11.8574	726	0.00363255				0.564	0.564
11.8786	718.1	-0.0072609				0.565	0.565
11.8999	732.8	0.0130893				0.566	0.566
11.9211	731.2	0.0109055				0.567	0.567
11.9423	741	0.0244828				0.568	0.568
11.9635	732.1	0.0122061				0.569	0.569
11.9847	739.1	0.0219128				0.57	0.57
12.0059	727.3	0.00562553				0.571	0.571
12.0271	733.7	0.0145029				0.572	0.572
12.0483	726.1	0.00402219				0.573	0.573
12.0695	723.1	-9.82638e-05				0.574	0.574
12.0908	725.5	0.00324837				0.575	0.575
12.112	727.5	0.00604204				0.576	0.576
12.1332	736	0.0178248				0.577	0.577
12.1544	710.6	-0.0172739				0.578	0.578
12.1756	732.3	0.0127644				0.579	0.579
12.1968	733.5	0.0144522				0.58	0.58
12.218	742.5	0.0269281				0.581	0.581
12.2392	735.6	0.0174132				0.582	0.582
12.2605	724.5	0.00208864				0.583	0.583
12.2817	730.6	0.010554				0.584	0.584
12.3029	728.3	0.00740067				0.585	0.585
12.3241	731.8	0.0122701				0.586	0.586
12.3453	728.1	0.0071801				0.587	0.587
12.3665	728.4	0.00762314				0.588	0.588
12.3877	732.3	0.0130464				0.589	0.589
12.4089	736.5	0.0188849				0.59	0.59
12.4301	739.8	0.0234787				0.591	0.591
12.4514	736.8	0.0193567				0.592	0.592
12.4726	725.9	0.00430459				0.593	0.593
12.4938	744.6	0.0302053				0.594	0.594
12.515	728.5	0.0079579				0.595	0.595
12.5362	733.7	0.0151809				0.596	0.596
12.5574	735.7	0.0179766				0.597	0.597
12.5786	731.1	0.0116398				0.598	0.598
12.5998	738.1	0.0213543				0.599	0.599
12.6211	737.7	0.0208292				0.6	0.6
12.6423	739	0.0226566				0.601	0.601
12.6635	750.5	0.0385997				0.602	0.602
12.6847	723.5	0.00126291				0.603	0.603
12.7059	733.6	0.0152687				0.604	0.604
12.7271	730.9	0.0115602				0.605	0.605
12.7483	737.5	0.020723				0.606	0.606
12.7695	732.2	0.0134159				0.607	0.607
12.7907	720.8	-0.00233473				0.608	0.608
12.812	737.1	0.0202547				0.609	0.609
12.8332	734.3	0.0164074				0.61	0.61
12.8544	738	0.0215573				0.611	0.611
12.8756	717.7	-0.00651477				0.612	0.612
12.8968	736.9	0.0200915				0.613	0.613
12.918	727.5	0.00710711				0.614	0.614
12.9392	726.5	0.00575079				0.615	0.615
12.9604	726	0.0050866				0.616	0.616
12.9817	737.1	0.0204821				0.617	0.617
13.0029	729.8	0.0104037				0.618	0.618
13.0241	747	0.0342458				0.619	0.619
13.0453	741.9	0.0272133				0.62	0.62
13.0665	727.7	0.00758048				0.621	0.621
13.0877	726.3	0.00567005				0.622	0.622
13.1089	733.4	0.0155293				0.623	0.623
13.1301	728.8	0.00918791				0.624	0.624
13.1514	729	0.00949299				0.625	0.625
13.1726	731.3	0.0127062				0.626	0.626
13.1938	724	0.00262505				0.627	0.627
13.215	733.2	0.0153939				0.628	0.628
13.2362	739.6	0.0242857				0.629	0.629
13.2574	735.3	0.0183589				0.63	0.63
13.2786	727.4	0.00744582				0.631	0.631
13.2998	736	0.0193852				0.632	0.632
13.321	736.6	0.0202447				0.633	0.633
13.3423	734.3	0.0170873				0.634	0.634
13.3635	738.9	0.0234874				0.635	0.635
13.3847	724.5	0.00356919				0.636	0.636
13.4059	730.7	0.0121856				0.637	0.637
13.4271	742.2	0.0281444				0.638	0.638
13.4483	726.7	0.0067008				0.639	0.639
13.4695	728.2	0.00880688				0.64	0.64
13.4907	726.7	0.00675694				0.641	0.641
13.512	729.8	0.0110798				0.642	0.642
13.5332	729.2	0.0102767				0.643	0.643
13.5544	729.5	0.0107205				0.644	0.644
13.5756	731	0.012827				0.645	0.645
13.5968	739.5	0.0246327				0.646	0.646
13.618	726.2	0.00623257				0.647	0.647
13.6392	732.5	0.0149902				0.648	0.648
13.6604	720.5	-0.00160975				0.649	0.649
13.6816	729.2	0.0104739				0.65	0.65
13.7029	732.9	0.0156295				0.651	0.651
13.7241	722.5	0.0012454				0.652	0.652
13.7453	734.4	0.0177649				0.653	0.653
13.7665	735.7	0.0195949				0.654	0.654
13.7877	755	0.0463717				0.655	0.655
13.8089	740.5	0.0263044				0.656	0.656
13.8301	729.7	0.0113642				0.657	0.657
13.8513	720.3	-0.00163631				0.658	0.658
13.8726	736	0.020153				0.659	0.659
13.8938	721.9	0.000637174				0.66	0.66
13.915	731.7	0.0142494				0.661	0.661
13.9362	727.4	0.00831707				0.662	0.662
13.9574	731.6	0.0141674				0.663	0.663
13.9786	735.7	0.0198794				0.664	0.664
13.9998	723.6	0.00313349				0.665	0.665
14.021	731.9	0.0146682				0.666	0.666
14.0422	730.1	0.012201				0.667	0.667
14.0635	727.2	0.00820858				0.668	0.668
14.0847	723.7	0.00338409				0.669	0.669
14.1059	738.4	0.0237937				0.67	0.67
14.1271	730.2	0.0124526				0.671	0.671
14.1483	719.4	-0.00249421				0.672	0.672
14.1695	733	0.0163916				0.673	0.673
14.1907	720.5	-0.000913208				0.674	0.674
14.2119	729.9	0.0121496				0.675	0.675
14.2332	719.9	-0.00168948				0.676	0.676
14.2544	729.4	0.0115127				0.677	0.677
14.2756	735	0.0193071				0.678	0.678
14.2968	724.2	0.00435756				0.679	0.679
14.318	732.5	0.0158968				0.68	0.68
14.3392	724.6	0.0049684				0.681	0.681
14.3604	721.4	0.000558159				0.682	0.682
14.3816	725.3	0.00599541				0.683	0.683
14.4028	733.1	0.0168424				0.684	0.684
14.4241	731.5	0.0146515				0.685	0.685
14.4453	734.1	0.0182863				0.686	0.686
14.4665	726.9	0.0083272				0.687	0.687
14.4877	733	0.0168173				0.688	0.688
14.5089	725.1	0.00588648				0.689	0.689
14.5301	736.8	0.0221457				0.69	0.69
14.5513	727.6	0.00941093				0.691	0.691
14.5725	724.1	0.00458338				0.692	0.692
14.5938	721.9	0.00155916				0.693	0.693
14.615	726.7	0.0082468				0.694	0.694
14.6362	723.3	0.00355755				0.695	0.695
14.6574	717.7	-0.00418448				0.696	0.696
14.6786	736.2	0.021513				0.697	0.697
14.6998	722.6	0.00267031				0.698	0.698
14.721	728.1	0.0103303				0.699	0.699
14.7422	727.4	0.00938711				0.7	0.7
14.7635	728.2	0.0105255				0.701	0.701
14.7847	721.4	0.00111704				0.702	0.702
14.8059	720.2	-0.000520341				0.703	0.703
14.8271	720.6	6.27019e-05				0.704	0.704
14.8483	718.8	-0.00240751				0.705	0.705
14.8695	723.3	0.00386589				0.706	0.706
14.8907	721.5	0.00139565				0.707	0.707
14.9119	729.3	0.0122498				0.708	0.708
14.9331	719	-0.00201844				0.709	0.709
14.9544	738.6	0.0252153				0.71	0.71
14.9756	722.7	0.00317325				0.711	0.711
14.9968	732.3	0.0165273				0.712	0.712
15.018	733.9	0.0187768				0.713	0.713
15.0392	716.6	-0.00521073				0.714	0.714
15.0604	720.9	0.000786517				0.715	0.715
15.0816	730.2	0.0137255				0.716	0.716
15.1028	712.5	-0.0108195				0.717	0.717
15.1241	733.3	0.0180861				0.718	0.718
15.1453	731.3	0.0153377				0.719	0.719
15.1665	723.4	0.00439744				0.72	0.72
15.1877	731	0.0149779				0.721	0.721
15.2089	730.1	0.0137566				0.722	0.722
15.2301	732.1	0.0165621				0.723	0.723
15.2513	722.6	0.00339883				0.724	0.724
15.2725	728.7	0.0118975				0.725	0.725
15.2937	721	0.00123304				0.726	0.726
15.315	725.2	0.00709361				0.727	0.727
15.3362	726.8	0.00934376				0.728	0.728
15.3574	737.4	0.0240931				0.729	0.729
15.3786	722.2	0.00301157				0.73	0.73
15.3998	724.6	0.00637289				0.731	0.731
15.421	719.2	-0.00109907				0.732	0.732
15.4422	721.4	0.00198453				0.733	0.733
15.4634	726.2	0.00867966				0.734	0.734
15.4847	726.7	0.00940236				0.735	0.735
15.5059	730.8	0.0151257				0.736	0.736
15.5271	724.6	0.00654169				0.737	0.737
15.5483	724.5	0.00643092				0.738	0.738
15.5695	716.7	-0.00437653				0.739	0.739
15.5907	732.1	0.0170452				0.74	0.74
15.6119	725.8	0.00832136				0.741	0.741
15.6331	717.3	-0.00345944				0.742	0.742
15.6543	718.7	-0.00148651				0.743	0.743
15.6756	727.5	0.0107679				0.744	0.744
15.6968	725.3	0.00773944				0.745	0.745
15.718	718.3	-0.00195853				0.746	0.746
15.7392	713	-0.00929491				0.747	0.747
15.7604	717.1	-0.00357014				0.748	0.748
15.7816	723.7	0.00562886				0.749	0.749
15.8028	723	0.00468426				0.75	0.75
15.824	719.6	-1.24344e-05				0.751	0.751
15.8453	734.9	0.0212777				0.752	0.752
15.8665	722.5	0.00407369				0.753	0.753
15.8877	737.2	0.0245313				0.754	0.754
15.9089	718.6	-0.00129036				0.755	0.755
15.9301	724.9	0.00749356				0.756	0.756
15.9513	714.2	-0.00734994				0.757	0.757
15.9725	722.8	0.0046311				0.758	0.758
15.9937	716.1	-0.0046535				0.759	0.759
16.015	735.2	0.0219232				0.76	0.76
16.0362	719.5	0.000128302				0.761	0.761
16.0574	720.6	0.00168536				0.762	0.762
16.0786	724.2	0.00671778				0.763	0.763
16.0998	728.8	0.0131406				0.764	0.764
16.121	722.4	0.00427177				0.765	0.765
16.1422	726.9	0.0105559				0.766	0.766
16.1634	725.2	0.00822071				0.767	0.767
16.1846	720.8	0.00213158				0.768	0.768
16.2059	731.6	0.0171753				0.769	0.769
16.2271	716.7	-0.0035129				0.77	0.77
16.2483	729.6	0.0144514				0.771	0.771
16.2695	736.5	0.024074				0.772	0.772
16.2907	717.8	-0.0018997				0.773	0.773
16.3119	727.3	0.0113383				0.774	0.774
16.3331	715.2	-0.00545933				0.775	0.775
16.3543	716.4	-0.00376276				0.776	0.776
16.3756	721.8	0.00377466				0.777	0.777
16.3968	722.6	0.0049153				0.778	0.778
16.418	728.4	0.0130097				0.779	0.779
16.4392	717.2	-0.00253861				0.78	0.78
16.4604	731.5	0.0173779				0.781	0.781
16.4816	722.4	0.00474965				0.782	0.782
16.5028	724.6	0.00783773				0.783	0.783
16.524	720.5	0.00216314				0.784	0.784
16.5452	730.1	0.0155445				0.785	0.785
16.5665	718.5	-0.000562766				0.786	0.786
16.5877	731.1	0.0169924				0.787	0.787
16.6089	726.4	0.0104827				0.788	0.788
16.6301	733.4	0.0202489				0.789	0.789
16.6513	727	0.011374				0.79	0.79
16.6725	710.4	-0.0116916				0.791	0.791
16.6937	724.7	0.00823081				0.792	0.792
16.7149	723.5	0.00658951				0.793	0.793
16.7362	721	0.0031394				0.794	0.794
16.7574	729	0.0142983				0.795	0.795
16.7786	735	0.0226751				0.796	0.796
16.7998	739.6	0.0291043				0.797	0.797
16.821	730.7	0.0167491				0.798	0.798
16.8422	720.2	0.00216665				0.799	0.799
16.8634	728.7	0.0140229				0.8	0.8
16.8846	733.1	0.0201743				0.801	0.801
16.9058	722.9	0.00600825				0.802	0.802
16.9271	729.6	0.0153606				0.803	0.803
16.9483	720	0.00202865				0.804	0.804
16.9695	715.6	-0.00406696				0.805	0.805
16.9907	721.6	0.00431164				0.806	0.806
17.0119	716.2	-0.00317607				0.807	0.807
17.0331	723.1	0.0064557				0.808	0.808
17.0543	722.4	0.00550956				0.809	0.809
17.0755	719.2	0.00108352				0.81	0.81
17.0968	720.7	0.00319953				0.811	0.811
17.118	722.3	0.00545487				0.812	0.812
17.1392	712.1	-0.00871595				0.813	0.813
17.1604	715.6	-0.00381584				0.814	0.814
17.1816	724.1	0.00804522				0.815	0.815
17.2028	723.3	0.00695972				0.816	0.816
17.224	718.8	0.000722973				0.817	0.817
17.2452	727.3	0.0125852				0.818	0.818
17.2664	728.6	0.0144235				0.819	0.819
17.2877	722.3	0.00568025				0.82	0.82
17.3089	739.3	0.0293787				0.821	0.821
17.3301	725.1	0.00963536				0.822	0.822
17.3513	725	0.00952441				0.823	0.823
17.3725	745.5	0.0380987				0.824	0.824
17.3937	715.6	-0.00350875				0.825	0.825
17.4149	729.2	0.0154581				0.826	0.826
17.4361	725.2	0.0099161				0.827	0.827
17.4574	724.5	0.00896955				0.828	0.828
17.4786	723.6	0.00774442				0.829	0.829
17.4998	724.7	0.00930466				0.83	0.83
17.521	728.9	0.0151825				0.831	0.831
17.5422	719.2	0.00170085				0.832	0.832
17.5634	724.6	0.00925025				0.833	0.833
17.5846	725.6	0.0106714				0.834	0.834
17.6058	728.2	0.0143213				0.835	0.835
17.6271	724.1	0.00863865				0.836	0.836
17.6483	719.7	0.00253775				0.837	0.837
17.6695	731.5	0.0190036				0.838	0.838
17.6907	729.5	0.0162461				0.839	0.839
17.7119	720.3	0.00345794				0.84	0.84
17.7331	735.9	0.0252192				0.841	0.841
17.7543	720.4	0.00365353				0.842	0.842
17.7755	711.7	-0.00843942				0.843	0.843
17.7967	722.3	0.00635702				0.844	0.844
17.818	709.4	-0.0115884				0.845	0.845
17.8392	716.5	-0.00166794				0.846	0.846
17.8604	729.5	0.016474				0.847	0.847
17.8816	720.5	0.00396174				0.848	0.848
17.9028	727.5	0.0137441				0.849	0.849
17.924	723.1	0.00764116				0.85	0.85
17.9452	722.6	0.00697265				0.851	0.851
17.9664	729.8	0.0170347				0.852	0.852
17.9877	733.7	0.0224983				0.853	0.853
18.0089	715.2	-0.0032557				0.854	0.854
18.0301	730.6	0.0182352				0.855	0.855
18.0513	723.3	0.00808948				0.856	0.856
18.0725	726.9	0.0131354				0.857	0.857
18.0937	725.5	0.0112124				0.858	0.858
18.1149	711.5	-0.00827316				0.859	0.859
18.1361	714.8	-0.00364549				0.86	0.86
18.1573	715.6	-0.00250239				0.861	0.861
18.1786	720.6	0.00449544				0.862	0.862
18.1998	721.8	0.00619644				0.863	0.863
18.221	735.6	0.0254625				0.864	0.864
18.2422	733.5	0.0225637				0.865	0.865
18.2634	724.3	0.00976645				0.866	0.866
18.2846	709.4	-0.0109783				0.867	0.867
18.3058	722.7	0.00759238				0.868	0.868
18.327	726.3	0.0126399				0.869	0.869
18.3483	707.1	-0.0141019				0.87	0.87
18.3695	723.2	0.00837437				0.871	0.871
18.3907	736	0.0262505				0.872	0.872
18.4119	714.8	-0.00328201				0.873	0.873
18.4331	713.9	-0.00450904				0.874	0.874
18.4543	720.5	0.00472247				0.875	0.875
18.4755	722.1	0.00698189				0.876	0.876
18.4967	714.3	-0.0038674				0.877	0.877
18.5179	718.7	0.00229679				0.878	0.878
18.5392	716.1	-0.00130113				0.879	0.879
18.5604	722	0.00695548				0.88	0.88
18.5816	721.9	0.00684427				0.881	0.881
18.6028	714.6	-0.00330917				0.882	0.882
18.624	729.4	0.0173617				0.883	0.883
18.6452	714.9	-0.00283476				0.884	0.884
18.6664	718.6	0.00235425				0.885	0.885
18.6876	715	-0.00263928				0.886	0.886
18.7089	722.7	0.00812982				0.887	0.887
18.7301	730.9	0.019597				0.888	0.888
18.7513	725.7	0.0123715				0.889	0.889
18.7725	731.2	0.0200728				0.89	0.89
18.7937	727.7	0.0152186				0.891	0.891
18.8149	717.3	0.000737569				0.892	0.892
18.8361	721.3	0.0063464				0.893	0.893
18.8573	724.9	0.0113975				0.894	0.894
18.8786	719	0.00319382				0.895	0.895
18.8998	722.4	0.00796601				0.896	0.896
18.921	720.4	0.00520364				0.897	0.897
18.9422	728.6	0.016674				0.898	0.898
18.9634	733	0.0228424				0.899	0.899
18.9846	713.7	-0.00406125				0.9	0.9
19.0058	722.9	0.0088053				0.901	0.901
19.027	713.4	-0.00442397				0.902	0.902
19.0482	724.9	0.0116531				0.903	0.903
19.0695	712.3	-0.00590322				0.904	0.904
19.0907	720.1	0.00501081				0.905	0.905
19.1119	718.3	0.00252679				0.906	0.906
19.1331	715.4	-0.00149268				0.907	0.907
19.1543	720	0.00495592				0.908	0.908
19.1755	731.9	0.0215943				0.909	0.909
19.1967	711.6	-0.00671276				0.91	0.91
19.2179	722.7	0.00880952				0.911	0.911
19.2392	721.1	0.00660437				0.912	0.912
19.2604	726.2	0.0137521				0.913	0.913
19.2816	725.3	0.0125242				0.914	0.914
19.3028	733.3	0.023721				0.915	0.915
19.324	719	0.00378572				0.916	0.916
19.3452	724.3	0.0112134				0.917	0.917
19.3664	721.8	0.00775139				0.918	0.918
19.3876	723.1	0.00959477				0.919	0.919
19.4088	723.5	0.0101816				0.92	0.92
19.4301	728.4	0.0170518				0.921	0.921
19.4513	720.4	0.00590981				0.922	0.922
19.4725	729.5	0.018645				0.923	0.923
19.4937	725.5	0.013088				0.924	0.924
19.5149	729.8	0.0191211				0.925	0.925
19.5361	728.1	0.0167758				0.926	0.926
19.5573	709.7	-0.00889157				0.927	0.927
19.5785	721.3	0.00733634				0.928	0.928
19.5998	718.5	0.00345419				0.929	0.929
19.621	718.4	0.00334273				0.93	0.93
19.6422	713.2	-0.00389178				0.931	0.931
19.6634	718.2	0.00311979				0.932	0.932
19.6846	726.2	0.014322				0.933	0.933
19.7058	727.8	0.0165854				0.934	0.934
19.727	713.6	-0.00322104				0.935	0.935
19.7482	714.7	-0.00165646				0.936	0.936
19.7694	721.2	0.00745152				0.937	0.937
19.7907	725.5	0.0134867				0.938	0.938
19.8119	708.6	-0.0100939				0.939	0.939
19.8331	734.3	0.0258376				0.94	0.94
19.8543	712	-0.00528819				0.941	0.941
19.8755	721	0.00731373				0.942	0.942
19.8967	713.9	-0.00257768				0.943	0.943
19.9179	707.4	-0.0116313				0.944	0.944
19.9391	720.3	0.00642065				0.945	0.945
19.9604	710.8	-0.00682505				0.946	0.946
19.9816	724.8	0.0127651				0.947	0.947
20.0028	729.4	0.0192214				0.948	0.948
20.024	721.3	0.00793124				0.949	0.949
20.0452	713.2	-0.00335952				0.95	0.95
20.0664	716.6	0.00141987				0.951	0.951
20.0876	721.5	0.00829579				0.952	0.952
20.1088	721	0.00762538				0.953	0.953
20.1301	725.3	0.0136633				0.954	0.954
20.1513	720.9	0.0075423				0.955	0.955
20.1725	704.5	-0.0153509				0.956	0.956
20.1937	719.9	0.00620128				0.957	0.957
20.2149	726.2	0.0150353				0.958	0.958
20.2361	722	0.00919322				0.959	0.959
20.2573	726.7	0.0157913				0.96	0.96
20.2785	724.9	0.0133038				0.961	0.961
20.2997	699.2	-0.0225936				0.962	0.962
20.321	708.1	-0.0101245				0.963	0.963
20.3422	717	0.00234533				0.964	0.964
20.3634	715.1	-0.000282694				0.965	0.965
20.3846	728	0.0177803				0.966	0.966
20.4058	736.9	0.0302519				0.967	0.967
20.427	720.3	0.00707196				0.968	0.968
20.4482	706	-0.0128935				0.969	0.969
20.4694	722	0.00950559				0.97	0.97
20.4907	709.2	-0.00836356				0.971	0.971
20.5119	720.8	0.00788446				0.972	0.972
20.5331	716.5	0.00190003				0.973	0.973
20.5543	717	0.00262741				0.974	0.974
20.5755	716.5	0.00195642				0.975	0.975
20.5967	707.8	-0.0101818				0.976	0.976
20.6179	718.3	0.00453009				0.977	0.977
20.6391	721.7	0.00931334				0.978	0.978
20.6603	713.3	-0.00240617				0.979	0.979
20.6816	713	-0.00279767				0.98	0.98
20.7028	723.4	0.0117763				0.981	0.981
20.724	720.9	0.00830803				0.982	0.982
20.7452	719.5	0.00637821				0.983	0.983
20.7664	721.6	0.00934393				0.984	0.984
20.7876	720.6	0.00797355				0.985	0.985
20.8088	723.1	0.011499				0.986	0.986
20.83	724	0.0127865				0.987	0.987
20.8513	722	0.0100172				0.988	0.988
20.8725	713	-0.002545				0.989	0.989
20.8937	714.6	-0.000278523				0.99	0.99
20.9149	733.1	0.0256318				0.991	0.991
20.9361	706	-0.0122543				0.992	0.992
20.9573	720.1	0.00750104				0.993	0.993
20.9785	713.5	-0.00170499				0.994	0.994
20.9997	718	0.00461948				0.995	0.995
21.0209	708	-0.00934454				0.996	0.996
21.0422	698	-0.0233093				0.997	0.997
21.0634	717.3	0.00372484				0.998	0.998
21.0846	709.4	-0.00730175				0.999	0.999
21.1058	727.3	0.0177753				1	1
21.127	726.5	0.0166844				1.001	1.001
21.1482	710.2	-0.0060983				1.002	1.002
21.1694	713.2	-0.00187179				1.003	1.003
21.1906	713.8	-0.00100395				1.004	1.004
21.2119	712.2	-0.00321515				1.005	1.005
21.2331	727.3	0.0179473				1.006	1.006
21.2543	708.7	-0.00805782				1.007	1.007
21.2755	713.9	-0.000751416				1.008	1.008
21.2967	721	0.00921491				1.009	1.009
21.3179	711.2	-0.00447453				1.01	1.01
21.3391	722.5	0.0113715				1.011	1.011
21.3603	714.6	0.000341091				1.012	1.012
21.3815	710.3	-0.0056503				1.013	1.013
21.4028	705.5	-0.012342				1.014	1.014
21.424	707.6	-0.00937422				1.015	1.015
21.4452	724.1	0.013754				1.016	1.016
21.4664	707	-0.0101584				1.017	1.017
21.4876	711.9	-0.00327006				1.018	1.018
21.5088	709.9	-0.00604225				1.019	1.019
21.53	714.2	6.5247e-06				1.02	1.02
21.5512	718.5	0.00605564				1.021	1.021
21.5725	696.7	-0.0244416				1.022	1.022
21.5937	720.3	0.00863287				1.023	1.023
21.6149	724.1	0.0139826				1.024	1.024
21.6361	715	0.00126774				1.025	1.025
21.6573	726	0.0167005				1.026	1.026
21.6785	714	-7.62764e-05				1.027	1.027
21.6997	717.6	0.00499368				1.028	1.028
21.7209	723.1	0.0127249				1.029	1.029
21.7422	717.5	0.00491028				1.03	1.03
21.7634	716.3	0.00325787				1.031	1.031
21.7846	711.8	-0.00301678				1.032	1.032
21.8058	723.6	0.0135395				1.033	1.033
21.827	723.8	0.0138482				1.034	1.034
21.8482	721.4	0.0105149				1.035	1.035
21.8694	705.7	-0.0114493				1.036	1.036
21.8906	713.2	-0.000915057				1.037	1.037
21.9118	717.9	0.00569728				1.038	1.038
21.9331	715.7	0.0026436				1.039	1.039
21.9543	706.1	-0.0107774				1.04	1.04
21.9755	728.1	0.0200726				1.041	1.041
21.9967	716.2	0.00342893				1.042	1.042
22.0179	714.7	0.0013556				1.043	1.043
22.0391	707.3	-0.00898449				1.044	1.044
22.0603	731.7	0.0252319				1.045	1.045
22.0815	718.1	0.0062044				1.046	1.046
22.1028	722.2	0.0119779				1.047	1.047
22.124	709.2	-0.00621026				1.048	1.048
22.1452	717.7	0.005729				1.049	1.049
22.1664	721.8	0.0115029				1.05	1.05
22.1876	719.2	0.00788783				1.051	1.051
22.2088	716.3	0.00385208				1.052	1.052
22.23	703.5	-0.0140586				1.053	1.053
22.2512	720.1	0.00923449				1.054	1.054
22.2724	717.9	0.00617952				1.055	1.055
22.2937	708.4	-0.00710729				1.056	1.056
22.3149	716.7	0.00455432				1.057	1.057
22.3361	710.1	-0.00466842				1.058	1.058
22.3573	720.7	0.0102179				1.059	1.059
22.3785	716.3	0.00407863				1.06	1.06
22.3997	732.7	0.0270964				1.061	1.061
22.4209	719.7	0.00890153				1.062	1.062
22.4421	715.5	0.00304212				1.063	1.063
22.4634	724.2	0.0152671				1.064	1.064
22.4846	727	0.0192212				1.065	1.065
22.5058	716.8	0.00494961				1.066	1.066
22.527	713.4	0.000211051				1.067	1.067
22.5482	716.8	0.00500632				1.068	1.068
22.5694	724.2	0.0154103				1.069	1.069
22.5906	714.3	0.00155766				1.07	1.07
22.6118	704.8	-0.0117349				1.071	1.071
22.633	716.2	0.00427843				1.072	1.072
22.6543	706.6	-0.00915504				1.073	1.073
22.6755	718.9	0.00812135				1.074	1.074
22.6967	699.9	-0.0184949				1.075	1.075
22.7179	718.8	0.00803802				1.076	1.076
22.7391	716.9	0.00540185				1.077	1.077
22.7603	721.2	0.0114608				1.078	1.078
22.7815	711.1	-0.00267594				1.079	1.079
22.8027	719.3	0.0088531				1.08	1.08
22.824	709.3	-0.0051443				1.081	1.081
22.8452	713.6	0.000915083				1.082	1.082
22.8664	709.7	-0.00452707				1.083	1.083
22.8876	712.5	-0.000571384				1.084	1.084
22.9088	707.3	-0.00783745				1.085	1.085
22.93	710.3	-0.00360108				1.086	1.086
22.9512	709.5	-0.00469521				1.087	1.087
22.9724	711.7	-0.00158081				1.088	1.088
22.9937	709.9	-0.00407785				1.089	1.089
23.0149	711.1	-0.0023662				1.09	1.09
23.0361	697.5	-0.0214186				1.091	1.091
23.0573	713.1	0.000496187				1.092	1.092
23.0785	715.8	0.00431271				1.093	1.093
23.0997	702.5	-0.0143202				1.094	1.094
23.1209	696.6	-0.0225709				1.095	1.095
23.1421	702.6	-0.0141242				1.096	1.096
23.1633	705.7	-0.00974639				1.097	1.097
23.1846	710.2	-0.00340374				1.098	1.098
23.2058	728.5	0.0223048				1.099	1.099
23.227	708.8	-0.00531213				1.1	1.1
23.2482	715	0.00341692				1.101	1.101
23.2694	707	-0.0077821				1.102	1.102
23.2906	708.8	-0.00522785				1.103	1.103
23.3118	715	0.00350195				1.104	1.104
23.333	704.8	-0.0107858				1.105	1.105
23.3543	708.5	-0.00556462				1.106	1.106
23.3755	713	0.000779751				1.107	1.107
23.3967	715.8	0.00473826				1.108	1.108
23.4179	710.9	-0.00211147				1.109	1.109
23.4391	722.7	0.0144808				1.11	1.11
23.4603	718.6	0.00875399				1.111	1.111
23.4815	711.2	-0.00160575				1.112	1.112
23.5027	705.2	-0.0100007				1.113	1.113
23.5239	703.7	-0.0120786				1.114	1.114
23.5452	723.7	0.0160281				1.115	1.115
23.5664	714.5	0.00314021				1.116	1.116
23.5876	723.3	0.0155239				1.117	1.117
23.6088	718.9	0.00937474				1.118	1.118
23.63	709.6	-0.00365482				1.119	1.119
23.6512	715.7	0.00493855				1.12	1.12
23.6724	720.5	0.011707				1.121	1.121
23.6936	717.7	0.00780378				1.122	1.122
23.7149	714.2	0.00291738				1.123	1.123
23.7361	730.9	0.0263974				1.124	1.124
23.7573	714.6	0.0035358				1.125	1.125
23.7785	709.9	-0.00303639				1.126	1.126
23.7997	709.1	-0.00413174				1.127	1.127
23.8209	714.3	0.00319955				1.128	1.128
23.8421	713.7	0.00238522				1.129	1.129
23.8633	707.2	-0.0067159				1.13	1.13
23.8845	710.3	-0.00233365				1.131	1.131
23.9058	717.7	0.00808866				1.132	1.132
23.927	723.5	0.0162641				1.133	1.133
23.9482	722	0.0141858				1.134	1.134
23.9694	716.2	0.00606706				1.135	1.135
23.9906	713.2	0.0018812				1.136	1.136
24.0118	719.4	0.0106193				1.137	1.137
24.033	718.5	0.00938355				1.138	1.138
24.0542	710.5	-0.00182702				1.139	1.139
24.0755	716.6	0.00677126				1.14	1.14
24.0967	697.1	-0.0205971				1.141	1.141
24.1179	717.1	0.0075307				1.142	1.142
24.1391	710.8	-0.00129261				1.143	1.143
24.1603	706.2	-0.00772776				1.144	1.144
24.1815	721.5	0.0137987				1.145	1.145
24.2027	719	0.0103145				1.146	1.146
24.2239	712.3	0.000928176				1.147	1.147
24.2452	722	0.0145874				1.148	1.148
24.2664	719.9	0.011665				1.149	1.149
24.2876	707.7	-0.00545139				1.15	1.15
24.3088	720	0.0118627				1.151	1.151
24.33	716.4	0.00683188				1.152	1.152
24.3512	712.1	0.000816952				1.153	1.153
24.3724	716.6	0.00716994				1.154	1.154
24.3936	714.6	0.00438738				1.155	1.155
24.4148	713.8	0.00329134				1.156	1.156
24.4361	705.3	-0.00862791				1.157	1.157
24.4573	718.7	0.0102358				1.158	1.158
24.4785	716.2	0.00675013				1.159	1.159
24.4997	721.7	0.0145101				1.16	1.16
24.5209	697.8	-0.0190589				1.161	1.161
24.5421	707.6	-0.00525433				1.162	1.162
24.5633	711.7	0.000537771				1.163	1.163
24.5845	717.8	0.00914196				1.164	1.164
24.6058	712.1	0.00115676				1.165	1.165
24.627	714.3	0.0042782				1.166	1.166
24.6482	714.9	0.00515022				1.167	1.167
24.6694	708	-0.00452302				1.168	1.168
24.6906	701.2	-0.0140562				1.169	1.169
24.7118	707.8	-0.00474791				1.17	1.17
24.733	703.2	-0.0111881				1.171	1.171
24.7542	713.8	0.00374563				1.172	1.172
24.7754	718.2	0.00996149				1.173	1.173
24.7967	713.8	0.00380244				1.174	1.174
24.8179	708.7	-0.00334138				1.175	1.175
24.8391	719.5	0.0118755				1.176	1.176
24.8603	715	0.00557535				1.177	1.177
24.8815	710	-0.00142838				1.178	1.178
24.9027	708.7	-0.00322854				1.179	1.179
24.9239	718.7	0.0108649				1.18	1.18
24.9451	704.2	-0.00950162				1.181	1.181
24.9664	710	-0.00131531				1.182	1.182
24.9876	707.2	-0.00522563				1.183	1.183
25.0088	711.5	0.00085125				1.184	1.184
25.03	713.3	0.00341168				1.185	1.185
25.0512	699.7	-0.0156918				1.186	1.186
25.0724	718.6	0.0109245				1.187	1.187
25.0936	708.1	-0.00381865				1.188	1.188
25.1148	714.5	0.00521357				1.189	1.189
25.136	707.9	-0.00404362				1.19	1.19
25.1573	700	-0.0151304				1.191	1.191
25.1785	704.7	-0.00848961				1.192	1.192
25.1997	708.3	-0.0033962				1.193	1.193
25.2209	715	0.00605943				1.194	1.194
25.2421	694	-0.0234615				1.195	1.195
25.2633	706.9	-0.00528155				1.196	1.196
25.2845	715	0.0061449				1.197	1.197
25.3057	712.3	0.00237386				1.198	1.198
25.327	707.2	-0.00477485				1.199	1.199
25.3482	706.2	-0.00615398				1.2	1.2
25.3694	706.2	-0.00612583				1.201	1.201
25.3906	695.3	-0.0214383				1.202	1.202
25.4118	716.1	0.00786407				1.203	1.203
25.433	719.3	0.0123965				1.204	1.204
25.4542	707.4	-0.0043242				1.205	1.205
25.4754	715	0.00640141				1.206	1.206
25.4966	718	0.0106527				1.207	1.207
25.5179	711.8	0.001954				1.208	1.208
25.5391	719	0.0121176				1.209	1.209
25.5603	698.9	-0.0161487				1.21	1.21
25.5815	708.5	-0.00260642				1.211	1.211
25.6027	708.3	-0.00285973				1.212	1.212
25.6239	715.5	0.00730493				1.213	1.213
25.6451	712.6	0.00325064				1.214	1.214
25.6663	712.8	0.00356064				1.215	1.215
25.6876	714.7	0.00626419				1.216	1.216
25.7088	718	0.0109391				1.217	1.217
25.73	710.4	0.000266678				1.218	1.218
25.7512	705.5	-0.00660453				1.219	1.219
25.7724	706.5	-0.00516827				1.22	1.22
25.7936	708.1	-0.00288703				1.221	1.221
25.8148	726.1	0.0224887				1.222	1.222
25.836	711.2	0.001535				1.223	1.223
25.8573	711.2	0.00156339				1.224	1.224
25.8785	701.2	-0.0124913				1.225	1.225
25.8997	712.4	0.00331019				1.226	1.226
25.9209	715.4	0.0075638				1.227	1.227
25.9421	711.6	0.00224032				1.228	1.228
25.9633	704.4	-0.00787227				1.229	1.229
25.9845	705.2	-0.00671734				1.23	1.23
26.0057	713.4	0.00486094				1.231	1.231
26.0269	710.5	0.000804512				1.232	1.232
26.0482	707.6	-0.00325215				1.233	1.233
26.0694	709.9	1.60535e-05				1.234	1.234
26.0906	707.9	-0.00277302				1.235	1.235
26.1118	717.1	0.0102158				1.236	1.236
26.133	708.9	-0.00130768				1.237	1.237
26.1542	709.2	-0.000856716				1.238	1.238
26.1754	710.7	0.00128492				1.239	1.239
26.1966	708.3	-0.00206808				1.24	1.24
26.2179	708.7	-0.0014762				1.241	1.241
26.2391	707.5	-0.00313868				1.242	1.242
26.2603	705.2	-0.00635118				1.243	1.243
26.2815	702.8	-0.00970477				1.244	1.244
26.3027	711	0.00187802				1.245	1.245
26.3239	719.8	0.014307				1.246	1.246
26.3451	697.1	-0.0176529				1.247	1.247
26.3663	710.2	0.000835879				1.248	1.248
26.3875	698.6	-0.0154833				1.249	1.249
26.4088	716.4	0.00963038				1.25	1.25
26.43	711.2	0.00233039				1.251	1.251
26.4512	720	0.0147615				1.252	1.252
26.4724	708	-0.00212293				1.253	1.253
26.4936	710.4	0.00128811				1.254	1.254
26.5148	710.4	0.00131651				1.255	1.255
26.536	720.2	0.0151585				1.256	1.256
26.5572	716	0.00926703				1.257	1.257
26.5785	703.8	-0.00790183				1.258	1.258
26.5997	716.7	0.0103111				1.259	1.259
26.6209	695.8	-0.0191232				1.26	1.26
26.6421	719.6	0.0144567				1.261	1.261
26.6633	704.8	-0.00637945				1.262	1.262
26.6845	717.1	0.0109897				1.263	1.263
26.7057	706.9	-0.00336234				1.264	1.264
26.7269	705.3	-0.00558992				1.265	1.265
26.7481	704.5	-0.00668966				1.266	1.266
26.7694	719.3	0.0142064				1.267	1.267
26.7906	708.1	-0.00155718				1.268	1.268
26.8118	707	-0.00307992				1.269	1.269
26.833	697	-0.0171527				1.27	1.27
26.8542	713.9	0.0067067				1.271	1.271
26.8754	709.2	0.000107377				1.272	1.272
26.8966	714.3	0.00732794				1.273	1.273
26.9178	696.2	-0.0181694				1.274	1.274
26.9391	714.9	0.00823131				1.275	1.275
26.9603	707.7	-0.0018946				1.276	1.276
26.9815	703.9	-0.00722576				1.277	1.277
27.0027	712.8	0.00535526				1.278	1.278
27.0239	711.2	0.00312704				1.279	1.279
27.0451	705.1	-0.0054486				1.28	1.28
27.0663	705.8	-0.00443298				1.281	1.281
27.0875	701	-0.0111756				1.282	1.282
27.1088	706.5	-0.00338902				1.283	1.283
27.13	715.8	0.00975852				1.284	1.284
27.1512	700.7	-0.0115146				1.285	1.285
27.1724	713.5	0.00657113				1.286	1.286
27.1936	709.9	0.00152086				1.287	1.287
27.2148	718.2	0.0132592				1.288	1.288
27.236	708.3	-0.000679662				1.289	1.289
27.2572	713.5	0.00668545				1.29	1.29
27.2784	712.7	0.00558528				1.291	1.291
27.2997	712.6	0.00547273				1.292	1.292
27.3209	706	-0.00381153				1.293	1.293
27.3421	700	-0.0122497				1.294	1.294
27.3633	709	0.000478391				1.295	1.295
27.3845	709.2	0.000789035				1.296	1.296
27.4057	699.3	-0.0131533				1.297	1.297
27.4269	697.6	-0.0155244				1.298	1.298
27.4481	701.6	-0.00985136				1.299	1.299
27.4694	702.2	-0.00897645				1.3	1.3
27.4906	701.2	-0.0103597				1.301	1.301
27.5118	697.1	-0.0161183				1.302	1.302
27.533	711.6	0.00437546				1.303	1.303
27.5542	710.7	0.00313367				1.304	1.304
27.5754	708.8	0.000480291				1.305	1.305
27.5966	703	-0.0076783				1.306	1.306
27.6178	709.6	0.00166641				1.307	1.307
27.639	700.7	-0.0108687				1.308	1.308
27.6603	712.4	0.00567601				1.309	1.309
27.6815	702.2	-0.0086949				1.31	1.31
27.7027	702.1	-0.00880791				1.311	1.311
27.7239	708.7	0.000538093				1.312	1.312
27.7451	707	-0.0018336				1.313	1.313
27.7663	718	0.0137254				1.314	1.314
27.7875	697.6	-0.0150489				1.315	1.315
27.8087	704.7	-0.004996				1.316	1.316
27.83	708.3	0.000115453				1.317	1.317
27.8512	712.8	0.00649803				1.318	1.318
27.8724	699.3	-0.0125364				1.319	1.319
27.8936	696.5	-0.0164622				1.32	1.32
27.9148	712.1	0.00559533				1.321	1.321
27.936	700.9	-0.0101927				1.322	1.322
27.9572	707	-0.00154991				1.323	1.323
27.9784	704.4	-0.00519344				1.324	1.324
27.9996	693.8	-0.0201357				1.325	1.325
28.0209	715	0.00983408				1.326	1.326
28.0421	704.6	-0.00482613				1.327	1.327
28.0633	707.7	-0.000419295				1.328	1.328
28.0845	696.5	-0.0162106				1.329	1.329
28.1057	690.9	-0.0240927				1.33	1.33
28.1269	708.2	0.00037223				1.331	1.331
28.1481	706.5	-0.00200074				1.332	1.332
28.1693	704.9	-0.00423259				1.333	1.333
28.1906	706	-0.00265034				1.334	1.334
28.2118	710.9	0.00430033				1.335	1.335
28.233	713.1	0.00743695				1.336	1.336
28.2542	709.2	0.00195569				1.337	1.337
28.2754	700	-0.0110139				1.338	1.338
28.2966	701.6	-0.0087252				1.339	1.339
28.3178	685.8	-0.0310211				1.34	1.34
28.339	701.5	-0.00881012				1.341	1.341
28.3603	716.1	0.0118478				1.342	1.342
28.3815	705.3	-0.00338421				1.343	1.343
28.4027	705	-0.00377979				1.344	1.344
28.4239	706.1	-0.00219703				1.345	1.345
28.4451	696.7	-0.0154523				1.346	1.346
28.4663	702.6	-0.00708647				1.347	1.347
28.4875	708.5	0.00127988				1.348	1.348
28.5087	706.5	-0.0015182				1.349	1.349
28.5299	709.6	0.00289149				1.35	1.35
28.5512	711.2	0.0051814				1.351	1.351
28.5724	699.8	-0.0109028				1.352	1.352
28.5936	702.4	-0.00719969				1.353	1.353
28.6148	699.8	-0.0108465				1.354	1.354
28.636	708.6	0.00162062				1.355	1.355
28.6572	703.6	-0.00541869				1.356	1.356
28.6784	701.7	-0.00807624				1.357	1.357
28.6996	705.8	-0.00225209				1.358	1.358
28.7209	698.4	-0.0126849				1.359	1.359
28.7421	707.1	-0.000357476				1.36	1.36
28.7633	708.7	0.00193298				1.361	1.361
28.7845	719.5	0.0172306				1.362	1.362
28.8057	710	0.003828				1.363	1.363
28.8269	724.4	0.0242165				1.364	1.364
28.8481	709.1	0.00261259				1.365	1.365
28.8693	710	0.00391369				1.366	1.366
28.8905	710.8	0.00507346				1.367	1.367
28.9118	696	-0.0158258				1.368	1.368
28.933	703.1	-0.00575778				1.369	1.369
28.9542	701.3	-0.00827491				1.37	1.37
28.9754	692.5	-0.0206913				1.371	1.371
28.9966	711	0.00549933				1.372	1.372
29.0178	705.2	-0.00267467				1.373	1.373
29.039	704.7	-0.00335343				1.374	1.374
29.0602	709	0.00275654				1.375	1.375
29.0815	709.4	0.00335083				1.376	1.376
29.1027	685.8	-0.0300006				1.377	1.377
29.1239	699.5	-0.0105951				1.378	1.378
29.1451	706.2	-0.00108984				1.379	1.379
29.1663	695	-0.0169041				1.38	1.38
29.1875	699.9	-0.00994474				1.381	1.381
29.2087	696.3	-0.0150091				1.382	1.382
29.2299	699.2	-0.0108786				1.383	1.383
29.2511	707.3	0.000608509				1.384	1.384
29.2724	712	0.00728622				1.385	1.385
29.2936	701.1	-0.00810607				1.386	1.386
29.3148	706.7	-0.000154905				1.387	1.387
29.336	695.6	-0.0158313				1.388	1.388
29.3572	696.8	-0.0141054				1.389	1.389
29.3784	696.2	-0.0149262				1.39	1.39
29.3996	708.9	0.00307191				1.391	1.391
29.4208	709.2	0.00352498				1.392	1.392
29.4421	712	0.0075157				1.393	1.393
29.4633	693	-0.0193423				1.394	1.394
29.4845	696.8	-0.0139369				1.395	1.395
29.5057	717	0.0146776				1.396	1.396
29.5269	705.2	-0.00199296				1.397	1.397
29.5481	706.8	0.000299872				1.398	1.398
29.5693	704.7	-0.00264375				1.399	1.399
29.5905	707.1	0.000781455				1.4	1.4
29.6117	707.3	0.00109304				1.401	1.401
29.633	709.8	0.00466008				1.402	1.402
29.6542	709.1	0.00369789				1.403	1.403
29.6754	700.9	-0.00788057				1.404	1.404
29.6966	708.7	0.00318886				1.405	1.405
29.7178	695.2	-0.0158928				1.406	1.406
29.739	695.7	-0.015157				1.407	1.407
29.7602	701	-0.00762594				1.408	1.408
29.7814	698	-0.0118448				1.409	1.409
29.8027	706.1	-0.000349142				1.41	1.41
29.8239	695	-0.0160358				1.411	1.411
29.8451	705.4	-0.00128325				1.412	1.412
29.8663	697	-0.013148				1.413	1.413
29.8875	704	-0.00320859				1.414	1.414
29.9087	709.4	0.00446588				1.415	1.415
29.9299	700.5	-0.0081077				1.416	1.416
29.9511	701.2	-0.00708822				1.417	1.417
29.9724	703.3	-0.0040862				1.418	1.418
29.9936	708.4	0.00316429				1.419	1.419
30.0148	705	-0.001622				1.42	1.42
30.036	698.9	-0.0102322				1.421	1.421
30.0572	703.5	-0.00368942				1.422	1.422
30.0784	697.7	-0.0118753				1.423	1.423
30.0996	709.6	0.00500681				1.424	1.424
30.1208	716.5	0.0148082				1.425	1.425
30.142	711.2	0.00733032				1.426	1.426
30.1633	710.2	0.00594261				1.427	1.427
30.1845	697.5	-0.0120178				1.428	1.428
30.2057	691.1	-0.0210552				1.429	1.429
30.2269	696.4	-0.0135196				1.43	1.43
30.2481	704.2	-0.00244218				1.431	1.431
30.2693	699	-0.00978018				1.432	1.432
30.2905	695.6	-0.0145686				1.433	1.433
30.3117	696	-0.0139738				1.434	1.434
30.333	694.2	-0.0164959				1.435	1.435
30.3542	706.9	0.00152536				1.436	1.436
30.3754	693.6	-0.0172899				1.437	1.437
30.3966	719.9	0.0200017				1.438	1.438
30.4178	697.8	-0.0112828				1.439	1.439
30.439	699.6	-0.00870411				1.44	1.44
30.4602	691.4	-0.0202951				1.441	1.441
30.4814	702.9	-0.00397139				1.442	1.442
30.5026	699.3	-0.00904442				1.443	1.443
30.5239	700.7	-0.00703221				1.444	1.444
30.5451	699.3	-0.0089879				1.445	1.445
30.5663	697	-0.0122192				1.446	1.446
30.5875	703.5	-0.00297901				1.447	1.447
30.6087	693.7	-0.0168398				1.448	1.448
30.6299	696.7	-0.0125598				1.449	1.449
30.6511	702.3	-0.00459451				1.45	1.45
30.6723	700.3	-0.0074009				1.451	1.451
30.6936	693.4	-0.0171529				1.452	1.452
30.7148	703.1	-0.00337535				1.453	1.453
30.736	707.5	0.00289014				1.454	1.454
30.7572	702.2	-0.00459428				1.455	1.455
30.7784	700.6	-0.00683403				1.456	1.456
30.7996	709.3	0.00552772				1.457	1.457
30.8208	706.8	0.00201222				1.458	1.458
30.842	699.4	-0.00845028				1.459	1.459
30.8632	699.7	-0.00799666				1.46	1.46
30.8845	698.9	-0.00910259				1.461	1.461
30.9057	697.7	-0.0107757				1.462	1.462
30.9269	701.8	-0.0049342				1.463	1.463
30.9481	712.1	0.00969874				1.464	1.464
30.9693	705.9	0.000936216				1.465	1.465
30.9905	697	-0.0116554				1.466	1.466
31.0117	697.9	-0.010351				1.467	1.467
31.0329	701.4	-0.00535944				1.468	1.468
31.0542	705.2	5.77971e-05				1.469	1.469
31.0754	702.2	-0.00416814				1.47	1.47
31.0966	704.6	-0.000736037				1.471	1.471
31.1178	699.8	-0.00751507				1.472	1.472
31.139	696.8	-0.0117416				1.473	1.473
31.1602	696	-0.012848				1.474	1.474
31.1814	701.5	-0.00501887				1.475	1.475
31.2026	701.8	-0.00456494				1.476	1.476
31.2239	692	-0.0184373				1.477	1.477
31.2451	698.3	-0.0094728				1.478	1.478
31.2663	692.4	-0.0178138				1.479	1.479
31.2875	694	-0.0155161				1.48	1.48
31.3087	695.5	-0.0133601				1.481	1.481
31.3299	703.2	-0.00240832				1.482	1.482
31.3511	699.7	-0.00734524				1.483	1.483
31.3723	692.9	-0.0169642				1.484	1.484
31.3935	692.3	-0.0177874				1.485	1.485
31.4148	690.5	-0.0203132				1.486	1.486
31.436	700.9	-0.00552924				1.487	1.487
31.4572	704.5	-0.000392848				1.488	1.488
31.4784	696.3	-0.0119995				1.489	1.489
31.4996	697.9	-0.00970096				1.49	1.49
31.5208	689.5	-0.0215924				1.491	1.491
31.542	694	-0.0151787				1.492	1.492
31.5632	710.8	0.00869017				1.493	1.493
31.5845	701.9	-0.0039113				1.494	1.494
31.6057	692.8	-0.0167973				1.495	1.495
31.6269	692.8	-0.0167692				1.496	1.496
31.6481	693.8	-0.0153219				1.497	1.497
31.6693	698.8	-0.0081973				1.498	1.498
31.6905	692.8	-0.016685				1.499	1.499
31.7117	698.1	-0.00913421				1.5	1.5
31.7329	696.7	-0.0110931				1.501	1.501
31.7541	699.5	-0.00709036				1.502	1.502
31.7754	692.3	-0.0172824				1.503	1.503
31.7966	693.7	-0.0152669				1.504	1.504
31.8178	681	-0.0332674				1.505	1.505
31.839	707.8	0.00480595				1.506	1.506
31.8602	701.4	-0.00425116				1.507	1.507
31.8814	700	-0.00621029				1.508	1.508
31.9026	704.1	-0.000360964				1.509	1.509
31.9238	707.8	0.00492079				1.51	1.51
31.9451	697.3	-0.00995862				1.511	1.511
31.9663	697.1	-0.0102143				1.512	1.512
31.9875	705.9	0.00230912				1.513	1.513
32.0087	704	-0.000360128				1.514	1.514
32.0299	695.1	-0.0129694				1.515	1.515
32.0511	707.5	0.00466709				1.516	1.516
32.0723	693.7	-0.0149011				1.517	1.517
32.0935	700.6	-0.00507421				1.518	1.518
32.1147	702.1	-0.00291556				1.519	1.519
32.136	693.7	-0.0148166				1.52	1.52
32.1572	699.8	-0.00612508				1.521	1.521
32.1784	691.9	-0.0173168				1.522	1.522
32.1996	692.5	-0.0164365				1.523	1.523
32.2208	684.6	-0.0276292				1.524	1.524
32.242	695.6	-0.0119771				1.525	1.525
32.2632	698.4	-0.00797163				1.526	1.526
32.2844	690.9	-0.0185968				1.527	1.527
32.3057	699	-0.0070626				1.528	1.528
32.3269	698.2	-0.00817066				1.529	1.529
32.3481	698.8	-0.00728994				1.53	1.53
32.3693	698.2	-0.00811394				1.531	1.531
32.3905	701	-0.0041077				1.532	1.532
32.4117	699.2	-0.00663651				1.533	1.533
32.4329	692.7	-0.015843				1.534	1.534
32.4541	700.6	-0.00459059				1.535	1.535
32.4754	698.3	-0.00783005				1.536	1.536
32.4966	694.2	-0.0136273				1.537	1.537
32.5178	700.3	-0.00493147				1.538	1.538
32.539	691.8	-0.0169812				1.539	1.539
32.5602	698.3	-0.00771655				1.54	1.54
32.5814	693.3	-0.0147934				1.541	1.541
32.6026	709.6	0.00839841				1.542	1.542
32.6238	688.9	-0.02099				1.543	1.543
32.645	689.1	-0.0206777				1.544	1.544
32.6663	692.4	-0.0159597				1.545	1.545
32.6875	704.3	0.000981192				1.546	1.546
32.7087	690.5	-0.0186039				1.547	1.547
32.7299	704.5	0.00132272				1.548	1.548
32.7511	700.8	-0.00390769				1.549	1.549
32.7723	703.1	-0.000609959				1.55	1.55
32.7935	713.8	0.0146281				1.551	1.551
32.8147	682	-0.0305461				1.552	1.552
32.836	700	-0.00493092				1.553	1.553
32.8572	698.5	-0.00703481				1.554	1.554
32.8784	698.5	-0.0070064				1.555	1.555
32.8996	694.7	-0.0123803				1.556	1.556
32.9208	694.8	-0.0122098				1.557	1.557
32.942	693.5	-0.0140298				1.558	1.558
32.9632	685.8	-0.0249492				1.559	1.559
32.9844	693	-0.0146843				1.56	1.56
33.0056	694.8	-0.0120968				1.561	1.561
33.0269	704.1	0.00115511				1.562	1.562
33.0481	692.1	-0.0158794				1.563	1.563
33.0693	692.9	-0.0147137				1.564	1.564
33.0905	706.7	0.0049383				1.565	1.565
33.1117	698.6	-0.00655159				1.566	1.566
33.1329	696.5	-0.00950956				1.567	1.567
33.1541	700.7	-0.00350824				1.568	1.568
33.1753	704.1	0.00135569				1.569	1.569
33.1966	714.1	0.0156065				1.57	1.57
33.2178	696.8	-0.00896948				1.571	1.571
33.239	698	-0.00723435				1.572	1.572
33.2602	703	-9.42308e-05				1.573	1.573
33.2814	698.8	-0.00603961				1.574	1.574
33.3026	702.3	-0.00103268				1.575	1.575
33.3238	707.6	0.00653497				1.576	1.576
33.345	705.5	0.00357653				1.577	1.577
33.3662	718.2	0.0216716				1.578	1.578
33.3875	712	0.0128808				1.579	1.579
33.4087	694	-0.0126975				1.58	1.58
33.4299	700.4	-0.00356414				1.581	1.581
33.4511	700.2	-0.00382015				1.582	1.582
33.4723	703.9	0.00147254				1.583	1.583
33.4935	716.9	0.0199975				1.584	1.584
33.5147	704.2	0.00195674				1.585	1.585
33.5359	709	0.00881521				1.586	1.586
33.5572	711.7	0.012686				1.587	1.587
33.5784	719.2	0.0233871				1.588	1.588
33.5996	712.2	0.0134555				1.589	1.589
33.6208	707.2	0.00636932				1.59	1.59
33.642	729.5	0.0381327				1.591	1.591
33.6632	724.8	0.0314738				1.592	1.592
33.6844	721.4	0.0266646				1.593	1.593
33.7056	728.3	0.0365141				1.594	1.594
33.7268	728	0.0361168				1.595	1.595
33.7481	730.3	0.03942				1.596	1.596
33.7693	715.6	0.018527				1.597	1.597
33.7905	730.7	0.0400489				1.598	1.598
33.8117	746.8	0.0629954				1.599	1.599
33.8329	726.1	0.0335606				1.6	1.6
33.8541	745.9	0.0617752				1.601	1.601
33.8753	730	0.0391716				1.602	1.602
33.8965	736.1	0.0478851				1.603	1.603
33.9178	744	0.0591616				1.604	1.604
33.939	736.8	0.0489417				1.605	1.605
33.9602	744.8	0.0603613				1.606	1.606
33.9814	739.3	0.0525611				1.607	1.607
34.0026	751.2	0.0695341				1.608	1.608
34.0238	754.7	0.0745481				1.609	1.609
34.045	763.1	0.0865392				1.61	1.61
34.0662	752.7	0.0717619				1.611	1.611
34.0875	743.7	0.0589772				1.612	1.612
34.1087	754	0.0736745				1.613	1.613
34.1299	761.4	0.084243				1.614	1.614
34.1511	764.4	0.0885462				1.615	1.615
34.1723	767.9	0.0935617				1.616	1.616
34.1935	763.1	0.0867572				1.617	1.617
34.2147	761.6	0.0846521				1.618	1.618
34.2359	770.8	0.097786				1.619	1.619
34.2571	763.5	0.0874204				1.62	1.62
34.2784	774.5	0.103119				1.621	1.621
34.2996	769.1	0.095459				1.622	1.622
34.3208	760.8	0.0836681				1.623	1.623
34.342	777.3	0.107202				1.624	1.624
34.3632	784.3	0.117205				1.625	1.625
34.3844	772.2	0.100001				1.626	1.626
34.4056	779.2	0.110004				1.627	1.627
34.4268	766.3	0.0916586				1.628	1.628
34.4481	774.2	0.102944				1.629	1.629
34.4693	765.9	0.0911513				1.63	1.63
34.4905	775.2	0.104432				1.631	1.631
34.5117	766.4	0.0919263				1.632	1.632
34.5329	760.1	0.0829814				1.633	1.633
34.5541	774.3	0.103245				1.634	1.634
34.5753	781.2	0.113108				1.635	1.635
34.5965	779	0.110005				1.636	1.636
34.6177	782.1	0.114455				1.637	1.637
34.639	780.7	0.112492				1.638	1.638
34.6602	776.7	0.106823				1.639	1.639
34.6814	777.6	0.108138				1.64	1.64
34.7026	763.1	0.0875053				1.641	1.641
34.7238	785.4	0.119317				1.642	1.642
34.745	777.9	0.108661				1.643	1.643
34.7662	791.9	0.128646				1.644	1.644
34.7874	778.9	0.110149				1.645	1.645
34.8087	793.3	0.130706				1.646	1.646
34.8299	793	0.130311				1.647	1.647
34.8511	780.9	0.113096				1.648	1.648
34.8723	786.3	0.120825				1.649	1.649
34.8935	786.1	0.120572				1.65	1.65
34.9147	783.7	0.117183				1.651	1.651
34.9359	788.6	0.1242				1.652	1.652
34.9571	785	0.1191				1.653	1.653
34.9783	777	0.107727				1.654	1.654
34.9996	792.3	0.129572				1.655	1.655
35.0208	804.8	0.147426				1.656	1.656
35.042	796.1	0.135055				1.657	1.657
35.0632	796.9	0.136228				1.658	1.658
35.0844	789.2	0.125282				1.659	1.659
35.1056	802.6	0.144421				1.66	1.66
35.1268	782.1	0.115222				1.661	1.661
35.148	792.2	0.129656				1.662	1.662
35.1693	792.8	0.130545				1.663	1.663
35.1905	789.5	0.125871				1.664	1.664
35.2117	790.8	0.127757				1.665	1.665
35.2329	804.1	0.146757				1.666	1.666
35.2541	800.9	0.142226				1.667	1.667
35.2753	792.8	0.130707				1.668	1.668
35.2965	791.8	0.129313				1.669	1.669
35.3177	797	0.136762				1.67	1.67
35.339	786.5	0.121818				1.671	1.671
35.3602	795.9	0.135258				1.672	1.672
35.3814	799.1	0.139856				1.673	1.673
35.4026	797.8	0.138034				1.674	1.674
35.4238	795.6	0.134928				1.675	1.675
35.445	795	0.134105				1.676	1.676
35.4662	805.5	0.149117				1.677	1.677
35.4874	785.3	0.120332				1.678	1.678
35.5086	808.5	0.153463				1.679	1.679
35.5299	797.8	0.13823				1.68	1.68
35.5511	794.4	0.133412				1.681	1.681
35.5723	790.6	0.128022				1.682	1.682
35.5935	793.4	0.13205				1.683	1.683
35.6147	791.3	0.129086				1.684	1.684
35.6359	793.4	0.132115				1.685	1.685
35.6571	797.2	0.13757				1.686	1.686
35.6783	796.1	0.136033				1.687	1.687
35.6996	804.8	0.148481				1.688	1.688
35.7208	781.6	0.115405				1.689	1.689
35.742	793.2	0.131992				1.69	1.69
35.7632	786.4	0.12232				1.691	1.691
35.7844	801.2	0.143475				1.692	1.692
35.8056	802	0.144649				1.693	1.693
35.8268	792.3	0.130838				1.694	1.694
35.848	793.5	0.132583				1.695	1.695
35.8692	799.7	0.141465				1.696	1.696
35.8905	798.9	0.140356				1.697	1.697
35.9117	794.1	0.133537				1.698	1.698
35.9329	793.5	0.132713				1.699	1.699
35.9541	787.5	0.12418				1.7	1.7
35.9753	800.7	0.143057				1.701	1.701
35.9965	796.8	0.137522				1.702	1.702
36.0177	794	0.133557				1.703	1.703
36.0389	804.1	0.148009				1.704	1.704
36.0602	791.1	0.129482				1.705	1.705
36.0814	796	0.13651				1.706	1.706
36.1026	797.6	0.138827				1.707	1.707
36.1238	806	0.150854				1.708	1.708
36.145	799.2	0.141178				1.709	1.709
36.1662	789.6	0.127502				1.71	1.71
36.1874	809	0.155237				1.711	1.711
36.2086	794.9	0.135135				1.712	1.712
36.2298	803.6	0.147592				1.713	1.713
36.2511	806	0.151053				1.714	1.714
36.2723	796.9	0.13809				1.715	1.715
36.2935	802.8	0.146549				1.716	1.716
36.3147	810	0.156865				1.717	1.717
36.3359	797.2	0.138616				1.718	1.718
36.3571	804.9	0.149647				1.719	1.719
36.3783	804.8	0.149537				1.72	1.72
36.3995	774	0.105576				1.721	1.721
36.4208	801.3	0.144604				1.722	1.722
36.442	782.5	0.117781				1.723	1.723
36.4632	781.5	0.116385				1.724	1.724
36.4844	792.6	0.132274				1.725	1.725
36.5056	807.9	0.154164				1.726	1.726
36.5268	789.8	0.128339				1.727	1.727
36.548	793	0.132943				1.728	1.728
36.5692	792.6	0.132404				1.729	1.729
36.5904	805.2	0.150439				1.73	1.73
36.6117	778.7	0.112609				1.731	1.731
36.6329	799.7	0.142647				1.732	1.732
36.6541	796.5	0.138107				1.733	1.733
36.6753	800.7	0.144141				1.734	1.734
36.6965	796.7	0.138458				1.735	1.735
36.7177	797.7	0.13992				1.736	1.736
36.7389	807.2	0.153529				1.737	1.737
36.7601	799.1	0.141986				1.738	1.738
36.7814	798.5	0.141162				1.739	1.739
36.8026	799.4	0.142481				1.74	1.74
36.8238	797.2	0.139369				1.741	1.741
36.845	788.6	0.127111				1.742	1.742
36.8662	791.3	0.131002				1.743	1.743
36.8874	777.4	0.111167				1.744	1.744
36.9086	775.4	0.10834				1.745	1.745
36.9298	799.1	0.142249				1.746	1.746
36.9511	803.3	0.148286				1.747	1.747
36.9723	799.3	0.142601				1.748	1.748
36.9935	785.6	0.123049				1.749	1.749
37.0147	776	0.109357				1.75	1.75
37.0359	800	0.1437				1.751	1.751
37.0571	783	0.119429				1.752	1.752
37.0783	797.9	0.140764				1.753	1.753
37.0995	795.2	0.136936				1.754	1.754
37.1207	784.3	0.121384				1.755	1.755
37.142	788.4	0.127279				1.756	1.756
37.1632	799.6	0.143326				1.757	1.757
37.1844	792.4	0.133063				1.758	1.758
37.2056	797.9	0.140961				1.759	1.759
37.2268	776.6	0.110535				1.76	1.76
37.248	782.6	0.119147				1.761	1.761
37.2692	790.5	0.130477				1.762	1.762
37.2904	788	0.126934				1.763	1.763
37.3117	791.5	0.131972				1.764	1.764
37.3329	790	0.129859				1.765	1.765
37.3541	783.6	0.120738				1.766	1.766
37.3753	780.4	0.116193				1.767	1.767
37.3965	789	0.128526				1.768	1.768
37.4177	785.5	0.123552				1.769	1.769
37.4389	797.1	0.140178				1.77	1.77
37.4601	779.3	0.114748				1.771	1.771
37.4813	791.7	0.132519				1.772	1.772
37.5026	787.8	0.126972				1.773	1.773
37.5238	784.9	0.122856				1.774	1.774
37.545	778.4	0.113589				1.775	1.775
37.5662	785.4	0.123636				1.776	1.776
37.5874	790.6	0.131108				1.777	1.777
37.6086	793.2	0.13486				1.778	1.778
37.6298	791.3	0.132175				1.779	1.779
37.651	791.9	0.133066				1.78	1.78
37.6723	787.4	0.126659				1.781	1.781
37.6935	788.8	0.128695				1.782	1.782
37.7147	801.1	0.146328				1.783	1.783
37.7359	790.9	0.131765				1.784	1.784
37.7571	805.3	0.152405				1.785	1.785
37.7783	780.1	0.116375				1.786	1.786
37.7995	787	0.126282				1.787	1.787
37.8207	784.4	0.122593				1.788	1.788
37.8419	782.2	0.119477				1.789	1.789
37.8632	795.8	0.138974				1.79	1.79
37.8844	789.4	0.129846				1.791	1.791
37.9056	795	0.137894				1.792	1.792
37.9268	797.2	0.141076				1.793	1.793
37.948	781.5	0.118636				1.794	1.794
37.9692	782.4	0.119957				1.795	1.795
37.9904	807.1	0.155346				1.796	1.796
38.0116	788.5	0.128753				1.797	1.797
38.0329	787.2	0.126925				1.798	1.798
38.0541	778	0.113787				1.799	1.799
38.0753	803.1	0.149753				1.8	1.8
38.0965	778.3	0.11428				1.801	1.801
38.1177	782.7	0.120612				1.802	1.802
38.1389	776.6	0.11191				1.803	1.803
38.1601	782.2	0.119961				1.804	1.804
38.1813	774.5	0.108968				1.805	1.805
38.2026	779	0.115443				1.806	1.806
38.2238	775.8	0.110893				1.807	1.807
38.245	781	0.118371				1.808	1.808
38.2662	770.7	0.103654				1.809	1.809
38.2874	774.8	0.109557				1.81	1.81
38.3086	779.3	0.116034				1.811	1.811
38.3298	772.5	0.106327				1.812	1.812
38.351	772.3	0.106073				1.813	1.813
38.3722	787	0.127158				1.814	1.814
38.3935	772.1	0.10585				1.815	1.815
38.4147	757.9	0.0855431				1.816	1.816
38.4359	787.9	0.128545				1.817	1.817
38.4571	754.3	0.0804491				1.818	1.818
38.4783	759.4	0.0877856				1.819	1.819
38.4995	761	0.0901089				1.82	1.82
38.5207	757.6	0.0852698				1.821	1.821
38.5419	752.7	0.0782816				1.822	1.822
38.5632	768.3	0.100661				1.823	1.823
38.5844	760.3	0.0892318				1.824	1.824
38.6056	748.8	0.0727874				1.825	1.825
38.6268	761.7	0.0913004				1.826	1.826
38.648	769	0.101791				1.827	1.827
38.6692	737.2	0.0562597				1.828	1.828
38.6904	756.5	0.083944				1.829	1.829
38.7116	753.1	0.0791035				1.83	1.83
38.7328	759.8	0.0887352				1.831	1.831
38.7541	737.8	0.0572414				1.832	1.832
38.7753	748.1	0.0720318				1.833	1.833
38.7965	735.8	0.0544362				1.834	1.834
38.8177	734.3	0.052317				1.835	1.835
38.8389	745.8	0.0688284				1.836	1.836
38.8601	744.7	0.0672827				1.837	1.837
38.8813	740.4	0.0611507				1.838	1.838
38.9025	737.2	0.0565949				1.839	1.839
38.9238	742.3	0.0639352				1.84	1.84
38.945	732.5	0.0499192				1.841	1.841
38.9662	737.1	0.056543				1.842	1.842
38.9874	740.8	0.0618771				1.843	1.843
39.0086	738	0.0578941				1.844	1.844
39.0298	734.2	0.0524773				1.845	1.845
39.051	733.2	0.0510741				1.846	1.846
39.0722	727.2	0.0425029				1.847	1.847
39.0934	728.2	0.0439666				1.848	1.848
39.1147	735.7	0.0547492				1.849	1.849
39.1359	734.2	0.0526291				1.85	1.85
39.1571	735.5	0.0545233				1.851	1.851
39.1783	731.4	0.0486752				1.852	1.852
39.1995	728.2	0.0441172				1.853	1.853
39.2207	725.1	0.0397023				1.854	1.854
39.2419	710.8	0.0192274				1.855	1.855
39.2631	716.8	0.0278605				1.856	1.856
39.2844	725.7	0.0406528				1.857	1.857
39.3056	733.5	0.0518683				1.858	1.858
39.3268	708.2	0.0156164				1.859	1.859
39.348	717.2	0.0285528				1.86	1.86
39.3692	716.2	0.0271483				1.861	1.861
39.3904	730	0.04697				1.862	1.862
39.4116	713.7	0.023622				1.863	1.863
39.4328	714	0.0240819				1.864	1.864
39.4541	725.3	0.0403193				1.865	1.865
39.4753	722.1	0.0357594				1.866	1.866
39.4965	710.6	0.0192935				1.867	1.867
39.5177	725.1	0.0401225				1.868	1.868
39.5389	708.2	0.0159096				1.869	1.869
39.5601	715.5	0.026411				1.87	1.87
39.5813	719.8	0.0326094				1.871	1.871
39.6025	714	0.0243184				1.872	1.872
39.6237	700	0.00426271				1.873	1.873
39.645	710.9	0.01993				1.874	1.874
39.6662	718.5	0.0308635				1.875	1.875
39.6874	711.9	0.0214236				1.876	1.876
39.7086	710.2	0.0190139				1.877	1.877
39.7298	715.7	0.0269351				1.878	1.878
39.751	698.8	0.00271482				1.879	1.879
39.7722	702.6	0.00819659				1.88	1.88
39.7934	705.9	0.0129612				1.881	1.881
39.8147	712	0.0217441				1.882	1.882
39.8359	711.4	0.0209126				1.883	1.883
39.8571	711.5	0.0210856				1.884	1.884
39.8783	707.7	0.0156615				1.885	1.885
39.8995	705.3	0.0122464				1.886	1.886
39.9207	709	0.017586				1.887	1.887
39.9419	700.6	0.005559				1.888	1.888
39.9631	718.8	0.0317109				1.889	1.889
39.9843	691.7	-0.00715766				1.89	1.89
40.0056	703.3	0.00952174				1.891	1.891
40.0268	708.5	0.0170152				1.892	1.892
40.048	692.3	-0.00621032				1.893	1.893
40.0692	707.1	0.0150643				1.894	1.894
40.0904	702.2	0.00805928				1.895	1.895
40.1116	711.7	0.0217267				1.896	1.896
40.1328	699	0.00352343				1.897	1.897
40.154	711.2	0.0210679				1.898	1.898
40.1753	705.6	0.0130573				1.899	1.899
40.1965	706.3	0.0140916				1.9	1.9
40.2177	701.3	0.00694181				1.901	1.901
40.2389	707.1	0.0152989				1.902	1.902
40.2601	706.5	0.0144667				1.903	1.903
40.2813	712.8	0.0235425				1.904	1.904
40.3025	696.5	0.000165466				1.905	1.905
40.3237	706.1	0.0139803				1.906	1.906
40.3449	716.1	0.0283703				1.907	1.907
40.3662	703	0.00958692				1.908	1.908
40.3874	701.1	0.0068874				1.909	1.909
40.4086	699.8	0.00504945				1.91	1.91
40.4298	700.3	0.00579662				1.911	1.911
40.451	698.4	0.00309676				1.912	1.912
40.4722	703	0.00973283				1.913	1.913
40.4934	700.9	0.00674566				1.914	1.914
40.5146	709.1	0.0185533				1.915	1.915
40.5359	695.5	-0.000952934				1.916	1.916
40.5571	690.4	-0.00825013				1.917	1.917
40.5783	701.1	0.00714939				1.918	1.918
40.5995	689.2	-0.00991667				1.919	1.919
40.6207	700.8	0.00677664				1.92	1.92
40.6419	703.2	0.0102537				1.921	1.921
40.6631	692.6	-0.00494603				1.922	1.922
40.6843	685.3	-0.0154054				1.923	1.923
40.7055	697	0.00143333				1.924	1.924
40.7268	694	-0.00284817				1.925	1.925
40.748	697.1	0.00163493				1.926	1.926
40.7692	683.5	-0.017878				1.927	1.927
40.7904	699.9	0.0057163				1.928	1.928
40.8116	690	-0.00848076				1.929	1.929
40.8328	700.8	0.0070678				1.93	1.93
40.854	690.9	-0.00713004				1.931	1.931
40.8752	692.8	-0.00437082				1.932	1.932
40.8965	704.2	0.0120415				1.933	1.933
40.9177	684.2	-0.0166731				1.934	1.934
40.9389	695.1	-0.00097879				1.935	1.935
40.9601	694.1	-0.00238717				1.936	1.936
40.9813	697.3	0.0022411				1.937	1.937
41.0025	696.1	0.000545264				1.938	1.938
41.0237	690.8	-0.00704401				1.939	1.939
41.0449	695.6	-0.000115569				1.94	1.94
41.0662	691	-0.00669907				1.941	1.941
41.0874	685	-0.0152955				1.942	1.942
41.1086	694.5	-0.00161011				1.943	1.943
41.1298	685.3	-0.0148072				1.944	1.944
41.151	685.5	-0.0144912				1.945	1.945
41.1722	692.8	-0.00396752				1.946	1.946
41.1934	692.2	-0.00480134				1.947	1.947
41.2146	688.8	-0.00966098				1.948	1.948
41.2358	688	-0.0107826				1.949	1.949
41.2571	694.9	-0.000832735				1.95	1.95
41.2783	692.8	-0.00382341				1.951	1.951
41.2995	680	-0.0222002				1.952	1.952
41.3207	695.4	-2.69978e-05				1.953	1.953
41.3419	687.1	-0.0119337				1.954	1.954
41.3631	694	-0.00198241				1.955	1.955
41.3843	694.6	-0.00109066				1.956	1.956
41.4055	689.2	-0.00882775				1.957	1.957
41.4268	698.7	0.00486374				1.958	1.958
41.448	693.3	-0.00287362				1.959	1.959
41.4692	695.8	0.000750922				1.96	1.96
41.4904	700	0.00682082				1.961	1.961
41.5116	685.3	-0.0142939				1.962	1.962
41.5328	681.6	-0.0195874				1.963	1.963
41.554	697.2	0.00288062				1.964	1.964
41.5752	702.6	0.0106775				1.965	1.965
41.5964	688.7	-0.00928876				1.966	1.966
41.6177	691.5	-0.0052321				1.967	1.967
41.6389	690.4	-0.00678577				1.968	1.968
41.6601	689.8	-0.0076202				1.969	1.969
41.6813	693.3	-0.00255605				1.97	1.97
41.7025	683.2	-0.0170584				1.971	1.971
41.7237	693.6	-0.00206666				1.972	1.972
41.7449	695.7	0.000983752				1.973	1.973
41.7661	686.3	-0.0125125				1.974	1.974
41.7874	701	0.00866789				1.975	1.975
41.8086	695.6	0.00092682				1.976	1.976
41.8298	679.3	-0.0224996				1.977	1.977
41.851	676.7	-0.0262128				1.978	1.978
41.8722	691.9	-0.00431076				1.979	1.979
41.8934	691.2	-0.0052893				1.98	1.98
41.9146	682.9	-0.0172054				1.981	1.981
41.9358	688.3	-0.00940533				1.982	1.982
41.957	688.6	-0.00894487				1.983	1.983
41.9783	675.1	-0.0283464				1.984	1.984
41.9995	693.2	-0.0022666				1.985	1.985
42.0207	684	-0.0154798				1.986	1.986
42.0419	689.5	-0.00753457				1.987	1.987
42.0631	687.5	-0.0103847				1.988	1.988
42.0843	684.1	-0.0152503				1.989	1.989
42.1055	690.3	-0.0062967				1.99	1.99
42.1267	695.2	0.000785964				1.991	1.991
42.148	689.4	-0.00753476				1.992	1.992
42.1692	694	-0.000883624				1.993	1.993
42.1904	696.4	0.00260058				1.994	1.994
42.2116	674.2	-0.0293324				1.995	1.995
42.2328	688.2	-0.00914746				1.996	1.996
42.254	679.1	-0.0222211				1.997	1.997
42.2752	683.3	-0.0161453				1.998	1.998
42.2964	685.2	-0.013381				1.999	1.999
42.3177	691.4	-0.0044248				2	2
42.3389	680	-0.0208118				2.001	2.001
42.3601	689.7	-0.00681514				2.002	2.002
[truncated: 158,997 more rows]
